# Supplementary material for: A Comparative Transcriptomic Meta-Analysis Revealed Conserved Key Genes and Regulatory Networks Involved in Drought Tolerance in Cereal Crops
Source: Int J Mol Sci. 2021 Dec 2;22(23):13062. doi: 10.3390/ijms222313062 (PMC8657901; doi:10.3390/ijms222313062)
Supplement: Supplementary file 1 [file ijms-22-13062-s001.zip]

Archive with 12 entries (12 files):
- Supplementary_File_S5.xlsx
- Supplementary_File_S6.xlsx
- Supplementary_file_S7.xlsx
- Supplementary_Table_S9.txt
- Supplementary_Tables_S1-S8.xlsx
- Figure S1.tif
- Figure S2.png
- Legends of Supplementary Materials.pdf
- Supplementary_File_S1.xlsx
- Supplementary_File_S2.xlsx
- Supplementary_File_S3.xlsx
- Supplementary_File_S4.xlsx
