# Supplementary material for: A Comparative Transcriptomic Meta-Analysis Revealed Conserved Key Genes and Regulatory Networks Involved in Drought Tolerance in Cereal Crops
Source: Int J Mol Sci. 2021 Dec 2;22(23):13062. doi: 10.3390/ijms222313062 (PMC8657901; doi:10.3390/ijms222313062)
Supplement: Supplementary file 1 [file ijms-22-13062-s001.zip › Supplementary_File_S1.xlsx]

## Sheet: Bd.sen
geneID	logFC	logCPM	LR	PValue	FDR
BRADI_1g19713v3	9.18898	4.76762	420.122	2.29529e-93	4.45377e-89
BRADI_5g00673v3	9.60229	4.3572	321.406	7.15734e-72	6.94405e-68
BRADI_3g45080v3	5.13388	4.98726	252.875	6.13226e-57	3.96635e-53
BRADI_3g41377v3	-7.67821	3.13181	229.145	9.15654e-52	4.44184e-48
BRADI_2g45567v3	3.8792	4.43068	222.433	2.66507e-50	1.03426e-46
BRADI_3g19240v3	4.72312	4.58881	215.704	7.82551e-49	2.53077e-45
BRADI_2g45053v3	6.36551	5.35078	209.017	2.25045e-47	6.23825e-44
BRADI_2g23780v3	3.22767	5.27456	200.908	1.32324e-45	3.20952e-42
BRADI_4g39520v3	6.32017	4.45059	197.742	6.49392e-45	1.40009e-41
BRADI_3g07770v3	4.78136	5.07465	196.873	1.0054e-44	1.95089e-41
BRADI_5g08290v3	7.43116	3.56995	191.694	1.35726e-43	2.28754e-40
BRADI_2g54810v3	5.21069	6.53562	191.611	1.41468e-43	2.28754e-40
BRADI_4g40870v3	4.95216	6.19774	179.623	5.8569e-41	8.74209e-38
BRADI_5g00810v3	-5.55465	4.87093	169.048	1.194e-38	1.65488e-35
BRADI_3g05292v3	-3.78646	3.95219	166.652	3.9853e-38	5.15538e-35
BRADI_1g65130v3	-8.08877	4.20665	162.219	3.70621e-37	4.49471e-34
BRADI_2g33170v3	13.3642	5.92748	156.636	6.14824e-36	7.01767e-33
BRADI_5g09200v3	3.71234	8.18241	152.854	4.12252e-35	4.44407e-32
BRADI_5g09000v3	3.75832	3.79016	149.233	2.55057e-34	2.6048e-31
BRADI_3g30320v3	12.065	4.64472	147.155	7.26025e-34	7.04389e-31
BRADI_4g23350v3	4.83101	4.51695	142.233	8.6466e-33	7.98946e-30
BRADI_1g51770v3	7.44155	3.5841	141.009	1.60164e-32	1.41265e-29
BRADI_3g50220v3	5.83991	6.27888	140.155	2.46266e-32	2.07763e-29
BRADI_4g40850v3	12.4622	5.03562	138.752	4.98958e-32	4.03407e-29
BRADI_4g40160v3	-5.71348	3.16041	137.434	9.6935e-32	7.52371e-29
BRADI_3g46320v3	4.54134	5.28374	136.752	1.36621e-31	1.01962e-28
BRADI_1g64590v3	5.65175	4.00842	132.557	1.12991e-30	8.12026e-28
BRADI_3g56970v3	7.93961	4.97573	130.732	2.83366e-30	1.96373e-27
BRADI_1g33670v3	-2.4618	5.12699	129.847	4.42577e-30	2.9613e-27
BRADI_3g39110v3	3.13067	6.98154	129.348	5.692e-30	3.68158e-27
BRADI_2g57476v3	-3.24338	4.32572	127.106	1.76094e-29	1.10223e-26
BRADI_4g29640v3	4.44924	4.15424	126.06	2.98342e-29	1.80907e-26
BRADI_4g35890v3	-4.9131	6.46076	123.425	1.12579e-28	6.61965e-26
BRADI_4g42400v3	5.18197	3.35467	122.473	1.81828e-28	1.0377e-25
BRADI_2g13190v3	4.99644	4.45087	119.305	8.98153e-28	4.97936e-25
BRADI_1g05530v3	6.3801	2.07815	118.621	1.2675e-27	6.83183e-25
BRADI_5g13047v3	2.53668	6.58084	118.528	1.32844e-27	6.96678e-25
BRADI_1g46710v3	7.33627	5.19775	118.122	1.63065e-27	8.3266e-25
BRADI_4g04670v3	-2.6291	6.42465	117.333	2.42672e-27	1.20739e-24
BRADI_2g37631v3	2.92719	4.8396	116.052	4.62951e-27	2.24578e-24
BRADI_1g31910v3	4.52231	2.65548	114.711	9.10382e-27	4.30855e-24
BRADI_1g11240v3	5.26283	6.52546	113.714	1.50556e-26	6.9557e-24
BRADI_1g51800v3	6.71183	2.38414	111.803	3.9461e-26	1.7807e-23
BRADI_5g18040v3	-4.17457	3.64747	111.721	4.113e-26	1.81383e-23
BRADI_5g10177v3	2.85778	4.12292	110.561	7.38555e-26	3.18465e-23
BRADI_2g45470v3	5.5013	4.4637	110.373	8.11786e-26	3.42432e-23
BRADI_2g54920v3	5.16271	8.60836	108.994	1.62765e-25	6.71975e-23
BRADI_1g37410v3	11.6737	10.3328	108.908	1.70016e-25	6.87289e-23
BRADI_3g37623v3	5.74001	3.66641	107.946	2.76154e-25	1.09357e-22
BRADI_1g21040v3	3.08746	6.87433	106.74	5.07658e-25	1.97012e-22
BRADI_1g34647v3	2.91853	3.8942	104.713	1.41153e-24	5.37045e-22
BRADI_2g52317v3	6.24655	4.73937	104.051	1.97131e-24	7.35604e-22
BRADI_2g06150v3	-3.75391	5.56805	103.763	2.28027e-24	8.34838e-22
BRADI_3g37130v3	3.91241	7.55077	102.761	3.78198e-24	1.35899e-21
BRADI_5g19650v3	2.49158	3.83979	101.893	5.86085e-24	2.06771e-21
BRADI_4g08240v3	3.60159	5.94235	101.639	6.66063e-24	2.30791e-21
BRADI_4g29720v3	-3.47384	5.4915	101.585	6.84777e-24	2.33113e-21
BRADI_5g02030v3	-3.87037	4.73675	100.933	9.51652e-24	3.18377e-21
BRADI_2g17550v3	3.48059	4.78892	100.745	1.04614e-23	3.44056e-21
BRADI_3g51200v3	3.61421	6.56347	100.294	1.31392e-23	4.24922e-21
BRADI_2g11567v3	12.9493	5.51692	99.5775	1.88633e-23	6.00039e-21
BRADI_1g65780v3	4.09205	6.61841	99.4663	1.99532e-23	6.2447e-21
BRADI_5g18377v3	2.85404	3.7942	99.3083	2.16099e-23	6.65585e-21
BRADI_2g43410v3	-5.67936	2.76615	98.5549	3.16135e-23	9.5848e-21
BRADI_2g25460v3	7.9516	2.76597	98.1753	3.82946e-23	1.14318e-20
BRADI_1g44480v3	5.78672	5.06744	97.9929	4.19878e-23	1.23444e-20
BRADI_1g47570v3	3.11789	5.62853	95.8875	1.21601e-22	3.5217e-20
BRADI_5g23720v3	-8.65536	1.18891	94.2639	2.76143e-22	7.87983e-20
BRADI_1g03760v3	4.72786	6.47407	94.1893	2.86739e-22	8.06361e-20
BRADI_2g26740v3	-5.5763	2.1675	93.8463	3.41005e-22	9.45266e-20
BRADI_2g41950v3	2.45994	5.20711	93.6201	3.82282e-22	1.04476e-19
BRADI_1g62890v3	2.76004	4.02485	93.1672	4.80584e-22	1.27782e-19
BRADI_4g17200v3	12.8239	5.39295	93.1666	4.80732e-22	1.27782e-19
BRADI_1g20596v3	4.30788	2.07341	92.9228	5.43745e-22	1.42579e-19
BRADI_2g18090v3	10.1685	5.74099	91.4574	1.14023e-21	2.95001e-19
BRADI_4g13970v3	3.02323	4.88689	90.1459	2.21225e-21	5.64821e-19
BRADI_3g46200v3	2.82242	4.9342	89.6426	2.85315e-21	7.18995e-19
BRADI_3g10600v3	-5.33663	2.77842	89.3405	3.32393e-21	8.26891e-19
BRADI_3g37920v3	9.08996	1.81014	88.7108	4.56966e-21	1.1224e-18
BRADI_1g20280v3	4.11671	2.82459	86.4001	1.46974e-20	3.56486e-18
BRADI_3g07897v3	3.44984	3.79457	85.6906	2.10411e-20	5.0405e-18
BRADI_1g32160v3	-2.82077	3.23079	85.623	2.17725e-20	5.15211e-18
BRADI_5g16390v3	5.18869	5.68394	85.3064	2.55529e-20	5.97383e-18
BRADI_3g29080v3	-3.22526	2.41396	85.2451	2.63576e-20	6.0886e-18
BRADI_1g56817v3	-4.77952	2.25032	84.9423	3.07201e-20	7.01285e-18
BRADI_1g13760v3	6.0754	4.48351	84.5608	3.72589e-20	8.40664e-18
BRADI_3g37171v3	3.35097	2.59402	83.2856	7.10146e-20	1.58387e-17
BRADI_3g45260v3	2.17693	7.99202	82.5155	1.04846e-19	2.31186e-17
BRADI_1g12117v3	4.74668	8.39433	82.1687	1.24951e-19	2.72422e-17
BRADI_3g26396v3	-4.74656	1.85869	82.0596	1.32045e-19	2.84688e-17
BRADI_1g63510v3	6.75931	5.96044	81.4244	1.82099e-19	3.88291e-17
BRADI_2g54777v3	5.69278	2.29492	81.259	1.97992e-19	4.1759e-17
BRADI_1g68260v3	-2.7082	3.52159	81.224	2.01534e-19	4.20491e-17
BRADI_5g09610v3	5.42429	4.96615	81.1164	2.12811e-19	4.39296e-17
BRADI_1g06410v3	-4.71588	2.08104	81.0539	2.19643e-19	4.48626e-17
BRADI_1g66920v3	5.22375	6.08874	80.5048	2.9e-19	5.86162e-17
BRADI_2g36580v3	2.86375	4.07005	80.3127	3.19615e-19	6.39363e-17
BRADI_2g01950v3	4.0599	3.64408	80.2803	3.24896e-19	6.43294e-17
BRADI_4g19690v3	1.964	5.06502	79.9253	3.88832e-19	7.62111e-17
BRADI_1g22140v3	4.53737	4.20532	79.8242	4.09251e-19	7.88362e-17
BRADI_3g43577v3	2.78951	9.03617	79.8189	4.10351e-19	7.88362e-17
BRADI_2g08950v3	-6.60343	0.827321	79.381	5.12154e-19	9.74297e-17
BRADI_3g38514v3	5.10049	2.26605	79.2677	5.42393e-19	1.0218e-16
BRADI_2g02720v3	-3.26755	4.80898	79.0688	5.99828e-19	1.11914e-16
BRADI_1g66317v3	-3.13816	2.26364	78.8488	6.70516e-19	1.23911e-16
BRADI_2g49387v3	2.47917	5.23297	78.7753	6.95909e-19	1.27391e-16
BRADI_4g12600v3	3.03767	6.19503	78.5572	7.77158e-19	1.40934e-16
BRADI_2g19640v3	-2.66311	5.9792	78.3714	8.5378e-19	1.53396e-16
BRADI_1g75220v3	-1.88587	7.2035	77.3657	1.42058e-18	2.5289e-16
BRADI_4g30850v3	-2.01803	3.60707	76.8795	1.8171e-18	3.20537e-16
BRADI_2g54910v3	5.5593	1.34843	76.6916	1.99851e-18	3.4936e-16
BRADI_1g55480v3	3.15169	4.13864	76.5612	2.13496e-18	3.69882e-16
BRADI_1g46440v3	2.28275	5.93705	76.5428	2.1549e-18	3.70033e-16
BRADI_4g06300v3	-1.87203	6.60471	76.3451	2.38187e-18	4.0542e-16
BRADI_2g45030v3	11.6693	4.25897	76.0043	2.83047e-18	4.77586e-16
BRADI_3g44071v3	5.1161	2.48262	75.6224	3.43435e-18	5.74484e-16
BRADI_5g21383v3	-4.15072	1.93767	75.5708	3.52539e-18	5.84672e-16
BRADI_2g01920v3	7.70797	2.53898	75.3403	3.96181e-18	6.51482e-16
BRADI_2g52490v3	2.84343	3.73852	75.0733	4.53555e-18	7.39561e-16
BRADI_1g69530v3	-3.47621	7.62082	74.7532	5.33383e-18	8.6248e-16
BRADI_4g44130v3	2.34217	5.68547	74.6552	5.60537e-18	8.98439e-16
BRADI_1g24710v3	2.8042	3.05803	74.64	5.64881e-18	8.98439e-16
BRADI_1g34830v3	3.0597	6.92635	74.3394	6.57776e-18	1.03768e-15
BRADI_3g45636v3	2.03965	6.10921	73.9341	8.07676e-18	1.26388e-15
BRADI_1g71350v3	6.07656	6.61936	73.3319	1.09585e-17	1.70111e-15
BRADI_4g28097v3	6.2862	4.78016	72.9037	1.36132e-17	2.09644e-15
BRADI_4g33400v3	3.83161	2.33548	72.4496	1.71355e-17	2.61809e-15
BRADI_3g14080v3	3.03004	5.43929	72.3425	1.80908e-17	2.72601e-15
BRADI_3g37150v3	9.29545	5.36594	72.339	1.81229e-17	2.72601e-15
BRADI_1g71860v3	-2.84713	4.08148	71.5303	2.7303e-17	4.07529e-15
BRADI_4g39370v3	2.22508	3.67857	71.3482	2.99429e-17	4.43521e-15
BRADI_3g02910v3	-3.30903	5.98907	71.1378	3.33132e-17	4.89704e-15
BRADI_5g11240v3	-3.36939	4.24363	71.0742	3.44046e-17	5.01945e-15
BRADI_1g31570v3	-2.50496	4.30325	70.899	3.75996e-17	5.44465e-15
BRADI_3g36542v3	3.97065	3.21132	70.7797	3.9942e-17	5.741e-15
BRADI_3g40250v3	-4.25631	1.24942	70.7353	4.08522e-17	5.82865e-15
BRADI_2g60306v3	3.26519	2.07736	70.4111	4.81487e-17	6.81955e-15
BRADI_5g18470v3	3.20401	4.6105	70.3094	5.06964e-17	7.12836e-15
BRADI_2g22660v3	6.62473	4.40329	70.006	5.91236e-17	8.25348e-15
BRADI_4g30130v3	-1.95748	4.14011	69.6734	6.99838e-17	9.69975e-15
BRADI_3g39210v3	3.23078	7.28927	69.5655	7.3918e-17	1.01724e-14
BRADI_2g17530v3	6.07769	4.64979	69.235	8.74012e-17	1.19432e-14
BRADI_1g20520v3	3.10942	4.70093	69.1046	9.3379e-17	1.26708e-14
BRADI_1g45567v3	-7.45662	0.0726297	69.0553	9.57389e-17	1.29008e-14
BRADI_1g59680v3	-5.19648	0.703535	68.8976	1.03709e-16	1.38785e-14
BRADI_2g54300v3	-4.6715	3.38935	68.7206	1.13449e-16	1.50778e-14
BRADI_2g05980v3	-2.00311	6.08263	68.6091	1.20048e-16	1.58463e-14
BRADI_2g20767v3	-2.80176	3.27839	68.4047	1.33159e-16	1.74583e-14
BRADI_3g00757v3	2.74043	3.03093	68.3271	1.38508e-16	1.80376e-14
BRADI_2g27180v3	4.20821	6.37539	68.2357	1.45078e-16	1.87673e-14
BRADI_1g69250v3	3.12155	4.7505	68.1584	1.50879e-16	1.93884e-14
BRADI_3g28995v3	5.65477	4.23202	68.087	1.56441e-16	1.99709e-14
BRADI_5g01327v3	-4.8804	0.770581	67.864	1.75169e-16	2.22155e-14
BRADI_1g07430v3	2.94412	4.63798	67.788	1.82054e-16	2.29388e-14
BRADI_4g13660v3	9.00683	1.738	66.9886	2.73079e-16	3.4186e-14
BRADI_3g45090v3	6.11907	3.6167	66.6442	3.25215e-16	4.04518e-14
BRADI_1g05467v3	1.67824	5.3068	66.6109	3.3076e-16	4.08794e-14
BRADI_2g51160v3	3.96863	1.63573	66.4716	3.54968e-16	4.35936e-14
BRADI_1g57337v3	7.49676	3.13159	66.3316	3.81095e-16	4.6508e-14
BRADI_3g59070v3	2.95315	2.44895	66.105	4.27529e-16	5.18486e-14
BRADI_1g76490v3	5.83812	3.85611	65.9708	4.57643e-16	5.51559e-14
BRADI_3g18390v3	-2.20366	4.97081	65.9436	4.64005e-16	5.55775e-14
BRADI_3g36407v3	4.44178	3.15477	65.8332	4.90733e-16	5.84183e-14
BRADI_4g33903v3	-2.94035	1.89266	65.6686	5.33484e-16	6.31202e-14
BRADI_4g43090v3	-3.29279	3.06152	65.4548	5.94635e-16	6.9929e-14
BRADI_2g18106v3	13.9037	6.46366	65.4217	6.04698e-16	7.06841e-14
BRADI_1g09930v3	2.04167	6.1305	65.0621	7.2576e-16	8.43272e-14
BRADI_2g41880v3	-1.96071	4.56274	64.9985	7.49533e-16	8.65711e-14
BRADI_1g10689v3	-4.39377	0.602385	64.8521	8.07374e-16	9.26999e-14
BRADI_2g54740v3	6.60294	1.52684	64.7411	8.54143e-16	9.74929e-14
BRADI_2g41117v3	2.36513	2.86267	64.5293	9.51088e-16	1.07923e-13
BRADI_4g06067v3	3.15244	1.91573	64.4319	9.99258e-16	1.1273e-13
BRADI_1g42000v3	3.03729	6.28575	64.4065	1.01224e-15	1.13535e-13
BRADI_2g53040v3	3.02285	4.1338	63.5884	1.53328e-15	1.70819e-13
BRADI_1g44430v3	2.51593	4.11483	63.5791	1.54058e-15	1.70819e-13
BRADI_4g32960v3	1.72667	5.46967	63.5051	1.59952e-15	1.76348e-13
BRADI_1g02630v3	2.16871	6.14103	62.8576	2.222e-15	2.43591e-13
BRADI_2g12637v3	2.69171	4.53677	62.8076	2.27919e-15	2.48458e-13
BRADI_3g60160v3	2.81418	7.23979	62.7281	2.3731e-15	2.57249e-13
BRADI_3g44260v3	7.85825	6.04758	62.6899	2.41952e-15	2.60824e-13
BRADI_1g28540v3	1.77837	4.48193	62.4717	2.70296e-15	2.89769e-13
BRADI_5g17150v3	3.65372	1.97589	62.4424	2.74347e-15	2.91615e-13
BRADI_2g46835v3	2.92282	3.33234	62.4376	2.75023e-15	2.91615e-13
BRADI_3g39300v3	-4.81479	2.1745	62.4235	2.76998e-15	2.92113e-13
BRADI_2g15560v3	-2.57047	4.11341	62.3582	2.86344e-15	3.00336e-13
BRADI_3g56917v3	2.85811	2.70212	62.2879	2.96744e-15	3.09571e-13
BRADI_1g55080v3	-2.07465	3.08065	62.1434	3.19344e-15	3.31366e-13
BRADI_4g40090v3	3.13345	5.94557	61.4545	4.53091e-15	4.67647e-13
BRADI_3g28120v3	5.31858	6.06339	61.3903	4.681e-15	4.80583e-13
BRADI_2g43380v3	-1.91203	5.78619	61.2341	5.06756e-15	5.15779e-13
BRADI_1g62957v3	4.1245	8.35349	61.2305	5.07699e-15	5.15779e-13
BRADI_5g21740v3	-1.97857	5.15281	60.9972	5.71568e-15	5.77641e-13
BRADI_2g22730v3	9.14954	1.86939	60.9099	5.97486e-15	6.00706e-13
BRADI_2g44540v3	-2.57581	5.14618	60.852	6.15303e-15	6.15429e-13
BRADI_1g20190v3	7.69657	0.580885	60.6539	6.80458e-15	6.77108e-13
BRADI_2g12330v3	-6.11283	1.55531	60.4642	7.4927e-15	7.41777e-13
BRADI_4g40178v3	1.62529	5.57938	60.151	8.78527e-15	8.65327e-13
BRADI_4g30380v3	4.23193	6.14251	59.9764	9.60018e-15	9.40818e-13
BRADI_1g26240v3	3.559	1.68502	59.7761	1.06288e-14	1.03211e-12
BRADI_1g37830v3	3.32145	5.93696	59.7743	1.06381e-14	1.03211e-12
BRADI_5g04330v3	-2.82293	5.21541	59.7637	1.06959e-14	1.03255e-12
BRADI_1g53437v3	-2.05403	4.07973	59.7329	1.08648e-14	1.04366e-12
BRADI_3g32770v3	5.21022	2.35566	59.7174	1.09507e-14	1.04647e-12
BRADI_1g75610v3	2.66667	6.61184	59.7082	1.10019e-14	1.04647e-12
BRADI_3g10270v3	6.33453	3.9476	59.5518	1.19118e-14	1.1241e-12
BRADI_3g53170v3	2.74047	4.31708	59.5481	1.19339e-14	1.1241e-12
BRADI_2g56096v3	2.11944	4.49175	59.5268	1.20639e-14	1.1274e-12
BRADI_4g28000v3	-1.94974	5.36631	59.5234	1.20851e-14	1.1274e-12
BRADI_3g43870v3	11.0216	8.96887	59.2881	1.362e-14	1.26451e-12
BRADI_5g16807v3	2.74523	3.73327	58.9385	1.62681e-14	1.50317e-12
BRADI_2g23507v3	2.99729	7.53994	58.9245	1.6384e-14	1.50671e-12
BRADI_1g37990v3	1.64721	4.72452	58.8433	1.70742e-14	1.56278e-12
BRADI_4g38960v3	2.72823	5.20013	58.8315	1.71771e-14	1.56481e-12
BRADI_2g42730v3	5.33195	1.1529	58.6586	1.8755e-14	1.70057e-12
BRADI_2g01420v3	2.7512	4.31777	58.4679	2.06638e-14	1.86493e-12
BRADI_2g07480v3	6.99855	3.19319	58.1094	2.4794e-14	2.22733e-12
BRADI_1g58380v3	1.83498	7.50679	58.0364	2.57308e-14	2.29178e-12
BRADI_2g12580v3	-8.30296	0.857654	58.0351	2.57477e-14	2.29178e-12
BRADI_5g15820v3	3.57145	3.92113	57.9272	2.72001e-14	2.41e-12
BRADI_2g22410v3	6.39068	7.15534	57.8916	2.7697e-14	2.44287e-12
BRADI_1g05450v3	-6.53504	5.31865	57.8209	2.87109e-14	2.52085e-12
BRADI_2g04690v3	-3.39403	5.13506	57.733	3.00222e-14	2.62411e-12
BRADI_3g26810v3	3.02945	1.95596	57.6096	3.1966e-14	2.78147e-12
BRADI_2g39970v3	-3.92059	2.79417	57.5567	3.28377e-14	2.84457e-12
BRADI_1g26520v3	-1.53961	5.67463	57.4741	3.42458e-14	2.94849e-12
BRADI_4g16440v3	-4.85177	0.390847	57.4686	3.43413e-14	2.94849e-12
BRADI_4g24120v3	2.90092	4.97103	57.3783	3.59548e-14	3.06216e-12
BRADI_2g02800v3	-1.76085	5.98661	57.3769	3.59809e-14	3.06216e-12
BRADI_2g27870v3	2.0964	5.16016	57.3074	3.72743e-14	3.15839e-12
BRADI_1g45760v3	-2.62138	8.99696	57.253	3.83211e-14	3.23297e-12
BRADI_5g19620v3	2.66573	3.09732	57.2305	3.87606e-14	3.25589e-12
BRADI_5g27340v3	2.96104	6.79391	57.2185	3.89994e-14	3.26183e-12
BRADI_1g17740v3	-4.31094	1.67945	57.2057	3.92537e-14	3.26901e-12
BRADI_3g35880v3	1.59561	5.22582	57.0521	4.24414e-14	3.51937e-12
BRADI_5g07190v3	7.8732	4.67184	57.0391	4.27229e-14	3.52764e-12
BRADI_1g17250v3	-2.12437	4.06712	57.0067	4.34319e-14	3.57098e-12
BRADI_1g77170v3	4.3507	1.38304	56.9688	4.42782e-14	3.62521e-12
BRADI_3g57470v3	-1.7654	4.93944	56.8925	4.60301e-14	3.7528e-12
BRADI_1g40262v3	7.88454	0.74474	56.5504	5.47756e-14	4.44714e-12
BRADI_2g44850v3	-3.87227	0.883567	56.4966	5.62963e-14	4.55155e-12
BRADI_1g07930v3	-1.59378	5.50418	56.454	5.75281e-14	4.63185e-12
BRADI_1g16630v3	4.40183	6.07745	56.4421	5.78791e-14	4.64085e-12
BRADI_2g56102v3	1.90282	4.224	56.376	5.98567e-14	4.77967e-12
BRADI_2g44377v3	-3.69146	1.58766	56.26	6.34938e-14	5.04932e-12
BRADI_5g24170v3	-1.78425	4.45474	56.235	6.43073e-14	5.09314e-12
BRADI_1g77260v3	3.64055	1.76287	56.0486	7.07024e-14	5.57236e-12
BRADI_2g49160v3	2.25144	7.1169	56.0422	7.09324e-14	5.57236e-12
BRADI_3g59722v3	8.07826	0.911752	55.9681	7.36552e-14	5.76292e-12
BRADI_3g31810v3	-3.67591	2.70792	55.9101	7.58605e-14	5.91164e-12
ENSRNA049997774	-8.59494	1.13206	55.6488	8.66439e-14	6.72495e-12
BRADI_1g30960v3	2.36706	4.44445	55.6028	8.86978e-14	6.85694e-12
BRADI_2g11990v3	1.99168	4.72325	55.5376	9.16864e-14	7.05985e-12
BRADI_3g07340v3	1.73839	6.04557	55.4959	9.36535e-14	7.18281e-12
BRADI_1g08710v3	-2.18711	4.22225	55.4785	9.44889e-14	7.21836e-12
BRADI_3g08730v3	3.0493	3.9044	55.4127	9.77029e-14	7.43462e-12
BRADI_5g25540v3	1.90422	6.39575	55.3691	9.98925e-14	7.57154e-12
BRADI_1g23440v3	4.07676	5.06819	55.3199	1.02426e-13	7.73339e-12
BRADI_2g35780v3	-3.77114	2.58899	55.1732	1.10361e-13	8.3002e-12
BRADI_3g58830v3	2.51326	6.65336	55.1328	1.12655e-13	8.42087e-12
BRADI_2g45143v3	-5.23091	5.20749	55.1297	1.12834e-13	8.42087e-12
BRADI_3g31410v3	1.86809	4.20956	54.7694	1.35534e-13	1.00762e-11
BRADI_3g02170v3	-1.86381	7.6982	54.6792	1.419e-13	1.05092e-11
BRADI_2g18510v3	2.39578	5.59348	54.6328	1.45291e-13	1.07195e-11
BRADI_2g16040v3	3.56578	4.89669	54.605	1.47357e-13	1.08112e-11
BRADI_3g44640v3	3.48586	8.11383	54.6012	1.47648e-13	1.08112e-11
BRADI_1g36580v3	1.70029	5.13378	54.512	1.54498e-13	1.12702e-11
BRADI_4g29360v3	4.38984	5.72016	54.436	1.60597e-13	1.16713e-11
BRADI_2g02330v3	5.76782	0.792868	54.4005	1.6352e-13	1.18274e-11
BRADI_3g36250v3	2.04568	6.10417	54.3952	1.63964e-13	1.18274e-11
BRADI_3g34610v3	2.51881	5.12997	54.3598	1.66945e-13	1.19978e-11
BRADI_3g55730v3	-1.69914	4.87066	54.3241	1.70007e-13	1.21727e-11
BRADI_1g10310v3	9.75455	4.49486	54.1103	1.89542e-13	1.35216e-11
BRADI_1g58550v3	3.55054	4.21366	54.0822	1.92278e-13	1.36666e-11
BRADI_1g01750v3	1.938	5.4302	54.0616	1.94302e-13	1.376e-11
BRADI_1g47017v3	-5.21201	2.71807	53.8978	2.1119e-13	1.49016e-11
BRADI_5g17170v3	3.34183	7.09951	53.8401	2.17487e-13	1.52903e-11
BRADI_3g37600v3	3.56204	3.08315	53.815	2.20286e-13	1.5422e-11
BRADI_3g41543v3	4.65063	1.01961	53.8091	2.2095e-13	1.5422e-11
BRADI_1g19716v3	2.6583	2.1068	53.5383	2.53595e-13	1.76371e-11
BRADI_5g20130v3	3.55105	1.10795	53.5115	2.5708e-13	1.77656e-11
BRADI_2g52870v3	-4.69238	3.50488	53.5101	2.57273e-13	1.77656e-11
BRADI_5g07750v3	1.91704	4.87934	52.9776	3.37377e-13	2.32144e-11
BRADI_1g20670v3	5.96595	5.03752	52.8699	3.56399e-13	2.44366e-11
BRADI_1g10917v3	4.6974	1.06565	52.7355	3.81624e-13	2.60741e-11
BRADI_3g56360v3	2.98073	1.60417	52.6409	4.00454e-13	2.72646e-11
BRADI_3g46360v3	3.82726	3.86084	52.6319	4.02304e-13	2.72948e-11
BRADI_3g19560v3	-2.73368	2.42675	52.5783	4.13436e-13	2.79523e-11
BRADI_5g12710v3	3.42807	1.90869	52.5089	4.28295e-13	2.88563e-11
BRADI_2g14656v3	5.37843	2.53289	52.3673	4.6032e-13	3.09067e-11
BRADI_5g01950v3	-3.1759	7.27899	52.3303	4.69076e-13	3.13861e-11
BRADI_4g31970v3	-1.73969	4.62023	52.2087	4.9905e-13	3.32769e-11
BRADI_1g45535v3	-5.20024	5.62659	51.8356	6.03479e-13	4.01024e-11
BRADI_2g03560v3	2.90703	3.87047	51.7884	6.1816e-13	4.09378e-11
BRADI_4g45037v3	-2.96242	5.20474	51.7479	6.31035e-13	4.16483e-11
BRADI_5g25860v3	-2.71811	5.56857	51.7365	6.34716e-13	4.17492e-11
BRADI_3g37480v3	1.68155	6.21565	51.6837	6.52005e-13	4.27416e-11
BRADI_3g14330v3	-4.41899	5.85665	51.1143	8.71392e-13	5.69309e-11
BRADI_1g58997v3	-4.30274	5.46088	50.9713	9.37254e-13	6.10284e-11
BRADI_4g03864v3	2.78833	2.27392	50.8779	9.82956e-13	6.37902e-11
BRADI_3g51230v3	-3.06293	1.79472	50.8193	1.01273e-12	6.55033e-11
BRADI_4g32690v3	3.18379	1.48512	50.7656	1.0408e-12	6.7095e-11
BRADI_2g06670v3	3.95275	1.75991	50.756	1.04591e-12	6.72016e-11
BRADI_2g41288v3	2.31766	7.4971	50.5648	1.15295e-12	7.37158e-11
BRADI_4g35850v3	-1.98571	4.67996	50.5574	1.15731e-12	7.37158e-11
BRADI_3g23210v3	-3.909	0.905554	50.555	1.15869e-12	7.37158e-11
BRADI_2g15237v3	3.26906	2.31342	50.5336	1.17139e-12	7.42802e-11
BRADI_5g22950v3	-2.29317	5.71589	50.4627	1.21453e-12	7.67648e-11
BRADI_3g47530v3	1.7186	4.58783	50.4125	1.24596e-12	7.84955e-11
BRADI_3g52290v3	-3.28406	1.51653	50.2845	1.32998e-12	8.35178e-11
BRADI_3g53740v3	3.17807	7.05854	50.2407	1.35998e-12	8.51257e-11
BRADI_3g44820v3	-1.90147	5.74126	50.2051	1.38487e-12	8.63331e-11
BRADI_2g36789v3	3.65192	2.86267	50.2004	1.38816e-12	8.63331e-11
BRADI_4g39780v3	-3.64271	3.30108	49.9782	1.55462e-12	9.63767e-11
BRADI_5g02490v3	-1.88688	6.10143	49.924	1.59818e-12	9.87617e-11
BRADI_3g28460v3	5.5133	4.83916	49.891	1.62525e-12	1.00116e-10
BRADI_3g55560v3	-2.34394	7.79276	49.738	1.75709e-12	1.07894e-10
BRADI_5g24810v3	2.75533	4.1222	49.7254	1.76845e-12	1.08015e-10
BRADI_2g07347v3	-3.76689	0.471259	49.7234	1.77019e-12	1.08015e-10
BRADI_3g46070v3	-3.85684	5.30244	49.5923	1.89255e-12	1.15119e-10
BRADI_3g33020v3	2.12866	3.45589	49.5549	1.92901e-12	1.1697e-10
BRADI_3g09290v3	-2.82184	4.44527	49.4893	1.99452e-12	1.20566e-10
BRADI_3g09850v3	2.33697	6.28874	49.3117	2.18356e-12	1.31583e-10
BRADI_1g49790v3	-2.13095	5.36324	49.2953	2.20191e-12	1.32278e-10
BRADI_2g07470v3	1.51491	5.45748	49.2264	2.28058e-12	1.36581e-10
BRADI_4g30570v3	-2.24766	5.31252	49.0303	2.5204e-12	1.5012e-10
BRADI_3g30860v3	3.53587	3.53847	49.029	2.52212e-12	1.5012e-10
BRADI_2g11931v3	2.8897	3.40376	48.9164	2.67111e-12	1.58502e-10
BRADI_2g46640v3	6.47606	4.27558	48.867	2.73928e-12	1.62052e-10
BRADI_2g07577v3	2.00634	4.67609	48.8259	2.79728e-12	1.6498e-10
BRADI_5g07910v3	7.50502	3.14678	48.7834	2.85849e-12	1.68079e-10
BRADI_3g14970v3	2.43881	5.36625	48.7605	2.89208e-12	1.69541e-10
BRADI_1g08106v3	-1.80278	3.69758	48.7514	2.90555e-12	1.69817e-10
BRADI_3g21480v3	2.18061	5.31162	48.6217	3.10419e-12	1.80882e-10
BRADI_2g07520v3	6.3399	5.94149	48.6109	3.12124e-12	1.81331e-10
BRADI_1g32840v3	3.41424	6.69229	48.6005	3.13787e-12	1.81753e-10
BRADI_1g55560v3	4.13372	7.27508	48.573	3.18213e-12	1.83768e-10
BRADI_5g08190v3	-2.43132	4.55145	48.5472	3.22432e-12	1.85652e-10
BRADI_4g06867v3	-2.54964	3.17403	48.408	3.4615e-12	1.98718e-10
BRADI_2g33270v3	1.61596	6.63042	48.3002	3.65714e-12	2.09331e-10
BRADI_4g16370v3	4.42369	2.20801	48.2913	3.67374e-12	2.09662e-10
BRADI_4g36120v3	-3.96471	5.19149	48.1491	3.95005e-12	2.24771e-10
BRADI_4g13920v3	-5.48266	2.79261	48.0928	4.06509e-12	2.3064e-10
BRADI_1g13800v3	8.61058	3.38833	48.0784	4.09519e-12	2.31671e-10
BRADI_4g40174v3	1.64562	7.36958	48.0547	4.14488e-12	2.338e-10
BRADI_4g14556v3	-4.5373	4.25182	47.8876	4.51359e-12	2.5386e-10
BRADI_3g04227v3	-1.87093	3.57338	47.8223	4.66656e-12	2.61705e-10
BRADI_1g77637v3	2.04357	5.3198	47.7883	4.74813e-12	2.65512e-10
BRADI_4g33870v3	2.52608	3.73555	47.7535	4.83328e-12	2.69497e-10
BRADI_3g43310v3	-1.89787	4.93469	47.671	5.0409e-12	2.80268e-10
BRADI_5g12982v3	3.58072	4.49421	47.6456	5.10656e-12	2.83108e-10
BRADI_2g26620v3	2.41946	2.96845	47.6295	5.14883e-12	2.84638e-10
BRADI_3g36541v3	4.2008	2.63478	47.5302	5.41631e-12	2.98574e-10
BRADI_4g22630v3	2.83712	5.13103	47.515	5.45834e-12	3.00039e-10
BRADI_2g09202v3	-2.66524	1.48316	47.4989	5.50337e-12	3.01659e-10
BRADI_2g59090v3	-2.23	6.28262	47.2419	6.27442e-12	3.42955e-10
BRADI_1g55780v3	3.12198	3.29662	47.2359	6.29365e-12	3.43039e-10
BRADI_1g58240v3	-2.4414	5.93896	47.1862	6.45522e-12	3.5086e-10
BRADI_1g62400v3	-3.16523	6.97683	47.1076	6.71939e-12	3.64198e-10
BRADI_1g73840v3	8.35391	4.83546	46.954	7.26712e-12	3.92789e-10
BRADI_5g27020v3	-2.1003	4.27289	46.943	7.30803e-12	3.93903e-10
BRADI_4g02060v3	2.52002	4.64691	46.9158	7.41045e-12	3.98317e-10
BRADI_5g17640v3	2.37723	2.88274	46.8041	7.8449e-12	4.20504e-10
BRADI_3g57960v3	1.84079	6.39922	46.7787	7.94708e-12	4.24808e-10
BRADI_4g35940v3	-1.53143	4.10772	46.7354	8.12498e-12	4.33124e-10
BRADI_4g08320v3	-5.90931	2.52865	46.719	8.19314e-12	4.35561e-10
BRADI_1g54553v3	3.14606	2.06066	46.6779	8.36685e-12	4.4358e-10
BRADI_3g09120v3	3.02855	6.96046	46.643	8.51707e-12	4.50314e-10
BRADI_1g63397v3	8.04162	2.87762	46.6191	8.62165e-12	4.54605e-10
BRADI_4g14620v3	7.37417	0.314068	46.584	8.77757e-12	4.60523e-10
BRADI_1g68010v3	-1.87769	5.6621	46.5831	8.78137e-12	4.60523e-10
BRADI_2g57732v3	-2.14704	2.31957	46.523	9.05503e-12	4.73164e-10
BRADI_2g58950v3	2.79414	6.69264	46.5195	9.07118e-12	4.73164e-10
BRADI_5g11350v3	-3.88665	4.59252	46.3288	9.99823e-12	5.20122e-10
BRADI_1g50840v3	-3.9249	1.463	46.2927	1.01845e-11	5.28394e-10
BRADI_2g02930v3	-2.52853	6.32301	46.1824	1.07739e-11	5.57482e-10
BRADI_3g13150v3	8.11454	0.938027	46.1199	1.11232e-11	5.7403e-10
BRADI_1g63816v3	5.21453	1.50702	46.09	1.12944e-11	5.81316e-10
BRADI_1g31100v3	3.46866	2.53229	46.0804	1.13499e-11	5.81499e-10
BRADI_3g57460v3	4.75276	2.99162	46.079	1.13579e-11	5.81499e-10
BRADI_1g37834v3	2.86337	3.57212	46.0422	1.15733e-11	5.90968e-10
BRADI_1g62880v3	-4.59146	4.76652	45.9501	1.21306e-11	6.17802e-10
BRADI_1g75950v3	-2.92589	5.06703	45.8017	1.30849e-11	6.64656e-10
BRADI_1g65501v3	-4.11921	3.89373	45.673	1.39736e-11	7.07945e-10
BRADI_3g32497v3	-2.14557	3.87652	45.6635	1.40412e-11	7.09518e-10
BRADI_5g02190v3	-2.65339	3.76171	45.6141	1.44002e-11	7.25771e-10
BRADI_1g20040v3	7.21396	0.180481	45.5898	1.45799e-11	7.32924e-10
BRADI_2g56470v3	-2.61262	4.11967	45.3865	1.61747e-11	8.10991e-10
BRADI_5g16160v3	-2.51899	4.43334	45.366	1.63448e-11	8.17406e-10
BRADI_3g28657v3	4.62949	1.35764	45.3129	1.67938e-11	8.37703e-10
BRADI_1g12290v3	3.52438	1.40828	45.2787	1.70894e-11	8.50263e-10
BRADI_1g66770v3	3.68454	1.39617	45.2682	1.71812e-11	8.52647e-10
BRADI_4g41420v3	-5.0499	0.127071	45.2589	1.72638e-11	8.54557e-10
BRADI_3g57230v3	1.78228	5.42667	45.201	1.77812e-11	8.77932e-10
BRADI_1g43347v3	8.64003	1.41176	45.1598	1.81599e-11	8.93152e-10
BRADI_1g03260v3	-2.75293	0.922964	45.1574	1.81816e-11	8.93152e-10
BRADI_1g39290v3	2.56653	1.70238	45.1212	1.8521e-11	9.07528e-10
BRADI_1g63910v3	3.05885	3.23649	45.0696	1.90152e-11	9.25084e-10
BRADI_4g34056v3	8.26155	1.07629	45.0688	1.90235e-11	9.25084e-10
BRADI_2g49310v3	-1.77441	5.5763	45.0654	1.90564e-11	9.25084e-10
BRADI_2g04310v3	-2.11022	7.49319	45.064	1.907e-11	9.25084e-10
BRADI_3g26745v3	8.76308	3.53373	45.0526	1.91816e-11	9.2818e-10
BRADI_1g25460v3	-2.24185	3.50317	45.0081	1.96221e-11	9.47132e-10
BRADI_5g15587v3	5.95694	0.96077	44.9292	2.04285e-11	9.83608e-10
BRADI_1g76500v3	-3.0844	7.07664	44.8824	2.09229e-11	1.00492e-09
BRADI_3g36120v3	-1.45219	4.47292	44.8386	2.13963e-11	1.0236e-09
BRADI_2g08370v3	2.4627	4.45845	44.8367	2.14173e-11	1.0236e-09
BRADI_4g23948v3	7.65026	2.48528	44.7486	2.2403e-11	1.06808e-09
BRADI_3g28780v3	-1.82976	2.94841	44.7208	2.27233e-11	1.08069e-09
BRADI_1g54800v3	1.7419	4.80656	44.6951	2.30235e-11	1.09129e-09
BRADI_2g00740v3	2.95176	4.7146	44.6921	2.30587e-11	1.09129e-09
BRADI_4g44250v3	1.5988	4.61639	44.6398	2.3683e-11	1.11811e-09
BRADI_5g01060v3	-2.39913	4.85706	44.5839	2.43691e-11	1.14771e-09
BRADI_2g24820v3	5.80225	4.64693	44.384	2.69884e-11	1.268e-09
BRADI_1g52291v3	2.4706	4.88956	44.353	2.74196e-11	1.28515e-09
BRADI_4g25750v3	4.69114	11.4431	44.3385	2.76236e-11	1.29159e-09
BRADI_2g24810v3	3.9268	7.90492	44.3055	2.80931e-11	1.31038e-09
BRADI_1g04510v3	8.49115	1.27944	44.2866	2.83653e-11	1.31991e-09
BRADI_1g71580v3	3.26626	1.32918	44.2679	2.86369e-11	1.32935e-09
BRADI_4g33600v3	7.28935	0.246484	44.2108	2.94848e-11	1.36545e-09
BRADI_2g40490v3	1.92242	4.66612	44.1476	3.04523e-11	1.4069e-09
BRADI_1g77075v3	-6.82414	-0.459746	44.0041	3.27689e-11	1.51033e-09
BRADI_5g10460v3	5.9904	2.19877	43.9228	3.41585e-11	1.57064e-09
BRADI_2g47387v3	-1.76152	2.88865	43.8712	3.50714e-11	1.60881e-09
BRADI_5g19660v3	2.65709	4.56531	43.7926	3.6509e-11	1.6708e-09
BRADI_5g08825v3	2.68243	1.5154	43.7555	3.72079e-11	1.69878e-09
BRADI_5g20840v3	-1.49651	5.51554	43.7309	3.7678e-11	1.71304e-09
BRADI_5g22900v3	-5.06863	0.126704	43.7299	3.76967e-11	1.71304e-09
BRADI_1g78340v3	-2.77721	4.59776	43.7252	3.77866e-11	1.71311e-09
BRADI_1g35050v3	2.54066	4.78532	43.6835	3.86015e-11	1.74598e-09
BRADI_2g36770v3	3.66434	6.77458	43.6229	3.98145e-11	1.79665e-09
BRADI_1g68340v3	2.72567	1.56019	43.5797	4.07048e-11	1.83257e-09
BRADI_2g22400v3	-3.25171	6.40919	43.5524	4.1275e-11	1.85393e-09
BRADI_1g60410v3	5.95857	2.18908	43.4961	4.24811e-11	1.9037e-09
BRADI_2g56267v3	2.39508	7.08506	43.3772	4.5142e-11	2.01829e-09
BRADI_4g39197v3	-2.18634	7.24098	43.3396	4.60177e-11	2.05271e-09
BRADI_1g58976v3	-2.389	2.55148	43.244	4.83216e-11	2.14898e-09
BRADI_1g22750v3	-3.1864	4.55489	43.2409	4.83975e-11	2.14898e-09
BRADI_1g61010v3	-4.67063	6.60119	43.2172	4.89875e-11	2.17022e-09
BRADI_5g12120v3	1.58709	8.02732	43.1993	4.94388e-11	2.18522e-09
BRADI_3g27890v3	2.19861	4.31845	43.1816	4.98883e-11	2.20007e-09
BRADI_3g41960v3	-2.54876	2.58795	43.1628	5.03693e-11	2.21256e-09
BRADI_3g32279v3	5.85426	0.885259	43.1616	5.03995e-11	2.21256e-09
BRADI_1g26857v3	1.96136	4.3609	43.1051	5.18775e-11	2.26813e-09
BRADI_5g20770v3	-1.75776	4.31711	43.1043	5.1899e-11	2.26813e-09
BRADI_2g20330v3	8.36519	1.16958	43.0361	5.37398e-11	2.3433e-09
BRADI_2g23220v3	-3.22112	6.52444	43.0284	5.39521e-11	2.34728e-09
BRADI_2g37150v3	-2.30358	3.29492	42.9675	5.56565e-11	2.41601e-09
BRADI_1g51250v3	1.42	4.49027	42.9317	5.66832e-11	2.45509e-09
BRADI_2g07597v3	-2.93857	4.36041	42.8707	5.84803e-11	2.52729e-09
BRADI_1g36420v3	-2.04035	4.06246	42.8398	5.94109e-11	2.5618e-09
BRADI_2g60970v3	-7.22683	5.44835	42.8162	6.01327e-11	2.58717e-09
BRADI_1g28490v3	2.3326	6.1693	42.687	6.42394e-11	2.75775e-09
BRADI_1g45160v3	9.20293	6.76431	42.6375	6.58828e-11	2.82205e-09
BRADI_5g13830v3	8.74817	1.51004	42.4157	7.37939e-11	3.15396e-09
BRADI_1g63290v3	-1.70423	5.29867	42.3371	7.6821e-11	3.27612e-09
BRADI_3g17741v3	4.80761	4.3162	42.2964	7.84361e-11	3.33766e-09
BRADI_4g25880v3	-1.69115	5.76264	42.2079	8.20662e-11	3.48275e-09
BRADI_4g44390v3	2.80558	6.76787	42.2046	8.22048e-11	3.48275e-09
BRADI_4g02231v3	-2.86992	1.57105	42.169	8.37155e-11	3.53903e-09
BRADI_5g12865v3	5.45268	3.88778	42.1254	8.56058e-11	3.61108e-09
BRADI_5g06566v3	2.62235	1.47112	42.115	8.60607e-11	3.62239e-09
BRADI_3g21190v3	1.53037	4.30594	42.1074	8.63976e-11	3.62343e-09
BRADI_3g28520v3	-1.55295	4.11876	42.106	8.64589e-11	3.62343e-09
BRADI_1g07080v3	-1.70845	4.99033	42.0852	8.73825e-11	3.65425e-09
BRADI_5g11230v3	3.14309	5.39927	42.0398	8.94367e-11	3.73211e-09
BRADI_3g19410v3	1.98271	3.39811	42.029	8.99289e-11	3.74459e-09
BRADI_2g18550v3	3.44075	7.73511	41.9786	9.22766e-11	3.83412e-09
BRADI_1g66890v3	1.72098	5.53553	41.8805	9.70232e-11	4.02273e-09
BRADI_4g42530v3	-2.85445	2.83566	41.8649	9.78018e-11	4.04637e-09
BRADI_5g16730v3	1.85469	4.38389	41.8535	9.83733e-11	4.06135e-09
BRADI_3g27600v3	-1.88692	3.49209	41.792	1.01519e-10	4.18232e-09
BRADI_5g10450v3	9.57162	2.25989	41.7315	1.04709e-10	4.30461e-09
BRADI_1g50440v3	3.25916	1.31124	41.7266	1.04969e-10	4.30618e-09
BRADI_3g53790v3	-3.28929	7.64586	41.7091	1.05917e-10	4.33588e-09
BRADI_2g02160v3	-1.53546	3.77847	41.6912	1.06887e-10	4.36639e-09
BRADI_3g34697v3	1.90882	5.12397	41.6571	1.08772e-10	4.43405e-09
BRADI_2g51596v3	5.23535	1.06226	41.6105	1.11393e-10	4.52743e-09
BRADI_1g31161v3	5.01895	1.33557	41.6081	1.11529e-10	4.52743e-09
BRADI_1g69160v3	8.74255	3.55152	41.4767	1.19286e-10	4.82522e-09
BRADI_5g00970v3	-3.91002	1.83267	41.4754	1.19362e-10	4.82522e-09
BRADI_2g49540v3	10.3467	2.98719	41.4306	1.22129e-10	4.92681e-09
BRADI_2g08300v3	5.00027	4.59342	41.205	1.37072e-10	5.51816e-09
BRADI_4g13310v3	1.40068	4.89491	41.1822	1.38677e-10	5.56222e-09
BRADI_3g39440v3	1.46757	4.6071	41.1813	1.3874e-10	5.56222e-09
BRADI_1g60207v3	-1.54056	5.70839	41.1491	1.4105e-10	5.64317e-09
BRADI_2g26660v3	2.03523	3.16624	40.9924	1.5282e-10	6.10148e-09
BRADI_3g09750v3	-2.53469	3.72013	40.9873	1.53222e-10	6.10495e-09
BRADI_2g53260v3	-3.18655	1.68287	40.9306	1.57735e-10	6.2719e-09
BRADI_4g17391v3	8.37775	1.18214	40.8999	1.60231e-10	6.35813e-09
BRADI_3g29620v3	2.91919	2.87413	40.8555	1.63913e-10	6.49097e-09
BRADI_2g14650v3	-2.30732	1.86279	40.7787	1.70482e-10	6.73733e-09
BRADI_2g13600v3	2.30726	4.84641	40.7281	1.74952e-10	6.89993e-09
BRADI_3g56280v3	-1.5943	7.18296	40.6419	1.82839e-10	7.19638e-09
BRADI_2g21300v3	1.5439	5.78767	40.6176	1.85128e-10	7.27171e-09
BRADI_3g27800v3	-1.95319	5.79484	40.5902	1.87748e-10	7.35971e-09
BRADI_2g45520v3	-2.95116	2.61298	40.5731	1.89393e-10	7.40924e-09
BRADI_2g07180v3	-1.47739	4.79898	40.5463	1.9201e-10	7.4965e-09
BRADI_4g14710v3	-2.46129	1.58324	40.5271	1.93904e-10	7.55526e-09
BRADI_1g14760v3	-1.95986	4.64892	40.4893	1.97691e-10	7.68736e-09
BRADI_4g16503v3	2.58383	5.79154	40.413	2.05569e-10	7.97332e-09
BRADI_5g21017v3	1.71994	3.91651	40.4102	2.05867e-10	7.97332e-09
BRADI_2g23860v3	1.54507	3.79605	40.3942	2.07553e-10	8.02261e-09
BRADI_1g06678v3	-2.38194	3.44171	40.3861	2.08417e-10	8.04e-09
BRADI_3g49204v3	-1.37997	5.90769	40.3386	2.13551e-10	8.22171e-09
BRADI_3g44370v3	-2.32102	4.78827	40.2813	2.19905e-10	8.44956e-09
BRADI_2g32627v3	-3.28332	2.1241	40.2359	2.25078e-10	8.63125e-09
BRADI_1g67200v3	-1.58589	5.74429	40.1973	2.29564e-10	8.78592e-09
BRADI_1g18780v3	1.84189	8.13551	40.149	2.35315e-10	8.9883e-09
BRADI_3g34940v3	-3.17792	7.1479	40.0893	2.42609e-10	9.24868e-09
BRADI_2g57410v3	-1.95381	3.93828	40.0783	2.4399e-10	9.2767e-09
BRADI_3g49220v3	1.60246	5.69358	40.0758	2.443e-10	9.2767e-09
BRADI_3g29120v3	-1.77095	5.03235	40.0604	2.46232e-10	9.32048e-09
BRADI_2g04180v3	1.5155	6.66177	40.0589	2.46413e-10	9.32048e-09
BRADI_2g61000v3	-2.30848	7.25795	40.0104	2.52609e-10	9.53624e-09
BRADI_1g34910v3	-2.2506	3.33911	40.003	2.53575e-10	9.55411e-09
BRADI_2g04760v3	2.76249	4.70206	39.9966	2.54402e-10	9.56671e-09
BRADI_4g20750v3	-2.17576	1.51769	39.9736	2.57422e-10	9.66153e-09
BRADI_2g60730v3	3.26742	5.53543	39.9671	2.58274e-10	9.67481e-09
BRADI_2g22460v3	6.5664	4.71408	39.9512	2.60383e-10	9.73501e-09
BRADI_3g53361v3	3.94708	0.443929	39.9306	2.63153e-10	9.81965e-09
BRADI_2g58650v3	-3.90726	0.614719	39.9062	2.6645e-10	9.92358e-09
BRADI_1g45580v3	2.70762	5.27729	39.8814	2.69854e-10	1.00311e-08
BRADI_2g30370v3	-1.61727	5.19769	39.8627	2.7246e-10	1.01086e-08
BRADI_3g48630v3	1.86224	7.16736	39.8453	2.74891e-10	1.01793e-08
BRADI_2g44860v3	-3.38772	3.864	39.79	2.82785e-10	1.04355e-08
BRADI_1g04130v3	-2.47204	7.3233	39.7894	2.82883e-10	1.04355e-08
BRADI_1g36660v3	1.71797	5.20606	39.7402	2.90089e-10	1.0681e-08
BRADI_2g49490v3	-2.51529	3.90052	39.6844	2.98499e-10	1.09698e-08
BRADI_1g44850v3	-1.2971	5.48153	39.662	3.01948e-10	1.10756e-08
BRADI_3g14420v3	-3.26909	2.06841	39.6191	3.08648e-10	1.12797e-08
BRADI_2g20460v3	2.31734	7.03595	39.6189	3.08674e-10	1.12797e-08
BRADI_2g38040v3	-2.29898	1.72679	39.5357	3.22109e-10	1.17334e-08
BRADI_3g50670v3	-1.80213	4.70838	39.5323	3.22679e-10	1.17334e-08
BRADI_5g09650v3	-2.21876	8.35343	39.5309	3.22903e-10	1.17334e-08
BRADI_1g56667v3	-1.27652	6.42191	39.5079	3.26733e-10	1.18503e-08
BRADI_2g21240v3	5.3355	1.6301	39.4923	3.29353e-10	1.19231e-08
BRADI_4g05050v3	2.09139	2.99916	39.4859	3.3044e-10	1.19401e-08
BRADI_1g07457v3	2.3713	2.15204	39.4657	3.33868e-10	1.20416e-08
BRADI_2g58677v3	2.16072	6.58077	39.4097	3.43592e-10	1.23693e-08
BRADI_1g45647v3	2.16275	4.60119	39.3792	3.48991e-10	1.25181e-08
BRADI_1g55825v3	3.7269	1.71424	39.3791	3.49014e-10	1.25181e-08
BRADI_2g07970v3	2.5339	4.30787	39.3732	3.50062e-10	1.25325e-08
BRADI_2g60340v3	-3.12146	5.41247	39.3611	3.52244e-10	1.25874e-08
BRADI_3g29960v3	2.3808	3.23396	39.3162	3.60444e-10	1.28567e-08
BRADI_3g49870v3	-2.12211	3.16289	39.2631	3.70372e-10	1.31866e-08
BRADI_1g45530v3	-1.74695	6.34905	39.2539	3.7213e-10	1.32249e-08
BRADI_2g36790v3	-2.82724	2.76384	39.2478	3.73285e-10	1.32417e-08
BRADI_1g52050v3	-2.16678	2.82775	39.1776	3.8696e-10	1.37018e-08
BRADI_3g54460v3	-1.92174	5.00298	39.1511	3.92244e-10	1.38636e-08
BRADI_1g15030v3	1.88816	6.32704	39.1343	3.95627e-10	1.39577e-08
BRADI_3g59700v3	2.92665	2.11307	39.1028	4.02057e-10	1.41588e-08
BRADI_1g55488v3	-1.59283	4.83017	39.0579	4.11422e-10	1.44561e-08
BRADI_2g20302v3	-3.34287	4.25462	39.0552	4.11989e-10	1.44561e-08
BRADI_1g14845v3	8.27499	1.09018	39.027	4.17979e-10	1.46398e-08
BRADI_1g11120v3	3.98763	1.79797	39.0055	4.22619e-10	1.47757e-08
BRADI_2g34850v3	-2.47921	4.77372	38.9554	4.33591e-10	1.5132e-08
BRADI_1g30020v3	2.4723	1.75234	38.947	4.35465e-10	1.51453e-08
BRADI_1g07070v3	-1.41617	6.49345	38.9467	4.35533e-10	1.51453e-08
BRADI_5g20270v3	8.25077	1.07024	38.9405	4.36922e-10	1.51664e-08
BRADI_2g20550v3	-1.50548	7.76872	38.8858	4.49332e-10	1.55693e-08
BRADI_2g07420v3	3.97076	1.47851	38.857	4.56025e-10	1.57731e-08
BRADI_5g14137v3	-3.35969	0.949511	38.8292	4.62547e-10	1.59702e-08
BRADI_4g42385v3	-1.66447	4.73103	38.765	4.78015e-10	1.6475e-08
BRADI_2g62200v3	-2.76361	4.57234	38.7311	4.86404e-10	1.67344e-08
BRADI_3g60320v3	-2.69806	1.38107	38.7026	4.93558e-10	1.69504e-08
BRADI_1g51830v3	-2.03039	2.26915	38.6478	5.07617e-10	1.74025e-08
BRADI_3g04176v3	-2.79663	3.68196	38.6317	5.11799e-10	1.75149e-08
BRADI_2g06930v3	2.5825	4.32481	38.5586	5.3133e-10	1.81513e-08
BRADI_3g53830v3	-2.11227	3.86468	38.5304	5.39079e-10	1.83586e-08
BRADI_3g32690v3	-1.96362	6.31784	38.5296	5.39292e-10	1.83586e-08
BRADI_3g48070v3	-3.49446	1.84261	38.4265	5.6854e-10	1.93021e-08
BRADI_4g28670v3	-2.79443	5.02738	38.425	5.68997e-10	1.93021e-08
BRADI_5g09517v3	-3.05815	3.40548	38.3606	5.88078e-10	1.99146e-08
BRADI_2g38270v3	1.78191	3.6292	38.2928	6.08856e-10	2.05823e-08
BRADI_3g45930v3	-4.19025	6.24552	38.2403	6.25466e-10	2.1107e-08
BRADI_3g22461v3	2.42962	2.61469	38.1939	6.40508e-10	2.15529e-08
BRADI_2g44467v3	2.29455	2.95303	38.1928	6.40899e-10	2.15529e-08
BRADI_4g12770v3	2.51025	3.15989	38.1543	6.53658e-10	2.19132e-08
BRADI_5g24050v3	-1.18396	5.05232	38.1536	6.53873e-10	2.19132e-08
BRADI_3g02730v3	-2.34151	6.87364	38.1492	6.55377e-10	2.19258e-08
BRADI_3g51250v3	2.23022	6.16561	38.1324	6.61035e-10	2.2077e-08
BRADI_3g46780v3	5.35084	0.45164	38.0661	6.83876e-10	2.28006e-08
BRADI_2g45050v3	7.07864	0.0770785	38.0101	7.03777e-10	2.34238e-08
BRADI_4g42020v3	-1.84134	3.25543	37.998	7.08187e-10	2.35302e-08
BRADI_3g29815v3	-4.08367	-0.248157	37.8922	7.47642e-10	2.47987e-08
BRADI_3g34245v3	-2.10223	5.06583	37.8788	7.52776e-10	2.49264e-08
BRADI_2g58770v3	-1.76103	6.84135	37.873	7.55026e-10	2.49583e-08
BRADI_5g12990v3	-4.75022	1.85268	37.825	7.73832e-10	2.55365e-08
BRADI_1g34825v3	3.23644	4.36765	37.7847	7.89998e-10	2.60257e-08
BRADI_1g33030v3	-2.33357	7.16074	37.7528	8.03008e-10	2.64094e-08
BRADI_1g05610v3	-1.40967	4.67761	37.7287	8.12991e-10	2.66925e-08
BRADI_4g22030v3	2.16975	3.32297	37.7191	8.16993e-10	2.67786e-08
BRADI_3g17722v3	4.99817	3.36324	37.702	8.24198e-10	2.69692e-08
BRADI_1g66270v3	-1.78796	2.61989	37.6892	8.29624e-10	2.71011e-08
BRADI_3g41711v3	-7.01979	-0.314889	37.6832	8.32175e-10	2.71387e-08
BRADI_2g58380v3	-1.61599	6.99022	37.6199	8.59633e-10	2.79871e-08
BRADI_1g64687v3	3.57262	3.67115	37.6004	8.68248e-10	2.82202e-08
BRADI_3g14830v3	-1.5524	5.72585	37.5266	9.01737e-10	2.92597e-08
BRADI_1g72910v3	1.66762	6.49027	37.4549	9.35504e-10	3.03047e-08
BRADI_5g12370v3	-1.87142	4.88929	37.4436	9.40928e-10	3.04296e-08
BRADI_1g76140v3	-1.86172	4.99894	37.3923	9.66037e-10	3.11896e-08
BRADI_2g02070v3	2.02261	4.28163	37.3109	1.00718e-09	3.2464e-08
BRADI_5g16060v3	-2.14199	4.05337	37.2664	1.03044e-09	3.31586e-08
BRADI_4g07590v3	3.08676	1.39184	37.2292	1.05029e-09	3.37413e-08
BRADI_3g34102v3	-1.63438	5.47456	37.223	1.05363e-09	3.37927e-08
BRADI_2g50910v3	5.86504	3.91335	37.2041	1.06388e-09	3.40651e-08
BRADI_3g34660v3	-2.19085	2.53061	37.1987	1.06685e-09	3.41042e-08
BRADI_3g54670v3	1.54653	5.31586	37.1708	1.08225e-09	3.45393e-08
BRADI_4g44540v3	3.05675	1.9806	37.1449	1.09667e-09	3.4942e-08
BRADI_2g53470v3	2.1244	7.41568	37.124	1.10854e-09	3.52624e-08
BRADI_3g34870v3	7.34748	0.300636	37.106	1.1188e-09	3.55305e-08
BRADI_2g00730v3	3.65686	1.20414	37.0794	1.13416e-09	3.59595e-08
BRADI_2g15965v3	1.86966	2.77428	37.0726	1.13811e-09	3.59814e-08
BRADI_5g11950v3	-5.28513	2.6877	37.0718	1.13856e-09	3.59814e-08
BRADI_1g30690v3	-2.10382	4.09404	37.0559	1.1479e-09	3.62176e-08
BRADI_4g14718v3	1.59592	5.33596	37.046	1.15373e-09	3.62545e-08
BRADI_2g34280v3	1.98	4.85338	37.0447	1.15451e-09	3.62545e-08
BRADI_1g32180v3	1.9989	4.64863	37.0444	1.15467e-09	3.62545e-08
BRADI_1g61260v3	-1.58616	6.72833	37.0373	1.1589e-09	3.63084e-08
BRADI_1g69120v3	-1.84838	4.52215	37.0352	1.16013e-09	3.63084e-08
BRADI_1g64050v3	-1.64532	3.60307	37.0003	1.18108e-09	3.69046e-08
BRADI_1g12780v3	-5.20163	-0.394907	36.9785	1.19436e-09	3.72596e-08
BRADI_1g61320v3	5.89544	4.66317	36.9741	1.19707e-09	3.7284e-08
BRADI_5g04640v3	8.02226	0.871046	36.968	1.20083e-09	3.73413e-08
BRADI_2g54970v3	3.30298	2.14306	36.922	1.22949e-09	3.81713e-08
BRADI_2g49057v3	-1.91013	5.85748	36.9101	1.23705e-09	3.83447e-08
BRADI_3g35590v3	-2.45061	7.55802	36.8604	1.26896e-09	3.9271e-08
BRADI_2g49850v3	-1.90121	6.65419	36.7537	1.34035e-09	4.14142e-08
BRADI_3g30457v3	1.4838	6.04015	36.7072	1.37274e-09	4.23477e-08
BRADI_4g02250v3	-2.222	3.12592	36.6927	1.38295e-09	4.25948e-08
BRADI_5g19640v3	2.55596	1.50202	36.6815	1.39094e-09	4.27731e-08
BRADI_2g46690v3	-2.05217	7.25145	36.6157	1.43868e-09	4.41608e-08
BRADI_3g60360v3	3.04735	3.96114	36.6131	1.44062e-09	4.41608e-08
BRADI_4g27650v3	-3.07891	1.54801	36.59	1.45779e-09	4.46166e-08
BRADI_3g46450v3	1.55128	5.10406	36.5697	1.47302e-09	4.50119e-08
BRADI_3g58000v3	1.60286	5.37232	36.5298	1.50353e-09	4.5872e-08
BRADI_2g45757v3	-2.11624	6.34296	36.5081	1.52032e-09	4.63111e-08
BRADI_2g39067v3	-3.49562	0.858821	36.4914	1.53342e-09	4.66371e-08
BRADI_2g41530v3	3.57568	4.75546	36.3735	1.62903e-09	4.94675e-08
BRADI_5g11830v3	-2.68483	1.082	36.3246	1.67042e-09	5.06451e-08
BRADI_4g23850v3	-2.35988	6.91073	36.3151	1.67861e-09	5.08139e-08
BRADI_2g41702v3	-2.38963	3.9389	36.3051	1.68724e-09	5.09955e-08
BRADI_2g58720v3	1.46974	5.87484	36.274	1.71439e-09	5.17357e-08
BRADI_3g13160v3	-2.55367	7.17763	36.2313	1.75236e-09	5.27994e-08
BRADI_5g17210v3	-1.75552	5.23979	36.225	1.75805e-09	5.28886e-08
BRADI_4g16088v3	-2.75192	0.52892	36.1967	1.78369e-09	5.35771e-08
BRADI_1g14350v3	2.41143	5.41688	36.1823	1.79695e-09	5.38918e-08
BRADI_3g37830v3	1.38256	8.14382	36.1761	1.8027e-09	5.39808e-08
BRADI_2g48790v3	9.04488	1.77913	36.1608	1.81693e-09	5.43231e-08
BRADI_5g13660v3	-1.37007	4.63818	36.1563	1.82113e-09	5.4365e-08
BRADI_2g59650v3	-1.60138	6.26795	36.1143	1.8608e-09	5.54638e-08
BRADI_4g15260v3	6.67583	-0.24158	36.0564	1.91691e-09	5.70488e-08
BRADI_1g70330v3	-1.30206	5.4995	36.053	1.92021e-09	5.70594e-08
BRADI_2g54770v3	1.85998	3.43181	36.0122	1.9609e-09	5.81792e-08
BRADI_1g51840v3	1.73214	2.89916	35.9616	2.01248e-09	5.96186e-08
BRADI_3g60981v3	-2.2167	3.20748	35.945	2.02969e-09	6.00368e-08
BRADI_3g15473v3	-1.68313	2.61044	35.8907	2.087e-09	6.1638e-08
BRADI_2g24210v3	-1.59214	7.01411	35.8853	2.09279e-09	6.17149e-08
BRADI_3g50810v3	-2.95765	2.91586	35.8073	2.17826e-09	6.4138e-08
BRADI_3g17313v3	1.78366	3.43895	35.7905	2.19721e-09	6.4598e-08
BRADI_2g03160v3	-2.67677	1.36247	35.7333	2.26262e-09	6.64203e-08
BRADI_4g29243v3	-4.17378	3.85631	35.6952	2.30735e-09	6.76312e-08
BRADI_3g00900v3	3.3449	2.59435	35.6703	2.33703e-09	6.83662e-08
BRADI_3g50390v3	-1.75618	7.23976	35.6682	2.33947e-09	6.83662e-08
BRADI_1g26190v3	-2.19059	4.16072	35.6087	2.41207e-09	7.03817e-08
BRADI_4g27210v3	-2.77066	6.01149	35.5842	2.44264e-09	7.11665e-08
BRADI_2g21400v3	-3.52047	0.261604	35.5745	2.45481e-09	7.1414e-08
BRADI_5g21658v3	1.58855	5.68093	35.5295	2.51219e-09	7.28699e-08
BRADI_2g15751v3	4.33657	2.61743	35.5279	2.51428e-09	7.28699e-08
BRADI_3g41470v3	-1.82729	7.01413	35.5264	2.51612e-09	7.28699e-08
BRADI_1g38090v3	-2.83697	3.32425	35.4738	2.58509e-09	7.47556e-08
BRADI_2g52590v3	-2.08877	3.3622	35.4687	2.59182e-09	7.48389e-08
BRADI_4g36420v3	-1.71407	5.70053	35.4522	2.61388e-09	7.53636e-08
BRADI_3g21140v3	-2.04224	3.62685	35.4485	2.61887e-09	7.53955e-08
BRADI_3g30600v3	-1.68354	5.70809	35.4161	2.66273e-09	7.65447e-08
BRADI_2g38530v3	5.64137	1.41914	35.4126	2.66755e-09	7.65698e-08
BRADI_3g46390v3	1.85841	4.62108	35.3546	2.74816e-09	7.8767e-08
BRADI_5g12340v3	1.77604	2.99377	35.3326	2.77938e-09	7.95292e-08
BRADI_1g42270v3	1.64725	6.8513	35.3301	2.78295e-09	7.95292e-08
BRADI_5g13727v3	1.47328	4.15517	35.3131	2.80738e-09	8.01096e-08
BRADI_4g03450v3	-3.01692	1.10359	35.2981	2.82903e-09	8.06085e-08
BRADI_3g36341v3	1.5777	3.97462	35.2627	2.88105e-09	8.19704e-08
BRADI_3g38550v3	2.88679	2.12863	35.2335	2.92452e-09	8.30855e-08
BRADI_3g28830v3	4.14659	0.939159	35.2252	2.93695e-09	8.33107e-08
BRADI_3g28470v3	1.34378	5.50915	35.2225	2.94104e-09	8.33107e-08
BRADI_5g10950v3	-1.14783	6.02558	35.2148	2.95278e-09	8.35214e-08
BRADI_3g14990v3	2.05322	5.78286	35.1816	3.00349e-09	8.48321e-08
BRADI_3g46460v3	3.5635	2.93802	35.1565	3.0424e-09	8.58064e-08
BRADI_1g72690v3	1.36677	5.13607	35.1398	3.06864e-09	8.64207e-08
BRADI_1g66227v3	2.15518	2.06212	35.1029	3.12742e-09	8.79485e-08
BRADI_3g46100v3	1.29298	6.02823	35.0783	3.16715e-09	8.89369e-08
BRADI_1g34640v3	6.91209	-0.0551248	35.0168	3.26881e-09	9.15588e-08
BRADI_5g12205v3	2.29233	3.86004	35.0161	3.26996e-09	9.15588e-08
BRADI_2g26650v3	-1.58009	6.49714	35.0083	3.283e-09	9.16718e-08
BRADI_5g17080v3	-3.22132	2.05417	35.0081	3.28344e-09	9.16718e-08
BRADI_4g22290v3	10.6679	5.44416	35.0002	3.29677e-09	9.19117e-08
BRADI_2g37370v3	-1.87048	2.11939	34.9709	3.34664e-09	9.31558e-08
BRADI_1g17762v3	-2.20115	3.21064	34.9684	3.351e-09	9.31558e-08
BRADI_2g57730v3	-2.3104	6.05303	34.9623	3.36158e-09	9.33164e-08
BRADI_3g43670v3	-1.51697	4.80308	34.8881	3.49213e-09	9.68019e-08
BRADI_1g60950v3	2.07155	3.54543	34.8743	3.51693e-09	9.73503e-08
BRADI_1g02560v3	-1.6786	3.16481	34.8138	3.62793e-09	1.0028e-07
BRADI_1g36430v3	-2.22812	5.11484	34.8064	3.64177e-09	1.00519e-07
BRADI_1g71430v3	-2.68668	4.12811	34.7577	3.73404e-09	1.0292e-07
BRADI_5g17480v3	-2.13848	5.79465	34.7495	3.74983e-09	1.03208e-07
BRADI_2g40582v3	1.89083	3.2425	34.7455	3.75755e-09	1.03274e-07
BRADI_1g10660v3	-1.73376	7.41934	34.7164	3.81397e-09	1.04676e-07
BRADI_5g23077v3	-2.06852	3.53923	34.7084	3.82966e-09	1.04959e-07
BRADI_3g26385v3	-3.48695	1.41738	34.6724	3.90116e-09	1.06755e-07
BRADI_1g23920v3	-2.76716	2.93298	34.6699	3.90619e-09	1.06755e-07
BRADI_3g02067v3	-1.36697	4.34496	34.6663	3.91343e-09	1.06802e-07
BRADI_3g07010v3	-2.92557	5.04596	34.6181	4.01168e-09	1.09329e-07
BRADI_4g16140v3	1.3838	4.85466	34.6103	4.02765e-09	1.09611e-07
BRADI_3g37680v3	-6.12516	7.08869	34.6006	4.04788e-09	1.10007e-07
BRADI_2g17220v3	1.6022	3.44638	34.5732	4.10513e-09	1.11407e-07
BRADI_4g40605v3	-4.08716	0.0904567	34.5414	4.17275e-09	1.12939e-07
BRADI_4g24650v3	1.87431	10.0879	34.5412	4.17323e-09	1.12939e-07
BRADI_1g70190v3	2.65435	1.70694	34.4412	4.39324e-09	1.18728e-07
BRADI_2g55697v3	-2.79353	0.472751	34.433	4.4117e-09	1.19061e-07
BRADI_1g26260v3	2.65832	3.5542	34.4074	4.47017e-09	1.20471e-07
BRADI_3g19010v3	1.9385	4.15523	34.3812	4.53069e-09	1.21933e-07
BRADI_2g61490v3	2.13461	4.16337	34.3743	4.54692e-09	1.222e-07
BRADI_5g25236v3	-2.60225	1.81368	34.3679	4.56181e-09	1.22431e-07
BRADI_3g36820v3	-3.40353	3.73535	34.3492	4.60598e-09	1.23422e-07
BRADI_1g17050v3	-2.21228	2.41174	34.3468	4.61147e-09	1.23422e-07
BRADI_3g02130v3	-4.69675	4.42505	34.3414	4.62435e-09	1.23596e-07
BRADI_3g41987v3	-4.00111	1.44284	34.3299	4.65181e-09	1.24159e-07
BRADI_3g01110v3	-2.33089	5.67477	34.2874	4.75443e-09	1.26724e-07
BRADI_3g33690v3	1.50034	6.4597	34.2368	4.87967e-09	1.29884e-07
BRADI_2g43100v3	-1.72576	3.36267	34.2199	4.9224e-09	1.30841e-07
BRADI_4g40727v3	-1.39185	4.64324	34.1984	4.97687e-09	1.32108e-07
BRADI_2g45410v3	9.25424	1.97026	34.1705	5.04882e-09	1.33835e-07
BRADI_3g10597v3	-3.48388	0.543104	34.1462	5.11241e-09	1.35336e-07
BRADI_1g22540v3	-2.96307	0.263174	34.1386	5.13232e-09	1.35678e-07
BRADI_2g01387v3	1.56947	5.07193	34.1278	5.16091e-09	1.36248e-07
BRADI_4g44530v3	2.92892	1.17586	34.0815	5.28512e-09	1.39338e-07
BRADI_1g67990v3	-2.64806	7.51921	34.0707	5.31451e-09	1.39922e-07
BRADI_4g13760v3	6.49999	3.34921	34.052	5.36593e-09	1.41085e-07
BRADI_4g42360v3	-1.53902	4.65647	34.0277	5.43322e-09	1.42661e-07
BRADI_1g62370v3	-1.40611	3.66723	33.9868	5.54859e-09	1.45493e-07
BRADI_3g56670v3	1.50132	4.54746	33.871	5.88904e-09	1.54079e-07
BRADI_2g07310v3	1.47474	4.72403	33.87	5.89191e-09	1.54079e-07
BRADI_3g48860v3	1.72073	3.19993	33.8573	5.93063e-09	1.54883e-07
BRADI_5g21870v3	-2.0377	3.94955	33.8023	6.10078e-09	1.59046e-07
BRADI_2g61190v3	2.45054	4.44266	33.8005	6.10645e-09	1.59046e-07
BRADI_4g20620v3	2.13166	4.52462	33.78	6.17116e-09	1.60516e-07
BRADI_3g07385v3	-2.06456	4.98029	33.7627	6.22598e-09	1.61725e-07
BRADI_3g41110v3	9.6839	2.36535	33.7547	6.25178e-09	1.62179e-07
BRADI_2g50990v3	-1.30371	7.25181	33.7509	6.26407e-09	1.6228e-07
BRADI_3g46247v3	-2.29379	7.56433	33.7384	6.3043e-09	1.63105e-07
BRADI_1g67740v3	-1.34601	5.29957	33.7181	6.37048e-09	1.64598e-07
BRADI_2g47000v3	1.66058	5.10151	33.7107	6.39472e-09	1.65004e-07
BRADI_1g26220v3	4.86693	0.0667852	33.706	6.41037e-09	1.65188e-07
BRADI_3g22560v3	-2.52189	3.3715	33.6981	6.43636e-09	1.65638e-07
BRADI_2g19970v3	2.0403	3.9089	33.6904	6.46204e-09	1.66079e-07
BRADI_3g58880v3	4.87319	0.070827	33.66	6.56368e-09	1.68468e-07
BRADI_1g55710v3	3.67678	2.64898	33.6434	6.62e-09	1.69689e-07
BRADI_5g01240v3	1.50377	3.44685	33.6054	6.75054e-09	1.72807e-07
BRADI_3g22707v3	1.6182	3.09192	33.5645	6.89395e-09	1.76245e-07
BRADI_3g57510v3	2.03614	5.39146	33.5608	6.90697e-09	1.76346e-07
BRADI_1g35990v3	2.74687	1.84323	33.5414	6.97643e-09	1.77885e-07
BRADI_3g52660v3	1.72385	7.55421	33.536	6.99565e-09	1.78141e-07
BRADI_1g24820v3	-2.18058	4.08183	33.5222	7.04534e-09	1.79172e-07
BRADI_4g25630v3	-1.61971	6.08305	33.5069	7.10118e-09	1.80251e-07
BRADI_3g02410v3	-1.58069	7.56185	33.5055	7.10639e-09	1.80251e-07
BRADI_2g19230v3	1.43888	6.3336	33.4745	7.22034e-09	1.82903e-07
BRADI_5g08600v3	-2.80299	4.15129	33.4633	7.262e-09	1.83718e-07
BRADI_2g21250v3	1.49643	5.64623	33.4486	7.31726e-09	1.84875e-07
BRADI_5g12430v3	-1.60799	7.69552	33.4351	7.36833e-09	1.85923e-07
BRADI_1g69571v3	-2.21031	2.11991	33.3739	7.60385e-09	1.91617e-07
BRADI_3g53907v3	-2.31144	8.81504	33.3494	7.70033e-09	1.93719e-07
BRADI_1g55610v3	5.80572	5.93603	33.3476	7.70723e-09	1.93719e-07
BRADI_5g18780v3	-2.43943	1.26022	33.337	7.74955e-09	1.94531e-07
BRADI_3g57820v3	-1.40875	6.95926	33.3293	7.77999e-09	1.95043e-07
BRADI_5g24290v3	1.44134	5.92079	33.2901	7.93855e-09	1.98739e-07
BRADI_2g02230v3	-1.62443	7.27708	33.2878	7.94792e-09	1.98739e-07
BRADI_1g60810v3	3.03859	1.12545	33.2781	7.98788e-09	1.99481e-07
BRADI_1g68950v3	1.61565	4.40976	33.2474	8.115e-09	2.02395e-07
BRADI_1g15170v3	-1.84628	7.05218	33.224	8.21324e-09	2.04583e-07
BRADI_1g64010v3	-1.49779	7.10078	33.1936	8.3423e-09	2.07531e-07
BRADI_3g31850v3	-2.04522	2.75526	33.177	8.41418e-09	2.09051e-07
BRADI_3g29810v3	-2.91656	8.50701	33.1054	8.7294e-09	2.16605e-07
BRADI_4g05300v3	-1.71229	4.80979	33.0606	8.93285e-09	2.2137e-07
BRADI_1g25320v3	-2.54969	3.35847	33.054	8.96366e-09	2.21851e-07
BRADI_1g23390v3	-3.51456	0.459247	33.0421	9.01851e-09	2.22924e-07
BRADI_3g33047v3	-1.56861	4.97545	32.9755	9.3329e-09	2.30402e-07
BRADI_3g59760v3	2.54772	5.0001	32.9701	9.35889e-09	2.3075e-07
BRADI_2g46830v3	1.55435	2.84639	32.9536	9.43851e-09	2.32201e-07
BRADI_1g07140v3	-2.31939	8.08248	32.9527	9.44303e-09	2.32201e-07
BRADI_5g19970v3	-1.58295	7.4908	32.9505	9.45367e-09	2.32201e-07
BRADI_4g16480v3	-2.04761	5.27755	32.9456	9.47734e-09	2.32488e-07
BRADI_3g48562v3	2.677	1.34806	32.9391	9.50927e-09	2.32977e-07
BRADI_2g30590v3	-2.18948	2.76932	32.9064	9.67033e-09	2.36624e-07
BRADI_3g52690v3	-2.23117	8.40321	32.8939	9.73267e-09	2.3785e-07
BRADI_2g51592v3	5.24589	4.60827	32.8795	9.8052e-09	2.39321e-07
BRADI_1g61390v3	-2.12611	1.753	32.8448	9.98174e-09	2.43324e-07
BRADI_4g16081v3	-4.97101	-0.57258	32.8246	1.00861e-08	2.45533e-07
BRADI_2g01980v3	3.086	4.58769	32.8224	1.00977e-08	2.45533e-07
BRADI_1g20500v3	2.1099	3.01248	32.7627	1.04125e-08	2.52871e-07
BRADI_4g29380v3	1.98738	1.97295	32.7109	1.06934e-08	2.59369e-07
BRADI_5g23190v3	-2.19409	5.19776	32.7024	1.07406e-08	2.60187e-07
BRADI_4g09230v3	2.08341	6.43127	32.6928	1.07937e-08	2.61149e-07
BRADI_2g22150v3	-1.43424	5.76006	32.6853	1.08352e-08	2.61826e-07
BRADI_4g36945v3	-3.42368	0.969078	32.6703	1.09195e-08	2.63534e-07
BRADI_2g59210v3	-1.58206	7.52042	32.6248	1.11781e-08	2.69441e-07
BRADI_2g33210v3	-1.89923	3.30983	32.6153	1.12329e-08	2.70425e-07
BRADI_1g70690v3	-1.59305	4.01187	32.5205	1.17943e-08	2.83455e-07
BRADI_1g18040v3	-1.35582	3.33776	32.519	1.18033e-08	2.83455e-07
BRADI_4g31990v3	-1.16679	4.81528	32.4418	1.22815e-08	2.94561e-07
BRADI_1g71280v3	6.10282	1.11399	32.4395	1.22961e-08	2.94561e-07
BRADI_1g28580v3	-1.59421	4.42254	32.4346	1.2327e-08	2.94936e-07
BRADI_2g14970v3	6.09886	3.71706	32.4282	1.2368e-08	2.95553e-07
BRADI_4g28075v3	7.75088	0.641823	32.4105	1.2481e-08	2.97887e-07
BRADI_1g72963v3	1.5498	4.04755	32.4023	1.25337e-08	2.98777e-07
BRADI_3g26640v3	2.39973	2.26444	32.3885	1.26233e-08	3.00542e-07
BRADI_2g23740v3	-1.94191	4.09425	32.3171	1.30957e-08	3.11407e-07
BRADI_3g08790v3	5.01985	0.173967	32.292	1.3266e-08	3.15071e-07
BRADI_2g06550v3	2.40013	2.52356	32.2678	1.34324e-08	3.18633e-07
BRADI_3g38580v3	-1.7377	6.3074	32.2429	1.36056e-08	3.22348e-07
BRADI_5g21930v3	1.59444	4.65837	32.2362	1.36523e-08	3.2306e-07
BRADI_2g49000v3	2.58977	8.332	32.1282	1.44331e-08	3.41119e-07
BRADI_4g18820v3	3.08562	2.69226	32.0925	1.47e-08	3.47006e-07
BRADI_3g57080v3	1.41318	6.24953	32.0898	1.47206e-08	3.4707e-07
BRADI_1g53936v3	-2.48869	1.3041	32.0691	1.48787e-08	3.50371e-07
BRADI_3g32160v3	1.34556	4.37027	32.0529	1.50029e-08	3.52867e-07
BRADI_1g67110v3	-1.48446	2.92832	32.0488	1.50351e-08	3.53197e-07
BRADI_5g17347v3	-1.64959	2.78087	32.0311	1.51722e-08	3.55988e-07
BRADI_4g32980v3	2.91669	3.34687	32.0265	1.52083e-08	3.56404e-07
BRADI_2g04597v3	-2.17794	2.52241	32.0209	1.52523e-08	3.57003e-07
BRADI_1g05910v3	10.9713	3.58416	32.0056	1.53726e-08	3.59385e-07
BRADI_1g75290v3	-1.89924	7.9836	31.9057	1.61845e-08	3.77742e-07
BRADI_4g26040v3	-2.94357	2.57717	31.9042	1.61967e-08	3.77742e-07
BRADI_2g05130v3	-1.39721	5.13368	31.8715	1.64715e-08	3.83474e-07
BRADI_1g46480v3	-1.54911	4.49942	31.8703	1.6482e-08	3.83474e-07
BRADI_1g25693v3	-1.83087	3.9948	31.8671	1.65089e-08	3.83639e-07
BRADI_4g16830v3	-1.67269	7.01842	31.8451	1.66967e-08	3.87539e-07
BRADI_1g32060v3	-2.3825	1.53816	31.7817	1.72506e-08	3.99918e-07
BRADI_1g34511v3	3.80995	0.668776	31.7475	1.75576e-08	4.06549e-07
BRADI_5g09400v3	-3.56268	-0.0780609	31.7445	1.75847e-08	4.06691e-07
BRADI_1g18020v3	1.4738	6.69358	31.7264	1.77489e-08	4.09998e-07
BRADI_1g56880v3	-1.48565	4.71071	31.6944	1.8044e-08	4.16321e-07
BRADI_2g09200v3	-2.07364	7.00341	31.6867	1.81156e-08	4.17476e-07
BRADI_1g17200v3	-2.75665	5.73756	31.6822	1.81576e-08	4.17948e-07
BRADI_4g36060v3	4.54098	4.3696	31.6616	1.83519e-08	4.21919e-07
BRADI_2g09145v3	2.23149	6.40114	31.6208	1.87413e-08	4.30362e-07
BRADI_1g63610v3	2.96954	7.63909	31.5944	1.89977e-08	4.35734e-07
BRADI_2g39830v3	-5.86804	0.15569	31.5666	1.92717e-08	4.41342e-07
BRADI_2g05760v3	1.38794	7.21632	31.565	1.92877e-08	4.41342e-07
BRADI_1g13980v3	-1.95303	6.19036	31.5499	1.94382e-08	4.44262e-07
BRADI_3g00184v3	-2.03532	3.29618	31.542	1.9517e-08	4.4554e-07
BRADI_4g13580v3	-2.4101	2.306	31.5314	1.96245e-08	4.47467e-07
BRADI_2g26280v3	-3.25686	5.7726	31.4859	2.00889e-08	4.57518e-07
BRADI_3g09597v3	-3.74902	1.77754	31.4752	2.02004e-08	4.59518e-07
BRADI_2g33160v3	-4.18259	0.456601	31.4435	2.05334e-08	4.66546e-07
BRADI_1g30160v3	-2.0118	4.91229	31.4375	2.05962e-08	4.66902e-07
BRADI_1g67730v3	-3.00008	4.829	31.4374	2.05972e-08	4.66902e-07
BRADI_3g34030v3	2.06	2.94767	31.4322	2.06529e-08	4.67619e-07
BRADI_5g15830v3	1.92836	7.24962	31.4077	2.09147e-08	4.72778e-07
BRADI_4g31310v3	2.81484	7.78986	31.4064	2.09295e-08	4.72778e-07
BRADI_3g22515v3	9.3478	2.05673	31.402	2.09769e-08	4.73298e-07
BRADI_3g58020v3	-2.00368	6.8035	31.3859	2.11512e-08	4.76676e-07
BRADI_2g53050v3	1.79332	5.22215	31.3821	2.11922e-08	4.77046e-07
BRADI_1g14750v3	-1.47179	4.64663	31.3746	2.1275e-08	4.78355e-07
BRADI_3g43910v3	-1.72635	3.91699	31.3655	2.1374e-08	4.80025e-07
BRADI_3g27590v3	-5.00145	0.541435	31.3626	2.14064e-08	4.80197e-07
BRADI_2g03840v3	2.58945	4.28954	31.3478	2.15701e-08	4.82765e-07
BRADI_5g27130v3	3.69611	3.02745	31.3478	2.15707e-08	4.82765e-07
BRADI_1g59690v3	-1.98937	3.04534	31.3345	2.17186e-08	4.85515e-07
BRADI_1g02400v3	-1.50699	6.17832	31.3314	2.17538e-08	4.85742e-07
BRADI_1g71425v3	-1.63327	6.2938	31.2995	2.21141e-08	4.93103e-07
BRADI_4g00775v3	2.52387	2.54003	31.2977	2.21342e-08	4.93103e-07
BRADI_2g25150v3	-2.03951	3.07135	31.295	2.21655e-08	4.93234e-07
BRADI_3g05820v3	1.3578	3.97876	31.2772	2.23686e-08	4.97182e-07
BRADI_1g72790v3	-3.08464	8.50963	31.2348	2.28632e-08	5.07595e-07
BRADI_2g15350v3	1.66262	3.98419	31.1955	2.33304e-08	5.17375e-07
BRADI_2g49110v3	-2.61785	4.32803	31.1759	2.35669e-08	5.22023e-07
BRADI_3g58140v3	-1.67302	6.73518	31.1199	2.42576e-08	5.3671e-07
BRADI_3g05767v3	-2.23474	4.53217	31.0831	2.47215e-08	5.4635e-07
BRADI_1g65400v3	1.72601	2.4354	31.074	2.48382e-08	5.48305e-07
BRADI_4g36106v3	2.70286	2.21538	31.062	2.49912e-08	5.5091e-07
BRADI_1g18320v3	-1.40629	7.50583	31.0603	2.5013e-08	5.5091e-07
BRADI_1g07840v3	2.052	4.09933	31.0538	2.50973e-08	5.5214e-07
BRADI_1g75760v3	-2.07815	1.22494	30.9952	2.58663e-08	5.67807e-07
BRADI_1g24220v3	-2.05882	4.40111	30.9951	2.58679e-08	5.67807e-07
BRADI_4g11590v3	-1.57294	5.74062	30.9917	2.59128e-08	5.68149e-07
BRADI_1g17040v3	-3.80196	2.18287	30.988	2.59625e-08	5.68596e-07
BRADI_2g53800v3	1.97664	1.61786	30.985	2.60027e-08	5.68834e-07
BRADI_5g01135v3	-4.22414	3.73803	30.9714	2.61859e-08	5.72196e-07
BRADI_2g17170v3	3.2501	4.03765	30.9267	2.67953e-08	5.84855e-07
BRADI_5g10590v3	1.71818	3.13281	30.9241	2.68319e-08	5.84996e-07
BRADI_2g44942v3	1.3255	3.97529	30.8727	2.75523e-08	5.99942e-07
BRADI_2g41560v3	-2.02312	6.05267	30.8708	2.75793e-08	5.99942e-07
BRADI_1g13590v3	-1.37803	3.80955	30.8086	2.84771e-08	6.18527e-07
BRADI_1g70830v3	-2.54287	1.27056	30.8072	2.84974e-08	6.18527e-07
BRADI_1g03500v3	-2.16625	3.35172	30.7954	2.8671e-08	6.216e-07
BRADI_1g22180v3	1.35142	5.49967	30.7802	2.88977e-08	6.25815e-07
BRADI_2g14750v3	-1.70455	4.13325	30.7769	2.89469e-08	6.26181e-07
BRADI_2g36788v3	3.09893	2.47701	30.7697	2.90537e-08	6.27792e-07
BRADI_4g28160v3	-1.58073	7.80114	30.7461	2.94102e-08	6.34789e-07
BRADI_2g41590v3	1.75248	8.62506	30.7352	2.95744e-08	6.37625e-07
BRADI_1g71330v3	1.67251	3.11148	30.6848	3.03534e-08	6.53694e-07
BRADI_2g43040v3	3.54281	3.27362	30.6821	3.03957e-08	6.53879e-07
BRADI_1g31998v3	4.1714	1.23699	30.6767	3.04807e-08	6.54981e-07
BRADI_2g15900v3	-1.47305	7.57301	30.6255	3.12959e-08	6.71753e-07
BRADI_3g39790v3	-1.53637	5.2294	30.5866	3.19283e-08	6.84572e-07
BRADI_1g19810v3	-1.47033	6.13393	30.5788	3.20583e-08	6.85904e-07
BRADI_4g32610v3	-2.00634	1.47195	30.5786	3.20612e-08	6.85904e-07
BRADI_1g19140v3	-1.22425	6.84637	30.5538	3.24738e-08	6.93966e-07
BRADI_3g41800v3	-2.28388	5.40808	30.5403	3.27005e-08	6.96406e-07
BRADI_4g20980v3	-1.87449	4.27795	30.5396	3.27128e-08	6.96406e-07
BRADI_1g43310v3	-2.35807	4.82207	30.5393	3.27169e-08	6.96406e-07
BRADI_3g30127v3	-1.80446	5.12203	30.5384	3.27315e-08	6.96406e-07
BRADI_1g07310v3	3.70075	0.250544	30.5282	3.29051e-08	6.99332e-07
BRADI_2g39240v3	1.63865	4.20319	30.5138	3.31505e-08	7.03777e-07
BRADI_3g36140v3	2.2606	6.52179	30.5026	3.33424e-08	7.06445e-07
BRADI_2g57860v3	-1.59536	5.34107	30.5022	3.3349e-08	7.06445e-07
BRADI_4g37185v3	-1.63148	4.15051	30.4694	3.39183e-08	7.17722e-07
BRADI_3g03450v3	2.17408	3.1238	30.4589	3.41014e-08	7.20811e-07
BRADI_4g32580v3	-5.02649	2.45391	30.4522	3.42188e-08	7.22505e-07
BRADI_2g15840v3	8.13677	0.975551	30.4491	3.42741e-08	7.22884e-07
BRADI_3g07130v3	1.6439	8.52549	30.4377	3.44764e-08	7.26363e-07
BRADI_1g25530v3	-6.08894	3.06626	30.4336	3.4549e-08	7.27102e-07
BRADI_3g59057v3	-2.01105	6.16012	30.4128	3.49212e-08	7.34141e-07
BRADI_3g03080v3	-1.5723	4.18668	30.4057	3.50496e-08	7.36041e-07
BRADI_1g33860v3	1.89482	5.92392	30.3751	3.56066e-08	7.46405e-07
BRADI_1g78410v3	2.02177	3.24734	30.3744	3.562e-08	7.46405e-07
BRADI_3g10350v3	-2.21174	8.53339	30.3166	3.66967e-08	7.68138e-07
BRADI_3g11060v3	-1.94001	5.60675	30.309	3.68413e-08	7.70333e-07
BRADI_1g04300v3	-1.66084	7.58065	30.2888	3.72274e-08	7.77248e-07
BRADI_5g11790v3	1.911	3.62899	30.2875	3.72521e-08	7.77248e-07
BRADI_4g30710v3	-1.4541	6.33829	30.2703	3.75838e-08	7.83326e-07
BRADI_2g17982v3	3.42776	3.69673	30.242	3.81365e-08	7.93993e-07
BRADI_1g60030v3	-2.75449	5.4732	30.2016	3.89393e-08	8.09837e-07
BRADI_1g09420v3	-1.70297	3.8563	30.1774	3.94283e-08	8.1913e-07
BRADI_1g14810v3	-3.12396	4.35438	30.1571	3.98416e-08	8.2683e-07
BRADI_1g66913v3	2.097	4.2674	30.1414	4.01674e-08	8.32702e-07
BRADI_2g57952v3	-1.29695	4.0457	30.1141	4.07369e-08	8.43605e-07
BRADI_4g07340v3	8.09067	0.933711	30.0844	4.13645e-08	8.55689e-07
BRADI_1g28530v3	-1.59461	7.28904	30.0819	4.1417e-08	8.55863e-07
BRADI_2g54400v3	2.43792	5.82748	30.0388	4.2349e-08	8.74192e-07
BRADI_1g36490v3	-1.65859	5.3709	30.0348	4.24358e-08	8.75052e-07
BRADI_1g68887v3	-6.7666	-0.522791	30.0078	4.30309e-08	8.86381e-07
BRADI_4g09417v3	3.4069	6.73114	29.9951	4.33128e-08	8.91243e-07
BRADI_2g12310v3	-2.42328	8.15247	29.9712	4.38507e-08	9.01355e-07
BRADI_3g16880v3	-1.76387	5.57137	29.9369	4.46333e-08	9.16471e-07
BRADI_2g62400v3	1.65196	5.72997	29.9219	4.49797e-08	9.22606e-07
BRADI_3g58107v3	-1.18044	3.92149	29.9151	4.51393e-08	9.24904e-07
BRADI_2g26090v3	-1.61768	4.82509	29.905	4.53743e-08	9.28737e-07
BRADI_1g25600v3	2.58856	4.52282	29.8982	4.55336e-08	9.31016e-07
BRADI_4g22080v3	1.62395	2.97427	29.8804	4.59524e-08	9.38419e-07
BRADI_3g15087v3	-2.8719	0.199464	29.8788	4.59924e-08	9.38419e-07
BRADI_3g12930v3	-1.62601	4.38419	29.8725	4.614e-08	9.40442e-07
BRADI_1g28620v3	1.99708	5.25271	29.8572	4.65076e-08	9.46939e-07
BRADI_5g22710v3	-1.11928	4.99092	29.8102	4.76487e-08	9.69156e-07
BRADI_1g61470v3	4.04257	2.80523	29.7982	4.79439e-08	9.74139e-07
BRADI_1g63600v3	3.61251	3.61671	29.7939	4.80491e-08	9.75256e-07
BRADI_1g31780v3	-1.65528	6.18052	29.7684	4.86854e-08	9.86285e-07
BRADI_2g25417v3	-1.50834	4.16567	29.7681	4.86941e-08	9.86285e-07
BRADI_1g64130v3	-1.47519	8.09937	29.7559	4.90007e-08	9.9146e-07
BRADI_1g48147v3	-1.37818	3.29542	29.7507	4.91332e-08	9.93105e-07
BRADI_3g16180v3	-1.79092	7.80619	29.7471	4.9225e-08	9.93324e-07
BRADI_1g13440v3	-1.26403	3.71502	29.7462	4.92464e-08	9.93324e-07
BRADI_3g46650v3	1.82269	4.96293	29.7412	4.93737e-08	9.94857e-07
BRADI_1g28627v3	1.22858	5.41053	29.7088	5.02069e-08	1.0106e-06
BRADI_1g07560v3	-2.05581	5.88858	29.6904	5.06861e-08	1.01919e-06
BRADI_1g11490v3	-1.65987	6.42862	29.6658	5.13323e-08	1.03111e-06
BRADI_4g03820v3	-1.7963	6.43488	29.6496	5.1764e-08	1.03871e-06
BRADI_3g06340v3	-3.73703	2.75273	29.6364	5.21158e-08	1.04468e-06
BRADI_3g26820v3	-1.95826	2.77605	29.6191	5.25847e-08	1.053e-06
BRADI_1g11920v3	4.35584	2.38765	29.5925	5.33118e-08	1.06646e-06
BRADI_2g04330v3	3.66823	0.237464	29.5531	5.44044e-08	1.08719e-06
BRADI_1g24500v3	-2.04023	5.293	29.5311	5.50256e-08	1.09847e-06
BRADI_4g35000v3	-1.05285	5.28135	29.5012	5.58831e-08	1.11445e-06
BRADI_3g35210v3	-1.74033	5.1133	29.4853	5.6341e-08	1.12242e-06
BRADI_4g40890v3	2.35463	1.01813	29.4584	5.71299e-08	1.13697e-06
BRADI_1g58580v3	6.82664	-0.118688	29.4385	5.77189e-08	1.14752e-06
BRADI_1g57552v3	-2.50373	1.64671	29.4172	5.83562e-08	1.159e-06
BRADI_1g42397v3	-1.68552	4.77176	29.399	5.89071e-08	1.16875e-06
BRADI_5g02165v3	2.72501	1.22863	29.348	6.04787e-08	1.1987e-06
BRADI_3g15690v3	-2.73679	0.213237	29.3436	6.0617e-08	1.20022e-06
BRADI_3g12577v3	-3.17037	3.92772	29.3382	6.07849e-08	1.20231e-06
BRADI_2g02822v3	1.65907	7.43894	29.3326	6.09624e-08	1.2046e-06
BRADI_3g30757v3	-1.54588	5.63168	29.3092	6.17013e-08	1.21796e-06
BRADI_5g10027v3	1.51456	7.64685	29.305	6.18361e-08	1.21938e-06
BRADI_4g40170v3	1.71005	6.30462	29.2823	6.2566e-08	1.23252e-06
BRADI_1g30710v3	-3.1301	1.05475	29.255	6.34535e-08	1.24873e-06
BRADI_1g38280v3	-1.59436	5.21704	29.242	6.38778e-08	1.25581e-06
BRADI_3g05800v3	-1.6538	4.09743	29.2321	6.42081e-08	1.26039e-06
BRADI_4g16970v3	-1.59383	5.0102	29.2311	6.42405e-08	1.26039e-06
BRADI_2g21918v3	1.21487	3.64447	29.1993	6.53023e-08	1.27993e-06
BRADI_1g77047v3	-2.20899	7.13461	29.1877	6.56939e-08	1.2863e-06
BRADI_2g51150v3	1.44702	5.5082	29.1808	6.59288e-08	1.28836e-06
BRADI_1g24110v3	-1.54023	7.06472	29.1807	6.59317e-08	1.28836e-06
BRADI_3g46040v3	-3.23532	0.0589827	29.177	6.60601e-08	1.28957e-06
BRADI_1g64630v3	2.64005	4.86506	29.1265	6.78046e-08	1.32229e-06
BRADI_1g66893v3	1.8898	3.24419	29.1128	6.82854e-08	1.33033e-06
BRADI_1g22930v3	-3.71402	1.67273	29.1104	6.83677e-08	1.3306e-06
BRADI_1g71190v3	1.61994	4.06037	29.1038	6.86029e-08	1.33384e-06
BRADI_2g56750v3	-5.14841	5.45966	29.095	6.89151e-08	1.33827e-06
BRADI_1g11720v3	-1.28866	5.92031	29.0935	6.89686e-08	1.33827e-06
BRADI_3g39980v3	-2.82272	3.4871	29.089	6.91296e-08	1.34005e-06
BRADI_3g53650v3	-2.71485	4.23967	29.0554	7.03373e-08	1.3621e-06
BRADI_2g37240v3	-1.83838	8.51404	29.0529	7.04288e-08	1.36251e-06
BRADI_3g19893v3	1.95685	4.27534	29.0396	7.09136e-08	1.37053e-06
BRADI_3g56060v3	-1.8871	6.60921	29.0269	7.13803e-08	1.37817e-06
BRADI_3g55230v3	1.6306	3.56697	29.0022	7.22974e-08	1.39449e-06
BRADI_1g43410v3	2.00631	5.69492	28.9933	7.26285e-08	1.39949e-06
BRADI_4g39987v3	-1.55375	6.33328	28.9734	7.33771e-08	1.41251e-06
BRADI_4g32110v3	-3.09113	0.510791	28.9564	7.40257e-08	1.42358e-06
BRADI_2g47790v3	-2.41986	1.70994	28.9444	7.44872e-08	1.43104e-06
BRADI_4g38490v3	-1.39371	5.94154	28.9216	7.53691e-08	1.44566e-06
BRADI_4g40155v3	-3.22421	-0.143386	28.9208	7.53974e-08	1.44566e-06
BRADI_2g33070v3	-1.37962	6.09621	28.9079	7.59019e-08	1.4539e-06
BRADI_3g35340v3	1.45426	4.99812	28.8926	7.65056e-08	1.46402e-06
BRADI_2g06180v3	3.75824	1.27951	28.8626	7.76996e-08	1.4854e-06
BRADI_1g07441v3	1.43811	7.98107	28.8579	7.78857e-08	1.4873e-06
BRADI_4g27850v3	1.44838	4.88618	28.8552	7.79958e-08	1.4873e-06
BRADI_3g38591v3	1.36712	3.63885	28.8544	7.80289e-08	1.4873e-06
BRADI_3g33030v3	-2.56239	1.36909	28.8338	7.88629e-08	1.50172e-06
BRADI_3g14960v3	1.50037	9.1105	28.8216	7.93609e-08	1.50972e-06
BRADI_2g25550v3	-2.98076	8.44252	28.8018	8.01766e-08	1.52375e-06
BRADI_1g01800v3	-1.88845	8.2099	28.7959	8.04212e-08	1.5269e-06
BRADI_3g54380v3	-1.71692	4.00355	28.7911	8.06217e-08	1.52921e-06
BRADI_2g18940v3	-2.18052	3.66254	28.7777	8.11806e-08	1.53831e-06
BRADI_1g70920v3	-1.03809	6.11149	28.757	8.20539e-08	1.55334e-06
BRADI_4g44145v3	2.56746	2.3265	28.7488	8.24028e-08	1.55842e-06
BRADI_2g12204v3	3.70135	4.11761	28.7397	8.27888e-08	1.5642e-06
BRADI_5g26023v3	3.48793	4.60537	28.7359	8.29538e-08	1.56579e-06
BRADI_1g11837v3	-1.29067	6.80051	28.6805	8.53589e-08	1.60962e-06
BRADI_1g28130v3	-1.7515	1.72497	28.6577	8.63715e-08	1.62714e-06
BRADI_4g02380v3	1.89401	6.46623	28.6241	8.78834e-08	1.65401e-06
BRADI_2g15340v3	2.26752	4.55022	28.5974	8.90999e-08	1.67529e-06
BRADI_4g11300v3	-1.71902	5.03758	28.5868	8.95909e-08	1.68289e-06
BRADI_3g37760v3	1.53021	3.23585	28.5777	9.00106e-08	1.68913e-06
BRADI_3g40180v3	1.12881	6.20834	28.5753	9.01231e-08	1.68961e-06
BRADI_3g16010v3	-1.48642	4.78408	28.5622	9.07362e-08	1.69947e-06
BRADI_4g04210v3	7.47491	0.412037	28.5362	9.19623e-08	1.72077e-06
BRADI_4g32300v3	-4.07525	0.969043	28.5252	9.24854e-08	1.72889e-06
BRADI_4g06700v3	-2.01075	2.24587	28.5072	9.3353e-08	1.74343e-06
BRADI_3g31820v3	-2.29619	2.98334	28.5029	9.3559e-08	1.7456e-06
BRADI_2g26240v3	-1.54853	7.3734	28.4977	9.38119e-08	1.74863e-06
BRADI_3g59920v3	1.37115	3.86655	28.4801	9.4666e-08	1.76097e-06
BRADI_1g53100v3	-1.38812	5.81292	28.479	9.47206e-08	1.76097e-06
BRADI_4g04270v3	-1.36952	7.354	28.4785	9.47461e-08	1.76097e-06
BRADI_3g20101v3	2.07786	5.32704	28.4749	9.4923e-08	1.76257e-06
BRADI_2g40790v3	-4.83286	6.14183	28.4622	9.55453e-08	1.77243e-06
BRADI_3g38770v3	-3.65834	2.79214	28.4595	9.56812e-08	1.77326e-06
BRADI_3g60920v3	-1.80483	6.53023	28.4519	9.60576e-08	1.77853e-06
BRADI_1g67120v3	-2.06024	5.68571	28.4461	9.63446e-08	1.78215e-06
BRADI_1g48080v3	-1.45815	5.13435	28.4361	9.68417e-08	1.78963e-06
BRADI_1g33040v3	2.9159	2.8941	28.4308	9.71098e-08	1.79288e-06
BRADI_4g35700v3	2.47083	3.01338	28.4287	9.72123e-08	1.79307e-06
BRADI_4g32730v3	-1.8507	7.10326	28.4189	9.77067e-08	1.80043e-06
BRADI_5g16570v3	1.77209	4.41016	28.4171	9.77972e-08	1.80043e-06
BRADI_1g13660v3	1.37326	5.03509	28.3935	9.89972e-08	1.8208e-06
BRADI_3g45460v3	1.48674	6.1857	28.3347	1.02048e-07	1.87513e-06
BRADI_4g08050v3	-1.19622	6.87606	28.3243	1.02599e-07	1.88347e-06
BRADI_1g47767v3	2.14004	8.32635	28.3195	1.02854e-07	1.88637e-06
BRADI_3g20810v3	1.80145	5.90466	28.3168	1.03e-07	1.88726e-06
BRADI_2g43790v3	2.63635	3.67596	28.3094	1.03394e-07	1.89269e-06
BRADI_1g30317v3	-1.6799	1.85393	28.2861	1.04646e-07	1.91381e-06
BRADI_4g36370v3	1.39564	8.56047	28.2806	1.04944e-07	1.91745e-06
BRADI_2g24987v3	3.72114	3.74785	28.2748	1.0526e-07	1.92142e-06
BRADI_1g20260v3	-1.51548	2.83585	28.2725	1.05383e-07	1.92186e-06
BRADI_2g24340v3	-1.77893	4.34854	28.2349	1.07449e-07	1.95769e-06
BRADI_4g35230v3	-3.72645	3.47822	28.2309	1.07674e-07	1.95996e-06
BRADI_4g43280v3	-1.24916	6.07127	28.2218	1.08178e-07	1.96727e-06
BRADI_4g33899v3	-2.56442	2.47074	28.2025	1.09264e-07	1.98516e-06
BRADI_1g13900v3	-1.60987	4.52016	28.1902	1.09961e-07	1.99596e-06
BRADI_1g48697v3	1.70677	6.06637	28.1814	1.10462e-07	2.00318e-06
BRADI_1g13232v3	1.44376	5.63414	28.1667	1.11305e-07	2.01659e-06
BRADI_3g18600v3	1.22296	4.79173	28.1613	1.11616e-07	2.02033e-06
BRADI_1g31971v3	-3.36739	-0.23079	28.1472	1.12433e-07	2.03322e-06
BRADI_2g48450v3	1.739	7.10223	28.1059	1.14856e-07	2.07511e-06
BRADI_5g10140v3	-1.30716	5.99535	28.083	1.16224e-07	2.09787e-06
BRADI_2g52740v3	2.3052	1.95595	28.0646	1.17336e-07	2.11597e-06
BRADI_1g71690v3	-1.72386	6.10676	28.0593	1.17655e-07	2.11976e-06
BRADI_1g26530v3	-2.87512	8.90809	28.0572	1.17785e-07	2.12012e-06
BRADI_1g54007v3	-1.53503	2.54103	28.0426	1.18677e-07	2.1342e-06
BRADI_3g42280v3	2.98378	3.08308	28.037	1.19019e-07	2.13837e-06
BRADI_3g08870v3	3.0929	2.72481	28.0269	1.1964e-07	2.14755e-06
BRADI_2g27130v3	-1.73918	3.49257	28.018	1.20192e-07	2.15545e-06
BRADI_3g01440v3	-1.77598	4.45749	28.0097	1.20706e-07	2.16268e-06
BRADI_1g38050v3	1.46926	3.53876	27.9952	1.21616e-07	2.17697e-06
BRADI_2g48730v3	2.91011	3.86604	27.9923	1.218e-07	2.17825e-06
BRADI_2g00600v3	1.55301	3.71129	27.968	1.23336e-07	2.20259e-06
BRADI_4g23640v3	3.32144	5.35492	27.9672	1.23388e-07	2.20259e-06
BRADI_1g24320v3	-1.4216	4.14293	27.9635	1.23629e-07	2.20486e-06
BRADI_2g54940v3	1.53788	4.16619	27.9585	1.23944e-07	2.20846e-06
BRADI_4g40260v3	-1.42511	5.1711	27.953	1.24297e-07	2.21272e-06
BRADI_2g36897v3	2.15361	3.85482	27.908	1.27226e-07	2.26132e-06
BRADI_1g69650v3	-1.62298	7.08195	27.9074	1.2726e-07	2.26132e-06
BRADI_3g14710v3	-4.69322	3.8403	27.8988	1.27826e-07	2.26929e-06
BRADI_3g49590v3	-1.55345	4.58299	27.8875	1.28577e-07	2.28053e-06
BRADI_3g18750v3	-1.96637	5.40936	27.8506	1.31054e-07	2.32235e-06
BRADI_4g37620v3	-1.57735	5.35227	27.8441	1.31493e-07	2.32799e-06
BRADI_1g11000v3	-1.41157	7.4025	27.7948	1.34885e-07	2.38588e-06
BRADI_3g16400v3	-3.52391	7.16987	27.7801	1.35917e-07	2.40195e-06
BRADI_3g54370v3	-3.00161	1.06648	27.7768	1.36148e-07	2.40384e-06
BRADI_1g49180v3	-2.51541	4.93507	27.7717	1.3651e-07	2.40803e-06
BRADI_1g78772v3	2.234	4.7883	27.7687	1.36722e-07	2.40959e-06
BRADI_3g44110v3	-1.59868	3.76438	27.7659	1.36917e-07	2.41084e-06
BRADI_3g50726v3	-1.27694	4.57742	27.758	1.37476e-07	2.41849e-06
BRADI_5g13570v3	-2.06989	7.64431	27.7481	1.38186e-07	2.42824e-06
BRADI_4g05978v3	7.35002	0.309997	27.7467	1.38281e-07	2.42824e-06
BRADI_1g73670v3	1.22985	4.04215	27.7347	1.39144e-07	2.44119e-06
BRADI_4g14000v3	-1.5168	7.25336	27.7291	1.3955e-07	2.44609e-06
BRADI_2g44440v3	-1.61267	7.13579	27.7265	1.39733e-07	2.44709e-06
BRADI_2g26290v3	-1.21954	4.13212	27.7209	1.40138e-07	2.45197e-06
BRADI_4g05860v3	-1.3586	5.87856	27.685	1.42762e-07	2.49564e-06
BRADI_4g44912v3	-2.21611	4.08505	27.6645	1.44284e-07	2.51899e-06
BRADI_3g48637v3	1.88888	2.92386	27.6635	1.44358e-07	2.51899e-06
BRADI_1g38190v3	1.23145	4.62653	27.6351	1.46493e-07	2.55395e-06
BRADI_5g12040v3	-3.62878	1.74852	27.6164	1.47919e-07	2.57649e-06
BRADI_5g20880v3	-1.92849	6.35081	27.6115	1.48292e-07	2.58068e-06
BRADI_3g10937v3	-1.75566	4.70552	27.5945	1.49605e-07	2.6012e-06
BRADI_1g21900v3	-2.24603	3.95447	27.5811	1.50641e-07	2.615e-06
BRADI_4g14975v3	-4.11347	0.370225	27.5808	1.50668e-07	2.615e-06
BRADI_2g07266v3	-1.53831	5.13632	27.5691	1.51582e-07	2.62851e-06
BRADI_3g04430v3	1.27766	6.09598	27.5477	1.53268e-07	2.65516e-06
BRADI_1g71667v3	-2.08644	7.73229	27.5461	1.53393e-07	2.65516e-06
BRADI_2g27280v3	6.16614	6.06915	27.5136	1.55995e-07	2.69779e-06
BRADI_3g34980v3	-1.97075	8.23878	27.4893	1.57967e-07	2.72947e-06
BRADI_4g35810v3	-1.8199	7.35693	27.4754	1.59103e-07	2.74665e-06
BRADI_5g15527v3	-2.4375	1.09546	27.4712	1.59453e-07	2.74832e-06
BRADI_3g42580v3	-1.41163	7.91377	27.4708	1.59483e-07	2.74832e-06
BRADI_3g04981v3	-1.68323	5.60951	27.4658	1.59899e-07	2.75133e-06
BRADI_1g73830v3	2.06372	6.26492	27.4653	1.59941e-07	2.75133e-06
BRADI_1g53060v3	-1.90476	2.62067	27.447	1.61461e-07	2.77501e-06
BRADI_3g09730v3	-1.81557	7.27224	27.4231	1.63467e-07	2.807e-06
BRADI_1g00750v3	-1.46149	6.1302	27.3803	1.67125e-07	2.86727e-06
BRADI_1g44630v3	2.82034	5.73369	27.3766	1.67444e-07	2.87022e-06
BRADI_3g37245v3	3.39273	0.32918	27.3722	1.67824e-07	2.87419e-06
BRADI_4g08470v3	1.5055	4.89098	27.3538	1.69432e-07	2.89918e-06
BRADI_3g08160v3	-1.71694	3.62474	27.3447	1.70229e-07	2.91024e-06
BRADI_5g07390v3	-1.42722	6.09997	27.3425	1.70428e-07	2.91107e-06
BRADI_1g58746v3	-3.52505	3.72787	27.3286	1.71655e-07	2.92947e-06
BRADI_3g32880v3	-2.19702	3.7568	27.3241	1.72051e-07	2.93364e-06
BRADI_3g48840v3	-3.51751	2.05724	27.286	1.75476e-07	2.98941e-06
BRADI_5g15480v3	1.64406	2.34917	27.2707	1.76873e-07	3.00954e-06
BRADI_1g12110v3	1.79903	5.24687	27.2696	1.76968e-07	3.00954e-06
BRADI_2g17400v3	-4.39171	0.383337	27.222	1.8138e-07	3.08188e-06
BRADI_1g71420v3	-1.63775	5.93827	27.2135	1.82185e-07	3.09284e-06
BRADI_1g59420v3	-2.47503	4.91388	27.2031	1.83162e-07	3.1067e-06
BRADI_4g31360v3	2.83312	2.9305	27.1931	1.84119e-07	3.12022e-06
BRADI_2g36073v3	4.02491	1.95452	27.1624	1.87059e-07	3.16553e-06
BRADI_1g34560v3	-2.55905	7.59008	27.1618	1.87119e-07	3.16553e-06
BRADI_4g06017v3	-2.18174	5.9273	27.1478	1.88478e-07	3.18574e-06
BRADI_3g05880v3	-1.60354	3.97358	27.1142	1.91785e-07	3.23881e-06
BRADI_5g25440v3	-1.17957	4.64599	27.0865	1.94548e-07	3.28262e-06
BRADI_4g12648v3	3.59169	2.06073	27.0742	1.95794e-07	3.30077e-06
BRADI_2g26710v3	1.05987	5.01279	27.0553	1.97718e-07	3.33032e-06
BRADI_3g48290v3	-2.13985	2.76733	27.0497	1.98296e-07	3.33715e-06
BRADI_4g39090v3	-1.20453	4.28681	27.0383	1.9946e-07	3.35384e-06
BRADI_2g46850v3	-1.68293	5.92787	27.0364	1.99659e-07	3.35427e-06
BRADI_1g35030v3	1.80313	3.58754	27.0248	2.00866e-07	3.37163e-06
BRADI_3g19310v3	-1.258	5.74669	27.0085	2.0256e-07	3.39712e-06
BRADI_4g08130v3	1.53946	4.65607	27.0047	2.02964e-07	3.40095e-06
BRADI_1g64698v3	3.13098	1.81338	26.9986	2.03606e-07	3.40721e-06
BRADI_4g03610v3	1.10411	6.23492	26.9969	2.03784e-07	3.40721e-06
BRADI_1g09760v3	-1.51549	5.86412	26.9961	2.03864e-07	3.40721e-06
BRADI_2g52710v3	-1.75086	5.15481	26.9756	2.06043e-07	3.44066e-06
BRADI_2g04950v3	1.64173	3.49746	26.9673	2.06925e-07	3.45243e-06
BRADI_2g06950v3	2.1154	4.43359	26.9645	2.07224e-07	3.45445e-06
BRADI_4g44890v3	1.29081	5.53282	26.9436	2.09483e-07	3.48911e-06
BRADI_1g44005v3	-2.65179	4.36897	26.9193	2.1213e-07	3.53017e-06
BRADI_2g21230v3	3.36922	0.308114	26.9146	2.12641e-07	3.53564e-06
BRADI_3g09660v3	-3.63944	8.77776	26.9032	2.13901e-07	3.55353e-06
BRADI_3g48470v3	-1.72913	5.30177	26.8966	2.14632e-07	3.56263e-06
BRADI_1g00620v3	-1.76374	4.9982	26.8721	2.17375e-07	3.60509e-06
BRADI_1g72780v3	-1.72211	6.11355	26.8079	2.24712e-07	3.72357e-06
BRADI_5g24590v3	-1.8068	5.46796	26.8025	2.25342e-07	3.73083e-06
BRADI_3g39920v3	-1.91001	2.72141	26.7969	2.25997e-07	3.73848e-06
BRADI_1g75270v3	1.68167	7.87208	26.7947	2.26263e-07	3.73969e-06
BRADI_1g63927v3	2.31094	5.42857	26.7874	2.27109e-07	3.75049e-06
BRADI_3g55650v3	2.95118	1.57938	26.7829	2.27638e-07	3.75602e-06
BRADI_2g45730v3	-1.86467	8.71357	26.7772	2.28314e-07	3.76398e-06
BRADI_1g42513v3	-2.77977	1.3573	26.7751	2.28565e-07	3.76493e-06
BRADI_4g44000v3	5.79379	2.07242	26.7404	2.32703e-07	3.82983e-06
BRADI_1g50057v3	1.74515	3.68543	26.7329	2.33607e-07	3.84145e-06
BRADI_3g34567v3	-3.36738	-0.0225208	26.7248	2.34592e-07	3.85437e-06
BRADI_1g31210v3	2.13386	1.49124	26.7181	2.3541e-07	3.86455e-06
BRADI_1g35780v3	1.46085	6.77671	26.6855	2.39417e-07	3.927e-06
BRADI_3g55850v3	-3.05614	0.229323	26.6613	2.4243e-07	3.97307e-06
BRADI_3g11470v3	3.7826	0.622759	26.6517	2.43641e-07	3.98954e-06
BRADI_1g29260v3	-2.83214	5.42969	26.6437	2.44654e-07	4.00137e-06
BRADI_2g21420v3	-2.01039	4.09708	26.6414	2.4494e-07	4.00137e-06
BRADI_1g33900v3	2.57	2.68744	26.6411	2.44982e-07	4.00137e-06
BRADI_1g18500v3	1.41862	2.80313	26.6356	2.45678e-07	4.00937e-06
BRADI_1g36720v3	-2.57023	1.65163	26.6181	2.47909e-07	4.04237e-06
BRADI_2g27300v3	2.27807	2.30473	26.6049	2.49608e-07	4.06667e-06
BRADI_2g60409v3	2.24893	7.30515	26.596	2.50762e-07	4.07917e-06
BRADI_1g61413v3	1.54223	4.70836	26.594	2.51026e-07	4.07917e-06
BRADI_4g36972v3	-3.33732	-0.0534587	26.593	2.51157e-07	4.07917e-06
BRADI_1g60750v3	1.97582	3.86583	26.5916	2.51329e-07	4.07917e-06
BRADI_4g27490v3	1.35192	6.21527	26.5909	2.51427e-07	4.07917e-06
BRADI_1g01250v3	1.20106	4.85019	26.581	2.52712e-07	4.09659e-06
BRADI_3g51280v3	2.32946	3.03231	26.5713	2.53989e-07	4.11386e-06
BRADI_4g29730v3	-2.25552	4.73034	26.5665	2.54622e-07	4.12067e-06
BRADI_1g13322v3	3.72579	0.263272	26.5603	2.55446e-07	4.13056e-06
BRADI_5g21280v3	6.26601	3.34169	26.5564	2.55958e-07	4.1354e-06
BRADI_3g47890v3	-1.57926	7.50681	26.5501	2.56798e-07	4.14423e-06
BRADI_1g15120v3	-1.2073	5.92875	26.549	2.56932e-07	4.14423e-06
BRADI_2g27140v3	-3.80326	8.68234	26.5473	2.57164e-07	4.14453e-06
BRADI_2g39710v3	-1.17069	4.80109	26.541	2.57998e-07	4.15451e-06
BRADI_1g41820v3	-2.20217	8.24869	26.5292	2.5958e-07	4.17652e-06
BRADI_2g18160v3	2.29138	1.91218	26.5222	2.60529e-07	4.18833e-06
BRADI_1g20780v3	-3.95049	5.19282	26.5112	2.62009e-07	4.20863e-06
BRADI_4g38980v3	-1.01168	5.08418	26.5064	2.62666e-07	4.21569e-06
BRADI_3g36740v3	4.37675	-0.308133	26.4479	2.70736e-07	4.34162e-06
BRADI_1g77400v3	-1.92445	4.51991	26.4335	2.72765e-07	4.37055e-06
BRADI_4g12070v3	-1.77366	4.62071	26.4121	2.75808e-07	4.41213e-06
BRADI_2g05250v3	1.91363	2.98188	26.412	2.75815e-07	4.41213e-06
BRADI_3g30480v3	1.95037	4.74518	26.4069	2.76545e-07	4.42016e-06
BRADI_3g44810v3	-3.17437	3.20824	26.4007	2.77444e-07	4.43089e-06
BRADI_4g30170v3	-1.41876	5.31187	26.3852	2.79682e-07	4.46295e-06
BRADI_1g03920v3	1.64848	4.70805	26.3354	2.86986e-07	4.57575e-06
BRADI_1g30830v3	1.30911	5.45853	26.2879	2.94132e-07	4.68443e-06
BRADI_1g42510v3	6.31456	-0.513559	26.2868	2.94286e-07	4.68443e-06
BRADI_1g51242v3	6.22844	-0.573731	26.284	2.94728e-07	4.68478e-06
BRADI_2g44520v3	-3.6826	5.92658	26.2835	2.9479e-07	4.68478e-06
BRADI_3g55870v3	-1.26631	6.1593	26.2562	2.98987e-07	4.74758e-06
BRADI_3g10230v3	-3.36252	-0.259046	26.2385	3.01745e-07	4.78745e-06
BRADI_2g08340v3	-2.72408	9.87822	26.2227	3.04232e-07	4.82297e-06
BRADI_3g38527v3	-1.12611	6.35963	26.2008	3.07689e-07	4.8738e-06
BRADI_2g40040v3	-1.87616	6.52281	26.1789	3.11197e-07	4.92534e-06
BRADI_5g09310v3	-1.58171	4.20776	26.176	3.11675e-07	4.92889e-06
BRADI_1g56922v3	-2.42764	4.00625	26.1482	3.16187e-07	4.99617e-06
BRADI_5g19130v3	-1.43638	5.60951	26.1309	3.1903e-07	5.03699e-06
BRADI_3g47910v3	-2.11278	7.26207	26.128	3.19523e-07	5.03751e-06
BRADI_4g02192v3	-1.49226	3.58002	26.1276	3.19582e-07	5.03751e-06
BRADI_4g40880v3	3.31708	1.35807	26.1171	3.21326e-07	5.06089e-06
BRADI_3g52862v3	-1.57844	8.68917	26.1048	3.23383e-07	5.08916e-06
BRADI_2g23540v3	-3.15656	6.04534	26.0957	3.24912e-07	5.10606e-06
BRADI_1g55063v3	2.1361	2.20651	26.0952	3.24983e-07	5.10606e-06
BRADI_5g21700v3	7.13226	0.133872	26.0773	3.28021e-07	5.14961e-06
BRADI_1g60104v3	-1.64012	3.26508	26.0684	3.29534e-07	5.16919e-06
BRADI_2g11770v3	3.11491	0.362835	26.0658	3.29974e-07	5.1719e-06
BRADI_2g60331v3	-2.48694	2.87899	26.0421	3.34055e-07	5.23164e-06
BRADI_2g35610v3	7.8059	0.693295	26.0011	3.41225e-07	5.33963e-06
BRADI_3g49360v3	-2.92834	7.21829	25.9314	3.53765e-07	5.5314e-06
BRADI_5g23430v3	1.74902	5.92458	25.8971	3.60114e-07	5.62366e-06
BRADI_5g23890v3	-1.34677	7.764	25.8957	3.60375e-07	5.62366e-06
BRADI_1g27436v3	-2.37668	2.57282	25.8948	3.60536e-07	5.62366e-06
BRADI_4g43110v3	-1.16223	5.48754	25.8921	3.61039e-07	5.62493e-06
BRADI_2g12780v3	-1.43738	6.39481	25.8913	3.61197e-07	5.62493e-06
BRADI_3g54760v3	-2.46089	0.628445	25.8802	3.63282e-07	5.65287e-06
BRADI_2g39150v3	-1.09292	5.60689	25.8637	3.66404e-07	5.69688e-06
BRADI_3g05400v3	-1.27397	6.4654	25.8603	3.6705e-07	5.70235e-06
BRADI_4g04050v3	-1.87629	6.56057	25.8386	3.71197e-07	5.76217e-06
BRADI_1g77100v3	-1.3134	6.12224	25.8271	3.73412e-07	5.78668e-06
BRADI_1g09431v3	-2.55898	6.31372	25.826	3.73631e-07	5.78668e-06
BRADI_3g01550v3	-1.28157	6.59963	25.8257	3.73671e-07	5.78668e-06
BRADI_2g34740v3	-1.38892	5.56754	25.8219	3.74414e-07	5.79357e-06
BRADI_4g25910v3	-1.68471	4.06404	25.8193	3.74929e-07	5.79692e-06
BRADI_3g19180v3	-1.76117	4.52399	25.8163	3.75503e-07	5.80116e-06
BRADI_2g22650v3	-2.95065	1.66037	25.8055	3.77609e-07	5.82906e-06
BRADI_4g07620v3	-1.61393	3.2219	25.7903	3.80599e-07	5.87055e-06
BRADI_3g44770v3	-1.15985	7.24201	25.7767	3.83291e-07	5.90738e-06
BRADI_2g01990v3	2.10932	3.9906	25.7744	3.83735e-07	5.90952e-06
BRADI_3g48886v3	3.86407	-0.0447046	25.744	3.89835e-07	5.99869e-06
BRADI_1g69710v3	-3.09388	5.42784	25.7413	3.90382e-07	6.00236e-06
BRADI_5g03930v3	-1.37566	2.6055	25.7166	3.95417e-07	6.07496e-06
BRADI_2g43917v3	-2.67453	6.0748	25.713	3.96145e-07	6.08133e-06
BRADI_1g10990v3	-1.60409	7.57066	25.7092	3.96923e-07	6.08846e-06
BRADI_1g17840v3	-3.48106	4.92931	25.6998	3.98863e-07	6.11338e-06
BRADI_1g18347v3	-1.25607	3.50969	25.6918	4.00527e-07	6.13404e-06
BRADI_2g21180v3	-1.87667	2.33795	25.6851	4.0191e-07	6.15036e-06
BRADI_1g43990v3	-4.36279	-0.0275832	25.6752	4.03994e-07	6.17739e-06
BRADI_2g03680v3	-1.40693	6.90458	25.6568	4.07864e-07	6.23164e-06
BRADI_4g08800v3	-4.22829	12.7079	25.6365	4.12172e-07	6.29251e-06
BRADI_4g43300v3	-1.27973	6.71641	25.607	4.18528e-07	6.38453e-06
BRADI_1g68680v3	-1.40805	2.61146	25.5843	4.2348e-07	6.45499e-06
BRADI_4g26990v3	1.24541	4.85206	25.58	4.24411e-07	6.46411e-06
BRADI_2g45012v3	5.5381	0.61248	25.5668	4.27332e-07	6.50348e-06
BRADI_5g19230v3	2.22913	2.60972	25.5514	4.30759e-07	6.55051e-06
BRADI_3g19280v3	1.39859	6.39337	25.5408	4.33137e-07	6.58152e-06
BRADI_1g17090v3	-1.83375	7.88065	25.5308	4.35368e-07	6.61023e-06
BRADI_1g30730v3	-1.53091	7.30528	25.5181	4.38258e-07	6.64892e-06
BRADI_4g14490v3	1.31501	4.21486	25.4932	4.43943e-07	6.72296e-06
BRADI_1g61757v3	-1.64018	4.49751	25.4931	4.43978e-07	6.72296e-06
BRADI_1g28960v3	-1.28041	6.12095	25.4922	4.44178e-07	6.72296e-06
BRADI_1g22050v3	-2.29382	5.7746	25.4884	4.45042e-07	6.73078e-06
BRADI_4g24846v3	-1.5148	5.4741	25.4827	4.46368e-07	6.74408e-06
BRADI_1g34610v3	-2.50453	3.27187	25.4812	4.46723e-07	6.74408e-06
BRADI_3g36397v3	-1.1408	5.71204	25.4801	4.46964e-07	6.74408e-06
BRADI_1g02621v3	1.61588	4.78505	25.4663	4.5018e-07	6.78733e-06
BRADI_3g48350v3	1.52028	6.70351	25.4466	4.54795e-07	6.85158e-06
BRADI_1g68372v3	1.92819	3.63205	25.437	4.57069e-07	6.8805e-06
BRADI_4g05210v3	2.48692	5.41546	25.4324	4.58167e-07	6.89168e-06
BRADI_3g11163v3	-2.95222	0.816964	25.4269	4.59461e-07	6.9058e-06
BRADI_5g08920v3	-1.08903	6.55406	25.4158	4.62118e-07	6.94035e-06
BRADI_1g02030v3	-2.09489	7.13489	25.3949	4.6714e-07	7.01035e-06
BRADI_1g02150v3	-1.88756	5.86768	25.3933	4.67534e-07	7.01084e-06
BRADI_3g00910v3	4.02137	7.26567	25.3869	4.6909e-07	7.02875e-06
BRADI_4g31530v3	-2.87396	0.795638	25.3737	4.72319e-07	7.07167e-06
BRADI_4g35950v3	-1.57926	6.70655	25.3631	4.74924e-07	7.10309e-06
BRADI_5g16970v3	-2.30663	0.65581	25.3621	4.7515e-07	7.10309e-06
BRADI_2g50120v3	-1.58019	5.21733	25.3523	4.77572e-07	7.1338e-06
BRADI_3g35680v3	-3.18444	5.62798	25.3342	4.82085e-07	7.19568e-06
BRADI_1g76787v3	-1.86865	5.04627	25.3071	4.88915e-07	7.29201e-06
BRADI_5g16870v3	-7.02009	-0.337489	25.2741	4.9735e-07	7.41211e-06
BRADI_3g57525v3	3.45679	1.03015	25.266	4.99431e-07	7.43742e-06
BRADI_1g23080v3	-2.89899	1.75757	25.2582	5.01464e-07	7.46197e-06
BRADI_1g07370v3	-1.84403	5.92292	25.2529	5.02829e-07	7.47655e-06
BRADI_3g10760v3	-1.34686	5.99803	25.2504	5.03486e-07	7.48058e-06
BRADI_3g13170v3	-2.69353	11.1446	25.2423	5.05611e-07	7.50127e-06
BRADI_3g56750v3	2.23141	3.39125	25.2421	5.05652e-07	7.50127e-06
BRADI_2g46520v3	-1.46046	7.34282	25.2363	5.0718e-07	7.51819e-06
BRADI_4g16010v3	-1.98222	3.67732	25.2348	5.07576e-07	7.51832e-06
BRADI_2g08620v3	1.55999	6.03211	25.2152	5.12765e-07	7.5894e-06
BRADI_3g10200v3	-1.22402	6.48297	25.2114	5.1378e-07	7.59595e-06
BRADI_1g45884v3	1.46716	7.16744	25.2106	5.13991e-07	7.59595e-06
BRADI_1g69209v3	-2.53045	1.07837	25.2039	5.15769e-07	7.61341e-06
BRADI_1g75590v3	1.7057	4.33354	25.2032	5.15957e-07	7.61341e-06
BRADI_2g01960v3	7.88339	0.759159	25.1939	5.18469e-07	7.64466e-06
BRADI_1g25860v3	-2.00794	11.1916	25.1889	5.19815e-07	7.65868e-06
BRADI_1g05850v3	2.2332	1.5798	25.1804	5.22106e-07	7.6866e-06
BRADI_3g45770v3	-2.24088	3.60266	25.1659	5.26035e-07	7.73858e-06
BRADI_2g12020v3	-2.15446	5.76916	25.1643	5.26471e-07	7.73912e-06
BRADI_2g54630v3	1.33776	5.09993	25.1564	5.28629e-07	7.76117e-06
BRADI_4g37400v3	-1.03445	5.70723	25.1559	5.28771e-07	7.76117e-06
BRADI_2g45480v3	-3.60857	2.64246	25.1505	5.30264e-07	7.77721e-06
BRADI_1g14900v3	-2.52672	2.49101	25.148	5.30937e-07	7.78119e-06
BRADI_2g10740v3	-2.58956	6.43801	25.1382	5.33639e-07	7.81489e-06
BRADI_1g06750v3	-1.75093	4.99091	25.1332	5.35033e-07	7.82939e-06
BRADI_2g23027v3	1.10926	4.30501	25.1024	5.43656e-07	7.94959e-06
BRADI_2g62170v3	-2.50153	7.62146	25.0995	5.44473e-07	7.95554e-06
BRADI_3g01920v3	-1.75959	5.27559	25.0958	5.45525e-07	7.96492e-06
BRADI_4g33450v3	1.37545	5.30264	25.0873	5.47939e-07	7.99413e-06
BRADI_5g13010v3	-2.21697	4.38211	25.0715	5.52432e-07	8.05364e-06
BRADI_1g51670v3	-2.21196	10.6395	25.0651	5.54258e-07	8.07419e-06
BRADI_2g23350v3	6.71534	-0.22381	25.0606	5.55563e-07	8.08148e-06
BRADI_2g46665v3	-2.97489	1.6758	25.0605	5.55592e-07	8.08148e-06
BRADI_2g39410v3	1.92149	2.88482	25.0451	5.60063e-07	8.14042e-06
BRADI_4g04460v3	-1.33075	7.44928	25.0363	5.62604e-07	8.17124e-06
BRADI_2g18210v3	-0.987367	5.74874	25.0274	5.65222e-07	8.19998e-06
BRADI_4g23280v3	3.37358	0.764344	25.0267	5.65429e-07	8.19998e-06
BRADI_2g55297v3	-1.25711	8.38623	25.0222	5.6673e-07	8.21079e-06
BRADI_1g62652v3	-3.26774	2.31759	25.0212	5.6702e-07	8.21079e-06
BRADI_1g06670v3	-2.14532	6.79279	25.0045	5.71954e-07	8.27606e-06
BRADI_2g14500v3	-2.86096	3.1717	25.0031	5.72392e-07	8.27622e-06
BRADI_1g62410v3	-2.4025	5.99346	24.9997	5.73398e-07	8.28459e-06
BRADI_2g24910v3	-2.78185	5.57564	24.988	5.76894e-07	8.32891e-06
BRADI_2g47037v3	1.838	3.29396	24.9715	5.81839e-07	8.39406e-06
BRADI_4g01100v3	-1.2498	6.26131	24.9494	5.88554e-07	8.48462e-06
BRADI_3g47067v3	-3.4469	4.16803	24.9473	5.8918e-07	8.48734e-06
BRADI_4g14640v3	4.40292	-0.297416	24.9126	5.99899e-07	8.63534e-06
BRADI_3g04217v3	-1.90868	3.40485	24.9062	6.0189e-07	8.65757e-06
BRADI_3g50508v3	6.38801	-0.450066	24.8996	6.03959e-07	8.68091e-06
BRADI_4g44838v3	-3.43368	6.37383	24.8966	6.04901e-07	8.68801e-06
BRADI_1g56990v3	0.967549	4.89472	24.8943	6.05611e-07	8.69177e-06
BRADI_2g02426v3	-1.36995	3.78371	24.8781	6.10721e-07	8.75864e-06
BRADI_3g19760v3	-3.19341	-0.153037	24.8714	6.12851e-07	8.78269e-06
BRADI_1g74570v3	-1.87283	6.51303	24.8675	6.14103e-07	8.79414e-06
BRADI_3g04490v3	5.04904	0.93027	24.8634	6.15408e-07	8.80633e-06
BRADI_1g70610v3	1.59375	2.84618	24.8214	6.28962e-07	8.99364e-06
BRADI_1g66460v3	8.36328	1.17494	24.8199	6.29431e-07	8.99373e-06
BRADI_1g29427v3	1.18206	3.30458	24.8134	6.31585e-07	9.01786e-06
BRADI_2g54760v3	4.51706	0.908113	24.7957	6.37404e-07	9.0789e-06
BRADI_1g26840v3	-1.55609	4.27775	24.795	6.37622e-07	9.0789e-06
BRADI_1g54840v3	-1.47112	3.84579	24.7934	6.38164e-07	9.0789e-06
BRADI_1g34380v3	3.70992	-0.166994	24.7933	6.38185e-07	9.0789e-06
BRADI_2g11900v3	2.78278	5.46628	24.792	6.38612e-07	9.0789e-06
BRADI_1g73200v3	-2.17046	5.77167	24.7919	6.38667e-07	9.0789e-06
BRADI_2g05850v3	1.68473	3.29982	24.787	6.40292e-07	9.09533e-06
BRADI_2g09720v3	-1.28807	5.14601	24.7826	6.41753e-07	9.10942e-06
BRADI_2g56660v3	1.36257	3.9585	24.7779	6.43294e-07	9.12462e-06
BRADI_1g63850v3	-1.14488	4.68249	24.7702	6.45877e-07	9.15457e-06
BRADI_3g29780v3	5.9495	0.960553	24.765	6.47636e-07	9.1728e-06
BRADI_4g35790v3	2.68133	1.65925	24.7587	6.49748e-07	9.196e-06
BRADI_3g19202v3	-3.91537	1.66325	24.7303	6.59401e-07	9.32415e-06
BRADI_1g57470v3	-1.8961	5.03072	24.7292	6.59764e-07	9.32415e-06
BRADI_4g19197v3	1.11081	4.72566	24.708	6.67074e-07	9.4206e-06
BRADI_3g22635v3	1.41655	5.01147	24.69	6.73324e-07	9.49806e-06
BRADI_4g29560v3	1.06067	4.50365	24.6894	6.73538e-07	9.49806e-06
BRADI_5g17750v3	1.197	5.68415	24.675	6.78591e-07	9.56237e-06
BRADI_2g30400v3	-2.62352	9.45406	24.6553	6.85558e-07	9.65353e-06
BRADI_2g01590v3	1.96687	4.16011	24.6403	6.90915e-07	9.72191e-06
BRADI_3g01810v3	-1.62845	4.73111	24.6358	6.92538e-07	9.73769e-06
BRADI_2g05050v3	-3.28228	5.4333	24.6309	6.94283e-07	9.75515e-06
BRADI_3g34070v3	-1.62939	3.6112	24.6117	7.0126e-07	9.83915e-06
BRADI_2g48557v3	-1.56723	4.49614	24.6116	7.01275e-07	9.83915e-06
BRADI_1g22187v3	7.3591	0.321192	24.604	7.04044e-07	9.87086e-06
BRADI_2g20020v3	2.25263	2.98623	24.5959	7.07038e-07	9.90568e-06
BRADI_3g13200v3	2.49297	1.81823	24.5763	7.14246e-07	9.99944e-06
BRADI_3g59790v3	-1.26163	6.15445	24.5558	7.21873e-07	1.00989e-05
BRADI_1g58600v3	-1.80399	6.1489	24.4979	7.43925e-07	1.03999e-05
BRADI_2g08500v3	1.5035	7.63672	24.4711	7.54339e-07	1.05379e-05
BRADI_5g08622v3	1.41573	3.28157	24.453	7.61438e-07	1.06295e-05
BRADI_3g42290v3	3.74826	1.44931	24.4403	7.66467e-07	1.0692e-05
BRADI_1g21018v3	-1.61976	3.84088	24.4349	7.68627e-07	1.07144e-05
BRADI_1g15035v3	6.90694	-0.0465652	24.4086	7.79211e-07	1.08541e-05
BRADI_3g12980v3	-2.51232	5.17903	24.3637	7.97573e-07	1.11019e-05
BRADI_2g07830v3	-2.62829	1.19188	24.3586	7.99698e-07	1.11235e-05
BRADI_4g03197v3	2.27979	3.87147	24.3493	8.0355e-07	1.11691e-05
BRADI_2g19367v3	6.11649	-0.649216	24.3114	8.19506e-07	1.13827e-05
BRADI_1g77080v3	-0.998016	5.09009	24.3025	8.23332e-07	1.14277e-05
BRADI_3g42730v3	-1.44993	6.55681	24.2871	8.29935e-07	1.15111e-05
BRADI_4g07670v3	2.56996	0.872392	24.2842	8.31171e-07	1.152e-05
BRADI_3g09580v3	-1.55288	6.96927	24.2772	8.34216e-07	1.1554e-05
BRADI_3g48790v3	-1.69842	8.97149	24.2607	8.41377e-07	1.16403e-05
BRADI_1g64640v3	-1.87534	5.6001	24.2601	8.41648e-07	1.16403e-05
BRADI_1g62270v3	4.00061	0.50578	24.2558	8.43517e-07	1.16578e-05
BRADI_2g05090v3	-1.82196	1.46482	24.2522	8.45092e-07	1.16713e-05
BRADI_4g31050v3	-5.02803	2.58006	24.2476	8.47146e-07	1.16913e-05
BRADI_1g26700v3	1.35836	4.72638	24.2436	8.48894e-07	1.17071e-05
BRADI_4g03680v3	-1.08338	3.92615	24.2347	8.5283e-07	1.17531e-05
BRADI_2g43740v3	-1.617	6.89788	24.231	8.54464e-07	1.17672e-05
BRADI_3g34550v3	1.28879	6.33977	24.2268	8.56313e-07	1.17843e-05
BRADI_3g35820v3	-1.27497	5.36652	24.2165	8.6093e-07	1.18395e-05
BRADI_4g42120v3	6.68917	-0.215038	24.2041	8.66494e-07	1.19075e-05
BRADI_1g54990v3	1.27143	5.65222	24.1806	8.77095e-07	1.20447e-05
BRADI_5g07410v3	1.2339	6.74169	24.1785	8.7806e-07	1.20494e-05
BRADI_4g34800v3	-1.79192	5.23051	24.1686	8.82592e-07	1.21031e-05
BRADI_3g38090v3	2.02877	2.43794	24.1631	8.85108e-07	1.2129e-05
BRADI_1g33300v3	1.20699	4.68482	24.1384	8.96555e-07	1.22772e-05
BRADI_1g55770v3	3.24219	2.87608	24.1109	9.09419e-07	1.24445e-05
BRADI_4g00430v3	-1.11532	4.65303	24.0963	9.16384e-07	1.25277e-05
BRADI_2g37470v3	1.24448	5.67986	24.0954	9.16787e-07	1.25277e-05
BRADI_1g74862v3	-2.69484	7.67977	24.0937	9.17609e-07	1.25301e-05
BRADI_1g64020v3	-1.50422	5.61555	24.0844	9.22055e-07	1.2582e-05
BRADI_3g06250v3	1.25272	4.45487	24.0755	9.2632e-07	1.26313e-05
BRADI_4g14850v3	-1.04075	5.47122	24.0709	9.28523e-07	1.26524e-05
BRADI_1g01270v3	1.78627	1.61402	24.051	9.38166e-07	1.27674e-05
BRADI_5g24550v3	-2.37546	10.3356	24.0508	9.38279e-07	1.27674e-05
BRADI_1g72100v3	1.79304	3.2387	24.0442	9.41485e-07	1.28021e-05
BRADI_4g18170v3	-1.83093	4.12124	24.0425	9.42346e-07	1.28048e-05
BRADI_1g59180v3	-2.19474	0.735604	24.0343	9.46336e-07	1.285e-05
BRADI_1g16620v3	1.7595	6.71235	24.027	9.49947e-07	1.289e-05
BRADI_2g45610v3	-1.53781	3.43668	24.0146	9.56078e-07	1.29609e-05
BRADI_3g51140v3	1.07375	4.99018	24.0137	9.56502e-07	1.29609e-05
BRADI_5g12390v3	5.35188	1.96744	23.9868	9.69997e-07	1.31346e-05
BRADI_2g16640v3	4.76527	0.688129	23.9788	9.74011e-07	1.31797e-05
BRADI_2g15565v3	-2.96442	-0.330072	23.9534	9.86978e-07	1.33459e-05
BRADI_1g19710v3	1.03002	4.8974	23.946	9.9078e-07	1.33879e-05
BRADI_3g07540v3	-1.14642	4.46575	23.9256	1.0013e-06	1.35206e-05
BRADI_1g15450v3	-2.10843	8.78641	23.9097	1.00964e-06	1.36238e-05
BRADI_1g65900v3	-1.73255	6.65991	23.8963	1.01667e-06	1.37091e-05
BRADI_5g12080v3	1.57696	5.85953	23.8729	1.02908e-06	1.38668e-05
BRADI_3g39830v3	-2.61852	6.88776	23.8683	1.03158e-06	1.38909e-05
BRADI_4g36220v3	-2.16017	7.54537	23.8648	1.03343e-06	1.39062e-05
BRADI_4g17370v3	-1.93403	3.1026	23.8628	1.03449e-06	1.39108e-05
BRADI_1g15670v3	-2.13296	1.54408	23.8583	1.03692e-06	1.39338e-05
BRADI_1g16560v3	1.10461	7.22013	23.832	1.05122e-06	1.41155e-05
BRADI_1g35770v3	1.15724	4.90287	23.8307	1.0519e-06	1.41155e-05
BRADI_5g14210v3	-2.31815	8.64364	23.8293	1.05268e-06	1.41162e-05
BRADI_2g49050v3	1.30095	3.1925	23.8141	1.06101e-06	1.42181e-05
BRADI_1g07133v3	-2.39577	5.73529	23.804	1.06659e-06	1.4283e-05
BRADI_3g48610v3	-1.1174	3.95745	23.7972	1.07036e-06	1.43236e-05
BRADI_1g39160v3	1.61249	2.29465	23.7879	1.07556e-06	1.43833e-05
BRADI_1g69220v3	-5.11343	5.92242	23.7865	1.07636e-06	1.4384e-05
BRADI_1g45833v3	-1.29789	7.05547	23.7745	1.08306e-06	1.44637e-05
BRADI_4g31250v3	1.21686	4.34321	23.7731	1.08387e-06	1.44645e-05
BRADI_1g11670v3	1.35453	7.06764	23.7651	1.08837e-06	1.45146e-05
BRADI_2g55750v3	-2.65244	4.7569	23.7294	1.10878e-06	1.47766e-05
BRADI_1g76200v3	7.38284	0.338945	23.6835	1.13553e-06	1.51227e-05
BRADI_2g59950v3	-1.79931	2.90723	23.6785	1.13845e-06	1.51512e-05
BRADI_4g16430v3	-1.03877	6.36149	23.6752	1.14044e-06	1.51673e-05
BRADI_4g08060v3	-0.994935	5.37983	23.6459	1.15795e-06	1.53896e-05
BRADI_3g27807v3	3.47369	4.97252	23.6301	1.16746e-06	1.55054e-05
BRADI_1g34500v3	-2.46019	4.42696	23.6266	1.16961e-06	1.55234e-05
BRADI_4g32800v3	6.54062	-0.329429	23.6193	1.17405e-06	1.55716e-05
BRADI_1g24250v3	-1.46677	5.75016	23.6012	1.18516e-06	1.57082e-05
BRADI_4g11920v3	-1.98884	3.36705	23.5926	1.19047e-06	1.57679e-05
BRADI_5g03460v3	2.949	2.79087	23.5809	1.19772e-06	1.58477e-05
BRADI_1g10320v3	7.9245	0.796849	23.5802	1.19814e-06	1.58477e-05
BRADI_1g44530v3	-1.42614	6.95489	23.5777	1.19971e-06	1.58577e-05
BRADI_4g34927v3	3.12247	6.43269	23.5631	1.20885e-06	1.59671e-05
BRADI_1g23060v3	-2.29019	0.958788	23.5618	1.20963e-06	1.59671e-05
BRADI_1g03220v3	-2.33246	6.93779	23.5586	1.21168e-06	1.59833e-05
BRADI_2g42137v3	1.04967	5.64316	23.5565	1.21302e-06	1.59901e-05
BRADI_1g18660v3	-1.19207	6.08674	23.5547	1.2141e-06	1.59934e-05
BRADI_2g11450v3	-1.98105	1.28243	23.5418	1.22229e-06	1.60904e-05
BRADI_2g32705v3	8.60738	1.39046	23.5314	1.22891e-06	1.61666e-05
BRADI_4g36947v3	-3.53266	-0.138204	23.5273	1.23155e-06	1.61903e-05
BRADI_3g44850v3	-1.64403	5.03308	23.5012	1.24833e-06	1.63999e-05
BRADI_3g58920v3	1.56657	3.82384	23.4961	1.2517e-06	1.6433e-05
BRADI_1g19740v3	-1.20711	3.02708	23.4913	1.25483e-06	1.64629e-05
BRADI_3g01630v3	-2.21097	4.2565	23.4833	1.26e-06	1.65197e-05
BRADI_2g13856v3	-1.38285	4.33468	23.4819	1.26093e-06	1.65206e-05
BRADI_4g08822v3	-2.56346	-0.0302152	23.4578	1.27687e-06	1.67182e-05
BRADI_1g77060v3	-1.68096	5.97084	23.45	1.28203e-06	1.67744e-05
BRADI_1g07400v3	1.15552	5.67736	23.4441	1.28598e-06	1.68123e-05
BRADI_4g41590v3	-1.28104	6.73538	23.4431	1.28666e-06	1.68123e-05
BRADI_3g42810v3	2.13106	3.16725	23.4284	1.2965e-06	1.69296e-05
BRADI_4g44496v3	-5.32592	1.12466	23.4238	1.29962e-06	1.69588e-05
BRADI_3g31870v3	3.25898	0.223113	23.4224	1.30055e-06	1.69596e-05
BRADI_3g33390v3	-2.67706	1.61119	23.4173	1.304e-06	1.69932e-05
BRADI_4g23290v3	1.6258	5.53699	23.4087	1.30986e-06	1.70576e-05
BRADI_1g14422v3	1.41863	5.86502	23.4074	1.31072e-06	1.70576e-05
BRADI_1g11850v3	-2.94309	0.141096	23.4062	1.31158e-06	1.70576e-05
BRADI_4g27627v3	-2.82794	1.07022	23.3968	1.31797e-06	1.71292e-05
BRADI_1g08550v3	-2.0706	5.93936	23.3877	1.32426e-06	1.71994e-05
BRADI_1g70390v3	1.80607	7.97091	23.3825	1.32781e-06	1.7234e-05
BRADI_5g00865v3	-2.96503	1.91544	23.3756	1.33259e-06	1.72845e-05
BRADI_1g72160v3	-1.28928	6.61357	23.3663	1.33904e-06	1.73566e-05
BRADI_3g47800v3	1.86095	3.24214	23.359	1.3441e-06	1.74105e-05
BRADI_1g33340v3	-1.05265	5.86917	23.353	1.34831e-06	1.74433e-05
BRADI_1g18960v3	-2.14082	4.048	23.3529	1.34843e-06	1.74433e-05
BRADI_1g00780v3	-2.2013	1.90129	23.3509	1.34979e-06	1.74493e-05
BRADI_2g31560v3	-1.44872	6.56125	23.3352	1.36083e-06	1.75726e-05
BRADI_4g38380v3	1.1442	3.57543	23.3348	1.36114e-06	1.75726e-05
BRADI_4g45320v3	2.42708	0.878432	23.3318	1.36326e-06	1.75882e-05
BRADI_2g59110v3	3.35911	1.73929	23.323	1.36953e-06	1.76574e-05
BRADI_3g38777v3	-3.38888	6.86649	23.3047	1.38262e-06	1.78143e-05
BRADI_3g04187v3	-1.59479	3.13365	23.3007	1.38551e-06	1.78275e-05
BRADI_3g48670v3	-3.65083	0.192668	23.2995	1.38638e-06	1.78275e-05
BRADI_3g18930v3	-1.117	6.63563	23.2994	1.3864e-06	1.78275e-05
BRADI_5g16050v3	2.31156	2.06917	23.2926	1.39131e-06	1.78788e-05
BRADI_2g25600v3	1.16729	6.75452	23.2805	1.40012e-06	1.79801e-05
BRADI_2g41550v3	1.8078	2.38538	23.2775	1.40228e-06	1.7996e-05
BRADI_2g23420v3	1.96896	2.13134	23.2495	1.42286e-06	1.8238e-05
BRADI_1g00600v3	7.04144	0.0630759	23.2493	1.42303e-06	1.8238e-05
BRADI_1g24800v3	2.99601	0.292234	23.2428	1.42782e-06	1.82875e-05
BRADI_3g15490v3	-1.62561	3.22533	23.2279	1.43898e-06	1.84119e-05
BRADI_1g54630v3	1.5858	4.61611	23.2272	1.43944e-06	1.84119e-05
BRADI_1g14020v3	2.28443	1.21726	23.2181	1.44628e-06	1.84872e-05
BRADI_4g00325v3	3.41983	0.0396878	23.2147	1.44883e-06	1.85076e-05
BRADI_3g38730v3	2.38191	3.41263	23.2091	1.45306e-06	1.85495e-05
BRADI_4g41527v3	-2.00891	6.45708	23.1935	1.46491e-06	1.86884e-05
BRADI_4g27040v3	-1.98812	7.70114	23.1795	1.4756e-06	1.8803e-05
BRADI_2g13860v3	-2.89506	5.21162	23.1792	1.47583e-06	1.8803e-05
BRADI_4g34370v3	1.24151	4.42796	23.1723	1.48113e-06	1.88582e-05
BRADI_4g27341v3	-4.6441	1.63167	23.1638	1.48768e-06	1.89292e-05
BRADI_2g07975v3	1.47949	2.18237	23.1527	1.49632e-06	1.90266e-05
BRADI_1g52330v3	-1.52792	4.63518	23.1457	1.50179e-06	1.90729e-05
BRADI_3g35740v3	1.23467	3.14815	23.1455	1.50192e-06	1.90729e-05
BRADI_1g75262v3	-1.45687	4.94479	23.1435	1.50351e-06	1.90805e-05
BRADI_4g41717v3	1.71756	3.61016	23.1421	1.50456e-06	1.90814e-05
BRADI_4g03360v3	1.51847	5.97388	23.133	1.51174e-06	1.91598e-05
BRADI_2g51670v3	-1.27939	4.00661	23.108	1.53154e-06	1.93982e-05
BRADI_1g53710v3	-2.01229	3.85006	23.1032	1.53534e-06	1.94336e-05
BRADI_3g01100v3	-2.0828	0.987818	23.0619	1.56866e-06	1.98424e-05
BRADI_1g74760v3	-1.16841	3.01891	23.0528	1.57609e-06	1.99234e-05
BRADI_1g17490v3	1.32031	4.87062	23.0406	1.5862e-06	2.00381e-05
BRADI_1g12030v3	4.42773	0.410468	23.0383	1.58807e-06	2.00488e-05
BRADI_2g60245v3	-2.38458	0.15926	23.0354	1.59048e-06	2.00581e-05
BRADI_4g30897v3	-1.19983	3.59551	23.0349	1.59088e-06	2.00581e-05
BRADI_1g33310v3	1.4071	5.71536	23.0278	1.59677e-06	2.01193e-05
BRADI_5g24770v3	-2.38759	0.645728	23.0232	1.60055e-06	2.01538e-05
BRADI_3g53530v3	-1.33197	6.81554	22.9772	1.63933e-06	2.06288e-05
BRADI_3g18820v3	-1.37047	8.98785	22.9453	1.66675e-06	2.09602e-05
BRADI_5g17070v3	1.00172	6.15197	22.9336	1.67696e-06	2.10749e-05
BRADI_5g24660v3	1.61407	4.79234	22.9296	1.6804e-06	2.11027e-05
BRADI_1g76470v3	-2.61448	10.7927	22.9286	1.68134e-06	2.11027e-05
BRADI_3g04681v3	-1.27422	3.92905	22.9208	1.68817e-06	2.11704e-05
BRADI_2g13580v3	1.51185	5.4952	22.9199	1.68892e-06	2.11704e-05
BRADI_4g36137v3	1.82094	3.18836	22.9167	1.69171e-06	2.11918e-05
BRADI_2g54260v3	-3.3211	2.0275	22.9046	1.70246e-06	2.13024e-05
BRADI_3g23040v3	-1.42268	6.20365	22.9043	1.70274e-06	2.13024e-05
BRADI_3g04154v3	-1.26066	6.10255	22.8889	1.71641e-06	2.14595e-05
BRADI_1g70300v3	1.21084	4.36353	22.8807	1.72378e-06	2.15378e-05
BRADI_2g11070v3	2.15372	1.48652	22.8593	1.74306e-06	2.17647e-05
BRADI_2g42080v3	1.29186	5.56171	22.8461	1.75509e-06	2.19008e-05
BRADI_3g46530v3	-1.03969	6.4714	22.8347	1.76553e-06	2.20169e-05
BRADI_1g12196v3	1.55261	2.24211	22.8104	1.78793e-06	2.22819e-05
BRADI_3g29840v3	-1.25523	6.08191	22.8082	1.79e-06	2.22934e-05
BRADI_2g02740v3	-1.06951	5.55696	22.7965	1.80092e-06	2.24151e-05
BRADI_4g30460v3	1.4608	2.18596	22.7892	1.80779e-06	2.24861e-05
BRADI_4g34940v3	1.81345	5.04692	22.7879	1.80897e-06	2.24864e-05
BRADI_3g32551v3	-1.13719	5.31812	22.7863	1.81055e-06	2.24916e-05
BRADI_1g33827v3	1.91083	3.33417	22.7811	1.81546e-06	2.25382e-05
BRADI_3g50430v3	1.43976	4.93238	22.7786	1.81775e-06	2.25522e-05
BRADI_1g42377v3	-0.97248	4.94941	22.7722	1.82386e-06	2.26115e-05
BRADI_5g23790v3	-2.19565	7.24721	22.7711	1.82486e-06	2.26115e-05
BRADI_4g28089v3	4.58847	-0.137595	22.7634	1.8322e-06	2.2688e-05
BRADI_3g03270v3	-1.72571	6.85437	22.7621	1.83348e-06	2.26894e-05
BRADI_1g60100v3	-1.98329	6.55529	22.7419	1.85281e-06	2.2914e-05
BRADI_5g08150v3	-2.33845	2.14178	22.7393	1.85535e-06	2.29307e-05
BRADI_1g21050v3	1.6577	3.27566	22.7318	1.86259e-06	2.30055e-05
BRADI_5g03810v3	1.10812	6.10715	22.7173	1.8767e-06	2.3165e-05
BRADI_3g07563v3	-2.36338	1.56591	22.7098	1.88403e-06	2.32232e-05
BRADI_2g10942v3	1.78906	4.22808	22.7095	1.88436e-06	2.32232e-05
BRADI_2g36740v3	2.51987	2.45112	22.7088	1.885e-06	2.32232e-05
BRADI_1g62940v3	-1.41406	7.29061	22.7041	1.88962e-06	2.32654e-05
BRADI_2g10420v3	2.54426	1.33336	22.6984	1.89523e-06	2.33196e-05
BRADI_2g06111v3	-2.72347	6.79253	22.6715	1.92195e-06	2.36334e-05
BRADI_4g15110v3	1.48296	3.24064	22.6576	1.9359e-06	2.37795e-05
BRADI_2g34580v3	-1.95734	9.0706	22.6572	1.93628e-06	2.37795e-05
BRADI_3g17326v3	-2.04608	1.40851	22.641	1.9527e-06	2.3966e-05
BRADI_4g13750v3	-2.24745	1.31439	22.6393	1.95441e-06	2.39718e-05
BRADI_1g35660v3	1.79898	4.19586	22.6345	1.95931e-06	2.40028e-05
BRADI_2g47191v3	1.47195	4.55359	22.6344	1.95941e-06	2.40028e-05
BRADI_4g40570v3	-2.59506	5.96286	22.6285	1.9655e-06	2.40622e-05
BRADI_2g24420v3	-1.81267	6.18462	22.6159	1.97842e-06	2.42051e-05
BRADI_3g52250v3	-1.51167	5.06388	22.6133	1.98108e-06	2.42224e-05
BRADI_1g60600v3	-2.20673	5.33738	22.5581	2.03887e-06	2.49132e-05
BRADI_2g01180v3	-1.43097	4.41427	22.5438	2.05406e-06	2.5083e-05
BRADI_3g41370v3	0.954607	6.08391	22.5277	2.0713e-06	2.5264e-05
BRADI_2g43900v3	-1.19492	5.60688	22.5276	2.07148e-06	2.5264e-05
BRADI_2g31690v3	-2.91326	4.77809	22.5225	2.07692e-06	2.53145e-05
BRADI_4g43580v3	1.52238	5.73108	22.5042	2.09684e-06	2.55411e-05
BRADI_1g06425v3	-1.60456	7.46233	22.4949	2.10705e-06	2.56494e-05
BRADI_1g14200v3	-2.33644	5.63005	22.4796	2.12382e-06	2.58374e-05
BRADI_2g59850v3	1.61312	4.66742	22.4768	2.12701e-06	2.586e-05
BRADI_1g20050v3	1.56804	4.63547	22.4733	2.1309e-06	2.5891e-05
BRADI_1g08410v3	2.27109	3.83013	22.467	2.13782e-06	2.59588e-05
BRADI_3g45700v3	-2.9183	8.3772	22.4464	2.16092e-06	2.62185e-05
BRADI_1g76870v3	-1.34633	4.41818	22.4455	2.1619e-06	2.62185e-05
BRADI_2g49870v3	-2.56388	6.39091	22.4412	2.16681e-06	2.62616e-05
BRADI_3g11370v3	-1.63287	5.34842	22.419	2.19193e-06	2.65495e-05
BRADI_5g02510v3	-1.93626	6.40593	22.416	2.19534e-06	2.65741e-05
BRADI_2g06080v3	-1.5733	7.97905	22.4132	2.19858e-06	2.65968e-05
BRADI_1g75087v3	-1.57456	3.85074	22.3981	2.21594e-06	2.67882e-05
BRADI_1g25588v3	4.73258	0.645161	22.397	2.21717e-06	2.67882e-05
BRADI_4g27050v3	-1.61041	7.12661	22.3745	2.24336e-06	2.70879e-05
BRADI_1g72457v3	-3.05823	1.26796	22.3659	2.25338e-06	2.71919e-05
BRADI_3g10210v3	1.16143	6.70281	22.3623	2.25759e-06	2.72257e-05
BRADI_3g52740v3	-1.69943	8.48454	22.3473	2.27536e-06	2.7423e-05
BRADI_5g13310v3	-1.17615	4.72662	22.3233	2.30399e-06	2.77508e-05
BRADI_4g38440v3	-1.41577	7.70098	22.3214	2.30619e-06	2.77587e-05
BRADI_2g13510v3	1.6862	2.9304	22.3203	2.30751e-06	2.77587e-05
BRADI_1g19730v3	-3.89393	5.61067	22.3138	2.31541e-06	2.78366e-05
BRADI_3g56740v3	0.970378	4.76845	22.2978	2.33475e-06	2.80517e-05
BRADI_3g28886v3	1.44536	5.31861	22.2947	2.33849e-06	2.80792e-05
BRADI_1g12280v3	-3.26051	5.95295	22.2533	2.38947e-06	2.86736e-05
BRADI_4g40785v3	-2.82098	3.04858	22.245	2.39987e-06	2.87685e-05
BRADI_1g08190v3	-2.50718	7.11529	22.2446	2.40034e-06	2.87685e-05
BRADI_2g41280v3	2.05151	1.17672	22.2375	2.40919e-06	2.88567e-05
BRADI_1g11510v3	-2.96914	2.21645	22.2336	2.41412e-06	2.88886e-05
BRADI_1g59860v3	-1.97757	7.73066	22.233	2.41482e-06	2.88886e-05
BRADI_1g45090v3	-1.47972	6.29166	22.2197	2.4317e-06	2.90726e-05
BRADI_2g24106v3	2.65318	1.88918	22.211	2.44268e-06	2.91858e-05
BRADI_4g20160v3	-1.10723	5.64975	22.1843	2.4769e-06	2.95765e-05
BRADI_1g29070v3	3.25829	0.901898	22.1825	2.47917e-06	2.95854e-05
BRADI_1g07190v3	1.50017	2.01593	22.1686	2.49718e-06	2.9782e-05
BRADI_1g78740v3	1.53613	2.90231	22.1529	2.51775e-06	3.00089e-05
BRADI_3g41282v3	-1.40344	4.18192	22.149	2.52287e-06	3.00514e-05
BRADI_5g23480v3	-2.70646	1.47021	22.1462	2.52662e-06	3.00776e-05
BRADI_4g13600v3	2.0935	1.33348	22.1252	2.55429e-06	3.03883e-05
BRADI_4g08820v3	1.21782	7.57933	22.1234	2.55672e-06	3.03986e-05
BRADI_1g74540v3	1.50562	3.36879	22.106	2.58004e-06	3.06572e-05
BRADI_5g23400v3	-2.35602	0.134412	22.1038	2.58297e-06	3.06731e-05
BRADI_4g30681v3	6.94989	-0.00983186	22.0966	2.59273e-06	3.07702e-05
BRADI_1g24640v3	2.47208	1.9201	22.0944	2.59564e-06	3.07859e-05
BRADI_4g22060v3	5.97386	-0.747233	22.0787	2.617e-06	3.10204e-05
BRADI_2g31660v3	-1.39848	5.56352	22.0772	2.61902e-06	3.10254e-05
BRADI_1g73960v3	1.49362	2.27647	22.0744	2.62288e-06	3.10521e-05
BRADI_3g36920v3	-1.28971	6.19402	22.0536	2.65147e-06	3.13714e-05
BRADI_4g10450v3	-1.18058	5.08961	22.0464	2.66143e-06	3.147e-05
BRADI_1g45050v3	1.28877	7.54801	22.0374	2.67392e-06	3.15985e-05
BRADI_1g31130v3	-2.5085	0.681712	22.0237	2.69302e-06	3.18049e-05
BRADI_2g07710v3	-1.14445	3.96164	22.0171	2.70237e-06	3.18959e-05
BRADI_3g13570v3	-1.51563	2.60139	22.0115	2.71023e-06	3.19691e-05
BRADI_4g15090v3	1.00319	6.53753	22.0075	2.71594e-06	3.20171e-05
BRADI_5g26670v3	-1.09331	5.38796	21.9938	2.7353e-06	3.22257e-05
BRADI_1g67170v3	-1.80194	6.75119	21.9813	2.75315e-06	3.24163e-05
BRADI_3g29310v3	1.81702	1.4042	21.9701	2.76938e-06	3.25876e-05
BRADI_5g16100v3	2.19105	4.0088	21.9657	2.7757e-06	3.26387e-05
BRADI_3g42350v3	-4.08133	4.02901	21.9647	2.77708e-06	3.26387e-05
BRADI_2g17990v3	1.7092	3.60814	21.9476	2.80195e-06	3.2911e-05
BRADI_4g01490v3	-1.03742	4.94353	21.9329	2.82349e-06	3.3144e-05
BRADI_2g44530v3	-1.87058	3.13818	21.918	2.84555e-06	3.33827e-05
BRADI_1g53670v3	-1.83095	2.03805	21.8978	2.87558e-06	3.37147e-05
BRADI_1g64267v3	-1.29705	9.02381	21.8963	2.87789e-06	3.37214e-05
BRADI_1g03550v3	-1.08329	5.03951	21.8828	2.89826e-06	3.39396e-05
BRADI_1g43570v3	1.88114	3.57103	21.8785	2.90464e-06	3.39938e-05
BRADI_2g57770v3	1.08504	4.04636	21.8669	2.92236e-06	3.41806e-05
BRADI_5g16950v3	-1.74621	2.55993	21.8487	2.9501e-06	3.44842e-05
BRADI_3g18051v3	-1.30217	4.86157	21.8446	2.9564e-06	3.4537e-05
BRADI_3g07040v3	-1.21101	3.58475	21.8435	2.95819e-06	3.45371e-05
BRADI_5g09491v3	-1.38528	3.41668	21.8338	2.97311e-06	3.4675e-05
BRADI_2g45670v3	-1.04641	4.8331	21.8335	2.97357e-06	3.4675e-05
BRADI_1g06160v3	-2.12035	7.92369	21.8293	2.98009e-06	3.47302e-05
BRADI_1g62170v3	-1.58091	7.97081	21.7953	3.03347e-06	3.5331e-05
BRADI_1g20390v3	-1.17855	4.40498	21.7922	3.03828e-06	3.53658e-05
BRADI_4g39570v3	-1.17609	7.39578	21.7808	3.0565e-06	3.55565e-05
BRADI_2g51716v3	-2.47754	2.54018	21.7794	3.05863e-06	3.556e-05
BRADI_2g52070v3	-1.21742	6.89185	21.7734	3.06831e-06	3.56512e-05
BRADI_4g40010v3	-3.63554	2.26733	21.7552	3.0975e-06	3.59688e-05
BRADI_1g55740v3	-1.9784	8.54845	21.7504	3.10524e-06	3.60371e-05
BRADI_3g59447v3	-2.02602	1.50024	21.7371	3.12686e-06	3.62664e-05
BRADI_2g61285v3	6.7388	-0.173156	21.7171	3.15969e-06	3.66252e-05
BRADI_5g05070v3	-1.33618	4.54791	21.7074	3.17568e-06	3.67886e-05
BRADI_3g20520v3	-1.31551	8.08531	21.6843	3.21415e-06	3.7212e-05
BRADI_3g15890v3	1.48402	3.73723	21.6817	3.21851e-06	3.72403e-05
BRADI_5g01410v3	-1.66962	8.36097	21.6736	3.23208e-06	3.7375e-05
BRADI_1g49840v3	-2.88457	0.475253	21.6629	3.25024e-06	3.75626e-05
BRADI_2g61580v3	-0.956267	4.99816	21.6571	3.26001e-06	3.76531e-05
BRADI_1g05804v3	-1.27036	3.81018	21.6476	3.27628e-06	3.78123e-05
BRADI_4g36761v3	2.37878	1.91265	21.6467	3.27769e-06	3.78123e-05
BRADI_3g56126v3	1.70332	4.56645	21.6251	3.31493e-06	3.82192e-05
BRADI_4g39269v3	-1.71961	3.64427	21.6124	3.33691e-06	3.84497e-05
BRADI_4g12970v3	-1.74627	2.54575	21.5912	3.37403e-06	3.88545e-05
BRADI_4g05960v3	-1.03417	5.01027	21.5854	3.38412e-06	3.89475e-05
BRADI_3g57220v3	-1.15191	6.81911	21.5842	3.38626e-06	3.8949e-05
BRADI_4g39870v3	-3.31364	3.76551	21.5825	3.3893e-06	3.89609e-05
BRADI_3g06680v3	1.36809	3.62277	21.5794	3.39483e-06	3.90014e-05
BRADI_5g10980v3	1.65743	2.99559	21.5673	3.41626e-06	3.92244e-05
BRADI_5g25070v3	-1.3004	7.09397	21.561	3.42757e-06	3.93309e-05
BRADI_1g47030v3	-3.48527	5.76013	21.546	3.45445e-06	3.96159e-05
BRADI_3g35700v3	-3.24753	6.92889	21.5447	3.45671e-06	3.96185e-05
BRADI_2g09434v3	-1.39195	2.55487	21.5382	3.46843e-06	3.97145e-05
BRADI_1g63460v3	-1.59958	4.47083	21.5369	3.47078e-06	3.97145e-05
BRADI_3g21317v3	-1.14816	2.92924	21.5365	3.47162e-06	3.97145e-05
BRADI_3g07860v3	-2.23732	3.74207	21.5356	3.47328e-06	3.97145e-05
BRADI_1g76880v3	-1.45573	5.93436	21.5306	3.48224e-06	3.97935e-05
BRADI_3g43180v3	-1.50578	5.75309	21.5225	3.49694e-06	3.9938e-05
BRADI_3g58780v3	-1.35501	6.08474	21.5157	3.50948e-06	4.00576e-05
BRADI_1g56270v3	-3.85127	-0.114608	21.4926	3.55197e-06	4.05088e-05
BRADI_3g37390v3	1.39752	2.70124	21.4919	3.55318e-06	4.05088e-05
BRADI_1g58080v3	0.937012	5.74703	21.4858	3.56462e-06	4.06153e-05
BRADI_4g15200v3	1.85622	4.31364	21.4597	3.61339e-06	4.11468e-05
BRADI_2g51540v3	-1.83553	4.96696	21.4578	3.61705e-06	4.11644e-05
BRADI_4g12940v3	-1.02917	4.61769	21.444	3.64318e-06	4.14374e-05
BRADI_4g00340v3	6.66157	-0.235552	21.4352	3.65996e-06	4.15805e-05
BRADI_5g21310v3	-1.41619	7.37424	21.4351	3.66004e-06	4.15805e-05
BRADI_1g65825v3	-2.31281	4.12281	21.431	3.66788e-06	4.16451e-05
BRADI_2g27030v3	-1.49176	5.41765	21.4275	3.67462e-06	4.16973e-05
BRADI_3g21230v3	1.54531	2.64993	21.4105	3.70738e-06	4.20444e-05
BRADI_3g30150v3	-1.31966	6.89064	21.4013	3.72528e-06	4.22227e-05
BRADI_2g21142v3	-1.63726	2.82151	21.3577	3.81085e-06	4.31674e-05
BRADI_3g29750v3	-1.1409	7.54189	21.3554	3.81551e-06	4.31949e-05
BRADI_2g26287v3	-1.25762	3.04074	21.3523	3.82156e-06	4.32382e-05
BRADI_3g55020v3	1.3179	4.88854	21.3429	3.84038e-06	4.34258e-05
BRADI_3g43137v3	0.902605	5.93478	21.34	3.84617e-06	4.34629e-05
BRADI_1g22270v3	-1.87263	6.62636	21.339	3.84814e-06	4.34629e-05
BRADI_4g40270v3	-2.08705	3.23274	21.3248	3.87684e-06	4.37616e-05
BRADI_3g06556v3	1.36044	2.92337	21.3227	3.88112e-06	4.37845e-05
BRADI_1g53867v3	1.00836	6.18824	21.3174	3.89187e-06	4.38802e-05
BRADI_3g30740v3	-0.961562	4.96727	21.3105	3.90578e-06	4.39881e-05
BRADI_2g60445v3	-1.20668	4.75268	21.3104	3.90597e-06	4.39881e-05
BRADI_2g48120v3	-0.996247	4.01312	21.3005	3.92631e-06	4.41915e-05
BRADI_1g36250v3	-1.01739	5.56959	21.2803	3.96785e-06	4.46332e-05
BRADI_2g47610v3	-1.40205	7.15636	21.2677	3.9941e-06	4.49023e-05
BRADI_1g05620v3	-1.75984	4.93897	21.2418	4.04832e-06	4.54856e-05
BRADI_3g46030v3	-2.22078	1.50748	21.2401	4.05188e-06	4.54936e-05
BRADI_1g00540v3	2.64192	0.394927	21.2393	4.05372e-06	4.54936e-05
BRADI_2g59240v3	-1.54764	6.52411	21.2248	4.08448e-06	4.58122e-05
BRADI_1g24860v3	-1.1629	9.24827	21.2233	4.08766e-06	4.58215e-05
BRADI_2g44846v3	-1.87467	0.970708	21.207	4.12253e-06	4.61857e-05
BRADI_3g34375v3	-2.50817	3.76867	21.2051	4.12676e-06	4.62063e-05
BRADI_3g40420v3	3.19852	0.430073	21.194	4.15053e-06	4.64457e-05
BRADI_3g36160v3	-1.7758	1.64446	21.1904	4.15839e-06	4.65069e-05
BRADI_3g34517v3	-1.96979	6.98114	21.1884	4.16285e-06	4.65299e-05
BRADI_1g43900v3	-4.13604	0.415233	21.156	4.23381e-06	4.72699e-05
BRADI_4g16093v3	-5.52076	3.17487	21.1559	4.23392e-06	4.72699e-05
BRADI_1g34525v3	-1.53675	8.32425	21.1458	4.25638e-06	4.74932e-05
BRADI_1g70820v3	-1.95773	5.37374	21.1202	4.31368e-06	4.8105e-05
BRADI_3g30260v3	-1.52397	7.59361	21.1151	4.32517e-06	4.819e-05
BRADI_2g07227v3	-2.6284	4.98326	21.1146	4.32627e-06	4.819e-05
BRADI_3g46140v3	-1.33728	4.74274	21.1118	4.33248e-06	4.82315e-05
BRADI_5g24220v3	1.96514	5.03633	21.1056	4.34659e-06	4.83608e-05
BRADI_1g71540v3	-1.27108	4.21653	21.0997	4.35996e-06	4.84818e-05
BRADI_3g18636v3	-3.53294	2.45909	21.0899	4.3823e-06	4.87023e-05
BRADI_4g45190v3	-1.46285	6.41428	21.0837	4.3965e-06	4.88111e-05
BRADI_1g62300v3	1.17012	7.92139	21.0834	4.39713e-06	4.88111e-05
BRADI_5g12547v3	-1.2796	4.03224	21.0767	4.41273e-06	4.89563e-05
BRADI_1g19790v3	-1.81785	4.59572	21.0622	4.44616e-06	4.9299e-05
BRADI_4g43327v3	3.54854	0.891021	21.0556	4.4614e-06	4.94339e-05
BRADI_5g26090v3	-3.34536	3.23474	21.0548	4.46342e-06	4.94339e-05
BRADI_1g29446v3	1.37689	2.34327	21.0516	4.47073e-06	4.94866e-05
BRADI_1g44317v3	1.69062	4.42736	21.0481	4.47889e-06	4.95487e-05
BRADI_3g20720v3	-2.40462	3.87459	21.0436	4.48943e-06	4.9637e-05
BRADI_5g25000v3	6.05841	-0.684592	21.0376	4.50357e-06	4.9765e-05
BRADI_5g17740v3	-1.96366	5.07488	21.0316	4.51777e-06	4.98935e-05
BRADI_4g01080v3	1.76464	4.2633	21.026	4.53083e-06	5.00092e-05
BRADI_2g19030v3	1.01085	5.13706	21.0203	4.54452e-06	5.01319e-05
BRADI_5g15655v3	-1.33486	3.07764	21.015	4.55701e-06	5.02411e-05
BRADI_2g31480v3	1.8458	4.3139	21.0085	4.57262e-06	5.03845e-05
BRADI_2g38577v3	1.02358	5.2621	21.0005	4.59172e-06	5.05662e-05
BRADI_2g45070v3	1.04639	5.20985	20.9986	4.59629e-06	5.05879e-05
BRADI_1g33950v3	-2.15565	4.79269	20.9933	4.60887e-06	5.06976e-05
BRADI_4g23695v3	-2.62578	7.66695	20.9849	4.62912e-06	5.08915e-05
BRADI_3g25370v3	-1.35542	5.4838	20.9794	4.64256e-06	5.10103e-05
ENSRNA049997750	2.40089	1.46128	20.9565	4.69833e-06	5.15939e-05
BRADI_2g41630v3	-1.15187	7.02754	20.9497	4.71493e-06	5.17469e-05
BRADI_3g01143v3	-1.86857	1.91863	20.9444	4.72806e-06	5.18617e-05
BRADI_3g11960v3	-1.004	4.96181	20.9343	4.75296e-06	5.21053e-05
BRADI_2g59660v3	-2.6104	6.90408	20.9278	4.7693e-06	5.2255e-05
BRADI_2g36866v3	-3.45377	-0.382492	20.9266	4.77227e-06	5.2258e-05
BRADI_5g08820v3	-1.34452	8.41853	20.9245	4.77735e-06	5.22841e-05
BRADI_1g44190v3	-1.93324	5.62578	20.922	4.78381e-06	5.23253e-05
BRADI_1g45440v3	4.73286	-0.0196112	20.9175	4.79486e-06	5.24166e-05
BRADI_1g25330v3	-2.79652	1.76022	20.9126	4.80727e-06	5.25227e-05
BRADI_1g19240v3	-1.12247	6.56877	20.9004	4.83786e-06	5.28271e-05
BRADI_1g69393v3	-1.47464	4.25245	20.888	4.86943e-06	5.3142e-05
BRADI_1g56860v3	-5.83621	5.15307	20.8741	4.90485e-06	5.3471e-05
BRADI_4g23080v3	-1.08574	5.29679	20.874	4.90509e-06	5.3471e-05
BRADI_2g33686v3	-1.93485	2.19469	20.8572	4.9484e-06	5.39128e-05
BRADI_1g73700v3	-1.13202	4.34319	20.8519	4.96207e-06	5.40315e-05
BRADI_3g52807v3	-3.56804	2.42875	20.8506	4.96542e-06	5.40376e-05
BRADI_2g48920v3	-1.13437	6.20602	20.8472	4.97407e-06	5.41014e-05
BRADI_4g08824v3	-2.18783	0.984623	20.8456	4.97836e-06	5.41177e-05
BRADI_3g55970v3	5.32658	0.439416	20.8373	4.99995e-06	5.4322e-05
BRADI_3g60557v3	-1.31546	2.77667	20.8301	5.01883e-06	5.44966e-05
BRADI_5g02990v3	-1.40891	5.71687	20.8243	5.03396e-06	5.46303e-05
BRADI_3g51920v3	-2.05384	5.10732	20.8196	5.04627e-06	5.47333e-05
BRADI_3g50440v3	1.65211	4.19297	20.8147	5.05942e-06	5.48452e-05
BRADI_4g12814v3	3.82292	0.707421	20.8068	5.08034e-06	5.50413e-05
BRADI_1g64978v3	-1.27117	4.8687	20.8035	5.0889e-06	5.51033e-05
BRADI_1g39318v3	2.02298	2.33984	20.8022	5.09243e-06	5.51107e-05
BRADI_1g69827v3	-1.34288	4.10757	20.7944	5.11323e-06	5.5293e-05
BRADI_1g27450v3	-1.06837	6.6421	20.7937	5.11497e-06	5.5293e-05
BRADI_5g09861v3	-1.964	2.71126	20.788	5.13035e-06	5.54283e-05
BRADI_1g28330v3	-3.22068	8.68258	20.7862	5.13528e-06	5.54507e-05
BRADI_3g28450v3	2.57178	2.91091	20.7759	5.16285e-06	5.57175e-05
BRADI_3g05790v3	-1.81591	1.59301	20.7623	5.19972e-06	5.60841e-05
BRADI_4g29290v3	-2.16187	4.16143	20.7607	5.204e-06	5.60991e-05
BRADI_5g22000v3	1.0784	4.59612	20.7499	5.23335e-06	5.63842e-05
BRADI_2g43797v3	2.93873	1.06929	20.7473	5.24055e-06	5.64305e-05
BRADI_3g04140v3	-1.75677	6.28369	20.7127	5.33607e-06	5.74271e-05
BRADI_1g09615v3	-1.20707	6.57601	20.7096	5.3448e-06	5.74892e-05
BRADI_1g16710v3	-2.41095	2.65171	20.7048	5.35815e-06	5.76008e-05
BRADI_2g01504v3	-1.24056	5.28174	20.702	5.36604e-06	5.76234e-05
BRADI_2g07630v3	-1.79377	4.56813	20.7019	5.36619e-06	5.76234e-05
BRADI_4g07248v3	1.01146	4.71258	20.6984	5.37622e-06	5.76992e-05
BRADI_5g10737v3	-1.89706	3.31711	20.6867	5.40917e-06	5.80029e-05
BRADI_3g33870v3	3.76926	0.633445	20.6862	5.41049e-06	5.80029e-05
BRADI_3g05226v3	-1.18639	5.89905	20.6836	5.41785e-06	5.80497e-05
BRADI_2g12150v3	1.95863	6.59944	20.6755	5.44076e-06	5.8263e-05
BRADI_1g27280v3	-2.32457	6.99863	20.6705	5.45507e-06	5.8384e-05
BRADI_3g38640v3	-1.40164	7.92198	20.6613	5.48122e-06	5.86054e-05
BRADI_3g40190v3	-2.46408	6.60628	20.6611	5.4818e-06	5.86054e-05
BRADI_1g46300v3	5.31248	0.454258	20.6598	5.48548e-06	5.86124e-05
BRADI_5g05166v3	-1.72576	2.18611	20.6578	5.49119e-06	5.86319e-05
BRADI_3g00513v3	-2.48598	0.751609	20.6571	5.49334e-06	5.86319e-05
BRADI_4g37410v3	-2.1911	7.88603	20.6311	5.56856e-06	5.9402e-05
BRADI_1g07330v3	-2.28345	1.6794	20.6281	5.57728e-06	5.9443e-05
BRADI_1g29500v3	-2.21309	7.77226	20.6276	5.57852e-06	5.9443e-05
BRADI_5g21030v3	1.6064	1.60187	20.6235	5.59056e-06	5.95386e-05
BRADI_4g41430v3	-2.75725	5.36428	20.6204	5.59974e-06	5.96036e-05
BRADI_4g00996v3	2.2058	0.816327	20.6179	5.60702e-06	5.96483e-05
BRADI_1g45710v3	2.88491	4.69287	20.5903	5.68845e-06	6.04815e-05
BRADI_4g43610v3	-2.44729	-0.114651	20.5888	5.69286e-06	6.04952e-05
BRADI_1g42990v3	1.0005	5.07203	20.5839	5.70735e-06	6.0616e-05
BRADI_2g06460v3	-3.23086	2.26893	20.5756	5.73217e-06	6.08136e-05
BRADI_1g50620v3	-1.95442	4.45117	20.5756	5.73223e-06	6.08136e-05
BRADI_5g09940v3	-1.37977	4.38805	20.5696	5.75013e-06	6.09411e-05
BRADI_5g15418v3	4.5549	0.961248	20.5691	5.75177e-06	6.09411e-05
BRADI_4g38130v3	3.09944	1.3009	20.5684	5.75367e-06	6.09411e-05
BRADI_4g31257v3	-1.96679	6.34259	20.5562	5.79044e-06	6.12972e-05
BRADI_2g04070v3	1.01961	4.77116	20.5497	5.81018e-06	6.147e-05
BRADI_4g14840v3	-1.04166	6.33424	20.5477	5.81623e-06	6.147e-05
BRADI_2g58860v3	-2.14276	7.35178	20.5462	5.82107e-06	6.147e-05
BRADI_3g59130v3	-2.38162	9.49926	20.5457	5.82231e-06	6.147e-05
BRADI_3g16460v3	3.92671	0.00975497	20.5456	5.8226e-06	6.147e-05
BRADI_2g54430v3	-2.66481	4.53208	20.5429	5.83102e-06	6.15253e-05
BRADI_3g33860v3	1.42305	6.22393	20.5381	5.84561e-06	6.16457e-05
BRADI_2g61410v3	-1.29606	6.45948	20.52	5.90122e-06	6.21984e-05
BRADI_2g10530v3	0.966041	6.43851	20.5159	5.91377e-06	6.22968e-05
BRADI_4g40740v3	-2.20695	9.67475	20.5026	5.95489e-06	6.2696e-05
BRADI_4g11360v3	-1.44332	3.72419	20.4917	5.98889e-06	6.30112e-05
BRADI_3g31590v3	-2.01534	5.9519	20.491	5.99132e-06	6.30112e-05
BRADI_2g11005v3	-1.65554	6.62864	20.4871	6.00357e-06	6.30771e-05
BRADI_2g24030v3	1.05683	6.02645	20.4869	6.00409e-06	6.30771e-05
BRADI_4g21190v3	1.25819	3.05242	20.4697	6.05826e-06	6.36117e-05
BRADI_3g05437v3	-1.75892	5.10979	20.4316	6.1801e-06	6.4856e-05
BRADI_2g59740v3	-1.15811	2.92112	20.4251	6.20108e-06	6.5041e-05
BRADI_1g75730v3	2.59683	4.31689	20.4147	6.23485e-06	6.53599e-05
BRADI_3g05296v3	-3.94624	3.49641	20.4023	6.27541e-06	6.57284e-05
BRADI_2g33670v3	-4.59714	1.77579	20.4017	6.27736e-06	6.57284e-05
BRADI_1g07340v3	-1.32377	5.35427	20.4009	6.28017e-06	6.57284e-05
BRADI_1g15800v3	1.45211	7.16988	20.3891	6.31897e-06	6.60989e-05
BRADI_4g00730v3	1.08195	4.61347	20.3878	6.32316e-06	6.6107e-05
BRADI_1g28760v3	1.17023	8.06025	20.3862	6.32835e-06	6.61256e-05
BRADI_3g32100v3	-3.28133	8.28011	20.3838	6.33638e-06	6.61739e-05
BRADI_3g40370v3	-4.57431	0.423296	20.3592	6.41822e-06	6.69926e-05
BRADI_3g10150v3	-1.15044	6.38704	20.3534	6.43774e-06	6.71602e-05
BRADI_4g36710v3	1.7636	2.63353	20.3474	6.45799e-06	6.73208e-05
BRADI_3g52180v3	-1.52827	1.87778	20.3468	6.46007e-06	6.73208e-05
BRADI_2g34407v3	-1.19779	3.44802	20.342	6.47618e-06	6.74265e-05
BRADI_3g06380v3	1.09484	6.62443	20.3418	6.47717e-06	6.74265e-05
BRADI_5g09777v3	-1.43958	3.76038	20.3403	6.48193e-06	6.74399e-05
BRADI_2g45830v3	-1.34669	5.50778	20.3284	6.52248e-06	6.78254e-05
BRADI_1g59990v3	-1.15067	5.50488	20.3246	6.53558e-06	6.79252e-05
BRADI_4g35780v3	1.34626	3.25902	20.3146	6.56961e-06	6.82424e-05
BRADI_2g08707v3	-2.31495	2.95595	20.3083	6.59135e-06	6.84315e-05
BRADI_2g62660v3	1.26163	4.59262	20.3025	6.61145e-06	6.86035e-05
BRADI_3g17780v3	1.38989	4.05309	20.2953	6.63641e-06	6.88257e-05
BRADI_3g54236v3	-1.49209	5.81917	20.2894	6.65681e-06	6.89705e-05
BRADI_4g03397v3	-1.12854	4.77197	20.2892	6.65748e-06	6.89705e-05
BRADI_3g56240v3	1.69463	4.17058	20.2862	6.66813e-06	6.9044e-05
BRADI_2g36330v3	1.57158	2.71464	20.271	6.72128e-06	6.95571e-05
BRADI_3g15495v3	-1.60852	3.68951	20.2524	6.7868e-06	7.01978e-05
BRADI_5g16900v3	-2.13369	5.1621	20.2495	6.79724e-06	7.02683e-05
BRADI_4g22110v3	-1.24961	5.46499	20.2442	6.81611e-06	7.04259e-05
BRADI_2g21460v3	1.08408	7.57342	20.2384	6.83651e-06	7.05991e-05
BRADI_4g05890v3	-1.3042	3.69018	20.2307	6.86432e-06	7.08485e-05
BRADI_4g41940v3	-1.45243	2.77336	20.2176	6.91156e-06	7.12982e-05
BRADI_3g19073v3	-3.12319	-0.192512	20.214	6.92433e-06	7.13919e-05
BRADI_1g60972v3	-1.34824	2.80261	20.2012	6.97105e-06	7.18355e-05
BRADI_4g28350v3	-2.28232	8.02225	20.1948	6.99437e-06	7.20375e-05
BRADI_3g46270v3	-1.18263	3.57392	20.1912	7.00754e-06	7.20982e-05
BRADI_3g02570v3	-1.34476	6.37086	20.1911	7.00769e-06	7.20982e-05
BRADI_2g08701v3	-2.46759	4.98073	20.1871	7.02254e-06	7.22127e-05
BRADI_2g58040v3	-1.21163	6.31023	20.1814	7.04361e-06	7.2391e-05
BRADI_1g01630v3	1.36347	4.98629	20.1704	7.08399e-06	7.27674e-05
BRADI_3g03380v3	1.08433	5.46456	20.1587	7.12755e-06	7.31658e-05
BRADI_2g38080v3	1.84616	1.15496	20.158	7.13031e-06	7.31658e-05
BRADI_1g19050v3	1.19568	3.13521	20.1537	7.14618e-06	7.32898e-05
BRADI_1g25657v3	-1.09823	4.47293	20.1263	7.24915e-06	7.4281e-05
BRADI_1g62063v3	-2.23428	3.33519	20.126	7.25048e-06	7.4281e-05
BRADI_5g22940v3	-2.5934	2.96017	20.1196	7.27465e-06	7.44893e-05
BRADI_2g57590v3	-2.05674	9.45098	20.1155	7.2904e-06	7.46112e-05
BRADI_2g19680v3	-1.54941	3.03767	20.1085	7.31704e-06	7.48444e-05
BRADI_1g49770v3	-2.17709	7.75664	20.1036	7.33589e-06	7.49977e-05
BRADI_2g59290v3	-5.15262	-0.449321	20.0827	7.41642e-06	7.5781e-05
BRADI_2g51610v3	-0.977149	7.17508	20.0733	7.45284e-06	7.61131e-05
BRADI_2g58013v3	-1.51087	6.60057	20.0662	7.48074e-06	7.63578e-05
BRADI_3g41730v3	1.66019	3.92384	20.0601	7.50464e-06	7.65616e-05
BRADI_1g41990v3	1.01785	5.38422	20.0552	7.52402e-06	7.67189e-05
BRADI_2g52730v3	-1.98363	6.1087	20.0422	7.57511e-06	7.71993e-05
BRADI_5g17360v3	-1.64295	5.63052	20.0333	7.61034e-06	7.75176e-05
BRADI_3g20106v3	1.38375	5.62686	20.0278	7.63251e-06	7.76941e-05
BRADI_4g08500v3	-4.01787	13.6177	20.027	7.63568e-06	7.76941e-05
BRADI_3g35850v3	1.25263	6.09092	20.014	7.68781e-06	7.81836e-05
BRADI_2g34460v3	-1.39162	6.32044	20.0099	7.7041e-06	7.83006e-05
BRADI_2g50526v3	-2.05688	7.6633	20.0091	7.70739e-06	7.83006e-05
BRADI_5g19727v3	-2.84612	2.65155	20.0064	7.7182e-06	7.83695e-05
BRADI_1g57100v3	-1.42083	1.91153	19.9917	7.77794e-06	7.89347e-05
BRADI_2g57687v3	-1.07886	4.17707	19.9736	7.85191e-06	7.96437e-05
BRADI_1g34060v3	0.895896	4.43683	19.9697	7.86776e-06	7.973e-05
BRADI_3g29210v3	-2.19982	3.06552	19.9695	7.86863e-06	7.973e-05
BRADI_3g31510v3	-2.24071	3.17161	19.9616	7.9013e-06	7.9982e-05
BRADI_1g01190v3	4.90993	0.104074	19.9606	7.90552e-06	7.9982e-05
BRADI_1g30811v3	-1.48098	6.82863	19.9605	7.90586e-06	7.9982e-05
BRADI_5g16980v3	-1.56923	9.14754	19.9535	7.93467e-06	8.02315e-05
BRADI_2g60705v3	-1.86603	2.53668	19.9463	7.96481e-06	8.04739e-05
BRADI_5g18980v3	-1.24813	4.08647	19.9454	7.96858e-06	8.04739e-05
BRADI_3g43850v3	2.44087	1.09344	19.9448	7.97108e-06	8.04739e-05
BRADI_1g66790v3	-2.00853	3.90861	19.9365	8.00578e-06	8.07822e-05
BRADI_4g41820v3	-1.26401	5.66043	19.9317	8.02574e-06	8.09416e-05
BRADI_3g43930v3	-1.27278	5.55859	19.9207	8.07232e-06	8.1369e-05
BRADI_3g47340v3	1.81832	2.93733	19.9167	8.08897e-06	8.14945e-05
BRADI_2g23650v3	1.35656	5.17188	19.9131	8.10426e-06	8.16062e-05
BRADI_2g48657v3	-1.25552	7.05871	19.908	8.12583e-06	8.17809e-05
BRADI_1g52740v3	2.14098	1.88428	19.9038	8.14396e-06	8.19209e-05
BRADI_2g51860v3	-2.27799	3.99004	19.8955	8.17938e-06	8.22345e-05
BRADI_3g52900v3	1.20309	5.53891	19.877	8.25883e-06	8.29904e-05
BRADI_2g08826v3	-1.82031	3.63854	19.8553	8.35297e-06	8.38928e-05
BRADI_4g44410v3	2.37547	11.9234	19.8537	8.36009e-06	8.3921e-05
BRADI_1g59870v3	-1.6853	7.88082	19.8479	8.38567e-06	8.41342e-05
BRADI_3g14790v3	-0.933326	6.27887	19.8376	8.43094e-06	8.45447e-05
BRADI_4g28767v3	-1.29558	5.84055	19.8361	8.43733e-06	8.4565e-05
BRADI_4g42540v3	-2.32526	1.75297	19.8237	8.49244e-06	8.50735e-05
BRADI_2g36480v3	-2.25652	10.0987	19.8196	8.51073e-06	8.52127e-05
BRADI_1g07650v3	1.14561	5.27598	19.8165	8.52437e-06	8.53052e-05
BRADI_3g20120v3	1.08441	5.97653	19.806	8.57123e-06	8.573e-05
BRADI_4g05590v3	1.15788	3.23605	19.8022	8.58819e-06	8.58554e-05
BRADI_1g50897v3	-2.48512	5.59866	19.7907	8.64024e-06	8.62523e-05
BRADI_2g02030v3	1.29967	2.86575	19.7905	8.6412e-06	8.62523e-05
BRADI_1g70440v3	-1.95584	3.13481	19.7905	8.64123e-06	8.62523e-05
BRADI_5g22930v3	-1.60002	2.59264	19.7878	8.65348e-06	8.63301e-05
BRADI_1g10580v3	2.13194	2.63907	19.7735	8.71833e-06	8.69324e-05
BRADI_4g25900v3	-2.85489	9.28215	19.7671	8.74759e-06	8.71794e-05
BRADI_4g22090v3	-2.15089	5.15885	19.7607	8.77699e-06	8.74275e-05
BRADI_3g52600v3	0.956577	4.21806	19.75	8.82597e-06	8.78702e-05
BRADI_3g20480v3	-1.08566	3.98549	19.7416	8.8649e-06	8.82126e-05
BRADI_3g59040v3	-2.22464	0.543383	19.7205	8.96361e-06	8.91491e-05
BRADI_1g50280v3	-1.67303	4.81851	19.7112	9.00727e-06	8.94982e-05
BRADI_1g54030v3	-2.72621	7.63829	19.711	9.00794e-06	8.94982e-05
BRADI_3g46800v3	1.29941	6.20175	19.7098	9.01364e-06	8.95091e-05
BRADI_3g31450v3	2.63176	0.668588	19.7074	9.02491e-06	8.95752e-05
BRADI_3g42130v3	3.93596	0.00588996	19.6999	9.06068e-06	8.98841e-05
BRADI_2g61320v3	-1.20146	5.70331	19.6917	9.09973e-06	9.01983e-05
BRADI_4g06880v3	-2.82467	0.79409	19.6913	9.10164e-06	9.01983e-05
BRADI_3g41460v3	-2.51089	0.815842	19.6874	9.11993e-06	9.03334e-05
BRADI_1g56930v3	-1.98611	6.75888	19.6833	9.13947e-06	9.04808e-05
BRADI_1g02550v3	-2.22828	6.79253	19.6605	9.24942e-06	9.15226e-05
BRADI_4g29500v3	2.66399	1.36392	19.6545	9.27866e-06	9.17651e-05
BRADI_3g33217v3	-2.1678	4.4126	19.6405	9.34686e-06	9.23925e-05
BRADI_5g06390v3	1.34045	3.64194	19.6327	9.38482e-06	9.27205e-05
BRADI_3g59510v3	-0.89469	5.8008	19.6153	9.47071e-06	9.35214e-05
BRADI_2g50480v3	4.16833	1.87469	19.6138	9.47806e-06	9.35464e-05
BRADI_1g21260v3	1.03383	5.84342	19.6005	9.5443e-06	9.41523e-05
BRADI_3g49480v3	1.84936	2.28693	19.5938	9.57805e-06	9.44373e-05
BRADI_2g60990v3	0.927702	6.98106	19.5884	9.60528e-06	9.46576e-05
BRADI_3g03710v3	0.905993	5.83108	19.5872	9.61104e-06	9.46663e-05
BRADI_3g55190v3	-1.51305	6.24014	19.5857	9.61844e-06	9.46911e-05
BRADI_1g38140v3	2.05022	1.04735	19.573	9.68276e-06	9.5276e-05
BRADI_3g35510v3	-1.02894	5.41779	19.5669	9.71377e-06	9.55327e-05
BRADI_1g70761v3	-2.64917	7.73705	19.5612	9.7426e-06	9.57677e-05
BRADI_1g01880v3	-1.5038	7.67323	19.553	9.78451e-06	9.61309e-05
BRADI_2g57386v3	-1.64196	4.74888	19.5515	9.79239e-06	9.61597e-05
BRADI_2g04170v3	-1.61641	4.21898	19.549	9.80531e-06	9.62094e-05
BRADI_3g37940v3	-2.47976	8.67381	19.548	9.81035e-06	9.62094e-05
BRADI_1g13190v3	0.921342	5.31545	19.5476	9.81233e-06	9.62094e-05
BRADI_1g27140v3	-0.996293	5.29763	19.5327	9.8891e-06	9.68421e-05
BRADI_1g53105v3	-1.61161	1.59605	19.5326	9.88997e-06	9.68421e-05
BRADI_3g02806v3	1.08767	4.41991	19.5322	9.89183e-06	9.68421e-05
BRADI_5g13840v3	1.85355	2.23155	19.5122	9.99597e-06	9.78123e-05
BRADI_5g22961v3	-1.45125	2.12622	19.5076	1.00201e-05	9.79986e-05
BRADI_1g42516v3	-3.53681	1.66081	19.5039	1.00394e-05	9.8138e-05
BRADI_5g03190v3	-3.30199	0.534996	19.4952	1.00854e-05	9.85387e-05
BRADI_3g53860v3	1.13847	7.41497	19.4898	1.01137e-05	9.87656e-05
BRADI_2g27420v3	6.58571	-0.286922	19.488	1.01236e-05	9.8812e-05
BRADI_4g06040v3	-1.35012	5.4694	19.4764	1.01852e-05	9.93633e-05
BRADI_1g38227v3	1.69531	4.4667	19.4715	1.02114e-05	9.95259e-05
BRADI_5g16200v3	-1.15783	5.83698	19.4713	1.02121e-05	9.95259e-05
BRADI_5g19820v3	-1.08799	4.14053	19.4676	1.02318e-05	9.96679e-05
BRADI_4g44200v3	2.12269	0.551698	19.4664	1.02384e-05	9.96818e-05
BRADI_1g22290v3	1.13213	3.08338	19.462	1.02622e-05	9.9863e-05
BRADI_1g70930v3	-2.00496	7.559	19.4581	1.02831e-05	0.000100017
BRADI_4g38260v3	-1.2918	8.97447	19.4528	1.03114e-05	0.000100242
BRADI_2g51500v3	-1.67625	7.43465	19.4491	1.03318e-05	0.000100389
BRADI_1g45040v3	-1.10561	4.99286	19.4413	1.03742e-05	0.000100743
BRADI_3g60100v3	3.4815	0.0963861	19.4405	1.03785e-05	0.000100743
[truncated: 17,405 more rows]

## Sheet: Bd.tol
geneID	logFC	logCPM	LR	PValue	FDR
BRADI_1g28410v3	2.58824	3.32975	126.429	2.47662e-29	4.5597e-25
BRADI_2g45143v3	-2.90183	6.0719	123.408	1.13529e-28	1.04509e-24
BRADI_3g43250v3	-2.10949	3.83589	108.788	1.80565e-25	1.10813e-21
BRADI_1g41150v3	-4.97973	1.73612	82.9507	8.4125e-20	3.87206e-16
BRADI_2g57590v3	0.861581	9.58516	62.0234	3.39404e-15	1.24975e-11
BRADI_5g26230v3	2.00275	7.33501	58.7894	1.75482e-14	5.38467e-11
BRADI_2g61050v3	-3.42142	5.48225	56.1338	6.77034e-14	1.7807e-10
BRADI_2g60970v3	-3.58937	5.19589	51.2269	8.2285e-13	1.89369e-09
BRADI_2g34250v3	0.804565	6.87103	50.0687	1.48454e-12	3.03688e-09
BRADI_1g69330v3	2.54805	3.67129	48.6219	3.10387e-12	5.71453e-09
BRADI_2g12216v3	2.30606	2.14511	45.457	1.56026e-11	2.61144e-08
BRADI_4g43860v3	1.72968	2.8709	44.6928	2.30505e-11	3.53652e-08
BRADI_2g16282v3	1.50469	5.527	41.2465	1.34191e-10	1.90046e-07
BRADI_4g29780v3	1.09086	5.37421	40.3606	2.11152e-10	2.7768e-07
BRADI_1g14710v3	0.921792	6.49279	39.7008	2.96001e-10	3.63312e-07
BRADI_2g19010v3	-3.13284	5.13879	38.9955	4.24794e-10	4.88805e-07
BRADI_3g30027v3	0.94806	5.0026	37.5294	9.00466e-10	9.28704e-07
BRADI_2g16271v3	1.24509	6.01979	37.5132	9.07972e-10	9.28704e-07
BRADI_3g41377v3	1.53976	3.1738	36.2949	1.69607e-09	1.64349e-06
BRADI_1g65820v3	1.04147	6.54541	35.5738	2.45563e-09	2.26053e-06
BRADI_1g18650v3	0.96694	7.55413	33.8514	5.94859e-09	5.21522e-06
BRADI_4g30060v3	0.91715	10.6388	32.7715	1.03655e-08	8.67448e-06
BRADI_3g21042v3	-4.71095	-0.220134	32.6557	1.10014e-08	8.70789e-06
BRADI_2g56260v3	0.776391	9.59817	32.5662	1.15201e-08	8.70789e-06
BRADI_2g57732v3	1.0604	3.50318	32.5155	1.18243e-08	8.70789e-06
BRADI_1g74620v3	2.0063	1.66235	31.4654	2.03027e-08	1.42294e-05
BRADI_2g57730v3	0.94116	7.10633	31.4121	2.08676e-08	1.42294e-05
BRADI_3g11060v3	1.7893	4.60894	29.4795	5.65103e-08	3.71575e-05
BRADI_2g48267v3	0.759	6.24319	29.2643	6.31477e-08	3.90028e-05
BRADI_2g48030v3	0.88979	6.21389	29.2519	6.35535e-08	3.90028e-05
BRADI_1g73770v3	0.664999	9.93117	29.0903	6.90821e-08	4.10281e-05
BRADI_4g37203v3	1.53051	2.82673	28.782	8.09986e-08	4.66021e-05
BRADI_1g07530v3	0.87328	9.33818	28.6431	8.70242e-08	4.85516e-05
BRADI_1g05890v3	-1.64082	1.89812	27.824	1.32865e-07	7.19466e-05
BRADI_4g07380v3	1.37156	11.7568	27.7642	1.37042e-07	7.2088e-05
BRADI_2g11567v3	-3.21448	1.31485	26.3001	2.92278e-07	0.000149476
BRADI_3g42180v3	-1.06717	4.92614	26.1536	3.15309e-07	0.000154581
BRADI_1g54030v3	0.799752	8.50692	26.1308	3.19053e-07	0.000154581
BRADI_2g45757v3	0.651767	6.71272	25.8958	3.60349e-07	0.000170112
BRADI_3g14360v3	1.05059	3.47508	25.7547	3.87674e-07	0.000178437
BRADI_2g55450v3	0.94872	8.3485	25.4018	4.6548e-07	0.000209023
BRADI_2g56865v3	-1.8028	7.54462	24.6874	6.74247e-07	0.000295561
BRADI_1g12130v3	1.91254	9.82939	24.5211	7.3502e-07	0.000314708
BRADI_1g20780v3	0.860637	5.39374	23.876	1.02743e-06	0.00042991
BRADI_1g75900v3	3.25586	0.0354806	23.7217	1.11319e-06	0.000455443
BRADI_1g03340v3	1.00392	7.56613	23.6613	1.14872e-06	0.000459762
BRADI_1g07133v3	0.723773	6.27842	23.5422	1.22201e-06	0.00047869
BRADI_4g23850v3	0.672794	7.72516	23.2076	1.45422e-06	0.000557786
BRADI_3g10412v3	1.07194	4.55044	23.1081	1.53144e-06	0.000575414
BRADI_2g48410v3	0.761801	5.70046	22.9322	1.67817e-06	0.000615704
BRADI_3g44640v3	-0.90027	4.76337	22.9011	1.70555e-06	0.000615704
BRADI_2g02720v3	-1.19921	4.0891	22.6636	1.92991e-06	0.000683298
BRADI_1g43950v3	0.550024	10.2231	22.4647	2.14041e-06	0.000736566
BRADI_3g34102v3	0.789809	6.34153	22.4469	2.16037e-06	0.000736566
BRADI_1g06890v3	0.918607	11.0653	22.3918	2.22323e-06	0.000744215
BRADI_1g13420v3	0.971995	4.34667	22.2175	2.43442e-06	0.000800359
BRADI_2g41380v3	-3.24958	-0.273263	21.6295	3.3073e-06	0.00106826
BRADI_4g03820v3	0.615252	6.61485	21.482	3.57172e-06	0.00113377
BRADI_2g30400v3	0.54307	10.0104	21.333	3.86022e-06	0.00120459
BRADI_1g49790v3	-0.644193	6.54759	21.1506	4.24575e-06	0.00130281
BRADI_3g09660v3	0.60843	9.09635	21.0499	4.4747e-06	0.00135055
BRADI_1g17840v3	-0.628246	5.19342	21.016	4.55462e-06	0.0013525
BRADI_2g02930v3	0.614698	6.7967	20.9416	4.73497e-06	0.00138374
BRADI_3g14330v3	0.881131	6.31519	20.7383	5.26526e-06	0.00150204
BRADI_1g47140v3	0.794358	9.05933	20.7246	5.30296e-06	0.00150204
BRADI_3g16400v3	0.736226	7.9926	20.6274	5.57907e-06	0.00154895
BRADI_3g53907v3	0.676363	9.45832	20.6077	5.63683e-06	0.00154895
BRADI_5g16740v3	1.13896	6.26421	20.5086	5.9363e-06	0.00160725
BRADI_1g17480v3	-1.51629	3.16173	20.4027	6.27408e-06	0.00167409
BRADI_3g02200v3	1.5856	4.98744	20.1861	7.02623e-06	0.00183283
BRADI_5g24227v3	0.993189	7.45679	20.1747	7.06811e-06	0.00183283
BRADI_3g40357v3	-0.806585	3.63944	20.0693	7.46879e-06	0.00190983
BRADI_4g33940v3	0.547939	8.60344	19.9568	7.92131e-06	0.0019978
BRADI_3g23350v3	-0.937006	3.29934	19.9248	8.055e-06	0.00200406
BRADI_1g72780v3	0.564741	6.38824	19.7897	8.64488e-06	0.00212214
BRADI_3g34940v3	0.607884	7.93638	19.6848	9.13247e-06	0.00219008
BRADI_2g18997v3	-6.55977	-0.307588	19.6792	9.15952e-06	0.00219008
BRADI_1g65130v3	-1.00601	4.73871	19.6418	9.3402e-06	0.00220282
BRADI_3g54550v3	0.595406	5.8813	19.6191	9.4521e-06	0.00220282
BRADI_2g00697v3	0.651504	8.01874	19.5357	9.8739e-06	0.00224593
BRADI_5g20670v3	0.627829	8.4891	19.5316	9.89504e-06	0.00224593
BRADI_4g14190v3	1.74797	2.88302	19.5108	1.0003e-05	0.00224593
BRADI_1g76470v3	0.508846	11.4639	19.3205	1.10513e-05	0.00245139
BRADI_3g47740v3	0.650165	6.11375	19.1883	1.18438e-05	0.00259591
BRADI_5g03290v3	0.737175	3.87627	19.0862	1.24944e-05	0.00270629
BRADI_5g16550v3	0.687469	5.39271	18.7982	1.45304e-05	0.00308482
BRADI_2g01504v3	0.71551	5.69027	18.7707	1.47414e-05	0.00308482
BRADI_3g02487v3	0.746833	7.89323	18.7703	1.47447e-05	0.00308482
BRADI_1g06772v3	0.595722	6.01907	18.7357	1.50141e-05	0.0031059
BRADI_2g27030v3	0.558843	6.47832	18.6064	1.60681e-05	0.00328699
BRADI_2g47410v3	-0.63133	5.98286	18.5322	1.6706e-05	0.00337993
BRADI_3g34340v3	0.516263	6.00946	18.4865	1.71116e-05	0.00342436
BRADI_1g29880v3	1.6054	1.59554	18.3994	1.79111e-05	0.00352315
BRADI_1g03940v3	0.696594	4.30435	18.3913	1.7988e-05	0.00352315
BRADI_2g38660v3	1.48595	5.77277	18.3414	1.84655e-05	0.00357861
BRADI_2g20380v3	0.505516	7.79356	18.1045	2.09102e-05	0.00401018
BRADI_2g58013v3	0.75179	6.31653	18.0823	2.11565e-05	0.00401558
BRADI_2g03212v3	0.727683	7.83786	18.0271	2.17785e-05	0.00409147
BRADI_5g10737v3	2.35664	3.35931	17.9699	2.24423e-05	0.00417359
BRADI_3g45700v3	0.472153	9.12775	17.8812	2.35133e-05	0.00432903
BRADI_1g06750v3	0.62424	5.95162	17.7039	2.58096e-05	0.00470477
BRADI_4g28670v3	0.697288	5.5789	17.5938	2.73484e-05	0.00493639
BRADI_3g30150v3	0.862962	7.11107	17.5592	2.78493e-05	0.004978
BRADI_3g06530v3	0.696541	7.87759	17.5305	2.82729e-05	0.00500512
BRADI_3g39830v3	0.687031	7.03361	17.5105	2.85724e-05	0.00500997
BRADI_1g59570v3	1.40446	1.81578	17.441	2.9637e-05	0.00514762
BRADI_2g26240v3	0.774559	7.98871	17.4194	2.99757e-05	0.00515779
BRADI_2g57900v3	-2.96988	2.56457	17.2761	3.23221e-05	0.00551001
BRADI_2g17200v3	0.853697	5.40947	17.2336	3.30545e-05	0.00558318
BRADI_2g41560v3	0.840163	6.34172	17.2081	3.34999e-05	0.00560697
BRADI_4g32730v3	0.606417	7.87778	17.18	3.39998e-05	0.00563937
BRADI_4g36310v3	0.517801	9.05348	17.1236	3.50251e-05	0.00575757
BRADI_1g46622v3	0.570218	8.12525	17.0986	3.5489e-05	0.00578219
BRADI_1g42670v3	0.495086	12.4452	17.0621	3.6177e-05	0.00582934
BRADI_2g55150v3	0.518052	10.4477	17.0498	3.64116e-05	0.00582934
BRADI_1g77400v3	0.740208	4.35928	17.023	3.69299e-05	0.00586134
BRADI_1g19080v3	0.57578	11.0925	16.9928	3.75217e-05	0.00590437
BRADI_5g20177v3	0.561219	7.27941	16.7341	4.30013e-05	0.00667453
BRADI_3g30500v3	0.554243	9.64055	16.7279	4.3141e-05	0.00667453
BRADI_5g17230v3	0.961952	4.06459	16.675	4.43619e-05	0.00676185
BRADI_3g53290v3	-0.571858	5.6723	16.6717	4.44399e-05	0.00676185
BRADI_2g25550v3	0.744819	7.89156	16.5953	4.62659e-05	0.00698199
BRADI_5g22510v3	0.673836	5.83996	16.5718	4.68423e-05	0.00701149
BRADI_1g20440v3	0.967901	7.2553	16.5514	4.73478e-05	0.00703001
BRADI_1g56280v3	0.637613	4.96121	16.5287	4.792e-05	0.00705804
BRADI_5g27220v3	0.8714	4.15221	16.4581	4.97366e-05	0.00726746
BRADI_2g53970v3	1.32382	6.14982	16.404	5.1176e-05	0.00741891
BRADI_2g39950v3	0.672746	7.67665	16.3589	5.24104e-05	0.0075385
BRADI_1g77047v3	0.570781	7.90162	16.3431	5.28477e-05	0.00754247
ENSRNA049997969	2.92293	0.717663	16.3133	5.36862e-05	0.0076032
BRADI_1g44530v3	0.487918	7.20666	16.2136	5.65875e-05	0.00795293
BRADI_1g28330v3	0.527019	9.08045	16.0712	6.10041e-05	0.00850869
BRADI_5g14210v3	0.468097	9.47575	15.9602	6.46889e-05	0.00895479
BRADI_3g22840v3	-0.753732	5.38212	15.9051	6.66003e-05	0.00913407
BRADI_1g35386v3	0.655736	3.98708	15.8944	6.69762e-05	0.00913407
BRADI_5g24550v3	0.488079	11.351	15.8566	6.8329e-05	0.00922647
BRADI_1g66640v3	0.898493	3.68068	15.8448	6.87567e-05	0.00922647
BRADI_3g58020v3	0.572987	6.58666	15.8261	6.94368e-05	0.00922647
BRADI_3g14710v3	-0.601336	7.35374	15.8201	6.96583e-05	0.00922647
BRADI_1g02550v3	0.484165	7.58375	15.6707	7.53829e-05	0.00989318
BRADI_3g10600v3	-1.11926	3.29558	15.6611	7.57666e-05	0.00989318
BRADI_4g09019v3	3.58842	-0.639723	15.594	7.85022e-05	0.0101165
BRADI_5g16557v3	0.748709	3.69998	15.5923	7.8576e-05	0.0101165
BRADI_4g37210v3	0.535874	13.5217	15.5604	7.99108e-05	0.0102169
BRADI_1g42820v3	0.900239	7.01343	15.4053	8.67445e-05	0.0109128
BRADI_3g49150v3	0.552649	6.27332	15.3989	8.70372e-05	0.0109128
BRADI_3g32820v3	0.72389	4.0095	15.3855	8.76573e-05	0.0109128
BRADI_4g08030v3	0.465685	10.8152	15.3794	8.79431e-05	0.0109128
BRADI_3g59430v3	0.625581	9.42907	15.3713	8.83175e-05	0.0109128
BRADI_1g63300v3	0.525745	7.8137	15.2277	9.52975e-05	0.0116622
BRADI_3g40007v3	-1.74908	2.15699	15.2207	9.56489e-05	0.0116622
BRADI_3g22820v3	-0.843935	5.34943	15.1838	9.75361e-05	0.0118141
BRADI_5g03110v3	-0.821896	3.09959	15.0021	0.000107391	0.0128618
BRADI_4g05930v3	0.597719	6.3604	14.9987	0.000107584	0.0128618
BRADI_1g07340v3	0.551507	5.52785	14.9569	0.000109995	0.0130653
BRADI_2g01890v3	0.512678	4.82809	14.932	0.000111456	0.0131539
BRADI_2g18210v3	0.594611	6.26645	14.9196	0.000112189	0.0131561
BRADI_4g27210v3	0.69085	6.12029	14.864	0.000115547	0.0134641
BRADI_4g11300v3	0.650072	5.57238	14.8347	0.000117359	0.0135893
BRADI_1g56130v3	0.475921	9.3087	14.8149	0.000118593	0.0136463
BRADI_1g24320v3	0.587295	4.56019	14.7833	0.000120599	0.013791
BRADI_4g27040v3	0.456979	8.06989	14.6624	0.000128586	0.0146136
BRADI_3g02130v3	1.929	3.12624	14.6063	0.000132471	0.0148486
BRADI_4g32265v3	2.39967	1.00684	14.5963	0.000133176	0.0148486
BRADI_4g00430v3	-0.829191	4.76553	14.5868	0.000133845	0.0148486
BRADI_4g14975v3	1.17948	1.25067	14.5864	0.000133881	0.0148486
BRADI_2g49460v3	0.624854	6.21278	14.532	0.0001378	0.0150779
BRADI_2g48367v3	0.452775	6.9866	14.5243	0.00013836	0.0150779
BRADI_2g43056v3	-2.1114	2.73919	14.5237	0.000138404	0.0150779
BRADI_1g49770v3	0.495175	8.28156	14.5008	0.000140103	0.0151731
BRADI_2g43710v3	0.677563	5.38222	14.451	0.000143856	0.0154884
BRADI_1g18660v3	0.563902	6.48746	14.4154	0.000146599	0.015692
BRADI_2g47860v3	-0.597464	5.07827	14.3601	0.000150968	0.0160663
BRADI_1g26070v3	0.621269	6.49382	14.28	0.000157531	0.0165406
BRADI_3g60920v3	0.516937	7.52592	14.2736	0.000158068	0.0165406
BRADI_2g61320v3	0.622455	5.82458	14.2718	0.00015822	0.0165406
BRADI_3g10597v3	-1.08851	1.59861	14.2559	0.000159559	0.0165406
BRADI_2g62280v3	0.728677	5.35498	14.2517	0.000159917	0.0165406
BRADI_1g66830v3	0.450812	6.27718	14.2309	0.00016169	0.0165442
BRADI_1g67990v3	0.542832	8.29732	14.2266	0.000162065	0.0165442
BRADI_1g76787v3	0.695717	5.69202	14.2198	0.000162647	0.0165442
BRADI_3g16187v3	0.633172	8.76381	14.1634	0.000167601	0.0169544
BRADI_3g39920v3	0.815213	2.75789	14.0902	0.000174252	0.0174669
BRADI_1g34340v3	-0.509001	5.29561	14.077	0.000175474	0.0174669
BRADI_1g04300v3	0.513992	7.52391	14.0766	0.000175514	0.0174669
BRADI_1g07010v3	0.574797	5.27799	14.0609	0.000176987	0.0175189
BRADI_3g10365v3	-1.02645	2.97409	14.0412	0.000178845	0.0176081
BRADI_4g16800v3	0.808929	5.41797	14.0281	0.000180099	0.0176372
BRADI_1g00700v3	-0.676459	6.14353	13.9884	0.000183943	0.0179184
BRADI_2g59950v3	0.8799	3.35235	13.9726	0.000185497	0.0179746
BRADI_2g26650v3	0.580138	6.96265	13.9586	0.000186876	0.0180135
BRADI_1g34560v3	0.504056	7.92955	13.9036	0.000192429	0.0184522
BRADI_2g47191v3	0.662341	4.09732	13.893	0.000193522	0.0184608
BRADI_4g16060v3	-1.17364	1.7552	13.8246	0.000200688	0.0190457
BRADI_2g23060v3	0.808465	4.81666	13.8067	0.000202611	0.0191296
BRADI_1g23722v3	-0.792964	3.15446	13.7693	0.000206688	0.019415
BRADI_3g09730v3	0.630256	7.48901	13.7394	0.000210002	0.0196261
BRADI_4g42530v3	-0.691422	3.7896	13.7224	0.000211908	0.0197042
BRADI_4g26750v3	-0.535805	7.27211	13.6607	0.000218991	0.0202606
BRADI_1g52460v3	0.425537	12.2839	13.6471	0.000220585	0.020306
BRADI_1g54037v3	0.602593	4.46003	13.6245	0.000223249	0.0203994
BRADI_2g56360v3	-1.00587	3.68428	13.6198	0.000223817	0.0203994
BRADI_1g66090v3	0.51657	6.67031	13.5739	0.000229356	0.0207414
BRADI_2g30560v3	0.547719	7.65732	13.5701	0.000229821	0.0207414
BRADI_2g49930v3	1.25733	1.62187	13.5467	0.000232699	0.0208158
BRADI_2g25410v3	0.693082	3.74489	13.545	0.000232907	0.0208158
BRADI_5g01135v3	0.830645	4.31414	13.4467	0.00024544	0.0218299
BRADI_3g32690v3	0.518809	6.6179	13.4025	0.000251295	0.0222074
BRADI_3g10330v3	0.79168	6.05789	13.3959	0.000252179	0.0222074
BRADI_2g42040v3	0.419009	8.28029	13.3875	0.000253302	0.0222074
BRADI_3g58780v3	0.719749	6.94937	13.3441	0.000259241	0.0226203
BRADI_3g00227v3	0.49137	8.12646	13.3249	0.0002619	0.0227383
BRADI_1g67170v3	0.724354	7.36764	13.3141	0.000263422	0.0227383
BRADI_5g12370v3	0.457408	5.80449	13.3078	0.000264299	0.0227383
BRADI_2g46690v3	0.427969	8.04693	13.2774	0.000268625	0.023003
BRADI_5g11060v3	0.600922	3.95346	13.1868	0.000281927	0.0240303
BRADI_2g19450v3	0.834341	3.38392	13.1365	0.000289606	0.0245711
BRADI_1g08421v3	-0.550915	5.38476	13.1165	0.00029271	0.0246965
BRADI_2g42300v3	0.45128	6.73412	13.1097	0.000293766	0.0246965
BRADI_5g12150v3	0.512187	11.8503	13.0601	0.000301654	0.0252443
BRADI_4g16480v3	0.579888	5.56243	12.9791	0.000314986	0.0262408
BRADI_3g41800v3	0.595004	6.16413	12.9504	0.000319849	0.0264088
BRADI_1g37626v3	-0.865679	2.42572	12.9503	0.000319872	0.0264088
BRADI_2g39710v3	0.558869	8.11375	12.8954	0.000329393	0.0269867
BRADI_3g27730v3	0.947197	5.03444	12.8931	0.000329803	0.0269867
BRADI_2g39830v3	-0.798203	3.19606	12.8685	0.000334159	0.0272055
BRADI_4g34500v3	0.504518	5.073	12.8614	0.000335433	0.0272055
BRADI_4g27450v3	0.626429	9.78297	12.809	0.00034495	0.0278547
BRADI_4g07930v3	-1.52118	1.3936	12.784	0.000349604	0.0281073
BRADI_3g01470v3	0.697924	8.15157	12.77	0.000352222	0.0281773
BRADI_2g52730v3	0.510035	6.76828	12.763	0.000353537	0.0281773
BRADI_3g15050v3	0.841127	8.20639	12.7161	0.000362515	0.0287296
BRADI_1g19790v3	0.483601	4.82914	12.7106	0.000363587	0.0287296
BRADI_3g57430v3	0.464157	6.98817	12.702	0.000365265	0.0287389
BRADI_1g58997v3	0.580839	5.64856	12.6536	0.000374845	0.0293671
BRADI_1g19220v3	0.584373	11.8927	12.6174	0.000382183	0.0298151
BRADI_2g59210v3	0.532189	7.69165	12.6004	0.000385671	0.0299603
BRADI_3g13170v3	0.807662	11.2758	12.5906	0.000387698	0.0299912
BRADI_2g02770v3	0.50164	6.47579	12.5814	0.000389612	0.0300132
BRADI_5g21310v3	0.482712	7.43182	12.5492	0.000396378	0.0304071
BRADI_2g40040v3	0.559168	7.25116	12.5265	0.000401214	0.0306504
BRADI_5g09650v3	0.551455	8.97741	12.4997	0.000407008	0.0309646
BRADI_1g64130v3	0.614513	8.64362	12.4733	0.000412801	0.0312338
BRADI_4g31727v3	-0.474588	4.93855	12.4682	0.000413939	0.0312338
BRADI_3g37080v3	0.509936	4.85534	12.4535	0.000417199	0.0313384
BRADI_1g24980v3	0.400876	10.8569	12.4467	0.00041873	0.0313384
BRADI_4g30570v3	0.540496	6.37294	12.4351	0.000421333	0.0314055
BRADI_1g60030v3	0.641492	5.97969	12.3248	0.000446971	0.0328957
BRADI_1g76290v3	0.562176	5.54089	12.3233	0.000447335	0.0328957
BRADI_2g59690v3	-0.75475	3.53817	12.3126	0.000449909	0.0328957
BRADI_4g13830v3	0.703981	5.29657	12.3096	0.000450628	0.0328957
BRADI_4g31660v3	-2.42931	0.20225	12.3068	0.000451312	0.0328957
BRADI_3g02570v3	0.644823	6.55946	12.3038	0.000452046	0.0328957
BRADI_3g07190v3	0.506252	12.2567	12.252	0.00046477	0.0336885
BRADI_2g21120v3	0.514261	11.2053	12.1458	0.000491975	0.0355206
BRADI_5g13590v3	-0.586862	3.73637	12.1177	0.00049945	0.0359194
BRADI_1g04130v3	0.622375	7.70723	12.0942	0.000505799	0.0362345
BRADI_3g36120v3	0.484194	5.87449	12.0588	0.000515476	0.0367846
BRADI_1g52330v3	0.81794	5.18884	12.0433	0.000519793	0.0369494
BRADI_2g53170v3	0.874156	3.13733	12.0325	0.0005228	0.0370203
BRADI_2g10740v3	0.737718	7.02846	11.9751	0.000539176	0.0380336
BRADI_2g13470v3	-0.711239	2.99793	11.9597	0.000543627	0.0382012
BRADI_2g36130v3	0.655725	5.87924	11.9495	0.000546628	0.038266
BRADI_3g37980v3	-0.984963	4.67522	11.942	0.000548815	0.0382736
BRADI_1g24500v3	0.638977	6.14199	11.8868	0.000565318	0.0391754
BRADI_2g57386v3	0.711527	5.1595	11.8846	0.000566002	0.0391754
BRADI_3g50390v3	0.596637	7.34278	11.8579	0.000574167	0.0395917
BRADI_1g30020v3	1.36959	0.585395	11.8465	0.000577707	0.0396871
BRADI_1g53290v3	-1.0674	1.41893	11.8305	0.000582669	0.0398792
BRADI_3g20520v3	0.404662	8.49702	11.7873	0.000596377	0.0406663
BRADI_2g18650v3	0.60368	3.72344	11.7095	0.000621821	0.0422448
BRADI_3g23066v3	-0.554539	4.66131	11.7014	0.000624535	0.0422732
BRADI_1g02030v3	0.55295	7.7579	11.6827	0.000630837	0.0425434
BRADI_3g34375v3	0.47919	5.12444	11.6495	0.000642198	0.042864
BRADI_2g25910v3	0.413309	8.51359	11.6486	0.000642518	0.042864
BRADI_3g54341v3	-0.523141	5.20373	11.6484	0.000642576	0.042864
BRADI_4g39240v3	-1.1331	2.62998	11.5732	0.000669088	0.0444714
BRADI_4g09982v3	-0.718455	2.74767	11.5618	0.000673214	0.0445847
BRADI_2g07266v3	0.676394	5.66166	11.5537	0.000676143	0.0446182
BRADI_3g47067v3	0.877378	4.72138	11.5215	0.000687975	0.0452368
BRADI_3g05950v3	0.506095	8.06192	11.4787	0.000703971	0.0461239
BRADI_1g71420v3	0.483818	6.43833	11.4133	0.000729191	0.047528
BRADI_1g21580v3	-0.777198	3.25628	11.4098	0.000730564	0.047528
BRADI_2g00950v3	0.53627	4.92183	11.3888	0.000738868	0.0478989
BRADI_1g24870v3	0.433083	12.5663	11.3716	0.000745773	0.0479256
BRADI_2g07310v3	-0.779466	2.99748	11.3714	0.000745824	0.0479256
BRADI_2g12204v3	1.3686	1.06989	11.3683	0.000747089	0.0479256
BRADI_3g26680v3	0.732854	3.07423	11.3611	0.000749965	0.0479431
BRADI_1g10110v3	-0.415449	7.69322	11.3491	0.000754859	0.048089
BRADI_3g10820v3	-0.420207	7.34929	11.3217	0.000766051	0.0484236
BRADI_4g09417v3	0.812757	5.57303	11.3186	0.000767357	0.0484236
BRADI_3g26920v3	0.744018	3.444	11.317	0.000768003	0.0484236
BRADI_1g29500v3	0.515961	8.01994	11.27	0.000787693	0.0494738
BRADI_2g44760v3	0.984863	4.75374	11.2622	0.000791028	0.0494738
BRADI_1g66790v3	0.81152	4.76066	11.2582	0.00079272	0.0494738
BRADI_2g03350v3	0.45021	8.26004	11.2272	0.000806078	0.0501375
BRADI_3g46737v3	0.485419	9.5305	11.1839	0.000825086	0.051147
BRADI_4g18170v3	1.10328	4.85447	11.1626	0.000834607	0.0515131
BRADI_1g08106v3	-0.755989	3.41313	11.1555	0.000837809	0.0515131
BRADI_2g46450v3	0.485149	4.78438	11.1521	0.000839386	0.0515131
BRADI_5g13713v3	0.660336	3.14389	11.1094	0.000858905	0.0525215
BRADI_1g07370v3	0.655783	6.76226	11.1038	0.000861522	0.0525215
BRADI_4g16885v3	0.649666	5.10881	11.0668	0.000878856	0.0534014
BRADI_2g19540v3	-1.88676	0.722594	11.0427	0.000890357	0.0534957
BRADI_1g62410v3	0.466821	6.53137	11.0393	0.000892004	0.0534957
BRADI_4g33323v3	0.50733	10.6109	11.038	0.000892616	0.0534957
BRADI_5g19240v3	-0.72221	2.97185	11.038	0.000892628	0.0534957
BRADI_4g28160v3	0.390294	8.77803	11.0281	0.000897429	0.0534957
BRADI_1g27280v3	0.371333	7.19997	11.0209	0.000900912	0.0534957
BRADI_3g32100v3	0.405598	8.9504	11.0154	0.000903604	0.0534957
BRADI_1g65900v3	0.710969	6.80835	11.0153	0.000903653	0.0534957
BRADI_1g61860v3	0.695226	4.66886	10.9367	0.000942771	0.0556325
BRADI_3g40250v3	-2.41331	-0.54898	10.8771	0.000973615	0.0572691
BRADI_2g46520v3	0.640897	7.60761	10.8707	0.000976984	0.0572731
BRADI_1g15170v3	0.425298	7.18022	10.8652	0.000979904	0.0572731
BRADI_5g17126v3	0.715156	7.48737	10.8418	0.000992338	0.0578162
BRADI_4g40440v3	0.613664	3.56226	10.8021	0.00101388	0.0588847
BRADI_3g56060v3	0.714257	7.14693	10.7689	0.00103222	0.0597616
BRADI_1g74570v3	0.390194	7.25872	10.7493	0.00104317	0.0602063
BRADI_2g58770v3	0.550375	7.31563	10.7312	0.00105344	0.0606092
BRADI_4g08800v3	0.423992	13.5884	10.7033	0.00106946	0.0610355
BRADI_4g13684v3	-0.623364	3.84651	10.7015	0.00107047	0.0610355
BRADI_3g37680v3	0.807079	8.84779	10.701	0.0010708	0.0610355
BRADI_2g12310v3	0.399367	8.71864	10.6902	0.00107707	0.061147
BRADI_1g55740v3	0.411566	9.17674	10.6862	0.0010794	0.061147
BRADI_2g05130v3	0.612015	5.52077	10.676	0.00108537	0.0612886
BRADI_1g30860v3	-2.11241	-0.163608	10.6657	0.00109138	0.0612886
BRADI_1g77950v3	0.46948	6.61414	10.6627	0.00109316	0.0612886
BRADI_5g24590v3	0.472992	6.35192	10.6554	0.00109751	0.0612886
BRADI_2g31560v3	0.440628	7.13349	10.6536	0.00109854	0.0612886
BRADI_1g03400v3	0.56345	4.23975	10.647	0.00110249	0.0613233
BRADI_4g42517v3	0.436985	5.8918	10.6279	0.00111397	0.0617747
BRADI_5g27602v3	0.409031	6.53897	10.6024	0.00112939	0.0624419
BRADI_3g55890v3	0.432729	7.31462	10.5849	0.00114014	0.0628476
BRADI_1g24900v3	0.447669	5.5024	10.5569	0.00115753	0.0636159
BRADI_3g06750v3	0.717721	6.04408	10.5487	0.00116271	0.0637101
BRADI_2g62341v3	-1.01898	2.27911	10.4964	0.00119609	0.0653451
BRADI_1g78660v3	0.497087	7.7649	10.4808	0.00120625	0.0655292
BRADI_4g18770v3	0.624679	6.43981	10.4802	0.00120658	0.0655292
BRADI_2g18300v3	-0.446444	4.86019	10.4744	0.00121038	0.0655419
BRADI_2g56347v3	-1.7896	5.77427	10.4621	0.00121849	0.0657878
BRADI_3g03270v3	0.657584	7.14907	10.4467	0.00122871	0.0661453
BRADI_1g71370v3	-0.446529	7.65051	10.439	0.00123384	0.0662278
BRADI_1g57190v3	0.474087	5.82117	10.371	0.00128012	0.0684355
BRADI_2g06080v3	0.55903	8.2842	10.3677	0.0012824	0.0684355
BRADI_5g23190v3	0.631443	4.52826	10.3312	0.00130802	0.0690901
BRADI_2g20517v3	0.509985	6.88898	10.3305	0.00130853	0.0690901
BRADI_5g23600v3	-0.714385	4.18142	10.3259	0.00131176	0.0690901
BRADI_3g43070v3	0.37403	8.7271	10.3251	0.00131236	0.0690901
BRADI_1g11160v3	0.375194	7.02653	10.3236	0.00131343	0.0690901
BRADI_1g18570v3	0.518927	6.04624	10.2774	0.00134668	0.0706372
BRADI_1g77060v3	0.870089	6.55284	10.2678	0.00135374	0.0706554
BRADI_3g15283v3	0.688184	3.35304	10.2665	0.0013547	0.0706554
BRADI_1g43787v3	1.12682	1.15738	10.2481	0.00136823	0.0711555
BRADI_4g39269v3	0.647971	4.37037	10.243	0.00137202	0.0711555
BRADI_3g01630v3	0.464961	5.53411	10.2359	0.00137732	0.0712298
BRADI_3g27486v3	0.678863	2.94831	10.2293	0.00138225	0.0712844
BRADI_4g19540v3	0.787468	5.68327	10.2171	0.00139143	0.0715575
BRADI_1g52120v3	1.20917	2.14663	10.1875	0.00141395	0.0722897
BRADI_1g17040v3	1.26856	2.38178	10.1856	0.00141542	0.0722897
BRADI_3g59130v3	0.394671	9.87821	10.183	0.00141745	0.0722897
BRADI_1g69650v3	0.713053	7.31452	10.1631	0.0014328	0.0728708
BRADI_3g52102v3	-0.462334	4.74554	10.1559	0.00143838	0.07288
BRADI_3g27975v3	-1.6634	-0.0600431	10.1527	0.0014409	0.07288
BRADI_1g19140v3	0.437158	7.52192	10.1023	0.00148083	0.0746945
BRADI_2g07000v3	0.780107	3.85559	10.0966	0.00148546	0.0747235
BRADI_1g72660v3	-0.398058	5.84891	10.0659	0.00151036	0.0756766
BRADI_1g36050v3	-0.444027	5.55655	10.0632	0.00151263	0.0756766
BRADI_3g38777v3	0.522081	7.37498	10.0373	0.00153402	0.076421
BRADI_1g33860v3	-0.626642	3.92692	10.0341	0.00153668	0.076421
BRADI_4g04640v3	0.463971	4.76221	10.0267	0.00154284	0.076421
BRADI_1g28416v3	0.503932	6.35233	10.0252	0.00154411	0.076421
BRADI_4g11636v3	0.465467	4.46173	10.0155	0.00155226	0.0766183
BRADI_3g50670v3	0.527188	5.26318	9.9995	0.00156583	0.0770813
BRADI_1g46480v3	-0.444306	6.10964	9.97603	0.00158592	0.0777336
BRADI_1g10990v3	0.498473	7.70927	9.97416	0.00158752	0.0777336
BRADI_3g54460v3	-0.485279	4.87124	9.95189	0.00160685	0.0784712
BRADI_1g55080v3	-0.556167	3.45232	9.90822	0.00164542	0.0801424
BRADI_2g45700v3	0.760472	4.60349	9.88587	0.00166553	0.0807777
BRADI_4g05300v3	0.574895	5.29925	9.88398	0.00166724	0.0807777
BRADI_4g20500v3	0.412803	9.28823	9.8676	0.00168215	0.081116
BRADI_2g42820v3	-0.99591	1.31234	9.8666	0.00168306	0.081116
BRADI_2g61800v3	0.42623	5.27588	9.86182	0.00168744	0.081116
BRADI_5g13560v3	0.849966	2.26517	9.85411	0.00169453	0.0812446
BRADI_2g45730v3	0.467756	9.05156	9.84011	0.00170747	0.0816525
BRADI_3g06010v3	0.484915	6.76963	9.81543	0.00173054	0.0823408
BRADI_4g19947v3	-0.76256	3.17324	9.81514	0.00173081	0.0823408
BRADI_1g52011v3	-0.417965	6.33404	9.79679	0.00174817	0.0829524
BRADI_1g37450v3	0.859482	4.58651	9.78697	0.00175752	0.0831819
BRADI_3g12980v3	0.402911	5.38474	9.77986	0.00176434	0.0832905
BRADI_2g49850v3	0.752921	7.04147	9.77216	0.00177174	0.0833706
BRADI_3g00690v3	0.418508	5.68806	9.76868	0.00177509	0.0833706
BRADI_2g42220v3	0.433498	4.5764	9.74758	0.00179559	0.0841187
BRADI_1g06080v3	0.458138	6.78778	9.72897	0.00181386	0.0845487
BRADI_1g30811v3	0.607384	7.20467	9.72887	0.00181396	0.0845487
BRADI_2g46990v3	-0.587889	3.5118	9.69666	0.00184603	0.0858264
BRADI_3g26391v3	0.547602	13.812	9.68412	0.00185867	0.0858847
BRADI_3g14590v3	0.398633	5.94299	9.68358	0.00185922	0.0858847
BRADI_4g05860v3	0.860628	6.54565	9.68155	0.00186128	0.0858847
BRADI_3g05233v3	0.427603	6.28838	9.65719	0.00188612	0.0867191
BRADI_4g14630v3	0.382276	6.74879	9.65326	0.00189015	0.0867191
BRADI_3g10937v3	0.492543	5.48813	9.65002	0.00189349	0.0867191
BRADI_5g23430v3	-0.806424	4.48914	9.63642	0.00190757	0.0871469
BRADI_3g31940v3	2.27829	0.228157	9.62704	0.00191733	0.0873762
BRADI_4g04220v3	-0.410658	8.88175	9.60952	0.00193572	0.0879962
BRADI_2g31660v3	0.443866	6.45526	9.60455	0.00194096	0.0880172
BRADI_3g59950v3	0.461631	4.41153	9.59138	0.00195493	0.0883301
BRADI_3g37270v3	0.470237	4.34853	9.58901	0.00195745	0.0883301
BRADI_2g01310v3	-0.611269	3.65331	9.57572	0.00197167	0.0887542
BRADI_2g24080v3	-1.15441	1.18175	9.56623	0.00198189	0.0888144
BRADI_2g11658v3	-3.30239	-0.619469	9.56537	0.00198283	0.0888144
BRADI_1g62170v3	0.571888	8.20694	9.55533	0.0019937	0.0888144
BRADI_3g58860v3	0.961941	1.67993	9.5536	0.00199557	0.0888144
BRADI_3g53530v3	0.419172	7.23493	9.5476	0.00200211	0.0888144
BRADI_3g16192v3	1.25366	1.24377	9.54751	0.00200221	0.0888144
BRADI_4g08500v3	0.373356	14.1629	9.54333	0.00200678	0.0888144
BRADI_1g20790v3	0.668978	3.50442	9.53373	0.00201729	0.0890657
BRADI_1g60510v3	-0.454506	4.58216	9.51323	0.00203996	0.0898508
BRADI_3g60880v3	3.18571	0.787778	9.50876	0.00204493	0.0898548
BRADI_5g17360v3	0.654553	5.65932	9.48429	0.00207239	0.0904901
BRADI_1g32360v3	-1.16927	1.15381	9.48329	0.00207352	0.0904901
BRADI_4g41590v3	0.419997	6.67887	9.48275	0.00207413	0.0904901
BRADI_3g47370v3	0.689224	4.30431	9.47709	0.00208054	0.0905551
BRADI_4g09257v3	-0.423598	10.1156	9.46984	0.00208878	0.0906993
BRADI_3g21310v3	0.519601	5.1547	9.44738	0.00211451	0.0915266
BRADI_5g22950v3	-0.854081	4.81395	9.44455	0.00211777	0.0915266
BRADI_1g19170v3	0.764099	2.77122	9.41873	0.0021478	0.0926071
BRADI_5g23667v3	0.453768	5.97418	9.41362	0.00215379	0.0926483
BRADI_2g24210v3	0.375603	6.74151	9.40799	0.00216042	0.092717
BRADI_1g61250v3	1.17526	5.93678	9.39023	0.00218144	0.0932029
BRADI_2g59650v3	0.379519	6.79244	9.38987	0.00218187	0.0932029
BRADI_1g13200v3	0.534156	4.79707	9.35647	0.002222	0.0946974
BRADI_3g39040v3	0.501076	5.46038	9.3484	0.0022318	0.0947254
BRADI_1g71350v3	-0.868044	3.8081	9.34746	0.00223295	0.0947254
BRADI_1g34525v3	0.427452	8.59736	9.33961	0.00224253	0.0949133
BRADI_2g60331v3	-1.61962	2.36181	9.3208	0.00226567	0.0956726
BRADI_3g02730v3	0.446616	7.45372	9.28697	0.00230789	0.0971673
BRADI_4g24350v3	0.678126	5.36872	9.28402	0.00231162	0.0971673
BRADI_1g24110v3	0.416906	7.56391	9.26497	0.00233578	0.0978373
BRADI_4g21277v3	0.399375	6.99957	9.26308	0.00233819	0.0978373
BRADI_1g60840v3	0.765419	2.44294	9.25539	0.00234803	0.0980262
BRADI_1g75250v3	0.447645	5.01769	9.2457	0.00236049	0.0983235
BRADI_2g16402v3	0.975226	5.29577	9.23443	0.00237506	0.0986386
BRADI_1g63087v3	0.559303	6.52481	9.22862	0.00238261	0.0986386
BRADI_5g12330v3	0.40722	12.3627	9.22745	0.00238413	0.0986386
BRADI_2g40790v3	0.394569	7.11863	9.21966	0.0023943	0.0988372
BRADI_3g05570v3	0.574338	4.00181	9.20614	0.00241205	0.0991144
BRADI_2g02890v3	0.894725	4.08831	9.20359	0.00241541	0.0991144
BRADI_2g37150v3	-0.506098	4.17157	9.20226	0.00241716	0.0991144
BRADI_5g26287v3	-0.522699	3.84249	9.18587	0.0024389	0.0997836
BRADI_1g66296v3	0.388795	7.67875	9.17662	0.00245127	0.0998552
BRADI_5g02890v3	0.732015	8.47844	9.17537	0.00245293	0.0998552
BRADI_2g03886v3	-0.613395	3.87955	9.17002	0.00246011	0.0998552
BRADI_2g01900v3	0.569963	3.60144	9.16836	0.00246235	0.0998552
BRADI_2g23490v3	0.473431	5.7594	9.154	0.00248175	0.10038
BRADI_1g59990v3	0.425417	5.74295	9.15073	0.00248619	0.10038
BRADI_2g16120v3	1.26624	2.60723	9.1437	0.00249576	0.100546
BRADI_4g31150v3	-0.444242	7.96577	9.11581	0.00253409	0.101867
BRADI_2g49110v3	-0.496522	4.95815	9.10706	0.00254625	0.102133
BRADI_2g11060v3	1.0219	4.84138	9.08927	0.00257114	0.102819
BRADI_1g68540v3	0.47082	5.39222	9.08687	0.00257451	0.102819
BRADI_1g58600v3	0.581955	6.90976	9.0749	0.00259142	0.102929
BRADI_1g37330v3	-0.470516	4.2013	9.07169	0.00259597	0.102929
BRADI_3g22850v3	-0.680364	4.90371	9.06998	0.00259841	0.102929
BRADI_1g66450v3	-1.4883	0.651452	9.06823	0.00260088	0.102929
BRADI_3g48540v3	0.566609	4.92538	9.06281	0.0026086	0.102929
BRADI_1g53936v3	-0.95566	2.19079	9.06126	0.00261082	0.102929
BRADI_2g31480v3	-0.815376	2.91489	9.05361	0.00262177	0.10314
BRADI_3g12800v3	0.373342	8.23448	9.04316	0.0026368	0.10351
BRADI_1g03220v3	0.759263	7.759	9.03354	0.00265071	0.103523
BRADI_3g25370v3	0.454993	5.21432	9.03037	0.0026553	0.103523
BRADI_1g50270v3	0.561283	9.50274	9.02889	0.00265746	0.103523
BRADI_3g54060v3	-1.02572	1.66002	9.0274	0.00265963	0.103523
BRADI_4g06300v3	0.604629	7.03357	9.01853	0.00267257	0.103646
BRADI_3g29210v3	0.722193	3.40733	9.01751	0.00267405	0.103646
BRADI_1g08550v3	0.425921	7.10253	8.98799	0.0027176	0.105113
BRADI_2g58860v3	-0.454373	7.3563	8.97988	0.00272968	0.105297
BRADI_2g60441v3	-0.565309	5.07009	8.97373	0.00273889	0.105297
BRADI_3g47900v3	-1.0388	1.59307	8.97331	0.00273952	0.105297
BRADI_2g54850v3	0.725932	4.69113	8.95944	0.0027604	0.105879
BRADI_3g46470v3	0.485192	4.12655	8.94954	0.0027754	0.105967
BRADI_1g53100v3	0.423964	6.20507	8.94744	0.00277859	0.105967
BRADI_3g30127v3	0.507859	5.84212	8.94622	0.00278044	0.105967
BRADI_2g34480v3	-0.516033	3.5552	8.94025	0.00278955	0.105967
BRADI_1g32160v3	-0.555698	3.87588	8.93898	0.00279148	0.105967
BRADI_3g21140v3	-0.5878	4.29318	8.92589	0.00281156	0.106367
BRADI_1g16580v3	0.400378	8.94674	8.92356	0.00281515	0.106367
BRADI_4g16010v3	0.46404	4.82657	8.91937	0.00282162	0.106367
BRADI_3g46070v3	-0.727063	5.28889	8.91709	0.00282514	0.106367
BRADI_3g46930v3	-0.514482	3.838	8.90876	0.00283805	0.106635
BRADI_4g05100v3	-0.617854	3.03854	8.90311	0.00284685	0.106748
BRADI_3g33030v3	-0.821047	1.71376	8.8917	0.00286471	0.106924
BRADI_3g11520v3	0.834037	3.81578	8.88863	0.00286952	0.106924
BRADI_2g02176v3	-0.840809	1.8095	8.88577	0.00287401	0.106924
BRADI_1g24760v3	0.382201	13.0084	8.88254	0.0028791	0.106924
BRADI_3g22090v3	-1.46595	0.360194	8.8816	0.00288059	0.106924
BRADI_1g74560v3	-0.38016	8.2669	8.869	0.00290054	0.107448
BRADI_5g17480v3	-0.937118	6.12075	8.84186	0.00294399	0.10878
BRADI_3g55400v3	0.634176	3.55217	8.83918	0.00294831	0.10878
BRADI_2g06450v3	0.58536	4.76696	8.80998	0.00299587	0.110138
BRADI_4g36496v3	-1.20471	1.85	8.80924	0.00299709	0.110138
BRADI_2g39820v3	-0.63209	5.52088	8.80118	0.00301035	0.110334
BRADI_5g10985v3	1.73704	-0.11848	8.79873	0.0030144	0.110334
BRADI_2g25745v3	0.466533	8.65984	8.79395	0.00302232	0.110405
BRADI_2g12580v3	-0.759031	1.87479	8.78711	0.00303367	0.1106
BRADI_3g13670v3	1.19759	8.36733	8.78225	0.00304176	0.110676
BRADI_4g34206v3	-1.2693	0.378739	8.76997	0.00306231	0.111204
BRADI_4g36093v3	-0.545883	4.18922	8.75751	0.00308329	0.111745
BRADI_2g12880v3	0.842536	4.30768	8.74936	0.0030971	0.111856
BRADI_4g15060v3	-0.504336	4.35229	8.74853	0.00309852	0.111856
BRADI_2g19260v3	0.453249	5.73302	8.73484	0.00312187	0.112479
BRADI_4g10332v3	0.822217	2.38422	8.72969	0.00313069	0.112576
BRADI_3g14150v3	-0.635011	4.21073	8.71666	0.00315316	0.113163
BRADI_4g23127v3	1.40142	0.184122	8.71115	0.00316269	0.113285
BRADI_3g36930v3	0.397381	9.41777	8.67937	0.00321833	0.115054
BRADI_1g15010v3	0.45454	4.25239	8.66294	0.00324747	0.11587
BRADI_1g53437v3	0.483223	5.17593	8.65675	0.00325852	0.11604
BRADI_1g65400v3	-0.92011	1.23457	8.65267	0.00326583	0.116076
BRADI_2g42380v3	-1.41812	3.22926	8.649	0.00327241	0.116086
BRADI_2g55050v3	0.361917	7.41047	8.64073	0.0032873	0.116239
BRADI_3g53970v3	0.382683	7.66066	8.63681	0.00329438	0.116239
BRADI_4g16830v3	0.443292	7.52568	8.63609	0.00329568	0.116239
BRADI_3g21852v3	0.438576	5.02788	8.62606	0.00331387	0.116657
BRADI_3g26810v3	-0.733324	3.28576	8.62178	0.00332167	0.116708
BRADI_3g04387v3	0.377807	8.05036	8.61376	0.00333632	0.117
BRADI_1g12780v3	-0.523033	3.58946	8.58004	0.00339868	0.11896
BRADI_1g20106v3	0.610206	3.07311	8.56968	0.00341806	0.119311
BRADI_4g17260v3	0.948795	5.25817	8.56777	0.00342167	0.119311
BRADI_3g52290v3	-0.462856	5.05993	8.55553	0.00344474	0.11974
BRADI_5g13190v3	-0.421301	4.63887	8.55435	0.00344697	0.11974
BRADI_1g38630v3	0.611024	6.54886	8.52847	0.00349633	0.120959
BRADI_3g03340v3	0.572741	3.50592	8.52603	0.00350102	0.120959
BRADI_5g16980v3	0.429573	9.79834	8.52564	0.00350177	0.120959
BRADI_2g16810v3	0.34364	11.3938	8.50955	0.00353286	0.121339
BRADI_1g66527v3	-0.961512	1.59359	8.50736	0.00353712	0.121339
BRADI_2g13520v3	0.980351	1.6742	8.50573	0.0035403	0.121339
BRADI_1g64050v3	-1.4095	3.50193	8.5044	0.00354289	0.121339
BRADI_3g36920v3	0.499019	6.74786	8.50294	0.00354574	0.121339
BRADI_3g04681v3	0.541739	4.02885	8.47992	0.00359088	0.122656
BRADI_1g09537v3	0.367336	9.09128	8.46428	0.00362189	0.123486
BRADI_4g39310v3	-1.103	2.48313	8.43097	0.00368883	0.125536
BRADI_3g04580v3	-1.72745	-0.266937	8.4167	0.0037179	0.126292
BRADI_3g01950v3	0.425399	6.14122	8.40549	0.0037409	0.126619
BRADI_2g09195v3	1.06631	4.32684	8.4053	0.00374128	0.126619
BRADI_3g58080v3	1.56748	0.806429	8.39604	0.00376039	0.126891
BRADI_1g54970v3	0.337251	6.66646	8.39211	0.00376853	0.126891
BRADI_1g20385v3	0.559528	3.35532	8.39141	0.00376999	0.126891
BRADI_4g40800v3	0.325283	9.82137	8.37609	0.00380189	0.127731
BRADI_5g16630v3	-1.35936	0.433725	8.366	0.00382307	0.128209
BRADI_5g20840v3	0.427609	5.74663	8.3596	0.00383656	0.128427
BRADI_1g47618v3	-1.14759	0.549528	8.35378	0.00384886	0.128605
BRADI_1g07140v3	0.445725	8.47092	8.34063	0.00387682	0.129305
BRADI_3g36407v3	1.44449	0.342621	8.29365	0.00397839	0.132452
BRADI_3g43890v3	-0.839148	4.2872	8.28665	0.00399376	0.132724
BRADI_5g09940v3	0.527231	5.42422	8.27663	0.00401587	0.133218
BRADI_5g19560v3	0.355584	7.31225	8.26956	0.00403153	0.133389
BRADI_1g65600v3	0.427654	5.17634	8.26777	0.00403551	0.133389
BRADI_5g15020v3	0.45428	5.64441	8.26424	0.00404336	0.133409
BRADI_4g09637v3	0.521268	3.62427	8.25776	0.00405781	0.133646
BRADI_3g22680v3	-0.560822	3.18031	8.24946	0.00407641	0.133844
BRADI_4g14080v3	0.460861	4.23271	8.2486	0.00407835	0.133844
BRADI_5g01950v3	0.521768	8.23498	8.24445	0.00408768	0.133911
BRADI_1g24220v3	0.408046	4.52603	8.23548	0.00410794	0.134336
BRADI_4g36880v3	-0.426668	4.33664	8.23048	0.00411925	0.134467
BRADI_2g33540v3	-1.69794	0.591324	8.21454	0.0041556	0.135129
BRADI_3g16440v3	0.417985	6.0632	8.21429	0.00415618	0.135129
BRADI_4g38440v3	0.327359	8.15787	8.21195	0.00416154	0.135129
BRADI_4g40430v3	0.681617	2.61476	8.20296	0.00418221	0.135561
BRADI_2g55210v3	-0.372444	5.9494	8.19891	0.00419155	0.135625
BRADI_3g16040v3	0.471634	7.56791	8.18902	0.00421447	0.136127
BRADI_5g05173v3	0.85586	1.51393	8.18076	0.0042337	0.136358
BRADI_4g16093v3	2.48411	0.145915	8.1796	0.00423641	0.136358
BRADI_5g11240v3	0.634977	4.89501	8.16825	0.004263	0.136974
BRADI_1g33030v3	0.514149	7.22791	8.14123	0.00432699	0.138664
BRADI_1g03867v3	-0.647278	3.00104	8.13828	0.00433405	0.138664
BRADI_3g09150v3	-0.408359	5.42082	8.13654	0.00433819	0.138664
BRADI_2g18760v3	-0.852378	1.39641	8.13087	0.00435178	0.138857
BRADI_1g64120v3	-0.362652	8.82291	8.12605	0.00436336	0.138986
BRADI_3g52690v3	0.443771	8.82705	8.11109	0.00439952	0.139896
BRADI_1g29000v3	0.351684	11.4476	8.10297	0.00441928	0.140282
BRADI_3g27260v3	0.424257	5.59027	8.09537	0.00443785	0.140629
BRADI_3g43235v3	-1.46595	0.868731	8.08012	0.00447536	0.141379
BRADI_3g05160v3	0.505223	5.966	8.0795	0.00447688	0.141379
BRADI_1g29590v3	0.470215	10.0464	8.06621	0.00450983	0.141733
BRADI_5g15970v3	-0.333761	8.5662	8.06613	0.00451002	0.141733
BRADI_2g49310v3	0.434519	6.71916	8.06477	0.00451342	0.141733
BRADI_1g09420v3	-0.428483	4.96317	8.06258	0.00451888	0.141733
BRADI_3g10200v3	0.363422	6.96951	8.04741	0.00455687	0.142681
BRADI_4g40270v3	0.486674	4.70989	8.04145	0.00457189	0.142908
BRADI_5g12100v3	0.390445	6.60805	8.00755	0.00465826	0.145091
BRADI_5g07390v3	0.36405	6.4203	8.0068	0.0046602	0.145091
BRADI_3g38897v3	0.498603	7.15995	8.0048	0.00466536	0.145091
BRADI_1g52670v3	0.659353	4.91274	8.00148	0.00467391	0.145112
BRADI_1g41808v3	0.841215	2.14037	7.98591	0.00471427	0.145902
BRADI_3g53900v3	1.24618	0.707194	7.98556	0.00471519	0.145902
BRADI_4g27850v3	-0.427907	4.29001	7.98155	0.00472566	0.14598
BRADI_1g58830v3	-0.380224	6.77055	7.96952	0.00475715	0.146707
BRADI_2g24680v3	0.431388	4.59161	7.94646	0.00481815	0.148054
BRADI_1g71840v3	0.394011	5.75696	7.94434	0.0048238	0.148054
BRADI_2g16290v3	0.328817	13.3176	7.94391	0.00482495	0.148054
BRADI_1g63490v3	0.488228	6.07125	7.93631	0.00484525	0.148429
BRADI_5g22146v3	-0.506915	3.34831	7.92651	0.00487157	0.148987
BRADI_5g22290v3	0.332909	9.93188	7.9195	0.00489047	0.149173
BRADI_1g76300v3	0.422036	5.53915	7.91422	0.00490477	0.149173
BRADI_4g38250v3	-0.902266	2.47687	7.91331	0.00490725	0.149173
BRADI_2g06150v3	-0.488918	6.01167	7.91005	0.00491609	0.149173
BRADI_2g09187v3	0.816581	4.62681	7.90929	0.00491815	0.149173
BRADI_2g49120v3	-0.467752	4.19341	7.8953	0.00495633	0.150084
BRADI_4g13260v3	0.327541	6.93325	7.88745	0.00497789	0.150456
BRADI_2g51860v3	0.383319	5.06401	7.88489	0.00498496	0.150456
BRADI_2g10770v3	0.373413	11.4967	7.86114	0.00505085	0.152024
BRADI_2g07630v3	0.616941	3.71243	7.85784	0.00506007	0.152024
BRADI_5g02260v3	0.332509	7.6339	7.85726	0.0050617	0.152024
BRADI_1g58057v3	-1.22941	0.995261	7.85114	0.00507888	0.152288
BRADI_5g16160v3	-0.523442	6.52597	7.84824	0.00508702	0.152288
BRADI_2g46502v3	-0.463979	5.85328	7.83116	0.00513531	0.153429
BRADI_1g29090v3	0.372282	8.47778	7.82888	0.00514179	0.153429
BRADI_3g41270v3	0.477996	8.00528	7.81556	0.00517984	0.154314
BRADI_1g46850v3	1.04721	1.33564	7.80553	0.00520865	0.154922
BRADI_1g66220v3	-0.341067	6.24648	7.79974	0.00522539	0.155125
BRADI_2g23750v3	-0.748086	5.74846	7.79365	0.00524301	0.155125
BRADI_2g38270v3	-0.795208	2.02116	7.79176	0.0052485	0.155125
BRADI_1g06695v3	0.509261	7.24875	7.79152	0.0052492	0.155125
BRADI_1g36260v3	0.328542	9.45964	7.76132	0.00533769	0.157487
BRADI_2g50035v3	1.29289	0.118075	7.75428	0.00535855	0.157705
BRADI_1g27382v3	-1.01485	1.05603	7.75303	0.00536226	0.157705
BRADI_2g25200v3	-0.5707	2.91356	7.75017	0.00537076	0.157705
BRADI_5g01686v3	0.542915	4.26999	7.74324	0.00539139	0.158059
BRADI_2g25640v3	0.360523	6.44097	7.73405	0.00541891	0.158473
BRADI_2g57500v3	-0.516784	3.86517	7.73277	0.00542274	0.158473
BRADI_2g42855v3	-0.599014	3.62584	7.71349	0.00548098	0.159737
BRADI_4g01100v3	0.611009	5.74135	7.71271	0.00548335	0.159737
BRADI_3g12760v3	0.413239	4.54739	7.69707	0.00553105	0.16077
BRADI_1g04780v3	-1.00189	3.80356	7.69537	0.00553627	0.16077
BRADI_1g56850v3	-1.24192	2.9863	7.68173	0.00557828	0.161735
BRADI_1g53747v3	0.990158	1.86918	7.66703	0.0056239	0.162609
BRADI_1g36720v3	-0.978663	1.27152	7.66633	0.00562607	0.162609
BRADI_3g53650v3	-0.410117	4.33021	7.65861	0.0056502	0.16305
BRADI_5g02990v3	0.503234	5.77059	7.6542	0.00566403	0.163193
BRADI_4g26450v3	-0.671745	2.53943	7.63757	0.00571649	0.164272
BRADI_2g60010v3	1.01536	2.1589	7.63668	0.00571932	0.164272
BRADI_5g02490v3	0.413326	7.07048	7.6285	0.0057453	0.164285
BRADI_4g22070v3	-0.983813	1.14322	7.62581	0.00575389	0.164285
BRADI_1g15547v3	-1.0412	1.24589	7.62558	0.00575462	0.164285
BRADI_2g53190v3	-0.843876	2.25906	7.62531	0.00575547	0.164285
BRADI_2g26940v3	0.412066	8.4854	7.61894	0.00577584	0.164413
BRADI_2g12520v3	0.364222	5.44508	7.61832	0.00577782	0.164413
BRADI_1g34470v3	-0.431675	4.5635	7.60655	0.00581567	0.165235
BRADI_1g23716v3	-0.648482	3.38504	7.60376	0.00582469	0.165236
BRADI_1g75960v3	0.33681	7.06199	7.59793	0.00584355	0.165474
BRADI_3g56720v3	0.40229	6.24105	7.59561	0.00585106	0.165474
BRADI_2g59660v3	0.353692	6.52434	7.59251	0.00586112	0.165505
BRADI_3g53390v3	-0.504158	3.19489	7.5852	0.00588495	0.165686
BRADI_2g31770v3	0.432561	7.39581	7.58502	0.00588552	0.165686
BRADI_1g47320v3	-0.324669	6.07417	7.57872	0.00590613	0.166012
BRADI_4g00640v3	0.420189	5.31195	7.57588	0.00591546	0.166021
BRADI_2g58590v3	-0.830644	2.90508	7.57058	0.00593287	0.166256
BRADI_2g50850v3	-0.687529	3.56648	7.56513	0.00595085	0.16642
BRADI_4g30667v3	0.78137	2.81273	7.56264	0.00595907	0.16642
BRADI_1g19130v3	0.543076	3.31193	7.56059	0.00596583	0.16642
BRADI_2g14330v3	-0.392761	4.89839	7.55266	0.00599215	0.166901
BRADI_1g74540v3	0.801083	2.57634	7.54785	0.00600816	0.166915
BRADI_1g55954v3	1.20661	0.322215	7.54534	0.00601653	0.166915
BRADI_1g46500v3	-0.384687	5.73302	7.54435	0.00601984	0.166915
BRADI_1g69340v3	-0.475756	4.08867	7.54123	0.0060303	0.166953
BRADI_1g77280v3	-0.784943	1.85342	7.53789	0.00604146	0.167011
BRADI_5g13550v3	-0.528132	3.9092	7.53163	0.00606251	0.167244
BRADI_2g24370v3	0.346893	6.35602	7.52998	0.00606806	0.167244
BRADI_3g37030v3	0.431355	3.89903	7.49045	0.0062027	0.17057
BRADI_2g23220v3	0.455904	7.65381	7.48904	0.00620757	0.17057
BRADI_5g25440v3	-0.659699	4.55316	7.48644	0.00621653	0.17057
BRADI_1g47130v3	1.33637	0.93872	7.4824	0.00623049	0.170699
BRADI_1g20930v3	0.707287	3.16235	7.47406	0.00625943	0.171237
BRADI_2g56033v3	1.50037	-0.0677958	7.4665	0.00628576	0.17157
BRADI_4g00530v3	-0.42657	6.78874	7.4639	0.00629483	0.17157
BRADI_4g11550v3	0.556921	2.94276	7.46255	0.00629957	0.17157
BRADI_3g44810v3	0.520847	3.78511	7.45963	0.00630978	0.171594
BRADI_1g36530v3	-0.481615	5.98411	7.45594	0.00632276	0.171694
BRADI_5g26310v3	-0.756452	1.8359	7.45002	0.00634356	0.172005
BRADI_3g02640v3	0.436049	4.35749	7.43746	0.00638801	0.172086
BRADI_2g05090v3	0.783204	2.36934	7.43648	0.00639149	0.172086
BRADI_3g02817v3	0.336959	6.34406	7.433	0.00640383	0.172086
BRADI_2g57027v3	1.65863	0.183447	7.42871	0.00641915	0.172086
BRADI_3g59210v3	1.18714	3.85687	7.42865	0.00641935	0.172086
BRADI_3g26385v3	0.870719	2.02915	7.42677	0.00642607	0.172086
BRADI_3g30790v3	-0.500648	3.76768	7.42412	0.00643554	0.172086
BRADI_3g09920v3	0.601614	3.50206	7.42274	0.00644045	0.172086
BRADI_4g31460v3	-0.353071	5.85168	7.42225	0.00644222	0.172086
BRADI_2g23950v3	-0.411593	4.08905	7.42129	0.00644566	0.172086
BRADI_2g57887v3	0.46676	4.30386	7.42025	0.00644938	0.172086
BRADI_3g42700v3	0.350513	8.27365	7.41534	0.006467	0.172148
BRADI_4g40010v3	1.16336	6.12036	7.41439	0.00647041	0.172148
BRADI_4g18811v3	0.613156	2.91393	7.41089	0.00648304	0.172236
BRADI_2g30370v3	0.573004	6.39749	7.39332	0.00654666	0.173675
BRADI_5g24170v3	0.422045	4.48857	7.38936	0.00656107	0.173807
BRADI_3g58900v3	0.930139	1.71537	7.38503	0.00657688	0.173976
BRADI_4g31470v3	0.425383	4.02519	7.37933	0.00659778	0.174278
BRADI_1g27290v3	0.496457	3.54501	7.36764	0.00664079	0.175015
BRADI_2g56030v3	0.303178	10.0435	7.36588	0.0066473	0.175015
BRADI_2g12057v3	1.02962	4.78087	7.36401	0.00665422	0.175015
BRADI_1g18050v3	0.325057	11.1659	7.35596	0.0066841	0.175551
BRADI_1g68710v3	0.546868	5.12282	7.34992	0.00670656	0.17589
BRADI_3g22802v3	-1.35243	3.52585	7.34412	0.00672826	0.176208
BRADI_1g61757v3	0.501534	5.31453	7.3395	0.00674554	0.176323
BRADI_2g36600v3	-0.851766	1.28372	7.33783	0.00675182	0.176323
BRADI_1g30960v3	-1.00295	0.850375	7.32411	0.00680357	0.177423
BRADI_2g58967v3	0.73416	3.31134	7.32119	0.00681461	0.177459
BRADI_2g60680v3	-1.35254	3.15211	7.30119	0.00689089	0.179192
BRADI_5g27130v3	1.507	0.0983224	7.29797	0.00690327	0.179261
BRADI_3g06340v3	-1.31772	0.411651	7.29388	0.006919	0.179417
BRADI_1g23710v3	-1.21459	1.29537	7.28585	0.00694998	0.179808
BRADI_4g13626v3	-0.360205	6.63165	7.2849	0.00695365	0.179808
BRADI_2g53260v3	-0.72918	2.86098	7.27852	0.00697842	0.180196
BRADI_2g41890v3	0.363335	7.54795	7.27091	0.00700803	0.180296
BRADI_4g33640v3	0.420931	4.18097	7.26912	0.00701503	0.180296
BRADI_4g28000v3	-0.499328	5.33797	7.2676	0.00702095	0.180296
BRADI_4g40780v3	0.44904	11.3129	7.26747	0.00702147	0.180296
BRADI_4g09190v3	-1.11039	0.686073	7.25777	0.0070595	0.18102
BRADI_1g63290v3	0.484297	6.26132	7.23737	0.00714016	0.182834
BRADI_1g09410v3	-1.24686	5.0868	7.23216	0.0071609	0.18311
BRADI_3g22740v3	0.345682	7.70124	7.22912	0.00717304	0.183166
BRADI_4g01640v3	0.352064	8.40982	7.22316	0.00719689	0.183521
BRADI_3g07230v3	0.679636	4.10551	7.2188	0.00721441	0.183713
BRADI_1g09431v3	0.525168	6.75343	7.21228	0.00724066	0.184127
BRADI_1g60100v3	0.388791	7.33778	7.20885	0.00725451	0.184224
BRADI_1g08210v3	-0.497359	3.46925	7.20412	0.00727365	0.184407
BRADI_3g29580v3	-0.626531	3.98039	7.20193	0.00728252	0.184407
BRADI_2g52610v3	0.364468	6.27041	7.19858	0.00729613	0.184407
BRADI_4g09120v3	-1.49795	5.63312	7.19719	0.00730177	0.184407
BRADI_2g54660v3	-0.97932	1.67896	7.1865	0.0073454	0.184682
BRADI_5g08520v3	-0.656244	2.35	7.18449	0.00735366	0.184682
BRADI_4g10655v3	0.385835	4.62767	7.18411	0.00735521	0.184682
BRADI_5g24810v3	-0.87447	1.83084	7.18335	0.00735831	0.184682
BRADI_1g14745v3	0.578828	4.8814	7.17959	0.00737375	0.184682
BRADI_1g28160v3	0.392291	4.40335	7.17428	0.00739559	0.184682
BRADI_5g24231v3	1.26466	1.93808	7.17179	0.00740587	0.184682
BRADI_1g49690v3	-1.30504	0.861672	7.16509	0.0074336	0.184682
BRADI_5g12430v3	0.359106	8.08182	7.1642	0.0074373	0.184682
BRADI_1g25552v3	-0.517189	4.22106	7.16412	0.00743762	0.184682
BRADI_3g53860v3	0.530266	6.00224	7.16208	0.00744609	0.184682
BRADI_2g58940v3	-0.43591	3.89177	7.16106	0.00745033	0.184682
BRADI_3g48010v3	0.561003	2.77892	7.16061	0.00745219	0.184682
BRADI_1g24640v3	1.11972	1.48057	7.16039	0.00745309	0.184682
BRADI_3g59440v3	0.411786	8.13149	7.14224	0.00752889	0.18631
BRADI_2g48340v3	0.519586	7.8038	7.13798	0.00754681	0.186502
BRADI_4g07130v3	-0.658225	5.69791	7.12985	0.00758109	0.187098
BRADI_3g33770v3	0.451781	6.3576	7.12542	0.00759984	0.18731
BRADI_4g06750v3	-0.360194	5.99834	7.12249	0.00761227	0.187366
BRADI_1g37337v3	-0.471877	6.0162	7.11557	0.00764171	0.187839
BRADI_3g28520v3	0.496002	4.66923	7.1124	0.00765527	0.187922
BRADI_2g48082v3	-0.441973	4.51749	7.10756	0.00767594	0.188178
BRADI_3g57380v3	0.35585	9.53641	7.10445	0.00768929	0.188255
BRADI_3g22330v3	0.300362	7.87317	7.09389	0.00773473	0.189116
BRADI_4g36380v3	-0.941677	1.21512	7.08492	0.00777352	0.189812
BRADI_1g56706v3	0.929687	1.09912	7.07383	0.00782181	0.190436
ENSRNA049996238	1.11133	1.20815	7.07205	0.00782955	0.190436
BRADI_2g10960v3	0.518707	6.34368	7.07106	0.00783388	0.190436
BRADI_2g44440v3	0.412698	7.48828	7.06956	0.00784044	0.190436
BRADI_3g34280v3	0.436493	5.3954	7.06362	0.00786647	0.190816
BRADI_2g38300v3	-0.839372	2.11671	7.0597	0.00788373	0.190983
BRADI_1g56260v3	1.38879	2.17869	7.0572	0.00789475	0.190999
BRADI_1g54106v3	0.547005	4.01592	7.053	0.00791325	0.191019
BRADI_2g52530v3	-1.72553	-0.0156902	7.0523	0.00791634	0.191019
BRADI_2g17390v3	0.358247	6.15492	7.04834	0.00793386	0.19114
BRADI_4g29430v3	0.567534	4.80795	7.04648	0.00794212	0.19114
BRADI_5g23580v3	1.35636	-0.0690329	7.0427	0.00795888	0.191278
BRADI_1g77100v3	0.509274	6.2477	7.03508	0.00799283	0.191278
BRADI_4g34970v3	0.404589	4.02417	7.03291	0.00800251	0.191278
BRADI_3g53720v3	0.69289	3.71304	7.0326	0.00800392	0.191278
BRADI_4g44496v3	-1.53208	2.00127	7.03111	0.00801059	0.191278
BRADI_3g06120v3	-0.375989	6.18407	7.03098	0.00801115	0.191278
BRADI_2g18448v3	1.42759	0.450616	7.02675	0.0080301	0.191278
BRADI_2g14870v3	0.469987	3.74609	7.02449	0.00804023	0.191278
BRADI_1g50550v3	0.488677	5.01507	7.02425	0.00804133	0.191278
BRADI_2g12780v3	0.31146	7.22543	6.99781	0.00816093	0.193611
BRADI_2g46510v3	0.402368	5.65247	6.996	0.00816921	0.193611
BRADI_4g10610v3	-1.33136	-0.0577002	6.99561	0.00817097	0.193611
BRADI_1g70780v3	-0.334359	6.49937	6.99275	0.00818403	0.193671
ENSRNA049998181	0.660754	10.1087	6.98225	0.00823221	0.194561
BRADI_1g03180v3	0.323302	8.78786	6.97832	0.0082503	0.194739
BRADI_1g09637v3	-1.41286	0.0822379	6.95331	0.00836643	0.197227
BRADI_4g21170v3	0.326832	13.2117	6.94776	0.00839244	0.197587
BRADI_5g03370v3	-0.987251	0.840092	6.94366	0.0084117	0.197788
BRADI_5g09557v3	1.10613	0.322631	6.93774	0.00843956	0.19819
BRADI_5g12510v3	-0.408419	6.44279	6.91904	0.00852829	0.199647
BRADI_1g46690v3	0.414424	5.38732	6.91822	0.00853221	0.199647
BRADI_1g07126v3	0.73465	1.99187	6.91781	0.00853413	0.199647
BRADI_1g68830v3	0.414334	5.36012	6.9131	0.00855667	0.19992
BRADI_2g12067v3	0.35315	8.67517	6.90005	0.00861935	0.201129
BRADI_1g37100v3	0.905499	3.83789	6.89462	0.00864553	0.201485
BRADI_4g38260v3	0.306746	9.01655	6.87954	0.0087188	0.202935
BRADI_3g46247v3	0.387166	7.67169	6.87182	0.00875653	0.203556
BRADI_2g18060v3	0.681143	3.91221	6.86438	0.00879308	0.203929
BRADI_3g12710v3	-0.993587	0.80039	6.86405	0.00879471	0.203929
BRADI_1g01770v3	0.63715	4.51929	6.85676	0.00883067	0.204471
BRADI_1g26765v3	-0.464367	6.31018	6.85481	0.00884032	0.204471
BRADI_1g18320v3	0.310208	7.59579	6.84775	0.00887532	0.205023
BRADI_1g76190v3	0.442508	4.08683	6.84232	0.00890232	0.205389
BRADI_3g17730v3	-1.29822	0.0130622	6.83611	0.00893334	0.205689
BRADI_4g30081v3	0.765593	3.02944	6.83236	0.00895207	0.205689
BRADI_4g18840v3	-0.691224	2.11991	6.83146	0.00895658	0.205689
BRADI_1g42410v3	0.407866	3.79581	6.83078	0.00896001	0.205689
BRADI_2g52710v3	0.6064	6.11389	6.81865	0.00902106	0.206833
BRADI_4g09260v3	-0.490326	3.34422	6.81481	0.00904049	0.206893
BRADI_2g39200v3	0.374917	9.54291	6.81369	0.00904618	0.206893
BRADI_2g38750v3	0.302635	6.72903	6.80866	0.00907167	0.207081
BRADI_3g34517v3	0.359835	7.73147	6.80764	0.00907688	0.207081
BRADI_1g58256v3	-0.447962	3.55192	6.79944	0.00911867	0.207777
BRADI_2g24700v3	1.06777	0.549806	6.79222	0.00915559	0.208255
BRADI_2g37160v3	0.510846	3.7256	6.79092	0.00916227	0.208255
BRADI_3g45140v3	0.366496	7.26736	6.78539	0.00919068	0.208643
BRADI_2g07550v3	0.801904	6.12625	6.77561	0.00924118	0.209393
BRADI_3g03642v3	-0.490587	3.96361	6.77459	0.00924645	0.209393
BRADI_4g29622v3	-0.490815	4.63793	6.76629	0.00928959	0.210111
BRADI_1g61986v3	-0.659595	2.4733	6.76205	0.00931169	0.210353
BRADI_5g03960v3	-0.652507	3.0667	6.75664	0.00933995	0.210733
BRADI_2g52800v3	0.430169	4.12228	6.75311	0.00935843	0.21078
BRADI_2g35625v3	0.602206	3.1142	6.75187	0.00936496	0.21078
BRADI_3g47690v3	0.358144	9.54853	6.74759	0.00938744	0.211028
BRADI_1g25564v3	-0.550805	3.22941	6.7373	0.00944175	0.21199
BRADI_1g74180v3	0.347865	6.63023	6.7332	0.00946349	0.21222
BRADI_1g67620v3	0.462461	4.91476	6.72073	0.00952984	0.213164
BRADI_3g14950v3	0.310083	7.25411	6.72016	0.00953292	0.213164
BRADI_1g32060v3	-1.62061	3.82096	6.71877	0.00954035	0.213164
BRADI_3g59790v3	0.413906	6.79421	6.71293	0.00957164	0.213604
BRADI_3g58327v3	-0.43677	3.9967	6.70233	0.00962872	0.214476
BRADI_2g04070v3	-0.457882	3.71194	6.70055	0.0096383	0.214476
BRADI_1g09760v3	0.319233	6.23454	6.6992	0.00964564	0.214476
BRADI_1g56890v3	0.413998	5.42099	6.69619	0.00966193	0.214579
BRADI_3g10160v3	0.587435	4.23922	6.68859	0.00970319	0.215236
BRADI_2g33620v3	0.433177	5.4679	6.68574	0.0097187	0.21532
BRADI_4g31220v3	0.403649	6.33071	6.68246	0.00973663	0.215458
BRADI_1g68680v3	-0.59857	2.97202	6.6748	0.00977853	0.216126
BRADI_1g43152v3	0.659271	3.09112	6.66841	0.00981365	0.216642
BRADI_3g51970v3	-0.496657	3.26225	6.65832	0.00986941	0.217612
BRADI_1g55350v3	-0.436274	4.3126	6.65617	0.00988133	0.217614
BRADI_1g44767v3	0.439997	4.86315	6.6512	0.00990889	0.21796
BRADI_2g56960v3	0.284683	7.87727	6.64633	0.00993602	0.218296
BRADI_1g24340v3	0.546779	6.49665	6.64074	0.00996723	0.218721
BRADI_4g20537v3	0.428691	4.45209	6.63428	0.0100035	0.219254
BRADI_5g20320v3	-0.408841	8.23295	6.63023	0.0100262	0.219492
BRADI_2g11740v3	-0.76158	3.73178	6.62182	0.0100737	0.220269
BRADI_4g11360v3	0.423992	4.91301	6.61825	0.0100939	0.22045
BRADI_3g20207v3	0.660094	2.30308	6.6158	0.0101078	0.220491
BRADI_1g11270v3	0.383815	7.43206	6.60816	0.0101513	0.221177
BRADI_1g69010v3	0.377977	4.3433	6.60172	0.010188	0.221525
BRADI_1g14422v3	-0.510064	4.5208	6.60115	0.0101913	0.221525
BRADI_2g20790v3	0.516118	3.44937	6.59496	0.0102268	0.221739
BRADI_3g05253v3	0.777608	1.30425	6.59428	0.0102307	0.221739
BRADI_1g41970v3	0.734946	2.47713	6.59153	0.0102465	0.221739
BRADI_5g26231v3	0.524007	3.29794	6.59105	0.0102493	0.221739
BRADI_3g22720v3	0.366935	7.8216	6.58776	0.0102682	0.221887
BRADI_3g30152v3	0.755326	2.71305	6.57969	0.0103149	0.222297
BRADI_5g26500v3	0.376453	4.52904	6.57882	0.0103199	0.222297
BRADI_4g12180v3	0.475968	5.72145	6.57822	0.0103234	0.222297
BRADI_3g19630v3	0.300262	7.61367	6.56852	0.0103798	0.223251
BRADI_3g13320v3	-0.46318	3.80382	6.56113	0.010423	0.223919
BRADI_1g34513v3	0.316011	6.70267	6.53009	0.0106065	0.227594
BRADI_3g54370v3	1.08125	3.02573	6.52338	0.0106465	0.228188
BRADI_1g33097v3	0.576249	4.67019	6.51012	0.0107262	0.229063
BRADI_1g06900v3	-0.62726	2.5124	6.50911	0.0107323	0.229063
BRADI_1g56870v3	-0.587679	2.83758	6.50863	0.0107352	0.229063
BRADI_3g11370v3	0.360321	5.47893	6.50831	0.0107371	0.229063
BRADI_3g40337v3	0.340744	5.63154	6.49993	0.0107878	0.229879
BRADI_1g72560v3	0.379209	7.54184	6.4931	0.0108294	0.230497
BRADI_2g25400v3	-0.348346	4.84354	6.48856	0.0108571	0.230819
BRADI_5g13960v3	-0.396416	4.77381	6.48559	0.0108753	0.230824
BRADI_4g20197v3	1.19427	7.15731	6.48443	0.0108824	0.230824
BRADI_4g25490v3	0.54341	4.75035	6.48001	0.0109094	0.23097
BRADI_1g14983v3	-0.399015	5.24827	6.47921	0.0109143	0.23097
BRADI_5g03400v3	1.08678	1.8053	6.46805	0.0109831	0.232005
BRADI_3g13403v3	-1.1055	1.2544	6.46407	0.0110077	0.232005
BRADI_3g45840v3	0.37886	7.8675	6.46316	0.0110133	0.232005
BRADI_2g56037v3	-0.358998	6.03278	6.46203	0.0110204	0.232005
BRADI_3g55440v3	-0.346548	8.50904	6.45999	0.0110331	0.232005
ENSRNA049997988	3.12351	1.66996	6.45905	0.0110388	0.232005
BRADI_1g24860v3	0.340636	9.76156	6.45543	0.0110614	0.232157
BRADI_3g44335v3	0.329878	8.09713	6.45383	0.0110713	0.232157
BRADI_2g50810v3	0.332949	7.01914	6.44621	0.0111189	0.23289
BRADI_1g12330v3	0.340462	4.85997	6.43787	0.0111712	0.23372
BRADI_2g12300v3	0.33327	6.84015	6.43305	0.0112016	0.234089
BRADI_4g35230v3	-0.841228	1.21641	6.42951	0.0112239	0.23429
BRADI_1g12397v3	-1.32616	-0.158535	6.41363	0.0113247	0.234967
BRADI_1g65467v3	0.329987	6.56833	6.41321	0.0113274	0.234967
BRADI_2g47720v3	0.426191	5.04669	6.40953	0.0113509	0.234967
BRADI_1g26520v3	0.720051	4.63849	6.40938	0.0113519	0.234967
BRADI_3g21588v3	-0.530371	3.04687	6.40699	0.0113672	0.234967
BRADI_3g13970v3	0.292032	9.6884	6.40678	0.0113685	0.234967
BRADI_1g50826v3	0.35375	5.00431	6.40565	0.0113758	0.234967
BRADI_1g33390v3	-0.42001	4.04234	6.40556	0.0113763	0.234967
BRADI_1g12040v3	-0.458214	4.03481	6.40516	0.0113789	0.234967
BRADI_1g34830v3	-0.420463	3.92572	6.40437	0.011384	0.234967
BRADI_3g55190v3	0.422246	6.18895	6.39551	0.011441	0.235878
BRADI_4g32787v3	0.573686	2.61675	6.38525	0.0115073	0.23698
BRADI_2g45450v3	-0.852724	6.63131	6.38276	0.0115234	0.237047
BRADI_5g15027v3	0.405408	5.53249	6.37736	0.0115585	0.23732
BRADI_1g09940v3	0.390646	6.35599	6.37676	0.0115625	0.23732
BRADI_1g17060v3	-0.936695	2.73837	6.37422	0.011579	0.237395
BRADI_1g13226v3	0.340897	6.22234	6.37051	0.0116032	0.237627
BRADI_3g45940v3	-0.409692	5.31755	6.36779	0.011621	0.237727
BRADI_3g56917v3	1.41632	0.805379	6.36246	0.011656	0.238179
BRADI_2g24870v3	1.23622	0.644611	6.35867	0.0116809	0.238323
BRADI_2g44980v3	0.496773	4.73597	6.35455	0.0117081	0.238323
BRADI_1g62063v3	0.361966	4.47396	6.3507	0.0117335	0.238323
BRADI_3g48140v3	-0.496992	4.02502	6.3494	0.0117421	0.238323
BRADI_2g13780v3	-1.06136	0.380334	6.34718	0.0117568	0.238323
BRADI_2g58912v3	0.31948	7.02063	6.34648	0.0117614	0.238323
BRADI_1g16710v3	-0.424862	4.10474	6.34637	0.0117622	0.238323
BRADI_5g15570v3	0.487027	4.13125	6.3457	0.0117666	0.238323
BRADI_2g18310v3	-0.414066	4.92212	6.3328	0.0118525	0.239566
BRADI_1g34407v3	-0.565771	2.88487	6.33222	0.0118564	0.239566
BRADI_5g04600v3	0.473973	3.06738	6.33049	0.011868	0.239566
BRADI_3g34245v3	0.501111	5.81241	6.32862	0.0118805	0.239566
BRADI_1g68360v3	-1.10733	1.53084	6.32672	0.0118932	0.239566
BRADI_5g17560v3	0.852971	1.37119	6.32371	0.0119134	0.239566
ENSRNA049996246	1.99198	3.46791	6.32275	0.0119199	0.239566
BRADI_2g61500v3	0.36986	9.73936	6.31924	0.0119435	0.239566
BRADI_2g09191v3	0.967262	3.04033	6.319	0.0119451	0.239566
BRADI_1g51630v3	-0.399927	4.47659	6.31426	0.0119771	0.239856
BRADI_5g19180v3	-1.05618	4.52152	6.31299	0.0119856	0.239856
BRADI_1g64430v3	0.356019	5.9355	6.30692	0.0120267	0.240417
BRADI_1g61690v3	-0.599904	3.40428	6.29587	0.012102	0.241659
BRADI_2g25646v3	0.523671	4.91103	6.29276	0.0121232	0.241821
BRADI_2g35197v3	1.47489	1.87209	6.27947	0.0122145	0.243377
BRADI_5g19960v3	0.622437	3.34525	6.27479	0.0122468	0.243757
BRADI_4g16430v3	-0.287222	6.5329	6.27177	0.0122677	0.24391
BRADI_3g47550v3	0.325575	8.51921	6.26327	0.0123266	0.244817
BRADI_5g08840v3	-0.389091	4.58443	6.25952	0.0123528	0.245072
BRADI_5g27920v3	0.796606	2.23401	6.25444	0.0123883	0.245512
BRADI_1g17250v3	0.454233	4.75658	6.24908	0.0124258	0.245817
BRADI_3g26990v3	-1.16456	0.247606	6.24751	0.0124368	0.245817
BRADI_1g42990v3	-0.423957	3.95915	6.24653	0.0124437	0.245817
BRADI_1g54440v3	-0.36589	6.03663	6.24233	0.0124733	0.246136
BRADI_1g56817v3	-0.407796	3.61755	6.23852	0.0125001	0.246401
BRADI_1g49010v3	0.606514	7.52408	6.23642	0.0125149	0.24643
BRADI_2g24220v3	1.19923	4.21491	6.22986	0.0125614	0.247081
BRADI_3g47890v3	0.322578	7.76192	6.21995	0.0126319	0.248027
BRADI_4g05530v3	-1.06013	0.380171	6.21743	0.0126499	0.248027
BRADI_1g29520v3	-0.563792	3.06713	6.21577	0.0126617	0.248027
BRADI_2g52870v3	-0.606061	3.4424	6.21554	0.0126634	0.248027
BRADI_2g10278v3	0.416786	4.86697	6.21362	0.0126771	0.248032
BRADI_5g23470v3	1.7141	5.08233	6.20673	0.0127266	0.248602
BRADI_3g49570v3	0.27359	8.37845	6.20559	0.0127347	0.248602
BRADI_3g56497v3	-0.48658	3.23109	6.20224	0.0127588	0.248602
BRADI_2g09910v3	0.376426	5.23935	6.20205	0.0127603	0.248602
BRADI_2g60497v3	1.35993	2.37608	6.1985	0.0127858	0.248837
BRADI_1g51586v3	0.766816	1.37162	6.19505	0.0128108	0.24906
BRADI_1g36890v3	0.517343	2.88647	6.19067	0.0128425	0.249414
BRADI_1g23450v3	-0.557206	4.49483	6.17418	0.0129628	0.251484
BRADI_4g25740v3	0.978363	4.53428	6.16579	0.0130245	0.252282
BRADI_5g21030v3	-1.10463	0.579184	6.16211	0.0130515	0.252282
BRADI_2g59590v3	-0.844554	1.5216	6.16165	0.0130549	0.252282
BRADI_3g05050v3	-1.00674	0.671645	6.16113	0.0130588	0.252282
BRADI_2g12340v3	0.576232	4.98456	6.15749	0.0130857	0.252538
BRADI_1g76140v3	0.3442	5.17395	6.13999	0.0132158	0.254782
BRADI_5g14023v3	0.694205	3.1202	6.13243	0.0132724	0.255481
BRADI_3g36160v3	-0.761893	2.22348	6.13134	0.0132806	0.255481
BRADI_2g16005v3	-0.498175	2.96732	6.12847	0.0133022	0.255481
BRADI_2g45170v3	-0.600579	3.88702	6.12775	0.0133076	0.255481
BRADI_1g54327v3	0.352223	6.5082	6.12505	0.013328	0.25559
BRADI_1g02890v3	-0.716005	2.10297	6.12195	0.0133513	0.25559
BRADI_3g37171v3	-1.20596	0.26979	6.12148	0.0133549	0.25559
BRADI_3g28648v3	-0.302018	6.45362	6.11824	0.0133794	0.255628
BRADI_1g25600v3	-0.645535	2.93438	6.11754	0.0133847	0.255628
BRADI_3g38487v3	-1.03936	1.28046	6.1153	0.0134017	0.255688
BRADI_4g40727v3	-0.917103	3.89595	6.11265	0.0134217	0.255805
BRADI_3g29270v3	0.315149	6.77899	6.11007	0.0134414	0.255915
BRADI_4g11400v3	0.33315	6.70356	6.10396	0.013488	0.256367
BRADI_3g13280v3	-0.556104	2.79282	6.10287	0.0134962	0.256367
BRADI_1g54210v3	0.404021	8.27571	6.10007	0.0135177	0.256367
BRADI_1g59860v3	0.385594	8.09241	6.09845	0.0135301	0.256367
BRADI_3g45300v3	0.76072	2.23284	6.09691	0.0135418	0.256367
BRADI_4g05360v3	-0.848476	1.36652	6.09444	0.0135608	0.256367
BRADI_1g23610v3	0.351071	12.641	6.0942	0.0135626	0.256367
BRADI_1g30980v3	-2.04459	1.32703	6.09096	0.0135875	0.256575
BRADI_5g17123v3	0.51167	3.53111	6.08684	0.0136192	0.25691
BRADI_3g35370v3	-0.310876	7.18037	6.08213	0.0136556	0.257142
BRADI_2g30824v3	0.55626	3.11324	6.08162	0.0136595	0.257142
BRADI_4g22110v3	0.389257	5.42018	6.07618	0.0137017	0.257672
BRADI_4g29010v3	-0.31521	5.95263	6.06948	0.0137538	0.258389
BRADI_5g23182v3	-1.75782	1.36062	6.06364	0.0137993	0.25862
BRADI_5g13660v3	-0.417607	5.19941	6.0634	0.0138012	0.25862
BRADI_1g32960v3	-0.380214	4.95807	6.06098	0.0138201	0.25862
BRADI_1g14750v3	-0.662302	3.40523	6.0607	0.0138223	0.25862
BRADI_1g71360v3	-0.39797	5.23465	6.05634	0.0138565	0.258851
BRADI_1g77730v3	1.56446	1.49226	6.05466	0.0138696	0.258851
BRADI_4g30897v3	0.407119	4.36024	6.05278	0.0138844	0.258851
BRADI_4g07267v3	-0.567671	2.35961	6.05083	0.0138997	0.258851
BRADI_2g03910v3	-0.586839	4.02855	6.05017	0.0139049	0.258851
BRADI_2g51480v3	0.483262	10.5961	6.04088	0.0139783	0.259542
BRADI_2g14650v3	-0.551973	3.31219	6.04064	0.0139802	0.259542
BRADI_4g17131v3	0.340871	4.38088	6.04012	0.0139844	0.259542
BRADI_4g18990v3	-0.311536	6.74524	6.0221	0.0141278	0.261941
BRADI_1g34820v3	0.321194	5.61585	6.01354	0.0141965	0.26295
BRADI_5g24580v3	-0.34636	4.51862	6.01005	0.0142246	0.263205
BRADI_4g40460v3	-0.970517	0.549976	6.00581	0.0142588	0.263528
BRADI_3g09120v3	0.829831	5.75104	6.0034	0.0142783	0.263528
BRADI_4g33995v3	0.673407	1.81885	6.00096	0.0142981	0.263528
BRADI_1g78640v3	-0.482906	3.12043	6.00081	0.0142993	0.263528
BRADI_1g64267v3	0.304247	8.96295	5.98701	0.0144116	0.265296
BRADI_4g40040v3	-0.337488	7.76792	5.98549	0.0144241	0.265296
BRADI_2g57530v3	0.455173	5.12687	5.98292	0.0144451	0.265417
BRADI_2g41027v3	0.358756	4.29094	5.97296	0.0145269	0.266008
BRADI_4g03060v3	-0.350916	5.59397	5.97242	0.0145313	0.266008
BRADI_3g02790v3	0.357821	5.29559	5.97197	0.014535	0.266008
BRADI_3g07320v3	0.451966	4.64868	5.97197	0.014535	0.266008
BRADI_4g21990v3	-0.485838	3.58385	5.96247	0.0146136	0.267181
BRADI_1g14700v3	-0.636145	4.23461	5.94849	0.0147299	0.269041
BRADI_1g11720v3	0.334568	5.54083	5.94605	0.0147503	0.269134
BRADI_1g73935v3	0.780191	3.95481	5.94438	0.0147643	0.269134
BRADI_2g26287v3	0.399517	3.51461	5.93913	0.0148083	0.269429
BRADI_3g10887v3	1.56828	0.53616	5.93829	0.0148154	0.269429
BRADI_2g47710v3	1.20882	0.263258	5.93722	0.0148244	0.269429
BRADI_3g13980v3	0.39965	5.53651	5.93053	0.0148807	0.269866
BRADI_1g29570v3	1.606	2.09265	5.92906	0.0148932	0.269866
BRADI_1g55100v3	-0.396607	8.86307	5.92759	0.0149056	0.269866
BRADI_1g09042v3	-0.961409	0.985332	5.92742	0.0149071	0.269866
BRADI_4g08824v3	0.878084	1.9063	5.92551	0.0149233	0.269875
BRADI_1g59630v3	-1.28798	-0.0834738	5.92147	0.0149574	0.269875
BRADI_5g11320v3	-0.854648	1.22594	5.92035	0.014967	0.269875
BRADI_3g33860v3	-0.374739	4.41997	5.91991	0.0149707	0.269875
BRADI_1g77330v3	0.72833	3.92331	5.91526	0.0150103	0.269875
BRADI_2g18030v3	1.8803	5.21639	5.91335	0.0150266	0.269875
BRADI_5g22310v3	0.301108	7.56287	5.91328	0.0150272	0.269875
BRADI_1g55690v3	0.385614	5.89076	5.91198	0.0150382	0.269875
BRADI_1g26530v3	0.464746	9.53033	5.90685	0.0150821	0.269875
BRADI_4g31270v3	-0.415927	3.83992	5.90655	0.0150847	0.269875
BRADI_3g00480v3	-0.378901	5.6064	5.9062	0.0150877	0.269875
BRADI_3g39100v3	-0.394146	3.97618	5.90194	0.0151243	0.269875
BRADI_5g05692v3	0.76649	1.58591	5.90122	0.0151304	0.269875
BRADI_1g75920v3	-0.356509	4.05468	5.90072	0.0151347	0.269875
BRADI_1g76880v3	0.398538	6.27901	5.90033	0.015138	0.269875
BRADI_1g25460v3	0.412173	5.25197	5.89986	0.0151421	0.269875
BRADI_3g11460v3	0.431443	3.31044	5.89376	0.0151946	0.270549
BRADI_4g36120v3	-0.578545	5.04444	5.88092	0.0153058	0.272266
BRADI_2g27987v3	0.396872	3.95438	5.87646	0.0153446	0.272693
BRADI_4g08020v3	0.289366	11.7394	5.87471	0.0153599	0.272701
BRADI_5g12040v3	-0.623245	1.88393	5.86775	0.0154208	0.273518
BRADI_1g51470v3	0.374558	5.30121	5.85973	0.0154912	0.274429
BRADI_1g19054v3	0.592396	3.84769	5.85851	0.0155019	0.274429
BRADI_1g17090v3	0.814389	8.1334	5.85533	0.0155299	0.274451
BRADI_5g11750v3	0.350431	9.52745	5.85499	0.015533	0.274451
BRADI_2g11320v3	1.79608	1.30179	5.84966	0.01558	0.275018
BRADI_1g58160v3	0.291875	11.7489	5.84119	0.0156552	0.276081
BRADI_2g23520v3	0.555718	6.14502	5.83775	0.0156859	0.276096
BRADI_4g25342v3	0.864292	1.33666	5.83773	0.0156861	0.276096
BRADI_5g15130v3	0.29092	6.27726	5.83593	0.0157021	0.276115
BRADI_4g30170v3	0.362095	5.56682	5.82277	0.01582	0.277312
BRADI_2g24327v3	-0.53827	4.09397	5.82242	0.0158232	0.277312
BRADI_5g25740v3	2.48279	1.85522	5.82217	0.0158254	0.277312
BRADI_1g77120v3	-0.713706	2.80559	5.82009	0.0158441	0.277312
BRADI_3g41960v3	-0.62867	2.75125	5.81777	0.015865	0.277312
BRADI_2g50730v3	-0.422435	4.52152	5.81704	0.0158716	0.277312
BRADI_3g54230v3	-0.488244	3.41932	5.81659	0.0158757	0.277312
BRADI_1g72910v3	0.498048	5.74869	5.81469	0.0158929	0.27735
BRADI_2g04700v3	-0.788579	2.95395	5.8083	0.0159507	0.277985
BRADI_1g67760v3	0.596643	6.7611	5.80428	0.0159872	0.277985
BRADI_1g19470v3	-1.43035	2.37815	5.80412	0.0159887	0.277985
BRADI_1g32410v3	0.391357	3.90716	5.80345	0.0159948	0.277985
BRADI_3g33810v3	-0.337196	5.52414	5.79971	0.0160288	0.277985
BRADI_3g13160v3	0.728861	7.38251	5.79911	0.0160343	0.277985
BRADI_5g04080v3	-1.62736	7.28297	5.79903	0.016035	0.277985
BRADI_1g64452v3	-0.510099	2.98332	5.79607	0.016062	0.278155
BRADI_3g29750v3	0.325321	7.7446	5.79465	0.016075	0.278155
BRADI_5g11810v3	-0.347065	5.16113	5.78914	0.0161255	0.278766
BRADI_3g46547v3	1.75056	1.02366	5.78051	0.0162049	0.279678
BRADI_4g03390v3	-0.496266	3.83582	5.7801	0.0162086	0.279678
BRADI_5g01030v3	0.448564	4.72954	5.76472	0.0163511	0.281872
BRADI_2g52260v3	0.516032	4.15506	5.76204	0.0163761	0.282039
BRADI_1g55060v3	-0.594463	2.83199	5.75579	0.0164344	0.282779
BRADI_3g57117v3	-0.773545	1.14586	5.75043	0.0164847	0.283379
BRADI_1g70570v3	0.362654	4.92991	5.74265	0.0165578	0.284371
BRADI_2g02524v3	-0.629796	2.6124	5.73862	0.0165958	0.284758
BRADI_1g18332v3	0.807374	1.64818	5.73411	0.0166385	0.285225
BRADI_3g53370v3	0.314844	8.8661	5.72688	0.0167071	0.286135
BRADI_1g46596v3	0.330254	8.56841	5.71472	0.0168232	0.287855
BRADI_4g24846v3	0.318048	6.28972	5.70568	0.0169101	0.289074
BRADI_2g11360v3	0.345886	5.59923	5.69744	0.0169897	0.290165
BRADI_1g05390v3	-0.49726	3.26329	5.69451	0.017018	0.29021
BRADI_3g39740v3	2.20598	0.836849	5.6932	0.0170308	0.29021
BRADI_3g46270v3	0.423255	3.2734	5.69101	0.017052	0.29021
BRADI_4g31257v3	0.338753	6.72289	5.69066	0.0170554	0.29021
BRADI_4g31800v3	0.638352	4.73012	5.68612	0.0170996	0.290584
BRADI_3g28060v3	0.549001	4.44703	5.68383	0.0171219	0.290584
BRADI_4g26400v3	0.879756	0.659112	5.68319	0.0171282	0.290584
BRADI_3g21245v3	0.413043	4.04082	5.68192	0.0171406	0.290584
BRADI_2g60554v3	0.587837	2.70322	5.67968	0.0171625	0.290689
BRADI_2g31690v3	-0.59459	5.35491	5.67607	0.0171978	0.29102
BRADI_4g43680v3	-0.321564	5.14494	5.67281	0.0172298	0.291293
BRADI_1g47030v3	0.446374	3.67321	5.65899	0.0173662	0.293329
BRADI_3g21610v3	0.430374	4.93118	5.65415	0.0174142	0.293626
BRADI_5g07710v3	0.495592	3.55099	5.65399	0.0174157	0.293626
BRADI_4g24583v3	0.963353	0.582039	5.64672	0.0174881	0.294247
BRADI_5g15040v3	0.970244	0.63069	5.64481	0.0175071	0.294247
BRADI_3g07770v3	-0.895282	1.60264	5.64451	0.0175101	0.294247
BRADI_4g34990v3	-0.354163	4.40273	5.64388	0.0175164	0.294247
BRADI_3g14685v3	1.4163	0.764714	5.64096	0.0175456	0.294373
BRADI_4g31040v3	-0.401944	6.13494	5.63804	0.0175748	0.294373
BRADI_2g46360v3	0.431653	5.74765	5.63726	0.0175827	0.294373
BRADI_4g36220v3	0.318116	8.11094	5.63674	0.0175879	0.294373
BRADI_3g05400v3	0.279096	6.91182	5.63486	0.0176068	0.294422
BRADI_3g23251v3	0.500931	4.16513	5.6323	0.0176325	0.294449
BRADI_3g44590v3	0.367849	4.2329	5.63152	0.0176404	0.294449
BRADI_4g17046v3	-0.545541	2.70188	5.61969	0.0177598	0.296174
BRADI_1g03720v3	-0.290224	9.29066	5.61739	0.0177831	0.296293
BRADI_3g52400v3	0.297542	12.0851	5.61346	0.017823	0.29669
BRADI_2g22150v3	0.308111	6.53835	5.61029	0.0178553	0.296694
BRADI_3g14946v3	0.453745	3.89186	5.61028	0.0178555	0.296694
BRADI_1g64226v3	0.779553	1.42714	5.60867	0.0178719	0.296699
BRADI_4g17230v3	0.621815	7.54152	5.60355	0.0179241	0.296813
BRADI_4g23699v3	-0.663805	1.79905	5.60269	0.0179329	0.296813
BRADI_5g05158v3	0.443878	3.8479	5.60207	0.0179393	0.296813
BRADI_2g15560v3	-0.596506	1.90243	5.60168	0.0179433	0.296813
BRADI_1g71590v3	-0.418868	3.32176	5.58798	0.0180841	0.298875
BRADI_4g12975v3	1.2163	0.00335661	5.58515	0.0181133	0.299089
BRADI_4g27740v3	0.367135	5.78237	5.58047	0.0181619	0.299403
BRADI_5g18810v3	-0.363321	3.92413	5.58018	0.0181649	0.299403
BRADI_2g06460v3	0.665005	2.17968	5.57032	0.0182674	0.299989
BRADI_4g09920v3	0.33426	7.70048	5.56974	0.0182734	0.299989
BRADI_3g51260v3	-0.438809	3.47415	5.5678	0.0182938	0.299989
BRADI_2g33030v3	0.399646	4.0009	5.56624	0.0183101	0.299989
BRADI_2g34700v3	-0.365622	4.1962	5.56386	0.0183349	0.299989
BRADI_1g02440v3	-0.388962	5.57637	5.56304	0.0183435	0.299989
BRADI_2g57800v3	-0.954889	3.64061	5.56246	0.0183496	0.299989
BRADI_1g15290v3	0.303276	13.3671	5.56209	0.0183535	0.299989
BRADI_2g09200v3	0.47474	7.08085	5.55956	0.01838	0.299989
BRADI_2g60765v3	0.756699	1.02927	5.55927	0.0183831	0.299989
BRADI_3g40400v3	0.300295	5.48392	5.55787	0.0183978	0.299989
BRADI_2g49520v3	0.549324	4.06928	5.55775	0.018399	0.299989
BRADI_5g11290v3	0.345118	4.94093	5.5565	0.0184122	0.299989
BRADI_2g41170v3	-1.20338	-0.132171	5.5492	0.0184892	0.300779
BRADI_2g38857v3	-1.59396	0.448438	5.54866	0.0184949	0.300779
BRADI_3g15760v3	-2.75943	-0.326308	5.54725	0.0185098	0.300779
BRADI_2g60150v3	-0.289351	6.42665	5.54232	0.018562	0.301025
BRADI_3g60330v3	-0.329611	4.73383	5.54202	0.0185651	0.301025
BRADI_1g30180v3	0.448081	4.07601	5.54018	0.0185847	0.301025
BRADI_1g37112v3	-0.680959	3.64289	5.53864	0.018601	0.301025
BRADI_2g03170v3	0.28284	8.76857	5.53812	0.0186066	0.301025
BRADI_3g58915v3	1.01333	2.65937	5.52701	0.018725	0.302675
BRADI_2g41630v3	0.295421	7.23377	5.52296	0.0187685	0.303111
BRADI_1g76217v3	-0.956565	0.642044	5.50509	0.0189613	0.305803
BRADI_4g23172v3	-0.883168	0.975184	5.50442	0.0189684	0.305803
BRADI_3g06450v3	0.401508	4.27216	5.49777	0.0190407	0.3067
BRADI_4g41940v3	-0.413584	3.66777	5.49375	0.0190846	0.307138
BRADI_5g13570v3	0.30608	7.37659	5.49073	0.0191176	0.3074
BRADI_4g40710v3	0.286573	7.43928	5.47706	0.0192677	0.308876
BRADI_2g16940v3	-0.434484	3.41618	5.47695	0.0192689	0.308876
BRADI_3g01028v3	0.474665	3.89668	5.47523	0.0192879	0.308876
BRADI_1g50040v3	0.316916	6.2154	5.47445	0.0192964	0.308876
BRADI_2g49900v3	-0.46488	4.23084	5.4735	0.0193069	0.308876
BRADI_4g25826v3	-0.804683	0.927595	5.47322	0.01931	0.308876
BRADI_2g03740v3	-0.279097	6.36667	5.47091	0.0193356	0.309017
BRADI_4g06017v3	0.317508	6.02553	5.466	0.01939	0.309552
BRADI_2g36580v3	0.610932	2.66417	5.46383	0.0194141	0.309552
BRADI_4g43390v3	-0.316958	4.904	5.46334	0.0194195	0.309552
BRADI_1g64540v3	0.276455	7.48615	5.46132	0.019442	0.309642
BRADI_1g52170v3	0.291358	6.5243	5.4587	0.0194712	0.309839
BRADI_2g62360v3	0.457959	4.62697	5.45657	0.0194949	0.309948
BRADI_3g35900v3	0.357898	4.263	5.45331	0.0195313	0.310259
BRADI_2g01497v3	1.14123	0.647499	5.45163	0.0195501	0.31029
BRADI_2g50590v3	-0.385399	4.35697	5.4412	0.0196671	0.311879
BRADI_3g34910v3	-0.382342	3.83663	5.43636	0.0197218	0.312476
BRADI_4g42760v3	-1.03303	0.363675	5.42908	0.0198041	0.312791
BRADI_5g18490v3	-0.546121	5.83199	5.4269	0.0198289	0.312791
BRADI_1g45790v3	0.554953	2.5607	5.42657	0.0198326	0.312791
BRADI_4g27050v3	0.395647	7.0803	5.42342	0.0198685	0.312791
BRADI_2g41480v3	-0.275171	7.33992	5.42166	0.0198884	0.312791
BRADI_1g67530v3	-0.414053	4.59668	5.42034	0.0199035	0.312791
BRADI_2g31810v3	0.274093	6.45555	5.4202	0.0199051	0.312791
BRADI_3g06175v3	-1.1685	1.22516	5.42018	0.0199053	0.312791
BRADI_1g16500v3	0.339094	5.42466	5.41885	0.0199204	0.312791
BRADI_5g16870v3	1.0479	1.57829	5.41874	0.0199218	0.312791
BRADI_3g57820v3	0.281959	7.26146	5.41815	0.0199285	0.312791
BRADI_2g50973v3	0.703331	1.52663	5.41377	0.0199785	0.313309
BRADI_1g34441v3	-0.871536	0.770873	5.40676	0.0200589	0.314148
BRADI_1g17764v3	0.378186	4.30921	5.40472	0.0200824	0.314148
BRADI_4g28660v3	0.286977	6.55588	5.40465	0.0200832	0.314148
BRADI_2g34280v3	0.795723	2.26797	5.40233	0.0201098	0.314297
BRADI_5g16200v3	0.304384	6.02232	5.39997	0.0201371	0.314403
BRADI_5g20557v3	-1.13577	0.935972	5.39731	0.0201678	0.314403
BRADI_2g56537v3	0.414998	3.82698	5.39563	0.0201873	0.314403
BRADI_3g02786v3	0.358918	5.1548	5.39454	0.0201998	0.314403
BRADI_2g02160v3	-0.411965	4.01903	5.39289	0.020219	0.314403
BRADI_1g45370v3	-0.681914	1.79072	5.39288	0.020219	0.314403
BRADI_1g35790v3	-0.390097	4.12214	5.39113	0.0202394	0.314453
BRADI_2g15872v3	0.412972	4.01644	5.3855	0.0203048	0.315203
BRADI_3g52011v3	0.582687	2.95881	5.38002	0.0203686	0.315763
BRADI_2g40441v3	0.622033	3.49394	5.37946	0.0203751	0.315763
BRADI_1g10560v3	1.58174	4.22618	5.37415	0.0204373	0.316259
BRADI_1g59210v3	-0.660619	2.70404	5.37379	0.0204415	0.316259
BRADI_3g34077v3	0.503477	5.24609	5.36644	0.0205278	0.317328
BRADI_5g01725v3	0.573492	2.9189	5.36394	0.0205573	0.317518
BRADI_5g23570v3	0.443109	5.80081	5.36164	0.0205845	0.317522
BRADI_1g60110v3	-0.392313	4.46755	5.36092	0.0205929	0.317522
BRADI_4g35760v3	0.402026	4.74985	5.35953	0.0206094	0.317522
BRADI_2g41020v3	0.659988	2.43843	5.35704	0.0206388	0.317545
BRADI_4g35860v3	0.676018	2.08138	5.35575	0.0206541	0.317545
BRADI_3g60027v3	1.17052	3.80771	5.35503	0.0206626	0.317545
BRADI_4g37608v3	0.427469	6.12281	5.3501	0.0207211	0.318179
BRADI_1g19785v3	0.824862	2.09163	5.34798	0.0207463	0.318231
BRADI_4g20690v3	-0.935549	1.14632	5.34691	0.0207591	0.318231
BRADI_2g51150v3	0.484664	3.96642	5.33984	0.0208433	0.319101
BRADI_4g03230v3	-0.287235	7.59205	5.33925	0.0208505	0.319101
BRADI_1g31816v3	0.3933	4.19472	5.33648	0.0208836	0.319342
BRADI_4g30670v3	0.72108	1.96695	5.32949	0.0209676	0.32036
BRADI_3g15420v3	0.405247	3.80692	5.32639	0.0210049	0.320664
ENSRNA049998198	1.38352	3.31072	5.32136	0.0210656	0.321325
BRADI_5g26410v3	-0.43098	5.77669	5.31843	0.021101	0.321598
BRADI_3g27647v3	-0.491165	2.88368	5.30166	0.0213051	0.324138
BRADI_3g06090v3	-0.721932	1.63208	5.30092	0.0213141	0.324138
BRADI_3g25592v3	0.356989	5.65353	5.3004	0.0213205	0.324138
BRADI_4g40090v3	0.53833	3.08179	5.29416	0.021397	0.324942
BRADI_2g22550v3	-0.550104	3.0734	5.29196	0.0214241	0.324942
BRADI_2g08465v3	1.2158	-0.145606	5.29178	0.0214263	0.324942
BRADI_1g33420v3	0.349666	4.78533	5.28652	0.0214911	0.325179
BRADI_2g12727v3	0.298081	7.50285	5.28489	0.0215113	0.325179
BRADI_3g33534v3	-0.768035	1.07886	5.28276	0.0215375	0.325179
BRADI_3g46030v3	-1.86504	5.16531	5.28027	0.0215684	0.325179
BRADI_1g36430v3	0.451815	6.02296	5.27881	0.0215865	0.325179
BRADI_2g11100v3	-0.344609	6.37227	5.27871	0.0215877	0.325179
BRADI_2g59330v3	-0.567576	2.30968	5.27865	0.0215885	0.325179
BRADI_2g24440v3	-0.318868	5.17506	5.27785	0.0215984	0.325179
BRADI_1g26457v3	-0.396527	3.8895	5.27765	0.0216009	0.325179
BRADI_1g56820v3	0.78591	2.48785	5.2671	0.0217322	0.326857
BRADI_1g50120v3	-1.70022	3.63364	5.26436	0.0217665	0.326857
BRADI_1g69057v3	-0.64872	1.47582	5.2641	0.0217696	0.326857
BRADI_3g28450v3	1.12894	3.09903	5.26218	0.0217937	0.326857
BRADI_2g21180v3	-0.595467	2.1934	5.26159	0.0218011	0.326857
BRADI_2g44750v3	0.595931	3.38868	5.25892	0.0218345	0.327091
BRADI_2g39740v3	0.338081	7.657	5.25583	0.0218733	0.327264
BRADI_3g05000v3	-0.985268	0.451226	5.25517	0.0218816	0.327264
BRADI_2g55697v3	0.768766	1.72333	5.25207	0.0219206	0.327451
BRADI_4g33377v3	0.354413	4.96728	5.2447	0.0220138	0.327451
BRADI_3g38770v3	-0.539363	3.24185	5.24287	0.022037	0.327451
BRADI_2g14990v3	0.740675	1.96688	5.24228	0.0220443	0.327451
BRADI_4g12210v3	0.341748	4.27548	5.24214	0.0220462	0.327451
BRADI_3g60830v3	0.354712	4.66032	5.24094	0.0220613	0.327451
BRADI_1g05520v3	-0.482063	2.83599	5.24064	0.0220651	0.327451
BRADI_2g43900v3	0.521643	5.63387	5.23979	0.022076	0.327451
BRADI_5g00460v3	-0.657483	1.75788	5.23945	0.0220803	0.327451
BRADI_2g52590v3	-0.561519	4.06768	5.23705	0.0221108	0.327451
BRADI_1g46255v3	0.352263	4.35589	5.23578	0.0221269	0.327451
BRADI_4g45200v3	-0.681394	1.79032	5.23288	0.0221638	0.327451
BRADI_1g70000v3	0.402709	4.90157	5.2327	0.0221661	0.327451
BRADI_1g75610v3	-0.431584	3.78111	5.23264	0.0221668	0.327451
BRADI_2g24130v3	-0.829021	0.745261	5.23098	0.022188	0.327451
BRADI_4g43318v3	0.769056	1.98674	5.23042	0.0221951	0.327451
BRADI_1g43196v3	0.549124	2.48189	5.22983	0.0222027	0.327451
BRADI_2g62760v3	-0.279684	6.25074	5.22893	0.0222142	0.327451
BRADI_3g06430v3	-0.974273	0.787271	5.2264	0.0222465	0.327665
BRADI_1g18900v3	0.395513	3.99416	5.22295	0.0222908	0.328054
BRADI_3g11170v3	0.462067	3.35405	5.2212	0.0223132	0.328122
BRADI_1g22250v3	0.329606	5.23848	5.20938	0.0224654	0.330096
BRADI_2g47210v3	-1.14647	1.90725	5.20417	0.0225328	0.330822
BRADI_5g20900v3	0.397582	5.51088	5.20277	0.022551	0.330825
BRADI_3g57220v3	0.292535	7.6309	5.19901	0.0225998	0.331277
BRADI_4g42230v3	0.579718	2.67558	5.19641	0.0226336	0.33151
BRADI_1g36750v3	1.09927	0.660766	5.19409	0.0226638	0.331688
BRADI_3g57470v3	-0.353025	5.50898	5.19113	0.0227025	0.33199
BRADI_1g33650v3	-0.845958	3.25149	5.18785	0.0227453	0.332353
BRADI_2g18160v3	1.0307	0.22251	5.18561	0.0227747	0.33239
BRADI_5g07855v3	-0.380204	3.8722	5.18376	0.022799	0.33239
BRADI_1g18040v3	0.426266	3.46815	5.18352	0.0228021	0.33239
BRADI_4g27337v3	-1.17859	-0.0567663	5.1807	0.0228391	0.332666
BRADI_3g42037v3	-0.85725	1.19648	5.17933	0.0228571	0.332666
BRADI_2g17192v3	1.09733	1.87521	5.17675	0.022891	0.332897
BRADI_2g09202v3	0.782973	2.47819	5.1744	0.0229221	0.333086
BRADI_1g77335v3	1.13436	0.803619	5.16975	0.0229836	0.333715
BRADI_5g19820v3	-0.362119	4.17858	5.16115	0.0230976	0.334962
BRADI_3g18590v3	1.05101	8.81354	5.1599	0.0231142	0.334962
BRADI_2g04550v3	0.817563	0.841475	5.15779	0.0231424	0.334962
BRADI_4g07902v3	-0.349316	4.09518	5.15639	0.0231611	0.334962
BRADI_1g63050v3	0.299917	4.81455	5.15439	0.0231877	0.334962
BRADI_3g05840v3	-0.709816	1.41563	5.15417	0.0231907	0.334962
BRADI_3g20660v3	0.268674	7.84322	5.15274	0.0232097	0.334962
BRADI_5g09320v3	0.568164	3.26652	5.15235	0.023215	0.334962
BRADI_4g32870v3	-0.31698	5.09714	5.15016	0.0232442	0.335121
BRADI_1g42550v3	0.699024	2.49004	5.14606	0.0232991	0.33565
BRADI_4g15425v3	-1.04424	0.308098	5.14051	0.0233738	0.336462
BRADI_2g24450v3	0.357227	6.38032	5.1358	0.0234373	0.336985
BRADI_1g50620v3	0.373401	4.36764	5.13397	0.023462	0.336985
BRADI_1g67830v3	0.41061	4.0795	5.13374	0.023465	0.336985
BRADI_1g07495v3	-1.49287	2.598	5.13105	0.0235015	0.336996
BRADI_2g11080v3	1.18701	3.32	5.13098	0.0235024	0.336996
BRADI_2g05410v3	-0.863385	0.963206	5.12798	0.0235431	0.337317
BRADI_1g35477v3	1.11913	3.79175	5.12612	0.0235683	0.337415
BRADI_1g30740v3	-0.357496	7.47623	5.12303	0.0236103	0.337753
BRADI_4g07440v3	0.258267	6.91252	5.12169	0.0236286	0.337753
BRADI_5g23166v3	-0.851636	1.31321	5.11816	0.0236767	0.338093
BRADI_5g12960v3	-0.711938	3.3003	5.1139	0.0237349	0.338093
BRADI_3g53280v3	-0.325686	4.88402	5.1134	0.0237418	0.338093
BRADI_3g30106v3	-1.19065	0.1885	5.11246	0.0237546	0.338093
BRADI_1g28525v3	0.762329	5.19228	5.11211	0.0237594	0.338093
BRADI_4g34420v3	0.774459	5.73373	5.11163	0.023766	0.338093
BRADI_4g22180v3	0.346676	8.88054	5.11024	0.023785	0.338093
BRADI_1g24490v3	-0.739435	1.43331	5.10893	0.023803	0.338093
BRADI_4g30320v3	-0.321858	4.6316	5.10786	0.0238176	0.338093
BRADI_3g01770v3	0.554079	2.77608	5.1048	0.0238598	0.338132
BRADI_5g03761v3	-0.717724	1.36903	5.10405	0.02387	0.338132
BRADI_1g56580v3	0.2727	13.0197	5.10366	0.0238755	0.338132
BRADI_3g46820v3	0.465205	4.03148	5.10043	0.0239198	0.3385
BRADI_2g39190v3	0.394205	5.50971	5.09488	0.0239966	0.339181
BRADI_1g03620v3	-0.472071	3.41035	5.09334	0.0240179	0.339181
BRADI_4g45220v3	0.349302	4.24209	5.09178	0.0240395	0.339181
BRADI_1g31270v3	0.324788	4.38856	5.09162	0.0240417	0.339181
BRADI_4g39470v3	0.326342	8.1962	5.08859	0.0240837	0.339514
BRADI_2g37400v3	0.29524	7.6039	5.08304	0.0241609	0.340342
BRADI_3g18070v3	-2.56189	0.987433	5.08116	0.0241871	0.34045
BRADI_5g18060v3	0.276346	6.44484	5.07697	0.0242457	0.341014
BRADI_4g14710v3	-0.720448	2.35048	5.07178	0.0243183	0.34169
BRADI_4g45037v3	0.562928	5.59032	5.07022	0.0243403	0.34169
BRADI_3g03620v3	-0.334655	5.08444	5.06949	0.0243506	0.34169
BRADI_4g39110v3	0.386099	6.22072	5.06709	0.0243843	0.34169
BRADI_2g02860v3	-0.693013	1.21807	5.06693	0.0243866	0.34169
BRADI_3g00590v3	0.780719	0.854651	5.06396	0.0244283	0.342015
BRADI_4g10290v3	-0.822266	2.10779	5.05918	0.0244958	0.342699
BRADI_1g71300v3	-0.393974	3.57046	5.05459	0.0245608	0.343184
BRADI_5g07360v3	0.266624	9.077	5.0541	0.0245677	0.343184
BRADI_4g28345v3	0.788021	2.14231	5.04926	0.0246364	0.343349
BRADI_2g05050v3	0.31627	6.87855	5.04884	0.0246424	0.343349
BRADI_2g61410v3	0.263874	7.22721	5.04782	0.0246569	0.343349
BRADI_1g52551v3	0.50681	4.86714	5.0469	0.0246701	0.343349
BRADI_2g23720v3	-0.347026	5.05791	5.04671	0.0246728	0.343349
BRADI_3g08660v3	-0.324944	5.76127	5.04282	0.0247282	0.34386
BRADI_2g26987v3	-0.531992	2.6362	5.03736	0.0248063	0.344428
BRADI_1g00678v3	-0.431845	3.03469	5.03735	0.0248064	0.344428
BRADI_1g72790v3	0.287756	9.40295	5.03578	0.0248289	0.34448
BRADI_3g22461v3	0.432005	3.15184	5.03324	0.0248653	0.344725
BRADI_5g22162v3	-0.607357	2.05449	5.02714	0.024953	0.344839
BRADI_1g47160v3	-0.888047	0.977432	5.02682	0.0249577	0.344839
BRADI_3g30160v3	0.662678	11.0725	5.02653	0.0249618	0.344839
BRADI_4g04655v3	-0.857354	0.58225	5.02631	0.024965	0.344839
BRADI_3g49687v3	-0.490841	2.94805	5.02616	0.0249672	0.344839
BRADI_4g29796v3	1.2985	0.051027	5.02251	0.0250198	0.345022
BRADI_4g06040v3	0.361569	5.75756	5.02238	0.0250218	0.345022
BRADI_2g36817v3	-0.510331	2.854	5.02135	0.0250366	0.345022
BRADI_2g16350v3	0.48654	4.49095	5.01978	0.0250594	0.345077
BRADI_2g58950v3	-0.409582	4.08941	5.01675	0.0251033	0.345409
BRADI_1g35730v3	-0.381773	3.68195	5.01421	0.0251401	0.345409
BRADI_1g27120v3	-0.46142	3.25525	5.01237	0.0251669	0.345409
BRADI_1g70420v3	0.41844	4.85139	5.00957	0.0252076	0.345409
BRADI_1g31370v3	0.317226	5.17042	5.00908	0.0252146	0.345409
BRADI_2g23740v3	-0.706269	5.38937	5.00752	0.0252375	0.345409
BRADI_1g73970v3	0.890676	5.08386	5.00645	0.025253	0.345409
BRADI_1g43410v3	0.483292	4.81553	5.00632	0.0252549	0.345409
BRADI_4g40960v3	0.267859	6.357	5.00324	0.0253	0.345409
BRADI_3g05410v3	-1.13379	4.40573	5.00276	0.0253069	0.345409
BRADI_5g10690v3	1.02222	1.44386	5.00235	0.025313	0.345409
BRADI_1g27450v3	0.272047	6.88465	5.00191	0.0253194	0.345409
BRADI_2g04480v3	-0.280988	7.10067	5.00136	0.0253274	0.345409
BRADI_2g00381v3	-0.765113	6.02198	4.99962	0.0253528	0.345479
BRADI_1g63630v3	-0.3682	6.34272	4.99681	0.025394	0.345479
BRADI_3g41282v3	0.457614	4.37005	4.99619	0.0254032	0.345479
ENSRNA049998256	1.39699	0.792255	4.99589	0.0254075	0.345479
BRADI_2g50830v3	0.32564	4.58191	4.99195	0.0254654	0.34601
BRADI_1g11680v3	1.02176	7.85862	4.98993	0.0254952	0.34616
BRADI_3g19875v3	-0.395895	4.53449	4.98623	0.0255498	0.346645
BRADI_1g05240v3	0.325567	6.18974	4.98368	0.0255875	0.346901
BRADI_4g25510v3	0.275679	7.05238	4.98146	0.0256203	0.34709
BRADI_2g28441v3	0.399564	3.86091	4.97304	0.0257453	0.348527
BRADI_4g27570v3	-0.343367	6.76232	4.9677	0.025825	0.349349
BRADI_1g68380v3	0.526403	2.76692	4.96403	0.0258798	0.349833
BRADI_2g07272v3	0.358007	3.60511	4.95575	0.0260041	0.351256
BRADI_1g04980v3	-0.302339	4.68992	4.95373	0.0260344	0.351375
BRADI_3g30820v3	0.48735	2.60317	4.95229	0.0260562	0.351375
BRADI_1g10960v3	0.312405	7.18914	4.95136	0.0260702	0.351375
BRADI_1g38280v3	0.374411	6.06114	4.94888	0.0261076	0.351622
BRADI_3g13700v3	-1.12744	0.595354	4.94721	0.0261328	0.351704
BRADI_1g64470v3	0.620722	1.55852	4.94394	0.0261822	0.351925
BRADI_4g40616v3	0.353832	4.16532	4.93935	0.0262519	0.351925
BRADI_5g26670v3	0.309987	5.46042	4.9389	0.0262588	0.351925
BRADI_3g27000v3	0.690705	1.9768	4.93785	0.0262747	0.351925
BRADI_2g58160v3	0.345517	5.0517	4.93689	0.0262893	0.351925
BRADI_2g58360v3	0.294049	7.07555	4.93668	0.0262924	0.351925
BRADI_2g21880v3	0.430041	4.65017	4.93571	0.0263072	0.351925
BRADI_2g18455v3	0.541058	2.17338	4.9353	0.0263135	0.351925
BRADI_3g36797v3	1.00946	0.321582	4.9347	0.0263227	0.351925
BRADI_1g67730v3	-0.581645	4.82554	4.93353	0.0263404	0.351925
BRADI_1g68160v3	0.381352	5.87611	4.93108	0.0263778	0.352169
BRADI_1g12010v3	0.970318	3.14993	4.92819	0.0264219	0.352503
BRADI_4g05950v3	-0.321855	4.69613	4.92313	0.0264994	0.353125
BRADI_4g21273v3	-1.02643	0.582307	4.92265	0.0265069	0.353125
BRADI_5g10060v3	-0.39039	3.97425	4.91994	0.0265484	0.353422
BRADI_1g36250v3	-0.325068	5.23584	4.91465	0.0266299	0.354206
BRADI_5g09097v3	-0.462567	3.03048	4.91362	0.0266457	0.354206
BRADI_2g05730v3	1.06962	0.923982	4.90678	0.0267514	0.355314
BRADI_1g27170v3	-0.268064	7.05575	4.90482	0.0267818	0.355314
BRADI_1g63850v3	0.37106	4.25109	4.90364	0.0268002	0.355314
BRADI_2g57440v3	0.56912	4.75194	4.90324	0.0268063	0.355314
BRADI_4g30000v3	0.250562	7.49171	4.90162	0.0268316	0.355318
BRADI_3g20720v3	0.654932	4.82116	4.90074	0.0268452	0.355318
BRADI_3g52350v3	0.295762	6.36515	4.89554	0.0269262	0.356134
BRADI_2g25777v3	-0.382628	4.53706	4.89324	0.026962	0.356349
BRADI_2g07330v3	0.425114	4.27992	4.88987	0.0270147	0.356349
BRADI_2g13750v3	-0.37386	3.38178	4.88983	0.0270154	0.356349
ENSRNA049998194	1.08948	5.46689	4.88954	0.0270199	0.356349
BRADI_3g55560v3	0.358663	8.91225	4.8871	0.0270581	0.356528
BRADI_4g28336v3	-0.855971	1.22688	4.88577	0.027079	0.356528
BRADI_1g60680v3	2.35991	0.573014	4.88387	0.0271088	0.356528
BRADI_2g20570v3	0.511607	3.7579	4.88373	0.0271109	0.356528
BRADI_3g32480v3	-0.293999	4.66563	4.88085	0.0271562	0.356869
BRADI_3g10530v3	0.305335	9.6086	4.87812	0.0271993	0.357179
BRADI_1g64020v3	-0.344492	5.5555	4.87342	0.0272734	0.357898
BRADI_5g06377v3	-0.341545	5.66784	4.87046	0.0273203	0.358257
BRADI_2g55630v3	-0.733294	3.62501	4.86428	0.0274183	0.359287
BRADI_4g38980v3	0.387283	5.54611	4.86179	0.0274578	0.359549
BRADI_1g45535v3	-0.406508	5.0559	4.8516	0.0276206	0.361423
BRADI_2g16140v3	0.602994	3.16105	4.84945	0.0276549	0.361616
BRADI_1g43830v3	-0.261916	6.38415	4.84496	0.027727	0.361945
BRADI_2g57476v3	-0.428837	4.18603	4.84477	0.0277302	0.361945
BRADI_3g17287v3	-0.719382	2.55594	4.84325	0.0277546	0.361945
BRADI_3g46130v3	0.300913	4.92831	4.84299	0.0277587	0.361945
BRADI_5g24027v3	-0.300395	9.77331	4.8367	0.0278602	0.36301
BRADI_4g10165v3	-0.594656	1.70063	4.83458	0.0278945	0.3632
BRADI_4g43280v3	0.280159	6.78542	4.82894	0.0279858	0.364132
BRADI_1g21560v3	-0.415012	2.94336	4.82738	0.0280111	0.364204
BRADI_2g53960v3	0.428905	8.35757	4.82523	0.0280461	0.364402
BRADI_3g39590v3	-0.259211	8.54342	4.82202	0.0280985	0.364824
BRADI_2g32950v3	0.600835	3.05607	4.82029	0.0281267	0.364933
BRADI_3g55830v3	-0.273414	6.28921	4.81712	0.0281784	0.365169
BRADI_1g49107v3	0.291003	4.72283	4.81483	0.0282158	0.365169
BRADI_4g09817v3	0.465924	2.66872	4.8146	0.0282196	0.365169
BRADI_3g48480v3	0.266931	7.32783	4.81432	0.0282242	0.365169
ENSRNA049998200	1.18667	5.17314	4.81021	0.0282916	0.365784
BRADI_5g07365v3	0.815092	2.02015	4.80308	0.0284089	0.367043
BRADI_3g46040v3	-1.80285	2.39501	4.79999	0.0284599	0.367056
BRADI_3g15730v3	0.604355	2.65379	4.79968	0.0284651	0.367056
BRADI_1g75262v3	0.32552	4.55038	4.79939	0.0284697	0.367056
BRADI_3g46210v3	-0.330898	4.22631	4.79672	0.028514	0.367247
BRADI_1g62755v3	-0.751136	1.97714	4.79468	0.0285477	0.367247
BRADI_2g60940v3	0.456629	5.105	4.7931	0.0285739	0.367247
BRADI_5g23890v3	0.29544	8.32598	4.79191	0.0285937	0.367247
BRADI_3g26730v3	-0.287889	4.85298	4.79136	0.0286028	0.367247
BRADI_4g45210v3	-0.579237	3.27286	4.79099	0.0286089	0.367247
BRADI_1g19332v3	0.348818	4.6948	4.78838	0.0286523	0.367247
BRADI_2g09900v3	-0.554701	2.63971	4.7882	0.0286554	0.367247
BRADI_1g10840v3	0.528817	2.89192	4.78768	0.0286641	0.367247
BRADI_2g56370v3	0.65391	1.61383	4.7864	0.0286854	0.367265
BRADI_3g22010v3	-0.383088	3.62269	4.7835	0.0287336	0.367446
BRADI_2g60340v3	-1.62784	6.16809	4.78227	0.0287541	0.367446
BRADI_4g20030v3	-0.777593	1.40474	4.78196	0.0287594	0.367446
BRADI_5g26190v3	0.378051	4.89606	4.77663	0.0288486	0.367702
BRADI_4g41790v3	-0.290449	5.35948	4.7765	0.0288507	0.367702
BRADI_3g56450v3	0.270936	6.80906	4.77571	0.0288639	0.367702
BRADI_2g54340v3	-0.851835	4.84278	4.77507	0.0288747	0.367702
BRADI_3g59120v3	0.525235	3.49185	4.77479	0.0288793	0.367702
BRADI_2g16670v3	-0.275425	6.69669	4.77304	0.0289087	0.367822
BRADI_4g37620v3	0.414691	4.95359	4.77037	0.0289535	0.368138
BRADI_1g67090v3	-0.317431	4.37688	4.76875	0.0289809	0.368232
BRADI_2g46140v3	-0.665978	1.97852	4.76271	0.0290827	0.369024
BRADI_1g22890v3	0.457359	2.92825	4.76267	0.0290833	0.369024
BRADI_1g14760v3	0.370008	6.18641	4.75859	0.0291524	0.369635
BRADI_3g06940v3	-0.371334	3.62096	4.75746	0.0291716	0.369635
BRADI_5g22590v3	1.15349	0.394593	4.75444	0.0292228	0.370028
BRADI_4g29720v3	1.53471	5.35684	4.75163	0.0292706	0.370379
BRADI_5g11840v3	0.39952	5.96598	4.74584	0.0293692	0.371284
BRADI_3g26498v3	0.739838	1.12882	4.74506	0.0293825	0.371284
BRADI_1g68887v3	-0.808508	1.34117	4.74228	0.0294301	0.371525
BRADI_3g29080v3	-0.578393	2.18405	4.74159	0.0294419	0.371525
BRADI_1g33330v3	-0.259332	6.97762	4.7403	0.0294639	0.371548
BRADI_3g40850v3	0.850195	1.74194	4.736	0.0295376	0.37204
BRADI_3g14040v3	-0.483442	4.4964	4.73535	0.0295489	0.37204
BRADI_1g31570v3	-0.321793	5.25639	4.73409	0.0295705	0.37204
BRADI_1g24147v3	0.33231	4.74137	4.73332	0.0295838	0.37204
BRADI_3g10030v3	-0.799345	3.26615	4.73054	0.0296316	0.372305
BRADI_1g73700v3	0.315974	4.39431	4.72901	0.029658	0.372305
BRADI_4g37530v3	-1.13302	-0.0828114	4.72857	0.0296655	0.372305
BRADI_2g32220v3	-0.422862	4.17452	4.7264	0.029703	0.37234
BRADI_2g45850v3	0.675185	2.04269	4.72607	0.0297087	0.37234
BRADI_1g38180v3	-0.479418	2.63548	4.72261	0.0297686	0.372836
BRADI_2g04577v3	-0.339626	4.94339	4.71966	0.0298196	0.373053
BRADI_2g34407v3	0.508569	4.96016	4.71927	0.0298264	0.373053
BRADI_3g46140v3	0.320531	5.13444	4.71649	0.0298746	0.373402
BRADI_3g40571v3	-0.828277	0.90453	4.71449	0.0299094	0.373531
BRADI_2g44140v3	0.244596	6.80753	4.71337	0.0299288	0.373531
BRADI_2g27130v3	0.554596	4.77502	4.7124	0.0299458	0.373531
BRADI_3g13027v3	0.820642	4.66565	4.70945	0.0299972	0.373689
BRADI_1g62615v3	-0.355884	4.26078	4.70904	0.0300044	0.373689
BRADI_3g38580v3	0.326288	7.32011	4.70818	0.0300194	0.373689
BRADI_3g57640v3	-0.375905	3.50546	4.69996	0.0301634	0.375003
BRADI_1g50770v3	-0.721758	1.14593	4.69983	0.0301656	0.375003
BRADI_1g65810v3	-0.614453	5.13642	4.69749	0.0302068	0.375256
BRADI_1g74850v3	0.256265	5.99249	4.69635	0.0302268	0.375256
BRADI_2g26170v3	0.294275	5.57867	4.68973	0.0303434	0.37633
BRADI_4g11557v3	0.988778	0.203114	4.6891	0.0303545	0.37633
BRADI_3g24417v3	0.579761	8.00238	4.68797	0.0303746	0.37633
BRADI_2g36020v3	-0.527984	2.18158	4.68435	0.0304385	0.376869
BRADI_2g59310v3	-0.464322	3.39451	4.68144	0.0304902	0.377045
BRADI_1g28960v3	0.318156	6.65129	4.68124	0.0304938	0.377045
BRADI_1g69020v3	0.774091	1.9978	4.67678	0.030573	0.377772
BRADI_1g04280v3	-0.853759	0.673296	4.67083	0.0306792	0.378829
BRADI_1g23510v3	0.362334	5.09286	4.66797	0.0307302	0.378915
BRADI_3g18051v3	0.335365	5.46228	4.6679	0.0307316	0.378915
BRADI_5g15167v3	0.53053	2.66103	4.66618	0.0307623	0.378915
BRADI_3g03770v3	0.33323	7.0034	4.66583	0.0307685	0.378915
BRADI_4g36200v3	0.293627	5.76031	4.66093	0.0308564	0.379574
BRADI_4g13940v3	0.326457	5.14548	4.66056	0.0308632	0.379574
BRADI_2g34580v3	0.264476	9.79347	4.65686	0.0309298	0.379934
BRADI_5g24870v3	0.305279	5.75274	4.65664	0.0309337	0.379934
BRADI_3g14530v3	0.319876	5.74795	4.65129	0.0310301	0.380864
BRADI_1g70330v3	0.331182	5.82917	4.64866	0.0310777	0.380979
BRADI_5g18750v3	0.466616	2.90749	4.64766	0.031096	0.380979
BRADI_2g20060v3	-0.590753	2.69134	4.64735	0.0311016	0.380979
BRADI_4g37770v3	-0.327579	6.18135	4.64072	0.0312219	0.382198
BRADI_2g58460v3	-0.469776	3.24639	4.63706	0.0312886	0.382508
BRADI_1g57000v3	0.328929	5.95864	4.63636	0.0313012	0.382508
BRADI_1g51250v3	-0.309168	4.36425	4.63094	0.0314004	0.382508
BRADI_1g65157v3	-0.588368	2.67005	4.63049	0.0314087	0.382508
BRADI_3g17400v3	0.625953	2.68371	4.63045	0.0314093	0.382508
BRADI_3g01450v3	0.31796	6.42822	4.62879	0.0314398	0.382508
BRADI_1g29680v3	0.362641	7.89648	4.62705	0.0314716	0.382508
BRADI_4g32090v3	-0.329922	4.83564	4.62654	0.0314809	0.382508
BRADI_3g40096v3	0.797542	1.86331	4.62627	0.031486	0.382508
BRADI_3g11024v3	-0.392444	3.62346	4.62562	0.0314978	0.382508
BRADI_3g44820v3	-0.49497	5.60571	4.62539	0.0315021	0.382508
BRADI_5g01360v3	1.03397	0.747677	4.62504	0.0315085	0.382508
BRADI_5g18200v3	0.560283	2.78361	4.62456	0.0315173	0.382508
BRADI_2g25390v3	-0.289528	7.00343	4.62333	0.0315399	0.38253
BRADI_3g42627v3	0.292518	12.2242	4.62192	0.0315659	0.382594
BRADI_1g02160v3	-0.292258	4.73812	4.61753	0.0316468	0.383322
BRADI_5g13150v3	0.66557	2.49036	4.61493	0.0316948	0.38365
BRADI_1g75087v3	-0.510715	3.32154	4.61147	0.0317588	0.384173
BRADI_2g54010v3	-0.661152	2.52258	4.60559	0.0318679	0.38524
BRADI_3g41130v3	-0.475405	3.48472	4.60171	0.0319402	0.385392
BRADI_3g40190v3	0.248363	7.51827	4.60164	0.0319414	0.385392
BRADI_2g54260v3	-0.462914	2.84234	4.60153	0.0319433	0.385392
BRADI_2g18980v3	-0.620967	2.55478	4.59807	0.0320079	0.385858
BRADI_4g04540v3	-0.338932	4.20516	4.59722	0.0320238	0.385858
ENSRNA049996587	-0.972881	0.327043	4.59147	0.0321315	0.386823
BRADI_4g29740v3	0.378829	4.28724	4.59069	0.032146	0.386823
BRADI_2g14391v3	0.345376	6.46426	4.58252	0.0322997	0.388419
BRADI_1g43900v3	0.981761	1.52263	4.58008	0.0323458	0.388476
ENSRNA049998189	1.06078	5.85774	4.57941	0.0323583	0.388476
BRADI_1g57040v3	0.633034	4.15787	4.57891	0.0323677	0.388476
BRADI_4g08050v3	0.245574	7.13709	4.57347	0.0324707	0.389458
BRADI_1g19550v3	-0.764769	0.94126	4.57106	0.0325164	0.389752
BRADI_1g16620v3	-0.283265	5.60456	4.56705	0.0325926	0.390412
BRADI_1g64140v3	-0.800975	1.28244	4.56356	0.0326592	0.390954
BRADI_2g62370v3	1.49756	3.85397	4.5599	0.032729	0.39138
BRADI_4g39197v3	0.326035	8.16085	4.55934	0.0327396	0.39138
BRADI_2g05824v3	-0.367265	3.75292	4.55728	0.032779	0.39138
BRADI_1g18720v3	0.582707	2.8473	4.55622	0.0327994	0.39138
BRADI_1g24567v3	0.26235	6.58241	4.5546	0.0328304	0.39138
BRADI_1g24590v3	0.378532	5.93567	4.5543	0.0328362	0.39138
BRADI_2g23580v3	-0.31482	4.91175	4.55329	0.0328556	0.39138
BRADI_1g19483v3	-1.25572	-0.0103765	4.55281	0.0328648	0.39138
BRADI_1g56730v3	0.589987	1.76736	4.55001	0.0329185	0.391766
BRADI_1g58350v3	0.250736	11.8216	4.54775	0.0329621	0.391974
BRADI_1g09780v3	-0.648333	2.80268	4.54689	0.0329785	0.391974
BRADI_1g45833v3	0.258921	7.58189	4.54556	0.0330042	0.392001
BRADI_2g52600v3	-0.386321	3.60514	4.54295	0.0330545	0.392001
BRADI_1g26880v3	0.241323	7.0123	4.54293	0.0330549	0.392001
BRADI_3g51090v3	-0.412626	5.32477	4.54056	0.0331008	0.392001
BRADI_4g17498v3	0.920218	0.717154	4.5399	0.0331135	0.392001
BRADI_2g37865v3	0.676872	1.76962	4.53986	0.0331144	0.392001
BRADI_4g27117v3	0.29871	6.8967	4.5382	0.0331465	0.392001
BRADI_4g33505v3	0.312788	4.67033	4.53796	0.0331512	0.392001
BRADI_2g22210v3	0.282573	6.27605	4.53536	0.0332014	0.392159
BRADI_2g12001v3	-0.492161	2.53139	4.53507	0.0332071	0.392159
BRADI_2g39960v3	-0.30554	4.57878	4.53324	0.0332426	0.392327
BRADI_1g59226v3	1.2117	-0.0684236	4.52994	0.0333068	0.392832
BRADI_3g10020v3	1.21541	1.02967	4.52819	0.0333408	0.392982
BRADI_2g18170v3	-0.299053	5.88345	4.52665	0.0333709	0.393042
BRADI_1g28860v3	-0.250297	6.76363	4.52574	0.0333886	0.393042
BRADI_3g50420v3	1.30086	3.85381	4.52285	0.0334451	0.393249
BRADI_2g24240v3	-0.844347	1.30936	4.52265	0.0334489	0.393249
BRADI_5g07206v3	-0.952313	0.486774	4.52097	0.0334819	0.393385
BRADI_2g31910v3	0.960209	5.38282	4.51788	0.0335424	0.393845
BRADI_5g23610v3	-0.614744	1.50204	4.51589	0.0335814	0.393938
BRADI_4g02201v3	-0.402156	3.64271	4.5153	0.0335931	0.393938
BRADI_4g13204v3	-0.42869	2.80617	4.51297	0.0336389	0.394084
BRADI_2g25030v3	0.391366	4.84554	4.51078	0.0336819	0.394084
BRADI_1g01610v3	1.88759	2.39649	4.50928	0.0337115	0.394084
BRADI_2g03800v3	0.250223	8.48116	4.50864	0.0337241	0.394084
BRADI_5g02160v3	-0.294542	4.37518	4.50852	0.0337264	0.394084
BRADI_3g35430v3	-0.694458	1.03576	4.50813	0.033734	0.394084
BRADI_3g43766v3	0.623423	2.05243	4.50527	0.0337905	0.394494
BRADI_2g28040v3	0.258603	6.11415	4.50137	0.0338677	0.394512
BRADI_5g10955v3	0.629322	3.07927	4.50119	0.0338712	0.394512
BRADI_2g43410v3	-0.364213	3.48351	4.50099	0.0338752	0.394512
BRADI_2g57952v3	0.347724	4.65653	4.50086	0.0338777	0.394512
BRADI_2g62660v3	-0.412438	2.91888	4.49881	0.0339185	0.394736
BRADI_1g37175v3	0.311102	6.06896	4.49684	0.0339576	0.394943
BRADI_3g59320v3	0.60683	1.71115	4.49506	0.0339928	0.395102
BRADI_5g22961v3	-0.885535	1.36501	4.49359	0.0340221	0.395193
BRADI_2g10880v3	0.504175	6.29602	4.49172	0.0340594	0.39533
ENSRNA049997598	1.28316	1.05817	4.49084	0.0340768	0.39533
BRADI_2g13060v3	0.82972	1.87287	4.48913	0.034111	0.395368
BRADI_3g04381v3	-0.885113	0.599109	4.48853	0.0341231	0.395368
BRADI_2g23070v3	-0.507361	2.6522	4.48165	0.0342606	0.396073
BRADI_3g56440v3	-0.338738	3.5932	4.48056	0.0342825	0.396073
BRADI_4g09125v3	0.272277	14.2115	4.48016	0.0342906	0.396073
BRADI_4g09196v3	-0.489769	2.31451	4.4801	0.0342916	0.396073
BRADI_2g44150v3	-0.845278	0.797879	4.47911	0.0343116	0.396073
BRADI_5g12970v3	-0.624746	1.65889	4.47904	0.034313	0.396073
BRADI_3g14917v3	-0.448115	3.38505	4.47648	0.0343644	0.396418
BRADI_2g14500v3	0.418195	3.90428	4.46843	0.0345268	0.397985
BRADI_4g15750v3	-0.668776	1.44102	4.46684	0.0345589	0.397985
BRADI_2g22400v3	-0.253982	7.20577	4.46653	0.0345651	0.397985
BRADI_4g39987v3	0.262714	6.47057	4.4639	0.0346184	0.398323
BRADI_4g39440v3	-0.74831	1.00093	4.46295	0.0346377	0.398323
BRADI_3g00570v3	-0.50243	2.40425	4.45783	0.0347415	0.399267
BRADI_4g00740v3	-0.250365	7.78341	4.45228	0.0348546	0.400317
BRADI_3g16300v3	-0.744113	1.48287	4.4445	0.0350139	0.401896
BRADI_5g12990v3	-0.497988	2.56622	4.44176	0.0350701	0.40229
BRADI_2g04430v3	0.358144	5.66899	4.43822	0.035143	0.402875
BRADI_1g12000v3	-0.439261	3.83967	4.43646	0.0351791	0.403038
BRADI_4g41137v3	0.852751	2.38701	4.43248	0.0352612	0.403727
BRADI_1g26260v3	-0.896315	2.61094	4.4313	0.0352856	0.403755
BRADI_5g26720v3	0.276012	7.49672	4.42983	0.0353161	0.403854
BRADI_4g04460v3	0.233377	7.4832	4.42605	0.0353944	0.404497
BRADI_5g01936v3	-0.379048	4.47397	4.4189	0.0355429	0.405943
BRADI_4g37555v3	0.31067	6.97189	4.41268	0.0356728	0.407174
BRADI_4g02930v3	-0.278788	5.56066	4.40893	0.0357513	0.40775
BRADI_5g16817v3	-0.350582	5.11212	4.40816	0.0357675	0.40775
BRADI_4g40020v3	0.567531	5.56538	4.4055	0.0358233	0.408133
BRADI_5g01350v3	-0.3336	4.22146	4.40324	0.0358708	0.408421
BRADI_5g08360v3	0.315123	4.74266	4.39854	0.0359697	0.409294
BRADI_3g41090v3	-0.318454	4.2344	4.39445	0.0360561	0.410024
BRADI_2g18447v3	1.24035	1.73863	4.39122	0.0361245	0.41035
BRADI_1g66160v3	-0.462849	3.04533	4.39099	0.0361294	0.41035
BRADI_4g22653v3	-1.407	2.67177	4.37752	0.036416	0.413351
BRADI_1g28620v3	0.52796	2.65062	4.37238	0.036526	0.414261
BRADI_4g01440v3	-1.09382	-0.105532	4.37167	0.0365412	0.414261
BRADI_3g53200v3	-0.31441	4.29399	4.36879	0.036603	0.414707
BRADI_1g26550v3	-1.10126	0.0619059	4.36684	0.0366448	0.414925
BRADI_2g49380v3	-0.368217	3.68302	4.36549	0.0366739	0.414992
BRADI_2g42980v3	-0.324438	4.10462	4.36424	0.0367008	0.414992
BRADI_1g41640v3	0.369594	4.03044	4.36343	0.0367183	0.414992
BRADI_3g46480v3	-0.399567	5.76917	4.3606	0.0367794	0.415427
BRADI_1g71480v3	0.703576	1.02814	4.35861	0.0368224	0.415641
BRADI_2g07110v3	0.335455	5.13271	4.35724	0.0368519	0.415641
BRADI_1g76420v3	-0.503531	3.66861	4.35659	0.0368661	0.415641
BRADI_4g02544v3	-0.69631	1.54912	4.35282	0.0369477	0.416128
BRADI_1g62940v3	0.290409	7.89275	4.35251	0.0369545	0.416128
BRADI_2g14720v3	0.334509	4.84377	4.35126	0.0369816	0.416179
BRADI_4g32830v3	-0.583283	1.92769	4.34928	0.0370247	0.416409
BRADI_2g25850v3	0.345844	4.47841	4.34641	0.037087	0.416855
BRADI_2g37760v3	0.281519	4.983	4.34497	0.0371184	0.416869
BRADI_5g24560v3	0.735402	1.30366	4.34428	0.0371335	0.416869
BRADI_1g31080v3	0.284484	4.45559	4.34042	0.0372178	0.416947
BRADI_1g46970v3	-0.28045	5.40493	4.34032	0.0372199	0.416947
BRADI_1g74350v3	0.335412	5.88941	4.33986	0.0372301	0.416947
BRADI_2g47310v3	0.352598	7.38726	4.33981	0.0372311	0.416947
BRADI_1g04810v3	0.244213	7.4271	4.33778	0.0372755	0.417191
BRADI_2g14510v3	-0.517422	2.85827	4.33475	0.037342	0.417253
BRADI_1g68837v3	0.2956	5.95427	4.33334	0.0373728	0.417253
BRADI_1g63100v3	0.302132	6.90216	4.33302	0.03738	0.417253
BRADI_2g59420v3	-0.304454	5.10185	4.33296	0.0373811	0.417253
BRADI_2g44856v3	0.262027	14.009	4.33236	0.0373944	0.417253
BRADI_1g15850v3	-0.247201	6.30625	4.32997	0.0374468	0.417293
BRADI_4g30330v3	-0.301067	4.67247	4.32967	0.0374534	0.417293
BRADI_4g07527v3	-0.537157	5.84228	4.32889	0.0374707	0.417293
BRADI_2g03680v3	0.26074	7.13458	4.32808	0.0374886	0.417293
BRADI_1g71660v3	-0.324708	3.92221	4.32307	0.037599	0.418269
BRADI_2g14280v3	-0.341944	3.51188	4.32171	0.0376291	0.418351
BRADI_2g38260v3	-0.687479	2.52537	4.32033	0.0376596	0.418437
BRADI_2g45330v3	-0.315106	6.47491	4.31798	0.0377118	0.418622
BRADI_1g11510v3	0.403497	3.55904	4.31737	0.0377252	0.418622
BRADI_2g53550v3	-0.385103	3.49556	4.31364	0.0378079	0.418622
BRADI_2g43980v3	-0.587862	1.7161	4.31241	0.0378352	0.418622
BRADI_3g59167v3	0.333596	3.96814	4.31167	0.0378519	0.418622
BRADI_3g32297v3	0.457637	4.80408	4.30934	0.0379037	0.418622
BRADI_3g16060v3	-0.508199	3.55774	4.30914	0.0379082	0.418622
BRADI_3g36986v3	-0.32053	3.85452	4.30902	0.0379108	0.418622
BRADI_4g11420v3	0.294135	6.69412	4.30828	0.0379273	0.418622
BRADI_1g75990v3	-0.595376	1.90268	4.30676	0.0379611	0.418622
BRADI_1g21190v3	-0.397641	3.52391	4.3064	0.0379692	0.418622
BRADI_5g26725v3	0.341294	7.42783	4.30625	0.0379726	0.418622
BRADI_3g01610v3	-0.326796	4.05236	4.30608	0.0379764	0.418622
BRADI_4g30040v3	0.293231	5.32141	4.3045	0.0380117	0.418622
BRADI_2g35578v3	0.457312	5.9339	4.30333	0.0380379	0.418622
BRADI_4g29619v3	0.611345	1.78312	4.30323	0.0380401	0.418622
BRADI_2g48740v3	-0.529384	4.84005	4.30203	0.038067	0.418669
BRADI_2g26860v3	1.76487	0.323503	4.29709	0.0381776	0.419634
BRADI_2g48570v3	-0.26706	7.56264	4.29041	0.0383279	0.420205
BRADI_3g14790v3	-0.255399	6.37321	4.28982	0.0383412	0.420205
BRADI_4g41765v3	-0.520514	2.49436	4.28976	0.0383425	0.420205
BRADI_2g60750v3	0.361532	3.78119	4.28888	0.0383624	0.420205
BRADI_3g39077v3	0.857541	2.24541	4.28865	0.0383676	0.420205
BRADI_2g17067v3	0.908548	4.78137	4.28719	0.0384007	0.420205
BRADI_4g41430v3	0.31502	5.1442	4.28644	0.0384175	0.420205
BRADI_2g31973v3	0.65888	1.21299	4.28545	0.0384398	0.420205
BRADI_3g54236v3	-0.305138	6.16086	4.2848	0.0384545	0.420205
BRADI_3g28390v3	-0.332874	3.9078	4.28466	0.0384577	0.420205
BRADI_5g13400v3	-0.291245	5.82161	4.28291	0.0384974	0.420209
BRADI_1g78260v3	-1.64426	0.989021	4.28263	0.0385038	0.420209
BRADI_3g58630v3	-0.73578	0.773038	4.27691	0.0386335	0.42125
BRADI_4g16970v3	-0.271414	5.41519	4.27641	0.0386449	0.42125
BRADI_1g62840v3	0.313433	6.43757	4.27319	0.0387182	0.4218
BRADI_4g09963v3	0.741189	1.37948	4.27016	0.0387872	0.422056
BRADI_4g36660v3	-0.672767	1.17692	4.26985	0.0387944	0.422056
BRADI_2g52400v3	0.272941	6.17359	4.26691	0.0388616	0.422056
BRADI_2g62550v3	0.261177	8.68638	4.26671	0.0388662	0.422056
BRADI_1g69840v3	-0.308554	4.29094	4.26622	0.0388773	0.422056
BRADI_1g63190v3	0.300598	5.11741	4.26613	0.0388793	0.422056
BRADI_2g42890v3	-0.601241	2.628	4.2578	0.0390706	0.423882
BRADI_4g01980v3	-0.435072	3.15537	4.25371	0.0391647	0.424271
BRADI_1g57910v3	-0.328945	3.82765	4.2535	0.0391695	0.424271
BRADI_1g38330v3	0.909946	1.94827	4.25324	0.0391755	0.424271
BRADI_1g06200v3	-0.393719	4.29817	4.25056	0.0392374	0.424295
BRADI_3g03380v3	-0.37607	4.18684	4.25009	0.0392482	0.424295
BRADI_1g20460v3	-1.38903	5.1596	4.25005	0.0392491	0.424295
BRADI_4g30070v3	-0.378449	3.39023	4.24915	0.0392699	0.424295
BRADI_1g25837v3	-0.353062	7.53926	4.24701	0.0393194	0.42458
BRADI_3g44370v3	0.279109	5.62137	4.24429	0.0393825	0.42472
BRADI_5g10952v3	0.577245	2.4157	4.24241	0.0394261	0.42472
BRADI_3g53690v3	-0.605883	2.26831	4.24215	0.0394323	0.42472
BRADI_4g25797v3	-0.803	0.551648	4.24214	0.0394323	0.42472
BRADI_1g48050v3	0.42886	6.50459	4.24148	0.0394477	0.42472
BRADI_1g59290v3	-0.893802	1.60078	4.23987	0.0394852	0.424795
BRADI_1g37304v3	-0.53999	2.72691	4.23819	0.0395244	0.424795
BRADI_1g35630v3	-0.232079	6.67426	4.23773	0.0395349	0.424795
BRADI_3g22580v3	0.335856	5.86998	4.23722	0.0395469	0.424795
BRADI_1g25080v3	0.610525	3.25751	4.22798	0.0397628	0.426862
BRADI_2g62067v3	0.588003	3.16576	4.227	0.0397857	0.426862
BRADI_3g19120v3	0.358671	5.15379	4.22515	0.0398291	0.427078
BRADI_1g21850v3	0.367667	4.06933	4.22264	0.039888	0.42746
BRADI_4g07420v3	-0.280633	4.99058	4.22112	0.0399238	0.427596
BRADI_2g04890v3	-0.654973	1.40732	4.2167	0.0400279	0.428462
BRADI_2g00280v3	-0.632677	3.07289	4.21486	0.0400714	0.428665
BRADI_3g28990v3	-0.74177	2.37587	4.21329	0.0401085	0.428665
BRADI_2g07116v3	-0.554521	1.92851	4.21264	0.0401239	0.428665
BRADI_1g72180v3	0.313629	4.19826	4.21196	0.04014	0.428665
BRADI_3g35510v3	-0.342048	5.5104	4.2063	0.0402741	0.42977
BRADI_2g01217v3	0.457747	3.37574	4.20562	0.0402902	0.42977
BRADI_3g46710v3	-1.19296	1.86849	4.20417	0.0403246	0.429888
BRADI_3g57280v3	-0.548041	2.31087	4.20278	0.0403577	0.429991
BRADI_4g03610v3	-0.319989	5.56505	4.2011	0.0403977	0.430169
BRADI_3g40620v3	-0.420543	5.20344	4.19789	0.0404742	0.430568
BRADI_3g15550v3	0.671375	2.16783	4.19736	0.0404871	0.430568
BRADI_2g37780v3	0.324467	5.58439	4.19659	0.0405053	0.430568
BRADI_4g42970v3	-0.277495	5.86708	4.19217	0.0406111	0.431441
BRADI_4g22510v3	0.370317	3.85264	4.1912	0.0406343	0.431441
BRADI_4g26390v3	-0.277542	4.73025	4.18838	0.040702	0.43188
BRADI_4g28680v3	-0.605578	1.45119	4.18752	0.0407226	0.43188
BRADI_4g41060v3	0.285425	6.91585	4.18422	0.040802	0.432473
BRADI_4g40160v3	-0.72749	2.6195	4.18324	0.0408256	0.432475
BRADI_5g16690v3	0.467514	4.07365	4.18145	0.0408687	0.432529
BRADI_1g33347v3	0.546499	6.82044	4.18108	0.0408778	0.432529
BRADI_1g26350v3	0.236275	10.5382	4.17802	0.0409514	0.432838
BRADI_1g60540v3	0.404118	2.89843	4.17682	0.0409805	0.432838
BRADI_3g28498v3	0.672303	1.81811	4.17627	0.0409939	0.432838
BRADI_1g76460v3	-0.536079	3.686	4.17509	0.0410223	0.432838
BRADI_3g48220v3	0.35982	4.57207	4.1747	0.0410319	0.432838
BRADI_4g01950v3	-1.16916	6.57905	4.17403	0.0410481	0.432838
BRADI_3g43290v3	-0.282651	9.87661	4.17258	0.0410832	0.432961
BRADI_5g06628v3	0.734399	1.20269	4.17102	0.0411211	0.433112
BRADI_2g44320v3	-0.30796	4.14733	4.16809	0.0411922	0.433613
BRADI_2g24910v3	-0.263394	6.11925	4.16552	0.0412548	0.434007
BRADI_1g40150v3	-0.303256	4.9453	4.16462	0.0412767	0.434007
BRADI_2g62730v3	0.299311	4.78637	4.16291	0.0413185	0.434145
BRADI_3g01570v3	-0.554293	2.15595	4.1614	0.0413553	0.434145
BRADI_4g33067v3	0.589148	2.58179	4.16118	0.0413606	0.434145
BRADI_1g15520v3	0.294563	5.45978	4.15898	0.0414144	0.43445
BRADI_4g28700v3	-0.834249	1.18263	4.15806	0.0414369	0.43445
BRADI_5g10970v3	0.381179	3.24524	4.15645	0.0414764	0.434617
BRADI_3g00330v3	0.245197	10.1268	4.14877	0.0416647	0.436173
BRADI_1g08490v3	-0.303824	4.4594	4.14764	0.0416925	0.436173
BRADI_1g53105v3	0.642341	1.9519	4.1475	0.041696	0.436173
BRADI_3g33040v3	-0.357836	5.75033	4.14391	0.0417845	0.43659
BRADI_3g35610v3	-0.515772	2.74113	4.14388	0.0417853	0.43659
BRADI_1g05752v3	0.677625	2.46776	4.143	0.041807	0.43659
BRADI_1g66000v3	1.487	1.92334	4.14157	0.0418425	0.436713
BRADI_1g24830v3	0.848802	3.44426	4.13849	0.0419185	0.436793
BRADI_2g61580v3	0.342461	5.51129	4.13825	0.0419245	0.436793
BRADI_4g18730v3	0.284862	6.32867	4.1381	0.0419283	0.436793
BRADI_1g49220v3	-0.711577	0.978903	4.13742	0.041945	0.436793
BRADI_4g12070v3	-0.379791	5.31302	4.13383	0.0420341	0.437426
BRADI_5g23437v3	0.24903	6.43255	4.13306	0.0420533	0.437426
BRADI_2g46937v3	-0.580289	1.82386	4.13105	0.0421032	0.437697
BRADI_1g04950v3	0.313759	6.17708	4.12881	0.0421591	0.437778
BRADI_2g01050v3	1.043	4.82075	4.12752	0.0421912	0.437778
BRADI_5g09041v3	0.781225	0.481916	4.12584	0.0422332	0.437778
BRADI_2g08045v3	0.35712	3.2881	4.12483	0.0422583	0.437778
BRADI_3g22365v3	-0.786524	0.953832	4.12442	0.0422686	0.437778
BRADI_1g09960v3	-0.942953	0.976155	4.12395	0.0422801	0.437778
BRADI_4g39580v3	0.249699	6.22489	4.12367	0.0422872	0.437778
BRADI_1g20860v3	0.348649	6.57294	4.12298	0.0423045	0.437778
BRADI_2g53411v3	-0.502136	3.09664	4.12216	0.0423249	0.437778
BRADI_2g07180v3	-0.310134	4.84842	4.11891	0.0424064	0.438292
BRADI_3g00320v3	0.704255	2.36626	4.11822	0.0424237	0.438292
BRADI_4g19550v3	-0.531137	2.58595	4.11733	0.0424461	0.438292
BRADI_3g52320v3	-0.631564	2.31072	4.11435	0.0425209	0.438512
BRADI_4g30587v3	1.16206	0.18308	4.11375	0.042536	0.438512
BRADI_4g13580v3	1.22152	1.8905	4.11318	0.0425502	0.438512
BRADI_3g47034v3	-0.398689	3.29195	4.11168	0.0425879	0.438512
BRADI_2g15700v3	0.428484	3.50358	4.11076	0.0426113	0.438512
BRADI_1g46750v3	-1.4148	1.4624	4.10991	0.0426327	0.438512
BRADI_2g17140v3	0.308656	5.01585	4.10633	0.0427231	0.438512
BRADI_1g31767v3	-0.541056	1.87046	4.10594	0.0427329	0.438512
BRADI_5g19620v3	-0.816057	1.32217	4.10509	0.0427544	0.438512
BRADI_5g15677v3	-0.869286	1.20376	4.10419	0.042777	0.438512
BRADI_4g43640v3	-0.331361	4.03055	4.10322	0.0428017	0.438512
BRADI_2g51980v3	-0.253995	6.81629	4.10299	0.0428073	0.438512
BRADI_2g47345v3	0.782338	0.919773	4.10276	0.0428133	0.438512
BRADI_1g43090v3	0.990175	0.357544	4.10225	0.0428262	0.438512
BRADI_1g66475v3	-0.610355	1.97757	4.10134	0.0428491	0.438512
BRADI_3g39010v3	2.09031	2.19024	4.10078	0.0428634	0.438512
BRADI_2g02100v3	-0.306361	5.98293	4.10043	0.0428723	0.438512
BRADI_2g31172v3	0.336096	4.23445	4.09821	0.0429287	0.438696
BRADI_4g21790v3	0.383543	3.10661	4.09784	0.0429379	0.438696
BRADI_3g22760v3	0.24181	7.63398	4.09618	0.0429802	0.438885
ENSRNA049996188	0.94958	0.534472	4.09274	0.0430677	0.439534
BRADI_2g51967v3	0.318036	3.94243	4.08952	0.0431498	0.439764
BRADI_2g54067v3	-0.273197	5.04764	4.08919	0.0431583	0.439764
BRADI_1g03277v3	0.388358	3.15477	4.08842	0.0431781	0.439764
BRADI_2g06400v3	-0.304428	4.27996	4.08812	0.0431857	0.439764
BRADI_4g36370v3	-0.295817	7.82112	4.0864	0.0432296	0.439967
BRADI_2g31980v3	0.656869	1.28252	4.08505	0.0432641	0.440075
BRADI_1g07660v3	-1.5417	5.53383	4.07848	0.0434326	0.441234
BRADI_4g31851v3	-0.852478	0.918262	4.07786	0.0434486	0.441234
BRADI_2g01157v3	-0.535563	2.1866	4.07735	0.0434618	0.441234
BRADI_4g18361v3	0.776972	1.825	4.07688	0.0434739	0.441234
BRADI_1g37600v3	0.397454	8.39947	4.07532	0.0435141	0.441398
BRADI_3g34227v3	0.316361	4.85506	4.07039	0.0436412	0.442444
BRADI_5g08460v3	-0.966598	0.0607227	4.0677	0.0437107	0.442484
BRADI_4g40942v3	0.596379	1.78945	4.0676	0.0437133	0.442484
BRADI_2g16683v3	0.801097	1.5847	4.06643	0.0437436	0.442484
BRADI_5g12520v3	-0.639224	1.39793	4.06592	0.0437568	0.442484
BRADI_5g03350v3	-1.05425	0.0372975	4.06472	0.0437878	0.442484
BRADI_4g34750v3	0.344556	5.34653	4.06389	0.0438094	0.442484
BRADI_5g18360v3	0.836134	2.05985	4.06374	0.0438134	0.442484
BRADI_1g06451v3	0.361192	6.26396	4.06192	0.0438606	0.442696
BRADI_3g19893v3	-0.491675	2.16105	4.06054	0.0438964	0.442696
BRADI_1g50580v3	0.722681	6.14505	4.06015	0.0439065	0.442696
BRADI_5g14490v3	0.770417	4.81021	4.05501	0.0440406	0.443805
BRADI_3g50857v3	0.605337	1.3688	4.05296	0.0440939	0.444099
BRADI_5g20690v3	0.277576	4.88447	4.05189	0.0441219	0.444138
BRADI_2g57817v3	-0.297655	4.33534	4.05078	0.0441508	0.444186
BRADI_2g02740v3	0.29216	5.57524	4.04773	0.0442308	0.444748
BRADI_2g49291v3	0.276062	4.9496	4.04664	0.0442593	0.444791
BRADI_2g62165v3	0.580986	3.52013	4.04518	0.0442976	0.444934
BRADI_2g12427v3	0.382388	6.46122	4.04234	0.0443722	0.445364
BRADI_4g10441v3	0.378164	3.38917	4.04171	0.0443888	0.445364
BRADI_2g58350v3	-0.659955	5.63121	4.03858	0.0444712	0.445575
BRADI_1g75760v3	0.798657	0.447351	4.03843	0.0444751	0.445575
BRADI_4g14950v3	0.269935	8.11999	4.03738	0.0445028	0.445575
BRADI_1g46650v3	-0.298814	5.21854	4.03665	0.0445222	0.445575
BRADI_5g09750v3	-0.387162	4.09727	4.03632	0.0445309	0.445575
BRADI_4g12260v3	0.279635	5.56754	4.03435	0.0445828	0.445852
BRADI_1g24770v3	-0.555831	3.46407	4.03208	0.0446429	0.446211
BRADI_1g69710v3	-0.365185	3.95638	4.03076	0.0446777	0.446317
BRADI_2g07795v3	-0.866999	0.326384	4.02901	0.0447241	0.446538
BRADI_3g19850v3	0.252256	7.45635	4.02684	0.0447817	0.446871
BRADI_1g04750v3	0.564653	3.24076	4.02567	0.0448128	0.446938
BRADI_3g37670v3	1.223	4.15181	4.02392	0.0448594	0.447161
BRADI_1g75730v3	1.71096	5.30443	4.02216	0.0449061	0.447245
BRADI_1g68460v3	0.669117	7.50623	4.0209	0.0449398	0.447245
BRADI_4g34370v3	-0.387884	4.22785	4.02086	0.0449407	0.447245
BRADI_4g27440v3	-0.521405	2.77273	4.01706	0.045042	0.44789
BRADI_1g57880v3	0.51931	5.47982	4.01661	0.0450541	0.44789
BRADI_2g19147v3	-0.80224	0.643805	4.011	0.0452044	0.449052
BRADI_1g78310v3	0.941905	0.281037	4.01006	0.0452295	0.449052
BRADI_2g61550v3	0.939581	0.48513	4.00811	0.0452818	0.449052
BRADI_5g22151v3	-0.941794	0.482674	4.00682	0.0453164	0.449052
BRADI_1g70160v3	-0.298659	4.89612	4.00456	0.0453774	0.449052
BRADI_1g50067v3	-0.44137	6.43683	4.0045	0.0453789	0.449052
BRADI_1g58680v3	-0.62195	3.08191	4.00428	0.0453849	0.449052
BRADI_4g02580v3	0.640628	3.82613	4.00403	0.0453916	0.449052
BRADI_1g51020v3	0.253752	6.48372	4.00308	0.0454172	0.449052
BRADI_1g71810v3	-0.248467	6.25331	4.00181	0.0454515	0.449052
BRADI_2g23341v3	0.439826	3.27923	4.00115	0.0454692	0.449052
BRADI_2g35130v3	-0.658069	1.43367	4.00048	0.0454874	0.449052
BRADI_3g59057v3	0.239623	7.02357	4.00045	0.0454881	0.449052
BRADI_3g06070v3	-1.27724	7.06283	3.99659	0.0455924	0.44975
BRADI_4g38226v3	0.614202	1.76981	3.994	0.0456627	0.44975
BRADI_2g45220v3	-0.337404	3.90324	3.99382	0.0456673	0.44975
BRADI_5g13197v3	-0.58149	2.02456	3.99294	0.0456913	0.44975
BRADI_4g38480v3	0.316548	4.80164	3.99251	0.045703	0.44975
BRADI_3g02232v3	0.305398	4.21909	3.99242	0.0457054	0.44975
BRADI_3g57370v3	0.30459	4.62589	3.98994	0.0457726	0.449822
BRADI_1g67750v3	0.27382	4.87951	3.98978	0.0457769	0.449822
BRADI_3g60780v3	0.38478	3.90372	3.98945	0.0457861	0.449822
BRADI_2g52370v3	-1.15064	4.89299	3.98795	0.0458268	0.449921
BRADI_2g34650v3	1.48577	2.5647	3.98619	0.0458746	0.449921
BRADI_3g02410v3	0.320902	8.45877	3.98617	0.0458753	0.449921
BRADI_4g32300v3	0.960162	1.47751	3.98493	0.0459091	0.449921
BRADI_4g33440v3	0.349594	4.12673	3.98445	0.0459222	0.449921
BRADI_5g18843v3	0.527322	2.59965	3.98369	0.0459427	0.449921
BRADI_1g44000v3	0.721526	2.03589	3.98153	0.0460017	0.450234
BRADI_4g43110v3	0.263606	6.13573	3.97996	0.0460447	0.450234
BRADI_3g27870v3	-0.401933	4.38397	3.97983	0.0460481	0.450234
BRADI_4g34940v3	0.269057	4.44123	3.97861	0.0460815	0.450322
BRADI_4g09180v3	-0.964035	0.436979	3.97594	0.0461548	0.450352
BRADI_3g38670v3	-0.249083	5.7727	3.97588	0.0461562	0.450352
BRADI_2g04767v3	0.835533	0.745363	3.97582	0.0461579	0.450352
BRADI_5g01037v3	0.84809	1.26404	3.97431	0.0461995	0.450519
BRADI_2g08030v3	0.24189	7.54491	3.97177	0.046269	0.450818
BRADI_1g47250v3	0.341651	6.8195	3.97094	0.0462919	0.450818
BRADI_3g60680v3	-0.748203	1.4393	3.97004	0.0463167	0.450818
BRADI_1g72740v3	-0.382535	5.50969	3.96962	0.0463282	0.450818
BRADI_1g63690v3	0.434478	3.72688	3.9681	0.0463701	0.450988
BRADI_5g08907v3	0.322121	4.35135	3.96234	0.046529	0.452294
BRADI_5g08273v3	0.316319	4.3113	3.96076	0.0465728	0.452481
BRADI_1g45040v3	-0.432498	5.01273	3.9586	0.0466324	0.45282
BRADI_5g17900v3	1.10723	2.41724	3.95705	0.0466753	0.45282
BRADI_3g53950v3	-0.461669	2.41519	3.95662	0.0466872	0.45282
ENSRNA049996336	0.987271	-0.0448928	3.95595	0.0467061	0.45282
BRADI_4g35087v3	-0.405291	3.71837	3.95114	0.0468397	0.453755
BRADI_1g65870v3	-0.865668	0.769787	3.94929	0.0468913	0.453755
BRADI_1g43637v3	-0.324849	3.98795	3.94794	0.0469289	0.453755
BRADI_5g27596v3	0.290096	4.94321	3.9476	0.0469382	0.453755
BRADI_1g37183v3	0.33503	5.0189	3.94717	0.0469503	0.453755
BRADI_4g26310v3	-0.804429	0.453146	3.94717	0.0469504	0.453755
BRADI_1g24250v3	0.33712	5.19567	3.94255	0.0470795	0.454764
BRADI_2g25820v3	0.23961	6.91685	3.93993	0.0471527	0.455123
BRADI_2g03631v3	1.53016	2.6582	3.93871	0.0471871	0.455123
BRADI_1g05630v3	0.317934	4.86244	3.93782	0.0472118	0.455123
BRADI_3g55210v3	0.243517	8.06756	3.93769	0.0472155	0.455123
BRADI_1g28980v3	0.673784	2.17481	3.93577	0.0472695	0.455256
BRADI_1g50370v3	-0.447945	2.44135	3.93416	0.0473148	0.455256
BRADI_5g14170v3	-0.391517	4.76987	3.93414	0.0473153	0.455256
BRADI_3g21270v3	-0.873298	0.209719	3.93368	0.0473282	0.455256
BRADI_4g20527v3	-0.37168	3.25233	3.92815	0.0474841	0.456516
BRADI_4g38740v3	0.25778	5.97181	3.92691	0.0475192	0.456616
BRADI_4g39780v3	0.297922	4.76739	3.92564	0.0475551	0.456689
BRADI_4g22347v3	0.391331	3.10246	3.92488	0.0475765	0.456689
BRADI_1g61771v3	-0.543992	2.16451	3.91859	0.0477549	0.458056
BRADI_1g50780v3	-0.749884	0.967438	3.91811	0.0477686	0.458056
BRADI_5g26090v3	-0.363297	5.18828	3.91266	0.0479237	0.458801
BRADI_2g08340v3	0.25331	10.6245	3.91253	0.0479275	0.458801
BRADI_3g05670v3	0.630341	1.9138	3.91208	0.0479403	0.458801
BRADI_3g43370v3	0.57881	4.16522	3.91188	0.047946	0.458801
BRADI_2g05070v3	0.275252	8.11665	3.90777	0.0480634	0.459686
BRADI_2g37830v3	0.369995	3.82786	3.90375	0.0481784	0.460499
BRADI_4g37597v3	-0.286362	4.50207	3.90305	0.0481985	0.460499
BRADI_3g33106v3	1.15907	1.09922	3.90007	0.0482842	0.461079
BRADI_2g03610v3	1.69567	1.02169	3.89581	0.0484067	0.461914
BRADI_1g34150v3	-0.39365	2.94625	3.89518	0.048425	0.461914
BRADI_3g13250v3	-0.362941	4.62137	3.89442	0.0484469	0.461914
BRADI_5g21336v3	-0.666733	0.953763	3.89285	0.048492	0.462104
BRADI_2g35780v3	-0.670787	1.66419	3.89199	0.048517	0.462104
BRADI_4g35336v3	-0.310137	3.8243	3.88927	0.0485957	0.462499
BRADI_3g07150v3	0.316313	8.73735	3.88882	0.0486087	0.462499
BRADI_1g78090v3	0.281459	5.35465	3.88481	0.0487247	0.463169
BRADI_4g30380v3	-0.959687	3.09221	3.88465	0.0487295	0.463169
BRADI_1g60480v3	0.357415	5.3619	3.88187	0.0488102	0.463335
BRADI_2g21500v3	0.257779	6.81322	3.88137	0.0488248	0.463335
BRADI_1g27780v3	0.337837	3.90406	3.88098	0.048836	0.463335
BRADI_1g15377v3	0.248167	6.29929	3.88058	0.0488476	0.463335
BRADI_4g23380v3	0.401535	5.39167	3.87911	0.0488904	0.463355
BRADI_2g33180v3	0.30114	5.69906	3.87878	0.0489001	0.463355
BRADI_2g34140v3	-0.53346	2.53439	3.87615	0.0489769	0.463844
BRADI_4g28350v3	0.240806	9.00769	3.8701	0.0491537	0.465279
BRADI_3g34260v3	0.283902	5.09568	3.86667	0.049254	0.465894
BRADI_5g17150v3	1.12291	1.75256	3.86616	0.0492692	0.465894
BRADI_1g34700v3	-0.26062	6.57514	3.86491	0.0493057	0.465899
BRADI_3g09733v3	0.559441	2.25828	3.86442	0.0493204	0.465899
BRADI_3g11960v3	0.382966	4.46411	3.86148	0.0494068	0.466094
BRADI_1g35255v3	0.288493	4.51397	3.86123	0.049414	0.466094
BRADI_1g67083v3	0.48818	2.7378	3.86113	0.0494169	0.466094
ENSRNA049997750	-0.856477	0.582885	3.85572	0.0495765	0.467311
BRADI_1g66850v3	-0.285839	4.22216	3.85504	0.0495967	0.467311
BRADI_3g48690v3	0.389875	4.12001	3.85325	0.0496496	0.467486
BRADI_2g06930v3	0.541689	2.47752	3.8527	0.0496661	0.467486
BRADI_4g43590v3	0.493448	2.57128	3.85126	0.0497088	0.467649
BRADI_1g76130v3	0.284878	7.66736	3.84826	0.0497976	0.468245
BRADI_1g19730v3	0.317883	6.55626	3.84728	0.0498268	0.46828
BRADI_3g22930v3	0.396045	8.21178	3.84403	0.0499235	0.46895
BRADI_4g36680v3	1.28858	0.242768	3.84252	0.0499683	0.469094
BRADI_3g28657v3	1.19355	1.58145	3.8418	0.0499898	0.469094
BRADI_3g32497v3	0.269095	6.16224	3.83984	0.0500483	0.469403
BRADI_2g56000v3	-0.403265	4.82829	3.83689	0.0501363	0.469963
BRADI_5g10720v3	0.494895	3.09948	3.83542	0.0501805	0.469963
BRADI_1g05996v3	-0.767037	1.56798	3.83484	0.0501979	0.469963
BRADI_1g61413v3	0.314915	3.68532	3.83296	0.0502542	0.469963
BRADI_3g18970v3	0.471545	2.23959	3.83121	0.0503065	0.469963
BRADI_2g33960v3	-0.280966	5.2481	3.83058	0.0503256	0.469963
BRADI_2g26950v3	0.24122	6.81631	3.83027	0.0503348	0.469963
BRADI_2g57100v3	-0.360756	6.53389	3.82988	0.0503465	0.469963
BRADI_3g58280v3	0.292016	4.50327	3.82965	0.0503533	0.469963
BRADI_1g45607v3	-0.484249	2.50561	3.82905	0.0503715	0.469963
BRADI_1g41820v3	0.245709	8.7792	3.82778	0.0504096	0.469963
BRADI_2g57669v3	-1.07759	1.19647	3.82756	0.0504162	0.469963
BRADI_3g45720v3	-0.553997	1.89462	3.82678	0.0504398	0.469963
BRADI_1g14770v3	-0.272172	4.51914	3.82531	0.0504839	0.470136
BRADI_1g55822v3	0.423343	3.43575	3.82425	0.0505158	0.470196
BRADI_3g08020v3	-0.310933	3.99763	3.81914	0.0506703	0.471016
BRADI_1g66533v3	0.33293	5.79274	3.81864	0.0506853	0.471016
BRADI_1g57750v3	-0.329049	6.52743	3.81855	0.0506881	0.471016
BRADI_2g60180v3	-1.13168	-0.0830885	3.81771	0.0507135	0.471016
BRADI_3g57230v3	-0.630598	4.89015	3.8171	0.0507319	0.471016
BRADI_1g52381v3	0.67479	1.92845	3.814	0.0508258	0.471314
BRADI_2g01320v3	-0.346823	4.05938	3.81391	0.0508285	0.471314
BRADI_5g08637v3	0.418045	3.79031	3.81351	0.0508408	0.471314
BRADI_1g56640v3	0.385497	4.77583	3.81242	0.0508738	0.471382
BRADI_2g52850v3	-0.278108	4.63033	3.80764	0.0510193	0.472493
BRADI_2g62090v3	0.268127	4.79501	3.80618	0.0510639	0.472521
BRADI_2g07970v3	-0.53574	2.70741	3.80586	0.0510737	0.472521
BRADI_1g77867v3	0.272195	7.0843	3.80363	0.0511415	0.47253
BRADI_3g38917v3	0.313719	4.57798	3.80363	0.0511416	0.47253
BRADI_2g06260v3	-0.25213	6.51561	3.8033	0.0511516	0.47253
BRADI_1g58240v3	0.371932	7.42514	3.80056	0.0512355	0.473068
BRADI_2g54680v3	0.60326	5.3161	3.79796	0.0513151	0.473239
BRADI_3g05226v3	0.252551	6.2971	3.79754	0.051328	0.473239
BRADI_5g16770v3	-0.708618	2.45816	3.79694	0.0513462	0.473239
BRADI_5g08850v3	1.39574	-0.044112	3.79631	0.0513655	0.473239
BRADI_3g51950v3	0.585552	2.21904	3.79576	0.0513825	0.473239
[truncated: 16,412 more rows]

## Sheet: Hv.sen
geneID	logFC	logCPM	LR	PValue	FDR
HORVU1Hr1G065150	5.7139	2.27438	107.777	3.00804e-25	4.84054e-21
HORVU6Hr1G012090	11.5344	2.63303	83.5184	6.31261e-20	5.07912e-16
HORVU2Hr1G119500	5.57617	2.23867	68.8339	1.07116e-16	5.74569e-13
HORVU3Hr1G099440	-3.50313	2.63977	65.7809	5.03935e-16	2.02733e-12
HORVU2Hr1G124320	5.30605	-0.272484	57.195	3.94681e-14	1.27024e-10
HORVU7Hr1G036960	-3.28414	1.97524	54.6234	1.45988e-13	3.91541e-10
HORVU7Hr1G121210	-2.17907	5.18262	54.1556	1.85226e-13	4.25808e-10
HORVU4Hr1G013210	5.25787	2.30263	49.6605	1.82785e-12	3.62662e-09
HORVU6Hr1G017710	-1.58192	7.21602	49.4564	2.02831e-12	3.62662e-09
HORVU1Hr1G070220	2.91396	5.04744	49.0338	2.5159e-12	4.04858e-09
HORVU2Hr1G000090	6.69948	-0.196858	48.6574	3.0482e-12	4.45923e-09
HORVU1Hr1G063740	3.03818	2.77599	48.2652	3.72297e-12	4.93472e-09
HORVU1Hr1G081410	5.79407	1.00064	48.1311	3.98654e-12	4.93472e-09
HORVU3Hr1G097860	9.45967	0.589956	47.1858	6.45665e-12	7.42146e-09
HORVU4Hr1G082000	-3.0075	1.49708	46.6764	8.37317e-12	8.98274e-09
HORVU7Hr1G090410	7.29	7.43789	46.4283	9.50331e-12	9.55796e-09
HORVU2Hr1G026840	3.90295	-0.0583883	42.6833	6.436e-11	5.76449e-08
HORVU4Hr1G087770	-9.61656	2.63181	42.6796	6.44798e-11	5.76449e-08
HORVU7Hr1G107670	3.05019	0.371302	40.3553	2.11732e-10	1.67029e-07
HORVU6Hr1G059800	-1.68937	4.74787	40.3543	2.11837e-10	1.67029e-07
HORVU6Hr1G078640	2.07623	4.86569	40.2985	2.17972e-10	1.67029e-07
HORVU1Hr1G089520	10.842	1.9524	39.5848	3.14114e-10	2.2976e-07
HORVU1Hr1G088880	-4.53342	4.0247	37.9242	7.35487e-10	5.14585e-07
HORVU1Hr1G089620	8.43448	-0.367781	37.5103	9.09335e-10	6.09709e-07
HORVU7Hr1G109750	-3.62013	0.972592	37.4005	9.61952e-10	6.19189e-07
HORVU3Hr1G078360	2.43782	4.03034	37.2861	1.02011e-09	6.22569e-07
HORVU5Hr1G094400	-1.28412	7.42005	37.2398	1.04458e-09	6.22569e-07
HORVU1Hr1G075830	-2.67561	6.55082	37.1266	1.10702e-09	6.36223e-07
HORVU4Hr1G055220	-3.61956	2.31431	36.5753	1.46881e-09	8.15036e-07
HORVU3Hr1G010830	-1.48648	4.71138	36.3561	1.64363e-09	8.58155e-07
HORVU0Hr1G012930	3.16311	1.32545	36.3448	1.65317e-09	8.58155e-07
HORVU4Hr1G007220	2.46667	2.09454	35.6896	2.31391e-09	1.16361e-06
HORVU6Hr1G077070	1.35543	4.07641	34.9414	3.39786e-09	1.65692e-06
HORVU7Hr1G101310	3.06241	0.759575	34.5368	4.1827e-09	1.97965e-06
HORVU2Hr1G008090	-4.99344	0.715879	34.0671	5.32432e-09	2.44797e-06
HORVU6Hr1G059940	-4.24902	-0.229054	33.5009	7.1232e-09	3.18407e-06
HORVU3Hr1G117510	-1.56951	3.0062	33.3723	7.61009e-09	3.30977e-06
HORVU5Hr1G081190	-1.39306	4.64125	32.7084	1.07073e-08	4.53427e-06
HORVU2Hr1G026820	4.26984	0.409205	32.579	1.14444e-08	4.72212e-06
HORVU5Hr1G056100	5.56806	-0.526225	32.3679	1.27575e-08	5.13234e-06
HORVU1Hr1G070190	-1.50452	5.36775	31.8968	1.62584e-08	6.38124e-06
HORVU6Hr1G000480	1.475	4.00473	31.7453	1.7577e-08	6.73452e-06
HORVU1Hr1G083160	2.27833	4.44025	31.5971	1.89718e-08	7.09985e-06
HORVU3Hr1G021750	-1.14137	5.56197	31.2884	2.22401e-08	8.13382e-06
HORVU7Hr1G098820	-2.52087	0.213715	31.0388	2.52923e-08	9.04454e-06
HORVU3Hr1G070850	2.73852	4.32752	30.5078	3.32519e-08	1.16324e-05
HORVU3Hr1G077930	3.4382	4.15914	30.4267	3.46722e-08	1.18712e-05
HORVU1Hr1G088870	-5.54645	5.64502	29.5493	5.4513e-08	1.82755e-05
HORVU5Hr1G059280	5.89881	0.541034	29.4052	5.87213e-08	1.92846e-05
HORVU7Hr1G089700	-1.21694	7.4723	29.1326	6.75907e-08	2.15164e-05
HORVU1Hr1G022840	-1.6879	8.07037	29.1154	6.81913e-08	2.15164e-05
HORVU2Hr1G027480	7.36165	1.77976	29.0209	7.16029e-08	2.21583e-05
HORVU1Hr1G072780	1.23275	6.67476	28.6682	8.59045e-08	2.60825e-05
HORVU7Hr1G017640	3.17362	1.96789	28.3394	1.01803e-07	2.9822e-05
HORVU4Hr1G071070	-1.07304	4.59859	28.337	1.01927e-07	2.9822e-05
HORVU1Hr1G000320	3.9485	-0.00112373	28.2771	1.05135e-07	2.99759e-05
HORVU3Hr1G013970	-1.38222	7.21284	28.2579	1.06179e-07	2.99759e-05
HORVU5Hr1G060620	2.04841	3.74791	27.8736	1.29507e-07	3.59316e-05
HORVU1Hr1G071430	-1.50935	6.76772	27.6705	1.43837e-07	3.9231e-05
HORVU3Hr1G073740	-1.45791	5.10041	27.3169	1.72694e-07	4.63165e-05
HORVU5Hr1G072520	5.36784	1.97822	27.2133	1.82199e-07	4.80633e-05
HORVU3Hr1G013630	-3.49948	1.03775	27.1819	1.85181e-07	4.80633e-05
HORVU7Hr1G070870	-1.67109	7.62741	27.092	1.94002e-07	4.89749e-05
HORVU3Hr1G074360	8.15823	1.25815	27.0842	1.9478e-07	4.89749e-05
HORVU3Hr1G113120	5.50544	3.06998	27.0525	1.98007e-07	4.90203e-05
HORVU4Hr1G066000	-2.15326	5.22156	26.8128	2.24151e-07	5.46521e-05
HORVU5Hr1G070400	3.95669	1.38548	26.7073	2.36728e-07	5.68572e-05
HORVU4Hr1G062770	2.1398	1.54782	26.4728	2.67274e-07	6.32496e-05
HORVU3Hr1G048520	-1.48623	10.0368	26.3826	2.80046e-07	6.53116e-05
HORVU2Hr1G112060	4.41632	-0.811416	26.3433	2.85813e-07	6.57043e-05
HORVU6Hr1G032770	-1.10527	6.52577	26.1031	3.23667e-07	7.33585e-05
HORVU6Hr1G029750	4.07338	-0.396787	25.9802	3.44934e-07	7.70927e-05
HORVU2Hr1G101150	8.06445	-0.671825	25.7714	3.84338e-07	8.47229e-05
HORVU4Hr1G014270	-1.24818	6.69836	25.6569	4.07836e-07	8.86878e-05
HORVU3Hr1G074960	3.48626	1.17656	25.0871	5.47986e-07	0.000117576
HORVU5Hr1G092290	3.46177	-0.451454	24.821	6.29099e-07	0.000133203
HORVU3Hr1G105790	-1.86898	4.09725	24.6437	6.8969e-07	0.000144136
HORVU6Hr1G050370	-2.9695	1.2496	24.5903	7.09077e-07	0.000145097
HORVU7Hr1G032240	-1.00611	5.90893	24.5815	7.12322e-07	0.000145097
HORVU7Hr1G010790	-2.19016	2.06721	24.3639	7.97501e-07	0.000160417
HORVU1Hr1G057880	3.2455	5.40216	24.3211	8.15404e-07	0.000160707
HORVU4Hr1G090170	1.52313	3.47172	24.2959	8.2615e-07	0.000160707
HORVU1Hr1G065820	1.30122	3.11062	24.2895	8.28902e-07	0.000160707
HORVU6Hr1G054050	-1.42149	3.3594	24.1857	8.74784e-07	0.000167584
HORVU5Hr1G109940	-0.928776	7.32186	24.1406	8.955e-07	0.000169534
HORVU2Hr1G116670	-1.58414	3.47058	24.0323	9.47339e-07	0.000177057
HORVU2Hr1G089090	3.00834	1.30919	24.0123	9.57245e-07	0.000177057
HORVU5Hr1G084510	1.5018	3.35237	23.9797	9.73552e-07	0.000178027
HORVU0Hr1G007620	-1.04045	5.54665	23.8982	1.01568e-06	0.00018108
HORVU1Hr1G003230	-2.21206	0.299363	23.8669	1.03233e-06	0.00018108
HORVU7Hr1G083550	2.91715	1.11832	23.8623	1.03477e-06	0.00018108
HORVU4Hr1G074840	1.69382	3.48949	23.8614	1.03526e-06	0.00018108
HORVU1Hr1G060960	-1.0995	5.52887	23.7357	1.10513e-06	0.000190808
HORVU6Hr1G065210	-1.39788	5.48236	23.7067	1.1219e-06	0.000190808
HORVU0Hr1G011720	3.41531	-0.209428	23.6989	1.12644e-06	0.000190808
HORVU5Hr1G081500	3.18366	3.54935	23.4034	1.31345e-06	0.000220167
HORVU3Hr1G096720	2.69708	-0.102217	23.3372	1.35942e-06	0.000225434
HORVU3Hr1G059170	2.12886	2.51111	23.3183	1.37289e-06	0.000225434
HORVU3Hr1G000170	5.02305	-0.150976	23.1405	1.50586e-06	0.00024477
HORVU3Hr1G109430	4.32592	-0.030872	23.0008	1.61936e-06	0.000260587
HORVU2Hr1G116390	-2.59482	2.82326	22.9259	1.68371e-06	0.00026826
HORVU4Hr1G087340	1.34078	3.6887	22.8956	1.71044e-06	0.000269847
HORVU7Hr1G115780	1.11927	5.08851	22.8631	1.73959e-06	0.000271782
HORVU3Hr1G095340	-2.08723	2.58536	22.7138	1.88016e-06	0.000290919
HORVU1Hr1G091540	-1.18196	7.41156	22.6537	1.93989e-06	0.000297303
HORVU5Hr1G014170	-3.48236	8.58817	22.5977	1.9972e-06	0.000303197
HORVU3Hr1G087010	2.55853	5.21894	22.5489	2.04865e-06	0.000308101
HORVU5Hr1G042310	-1.21574	7.19625	22.5181	2.08176e-06	0.000310182
HORVU6Hr1G080420	-1.85436	5.18871	22.0483	2.65879e-06	0.000389687
HORVU6Hr1G016750	-1.90048	7.66203	22.0447	2.66378e-06	0.000389687
HORVU3Hr1G112030	4.07934	-0.828082	21.9755	2.76149e-06	0.000400341
HORVU5Hr1G052150	4.53315	4.03216	21.9413	2.81124e-06	0.000403915
HORVU1Hr1G008360	9.51245	0.663959	21.8186	2.99678e-06	0.000426762
HORVU3Hr1G092840	-1.09855	8.94171	21.7743	3.06681e-06	0.000432904
HORVU5Hr1G113470	-1.62409	2.98772	21.7362	3.12833e-06	0.000437749
HORVU3Hr1G105720	3.95075	1.84639	21.7102	3.17108e-06	0.000439905
HORVU2Hr1G114450	7.1438	1.66838	21.5904	3.37543e-06	0.000464251
HORVU3Hr1G077950	3.15512	2.44826	21.4912	3.55448e-06	0.000484734
HORVU6Hr1G083720	1.45507	4.77962	21.4269	3.67576e-06	0.000497061
HORVU2Hr1G099540	-3.43144	3.4814	21.3467	3.83274e-06	0.000511367
HORVU6Hr1G073280	-2.15193	1.52661	21.3406	3.8451e-06	0.000511367
HORVU3Hr1G029350	-1.19308	5.18311	21.25	4.03104e-06	0.000528175
HORVU2Hr1G084420	-1.31356	4.45902	21.2471	4.03713e-06	0.000528175
HORVU5Hr1G023090	-1.69526	4.0669	21.0013	4.58978e-06	0.000590056
HORVU5Hr1G095130	1.89223	1.92403	20.9951	4.60471e-06	0.000590056
HORVU2Hr1G114440	6.0528	1.37656	20.9886	4.62013e-06	0.000590056
HORVU1Hr1G000520	1.47981	3.6462	20.9671	4.67228e-06	0.000592018
HORVU2Hr1G082760	4.03908	-0.239226	20.8875	4.8706e-06	0.000612325
HORVU6Hr1G067060	1.72008	2.79569	20.7843	5.14018e-06	0.000640155
HORVU5Hr1G068960	-1.18793	3.97988	20.7727	5.17152e-06	0.000640155
HORVU1Hr1G053070	1.61351	3.61182	20.6957	5.38355e-06	0.000661313
HORVU3Hr1G028620	2.84563	0.2103	20.6715	5.45206e-06	0.00066324
HORVU5Hr1G000940	6.57533	2.2019	20.6612	5.48166e-06	0.00066324
HORVU5Hr1G046480	-2.64755	0.592466	20.6124	5.62321e-06	0.000675289
HORVU2Hr1G028670	7.60868	-1.07551	20.1707	7.083e-06	0.000844293
HORVU7Hr1G062090	1.32589	3.79847	20.144	7.18261e-06	0.000849872
HORVU4Hr1G089350	1.14449	4.33345	20.1194	7.2754e-06	0.000854568
HORVU5Hr1G086670	-1.76831	7.7399	20.0473	7.55497e-06	0.000880975
HORVU7Hr1G029460	2.44897	-0.490755	19.9398	7.99179e-06	0.000925207
HORVU3Hr1G093170	4.37066	0.339169	19.9253	8.05271e-06	0.000925602
HORVU2Hr1G017370	5.12023	0.834291	19.7919	8.63475e-06	0.000985464
HORVU3Hr1G085760	3.01124	4.55363	19.7435	8.85614e-06	0.00100291
HORVU5Hr1G099390	5.6412	-0.0981054	19.7314	8.91226e-06	0.00100291
HORVU3Hr1G053210	1.85109	2.67586	19.6901	9.10724e-06	0.00101462
HORVU2Hr1G093210	-2.05017	3.88185	19.6827	9.14238e-06	0.00101462
HORVU6Hr1G050440	-1.05837	9.12607	19.6278	9.40906e-06	0.00103706
HORVU7Hr1G006910	-1.59697	5.65448	19.5567	9.76578e-06	0.00106905
HORVU7Hr1G121100	-1.24641	3.98054	19.5014	1.00526e-05	0.0010891
HORVU3Hr1G023430	-2.09253	0.581301	19.4954	1.00843e-05	0.0010891
HORVU3Hr1G089300	8.42535	1.46152	19.4545	1.03022e-05	0.00110522
HORVU6Hr1G084070	6.3127	1.67566	19.413	1.05288e-05	0.00112204
HORVU0Hr1G012140	1.88945	1.11281	19.327	1.10139e-05	0.00116603
HORVU7Hr1G040370	-3.12356	5.00241	19.2628	1.13903e-05	0.00119799
HORVU1Hr1G086930	-1.0888	5.99836	19.246	1.14909e-05	0.00120072
HORVU2Hr1G041590	-1.57257	6.0283	19.2086	1.17182e-05	0.00121658
HORVU3Hr1G112050	4.65836	-0.349771	19.1745	1.19295e-05	0.00123058
HORVU7Hr1G025910	-0.854073	5.70955	19.1232	1.22546e-05	0.00125606
HORVU7Hr1G083360	-0.897387	5.85093	19.0695	1.26045e-05	0.00128001
HORVU5Hr1G110920	-0.848294	6.34097	19.063	1.26473e-05	0.00128001
HORVU2Hr1G077990	1.81027	3.16772	19.0082	1.30155e-05	0.00130903
HORVU6Hr1G012110	-3.10518	2.87164	18.9428	1.34695e-05	0.00134628
HORVU1Hr1G014010	1.16493	5.93245	18.9212	1.36234e-05	0.00135326
HORVU3Hr1G014140	3.22766	1.53701	18.8156	1.43983e-05	0.00142145
HORVU6Hr1G029540	2.32965	1.05678	18.7905	1.45889e-05	0.00143149
HORVU1Hr1G083960	0.939039	5.70202	18.7496	1.49053e-05	0.00145367
HORVU1Hr1G072890	-1.51956	7.88589	18.7315	1.50476e-05	0.00145871
HORVU2Hr1G102100	-2.0378	3.25544	18.6647	1.55841e-05	0.00149656
HORVU6Hr1G024660	1.28838	2.69881	18.6598	1.5624e-05	0.00149656
HORVU2Hr1G113180	2.21216	6.24622	18.501	1.69819e-05	0.00160928
HORVU5Hr1G005180	3.30033	4.46979	18.4942	1.70426e-05	0.00160928
HORVU1Hr1G078030	1.03542	4.72113	18.4877	1.71008e-05	0.00160928
HORVU7Hr1G049630	4.13705	-0.0638028	18.473	1.72325e-05	0.00161224
HORVU4Hr1G040290	-1.33615	7.60662	18.4407	1.75271e-05	0.00163032
HORVU1Hr1G091850	-1.89098	0.501941	18.3548	1.83354e-05	0.00169571
HORVU5Hr1G105840	2.04638	1.22897	18.277	1.91002e-05	0.00175634
HORVU5Hr1G122180	-2.07859	0.0591827	18.2654	1.92167e-05	0.00175702
HORVU3Hr1G001940	-1.01035	6.21582	18.2022	1.98648e-05	0.00180601
HORVU5Hr1G058300	-1.21629	7.15166	18.136	2.05678e-05	0.00185942
HORVU2Hr1G028430	2.15687	3.33529	18.0967	2.09967e-05	0.00188759
HORVU1Hr1G043520	1.04177	5.40322	17.9377	2.28252e-05	0.00203047
HORVU5Hr1G093160	1.10471	4.45952	17.93	2.29179e-05	0.00203047
HORVU7Hr1G113290	2.23318	0.567999	17.9261	2.29646e-05	0.00203047
HORVU7Hr1G072960	4.67322	-0.628728	17.8755	2.35842e-05	0.00207387
HORVU4Hr1G010270	-1.07195	6.59409	17.7839	2.47464e-05	0.00216423
HORVU7Hr1G047000	-1.06714	4.88231	17.732	2.54308e-05	0.00220962
HORVU3Hr1G090820	-1.00361	4.1571	17.7239	2.554e-05	0.00220962
HORVU2Hr1G077650	-1.00979	7.73515	17.6972	2.59007e-05	0.00222568
HORVU5Hr1G070230	-0.910593	5.87706	17.6898	2.60022e-05	0.00222568
HORVU2Hr1G107100	3.16559	0.859515	17.669	2.62872e-05	0.00223816
HORVU3Hr1G011850	4.96514	-0.585394	17.6013	2.72405e-05	0.00230712
HORVU2Hr1G078910	0.891156	6.49466	17.5884	2.7425e-05	0.0023089
HORVU6Hr1G053710	3.49831	0.310517	17.5776	2.75811e-05	0.0023089
HORVU6Hr1G078260	-2.35358	1.59829	17.57	2.76919e-05	0.0023089
HORVU3Hr1G059290	-1.13674	7.88355	17.5501	2.79832e-05	0.00232117
HORVU2Hr1G096810	-2.16626	0.479052	17.3572	3.09727e-05	0.00255597
HORVU5Hr1G023520	1.41985	3.21896	17.3154	3.16608e-05	0.0025889
HORVU3Hr1G032370	3.64079	2.79296	17.3134	3.16936e-05	0.0025889
HORVU1Hr1G079130	2.46569	1.9683	17.2114	3.34415e-05	0.00271788
HORVU2Hr1G104920	-0.939872	6.83376	17.0794	3.58499e-05	0.00289897
HORVU7Hr1G045280	-2.72638	0.783006	17.0324	3.67479e-05	0.00295674
HORVU7Hr1G098830	-1.13945	4.11804	16.8965	3.94739e-05	0.00316027
HORVU4Hr1G062830	1.54872	1.19553	16.8477	4.05019e-05	0.00322652
HORVU1Hr1G049420	-1.53662	3.27819	16.8172	4.11583e-05	0.00326266
HORVU3Hr1G060390	-1.23546	6.68486	16.6872	4.40766e-05	0.00347686
HORVU1Hr1G081490	1.24019	4.89042	16.6249	4.55484e-05	0.00357544
HORVU5Hr1G092760	-0.807196	4.51791	16.6051	4.60268e-05	0.00359545
HORVU7Hr1G082450	2.21561	2.76475	16.5261	4.79842e-05	0.00371904
HORVU1Hr1G080070	1.20624	4.26487	16.5171	4.82124e-05	0.00371904
HORVU1Hr1G080680	3.78708	0.87433	16.505	4.85226e-05	0.00371904
HORVU3Hr1G081600	-1.94198	6.10859	16.5046	4.85333e-05	0.00371904
HORVU2Hr1G007980	-0.793381	4.86458	16.4892	4.89286e-05	0.00373156
HORVU4Hr1G084340	0.985276	3.79466	16.4297	5.04867e-05	0.00383222
HORVU4Hr1G065470	1.87052	3.55089	16.41	5.10154e-05	0.00385418
HORVU5Hr1G054000	-0.873306	7.12025	16.385	5.1694e-05	0.0038872
HORVU5Hr1G100910	1.00507	5.99595	16.3178	5.35585e-05	0.00400867
HORVU5Hr1G081620	-1.08868	8.83274	16.2878	5.44127e-05	0.00405375
HORVU3Hr1G002010	1.02613	3.56471	16.255	5.53644e-05	0.00410564
HORVU7Hr1G088260	1.97681	2.72519	16.2411	5.5771e-05	0.00411682
HORVU7Hr1G120030	1.04874	5.94625	16.1296	5.91527e-05	0.00434651
HORVU2Hr1G111600	1.2643	3.08863	16.1148	5.96154e-05	0.0043606
HORVU6Hr1G058840	3.88856	0.287493	16.0951	6.02403e-05	0.00436948
HORVU0Hr1G016860	-1.39488	6.22163	16.0938	6.028e-05	0.00436948
HORVU4Hr1G085460	1.91361	0.800856	16.0491	6.17196e-05	0.00444945
HORVU2Hr1G097730	2.23365	0.462243	16.0425	6.19362e-05	0.00444945
HORVU4Hr1G071730	-1.08554	8.69462	16.0316	6.22944e-05	0.0044553
HORVU2Hr1G102710	5.37402	1.56562	15.9979	6.34142e-05	0.00451532
HORVU0Hr1G031970	-2.63288	0.642235	15.9744	6.42036e-05	0.00455139
HORVU0Hr1G010880	4.70019	0.117727	15.8998	6.67874e-05	0.00470937
HORVU2Hr1G085000	-0.950447	5.37467	15.8932	6.70176e-05	0.00470937
HORVU2Hr1G027040	-0.869253	8.27826	15.8834	6.73655e-05	0.00471325
HORVU1Hr1G089180	-2.5889	5.53581	15.764	7.17556e-05	0.00499601
HORVU2Hr1G006830	-0.903579	7.36242	15.7568	7.20279e-05	0.00499601
HORVU0Hr1G039970	2.17469	1.9453	15.7263	7.31981e-05	0.00505425
HORVU6Hr1G067920	4.15176	-1.00185	15.7187	7.34958e-05	0.00505425
HORVU7Hr1G068630	1.09264	7.40623	15.6987	7.4277e-05	0.00508624
HORVU5Hr1G061140	0.953855	4.78352	15.684	7.48561e-05	0.00510417
HORVU1Hr1G091520	-2.40936	4.40358	15.6679	7.54939e-05	0.00512594
HORVU7Hr1G009800	-0.73864	5.41878	15.6527	7.61054e-05	0.00514575
HORVU6Hr1G073510	1.56789	2.10863	15.5949	7.84665e-05	0.0052832
HORVU2Hr1G023480	-0.82927	9.27773	15.5834	7.8946e-05	0.0052833
HORVU7Hr1G092510	4.01429	3.5133	15.5791	7.91248e-05	0.0052833
HORVU2Hr1G057960	0.764678	4.76089	15.562	7.98451e-05	0.00530937
HORVU7Hr1G083230	2.44221	0.467617	15.4914	8.28806e-05	0.00546019
HORVU3Hr1G000350	-0.856656	6.38545	15.4907	8.29129e-05	0.00546019
HORVU2Hr1G018820	1.14298	3.0927	15.481	8.33368e-05	0.00546019
HORVU6Hr1G052420	-1.06163	4.98162	15.478	8.34705e-05	0.00546019
HORVU5Hr1G104380	0.768656	7.31313	15.4464	8.48775e-05	0.00552975
HORVU4Hr1G067930	-0.904753	4.24896	15.3982	8.70696e-05	0.00564969
HORVU2Hr1G027370	1.31942	4.27093	15.3514	8.9253e-05	0.00576811
HORVU4Hr1G039410	-1.29081	4.84213	15.318	9.08469e-05	0.0058244
HORVU2Hr1G110230	1.29976	5.49643	15.318	9.08479e-05	0.0058244
HORVU3Hr1G090730	0.829923	4.44821	15.2768	9.28488e-05	0.00592906
HORVU3Hr1G027650	-1.16676	3.97658	15.2284	9.52609e-05	0.00604207
HORVU0Hr1G019800	1.00681	3.24423	15.2262	9.53694e-05	0.00604207
HORVU0Hr1G007340	4.59544	0.00253171	15.1955	9.69329e-05	0.00611328
HORVU7Hr1G002850	1.6597	1.88417	15.1893	9.72532e-05	0.00611328
HORVU5Hr1G043600	-0.862058	8.88875	15.0796	0.000103073	0.00645391
HORVU6Hr1G016940	-3.17753	3.55069	15.0651	0.000103868	0.00647848
HORVU2Hr1G027400	1.28412	4.11054	15.004	0.000107282	0.00665729
HORVU2Hr1G107860	1.22761	3.52426	14.9812	0.000108589	0.00665729
HORVU7Hr1G084920	3.72639	0.740501	14.9757	0.000108905	0.00665729
HORVU1Hr1G063410	0.829711	5.40461	14.9745	0.000108974	0.00665729
HORVU2Hr1G094230	3.5249	0.683681	14.9726	0.000109086	0.00665729
HORVU7Hr1G118900	-2.58443	1.25359	14.9651	0.000109518	0.00665729
HORVU1Hr1G007810	2.33966	4.67148	14.9632	0.000109631	0.00665729
HORVU5Hr1G088350	-0.744831	6.11962	14.9222	0.000112038	0.0067779
HORVU2Hr1G066790	1.14789	5.54087	14.9019	0.000113251	0.00681662
HORVU3Hr1G019670	-0.885324	4.47428	14.8973	0.000113526	0.00681662
HORVU5Hr1G071270	2.10794	4.11102	14.8056	0.000119178	0.00712944
HORVU1Hr1G061160	-0.933227	9.11505	14.7849	0.000120496	0.00718154
HORVU4Hr1G029350	-0.848811	5.52829	14.7728	0.00012127	0.007201
HORVU3Hr1G011200	1.80738	0.041897	14.7161	0.000124974	0.0073937
HORVU2Hr1G114910	1.35201	1.94444	14.6871	0.000126914	0.00748096
HORVU3Hr1G069650	2.93583	0.242968	14.6749	0.000127733	0.00750173
HORVU4Hr1G077220	-0.897671	8.34704	14.6623	0.000128591	0.00752467
HORVU6Hr1G095330	-2.65291	-0.27231	14.6491	0.000129496	0.0075502
HORVU3Hr1G074250	-0.974501	9.15987	14.6306	0.000130771	0.00759697
HORVU1Hr1G086460	-0.912683	5.0835	14.607	0.000132425	0.0076654
HORVU6Hr1G054940	-0.875258	10.5962	14.5885	0.000133726	0.00771294
HORVU7Hr1G003630	4.1331	0.547896	14.5568	0.000135999	0.00781608
HORVU7Hr1G097630	0.879074	5.17816	14.5481	0.000136623	0.00782398
HORVU7Hr1G090360	0.669217	5.47149	14.4916	0.000140784	0.00803365
HORVU7Hr1G026740	-0.897023	4.92196	14.4793	0.000141706	0.0080577
HORVU5Hr1G119520	-4.98556	1.69465	14.4582	0.000143302	0.0081198
HORVU4Hr1G052450	2.39569	4.01442	14.4463	0.000144215	0.00814283
HORVU5Hr1G117770	1.04108	4.84755	14.4395	0.000144737	0.00814374
HORVU1Hr1G029460	1.29593	2.48314	14.4316	0.000145345	0.00814948
HORVU4Hr1G013180	-1.63613	2.25718	14.3791	0.000149454	0.00834738
HORVU1Hr1G093480	2.33452	6.4443	14.3724	0.000149985	0.00834738
HORVU1Hr1G002150	-1.08542	8.03375	14.3668	0.000150431	0.00834738
HORVU3Hr1G063000	-0.76413	5.60567	14.3425	0.000152384	0.00840175
HORVU2Hr1G095080	0.9211	5.56505	14.3416	0.000152455	0.00840175
HORVU3Hr1G111040	-0.857481	4.93195	14.332	0.000153238	0.00840998
HORVU1Hr1G021680	2.37146	3.32857	14.3269	0.00015365	0.00840998
HORVU1Hr1G004230	-0.974135	5.30707	14.3131	0.000154786	0.00844347
HORVU5Hr1G104960	1.65413	1.69719	14.2688	0.000158471	0.00861526
HORVU4Hr1G083980	-1.27381	4.90163	14.2509	0.000159984	0.00866825
HORVU2Hr1G080140	1.88313	1.66469	14.2335	0.000161466	0.00870794
HORVU6Hr1G059420	0.927229	6.46469	14.2297	0.000161799	0.00870794
HORVU5Hr1G065890	-0.880471	7.78426	14.1563	0.000168236	0.00901325
HORVU3Hr1G012650	-0.782532	5.75699	14.1523	0.000168592	0.00901325
HORVU3Hr1G067380	1.61395	5.38513	14.1383	0.000169854	0.00903917
HORVU1Hr1G065470	0.998708	4.43114	14.1344	0.000170201	0.00903917
HORVU3Hr1G067290	1.26024	3.36652	14.0728	0.000175868	0.00930944
HORVU5Hr1G085120	1.08212	2.36099	14.0541	0.000177625	0.0093716
HORVU7Hr1G117550	1.23641	2.83981	14.0344	0.000179492	0.00943917
HORVU1Hr1G086070	-0.997598	5.43656	14.0178	0.000181088	0.00949208
HORVU1Hr1G010810	-1.11916	3.23784	13.9801	0.00018476	0.00965311
HORVU3Hr1G068750	1.14127	2.39351	13.9252	0.000190235	0.00989065
HORVU2Hr1G084600	1.11618	3.23726	13.9222	0.000190536	0.00989065
HORVU1Hr1G049270	2.0364	2.13307	13.8974	0.000193068	0.00996305
HORVU3Hr1G065320	2.70487	5.0359	13.8964	0.000193169	0.00996305
HORVU5Hr1G098770	1.81547	1.83753	13.8676	0.000196153	0.0100847
HORVU5Hr1G035820	1.0363	4.33828	13.7987	0.000203473	0.0104277
HORVU5Hr1G047060	1.50149	3.91811	13.7892	0.000204507	0.0104474
HORVU4Hr1G068960	1.05253	3.0387	13.7423	0.000209681	0.0106778
HORVU5Hr1G038920	1.04031	7.3325	13.7004	0.000214405	0.010872
HORVU7Hr1G089470	1.02964	4.8169	13.6966	0.000214845	0.010872
HORVU6Hr1G089540	-0.721505	8.71864	13.6771	0.000217091	0.0109265
HORVU5Hr1G011920	1.45544	0.36351	13.6754	0.000217281	0.0109265
HORVU3Hr1G080500	-1.62696	5.75241	13.6656	0.000218415	0.0109493
HORVU6Hr1G029880	1.014	5.16502	13.6566	0.000219465	0.0109678
HORVU1Hr1G071620	1.18962	4.56401	13.6416	0.000221224	0.0109922
HORVU6Hr1G037940	0.894133	4.8147	13.6408	0.000221319	0.0109922
HORVU5Hr1G076110	0.846222	4.72946	13.6084	0.000225177	0.0111494
HORVU0Hr1G002720	2.73662	1.6212	13.6009	0.000226073	0.0111594
HORVU6Hr1G033310	-1.49164	0.893217	13.5498	0.000232314	0.0114324
HORVU7Hr1G118090	-3.31455	0.116086	13.5382	0.000233751	0.0114681
HORVU7Hr1G082830	2.72493	1.80159	13.4433	0.000245886	0.0120092
HORVU5Hr1G086710	-0.976842	5.06942	13.4403	0.000246273	0.0120092
HORVU7Hr1G057650	1.95541	0.919192	13.4257	0.000248197	0.0120106
HORVU0Hr1G024070	-2.82147	1.07291	13.4243	0.000248382	0.0120106
HORVU0Hr1G022340	1.46696	0.78413	13.4231	0.000248541	0.0120106
HORVU2Hr1G117360	-1.22524	3.04349	13.4133	0.000249851	0.0120377
HORVU6Hr1G014650	-1.10877	5.16069	13.3673	0.00025605	0.0122996
HORVU7Hr1G028370	2.2434	6.55116	13.3367	0.000260258	0.0124645
HORVU2Hr1G114720	-0.999262	8.49812	13.3042	0.000264819	0.0126108
HORVU7Hr1G116650	2.57607	0.25523	13.299	0.000265549	0.0126108
HORVU7Hr1G059090	1.04443	7.05221	13.2982	0.000265664	0.0126108
HORVU6Hr1G009360	-2.05958	5.15062	13.2888	0.000266998	0.0126369
HORVU3Hr1G115940	0.844121	4.56627	13.2752	0.000268944	0.0126917
HORVU7Hr1G032750	0.718161	6.74466	13.257	0.000271563	0.0127602
HORVU3Hr1G111600	4.04104	4.03291	13.2461	0.000273154	0.0127602
HORVU4Hr1G023680	-1.87505	2.98242	13.2413	0.000273844	0.0127602
HORVU5Hr1G062090	1.05903	6.84022	13.2387	0.00027423	0.0127602
HORVU7Hr1G078690	-1.346	5.01868	13.2378	0.000274361	0.0127602
HORVU3Hr1G059710	1.08786	3.57066	13.176	0.000283563	0.0131247
HORVU7Hr1G090560	1.74404	2.00891	13.1742	0.000283831	0.0131247
HORVU5Hr1G011850	0.948767	4.51521	13.1191	0.000292299	0.0134776
HORVU1Hr1G086870	-0.796802	5.71747	13.1059	0.000294366	0.0135341
HORVU3Hr1G023230	2.29969	3.20158	13.0558	0.000302353	0.0138617
HORVU4Hr1G021000	-0.782687	9.07499	13.0472	0.000303737	0.0138856
HORVU2Hr1G026200	1.23329	3.96439	13.0351	0.000305708	0.0139361
HORVU7Hr1G009350	2.96317	-0.865109	13.0239	0.000307546	0.0139803
HORVU1Hr1G092290	-1.49191	2.81913	13.004	0.000310821	0.0140813
HORVU3Hr1G068700	1.99199	3.8267	12.9998	0.000311518	0.0140813
HORVU7Hr1G091860	4.97796	3.74372	12.9942	0.000312461	0.0140844
HORVU5Hr1G117600	1.01268	2.80816	12.9769	0.000315366	0.0141756
HORVU7Hr1G085130	3.98669	-1.21687	12.9175	0.000325516	0.0145911
HORVU1Hr1G035100	0.838248	5.91686	12.9095	0.000326921	0.0146134
HORVU3Hr1G082930	1.07017	3.81324	12.9027	0.000328116	0.0146261
HORVU3Hr1G094100	1.70608	0.481605	12.837	0.000339824	0.0151062
HORVU3Hr1G087420	-3.44344	1.06916	12.8259	0.00034185	0.0151449
HORVU5Hr1G073950	-0.790302	7.42467	12.8219	0.000342577	0.0151449
HORVU5Hr1G088200	-0.858359	6.05764	12.7876	0.000348924	0.0153679
HORVU5Hr1G088530	1.91717	1.62132	12.7844	0.000349531	0.0153679
HORVU2Hr1G022140	1.2084	3.73881	12.7419	0.000357561	0.0156781
HORVU1Hr1G015940	-0.677895	6.51228	12.7345	0.000358975	0.0156883
HORVU2Hr1G020690	1.05402	6.17423	12.7305	0.000359743	0.0156883
HORVU6Hr1G063480	3.35578	0.547137	12.7148	0.000362764	0.0157773
HORVU5Hr1G087990	-0.808881	6.4236	12.6621	0.000373141	0.0161849
HORVU5Hr1G093860	3.68424	2.75756	12.6497	0.000375635	0.0162492
HORVU2Hr1G102110	-1.83488	4.5165	12.6388	0.000377818	0.016288
HORVU3Hr1G094160	-0.990172	2.73578	12.6352	0.000378556	0.016288
HORVU2Hr1G099510	-1.81039	2.35803	12.6159	0.00038247	0.0163634
HORVU4Hr1G000910	1.74144	3.44593	12.6105	0.00038358	0.0163634
HORVU2Hr1G072890	-0.714917	4.82681	12.6083	0.000384036	0.0163634
HORVU4Hr1G079400	-0.815958	8.52961	12.6067	0.000384376	0.0163634
HORVU5Hr1G103420	3.95451	0.121036	12.5887	0.000388086	0.0164778
HORVU1Hr1G038180	1.09845	6.25565	12.5801	0.000389875	0.0165102
HORVU5Hr1G065660	2.10978	2.56806	12.5633	0.000393402	0.0166158
HORVU5Hr1G084010	-0.86852	6.26921	12.5344	0.000399518	0.01683
HORVU5Hr1G042080	-1.04378	5.53038	12.5277	0.000400963	0.0168467
HORVU4Hr1G005920	1.04592	7.39101	12.519	0.000402837	0.0168814
HORVU2Hr1G099450	-1.37619	5.49657	12.5077	0.000405271	0.0169393
HORVU1Hr1G085720	2.64213	0.138469	12.488	0.000409579	0.017075
HORVU3Hr1G084660	-0.679318	5.69974	12.483	0.000410676	0.0170765
HORVU4Hr1G023490	1.32306	3.23179	12.4697	0.000413602	0.0171538
HORVU1Hr1G044770	-3.49382	1.9816	12.4591	0.00041595	0.0172069
HORVU5Hr1G077140	1.64506	6.60434	12.4311	0.000422241	0.0174223
HORVU2Hr1G114390	5.37441	1.9835	12.409	0.000427276	0.017585
HORVU7Hr1G077110	-1.74837	3.78927	12.3949	0.000430514	0.017673
HORVU5Hr1G065370	2.03181	3.41461	12.3754	0.000435026	0.0178128
HORVU0Hr1G018830	2.18019	0.282366	12.3595	0.000438759	0.0179201
HORVU2Hr1G095880	3.516	3.66054	12.342	0.000442891	0.0179998
HORVU7Hr1G042900	2.1352	-0.587919	12.3417	0.000442947	0.0179998
HORVU1Hr1G079270	-0.815808	5.43534	12.3238	0.000447229	0.0180858
HORVU4Hr1G018150	1.9158	3.52057	12.3234	0.000447313	0.0180858
HORVU7Hr1G091910	2.35942	0.156853	12.2802	0.000457791	0.0184631
HORVU2Hr1G113350	-1.30222	2.49954	12.2656	0.000461392	0.0185618
HORVU6Hr1G015130	-1.16164	6.71057	12.247	0.000465997	0.0186541
HORVU3Hr1G066650	2.11675	0.14493	12.247	0.000466005	0.0186541
HORVU5Hr1G098980	-0.864454	8.04353	12.2331	0.000469488	0.0187023
HORVU7Hr1G118340	1.31903	3.71424	12.2329	0.000469534	0.0187023
HORVU3Hr1G023160	1.07213	3.20625	12.2244	0.000471673	0.0187411
HORVU3Hr1G057530	-1.28235	8.11073	12.2157	0.000473889	0.0187828
HORVU2Hr1G073030	-1.6611	3.75535	12.2071	0.000476079	0.0188233
HORVU2Hr1G098020	0.793302	5.90028	12.1889	0.00048074	0.0189609
HORVU1Hr1G007800	5.25305	2.18112	12.1714	0.00048529	0.0190936
HORVU7Hr1G088620	-0.927886	4.01086	12.1483	0.000491324	0.0192148
HORVU4Hr1G065110	-0.89974	7.04757	12.1475	0.000491549	0.0192148
HORVU1Hr1G064600	0.909781	3.37788	12.1425	0.000492868	0.0192148
HORVU3Hr1G023750	1.51178	3.21778	12.1414	0.000493145	0.0192148
HORVU5Hr1G119250	1.53832	0.219048	12.136	0.000494582	0.0192242
HORVU1Hr1G012730	0.917675	3.10506	12.1232	0.000497973	0.0193094
HORVU5Hr1G107260	0.67097	5.37764	12.1162	0.000499848	0.0193355
HORVU5Hr1G030460	-0.776102	5.19749	12.1107	0.000501336	0.0193465
HORVU4Hr1G056950	-0.972074	4.01826	12.1034	0.00050331	0.0193762
HORVU4Hr1G057000	-2.61785	6.06935	12.0952	0.000505516	0.0194147
HORVU1Hr1G078370	0.815627	4.58939	12.057	0.000515971	0.0197691
HORVU5Hr1G074900	1.77094	0.140169	12.0426	0.000519977	0.0198752
HORVU7Hr1G008390	1.52769	5.01542	12.0377	0.00052136	0.0198809
HORVU7Hr1G088730	1.327	2.13089	12.0119	0.000528613	0.0201098
HORVU1Hr1G095080	0.756315	4.82376	11.9934	0.000533892	0.0202489
HORVU6Hr1G091160	2.14513	1.28683	11.9865	0.000535887	0.0202489
HORVU2Hr1G112620	-1.72176	4.77372	11.9812	0.000537396	0.0202489
HORVU3Hr1G085480	1.83067	1.05513	11.9786	0.000538137	0.0202489
HORVU4Hr1G075320	1.11022	3.28397	11.9772	0.000538561	0.0202489
HORVU1Hr1G018720	-0.938254	9.31178	11.9552	0.000544954	0.0204415
HORVU7Hr1G044670	-0.790712	6.63736	11.9458	0.000547719	0.0204954
HORVU5Hr1G070240	1.22123	2.61441	11.9399	0.000549456	0.0204954
HORVU7Hr1G048620	1.70239	2.94702	11.9373	0.000550213	0.0204954
HORVU1Hr1G092300	-1.90667	3.70499	11.9295	0.000552513	0.0205336
HORVU4Hr1G054880	0.977074	4.1135	11.9111	0.000558019	0.0206904
HORVU7Hr1G026770	-0.752411	4.40477	11.8866	0.000565396	0.0209158
HORVU2Hr1G109370	1.41152	6.17508	11.8771	0.00056828	0.0209742
HORVU4Hr1G057410	-0.80088	7.5145	11.8596	0.00057364	0.0211236
HORVU5Hr1G098440	1.2369	2.40735	11.8372	0.000580589	0.0213307
HORVU6Hr1G038250	2.21353	0.741336	11.8165	0.000587081	0.0215201
ENSRNA049486928	1.59372	0.104471	11.79	0.000595502	0.0217791
HORVU3Hr1G066880	0.914083	3.23569	11.7855	0.000596934	0.021782
HORVU6Hr1G056570	1.00951	6.42904	11.7756	0.000600107	0.0218482
HORVU0Hr1G022070	3.22065	2.47533	11.7252	0.000616611	0.0223984
HORVU6Hr1G016890	-2.97237	5.59016	11.7201	0.000618279	0.0224084
HORVU3Hr1G037170	1.13059	4.00372	11.7022	0.00062426	0.0225274
HORVU3Hr1G006170	0.984769	2.92007	11.7011	0.000624621	0.0225274
HORVU5Hr1G115980	0.906764	3.71846	11.6977	0.000625762	0.0225274
HORVU7Hr1G033470	0.647488	7.46483	11.6767	0.000632884	0.022733
HORVU4Hr1G004800	1.07515	3.26101	11.6681	0.000635799	0.0227868
HORVU4Hr1G050930	-1.48758	4.35801	11.6484	0.000642587	0.0229453
HORVU5Hr1G067810	1.18039	1.76826	11.6447	0.000643849	0.0229453
HORVU3Hr1G026870	-1.08999	5.29913	11.6389	0.000645882	0.0229453
HORVU1Hr1G080320	0.687468	6.1287	11.6387	0.000645924	0.0229453
HORVU2Hr1G112600	0.821271	3.53544	11.6345	0.000647393	0.0229468
HORVU1Hr1G075670	2.05033	2.84475	11.6218	0.000651832	0.0230243
HORVU2Hr1G066820	-0.647519	5.32101	11.6169	0.000653544	0.0230243
HORVU6Hr1G091700	-0.698744	4.62256	11.6141	0.000654523	0.0230243
HORVU4Hr1G070090	0.781616	4.64084	11.6069	0.000657083	0.0230243
HORVU7Hr1G053070	1.31631	1.72749	11.6056	0.000657548	0.0230243
HORVU2Hr1G124300	3.17688	0.339021	11.5922	0.000662287	0.0230243
HORVU3Hr1G050320	1.09851	3.15404	11.5908	0.000662778	0.0230243
HORVU2Hr1G123350	-0.764059	7.37115	11.5884	0.000663659	0.0230243
HORVU2Hr1G093720	-0.740837	4.38366	11.5881	0.000663759	0.0230243
HORVU4Hr1G000120	1.52629	-0.152172	11.5877	0.000663886	0.0230243
HORVU3Hr1G071090	0.636033	5.194	11.581	0.000666286	0.0230578
HORVU2Hr1G086390	0.834126	6.95708	11.5309	0.000684475	0.0236231
HORVU5Hr1G111240	4.5102	-0.316685	11.5232	0.000687321	0.0236231
HORVU6Hr1G062380	3.2835	1.96471	11.5184	0.00068909	0.0236231
HORVU7Hr1G080560	0.69611	5.33116	11.5121	0.00069143	0.0236231
HORVU7Hr1G082850	2.62095	2.36786	11.5111	0.000691825	0.0236231
HORVU5Hr1G027710	-0.639137	5.21848	11.5085	0.000692772	0.0236231
HORVU3Hr1G107290	-0.706153	7.96792	11.5082	0.000692898	0.0236231
HORVU7Hr1G011890	-0.798579	4.36594	11.5019	0.000695241	0.0236529
HORVU5Hr1G012740	-2.44765	0.0253104	11.484	0.000701991	0.0238021
HORVU7Hr1G110990	1.51382	4.51352	11.4812	0.000703051	0.0238021
HORVU2Hr1G063880	0.979093	5.9527	11.4754	0.000705238	0.0238021
HORVU2Hr1G123750	-2.01649	0.145915	11.4746	0.000705543	0.0238021
HORVU3Hr1G095730	3.47816	0.0746671	11.4624	0.000710195	0.0239089
HORVU1Hr1G092110	0.979531	2.83245	11.4117	0.000729827	0.0245185
HORVU1Hr1G052040	-1.12183	9.67019	11.361	0.000750037	0.025145
HORVU7Hr1G075130	2.01116	1.90585	11.3534	0.00075308	0.0251945
HORVU4Hr1G075710	1.18479	7.58094	11.3233	0.000765388	0.0255365
HORVU7Hr1G056430	-0.66675	6.06246	11.319	0.00076717	0.0255365
HORVU2Hr1G004550	3.23174	3.43484	11.3169	0.000768062	0.0255365
HORVU7Hr1G029260	1.75677	0.0583279	11.3023	0.000774129	0.0256851
HORVU2Hr1G090200	2.79371	-0.56412	11.2945	0.000777384	0.0257401
HORVU2Hr1G056440	1.3284	5.23168	11.2779	0.000784336	0.0258507
HORVU3Hr1G116770	-4.38116	0.926693	11.2738	0.000786065	0.0258507
HORVU4Hr1G070370	1.04405	8.41525	11.2725	0.000786644	0.0258507
HORVU3Hr1G106720	1.24334	6.16604	11.2713	0.00078715	0.0258507
HORVU5Hr1G122350	0.964473	5.90043	11.2623	0.000790961	0.0259229
HORVU7Hr1G100130	1.19696	1.47657	11.2457	0.00079806	0.0261024
HORVU3Hr1G110850	-0.721816	5.47129	11.2416	0.000799837	0.0261075
HORVU1Hr1G021140	2.43189	1.01893	11.2304	0.000804677	0.0261745
HORVU6Hr1G027560	1.39736	0.465228	11.2293	0.000805144	0.0261745
HORVU7Hr1G089850	-1.43836	3.12195	11.2209	0.000808811	0.0262013
HORVU6Hr1G033290	-0.913735	6.34673	11.22	0.000809224	0.0262013
HORVU5Hr1G111480	1.19671	5.22862	11.2101	0.000813543	0.0262882
HORVU7Hr1G045290	-0.973129	3.18779	11.2043	0.000816069	0.026317
HORVU4Hr1G041810	0.874469	3.47049	11.1953	0.000820059	0.0263928
HORVU7Hr1G049720	2.07819	0.162723	11.1722	0.000830314	0.0266321
HORVU2Hr1G121050	-1.89002	5.29098	11.1711	0.000830805	0.0266321
HORVU7Hr1G120520	1.18983	1.10122	11.1613	0.000835215	0.0267003
HORVU4Hr1G082020	0.958593	3.69836	11.158	0.000836698	0.0267003
HORVU2Hr1G089310	1.72265	2.75541	11.1553	0.00083791	0.0267003
HORVU1Hr1G091530	-0.883416	5.12943	11.1421	0.000843895	0.0268007
HORVU2Hr1G076320	2.87179	1.92211	11.141	0.00084439	0.0268007
HORVU7Hr1G057460	-1.31359	3.28704	11.1331	0.000848005	0.0268153
HORVU5Hr1G061020	0.804957	3.8745	11.1312	0.000848875	0.0268153
HORVU2Hr1G108050	0.657883	5.71745	11.1291	0.000849851	0.0268153
HORVU1Hr1G077820	-0.612552	5.05365	11.1116	0.000857912	0.0270167
HORVU0Hr1G007360	-1.08417	9.20305	11.1061	0.000860431	0.0270167
HORVU7Hr1G006980	-1.16801	7.96915	11.1043	0.000861271	0.0270167
HORVU3Hr1G066430	0.900582	7.53558	11.0867	0.000869486	0.0272214
HORVU1Hr1G065830	1.11971	2.95046	11.0769	0.000874076	0.0273119
HORVU2Hr1G080370	0.897445	3.86401	11.0565	0.00088378	0.0275616
HORVU5Hr1G053220	-2.34752	0.246366	11.004	0.000909136	0.0282691
HORVU5Hr1G059410	1.94608	2.0689	11.0023	0.000909981	0.0282691
HORVU4Hr1G062950	1.31601	1.39677	10.9965	0.000912841	0.028289
HORVU2Hr1G127100	-0.661886	5.7596	10.9939	0.000914136	0.028289
HORVU2Hr1G004620	3.97262	0.756995	10.9786	0.000921718	0.0284689
HORVU7Hr1G043540	3.44435	2.03366	10.9692	0.000926367	0.0285577
HORVU5Hr1G120210	-0.651493	5.41001	10.9592	0.000931378	0.0286047
HORVU7Hr1G073050	1.61391	4.92873	10.9591	0.000931449	0.0286047
HORVU5Hr1G063590	-2.8207	-0.117108	10.9453	0.000938405	0.0287161
HORVU4Hr1G061120	2.26891	7.06336	10.9448	0.000938645	0.0287161
HORVU2Hr1G095870	-1.28897	3.8176	10.9304	0.000945979	0.0288856
HORVU3Hr1G086050	0.897947	6.62848	10.9244	0.000949038	0.0289241
HORVU6Hr1G001950	1.44911	0.448444	10.909	0.000956975	0.0291108
HORVU3Hr1G116790	-1.35721	8.07594	10.8951	0.000964211	0.0292336
HORVU7Hr1G055100	-0.728888	7.2564	10.8912	0.000966237	0.0292336
HORVU7Hr1G108780	0.789528	4.85958	10.8833	0.000970339	0.0292336
HORVU2Hr1G106110	0.986691	4.52133	10.8827	0.00097065	0.0292336
HORVU7Hr1G002820	1.32753	5.36159	10.8806	0.000971749	0.0292336
HORVU5Hr1G074370	1.06185	2.15001	10.8803	0.000971909	0.0292336
HORVU2Hr1G101990	2.78306	2.68662	10.8593	0.000982995	0.0294844
HORVU7Hr1G037910	1.78657	4.08878	10.8576	0.000983914	0.0294844
HORVU2Hr1G071960	-0.748297	7.90368	10.8377	0.000994547	0.0296696
HORVU2Hr1G121320	-1.59749	-0.0668762	10.8349	0.000996036	0.0296696
HORVU1Hr1G084690	1.32701	2.30268	10.8329	0.00099711	0.0296696
HORVU2Hr1G017960	-0.798314	4.64674	10.8323	0.000997468	0.0296696
HORVU7Hr1G045140	1.08696	3.85798	10.7918	0.00101952	0.0302695
HORVU6Hr1G020420	0.764254	5.12885	10.7817	0.0010251	0.0303791
HORVU5Hr1G121940	1.40102	1.68536	10.7666	0.00103349	0.0305714
HORVU1Hr1G078380	-2.72248	6.75243	10.7609	0.00103669	0.0306098
HORVU2Hr1G030880	0.781222	7.53691	10.7501	0.00104275	0.0306515
HORVU6Hr1G091860	1.27104	5.32462	10.7475	0.00104419	0.0306515
HORVU0Hr1G017790	-2.10245	1.44931	10.7453	0.00104542	0.0306515
HORVU7Hr1G029330	-0.62451	5.01622	10.7448	0.00104572	0.0306515
HORVU2Hr1G034370	1.69528	1.68186	10.7357	0.00105088	0.0307468
HORVU5Hr1G048300	-1.10495	6.26758	10.7269	0.00105588	0.0308369
HORVU2Hr1G106410	-0.887371	6.99331	10.7204	0.00105959	0.0308894
HORVU7Hr1G054670	0.923578	7.17463	10.7098	0.0010657	0.0310113
HORVU2Hr1G124880	-0.786431	8.32285	10.7051	0.00106841	0.0310341
HORVU2Hr1G100980	-0.833125	4.9568	10.6963	0.00107347	0.0311249
HORVU7Hr1G035190	2.50062	0.123101	10.6844	0.00108044	0.0312705
HORVU7Hr1G107630	2.32957	-0.495274	10.6598	0.00109492	0.0316327
HORVU6Hr1G085760	2.31359	1.13691	10.6554	0.00109747	0.0316496
HORVU6Hr1G063490	1.08476	7.69797	10.6303	0.00111248	0.0319824
HORVU2Hr1G113100	1.14107	1.94708	10.6295	0.00111298	0.0319824
HORVU4Hr1G073580	0.639722	4.73036	10.5958	0.00113342	0.0325003
HORVU6Hr1G094420	-1.59134	-0.304307	10.5932	0.00113505	0.0325003
HORVU3Hr1G104090	0.980134	3.07644	10.581	0.00114254	0.0326079
HORVU4Hr1G001170	1.21789	6.16529	10.5758	0.00114575	0.0326079
HORVU2Hr1G090610	-0.663602	7.54858	10.5729	0.00114758	0.0326079
HORVU2Hr1G096230	1.69554	0.266853	10.5729	0.00114758	0.0326079
HORVU7Hr1G101110	-0.902431	4.47648	10.5707	0.00114894	0.0326079
HORVU4Hr1G083410	0.765964	4.95236	10.5553	0.00115855	0.0328229
HORVU5Hr1G062450	-2.44875	0.363038	10.5507	0.00116145	0.0328472
HORVU7Hr1G092560	0.813009	4.40291	10.5159	0.00118354	0.0334131
HORVU5Hr1G080540	-0.653272	5.68584	10.5125	0.0011857	0.0334155
HORVU5Hr1G055560	-0.734637	5.51664	10.4958	0.00119649	0.0336607
HORVU3Hr1G081420	-0.661269	5.02895	10.4826	0.00120505	0.0338425
HORVU3Hr1G062590	0.929655	6.9254	10.467	0.00121529	0.0340703
HORVU3Hr1G016860	2.86373	0.436144	10.4517	0.00122534	0.0342924
HORVU1Hr1G058540	1.21303	2.3135	10.4331	0.00123774	0.0345794
HORVU5Hr1G059140	-0.850755	6.03619	10.4282	0.00124107	0.0346123
HORVU5Hr1G116380	1.13865	1.58894	10.4213	0.00124571	0.0346236
HORVU1Hr1G010120	4.99854	2.01592	10.4197	0.00124675	0.0346236
HORVU7Hr1G080850	2.23217	1.49993	10.412	0.00125202	0.0346236
HORVU5Hr1G062290	2.38787	4.97363	10.4117	0.00125218	0.0346236
HORVU2Hr1G083490	-1.28219	1.89981	10.4104	0.00125308	0.0346236
HORVU5Hr1G081090	0.781104	5.90329	10.4085	0.00125439	0.0346236
HORVU1Hr1G022570	0.818625	7.74235	10.3978	0.00126164	0.0347642
HORVU7Hr1G043690	1.48632	1.09438	10.3872	0.00126895	0.0349059
HORVU2Hr1G105510	1.49094	2.25973	10.371	0.00128013	0.0351533
HORVU6Hr1G012440	0.951242	3.76102	10.3622	0.00128619	0.035197
HORVU7Hr1G047910	-2.54233	1.8211	10.3606	0.00128734	0.035197
HORVU4Hr1G081590	1.72865	1.11992	10.3592	0.00128828	0.035197
HORVU3Hr1G092680	1.3626	6.85733	10.3316	0.00130775	0.0356196
HORVU2Hr1G088480	0.804196	4.52203	10.331	0.00130818	0.0356196
HORVU4Hr1G076490	1.0155	2.4715	10.3218	0.00131469	0.0356945
HORVU1Hr1G066100	1.78276	1.20106	10.3208	0.00131537	0.0356945
HORVU1Hr1G073150	1.05729	1.96846	10.3176	0.00131768	0.0356972
HORVU3Hr1G091020	2.72763	0.487653	10.2948	0.00133402	0.0360792
HORVU2Hr1G016990	0.778017	3.47677	10.2883	0.00133875	0.0361462
HORVU4Hr1G001250	3.73244	2.48247	10.2819	0.00134338	0.0362106
HORVU5Hr1G082420	-1.45897	11.9425	10.2712	0.00135125	0.0363619
HORVU5Hr1G114230	2.49283	0.430641	10.2666	0.00135457	0.0363901
HORVU3Hr1G030520	1.37106	2.37367	10.2625	0.00135761	0.036411
HORVU6Hr1G075640	-0.679681	7.00976	10.255	0.00136316	0.0364758
HORVU3Hr1G085890	2.14161	6.89086	10.2531	0.00136456	0.0364758
HORVU3Hr1G070610	1.31277	3.9226	10.2388	0.00137519	0.0366456
HORVU6Hr1G017220	0.811203	4.05708	10.2359	0.00137737	0.0366456
HORVU0Hr1G038250	-1.44781	0.222491	10.2326	0.00137978	0.0366456
HORVU5Hr1G004340	0.889764	4.13922	10.2291	0.0013824	0.0366456
HORVU5Hr1G109360	-2.28387	2.75677	10.2274	0.00138368	0.0366456
HORVU5Hr1G046250	-0.83533	6.33949	10.224	0.00138625	0.0366456
HORVU3Hr1G006140	1.88664	0.865706	10.2232	0.00138685	0.0366456
HORVU7Hr1G057330	-1.36644	1.58894	10.219	0.00138998	0.036668
HORVU7Hr1G096170	0.722467	4.02837	10.2004	0.0014041	0.0369452
HORVU5Hr1G080300	-1.86301	3.56185	10.1991	0.00140507	0.0369452
HORVU7Hr1G115460	0.745566	5.5108	10.1915	0.00141088	0.0370374
HORVU2Hr1G097940	2.17349	1.3548	10.1869	0.0014144	0.0370693
HORVU4Hr1G002020	-0.985713	4.64887	10.154	0.00143986	0.0376197
HORVU1Hr1G038680	1.30985	4.9676	10.1538	0.00144008	0.0376197
HORVU3Hr1G115020	0.857975	3.47598	10.1464	0.00144582	0.0377085
HORVU4Hr1G083360	0.595336	6.04133	10.1305	0.00145834	0.0379708
HORVU5Hr1G024340	-0.791202	6.05682	10.1246	0.00146307	0.0379708
HORVU2Hr1G035060	1.35752	3.09351	10.1219	0.00146515	0.0379708
HORVU5Hr1G109260	-2.18412	7.16201	10.1217	0.00146532	0.0379708
HORVU3Hr1G089360	-0.886722	2.90616	10.1165	0.00146947	0.0380172
HORVU2Hr1G041430	-0.84088	4.47865	10.1096	0.00147503	0.0380998
HORVU5Hr1G093270	1.26621	3.67846	10.0974	0.00148477	0.03829
HORVU7Hr1G073460	1.0432	8.01442	10.0879	0.00149244	0.0384263
HORVU6Hr1G025120	-0.665832	5.88528	10.0823	0.00149702	0.0384285
HORVU4Hr1G060370	1.95933	4.2889	10.0819	0.00149731	0.0384285
HORVU5Hr1G073960	2.13072	-0.124906	10.0694	0.00150751	0.0386286
HORVU0Hr1G037420	-1.01361	3.23567	10.061	0.00151444	0.0387446
HORVU3Hr1G090760	-0.776982	6.04209	10.0541	0.00152007	0.0387832
HORVU3Hr1G055870	0.845773	5.09045	10.0533	0.00152077	0.0387832
HORVU5Hr1G105040	1.20629	3.30306	10.0492	0.00152416	0.0388082
HORVU7Hr1G037600	-1.13272	5.95172	10.0408	0.00153114	0.0389244
HORVU3Hr1G064320	1.80681	0.149353	10.0246	0.00154463	0.0392055
HORVU4Hr1G027740	0.991257	3.39305	10.0185	0.00154972	0.0392725
HORVU7Hr1G073090	-0.74672	4.1257	10.0154	0.00155236	0.0392777
HORVU5Hr1G120650	-0.792387	7.92746	10.0033	0.00156257	0.0394739
HORVU3Hr1G049610	0.68575	6.78962	9.9895	0.00157435	0.0397091
HORVU7Hr1G025000	1.06509	5.72605	9.96704	0.00159367	0.0401103
HORVU1Hr1G015820	0.856424	3.36904	9.96238	0.00159771	0.0401103
HORVU1Hr1G092440	-0.984219	8.30854	9.96236	0.00159773	0.0401103
HORVU2Hr1G043920	-0.727511	4.45827	9.95863	0.00160097	0.0401118
HORVU1Hr1G082660	1.58523	2.76819	9.95655	0.00160278	0.0401118
HORVU1Hr1G089460	-2.75892	2.90524	9.9389	0.00161822	0.0404165
HORVU4Hr1G064790	2.08395	0.119161	9.9368	0.00162007	0.0404165
HORVU4Hr1G047580	0.873573	4.56228	9.9317	0.00162457	0.0404165
HORVU6Hr1G059850	-0.763506	7.28489	9.93121	0.001625	0.0404165
HORVU3Hr1G038950	0.718987	6.39166	9.92604	0.00162956	0.0404675
HORVU2Hr1G028230	-0.8309	5.69857	9.92209	0.00163306	0.0404919
HORVU5Hr1G097100	0.993575	2.94041	9.91062	0.00164327	0.0406602
HORVU3Hr1G088970	1.57961	6.41699	9.9088	0.0016449	0.0406602
HORVU4Hr1G054920	1.02239	5.91323	9.90191	0.00165107	0.04075
HORVU5Hr1G028550	-0.945058	7.69263	9.89438	0.00165785	0.0408546
HORVU1Hr1G071910	-1.19671	5.2592	9.87619	0.00167431	0.0411973
HORVU6Hr1G067740	3.1692	0.0798626	9.85498	0.00169373	0.0416115
ENSRNA049486929	1.41339	-0.0454565	9.8518	0.00169666	0.0416199
HORVU6Hr1G048850	1.21904	2.17634	9.84607	0.00170195	0.0416775
HORVU7Hr1G073520	0.994972	2.87974	9.84365	0.00170419	0.0416775
HORVU2Hr1G087890	-2.02717	-0.444475	9.82191	0.00172445	0.042109
HORVU5Hr1G002120	1.01418	2.75224	9.80632	0.00173913	0.0423912
HORVU2Hr1G033610	2.42	3.52275	9.80406	0.00174127	0.0423912
HORVU3Hr1G070690	0.866239	5.354	9.80099	0.00174418	0.0423978
HORVU2Hr1G025750	1.37906	2.16179	9.7917	0.00175301	0.0425482
HORVU6Hr1G090070	1.14083	6.46301	9.78656	0.00175792	0.0426032
HORVU2Hr1G063900	1.67176	0.00824681	9.77979	0.00176441	0.042696
HORVU2Hr1G064730	-2.72009	4.18023	9.77403	0.00176994	0.0427656
HORVU3Hr1G060150	-0.690598	6.26907	9.76439	0.00177924	0.0429259
HORVU3Hr1G105870	-1.32906	3.16061	9.76034	0.00178317	0.0429563
HORVU6Hr1G056850	1.11507	2.36565	9.74973	0.00179349	0.0431404
HORVU3Hr1G068200	-1.40671	4.58939	9.74388	0.00179921	0.0432132
HORVU7Hr1G041410	0.902903	3.0055	9.74047	0.00180255	0.0432289
HORVU7Hr1G112240	0.674409	4.51921	9.73027	0.00181258	0.0434048
HORVU3Hr1G026920	-0.973673	10.8439	9.72391	0.00181887	0.0434356
HORVU4Hr1G065560	-0.79936	4.55992	9.72017	0.00182256	0.0434356
HORVU2Hr1G115180	1.8883	1.09884	9.71841	0.00182431	0.0434356
HORVU2Hr1G120340	1.50082	1.443	9.71702	0.0018257	0.0434356
HORVU5Hr1G036630	0.78769	7.17604	9.71534	0.00182736	0.0434356
HORVU7Hr1G035340	0.745357	5.11277	9.71139	0.0018313	0.043465
HORVU1Hr1G037760	0.938785	5.25424	9.69841	0.00184427	0.0437085
HORVU6Hr1G016120	-0.67318	5.18162	9.69499	0.00184771	0.0437255
HORVU0Hr1G011940	0.913005	6.83654	9.67935	0.00186351	0.0440346
HORVU3Hr1G114240	1.60031	1.93544	9.67408	0.00186886	0.0440964
HORVU7Hr1G104220	0.798865	7.48002	9.66861	0.00187444	0.0441443
HORVU3Hr1G105360	1.17002	4.06853	9.6667	0.00187638	0.0441443
HORVU3Hr1G072230	0.682099	5.91226	9.66279	0.00188038	0.0441585
HORVU4Hr1G062730	1.55081	0.289068	9.66075	0.00188247	0.0441585
HORVU7Hr1G100570	-1.36446	3.03595	9.64153	0.00190227	0.044558
HORVU4Hr1G054060	0.854852	5.22744	9.6361	0.00190789	0.0446248
HORVU3Hr1G069590	1.22899	3.42782	9.60801	0.0019373	0.0452348
HORVU2Hr1G085270	1.91871	3.06415	9.60584	0.0019396	0.0452348
HORVU2Hr1G049700	-0.631413	9.24203	9.59642	0.00194957	0.0453612
HORVU4Hr1G004150	1.0366	2.75402	9.59305	0.00195316	0.0453612
HORVU5Hr1G047730	0.77329	8.54869	9.59275	0.00195348	0.0453612
HORVU2Hr1G045500	1.80069	-0.123213	9.58956	0.00195687	0.0453746
HORVU7Hr1G081910	1.31541	4.80677	9.57419	0.00197332	0.0456602
HORVU5Hr1G006830	1.55418	2.12703	9.57275	0.00197486	0.0456602
HORVU5Hr1G040000	-0.822167	4.69378	9.56563	0.00198254	0.0457718
HORVU6Hr1G031360	-0.765303	4.86813	9.56	0.00198863	0.0458467
HORVU6Hr1G020570	-0.93527	6.85913	9.55286	0.00199638	0.0459595
HORVU2Hr1G120330	0.858338	3.30541	9.54352	0.00200656	0.046128
HORVU1Hr1G002100	-2.29104	1.21953	9.53478	0.00201615	0.0462669
HORVU4Hr1G014900	-1.29989	1.87342	9.53277	0.00201835	0.0462669
HORVU2Hr1G034420	-1.42432	3.96547	9.52958	0.00202187	0.0462815
HORVU2Hr1G107630	1.21564	3.61639	9.52299	0.00202913	0.0463818
HORVU1Hr1G004200	1.03462	2.98264	9.51418	0.0020389	0.046539
HORVU3Hr1G077980	1.08701	2.65702	9.49434	0.00206107	0.0469483
HORVU5Hr1G123120	1.47744	3.12613	9.49056	0.00206531	0.0469483
HORVU5Hr1G063940	1.86346	6.74888	9.48834	0.00206782	0.0469483
HORVU4Hr1G015040	-1.39462	0.262371	9.48773	0.0020685	0.0469483
HORVU3Hr1G053380	0.837867	7.91971	9.4792	0.00207814	0.0471007
HORVU3Hr1G085930	1.69908	4.54426	9.46802	0.00209084	0.0473219
HORVU4Hr1G062570	1.11963	1.39262	9.45636	0.00210418	0.0475569
HORVU2Hr1G089270	1.18469	4.3055	9.45141	0.00210986	0.0476184
HORVU2Hr1G031940	0.741017	6.14151	9.44768	0.00211416	0.0476485
HORVU5Hr1G050560	0.637405	8.55445	9.43833	0.00212497	0.0478252
ENSRNA049489352	-1.33412	0.984531	9.43497	0.00212886	0.0478413
HORVU1Hr1G077470	-0.600267	6.82422	9.43259	0.00213163	0.0478413
HORVU5Hr1G023160	-1.33028	3.80646	9.42481	0.00214069	0.0479776
HORVU1Hr1G077760	-1.17083	3.23101	9.40621	0.00216252	0.0483302
HORVU2Hr1G115360	1.75179	2.52463	9.40449	0.00216455	0.0483302
HORVU7Hr1G002060	1.09864	7.416	9.40375	0.00216543	0.0483302
HORVU7Hr1G113710	-1.59404	-0.218232	9.39766	0.00217262	0.0483975
HORVU7Hr1G116640	-0.70743	8.93076	9.39611	0.00217446	0.0483975
HORVU5Hr1G104800	3.25683	1.00864	9.36993	0.00220574	0.0490259
HORVU2Hr1G072210	1.11534	3.65134	9.36705	0.00220921	0.0490353
HORVU7Hr1G068560	2.3298	2.01903	9.35572	0.00222291	0.0492714
HORVU7Hr1G059460	0.826174	6.14941	9.34804	0.00223224	0.0493548
HORVU2Hr1G108320	0.763177	3.52975	9.34627	0.0022344	0.0493548
HORVU1Hr1G094180	-0.895453	3.8091	9.34506	0.00223587	0.0493548
HORVU4Hr1G015640	2.75185	2.55819	9.33952	0.00224264	0.0494364
HORVU5Hr1G117910	1.25289	4.78993	9.33261	0.00225112	0.0495254
HORVU5Hr1G051530	0.713954	5.26888	9.331	0.0022531	0.0495254
HORVU2Hr1G104100	-5.30443	1.41301	9.3279	0.00225691	0.0495254
HORVU6Hr1G081950	1.66249	0.0730659	9.32621	0.00225899	0.0495254
HORVU7Hr1G084610	1.54424	2.33596	9.3174	0.00226988	0.0496965
HORVU6Hr1G087800	0.769913	4.63378	9.30255	0.00228836	0.0500272
HORVU2Hr1G020250	1.4618	2.46157	9.30027	0.0022912	0.0500272
HORVU3Hr1G060800	0.694096	7.40232	9.29425	0.00229874	0.0501238
HORVU4Hr1G056820	1.26181	3.99549	9.28138	0.00231495	0.0503772
HORVU3Hr1G093310	0.618518	4.86425	9.28006	0.00231662	0.0503772
HORVU7Hr1G047080	-0.786465	4.81921	9.27538	0.00232255	0.0504378
HORVU4Hr1G037800	1.01639	5.44013	9.27019	0.00232914	0.0504584
HORVU2Hr1G120260	2.44844	4.87713	9.26969	0.00232977	0.0504584
HORVU5Hr1G118040	1.14283	1.08179	9.26705	0.00233313	0.0504634
HORVU3Hr1G089380	-0.888851	3.35066	9.26346	0.00233771	0.0504944
HORVU5Hr1G022690	2.58942	0.576731	9.2401	0.00236773	0.051072
HORVU7Hr1G054390	-1.23242	1.36441	9.23773	0.00237079	0.051072
HORVU1Hr1G076060	1.10178	3.86654	9.23261	0.00237743	0.0511464
HORVU2Hr1G089630	1.20747	1.89763	9.22743	0.00238416	0.0512228
HORVU2Hr1G037550	-1.32175	0.571129	9.21449	0.00240107	0.0514705
HORVU7Hr1G053480	1.31631	0.893473	9.21372	0.00240208	0.0514705
HORVU6Hr1G035640	-0.5796	6.01147	9.20791	0.00240971	0.0515652
HORVU4Hr1G059340	0.843407	3.42621	9.20235	0.00241704	0.0516534
HORVU2Hr1G115920	0.910237	3.72063	9.18682	0.00243764	0.0520218
HORVU2Hr1G042240	1.97439	2.75766	9.18449	0.00244075	0.0520218
HORVU2Hr1G083100	-0.982652	5.83073	9.18034	0.00244628	0.0520581
HORVU1Hr1G073760	-1.03258	3.77441	9.17837	0.00244892	0.0520581
HORVU3Hr1G060730	-0.691092	6.11211	9.17112	0.00245864	0.0521959
HORVU5Hr1G119790	-0.713413	8.91422	9.1643	0.00246782	0.0522945
HORVU2Hr1G033450	0.807239	4.01927	9.16284	0.00246979	0.0522945
HORVU1Hr1G012470	0.60781	4.97692	9.15455	0.00248101	0.052463
HORVU3Hr1G037780	-0.67744	6.44049	9.15197	0.0024845	0.0524679
HORVU4Hr1G071270	0.724307	5.98465	9.14564	0.00249311	0.0525162
HORVU2Hr1G109910	0.864959	3.59023	9.14549	0.00249331	0.0525162
HORVU0Hr1G019300	3.8049	2.89575	9.14151	0.00249874	0.05254
HORVU6Hr1G005390	0.939434	6.17288	9.13866	0.00250264	0.05254
HORVU4Hr1G062310	0.98014	3.27624	9.1375	0.00250423	0.05254
HORVU0Hr1G016720	0.854579	2.58245	9.13006	0.00251444	0.0526854
HORVU5Hr1G124650	3.19294	3.69156	9.12488	0.00252156	0.0527659
HORVU5Hr1G085680	-1.30027	3.58273	9.12067	0.00252737	0.0528188
HORVU1Hr1G005370	1.12369	0.979628	9.11463	0.00253574	0.0528761
HORVU3Hr1G092770	0.831129	2.70873	9.11394	0.00253668	0.0528761
HORVU7Hr1G116270	1.31576	1.14392	9.10944	0.00254294	0.0529378
HORVU7Hr1G087760	1.42918	0.550497	9.10562	0.00254825	0.0529799
HORVU6Hr1G009570	-2.12779	0.408382	9.09833	0.00255842	0.0531228
HORVU6Hr1G002410	-4.31676	-0.762721	9.07957	0.00258481	0.0536015
HORVU6Hr1G072940	0.853679	4.92778	9.0714	0.00259639	0.0537323
HORVU3Hr1G099430	1.14927	3.14408	9.0704	0.0025978	0.0537323
HORVU6Hr1G035160	-0.696042	5.97258	9.05556	0.00261898	0.0541009
HORVU7Hr1G107720	-0.633765	6.40347	9.05177	0.00262441	0.0541437
HORVU5Hr1G030500	-0.699221	6.43298	9.02337	0.0026655	0.0548486
HORVU2Hr1G027150	1.15457	1.33796	9.02249	0.00266678	0.0548486
HORVU6Hr1G055540	1.89061	-0.000401282	9.01712	0.00267463	0.0548486
HORVU1Hr1G080480	0.65569	4.60696	9.01653	0.00267548	0.0548486
HORVU1Hr1G080080	1.77225	2.50571	9.01644	0.00267562	0.0548486
HORVU5Hr1G106850	1.02236	4.51285	9.00583	0.0026912	0.0550977
HORVU2Hr1G123270	1.24913	4.80591	8.99553	0.00270641	0.0553241
HORVU1Hr1G048860	-0.717564	5.90353	8.99297	0.0027102	0.0553241
HORVU2Hr1G083780	0.677169	5.61545	8.98908	0.00271597	0.0553241
HORVU5Hr1G115230	0.702044	5.89641	8.98906	0.00271601	0.0553241
HORVU5Hr1G084160	1.31676	1.10495	8.9863	0.00272012	0.0553377
HORVU4Hr1G077240	0.927261	6.95945	8.96613	0.0027503	0.0558811
HORVU6Hr1G075170	-0.629486	6.45269	8.96269	0.00275548	0.0559158
HORVU0Hr1G004700	0.89533	7.06992	8.95742	0.00276345	0.0559705
HORVU4Hr1G061680	-1.04177	5.5126	8.95631	0.00276514	0.0559705
HORVU4Hr1G015420	0.620088	6.09833	8.95225	0.00277129	0.0560245
HORVU3Hr1G073100	-0.57099	6.12067	8.94029	0.00278948	0.0563119
HORVU2Hr1G127120	1.90141	-0.133669	8.93832	0.0027925	0.0563119
HORVU4Hr1G065920	-0.975656	6.96171	8.93046	0.00280454	0.0564838
HORVU6Hr1G020750	1.56174	-0.435577	8.92634	0.00281087	0.0564921
HORVU7Hr1G057640	0.747504	4.85005	8.92563	0.00281197	0.0564921
HORVU6Hr1G011860	2.50803	1.59418	8.90742	0.00284015	0.0569871
HORVU1Hr1G088920	-2.4642	3.65025	8.90476	0.00284429	0.0569991
HORVU2Hr1G078350	0.613337	5.7456	8.88925	0.00286854	0.0573437
HORVU1Hr1G083710	1.01931	5.34434	8.88921	0.00286861	0.0573437
HORVU5Hr1G122860	-1.73976	1.66693	8.88558	0.00287432	0.0573866
HORVU5Hr1G028810	1.46398	0.516787	8.8788	0.002885	0.0574947
HORVU2Hr1G020180	1.57266	-0.470437	8.87762	0.00288688	0.0574947
HORVU7Hr1G098330	-3.5456	-0.417479	8.85809	0.00291793	0.0580412
HORVU0Hr1G012190	-0.71558	7.83037	8.84882	0.00293279	0.0582541
HORVU1Hr1G025390	-0.771397	5.97579	8.8469	0.00293588	0.0582541
HORVU2Hr1G114640	0.940594	2.92257	8.84116	0.00294511	0.058293
HORVU7Hr1G037080	1.13437	4.79026	8.83824	0.00294984	0.058293
HORVU6Hr1G061270	-1.20186	5.37805	8.83356	0.00295741	0.058293
HORVU2Hr1G007570	2.01461	4.28528	8.83346	0.00295757	0.058293
HORVU5Hr1G040970	-0.652853	10.3622	8.82965	0.00296376	0.058293
HORVU3Hr1G086190	-0.939306	5.53564	8.82684	0.00296832	0.058293
HORVU7Hr1G115670	1.86044	4.26829	8.82598	0.00296972	0.058293
HORVU3Hr1G030550	1.20792	1.58293	8.82511	0.00297114	0.058293
HORVU7Hr1G104490	-2.01189	7.46927	8.82406	0.00297284	0.058293
HORVU1Hr1G081320	0.673131	4.45184	8.82331	0.00297406	0.058293
HORVU2Hr1G016650	0.667641	6.23531	8.79935	0.00301337	0.0589917
HORVU1Hr1G089730	1.39325	0.691918	8.79277	0.00302427	0.059133
HORVU6Hr1G058670	1.29823	3.76728	8.7836	0.0030395	0.0593588
HORVU5Hr1G007480	-1.1387	1.61499	8.77462	0.0030545	0.0595794
HORVU5Hr1G051870	-0.648126	8.92011	8.76484	0.00307093	0.0597531
HORVU7Hr1G085980	-0.540384	7.02044	8.76055	0.00307817	0.0597531
HORVU1Hr1G076350	-1.083	7.81356	8.76027	0.00307863	0.0597531
HORVU6Hr1G066810	-0.670666	4.89157	8.75945	0.00308001	0.0597531
HORVU1Hr1G084350	0.647364	4.34083	8.75829	0.00308197	0.0597531
HORVU4Hr1G055230	0.788373	7.78186	8.75282	0.00309123	0.0598605
HORVU7Hr1G104350	1.73976	1.22773	8.74714	0.00310087	0.0599751
HORVU5Hr1G010440	0.850891	4.02522	8.73978	0.00311341	0.0600768
HORVU4Hr1G061170	-0.571047	5.31617	8.73967	0.0031136	0.0600768
HORVU5Hr1G064120	-0.614615	5.06183	8.72911	0.00313169	0.0603534
HORVU2Hr1G001150	2.12326	1.1319	8.7222	0.00314359	0.0605103
HORVU4Hr1G055300	1.36737	0.8621	8.7158	0.00315464	0.0606506
HORVU1Hr1G093180	-0.827313	4.35492	8.7122	0.00316087	0.0606977
HORVU1Hr1G080300	2.39925	3.59181	8.68179	0.00321404	0.0615738
HORVU2Hr1G116090	0.607923	5.80613	8.68023	0.0032168	0.0615738
HORVU3Hr1G067060	0.577492	5.40843	8.67957	0.00321797	0.0615738
HORVU2Hr1G081210	-0.834022	3.59898	8.67346	0.00322877	0.0616801
HORVU1Hr1G036040	0.763567	4.25068	8.66904	0.00323662	0.0616801
HORVU5Hr1G119230	-1.31207	0.486786	8.66896	0.00323675	0.0616801
HORVU2Hr1G119090	1.63811	1.00429	8.6663	0.00324148	0.0616801
HORVU7Hr1G031850	1.1789	5.67777	8.66538	0.00324313	0.0616801
HORVU6Hr1G088680	1.10181	4.36143	8.66229	0.00324862	0.0616801
HORVU2Hr1G125520	1.40712	4.72456	8.66132	0.00325036	0.0616801
HORVU6Hr1G079660	0.945163	3.0685	8.65857	0.00325526	0.0617004
HORVU1Hr1G092950	0.542869	5.45188	8.64999	0.00327064	0.0619189
HORVU5Hr1G091790	1.10359	1.73902	8.64509	0.00327943	0.0620125
HORVU4Hr1G023530	0.780828	5.72907	8.64122	0.00328642	0.0620716
HORVU1Hr1G061090	-0.625284	6.51531	8.6326	0.00330201	0.062293
HORVU4Hr1G009870	0.727367	3.19095	8.62868	0.00330912	0.062354
HORVU4Hr1G015450	-0.663569	7.20066	8.62208	0.00332113	0.0625071
HORVU2Hr1G089160	0.799568	3.50555	8.60926	0.00334458	0.062875
HORVU5Hr1G080980	-0.744619	8.55043	8.60293	0.00335623	0.0630203
HORVU1Hr1G008160	-1.19742	0.520234	8.60045	0.0033608	0.0630326
HORVU1Hr1G029870	0.7414	6.93765	8.59163	0.00337712	0.063182
HORVU3Hr1G113080	0.589871	4.83193	8.59105	0.0033782	0.063182
HORVU3Hr1G007280	-0.756017	6.30319	8.58849	0.00338295	0.063182
HORVU6Hr1G072740	-0.727456	8.83992	8.58767	0.00338447	0.063182
HORVU6Hr1G085710	-0.817841	3.89819	8.5814	0.00339614	0.0633264
HORVU3Hr1G087380	0.87464	6.97724	8.57177	0.00341416	0.0635634
HORVU1Hr1G049280	2.76281	2.84876	8.57038	0.00341675	0.0635634
HORVU2Hr1G113260	-0.93083	6.76754	8.56662	0.00342382	0.0636214
HORVU1Hr1G038890	0.874037	6.93866	8.55325	0.00344907	0.0639644
HORVU0Hr1G015950	1.05029	3.46604	8.55153	0.00345233	0.0639644
HORVU7Hr1G050170	1.01537	6.01218	8.55053	0.00345421	0.0639644
HORVU6Hr1G057570	0.855703	3.37279	8.54519	0.00346437	0.0640789
HORVU0Hr1G004480	0.901698	5.01385	8.53147	0.00349057	0.0644894
HORVU1Hr1G044200	-2.28087	0.379699	8.52544	0.00350216	0.0645699
HORVU2Hr1G043020	-0.578799	5.73705	8.52503	0.00350295	0.0645699
HORVU2Hr1G068120	0.999293	7.37473	8.51731	0.00351784	0.0646781
HORVU7Hr1G108490	2.77642	3.19487	8.51714	0.00351817	0.0646781
HORVU4Hr1G011250	-0.650833	4.95688	8.51574	0.00352088	0.0646781
HORVU7Hr1G087490	-0.617329	6.81935	8.51278	0.00352661	0.0647094
HORVU2Hr1G099020	1.30755	2.00533	8.51001	0.00353198	0.0647343
HORVU1Hr1G092680	4.7027	-0.680229	8.49802	0.00355533	0.0650879
HORVU3Hr1G086930	0.851651	7.31565	8.4946	0.00356202	0.0651364
HORVU1Hr1G084370	0.625786	4.8673	8.48987	0.00357129	0.0652266
HORVU4Hr1G081670	0.548231	6.60423	8.4876	0.00357576	0.0652266
HORVU2Hr1G103760	-0.682827	6.63054	8.4839	0.00358303	0.0652266
HORVU6Hr1G090380	-0.64624	4.76126	8.48383	0.00358317	0.0652266
HORVU0Hr1G017960	-1.98408	0.316741	8.47509	0.00360042	0.0654666
HORVU2Hr1G080100	1.33399	0.429448	8.47191	0.00360672	0.0655071
HORVU5Hr1G021730	0.899039	7.38803	8.4684	0.00361369	0.0655597
HORVU6Hr1G009500	-1.01173	2.71017	8.46262	0.00362519	0.0656524
HORVU4Hr1G008610	0.89924	2.15748	8.46174	0.00362696	0.0656524
HORVU7Hr1G049400	-0.719842	5.32526	8.4548	0.00364082	0.0656527
HORVU1Hr1G034470	-0.580865	8.98007	8.45372	0.00364297	0.0656527
HORVU4Hr1G017680	-0.766076	8.10045	8.45367	0.00364307	0.0656527
HORVU5Hr1G076100	-0.659189	5.07878	8.45356	0.00364329	0.0656527
HORVU1Hr1G024060	0.766903	3.34479	8.44891	0.00365263	0.0657473
HORVU3Hr1G005560	0.754921	4.40342	8.44186	0.0036668	0.0658616
HORVU3Hr1G053610	-1.83457	0.579802	8.44168	0.00366716	0.0658616
HORVU3Hr1G083290	0.644466	4.73548	8.42905	0.00369272	0.0662467
HORVU7Hr1G079810	-1.48104	0.120838	8.4267	0.00369751	0.0662588
HORVU2Hr1G004720	2.29756	1.45743	8.41822	0.00371479	0.0664214
HORVU7Hr1G059360	-1.38036	-0.134497	8.4182	0.00371484	0.0664214
HORVU2Hr1G102380	1.9374	-0.128203	8.41572	0.00371991	0.0664381
HORVU5Hr1G083170	-0.597053	4.28711	8.40597	0.00373991	0.0667213
HORVU2Hr1G101920	2.65819	1.35549	8.40146	0.0037492	0.066813
HORVU3Hr1G062700	-0.788499	6.83967	8.39877	0.00375475	0.0668379
HORVU4Hr1G079620	3.83753	0.776067	8.39534	0.00376184	0.0668901
HORVU5Hr1G113490	-1.20805	0.29585	8.39217	0.00376841	0.0669329
HORVU7Hr1G097250	-0.71017	7.70348	8.38595	0.00378132	0.0670882
HORVU7Hr1G047700	0.613734	7.05865	8.38157	0.00379045	0.0671761
HORVU4Hr1G088840	0.755052	4.37702	8.36882	0.00381714	0.0674897
HORVU7Hr1G025800	-1.78692	3.21446	8.36775	0.00381938	0.0674897
HORVU5Hr1G048830	0.801503	7.20356	8.36711	0.00382073	0.0674897
HORVU4Hr1G087570	1.02586	2.52734	8.35913	0.00383753	0.0677123
HORVU7Hr1G109340	-0.565068	6.9416	8.35403	0.00384833	0.0677952
HORVU1Hr1G071440	-0.906719	4.91717	8.35293	0.00385066	0.0677952
HORVU1Hr1G004720	-1.28887	3.76782	8.34956	0.00385781	0.0678469
HORVU5Hr1G114070	1.1961	2.5676	8.34292	0.00387192	0.0679816
HORVU0Hr1G000200	-0.72381	9.2269	8.33871	0.00388091	0.0679816
HORVU7Hr1G030860	1.35001	-0.0736636	8.33863	0.00388108	0.0679816
HORVU6Hr1G016880	-2.31257	2.92689	8.33686	0.00388486	0.0679816
HORVU6Hr1G032720	-1.07882	1.19666	8.33591	0.00388689	0.0679816
HORVU6Hr1G083120	1.05178	5.99158	8.33292	0.00389331	0.0679816
HORVU3Hr1G014950	-0.620029	8.14776	8.33067	0.00389812	0.0679816
HORVU4Hr1G005900	0.546856	6.07252	8.33014	0.00389927	0.0679816
HORVU2Hr1G100970	0.836688	7.51375	8.32007	0.00392093	0.0682853
HORVU5Hr1G063430	1.43206	0.936253	8.31689	0.00392781	0.0683312
HORVU1Hr1G059140	-0.697984	4.76608	8.31191	0.00393859	0.0684447
HORVU4Hr1G070490	2.09994	-0.621844	8.30578	0.00395192	0.0684798
HORVU4Hr1G050160	0.58011	5.64811	8.30449	0.00395473	0.0684798
HORVU3Hr1G081270	-0.646165	4.40114	8.30432	0.00395509	0.0684798
HORVU2Hr1G034200	0.843419	3.30809	8.30072	0.00396294	0.0684798
HORVU3Hr1G052710	-1.7186	3.6521	8.29774	0.00396944	0.0684798
HORVU3Hr1G048950	-0.626547	8.82204	8.29759	0.00396978	0.0684798
HORVU7Hr1G100800	1.04431	2.65778	8.2973	0.0039704	0.0684798
HORVU2Hr1G101040	-0.632273	7.8895	8.29037	0.0039856	0.0686683
HORVU3Hr1G050820	-0.627898	5.34568	8.2859	0.00399542	0.0687639
HORVU7Hr1G067060	0.952949	6.66497	8.25767	0.00405803	0.0697668
HORVU6Hr1G000180	0.905843	5.34116	8.24892	0.00407762	0.0700007
HORVU1Hr1G083380	-0.548127	7.23612	8.24772	0.00408033	0.0700007
HORVU1Hr1G085240	2.57894	0.889275	8.23623	0.00410624	0.0703049
HORVU7Hr1G075170	-0.669874	8.27183	8.23598	0.0041068	0.0703049
HORVU2Hr1G120430	1.15622	1.24938	8.23305	0.00411342	0.0703182
HORVU2Hr1G125620	1.48553	-0.147769	8.23178	0.00411631	0.0703182
HORVU3Hr1G028540	-0.63536	8.13469	8.22578	0.00412995	0.0704763
HORVU3Hr1G068500	0.527705	6.06631	8.22376	0.00413455	0.0704801
HORVU6Hr1G091200	1.01849	1.96591	8.21897	0.00414548	0.0705916
HORVU1Hr1G062460	-0.603235	5.72828	8.21678	0.00415049	0.0706021
HORVU0Hr1G006680	1.12434	2.47877	8.21459	0.0041555	0.0706127
HORVU2Hr1G031390	1.27922	1.70026	8.20878	0.00416881	0.0707642
HORVU1Hr1G080520	-0.918153	4.76865	8.20458	0.00417847	0.0708535
HORVU3Hr1G015880	0.83042	3.61575	8.20181	0.00418486	0.0708871
HORVU3Hr1G071570	-0.566994	6.80614	8.19169	0.00420828	0.0712088
HORVU3Hr1G052880	2.27011	0.697528	8.18776	0.0042174	0.0712735
HORVU4Hr1G089910	0.900049	3.35438	8.18623	0.00422095	0.0712735
HORVU1Hr1G018350	1.66433	2.26327	8.17932	0.00423707	0.0714639
ENSRNA049460353	1.20856	0.332042	8.17631	0.0042441	0.0714639
HORVU5Hr1G061760	2.03984	0.080503	8.17569	0.00424556	0.0714639
HORVU6Hr1G058960	-0.891187	3.15311	8.17377	0.00425006	0.0714649
HORVU4Hr1G053150	2.81353	0.876436	8.17174	0.00425482	0.0714703
HORVU3Hr1G116480	-1.97963	0.673073	8.16885	0.0042616	0.0714872
HORVU6Hr1G049080	-0.607532	6.48457	8.16752	0.00426471	0.0714872
HORVU7Hr1G071600	-0.661427	4.66689	8.16009	0.00428223	0.0716534
HORVU6Hr1G041750	0.985169	5.97868	8.15954	0.00428353	0.0716534
HORVU3Hr1G028520	1.94307	0.217035	8.14115	0.00432718	0.0723085
HORVU6Hr1G068410	-0.586313	7.07814	8.13775	0.0043353	0.0723689
HORVU5Hr1G044640	-0.545616	5.67587	8.13367	0.00434508	0.072457
HORVU0Hr1G005160	-1.70322	5.38082	8.12638	0.00436257	0.0726288
HORVU3Hr1G110140	0.682141	4.06041	8.12562	0.00436441	0.0726288
HORVU5Hr1G106100	-0.64472	5.38612	8.12324	0.00437014	0.072649
HORVU2Hr1G053290	1.01793	5.81417	8.12094	0.00437568	0.0726661
HORVU7Hr1G114660	2.50443	4.75415	8.11266	0.00439573	0.0728654
HORVU7Hr1G029060	-1.16313	1.42377	8.11224	0.00439674	0.0728654
HORVU4Hr1G023570	1.14228	5.74862	8.09837	0.00443052	0.0733496
HORVU4Hr1G054240	-0.894673	2.41972	8.09556	0.00443738	0.0733504
HORVU7Hr1G091250	2.34259	4.06387	8.09462	0.00443968	0.0733504
HORVU2Hr1G040780	-1.56888	10.8802	8.08965	0.00445188	0.0734766
HORVU1Hr1G088040	0.850107	6.66681	8.07238	0.0044945	0.0741039
HORVU3Hr1G053500	1.09776	1.33647	8.05232	0.00454455	0.074842
HORVU2Hr1G113510	-1.04814	2.94225	8.04843	0.00455431	0.074842
HORVU5Hr1G116710	0.568823	5.04321	8.04667	0.00455875	0.074842
HORVU3Hr1G110580	2.56735	4.68193	8.04324	0.00456739	0.074842
HORVU5Hr1G093930	-0.81938	3.45219	8.04216	0.0045701	0.074842
HORVU4Hr1G069390	-0.548324	5.26489	8.04071	0.00457377	0.074842
HORVU4Hr1G016730	-1.2715	3.75595	8.04005	0.00457542	0.074842
HORVU5Hr1G095190	1.15762	0.601291	8.03964	0.00457647	0.074842
HORVU5Hr1G052280	0.934115	7.86488	8.0309	0.00459861	0.0750558
HORVU4Hr1G016260	-0.580882	7.19624	8.02973	0.00460156	0.0750558
HORVU7Hr1G112740	0.796054	7.06233	8.02774	0.00460664	0.0750558
HORVU3Hr1G055620	1.67794	0.34233	8.02712	0.0046082	0.0750558
HORVU0Hr1G017360	1.05845	5.54816	8.01435	0.00464082	0.0754173
HORVU6Hr1G070670	0.811854	7.43199	8.01288	0.00464459	0.0754173
HORVU3Hr1G002900	4.14179	1.31504	8.01061	0.00465041	0.0754173
HORVU0Hr1G030120	1.55967	2.1295	8.00958	0.00465306	0.0754173
HORVU1Hr1G087880	1.20499	0.80838	8.00928	0.00465383	0.0754173
HORVU4Hr1G043680	0.985534	4.55246	8.00273	0.00467069	0.0756144
HORVU3Hr1G084310	0.911843	6.59529	7.99891	0.00468055	0.0756979
HORVU4Hr1G089540	-1.70596	2.50834	7.9944	0.00469221	0.0758103
HORVU5Hr1G079490	-0.538547	7.34313	7.99226	0.00469778	0.0758241
HORVU7Hr1G113350	1.12649	3.60138	7.98447	0.00471803	0.0760609
HORVU1Hr1G080510	1.43276	0.0539706	7.98298	0.0047219	0.0760609
HORVU1Hr1G025870	1.61106	1.74734	7.97985	0.0047301	0.0761167
HORVU7Hr1G112710	1.67971	0.473301	7.97459	0.00474384	0.0762616
HORVU2Hr1G121440	0.969245	2.81048	7.9673	0.00476299	0.0764764
HORVU4Hr1G021010	-0.597472	4.66782	7.96589	0.00476671	0.0764764
HORVU6Hr1G058780	0.986633	4.3699	7.96205	0.00477684	0.0764946
HORVU5Hr1G092180	0.535136	5.74007	7.96185	0.00477735	0.0764946
HORVU3Hr1G092240	2.30511	0.185504	7.95888	0.00478519	0.0765441
HORVU2Hr1G080340	1.00894	5.79534	7.94914	0.00481101	0.0767093
HORVU1Hr1G069620	3.56894	-0.246084	7.94868	0.00481223	0.0767093
HORVU0Hr1G006640	0.681876	4.56289	7.94828	0.00481331	0.0767093
HORVU5Hr1G062680	1.00745	1.91371	7.9478	0.00481459	0.0767093
HORVU5Hr1G011720	0.776643	2.87602	7.93949	0.00483674	0.076986
HORVU2Hr1G122070	1.50595	-0.215998	7.92669	0.00487107	0.0774554
HORVU4Hr1G021390	-0.833078	3.00173	7.92492	0.00487586	0.0774554
HORVU5Hr1G053550	1.1441	1.94317	7.91942	0.00489069	0.0775783
HORVU4Hr1G088280	1.64117	0.178296	7.91848	0.00489324	0.0775783
HORVU7Hr1G101920	1.03132	2.3446	7.91053	0.00491479	0.0778434
HORVU2Hr1G001320	-1.33247	2.03659	7.90847	0.00492038	0.0778552
HORVU2Hr1G098110	-0.859149	3.67119	7.89121	0.00496755	0.0784936
HORVU5Hr1G009440	2.54362	-0.450665	7.8893	0.00497281	0.0784936
HORVU7Hr1G117120	1.24901	-0.269848	7.88805	0.00497626	0.0784936
HORVU4Hr1G090720	-1.22467	8.3774	7.8866	0.00498023	0.0784936
HORVU1Hr1G027840	-0.704279	9.81023	7.88226	0.0049922	0.0786052
HORVU3Hr1G100190	2.87587	3.46377	7.87555	0.00501075	0.0786323
HORVU2Hr1G024840	0.731415	3.60864	7.87376	0.00501573	0.0786323
HORVU4Hr1G009230	2.30856	-0.499278	7.87268	0.00501872	0.0786323
HORVU1Hr1G003590	0.825088	5.16356	7.87261	0.0050189	0.0786323
HORVU2Hr1G050260	1.70566	1.47224	7.87112	0.00502306	0.0786323
HORVU3Hr1G030540	-0.598763	5.64831	7.86744	0.0050333	0.0786323
HORVU2Hr1G103520	0.539883	7.528	7.86664	0.00503551	0.0786323
HORVU4Hr1G075390	0.570301	4.98079	7.86646	0.00503601	0.0786323
HORVU5Hr1G009610	0.882453	3.90897	7.86578	0.0050379	0.0786323
HORVU5Hr1G111810	1.2328	2.37443	7.86168	0.00504934	0.0787345
HORVU5Hr1G093660	-1.34566	4.01481	7.85945	0.00505558	0.0787555
HORVU4Hr1G074450	0.764202	3.87272	7.85505	0.00506789	0.0788709
HORVU5Hr1G049180	1.25384	1.59547	7.85248	0.00507511	0.0789069
HORVU5Hr1G114500	0.630098	4.6094	7.84868	0.00508577	0.0789435
HORVU6Hr1G076780	0.873848	2.49964	7.84788	0.00508804	0.0789435
HORVU6Hr1G015690	-0.645971	8.14321	7.84318	0.00510129	0.0789435
HORVU2Hr1G003460	-0.560631	8.07135	7.843	0.00510179	0.0789435
HORVU4Hr1G067020	-1.77565	2.89376	7.84293	0.00510199	0.0789435
HORVU7Hr1G114650	-0.724526	6.69119	7.83891	0.00511334	0.0790431
HORVU5Hr1G111820	0.97785	6.93146	7.82421	0.0051551	0.0796122
HORVU6Hr1G000070	2.64533	0.859811	7.81245	0.00518875	0.0800551
HORVU6Hr1G083170	0.908934	2.1246	7.80601	0.00520727	0.0802638
HORVU7Hr1G087050	0.630142	9.23656	7.80203	0.00521876	0.0803639
HORVU6Hr1G079830	1.04615	2.4237	7.79597	0.0052363	0.080557
HORVU5Hr1G000980	1.57532	3.04365	7.79148	0.00524932	0.0806801
HORVU3Hr1G112100	0.884218	6.05837	7.7713	0.00530827	0.0813842
HORVU4Hr1G007620	-1.70648	0.43646	7.76985	0.00531255	0.0813842
HORVU7Hr1G119900	1.84409	0.422637	7.76895	0.0053152	0.0813842
HORVU2Hr1G109590	4.3399	0.582248	7.76889	0.00531536	0.0813842
HORVU2Hr1G120490	-1.07803	5.13417	7.76494	0.00532701	0.0814851
HORVU7Hr1G075250	0.760615	6.6522	7.76256	0.00533402	0.0815067
HORVU5Hr1G023480	-1.14306	2.08331	7.76103	0.00533856	0.0815067
HORVU1Hr1G062240	1.13237	1.15983	7.75129	0.00536742	0.0818697
HORVU1Hr1G022550	-0.57342	5.75076	7.7478	0.00537779	0.0819502
HORVU1Hr1G093400	0.584474	4.22601	7.7435	0.00539063	0.0820054
HORVU5Hr1G073760	1.10395	0.785331	7.74317	0.0053916	0.0820054
HORVU5Hr1G109250	-2.20692	6.48882	7.73996	0.00540119	0.0820736
HORVU1Hr1G088760	0.742612	5.62198	7.736	0.00541305	0.0820795
HORVU2Hr1G018340	0.906173	1.80428	7.73456	0.00541736	0.0820795
HORVU6Hr1G032960	-0.788593	3.57044	7.73356	0.00542038	0.0820795
HORVU7Hr1G012570	0.868486	2.26634	7.73303	0.00542198	0.0820795
HORVU7Hr1G107310	0.978202	2.3085	7.72932	0.00543311	0.0821707
HORVU5Hr1G001920	1.63404	4.28915	7.72581	0.00544368	0.0822533
HORVU3Hr1G026880	1.15859	5.64786	7.71935	0.00546321	0.0823664
HORVU2Hr1G018700	0.743646	7.95698	7.71791	0.00546758	0.0823664
HORVU7Hr1G092370	-0.567879	6.49801	7.71697	0.00547043	0.0823664
HORVU6Hr1G067870	1.0108	6.62623	7.71656	0.00547164	0.0823664
HORVU2Hr1G008250	1.45828	1.27071	7.7148	0.005477	0.0823699
HORVU4Hr1G089690	-3.65249	2.85853	7.70747	0.00549929	0.0825854
HORVU6Hr1G059370	0.584275	4.41396	7.70618	0.0055032	0.0825854
HORVU7Hr1G049860	1.65968	0.931508	7.70437	0.00550874	0.0825854
HORVU3Hr1G072540	-0.681986	6.06471	7.70335	0.00551185	0.0825854
HORVU0Hr1G018270	-1.7102	0.730568	7.66902	0.00561771	0.0840765
HORVU6Hr1G087960	0.721172	3.8452	7.6677	0.00562182	0.0840765
HORVU5Hr1G105870	0.852151	5.69416	7.66114	0.0056423	0.0843044
HORVU2Hr1G070440	0.841215	5.64667	7.65341	0.00566652	0.0845097
HORVU1Hr1G057460	0.925022	5.65753	7.65181	0.00567153	0.0845097
HORVU4Hr1G057140	-0.58134	4.91687	7.65006	0.00567706	0.0845097
HORVU2Hr1G052650	0.883225	6.44233	7.64982	0.0056778	0.0845097
HORVU6Hr1G053490	0.773825	4.3146	7.64818	0.00568296	0.0845097
HORVU4Hr1G057550	-1.20559	6.33133	7.64509	0.0056927	0.0845097
HORVU1Hr1G059780	0.928838	2.45219	7.64506	0.0056928	0.0845097
HORVU4Hr1G076640	1.06107	0.944543	7.63761	0.00571636	0.0847813
HORVU6Hr1G053890	0.566837	5.16682	7.63269	0.00573198	0.0849346
HORVU5Hr1G018660	0.57534	5.47837	7.62247	0.00576454	0.0852249
HORVU2Hr1G038120	2.40645	0.618638	7.61732	0.00578102	0.0852249
HORVU4Hr1G070320	0.780351	3.07895	7.61716	0.00578155	0.0852249
HORVU7Hr1G095840	1.13972	1.12379	7.61606	0.00578509	0.0852249
HORVU2Hr1G102190	1.0865	2.46842	7.61584	0.00578579	0.0852249
HORVU7Hr1G118990	-1.97651	0.0929385	7.61496	0.00578862	0.0852249
HORVU7Hr1G028050	0.705219	5.27127	7.61401	0.00579166	0.0852249
HORVU1Hr1G072060	0.95003	6.25705	7.6133	0.00579394	0.0852249
HORVU6Hr1G088400	2.05678	2.49504	7.6112	0.00580068	0.0852379
HORVU6Hr1G086600	0.849876	2.55452	7.60909	0.00580749	0.0852379
HORVU1Hr1G028820	0.87086	6.48284	7.60809	0.00581071	0.0852379
HORVU4Hr1G016470	-0.575366	9.06741	7.60492	0.00582093	0.08531
HORVU2Hr1G065750	1.28169	2.08882	7.59632	0.00584874	0.0855
HORVU2Hr1G020900	1.36022	1.54906	7.59629	0.00584886	0.0855
HORVU2Hr1G122020	0.971301	3.21055	7.59599	0.00584983	0.0855
HORVU7Hr1G095010	-0.500292	5.75492	7.58253	0.00589368	0.0860627
HORVU1Hr1G043920	2.24602	3.4644	7.58073	0.00589954	0.0860702
HORVU7Hr1G073720	0.757553	8.03736	7.5771	0.00591145	0.0861239
HORVU5Hr1G074200	-0.576216	6.94341	7.57481	0.00591897	0.0861239
HORVU4Hr1G084420	0.938552	6.64602	7.57323	0.00592416	0.0861239
HORVU3Hr1G018130	0.63213	3.67068	7.57227	0.00592731	0.0861239
HORVU7Hr1G040900	1.12704	0.279365	7.57146	0.00592998	0.0861239
HORVU4Hr1G020060	1.01228	0.720735	7.55817	0.00597387	0.0866246
HORVU6Hr1G079600	2.23923	1.89327	7.55753	0.00597597	0.0866246
HORVU2Hr1G113940	0.912444	3.08317	7.55614	0.00598061	0.0866246
HORVU3Hr1G085460	1.09973	3.50992	7.55137	0.00599645	0.086776
HORVU5Hr1G017230	-0.617019	4.51322	7.5444	0.00601969	0.087034
HORVU2Hr1G000580	0.748074	3.82289	7.53893	0.00603798	0.0871532
HORVU1Hr1G021340	1.15805	0.426468	7.5387	0.00603877	0.0871532
HORVU5Hr1G099460	3.67329	1.05267	7.5356	0.00604915	0.0871867
HORVU1Hr1G079370	0.807459	6.99776	7.53404	0.00605441	0.0871867
HORVU7Hr1G025620	-0.559722	7.02535	7.53202	0.0060612	0.0871867
HORVU6Hr1G072030	0.561243	6.50251	7.53155	0.00606276	0.0871867
HORVU2Hr1G090490	1.27049	-0.122802	7.52982	0.00606859	0.0871927
HORVU1Hr1G078910	-0.563988	6.28848	7.52816	0.00607418	0.0871952
HORVU7Hr1G028910	0.739463	8.73357	7.52604	0.00608134	0.0872199
HORVU5Hr1G082310	1.72423	4.2334	7.52307	0.00609136	0.0872199
HORVU7Hr1G001800	1.19581	2.54601	7.52284	0.00609217	0.0872199
HORVU7Hr1G047200	1.11522	1.40168	7.50897	0.00613923	0.0878155
HORVU1Hr1G004510	0.647959	4.19765	7.50046	0.00616832	0.0881533
HORVU7Hr1G088580	0.86333	7.37142	7.49574	0.00618449	0.088306
HORVU2Hr1G043220	0.979503	6.95037	7.49036	0.00620302	0.0883968
HORVU2Hr1G063840	0.538954	5.49196	7.4893	0.00620667	0.0883968
HORVU1Hr1G021720	0.792675	8.71599	7.48911	0.00620733	0.0883968
HORVU6Hr1G085980	1.39565	0.188971	7.48444	0.00622345	0.0884125
HORVU5Hr1G112210	1.36692	2.46596	7.48267	0.00622958	0.0884125
HORVU3Hr1G066810	0.61898	4.13724	7.48264	0.00622965	0.0884125
HORVU6Hr1G056610	1.28148	2.39691	7.48242	0.00623041	0.0884125
HORVU3Hr1G026060	0.908907	7.29897	7.47578	0.00625345	0.0886612
HORVU7Hr1G021120	1.22265	0.453811	7.47372	0.0062606	0.0886845
HORVU3Hr1G054360	-0.689375	7.05868	7.458	0.0063155	0.0893835
HORVU6Hr1G087780	0.69519	5.17439	7.45339	0.00633171	0.0895342
HORVU4Hr1G070630	0.560135	6.22585	7.44922	0.00634641	0.0896632
HORVU7Hr1G107360	3.9999	0.970591	7.44503	0.00636118	0.089741
HORVU1Hr1G059510	-0.559028	6.5295	7.44316	0.00636781	0.089741
HORVU5Hr1G120420	-1.00752	3.40015	7.44223	0.0063711	0.089741
HORVU5Hr1G109910	0.905834	6.40671	7.44135	0.00637422	0.089741
HORVU6Hr1G091660	-1.71612	1.96867	7.43773	0.00638703	0.0897943
HORVU0Hr1G008640	-0.762324	7.51547	7.43713	0.00638917	0.0897943
HORVU5Hr1G069380	-0.572522	6.16689	7.42584	0.00642939	0.0902808
HORVU4Hr1G001220	0.943557	7.63256	7.42285	0.00644007	0.0903519
HORVU3Hr1G009490	1.50239	1.40909	7.41305	0.00647525	0.0907663
HORVU5Hr1G009830	0.557116	5.59033	7.40652	0.00649878	0.0909812
HORVU6Hr1G061390	1.76363	3.06639	7.40472	0.00650531	0.0909812
HORVU7Hr1G075360	0.788123	7.56477	7.4041	0.00650754	0.0909812
HORVU6Hr1G071950	0.78655	5.04894	7.40219	0.00651446	0.0909989
HORVU3Hr1G094330	1.12727	1.84367	7.3983	0.00652857	0.0910613
HORVU5Hr1G076700	0.810732	7.37696	7.39732	0.00653213	0.0910613
HORVU7Hr1G096990	0.85766	6.18305	7.39627	0.00653591	0.0910613
HORVU6Hr1G005240	0.796943	3.61356	7.39329	0.00654676	0.0910814
HORVU7Hr1G025900	1.57168	-0.248386	7.39277	0.00654867	0.0910814
HORVU1Hr1G050640	-0.683175	8.76721	7.38654	0.00657136	0.0913181
HORVU2Hr1G058790	2.12445	2.4805	7.37885	0.00659953	0.0916304
HORVU7Hr1G089450	-1.15762	5.08388	7.3749	0.00661404	0.091733
HORVU3Hr1G088700	0.713104	3.21268	7.37374	0.00661832	0.091733
HORVU3Hr1G030640	0.664386	3.84754	7.37064	0.00662974	0.0918123
HORVU6Hr1G004120	1.109	2.70305	7.36458	0.00665213	0.092043
HORVU7Hr1G111360	1.26398	0.135554	7.35636	0.00668261	0.0923853
HORVU1Hr1G060180	0.494446	6.26593	7.35423	0.0066905	0.092415
HORVU4Hr1G051360	0.927625	3.74462	7.3471	0.00671711	0.0926578
HORVU4Hr1G016330	1.5031	-0.552498	7.34643	0.00671959	0.0926578
HORVU5Hr1G001750	-1.13146	4.07764	7.33757	0.00675281	0.0930361
HORVU7Hr1G013710	0.752408	6.7562	7.33451	0.00676433	0.0931151
HORVU6Hr1G091430	-0.945639	2.85633	7.32933	0.00678382	0.0933037
HORVU5Hr1G067230	-1.10923	4.44354	7.32132	0.00681415	0.093617
HORVU4Hr1G010430	-0.569402	6.73304	7.32024	0.00681824	0.093617
HORVU2Hr1G017120	0.901453	2.90868	7.31487	0.00683864	0.0938171
HORVU3Hr1G077440	0.914014	1.82741	7.3118	0.00685033	0.0938809
HORVU4Hr1G076820	2.56587	3.03828	7.31058	0.00685496	0.0938809
HORVU3Hr1G093830	1.63188	2.976	7.29185	0.0069268	0.0947139
HORVU6Hr1G087420	0.974738	5.30956	7.29166	0.00692756	0.0947139
HORVU4Hr1G061650	0.534241	5.8575	7.28999	0.00693401	0.0947216
HORVU5Hr1G088210	0.845863	3.20838	7.28713	0.00694504	0.0947918
HORVU7Hr1G041080	-0.813608	5.65153	7.27885	0.00697711	0.0951488
HORVU6Hr1G071810	-0.843265	1.92221	7.27674	0.00698534	0.0951804
HORVU4Hr1G009960	0.593329	4.92572	7.2718	0.00700454	0.0953613
HORVU4Hr1G016050	1.6261	-0.225977	7.26405	0.00703485	0.0956929
HORVU4Hr1G009950	0.879672	2.06434	7.26057	0.00704849	0.0957805
HORVU1Hr1G025910	1.08835	1.38108	7.25937	0.00705319	0.0957805
HORVU3Hr1G055450	1.37326	1.74673	7.25572	0.00706756	0.0958266
HORVU5Hr1G045620	1.06241	5.56942	7.25548	0.00706849	0.0958266
HORVU2Hr1G023560	-1.10103	9.98731	7.24676	0.0071029	0.096212
HORVU6Hr1G091320	0.900381	2.63548	7.23908	0.00713334	0.0964782
HORVU5Hr1G053270	-0.671297	7.81693	7.23878	0.00713455	0.0964782
HORVU4Hr1G024950	-0.795468	6.83573	7.23558	0.00714727	0.0965691
HORVU6Hr1G037960	0.658907	5.78994	7.23168	0.0071628	0.0966314
HORVU2Hr1G121290	1.83467	0.918946	7.23141	0.00716389	0.0966314
HORVU7Hr1G115280	0.645724	6.653	7.22751	0.00717946	0.0967603
HORVU7Hr1G021280	-0.578512	8.46729	7.22246	0.00719968	0.0968823
HORVU1Hr1G049100	2.05204	0.372083	7.22225	0.00720055	0.0968823
HORVU6Hr1G052600	0.837166	7.38595	7.2194	0.00721196	0.0969486
HORVU3Hr1G069290	-0.858139	2.98753	7.21802	0.00721753	0.0969486
HORVU1Hr1G020240	-0.631146	7.62721	7.2136	0.00723533	0.0971066
HORVU7Hr1G089910	-0.536117	5.53227	7.21008	0.00724955	0.0972164
HORVU5Hr1G068060	1.43923	4.87404	7.20543	0.00726833	0.0973513
HORVU5Hr1G066000	0.729906	6.79465	7.2046	0.00727171	0.0973513
HORVU2Hr1G096640	0.551791	4.81253	7.2013	0.0072851	0.0974495
HORVU3Hr1G024660	1.63073	0.230138	7.19844	0.00729671	0.0975096
HORVU1Hr1G043480	1.17396	1.07698	7.19721	0.00730171	0.0975096
HORVU6Hr1G069210	1.13305	1.12391	7.19326	0.0073178	0.0976435
HORVU7Hr1G029860	0.838332	5.89459	7.18865	0.00733664	0.097753
HORVU4Hr1G078590	-0.544239	7.21786	7.18827	0.00733816	0.097753
HORVU3Hr1G001140	0.820094	5.4334	7.18268	0.00736107	0.0979771
HORVU7Hr1G101240	1.58576	1.80169	7.17874	0.00737723	0.0981111
HORVU3Hr1G028710	1.43638	0.472947	7.16896	0.0074176	0.0985037
HORVU7Hr1G048470	0.821951	3.1466	7.16862	0.007419	0.0985037
HORVU5Hr1G097900	-1.01786	1.87343	7.16467	0.00743535	0.0986395
HORVU3Hr1G035680	1.58272	-0.0303971	7.1574	0.00746552	0.0989439
HORVU5Hr1G044830	-0.575821	6.46917	7.15618	0.0074706	0.0989439
HORVU4Hr1G006100	-1.33257	3.33911	7.15048	0.00749441	0.0990444
HORVU6Hr1G075590	0.62605	5.20348	7.15046	0.00749447	0.0990444
HORVU2Hr1G080720	1.48875	0.0770574	7.14994	0.00749665	0.0990444
HORVU5Hr1G066490	-0.5865	8.16425	7.14738	0.00750737	0.0991047
HORVU4Hr1G009360	0.680814	3.51941	7.14355	0.00752342	0.099109
HORVU6Hr1G051450	0.755402	5.06813	7.14252	0.00752771	0.099109
HORVU0Hr1G038420	-1.07605	2.62025	7.14182	0.00753068	0.099109
HORVU7Hr1G100230	-0.786708	6.45915	7.14142	0.00753233	0.099109
HORVU6Hr1G061420	1.94733	0.600394	7.13867	0.0075439	0.0991801
HORVU2Hr1G073320	0.770746	6.34774	7.13044	0.00757859	0.099384
HORVU4Hr1G027260	-0.769587	14.0798	7.12953	0.00758247	0.099384
HORVU3Hr1G111760	0.81045	7.02602	7.12903	0.00758457	0.099384
HORVU5Hr1G018830	-0.889286	3.43342	7.12859	0.00758645	0.099384
HORVU2Hr1G111780	1.81464	1.5064	7.12657	0.00759501	0.099384
HORVU7Hr1G092230	1.0634	3.50023	7.12622	0.00759647	0.099384
HORVU5Hr1G107410	1.17259	0.819265	7.12278	0.00761104	0.0994938
HORVU3Hr1G063670	0.875202	7.20307	7.11966	0.0076243	0.0995863
HORVU5Hr1G098740	0.769438	5.98681	7.11151	0.00765904	0.0999589
HORVU7Hr1G045330	-1.04603	0.867072	7.10937	0.00766822	0.0999976
HORVU3Hr1G050340	0.788551	7.19083	7.10616	0.00768194	0.100095
HORVU2Hr1G120150	0.731933	4.07933	7.09359	0.007736	0.100718
HORVU5Hr1G106350	1.29567	0.683983	7.06625	0.00785496	0.102184
HORVU2Hr1G085880	0.527283	5.71628	7.06359	0.0078666	0.102253
HORVU0Hr1G038330	0.709368	4.09713	7.05835	0.00788966	0.102442
HORVU7Hr1G003170	5.65706	0.28272	7.0574	0.00789384	0.102442
HORVU5Hr1G112340	-1.02734	5.40238	7.05374	0.00790999	0.102569
HORVU3Hr1G081760	0.816206	3.20476	7.05068	0.00792353	0.102661
HORVU6Hr1G062320	-0.948486	1.81817	7.03845	0.00797779	0.103281
HORVU5Hr1G123490	0.659688	3.76542	7.03697	0.00798439	0.103284
HORVU5Hr1G081160	1.27401	0.120231	7.03236	0.00800498	0.10346
HORVU4Hr1G025320	0.737635	3.70463	7.03098	0.00801113	0.10346
HORVU1Hr1G053000	-0.554068	5.37782	7.02788	0.00802502	0.10346
HORVU2Hr1G038770	-0.85013	3.80993	7.02761	0.00802625	0.10346
HORVU2Hr1G080430	2.0895	0.419191	7.02472	0.0080392	0.10346
HORVU2Hr1G094630	2.68699	0.243191	7.02446	0.00804037	0.10346
HORVU1Hr1G041710	-0.603979	5.38756	7.02253	0.00804904	0.10346
HORVU2Hr1G036240	-0.647534	4.13619	7.02243	0.00804948	0.10346
HORVU2Hr1G086170	0.788397	2.82328	7.01562	0.00808017	0.103772
HORVU0Hr1G005420	2.34115	-0.107496	7.01163	0.00809818	0.103886
HORVU7Hr1G080630	0.778134	5.40651	7.01079	0.008102	0.103886
HORVU5Hr1G075420	0.7818	6.78543	7.00586	0.00812433	0.10409
HORVU1Hr1G086380	0.673546	4.4901	6.99939	0.00815373	0.104383
HORVU5Hr1G000010	-0.525827	7.40549	6.98974	0.00819781	0.104782
HORVU4Hr1G070680	-0.496655	5.13052	6.98972	0.0081979	0.104782
HORVU6Hr1G008730	3.13109	1.29931	6.98353	0.00822631	0.104992
HORVU1Hr1G021160	1.30352	1.51853	6.9833	0.00822738	0.104992
HORVU6Hr1G093060	-0.477989	7.23334	6.97907	0.00824683	0.105157
HORVU4Hr1G006080	1.11234	0.917365	6.97453	0.00826779	0.105341
HORVU2Hr1G038140	2.31051	1.28222	6.97116	0.00828338	0.105456
HORVU5Hr1G037760	-0.518006	5.67588	6.96772	0.00829934	0.105575
HORVU2Hr1G019160	1.48465	2.57303	6.96294	0.00832153	0.105774
HORVU2Hr1G078510	1.00462	4.29845	6.96029	0.00833385	0.105847
HORVU5Hr1G103770	2.21514	-0.1882	6.95831	0.0083431	0.105881
HORVU4Hr1G026390	-0.613269	6.00894	6.93401	0.00845718	0.107244
HORVU2Hr1G125580	1.47806	0.235015	6.92915	0.00848018	0.10737
HORVU1Hr1G006860	-0.554136	7.61421	6.92882	0.00848177	0.10737
HORVU1Hr1G013810	1.21417	1.17893	6.9277	0.0084871	0.10737
HORVU1Hr1G086480	-1.84377	0.675706	6.92414	0.008504	0.107499
HORVU1Hr1G038620	1.00991	6.55824	6.91949	0.00852612	0.107624
HORVU5Hr1G054080	-0.501353	7.48408	6.91926	0.00852723	0.107624
HORVU7Hr1G040690	1.28741	-0.13422	6.91747	0.00853575	0.107647
HORVU1Hr1G021120	0.751071	5.1719	6.91134	0.00856509	0.107932
HORVU5Hr1G006330	2.18291	0.262511	6.9068	0.00858683	0.108122
HORVU6Hr1G044840	0.852224	5.45888	6.90468	0.00859703	0.108165
HORVU5Hr1G080340	-0.746046	3.55538	6.90243	0.00860789	0.108217
HORVU5Hr1G001670	-1.39645	0.60225	6.89024	0.00866678	0.108873
HORVU1Hr1G042220	1.19825	5.42331	6.88714	0.00868179	0.108976
HORVU1Hr1G075920	-0.614228	5.26855	6.88353	0.00869935	0.109111
HORVU4Hr1G074270	0.884396	6.10752	6.87987	0.0087172	0.109245
HORVU7Hr1G031100	0.492658	5.16437	6.87732	0.00872962	0.109245
HORVU0Hr1G012260	-0.630658	5.18523	6.87717	0.00873035	0.109245
HORVU3Hr1G019820	-0.623673	7.01707	6.87412	0.00874526	0.109257
HORVU4Hr1G077350	2.92553	2.23401	6.87396	0.00874606	0.109257
HORVU5Hr1G074660	0.694126	3.09863	6.8728	0.00875172	0.109257
HORVU1Hr1G077100	-1.76789	0.164522	6.87016	0.00876468	0.109334
HORVU6Hr1G001480	-1.25261	2.7083	6.86857	0.0087725	0.109347
HORVU2Hr1G056750	1.31951	3.10914	6.86217	0.00880395	0.109628
HORVU3Hr1G059060	0.592583	9.58761	6.86122	0.00880864	0.109628
HORVU5Hr1G035800	-1.07078	3.43216	6.85519	0.00883839	0.109895
HORVU1Hr1G090990	-0.5825	9.99299	6.8541	0.0088438	0.109895
HORVU1Hr1G050110	-0.793645	2.44175	6.85052	0.00886156	0.109929
HORVU7Hr1G076250	-0.661326	4.06899	6.85009	0.0088637	0.109929
HORVU2Hr1G020240	0.72812	5.95194	6.84932	0.00886751	0.109929
HORVU4Hr1G015070	0.868895	2.09336	6.84805	0.00887381	0.109929
HORVU1Hr1G083420	-0.51906	5.67842	6.84448	0.00889153	0.110063
HORVU4Hr1G072360	2.00788	0.81159	6.84313	0.0088983	0.110063
HORVU6Hr1G016200	-0.574505	6.04841	6.84049	0.00891143	0.11014
HORVU1Hr1G055440	1.0301	7.52363	6.83687	0.0089295	0.110279
HORVU2Hr1G081560	-1.35415	0.807495	6.83372	0.00894527	0.110389
HORVU2Hr1G081670	1.06297	1.03232	6.82885	0.00896968	0.110523
HORVU4Hr1G056640	0.80214	2.84533	6.82834	0.00897226	0.110523
HORVU3Hr1G009560	0.896355	9.20861	6.82744	0.00897677	0.110523
HORVU6Hr1G008870	0.58012	5.92614	6.81867	0.00902099	0.110983
HORVU4Hr1G000510	-0.64068	4.06446	6.80928	0.00906853	0.111483
HORVU1Hr1G059570	0.888035	7.04817	6.8038	0.00909642	0.11174
HORVU6Hr1G058290	0.895096	2.91245	6.79029	0.00916552	0.112432
HORVU2Hr1G083700	1.40059	0.260243	6.79005	0.00916675	0.112432
HORVU1Hr1G093760	1.90555	1.0716	6.78684	0.00918321	0.112549
HORVU7Hr1G113230	-0.54557	5.62062	6.78237	0.00920624	0.112723
HORVU2Hr1G067370	0.763282	8.59809	6.78136	0.00921147	0.112723
HORVU5Hr1G104720	0.781891	7.66044	6.77902	0.00922355	0.112785
HORVU5Hr1G081860	1.31226	8.46363	6.77557	0.00924138	0.112824
HORVU5Hr1G054180	0.91283	6.04539	6.77545	0.009242	0.112824
HORVU6Hr1G095250	0.568567	5.76165	6.77355	0.00925184	0.112824
HORVU7Hr1G046350	0.930615	1.1292	6.77299	0.00925478	0.112824
HORVU1Hr1G086110	-0.54614	7.25358	6.77073	0.00926651	0.112882
HORVU4Hr1G053460	0.804791	3.1511	6.76674	0.00928721	0.113032
HORVU5Hr1G106380	0.559027	7.24771	6.76415	0.00930073	0.113032
HORVU1Hr1G082120	0.969884	1.88694	6.76183	0.00931282	0.113032
HORVU0Hr1G012710	-0.848137	2.07372	6.76178	0.00931307	0.113032
HORVU3Hr1G067180	0.829527	3.13909	6.76162	0.00931393	0.113032
HORVU5Hr1G096060	0.861776	6.81627	6.75067	0.00937123	0.113613
HORVU5Hr1G035440	-0.529894	4.68834	6.74977	0.00937599	0.113613
HORVU2Hr1G019660	0.533801	6.58992	6.7484	0.0093832	0.113615
HORVU6Hr1G061800	-0.553098	8.76704	6.74285	0.00941242	0.113793
HORVU4Hr1G057730	1.01624	0.858948	6.74233	0.00941515	0.113793
HORVU1Hr1G062950	0.988158	1.44514	6.74158	0.00941911	0.113793
HORVU3Hr1G096850	0.727224	5.58835	6.73762	0.00944005	0.113904
HORVU7Hr1G118770	2.02136	-0.279303	6.73716	0.00944249	0.113904
HORVU2Hr1G020920	1.44503	1.60027	6.73478	0.00945508	0.113971
HORVU1Hr1G009900	0.496159	5.23983	6.72952	0.00948299	0.114148
HORVU3Hr1G046570	-0.521308	5.05459	6.72723	0.00949518	0.114148
HORVU4Hr1G043660	0.605726	4.04499	6.72542	0.00950485	0.114148
HORVU2Hr1G078570	0.611417	4.84287	6.72519	0.00950605	0.114148
HORVU5Hr1G112850	0.5121	4.96789	6.72477	0.00950829	0.114148
HORVU7Hr1G082510	-0.65516	7.22705	6.72334	0.00951591	0.114148
HORVU7Hr1G107140	0.840487	2.13116	6.72135	0.00952656	0.114148
HORVU2Hr1G088180	-0.53728	6.63701	6.72078	0.0095296	0.114148
HORVU1Hr1G085170	0.700029	5.55514	6.72002	0.00953365	0.114148
HORVU4Hr1G044460	-0.597833	7.06212	6.71753	0.00954697	0.114223
HORVU0Hr1G004150	0.881559	6.27391	6.71172	0.00957814	0.114511
HORVU1Hr1G066190	0.871509	2.03881	6.69708	0.00965709	0.115369
HORVU4Hr1G052090	0.928328	3.48713	6.69366	0.00967562	0.115504
HORVU4Hr1G009140	-0.492533	6.66014	6.68469	0.00972443	0.116001
HORVU4Hr1G078820	0.632482	5.02277	6.68184	0.00974	0.116059
HORVU7Hr1G008800	-0.559076	5.21066	6.68107	0.00974423	0.116059
HORVU6Hr1G078500	-0.74923	7.58483	6.67904	0.00975529	0.116059
HORVU3Hr1G097770	1.14134	5.07897	6.67853	0.00975812	0.116059
HORVU7Hr1G040870	1.11225	0.847606	6.67506	0.00977714	0.116199
HORVU5Hr1G061150	1.08278	1.29089	6.67321	0.0097873	0.116223
HORVU7Hr1G013170	1.98993	4.59693	6.67206	0.00979362	0.116223
HORVU4Hr1G029060	0.970292	1.95888	6.66744	0.00981904	0.116439
HORVU1Hr1G082150	1.60532	0.562873	6.66333	0.00984167	0.1165
HORVU6Hr1G056230	1.0645	3.13439	6.6608	0.00985567	0.1165
HORVU2Hr1G085360	0.594509	5.01003	6.65947	0.00986304	0.1165
HORVU7Hr1G063280	1.02944	6.89064	6.65888	0.00986631	0.1165
HORVU3Hr1G002530	-0.829515	8.32448	6.65839	0.00986901	0.1165
HORVU5Hr1G041530	-1.02113	4.40491	6.65636	0.00988027	0.1165
HORVU7Hr1G108460	1.43108	0.422016	6.65514	0.00988701	0.1165
HORVU2Hr1G118790	1.14302	3.06239	6.65369	0.00989505	0.1165
HORVU7Hr1G121320	-2.24219	0.471489	6.65347	0.00989629	0.1165
HORVU7Hr1G030840	1.42604	0.0566305	6.65342	0.00989658	0.1165
HORVU3Hr1G003020	1.01008	1.56155	6.6521	0.0099039	0.116501
HORVU6Hr1G030880	0.638667	5.19089	6.64929	0.00991952	0.116566
HORVU3Hr1G084450	1.26104	0.0553087	6.6482	0.0099256	0.116566
HORVU7Hr1G028260	1.17575	-0.268657	6.64651	0.00993501	0.116566
HORVU6Hr1G093850	-0.721411	3.77812	6.64591	0.00993839	0.116566
HORVU3Hr1G086410	0.688524	5.40146	6.64073	0.00996732	0.116691
HORVU2Hr1G098860	-0.672659	8.28564	6.63625	0.00999241	0.116691
HORVU5Hr1G049690	0.719961	3.03003	6.63565	0.00999579	0.116691
HORVU4Hr1G086790	0.69778	5.02277	6.63563	0.0099959	0.116691
HORVU7Hr1G051280	-0.651456	4.69632	6.63534	0.00999753	0.116691
HORVU5Hr1G123240	-0.464166	5.97809	6.63515	0.0099986	0.116691
HORVU6Hr1G015450	-0.850602	7.67652	6.63494	0.00999977	0.116691
HORVU5Hr1G081720	-0.933009	1.89192	6.62759	0.0100411	0.117088
HORVU7Hr1G040550	0.510025	6.0893	6.62218	0.0100716	0.117311
HORVU4Hr1G083210	1.01048	6.75609	6.62041	0.0100817	0.117311
HORVU0Hr1G003900	2.04134	0.899612	6.62034	0.0100821	0.117311
HORVU5Hr1G027150	1.24839	3.33703	6.61807	0.0100949	0.117375
HORVU0Hr1G017570	-0.514423	4.82678	6.6148	0.0101135	0.117506
HORVU7Hr1G062770	1.13766	2.18806	6.60595	0.0101639	0.117974
HORVU4Hr1G016720	0.960364	1.39319	6.60429	0.0101733	0.117974
HORVU1Hr1G059300	1.31429	2.62504	6.60387	0.0101757	0.117974
HORVU7Hr1G025230	-1.12605	3.51574	6.59667	0.010217	0.118367
HORVU3Hr1G010980	-0.677182	7.25703	6.58567	0.0102803	0.118966
HORVU7Hr1G109950	0.754888	3.591	6.58393	0.0102903	0.118966
HORVU7Hr1G051030	0.951381	1.24487	6.58383	0.0102909	0.118966
HORVU3Hr1G014270	1.71252	2.59779	6.5796	0.0103154	0.119164
HORVU7Hr1G052960	0.811811	6.61043	6.57831	0.0103229	0.119165
HORVU7Hr1G038290	0.933292	3.04973	6.57573	0.0103378	0.119252
HORVU2Hr1G029890	0.695945	6.19636	6.57428	0.0103463	0.119257
HORVU7Hr1G046980	0.918587	4.8157	6.57311	0.0103531	0.119257
HORVU5Hr1G066080	0.776055	3.465	6.56	0.0104296	0.120053
HORVU1Hr1G042920	-0.479896	6.5547	6.55348	0.0104679	0.120408
HORVU6Hr1G061440	-0.520742	7.82742	6.55147	0.0104798	0.120457
HORVU5Hr1G094210	-1.00294	4.44994	6.54888	0.010495	0.120547
HORVU7Hr1G009890	0.778536	4.1276	6.54737	0.0105039	0.120563
HORVU1Hr1G057510	1.13859	3.24293	6.54523	0.0105166	0.120622
HORVU5Hr1G106580	0.767841	6.36075	6.53931	0.0105516	0.120938
HORVU6Hr1G036840	-1.05642	0.932677	6.53545	0.0105745	0.12098
HORVU7Hr1G098170	1.22659	1.31252	6.53424	0.0105817	0.12098
HORVU2Hr1G022900	0.703569	3.85562	6.53322	0.0105878	0.12098
HORVU2Hr1G120470	1.12541	0.702753	6.53278	0.0105904	0.12098
HORVU5Hr1G061770	-0.547667	11.4341	6.53237	0.0105929	0.12098
HORVU4Hr1G010120	-0.568641	8.04552	6.52946	0.0106102	0.121092
HORVU5Hr1G067110	0.701399	4.39736	6.52234	0.0106528	0.121491
HORVU3Hr1G117550	1.0043	3.76228	6.51778	0.0106801	0.121687
HORVU7Hr1G087900	1.18545	1.8993	6.51549	0.0106939	0.121687
HORVU3Hr1G100530	0.718579	3.4949	6.51534	0.0106948	0.121687
HORVU5Hr1G102240	-1.01517	5.92222	6.51445	0.0107002	0.121687
HORVU6Hr1G058560	0.690842	6.25339	6.51315	0.010708	0.12169
HORVU4Hr1G048990	-0.581186	5.46216	6.50982	0.010728	0.121832
HORVU2Hr1G036840	-0.513141	5.32111	6.50786	0.0107399	0.121863
HORVU5Hr1G023720	2.09404	0.537983	6.50685	0.010746	0.121863
HORVU4Hr1G002270	1.25601	6.08763	6.50526	0.0107556	0.121887
HORVU3Hr1G065840	0.610587	3.71068	6.49718	0.0108046	0.122314
HORVU2Hr1G118690	0.544672	4.67471	6.49613	0.0108109	0.122314
HORVU3Hr1G028780	0.803989	4.95421	6.49419	0.0108228	0.122314
HORVU1Hr1G092150	1.58258	-0.0866468	6.49329	0.0108283	0.122314
HORVU5Hr1G081070	0.874976	2.31445	6.49265	0.0108321	0.122314
HORVU5Hr1G064260	0.976467	2.21202	6.49048	0.0108453	0.122314
HORVU2Hr1G019200	-0.552212	5.42282	6.48647	0.0108698	0.122314
HORVU7Hr1G037870	0.581898	5.51998	6.48626	0.0108712	0.122314
HORVU6Hr1G019350	-1.06771	2.77251	6.48587	0.0108735	0.122314
HORVU4Hr1G066290	0.584083	4.65847	6.48543	0.0108762	0.122314
HORVU2Hr1G104570	0.752259	2.33191	6.48531	0.010877	0.122314
HORVU2Hr1G107350	0.971598	1.8265	6.48123	0.010902	0.12251
HORVU4Hr1G014130	0.850965	6.26518	6.47405	0.0109461	0.12292
HORVU7Hr1G089530	2.38286	2.01986	6.47038	0.0109687	0.123078
HORVU6Hr1G090530	-1.37051	0.740233	6.46928	0.0109755	0.123078
HORVU1Hr1G005980	0.579606	3.96095	6.46131	0.0110248	0.123542
HORVU5Hr1G092630	0.63371	7.03216	6.46013	0.0110322	0.123542
HORVU2Hr1G025160	-0.837618	6.8811	6.45797	0.0110456	0.123563
HORVU6Hr1G059290	0.964923	3.14683	6.45735	0.0110494	0.123563
HORVU4Hr1G000620	0.581181	4.72113	6.45139	0.0110865	0.123892
HORVU7Hr1G106150	0.576261	8.78585	6.43644	0.0111802	0.124792
HORVU5Hr1G092190	1.52873	0.89053	6.43607	0.0111826	0.124792
HORVU1Hr1G043900	-0.812982	10.1412	6.43435	0.0111934	0.124827
HORVU1Hr1G019630	1.03432	0.933782	6.43242	0.0112056	0.124876
HORVU3Hr1G078840	1.09762	2.13624	6.42956	0.0112236	0.12499
HORVU2Hr1G086360	0.697901	6.93375	6.42359	0.0112614	0.125324
HORVU3Hr1G058170	0.868146	3.13819	6.41837	0.0112946	0.125522
HORVU5Hr1G047540	-0.51328	7.20834	6.41815	0.011296	0.125522
HORVU5Hr1G104390	0.596016	5.93948	6.41711	0.0113026	0.125522
HORVU2Hr1G009580	0.754155	5.59371	6.41288	0.0113296	0.125735
HORVU2Hr1G102610	0.946213	5.93076	6.4096	0.0113505	0.12588
HORVU7Hr1G072980	-0.658178	3.40933	6.40761	0.0113633	0.125899
HORVU5Hr1G029060	-0.859934	1.58276	6.40686	0.0113681	0.125899
HORVU6Hr1G006840	-0.71935	5.86618	6.40567	0.0113757	0.125899
HORVU5Hr1G077390	-1.25095	1.62168	6.40003	0.0114119	0.126213
HORVU5Hr1G124750	-0.82576	2.37896	6.39717	0.0114303	0.126329
HORVU5Hr1G077450	-0.842823	2.43133	6.39361	0.0114532	0.126476
HORVU5Hr1G061870	0.571499	5.27744	6.39267	0.0114592	0.126476
HORVU7Hr1G022310	1.21343	1.89743	6.39029	0.0114746	0.126559
HORVU7Hr1G027930	0.987714	3.36104	6.37909	0.0115473	0.127269
HORVU7Hr1G069460	0.605184	7.78978	6.37794	0.0115548	0.127269
HORVU0Hr1G003000	2.04311	0.353745	6.37591	0.011568	0.127327
HORVU0Hr1G017400	-0.883146	5.68285	6.37279	0.0115883	0.127464
ENSRNA049486926	1.06107	0.490131	6.3715	0.0115968	0.127469
HORVU3Hr1G070700	1.72005	3.85655	6.3622	0.0116577	0.128051
HORVU5Hr1G101000	1.12076	0.490704	6.35824	0.0116837	0.12825
HORVU3Hr1G087050	1.22458	6.47063	6.3511	0.0117309	0.128611
HORVU5Hr1G103180	0.470391	5.61877	6.35067	0.0117337	0.128611
HORVU2Hr1G122930	1.76683	-0.783176	6.34963	0.0117406	0.128611
HORVU1Hr1G058000	-0.644433	4.21224	6.34656	0.0117609	0.128659
HORVU1Hr1G080160	1.84334	1.2481	6.34656	0.0117609	0.128659
HORVU4Hr1G014670	2.01303	2.98645	6.34488	0.011772	0.128693
HORVU4Hr1G076330	-0.494141	5.32125	6.34163	0.0117937	0.128842
HORVU5Hr1G040610	1.03121	0.868428	6.33964	0.0118069	0.128898
HORVU4Hr1G071300	0.937644	3.63497	6.33666	0.0118267	0.129028
HORVU5Hr1G106440	0.491004	6.93067	6.3332	0.0118498	0.129145
HORVU7Hr1G028220	-0.551886	4.43509	6.33204	0.0118576	0.129145
HORVU7Hr1G105370	0.626616	3.27234	6.33144	0.0118616	0.129145
HORVU7Hr1G099910	0.733461	2.48068	6.32878	0.0118794	0.129229
HORVU4Hr1G071140	-1.12046	0.255936	6.3279	0.0118853	0.129229
HORVU6Hr1G012270	-2.05038	6.98586	6.32605	0.0118977	0.129276
HORVU2Hr1G017880	0.978187	2.94103	6.3247	0.0119068	0.129287
HORVU7Hr1G071240	0.707772	5.95323	6.32064	0.0119341	0.129353
HORVU4Hr1G063730	-1.41308	1.3289	6.32054	0.0119348	0.129353
HORVU6Hr1G092020	2.2645	1.64074	6.32022	0.0119369	0.129353
HORVU2Hr1G099230	0.702198	7.5363	6.31812	0.011951	0.129377
HORVU5Hr1G076280	1.17196	0.513925	6.31709	0.011958	0.129377
HORVU3Hr1G105820	0.684526	3.80651	6.31631	0.0119632	0.129377
HORVU3Hr1G092990	0.948835	1.37515	6.31171	0.0119943	0.12951
HORVU3Hr1G026330	1.47948	1.43114	6.31099	0.0119992	0.12951
HORVU2Hr1G122920	-1.1113	1.02561	6.31091	0.0119997	0.12951
HORVU4Hr1G039130	-0.848339	2.02967	6.30938	0.0120101	0.129535
HORVU7Hr1G100170	0.860992	1.79326	6.29794	0.0120878	0.130286
HORVU3Hr1G013810	-0.509811	7.16807	6.29667	0.0120965	0.130293
HORVU3Hr1G079620	0.919471	4.97393	6.29305	0.0121213	0.130315
HORVU3Hr1G080100	1.43323	3.48445	6.29257	0.0121245	0.130315
HORVU2Hr1G060680	-0.712453	7.15152	6.29196	0.0121287	0.130315
HORVU3Hr1G068840	-0.474982	7.42783	6.29082	0.0121365	0.130315
HORVU2Hr1G088380	1.10727	0.843228	6.28971	0.0121441	0.130315
HORVU0Hr1G022580	0.568908	4.6246	6.28925	0.0121472	0.130315
HORVU6Hr1G076340	1.62898	-0.0354974	6.2837	0.0121853	0.130637
HORVU1Hr1G030040	0.684676	3.45246	6.28063	0.0122065	0.130777
HORVU4Hr1G090660	0.86257	2.79136	6.27726	0.0122297	0.1308
HORVU3Hr1G064680	2.3683	2.45367	6.27599	0.0122384	0.1308
HORVU5Hr1G107290	1.24931	2.03978	6.27583	0.0122396	0.1308
HORVU2Hr1G034270	-0.570372	5.9664	6.27477	0.0122469	0.1308
HORVU2Hr1G017290	-0.644376	3.81836	6.27442	0.0122493	0.1308
HORVU6Hr1G014060	1.07533	0.231892	6.26161	0.0123382	0.131662
HORVU5Hr1G089740	1.2042	-0.0351394	6.25896	0.0123567	0.131772
HORVU4Hr1G000590	0.678374	3.38756	6.25175	0.0124071	0.13203
HORVU4Hr1G084390	0.909701	3.02957	6.25056	0.0124154	0.13203
HORVU5Hr1G084580	1.12722	1.7227	6.25056	0.0124154	0.13203
HORVU5Hr1G007050	0.736734	3.23879	6.25023	0.0124177	0.13203
HORVU3Hr1G071320	0.915956	2.61588	6.24964	0.0124219	0.13203
HORVU6Hr1G069190	-0.582515	8.50579	6.24756	0.0124365	0.132097
HORVU7Hr1G035870	-0.490781	8.33984	6.24515	0.0124534	0.13219
HORVU6Hr1G043280	-0.541167	4.62608	6.24352	0.0124648	0.132224
HORVU6Hr1G015850	0.794237	2.9635	6.24021	0.0124882	0.132385
HORVU5Hr1G019650	-0.894124	3.94207	6.23871	0.0124987	0.132409
HORVU2Hr1G043960	-1.20542	1.80169	6.23069	0.0125555	0.132784
HORVU2Hr1G032400	-0.553226	7.27951	6.23042	0.0125574	0.132784
HORVU6Hr1G040600	-0.481898	5.53675	6.23021	0.0125589	0.132784
HORVU2Hr1G127720	0.534474	4.88664	6.22788	0.0125754	0.132861
HORVU1Hr1G039160	0.994356	5.97498	6.22686	0.0125826	0.132861
HORVU3Hr1G055260	-1.05627	3.45669	6.22439	0.0126002	0.132959
HORVU6Hr1G009400	0.801407	7.15921	6.21288	0.0126824	0.133711
HORVU7Hr1G078670	0.944264	2.49857	6.21209	0.0126881	0.133711
HORVU7Hr1G121290	2.81361	1.99746	6.20912	0.0127094	0.133762
HORVU2Hr1G124400	0.744051	5.65046	6.2089	0.012711	0.133762
HORVU4Hr1G017030	-0.596355	7.79711	6.20794	0.0127178	0.133762
HORVU3Hr1G107020	0.743343	3.59668	6.20537	0.0127363	0.133869
HORVU1Hr1G063250	0.886998	2.74799	6.20327	0.0127514	0.13394
HORVU4Hr1G002650	3.57776	4.259	6.20175	0.0127624	0.133968
HORVU7Hr1G099340	1.33383	5.08935	6.19969	0.0127772	0.134035
HORVU7Hr1G077790	-0.518484	6.23915	6.19753	0.0127929	0.134035
HORVU1Hr1G020690	-3.62974	6.29219	6.1974	0.0127938	0.134035
HORVU4Hr1G012400	-0.487567	5.11781	6.19554	0.0128073	0.134089
HORVU7Hr1G056790	-0.577543	7.30694	6.19269	0.0128279	0.134218
HORVU3Hr1G057550	0.956771	2.20337	6.18666	0.0128717	0.134588
HORVU2Hr1G118570	0.934557	3.4964	6.18352	0.0128946	0.13474
HORVU3Hr1G019750	-1.74723	3.25063	6.17664	0.0129448	0.135177
HORVU2Hr1G090660	1.01381	2.81933	6.17445	0.0129608	0.135256
HORVU2Hr1G016440	0.67454	3.87465	6.17079	0.0129877	0.135449
HORVU3Hr1G090690	-0.538154	4.56349	6.16738	0.0130127	0.135593
HORVU3Hr1G094220	-0.512492	6.81566	6.16661	0.0130184	0.135593
HORVU4Hr1G004270	1.07005	3.04283	6.16347	0.0130415	0.135746
HORVU5Hr1G058160	0.678402	4.35028	6.16096	0.01306	0.135851
HORVU1Hr1G013900	-0.744114	8.26287	6.1566	0.0130923	0.136099
HORVU3Hr1G091460	1.0707	-0.143886	6.15302	0.0131188	0.136195
HORVU5Hr1G076290	1.12139	0.549065	6.15182	0.0131277	0.136195
HORVU6Hr1G082340	0.473672	5.45751	6.15115	0.0131326	0.136195
HORVU3Hr1G049060	-0.586562	8.06969	6.15034	0.0131387	0.136195
HORVU5Hr1G073330	0.747267	4.81629	6.14964	0.0131439	0.136195
HORVU5Hr1G045580	-0.728586	2.86012	6.14832	0.0131537	0.136209
HORVU2Hr1G029830	1.14423	0.275195	6.14704	0.0131632	0.13622
HORVU6Hr1G053640	0.5544	5.37696	6.13877	0.0132249	0.136771
HORVU3Hr1G028670	-0.676655	4.4579	6.13452	0.0132568	0.137012
HORVU3Hr1G020470	-0.468152	7.22223	6.13292	0.0132687	0.137048
HORVU2Hr1G070720	-0.659325	5.19599	6.12929	0.013296	0.137241
HORVU1Hr1G024580	-0.581091	7.69493	6.12743	0.01331	0.137298
HORVU6Hr1G028150	-1.192	2.67487	6.1218	0.0133525	0.137648
HORVU7Hr1G099390	0.894264	5.40847	6.11852	0.0133773	0.137815
HORVU3Hr1G114900	2.56009	0.160756	6.11685	0.01339	0.137833
HORVU6Hr1G089470	0.484078	4.88097	6.11602	0.0133962	0.137833
HORVU2Hr1G090310	-0.644027	5.41933	6.11482	0.0134053	0.137839
HORVU2Hr1G089020	1.13432	4.54484	6.11167	0.0134292	0.137867
HORVU6Hr1G081000	0.975408	4.70263	6.11068	0.0134367	0.137867
HORVU2Hr1G113270	-0.705177	7.23641	6.11026	0.0134399	0.137867
HORVU6Hr1G022280	1.69347	0.939831	6.10861	0.0134525	0.137867
HORVU3Hr1G068270	0.865157	3.3394	6.10798	0.0134573	0.137867
HORVU7Hr1G037960	0.496836	5.30707	6.1077	0.0134594	0.137867
HORVU2Hr1G094140	-0.645271	3.32516	6.10422	0.0134859	0.138051
HORVU5Hr1G057610	0.567313	3.76858	6.1017	0.0135052	0.13816
HORVU0Hr1G003110	-1.08912	1.23766	6.09934	0.0135232	0.138257
HORVU5Hr1G125350	-0.693997	4.05685	6.09179	0.0135812	0.138761
HORVU2Hr1G021950	0.518943	4.84647	6.0896	0.013598	0.138845
HORVU6Hr1G083440	-0.536619	4.48948	6.08022	0.0136703	0.139495
HORVU7Hr1G116180	0.574273	3.54649	6.07722	0.0136936	0.139556
HORVU7Hr1G119870	0.978911	2.49377	6.07721	0.0136937	0.139556
HORVU3Hr1G110410	0.809084	2.22547	6.07501	0.0137108	0.139642
ENSRNA049486932	1.13302	1.56114	6.07331	0.0137239	0.139687
HORVU7Hr1G091880	3.56967	-0.016617	6.06919	0.013756	0.139842
HORVU4Hr1G088790	0.53981	4.14655	6.06912	0.0137565	0.139842
HORVU1Hr1G088560	0.658466	6.22542	6.06743	0.0137697	0.139888
HORVU7Hr1G009770	0.954571	1.64263	6.06007	0.0138272	0.140159
HORVU6Hr1G069940	1.67591	-0.020353	6.05988	0.0138287	0.140159
HORVU3Hr1G018690	0.746386	4.04915	6.05944	0.0138321	0.140159
HORVU3Hr1G084420	0.785245	3.22459	6.05903	0.0138354	0.140159
HORVU2Hr1G025630	0.707653	2.9453	6.05787	0.0138445	0.140159
HORVU6Hr1G074690	3.44767	2.5082	6.05704	0.013851	0.140159
HORVU3Hr1G089650	-0.703884	9.9392	6.05502	0.0138668	0.140159
HORVU7Hr1G048570	1.44297	3.55562	6.05379	0.0138765	0.140159
HORVU6Hr1G070420	-0.574341	7.22781	6.05314	0.0138816	0.140159
HORVU5Hr1G085530	0.49227	5.53343	6.0529	0.0138835	0.140159
HORVU7Hr1G027120	-0.723031	6.19045	6.04954	0.0139099	0.140338
HORVU5Hr1G098090	1.38277	2.1832	6.04839	0.013919	0.140341
HORVU0Hr1G024880	-1.14793	7.70767	6.04592	0.0139385	0.14045
HORVU2Hr1G021350	0.544254	4.62672	6.04228	0.0139672	0.140568
HORVU4Hr1G083970	0.445819	5.0257	6.04222	0.0139677	0.140568
HORVU1Hr1G060740	-0.501154	6.0572	6.04007	0.0139847	0.140597
HORVU6Hr1G019760	2.59234	1.27231	6.03843	0.0139978	0.140597
HORVU1Hr1G047000	-1.37938	-0.337676	6.03833	0.0139985	0.140597
HORVU5Hr1G122250	1.14835	0.0698434	6.03744	0.0140056	0.140597
HORVU2Hr1G108990	-0.523978	4.56741	6.03588	0.014018	0.140634
HORVU3Hr1G051050	1.37381	0.824717	6.02975	0.0140667	0.141035
HORVU2Hr1G036440	0.914741	2.25865	6.02731	0.0140862	0.141143
HORVU3Hr1G077530	-0.749658	4.94407	6.02496	0.014105	0.141243
HORVU7Hr1G041090	0.639355	3.66366	6.02375	0.0141146	0.141251
HORVU3Hr1G068410	-0.828794	2.84506	6.02224	0.0141267	0.141252
HORVU1Hr1G062900	0.649316	6.06523	6.02155	0.0141322	0.141252
HORVU2Hr1G126150	2.77793	0.362902	6.02008	0.014144	0.141282
HORVU0Hr1G023280	0.534932	5.33065	6.01788	0.0141616	0.14137
HORVU3Hr1G004850	1.06892	2.29143	6.01037	0.014222	0.141819
HORVU1Hr1G027700	1.42241	2.97294	6.0101	0.0142242	0.141819
HORVU2Hr1G022090	0.601795	7.9196	6.00743	0.0142457	0.141898
HORVU7Hr1G082910	0.544148	5.70817	6.00694	0.0142498	0.141898
HORVU2Hr1G111760	1.1773	4.11587	6.00502	0.0142652	0.141964
HORVU2Hr1G119900	0.930092	0.547448	6.00331	0.0142791	0.142014
HORVU2Hr1G047700	1.04002	0.767773	5.9996	0.0143091	0.142225
HORVU4Hr1G051740	-0.939916	3.95479	5.99736	0.0143273	0.142285
HORVU7Hr1G021840	-0.992657	4.7572	5.99668	0.0143328	0.142285
HORVU4Hr1G013640	1.01591	3.28158	5.98905	0.014395	0.142814
HORVU5Hr1G067910	-0.537147	5.47272	5.98739	0.0144085	0.14286
HORVU3Hr1G108500	1.09465	0.582209	5.98227	0.0144504	0.143187
HORVU6Hr1G028180	1.03898	1.42654	5.9801	0.0144682	0.143275
HORVU5Hr1G094270	-0.97977	2.83295	5.97576	0.0145038	0.143514
HORVU6Hr1G064720	0.750679	4.96368	5.97499	0.0145101	0.143514
HORVU1Hr1G091890	-0.516367	5.72687	5.9709	0.0145439	0.143736
HORVU6Hr1G067660	-0.682199	12.3321	5.9698	0.0145529	0.143736
HORVU3Hr1G074210	-0.52629	7.14656	5.96902	0.0145594	0.143736
HORVU2Hr1G042280	0.98311	1.40324	5.96205	0.014617	0.144216
HORVU4Hr1G049670	0.602448	7.8899	5.95693	0.0146596	0.144505
HORVU5Hr1G092170	-0.525863	8.32554	5.95563	0.0146703	0.144505
HORVU0Hr1G016310	1.70875	0.706093	5.95528	0.0146732	0.144505
HORVU6Hr1G090830	0.891887	1.65937	5.95333	0.0146895	0.144577
HORVU6Hr1G041610	-1.22513	0.412552	5.94741	0.0147389	0.144974
HORVU3Hr1G002920	0.641887	5.15934	5.941	0.0147926	0.145414
HORVU2Hr1G010870	0.593077	7.27505	5.9386	0.0148128	0.145523
HORVU5Hr1G092310	1.34246	1.65135	5.93543	0.0148394	0.145696
HORVU1Hr1G081920	1.1289	1.48196	5.93307	0.0148593	0.145749
HORVU6Hr1G020380	0.613715	6.94085	5.93264	0.0148629	0.145749
HORVU2Hr1G078840	-0.519848	10.9462	5.92611	0.0149182	0.146185
HORVU1Hr1G064210	0.874772	6.64785	5.92524	0.0149255	0.146185
HORVU1Hr1G002470	-0.748146	5.18601	5.92286	0.0149457	0.146293
HORVU0Hr1G031170	1.23182	0.0452045	5.92164	0.0149561	0.146306
HORVU1Hr1G072720	1.09239	2.52682	5.91686	0.0149967	0.146614
HORVU7Hr1G116190	-0.508262	5.24571	5.90966	0.0150581	0.147125
HORVU3Hr1G089020	0.730358	3.35015	5.90573	0.0150917	0.147345
HORVU6Hr1G069110	0.750679	3.54535	5.90489	0.0150989	0.147345
HORVU0Hr1G002950	-0.936174	0.706107	5.90274	0.0151173	0.14738
HORVU5Hr1G070880	0.887754	3.26153	5.90209	0.015123	0.14738
HORVU5Hr1G022130	0.694052	3.986	5.90123	0.0151303	0.14738
HORVU2Hr1G001600	0.589118	6.51417	5.89906	0.015149	0.14738
HORVU2Hr1G121340	1.45892	2.28495	5.89543	0.0151802	0.14738
HORVU4Hr1G074180	1.23682	-0.196703	5.8954	0.0151805	0.14738
HORVU7Hr1G106280	-0.795397	5.73529	5.89482	0.0151855	0.14738
HORVU3Hr1G097070	-0.674003	5.02169	5.89462	0.0151872	0.14738
HORVU4Hr1G065080	0.770351	6.07205	5.89331	0.0151985	0.14738
HORVU4Hr1G082740	-1.22329	-0.0280787	5.89289	0.0152021	0.14738
HORVU5Hr1G037540	-0.474525	7.3371	5.89276	0.0152033	0.14738
HORVU2Hr1G123480	2.3154	1.21967	5.89108	0.0152177	0.147428
HORVU1Hr1G083490	-1.69273	-0.237785	5.89007	0.0152265	0.147428
HORVU4Hr1G058360	0.719391	3.95765	5.88487	0.0152715	0.147775
HORVU7Hr1G001830	-0.480238	6.58028	5.88211	0.0152955	0.147918
HORVU5Hr1G062370	-0.628936	7.75783	5.88045	0.0153099	0.147969
HORVU7Hr1G106540	0.876502	2.68837	5.87376	0.0153682	0.14843
HORVU3Hr1G071270	0.614296	3.9076	5.87258	0.0153785	0.14843
HORVU2Hr1G036780	0.772322	6.6127	5.8718	0.0153854	0.14843
HORVU2Hr1G010890	0.723614	6.27811	5.86979	0.0154029	0.148467
HORVU4Hr1G068710	-0.462498	6.46264	5.86894	0.0154103	0.148467
HORVU7Hr1G063030	0.585224	6.29237	5.86747	0.0154232	0.148467
HORVU7Hr1G029560	1.528	1.1387	5.86714	0.0154261	0.148467
HORVU6Hr1G012690	-0.691731	3.90626	5.85776	0.0155085	0.149117
HORVU4Hr1G043530	0.622326	5.98616	5.85734	0.0155122	0.149117
HORVU3Hr1G056370	-1.12079	3.50021	5.85471	0.0155354	0.14917
HORVU7Hr1G038900	2.33806	-0.289304	5.85461	0.0155363	0.14917
HORVU4Hr1G055860	-0.645944	5.31122	5.85266	0.0155535	0.149215
HORVU7Hr1G043760	-0.781841	2.85769	5.85163	0.0155626	0.149215
HORVU7Hr1G055540	1.04627	0.742257	5.85094	0.0155687	0.149215
HORVU6Hr1G074180	-0.757193	2.7456	5.84749	0.0155993	0.149329
HORVU5Hr1G124630	-0.73685	4.89197	5.8465	0.015608	0.149329
HORVU3Hr1G028020	1.68857	1.81613	5.84645	0.0156085	0.149329
HORVU5Hr1G111510	0.585512	4.10619	5.84436	0.015627	0.149418
HORVU1Hr1G087970	1.06697	0.395248	5.84221	0.0156462	0.149512
HORVU1Hr1G023660	0.937365	6.55879	5.84103	0.0156567	0.149523
HORVU6Hr1G004830	-1.09921	0.155302	5.83517	0.0157089	0.149933
HORVU2Hr1G098980	1.95397	0.954058	5.831	0.0157462	0.150186
HORVU6Hr1G042410	-0.464964	5.88894	5.83012	0.0157541	0.150186
HORVU2Hr1G057430	0.742325	6.92751	5.8283	0.0157704	0.150253
HORVU7Hr1G055880	1.21735	-0.0141727	5.82644	0.015787	0.150322
HORVU6Hr1G052560	0.65232	3.69972	5.81769	0.0158657	0.150983
HORVU7Hr1G098410	-0.683242	2.85303	5.81569	0.0158838	0.151013
HORVU2Hr1G121350	1.05995	2.02147	5.81432	0.0158962	0.151013
HORVU4Hr1G008210	-0.705496	7.43596	5.81422	0.0158971	0.151013
HORVU1Hr1G003270	0.613693	3.73596	5.81145	0.0159221	0.151154
HORVU3Hr1G019840	0.710585	6.12637	5.8105	0.0159307	0.151154
HORVU5Hr1G066250	1.15302	9.13938	5.80763	0.0159568	0.151185
HORVU1Hr1G006890	0.594502	3.55927	5.80705	0.015962	0.151185
HORVU1Hr1G048580	-0.75757	4.96356	5.80703	0.0159622	0.151185
HORVU2Hr1G066200	1.02738	0.0479052	5.80318	0.0159972	0.151428
HORVU7Hr1G057310	-0.474829	5.28283	5.79894	0.0160358	0.151704
HORVU6Hr1G058820	-1.72016	1.74202	5.79256	0.0160941	0.152148
HORVU2Hr1G069110	-0.505184	7.42702	5.79174	0.0161016	0.152148
HORVU1Hr1G073080	-1.3462	-0.283687	5.78783	0.0161375	0.152397
HORVU3Hr1G032490	-0.685091	10.8033	5.78576	0.0161565	0.152487
HORVU1Hr1G039220	-1.4589	1.04493	5.77062	0.0162963	0.153716
HORVU1Hr1G051500	0.832738	1.8101	5.76496	0.0163488	0.154041
HORVU6Hr1G090250	-0.723481	7.43811	5.76485	0.0163499	0.154041
HORVU3Hr1G059140	-0.466086	7.46635	5.76228	0.0163738	0.154139
HORVU1Hr1G029920	-0.603329	6.21651	5.76168	0.0163794	0.154139
HORVU4Hr1G013310	-0.568397	6.81849	5.75511	0.0164408	0.154577
HORVU7Hr1G099560	-0.663054	4.57263	5.75368	0.0164542	0.154577
HORVU6Hr1G077470	1.00391	0.389456	5.75361	0.0164548	0.154577
HORVU5Hr1G100770	-0.451401	8.17857	5.7508	0.0164812	0.154655
HORVU2Hr1G086380	0.66272	5.42273	5.74977	0.0164908	0.154655
HORVU1Hr1G003990	0.817588	2.24873	5.74966	0.0164919	0.154655
HORVU2Hr1G012460	-2.49895	3.87116	5.74769	0.0165104	0.154738
HORVU5Hr1G013510	-1.11864	1.32476	5.74342	0.0165505	0.155024
HORVU3Hr1G056830	-0.714784	3.43772	5.74224	0.0165617	0.155038
HORVU5Hr1G107330	0.976024	0.311971	5.73184	0.01666	0.155868
ENSRNA049486922	1.26907	0.205084	5.72857	0.0166911	0.156004
HORVU5Hr1G113970	0.609019	3.86846	5.72796	0.0166968	0.156004
HORVU1Hr1G067230	1.24435	1.61091	5.72725	0.0167036	0.156004
HORVU2Hr1G077230	-0.517779	7.01684	5.72208	0.0167528	0.156256
HORVU6Hr1G069440	-1.1427	1.20012	5.72053	0.0167677	0.156256
HORVU5Hr1G120300	-1.26068	4.1547	5.72046	0.0167683	0.156256
HORVU3Hr1G115820	0.794296	7.48855	5.72034	0.0167694	0.156256
HORVU1Hr1G065970	1.23974	0.689066	5.71575	0.0168133	0.156574
HORVU3Hr1G006620	2.41139	5.66862	5.71247	0.0168449	0.156632
HORVU2Hr1G046380	0.503263	5.98736	5.71208	0.0168485	0.156632
HORVU2Hr1G065430	-0.992072	1.58152	5.71206	0.0168488	0.156632
HORVU3Hr1G110890	-0.76064	1.99406	5.70806	0.0168872	0.156884
HORVU7Hr1G001670	-0.635622	4.55634	5.70647	0.0169025	0.156884
HORVU4Hr1G017450	-0.473468	8.28813	5.7062	0.0169051	0.156884
HORVU6Hr1G091300	0.663244	3.52264	5.69944	0.0169703	0.157285
HORVU5Hr1G018840	-0.591322	8.34402	5.69942	0.0169706	0.157285
HORVU5Hr1G019000	-0.609479	6.61708	5.69868	0.0169777	0.157285
HORVU2Hr1G098010	-0.844118	3.41676	5.69424	0.0170207	0.157579
HORVU5Hr1G070810	-0.572966	5.11401	5.69339	0.0170289	0.157579
HORVU6Hr1G072510	0.460514	5.50376	5.68892	0.0170723	0.157804
HORVU1Hr1G062690	0.867812	4.31019	5.68886	0.0170729	0.157804
HORVU4Hr1G011670	-0.607838	4.5825	5.68399	0.0171204	0.158071
HORVU6Hr1G085120	-0.719099	2.67484	5.6838	0.0171222	0.158071
HORVU5Hr1G065680	-0.53488	5.59889	5.68288	0.0171312	0.158071
HORVU2Hr1G118930	1.13409	0.221954	5.67984	0.0171609	0.158254
HORVU2Hr1G101950	-0.798488	3.21523	5.67724	0.0171864	0.158398
HORVU1Hr1G024710	0.640112	8.26948	5.67596	0.017199	0.158423
HORVU7Hr1G074840	-0.481516	6.3541	5.67261	0.0172318	0.158635
HORVU4Hr1G078610	0.708528	4.09115	5.66637	0.0172932	0.159041
HORVU7Hr1G027270	-0.809119	4.21656	5.66613	0.0172956	0.159041
HORVU6Hr1G069340	-2.22089	3.15254	5.66397	0.0173169	0.15913
HORVU7Hr1G012920	-0.546232	6.401	5.66314	0.0173251	0.15913
HORVU7Hr1G077170	-0.485712	5.89387	5.65953	0.0173607	0.159366
HORVU2Hr1G116130	0.692179	4.21738	5.65686	0.0173872	0.159519
HORVU6Hr1G009480	-0.558953	8.14943	5.65562	0.0173996	0.15954
HORVU2Hr1G091840	0.603142	4.41863	5.65462	0.0174094	0.15954
HORVU5Hr1G013260	-1.0095	1.89755	5.65284	0.0174272	0.159612
HORVU6Hr1G025110	-0.588141	7.15988	5.64907	0.0174646	0.159864
HORVU6Hr1G051860	-1.37901	5.17257	5.64739	0.0174814	0.159926
HORVU7Hr1G122100	4.11672	1.94969	5.64631	0.0174921	0.159934
HORVU3Hr1G033550	0.970687	5.55118	5.64526	0.0175026	0.159938
HORVU1Hr1G023160	-1.19027	2.77878	5.63962	0.017559	0.160363
HORVU5Hr1G047980	0.468831	5.95206	5.63573	0.017598	0.160628
HORVU1Hr1G058440	0.878677	1.62135	5.63195	0.017636	0.160883
HORVU1Hr1G063380	1.37416	0.978535	5.6292	0.0176637	0.161045
HORVU5Hr1G119260	0.943247	3.19173	5.62742	0.0176816	0.161117
HORVU1Hr1G030060	1.20377	1.21627	5.6257	0.017699	0.161184
HORVU5Hr1G105970	0.559854	3.85485	5.62414	0.0177148	0.161237
HORVU6Hr1G013710	2.94241	5.01364	5.62069	0.0177497	0.161463
HORVU3Hr1G040590	0.465653	4.64031	5.61916	0.0177651	0.161484
HORVU2Hr1G106850	-0.545113	4.45762	5.61847	0.0177721	0.161484
HORVU6Hr1G074030	-0.654948	9.04375	5.60724	0.0178864	0.162431
HORVU5Hr1G026160	-0.709799	3.3362	5.60403	0.0179192	0.162627
HORVU4Hr1G049150	0.44955	7.10475	5.60276	0.0179322	0.162627
HORVU6Hr1G077280	0.705814	3.00028	5.60157	0.0179444	0.162627
HORVU3Hr1G089490	-0.524098	5.37769	5.60118	0.0179484	0.162627
HORVU7Hr1G049380	0.918679	0.724258	5.59993	0.0179612	0.162651
HORVU1Hr1G072270	0.822539	7.18954	5.596	0.0180015	0.162925
HORVU1Hr1G031250	-0.574932	5.29998	5.59101	0.0180529	0.163298
HORVU7Hr1G055440	-0.728806	3.36502	5.58924	0.0180712	0.163325
HORVU7Hr1G073570	0.495156	4.69843	5.58709	0.0180934	0.163325
HORVU4Hr1G056770	-1.67621	0.157733	5.58658	0.0180986	0.163325
HORVU5Hr1G071060	0.570696	3.70406	5.58549	0.0181099	0.163325
HORVU6Hr1G076380	0.995757	2.055	5.58534	0.0181114	0.163325
HORVU1Hr1G017740	-1.16674	0.7517	5.58483	0.0181167	0.163325
HORVU7Hr1G034290	1.29598	3.57139	5.58366	0.0181288	0.163342
HORVU5Hr1G007770	0.893028	3.78192	5.57652	0.0182028	0.163917
HORVU7Hr1G030210	-1.51464	0.0762561	5.57423	0.0182267	0.163918
HORVU1Hr1G050900	-0.48084	6.77595	5.57288	0.0182408	0.163918
HORVU0Hr1G001430	1.79802	3.80379	5.57266	0.018243	0.163918
HORVU7Hr1G120130	-0.62485	4.37878	5.57193	0.0182507	0.163918
HORVU7Hr1G054010	0.556367	6.34907	5.57162	0.0182539	0.163918
HORVU4Hr1G084510	1.0197	4.54019	5.56554	0.0183173	0.164321
HORVU6Hr1G063830	-0.531491	7.83311	5.56536	0.0183192	0.164321
HORVU2Hr1G103780	1.32234	0.444543	5.56218	0.0183526	0.164494
HORVU7Hr1G103870	-0.600702	4.52231	5.56157	0.0183589	0.164494
HORVU3Hr1G038050	1.18569	5.20032	5.55646	0.0184126	0.164884
HORVU2Hr1G043680	-0.656661	6.7958	5.55206	0.018459	0.165074
HORVU5Hr1G080030	1.03906	0.827385	5.55161	0.0184637	0.165074
HORVU5Hr1G101600	0.823316	5.60719	5.55152	0.0184646	0.165074
HORVU2Hr1G090100	-1.3417	0.526124	5.54857	0.0184958	0.165245
ENSRNA049482248	-1.25679	0.251961	5.54777	0.0185043	0.165245
HORVU4Hr1G024790	0.447572	4.90654	5.54662	0.0185164	0.165262
HORVU5Hr1G093410	-1.50084	0.998465	5.544	0.0185441	0.165417
HORVU7Hr1G047150	-1.10582	3.74917	5.54076	0.0185785	0.165632
HORVU6Hr1G088960	2.2911	2.04634	5.53911	0.018596	0.165696
HORVU2Hr1G095220	0.879503	2.2949	5.53535	0.0186361	0.16588
HORVU5Hr1G053010	1.22988	0.693023	5.53523	0.0186373	0.16588
HORVU2Hr1G124350	0.965776	0.998964	5.53127	0.0186795	0.16609
HORVU6Hr1G078060	0.938728	1.46707	5.53108	0.0186816	0.16609
HORVU6Hr1G007020	0.545867	4.4241	5.52714	0.0187237	0.16637
HORVU4Hr1G026330	0.475148	5.72691	5.52621	0.0187336	0.16637
HORVU5Hr1G108670	1.67878	3.35581	5.52391	0.0187583	0.166496
HORVU5Hr1G109610	-1.43414	1.51329	5.52122	0.0187872	0.166661
HORVU7Hr1G033430	1.46381	0.958182	5.51996	0.0188007	0.166687
HORVU5Hr1G043190	0.461133	5.85196	5.51902	0.0188108	0.166687
HORVU3Hr1G000700	1.57926	0.96414	5.51742	0.018828	0.166747
HORVU5Hr1G027100	-0.478633	6.5561	5.51388	0.0188662	0.166982
HORVU5Hr1G121120	0.824702	1.6921	5.51304	0.0188752	0.166982
HORVU3Hr1G065960	-0.689827	7.00866	5.51126	0.0188944	0.16706
HORVU2Hr1G118910	1.03241	2.71561	5.50977	0.0189106	0.167104
HORVU7Hr1G087770	1.27469	-0.26563	5.50874	0.0189217	0.167104
HORVU1Hr1G062290	-0.611003	4.72079	5.50792	0.0189306	0.167104
HORVU2Hr1G105090	-1.10035	3.17492	5.50652	0.0189457	0.167146
HORVU5Hr1G020320	-0.864663	2.11542	5.50504	0.0189617	0.167196
HORVU1Hr1G085550	0.907278	3.30549	5.50341	0.0189794	0.16726
HORVU6Hr1G023040	-0.790642	3.65924	5.49844	0.0190335	0.167645
HORVU1Hr1G024400	-0.674694	9.47146	5.49593	0.0190608	0.167793
HORVU4Hr1G023260	-1.14492	1.9881	5.49426	0.019079	0.167862
HORVU6Hr1G011850	1.11466	1.48369	5.49195	0.0191042	0.167991
HORVU3Hr1G061410	-0.844619	3.31056	5.4901	0.0191244	0.168078
HORVU5Hr1G067010	0.908621	3.858	5.4874	0.019154	0.168246
HORVU5Hr1G097940	-0.52989	8.97889	5.4839	0.0191924	0.16844
HORVU2Hr1G028060	0.519568	4.5755	5.48259	0.0192068	0.16844
HORVU4Hr1G072880	1.72544	-0.2577	5.48252	0.0192075	0.16844
HORVU4Hr1G077480	0.740519	5.06864	5.48076	0.0192269	0.168518
HORVU4Hr1G088860	0.602996	4.1804	5.47843	0.0192525	0.168533
HORVU2Hr1G094320	0.550892	4.34808	5.47798	0.0192575	0.168533
HORVU2Hr1G013680	0.539506	9.83795	5.47775	0.01926	0.168533
HORVU7Hr1G018690	1.04608	1.57784	5.47595	0.0192799	0.168615
HORVU6Hr1G027050	0.454753	4.60047	5.47481	0.0192924	0.168633
HORVU7Hr1G038980	-1.78247	0.584126	5.47371	0.0193046	0.168648
HORVU5Hr1G080350	-2.02251	1.73036	5.47177	0.019326	0.168675
HORVU5Hr1G016840	-0.493257	7.02184	5.47077	0.0193371	0.168675
HORVU7Hr1G093380	-0.501287	5.65886	5.47059	0.0193391	0.168675
HORVU0Hr1G021230	0.503748	5.99145	5.46742	0.0193742	0.168889
HORVU2Hr1G102050	-2.41776	2.58742	5.46545	0.019396	0.168988
HORVU5Hr1G106110	0.885942	1.02744	5.46224	0.0194317	0.169122
HORVU6Hr1G016070	-0.524221	7.76397	5.46218	0.0194324	0.169122
HORVU3Hr1G040290	0.644431	4.17754	5.45603	0.0195009	0.169618
HORVU7Hr1G094120	0.878831	1.26593	5.45341	0.0195301	0.169618
HORVU4Hr1G077450	-0.458805	8.40513	5.45341	0.0195301	0.169618
HORVU7Hr1G020810	1.56269	0.578688	5.45329	0.0195315	0.169618
HORVU3Hr1G037330	-0.651681	6.46634	5.44982	0.0195703	0.169841
HORVU6Hr1G012820	0.762943	2.51687	5.4491	0.0195784	0.169841
HORVU3Hr1G114920	0.651173	3.54858	5.44741	0.0195973	0.169873
HORVU7Hr1G098280	-2.33558	0.288072	5.44689	0.0196032	0.169873
HORVU0Hr1G012410	-0.506075	6.40804	5.44299	0.019647	0.170161
HORVU7Hr1G062810	0.912807	2.91333	5.44071	0.0196727	0.170292
HORVU2Hr1G086320	0.936827	0.990961	5.43888	0.0196933	0.170379
HORVU1Hr1G081030	0.763257	4.03939	5.43745	0.0197094	0.17039
HORVU0Hr1G040200	-0.454852	7.8331	5.43689	0.0197157	0.17039
HORVU4Hr1G083470	1.2607	1.69316	5.43274	0.0197626	0.170703
HORVU3Hr1G047230	1.21032	1.59255	5.42732	0.0198241	0.171086
HORVU7Hr1G027910	-0.954999	1.82015	5.42696	0.0198282	0.171086
HORVU6Hr1G002240	0.531109	5.32327	5.42053	0.0199014	0.171597
HORVU6Hr1G019540	0.473651	5.08809	5.41953	0.0199127	0.171597
HORVU5Hr1G020580	0.476543	5.21496	5.41894	0.0199194	0.171597
HORVU6Hr1G086560	-0.658269	5.53524	5.4158	0.0199553	0.171647
HORVU5Hr1G070720	0.628613	9.18994	5.41578	0.0199555	0.171647
HORVU1Hr1G018370	1.33198	2.48437	5.41489	0.0199657	0.171647
HORVU5Hr1G008730	0.497391	5.09438	5.4147	0.0199679	0.171647
HORVU4Hr1G067840	1.40599	4.63676	5.41173	0.0200019	0.171848
HORVU3Hr1G097230	-0.423428	6.3122	5.40845	0.0200395	0.172078
HORVU3Hr1G045680	0.858359	1.8496	5.40668	0.0200599	0.172104
HORVU2Hr1G015110	0.818005	2.61055	5.4059	0.0200688	0.172104
HORVU2Hr1G022490	0.709235	3.7152	5.40468	0.0200829	0.172104
HORVU7Hr1G071450	0.455051	5.14719	5.40447	0.0200852	0.172104
HORVU2Hr1G082740	2.03656	4.14078	5.40344	0.0200972	0.172115
HORVU4Hr1G057360	-0.640075	4.02306	5.39955	0.0201419	0.172406
HORVU3Hr1G096830	-0.711878	5.72964	5.39743	0.0201664	0.172524
HORVU5Hr1G100700	0.749997	9.33566	5.3961	0.0201818	0.172564
HORVU1Hr1G084700	0.444067	5.12595	5.39301	0.0202175	0.172778
HORVU5Hr1G101500	0.838493	6.41961	5.38808	0.0202748	0.173166
HORVU2Hr1G101770	0.810935	1.49545	5.38724	0.0202845	0.173166
HORVU4Hr1G051450	1.16101	3.47131	5.38569	0.0203026	0.173228
HORVU2Hr1G110740	0.747333	1.90944	5.38324	0.0203311	0.17338
HORVU7Hr1G113270	1.04147	4.62667	5.38054	0.0203626	0.173422
HORVU6Hr1G093080	0.433693	5.4895	5.37946	0.0203751	0.173422
HORVU3Hr1G043930	-0.524721	7.30511	5.37936	0.0203764	0.173422
HORVU3Hr1G067620	-0.595775	6.54471	5.37912	0.0203791	0.173422
HORVU2Hr1G079700	0.757139	3.85301	5.37519	0.0204251	0.173617
HORVU4Hr1G046540	0.736399	7.87709	5.37447	0.0204335	0.173617
HORVU5Hr1G094870	1.14401	-0.0477539	5.37355	0.0204443	0.173617
HORVU1Hr1G089550	-1.77059	2.94214	5.37348	0.0204452	0.173617
HORVU5Hr1G105810	-0.561318	4.26613	5.36481	0.020547	0.17439
HORVU4Hr1G060770	-0.459851	4.83486	5.36228	0.0205768	0.17455
HORVU7Hr1G092360	0.782433	2.71618	5.36127	0.0205888	0.17456
HORVU3Hr1G074850	0.628132	5.68988	5.35968	0.0206075	0.174623
HORVU2Hr1G013870	-0.946204	9.56237	5.3588	0.0206179	0.174623
HORVU3Hr1G073470	-0.680353	8.49798	5.35656	0.0206445	0.174756
HORVU7Hr1G110930	0.435045	4.81007	5.35343	0.0206815	0.174908
HORVU4Hr1G027150	1.18694	0.733568	5.35321	0.0206841	0.174908
HORVU2Hr1G015360	-0.58189	4.4184	5.35121	0.0207079	0.175017
HORVU4Hr1G076840	1.15667	1.78669	5.34994	0.020723	0.17503
HORVU1Hr1G051800	1.30355	0.284232	5.34844	0.0207409	0.17503
HORVU3Hr1G089190	-0.851438	6.29819	5.34833	0.0207421	0.17503
HORVU6Hr1G085490	0.502851	4.19706	5.34527	0.0207786	0.175115
HORVU4Hr1G011750	0.837767	2.98573	5.34526	0.0207786	0.175115
HORVU6Hr1G031640	1.47641	3.931	5.34475	0.0207848	0.175115
HORVU1Hr1G010130	0.549836	5.09011	5.34012	0.02084	0.175475
HORVU2Hr1G078330	0.869994	2.10815	5.33934	0.0208493	0.175475
HORVU3Hr1G080130	0.68432	8.07013	5.336	0.0208894	0.17572
HORVU7Hr1G122120	3.81195	2.81773	5.33114	0.0209477	0.176072
HORVU2Hr1G036380	-0.60063	5.18163	5.33068	0.0209532	0.176072
HORVU1Hr1G087690	0.895844	6.47212	5.3268	0.0209999	0.176294
HORVU2Hr1G006280	-0.585239	7.44336	5.32555	0.021015	0.176294
HORVU2Hr1G100700	1.28287	0.440493	5.32529	0.0210181	0.176294
HORVU4Hr1G026570	0.66506	3.5331	5.32485	0.0210234	0.176294
HORVU4Hr1G051230	-0.524488	4.28052	5.32061	0.0210746	0.176631
HORVU5Hr1G053800	-1.02864	0.666607	5.31787	0.0211078	0.176773
HORVU5Hr1G045440	-0.525534	8.89271	5.31661	0.0211231	0.176773
HORVU1Hr1G058280	1.37792	0.96624	5.31628	0.0211271	0.176773
HORVU6Hr1G051470	-0.42524	6.683	5.31559	0.0211355	0.176773
HORVU2Hr1G081440	0.613158	3.20853	5.31449	0.0211487	0.176793
HORVU6Hr1G077430	-0.512459	4.30011	5.30996	0.0212038	0.177125
HORVU3Hr1G070540	-0.485759	6.60862	5.30941	0.0212105	0.177125
HORVU7Hr1G074170	0.851371	6.22374	5.30662	0.0212445	0.177317
HORVU7Hr1G027900	-1.89741	0.23961	5.30147	0.0213075	0.177742
HORVU3Hr1G054710	0.61365	3.24297	5.30048	0.0213196	0.177742
HORVU6Hr1G014780	0.918758	0.354902	5.29974	0.0213286	0.177742
HORVU6Hr1G086520	1.09175	-0.197839	5.29872	0.021341	0.177754
HORVU1Hr1G089680	-0.520968	5.8701	5.29525	0.0213837	0.178017
HORVU1Hr1G045670	-0.548455	6.03189	5.29222	0.0214209	0.178092
HORVU1Hr1G040720	0.785055	1.93499	5.29219	0.0214212	0.178092
HORVU6Hr1G051930	0.539191	7.19098	5.29181	0.021426	0.178092
HORVU2Hr1G102140	0.563074	4.91394	5.28461	0.0215147	0.178729
HORVU7Hr1G000860	1.27655	2.3346	5.28379	0.0215248	0.178729
HORVU6Hr1G036010	-0.493684	5.1248	5.2816	0.021552	0.178863
HORVU3Hr1G116740	0.966521	6.55778	5.27805	0.021596	0.179135
HORVU7Hr1G117020	-0.483369	6.39509	5.27631	0.0216175	0.179221
HORVU4Hr1G057070	0.93219	1.30569	5.26783	0.0217231	0.180004
HORVU1Hr1G024640	-1.00697	3.6901	5.26383	0.0217731	0.180326
HORVU5Hr1G027250	-0.452267	7.61148	5.26189	0.0217974	0.180383
HORVU7Hr1G082590	-0.585479	8.57327	5.26148	0.0218025	0.180383
HORVU7Hr1G028540	-0.425514	5.27754	5.25876	0.0218366	0.180501
HORVU7Hr1G021830	-0.464137	4.57842	5.25723	0.0218558	0.180501
HORVU1Hr1G073540	0.658387	3.75842	5.25696	0.0218591	0.180501
HORVU3Hr1G002420	-0.905565	1.9113	5.25677	0.0218615	0.180501
HORVU3Hr1G049640	1.25465	5.52699	5.25272	0.0219125	0.180829
HORVU4Hr1G057530	0.594034	3.6911	5.25146	0.0219284	0.180867
HORVU4Hr1G008870	1.32546	0.327042	5.24849	0.0219658	0.180996
HORVU4Hr1G015470	0.828466	1.2279	5.24844	0.0219665	0.180996
HORVU3Hr1G116350	-0.584576	4.90059	5.24731	0.0219807	0.181017
HORVU5Hr1G002320	1.3634	0.465546	5.24645	0.0219916	0.181017
HORVU2Hr1G025710	-0.517306	5.59929	5.24213	0.0220463	0.181375
HORVU7Hr1G118750	0.683673	2.83996	5.23849	0.0220924	0.181661
HORVU7Hr1G074430	0.669972	3.25819	5.23329	0.0221585	0.182036
HORVU3Hr1G004840	2.62155	0.537673	5.23313	0.0221606	0.182036
HORVU4Hr1G080810	-0.730758	6.62421	5.22722	0.022236	0.182562
HORVU4Hr1G063690	0.879289	1.34737	5.22375	0.0222804	0.182751
HORVU3Hr1G013180	-1.00814	2.95182	5.2233	0.0222863	0.182751
HORVU5Hr1G117450	1.0432	0.778845	5.22277	0.022293	0.182751
HORVU2Hr1G083430	1.36198	2.45823	5.21961	0.0223336	0.182872
HORVU4Hr1G023110	1.24763	2.00865	5.21943	0.0223359	0.182872
HORVU7Hr1G033030	0.698639	6.43631	5.21896	0.0223419	0.182872
HORVU1Hr1G073210	0.985804	3.14746	5.21556	0.0223856	0.183137
HORVU4Hr1G054600	-1.27564	1.92656	5.21081	0.0224468	0.183476
HORVU5Hr1G075500	0.723705	6.05323	5.21057	0.0224499	0.183476
HORVU4Hr1G007550	0.927732	4.04444	5.20915	0.0224683	0.183533
HORVU2Hr1G053670	-0.417104	6.52906	5.20776	0.0224862	0.183569
HORVU7Hr1G085500	0.562427	4.58972	5.20705	0.0224955	0.183569
HORVU5Hr1G071020	0.776121	2.12992	5.20469	0.022526	0.183652
HORVU1Hr1G056070	0.808916	1.78874	5.2045	0.0225285	0.183652
HORVU6Hr1G090700	-0.727142	5.09521	5.20245	0.0225551	0.183736
HORVU0Hr1G008700	-0.652711	6.26811	5.20194	0.0225617	0.183736
HORVU5Hr1G042390	-0.759383	3.69253	5.19968	0.0225911	0.183793
HORVU2Hr1G083410	1.80523	1.50328	5.19893	0.0226008	0.183793
HORVU3Hr1G023960	-0.502519	7.30122	5.19736	0.0226212	0.183793
HORVU2Hr1G064550	0.623738	5.16752	5.19674	0.0226293	0.183793
HORVU4Hr1G074600	0.904124	0.444192	5.19596	0.0226395	0.183793
HORVU3Hr1G104360	0.501599	4.63831	5.19541	0.0226466	0.183793
HORVU5Hr1G065170	-0.493234	8.32521	5.19526	0.0226486	0.183793
HORVU7Hr1G116310	1.11174	7.32346	5.1925	0.0226845	0.183991
HORVU5Hr1G047630	-1.6619	0.0916415	5.19134	0.0226997	0.183995
HORVU6Hr1G055820	-0.545399	6.5532	5.19072	0.0227078	0.183995
HORVU3Hr1G034570	1.12627	0.0172205	5.18442	0.0227903	0.18457
HORVU4Hr1G083840	0.680183	7.40752	5.17953	0.0228545	0.184997
HORVU1Hr1G014580	1.29325	0.0551369	5.17769	0.0228788	0.185101
HORVU1Hr1G025440	1.02301	2.51955	5.17297	0.022941	0.185438
HORVU7Hr1G018720	0.947022	1.96128	5.17278	0.0229435	0.185438
HORVU4Hr1G009310	1.13073	1.93204	5.17178	0.0229567	0.185451
HORVU2Hr1G067430	0.703206	2.89623	5.16987	0.0229819	0.185562
HORVU5Hr1G097500	1.43736	4.36082	5.16661	0.0230252	0.185818
HORVU6Hr1G003300	0.691722	4.23652	5.15963	0.0231178	0.186472
HORVU6Hr1G058630	2.07518	-0.470141	5.15722	0.02315	0.186638
HORVU5Hr1G088420	1.35169	1.65781	5.15016	0.0232443	0.187241
HORVU6Hr1G032170	-1.50135	0.822344	5.14988	0.023248	0.187241
HORVU2Hr1G125630	1.59013	-0.195502	5.14315	0.0233383	0.187857
[truncated: 14,093 more rows]

## Sheet: Hv.tol
geneID	logFC	logCPM	LR	PValue	FDR
HORVU3Hr1G078360	4.00026	3.22215	106.757	5.03214e-25	7.9372e-21
HORVU3Hr1G062430	-3.82187	4.05954	101.847	5.99729e-24	4.72976e-20
HORVU4Hr1G071020	-2.5387	6.37427	96.6478	8.28241e-23	4.35462e-19
HORVU3Hr1G059220	-2.99181	4.87809	95.2198	1.70376e-22	6.71837e-19
HORVU2Hr1G118060	-3.49295	3.84625	93.9265	3.27453e-22	1.03298e-18
HORVU2Hr1G090310	-1.85168	4.57845	90.6836	1.68582e-21	4.43175e-18
HORVU7Hr1G079600	-3.92706	3.44846	83.8109	5.4445e-20	1.2268e-16
HORVU5Hr1G122390	-5.21215	6.02724	81.9616	1.38756e-19	2.73575e-16
HORVU2Hr1G117940	-3.58276	2.679	81.1513	2.09086e-19	3.66435e-16
HORVU5Hr1G085680	-3.05068	3.51518	80.0368	3.67492e-19	5.79645e-16
HORVU3Hr1G027060	-6.99164	0.297086	79.1923	5.63507e-19	8.08018e-16
HORVU1Hr1G092300	-4.29007	2.09709	77.8071	1.13613e-18	1.49335e-15
HORVU5Hr1G070360	-3.47897	7.83268	76.6568	2.034e-18	2.46787e-15
HORVU7Hr1G036720	-3.35902	4.6457	75.838	3.07913e-18	3.46908e-15
HORVU3Hr1G086230	-4.57616	1.20388	75.4951	3.66321e-18	3.85199e-15
HORVU6Hr1G078260	-3.67824	2.22072	74.8341	5.1198e-18	5.04717e-15
HORVU2Hr1G036590	-3.73515	4.52825	74.4617	6.18249e-18	5.73626e-15
HORVU3Hr1G050590	-3.46727	3.35876	74.227	6.96303e-18	6.10155e-15
HORVU4Hr1G008700	-1.96435	7.18131	73.3937	1.06202e-17	8.81648e-15
HORVU6Hr1G019760	4.11447	2.37807	71.7129	2.48897e-17	1.96293e-14
HORVU2Hr1G126810	-2.14152	4.26105	69.7745	6.64877e-17	4.99386e-14
HORVU3Hr1G074360	9.64732	0.976651	69.5644	7.39612e-17	5.30268e-14
HORVU6Hr1G084070	6.9144	2.59403	68.44	1.30795e-16	8.96968e-14
HORVU7Hr1G043880	-4.9977	2.74202	67.2522	2.38903e-16	1.57009e-13
HORVU5Hr1G087880	-3.35482	3.29506	66.9309	2.81194e-16	1.77411e-13
HORVU1Hr1G057880	1.81765	5.37568	65.8922	4.76261e-16	2.88926e-13
HORVU3Hr1G086220	-2.8574	3.60941	63.8778	1.32381e-15	7.73353e-13
HORVU3Hr1G086240	-4.56182	0.90008	63.6269	1.50365e-15	8.47039e-13
HORVU1Hr1G024870	-1.78129	7.24277	63.3825	1.70223e-15	9.25837e-13
HORVU3Hr1G106720	1.98022	5.07919	63.1156	1.94927e-15	1.02486e-12
HORVU4Hr1G084810	-1.92417	5.5532	62.1443	3.1919e-15	1.59556e-12
HORVU3Hr1G093830	2.62019	4.50642	62.1166	3.23705e-15	1.59556e-12
HORVU3Hr1G018390	-1.49414	4.7838	61.5253	4.37091e-15	2.08916e-12
HORVU2Hr1G044650	-2.19962	3.54183	61.2913	4.92253e-15	2.28362e-12
HORVU1Hr1G092290	-3.76285	1.56354	61.0636	5.52617e-15	2.49041e-12
HORVU3Hr1G105300	-3.70485	4.71627	59.6347	1.14206e-14	5.00379e-12
HORVU5Hr1G119520	-4.70487	1.62645	58.4348	2.10142e-14	8.9583e-12
HORVU2Hr1G006830	-2.55893	6.29651	58.3053	2.24439e-14	9.09522e-12
HORVU3Hr1G080500	-3.53574	2.81191	58.3014	2.24886e-14	9.09522e-12
HORVU7Hr1G090410	10.7554	8.92552	58.2057	2.361e-14	9.29972e-12
HORVU1Hr1G070250	-3.21536	2.14014	58.1592	2.41735e-14	9.29972e-12
HORVU1Hr1G075830	-2.94984	7.13223	58.0319	2.57897e-14	9.68526e-12
HORVU1Hr1G083160	1.98289	5.11822	57.7539	2.97051e-14	1.08962e-11
HORVU2Hr1G044520	-4.18519	1.92222	57.0523	4.24365e-14	1.50783e-11
HORVU1Hr1G049280	-4.98781	1.63625	56.992	4.37579e-14	1.50783e-11
HORVU3Hr1G002820	-1.68823	6.57493	56.9824	4.3974e-14	1.50783e-11
HORVU7Hr1G007520	-4.07374	6.18842	56.8307	4.74983e-14	1.59402e-11
HORVU5Hr1G077700	-2.12325	3.98725	56.5132	5.58229e-14	1.83436e-11
HORVU3Hr1G067380	1.97539	4.82591	56.3492	6.06768e-14	1.95317e-11
HORVU3Hr1G013390	-2.14798	3.69959	55.912	7.57899e-14	2.39087e-11
HORVU2Hr1G044620	6.45457	3.59841	55.7988	8.02801e-14	2.48286e-11
HORVU7Hr1G092230	1.65106	4.50529	55.5303	9.2031e-14	2.79155e-11
HORVU6Hr1G011860	-4.62783	0.91727	55.2839	1.0432e-13	3.1046e-11
HORVU2Hr1G027480	-7.08114	2.94492	53.5345	2.54087e-13	7.4217e-11
HORVU7Hr1G043620	-1.80308	5.6094	52.897	3.51514e-13	1.00808e-10
HORVU7Hr1G118020	-2.33412	3.80917	51.3325	7.79742e-13	2.19623e-10
HORVU4Hr1G086300	-2.9155	3.76021	50.856	9.93967e-13	2.7505e-10
HORVU3Hr1G000120	-1.41432	5.31431	50.6573	1.09985e-12	2.99101e-10
HORVU4Hr1G090660	1.65391	3.60377	50.2348	1.36411e-12	3.64679e-10
HORVU2Hr1G110230	1.82752	6.16356	49.8368	1.6708e-12	4.39226e-10
HORVU7Hr1G028730	-1.80058	3.92584	49.2458	2.2582e-12	5.83911e-10
HORVU4Hr1G027050	4.12658	-0.0572168	48.8031	2.82999e-12	7.19959e-10
HORVU0Hr1G022290	-2.32508	3.66629	48.2429	3.76552e-12	9.42755e-10
HORVU6Hr1G084290	-2.51599	3.12796	47.4364	5.68187e-12	1.40031e-09
HORVU3Hr1G007740	-3.03241	1.10868	47.3051	6.07548e-12	1.47428e-09
HORVU7Hr1G010740	-4.98479	0.54873	46.9983	7.10477e-12	1.69793e-09
HORVU2Hr1G064160	-2.7002	3.10362	46.5513	8.92523e-12	2.10116e-09
HORVU5Hr1G063940	2.2651	8.26808	46.2894	1.02014e-11	2.36628e-09
HORVU2Hr1G014900	-2.58801	1.94858	46.2079	1.06348e-11	2.43106e-09
HORVU4Hr1G002390	-7.11768	1.80869	45.7999	1.30968e-11	2.91176e-09
HORVU0Hr1G039020	-3.16429	3.29258	45.7984	1.31069e-11	2.91176e-09
HORVU5Hr1G089850	-4.38991	-0.242778	45.4138	1.59509e-11	3.49435e-09
HORVU2Hr1G087030	-1.26934	5.4782	45.2807	1.70726e-11	3.66008e-09
HORVU5Hr1G064020	-1.49331	6.93735	45.2694	1.71715e-11	3.66008e-09
HORVU1Hr1G081490	1.50156	4.90486	45.1432	1.83137e-11	3.80239e-09
HORVU3Hr1G028020	-5.12047	0.528671	45.1424	1.83213e-11	3.80239e-09
HORVU7Hr1G036960	-2.80896	5.56203	45.0066	1.96372e-11	3.97361e-09
HORVU5Hr1G068060	-2.35895	3.90601	45.0053	1.96501e-11	3.97361e-09
HORVU5Hr1G019650	-2.02878	4.29167	44.8285	2.15064e-11	4.29393e-09
HORVU2Hr1G118010	-4.00138	0.383964	44.7741	2.21132e-11	4.35989e-09
HORVU0Hr1G005160	-2.31323	5.73609	44.6146	2.399e-11	4.67154e-09
HORVU7Hr1G044210	-2.1709	2.29433	44.3789	2.70593e-11	5.20495e-09
HORVU4Hr1G059150	-3.0381	4.18089	44.129	3.07437e-11	5.84241e-09
HORVU6Hr1G030350	-2.9793	1.00895	43.6583	3.91012e-11	7.34218e-09
HORVU7Hr1G074660	-1.86536	6.14822	43.322	4.64329e-11	8.6163e-09
HORVU6Hr1G012090	-6.88782	4.28978	43.284	4.73428e-11	8.683e-09
HORVU5Hr1G043010	-4.69647	0.348569	42.8858	5.80305e-11	1.05209e-08
HORVU5Hr1G109190	-3.03426	2.01011	42.6895	6.41547e-11	1.14049e-08
HORVU1Hr1G064780	-1.1891	6.29702	42.6835	6.43526e-11	1.14049e-08
HORVU3Hr1G001060	-3.55127	3.50735	42.3875	7.48673e-11	1.31209e-08
HORVU1Hr1G021150	-3.96842	1.33569	41.7221	1.05211e-10	1.82362e-08
HORVU3Hr1G007590	-1.87934	4.23101	41.5779	1.13264e-10	1.94187e-08
HORVU3Hr1G028060	-2.17072	3.1594	41.4098	1.23437e-10	2.09352e-08
HORVU3Hr1G109460	-3.46429	1.36618	41.1451	1.4134e-10	2.37166e-08
HORVU6Hr1G028790	-1.89513	4.13342	41.0822	1.45957e-10	2.42335e-08
HORVU4Hr1G017430	-1.59693	5.72722	40.932	1.57617e-10	2.58968e-08
HORVU7Hr1G032750	1.14265	7.20072	40.8558	1.63889e-10	2.66497e-08
HORVU2Hr1G000420	-4.89077	0.471092	40.6799	1.79322e-10	2.88617e-08
HORVU7Hr1G040460	1.77104	2.67862	40.296	2.18254e-10	3.4773e-08
HORVU2Hr1G024460	-3.57895	4.03592	40.1986	2.29412e-10	3.61852e-08
HORVU3Hr1G015780	-3.7856	1.62224	40.1289	2.37747e-10	3.71285e-08
HORVU2Hr1G081590	-4.91071	3.53073	40.0346	2.49507e-10	3.8583e-08
HORVU7Hr1G024670	-1.66839	6.29051	39.8052	2.80601e-10	4.29701e-08
HORVU3Hr1G105870	-3.02827	2.22614	39.719	2.93263e-10	4.44773e-08
HORVU5Hr1G000640	-4.37869	3.3513	39.6467	3.04321e-10	4.57148e-08
HORVU7Hr1G116510	-4.51329	-0.401675	39.3344	3.571e-10	5.31372e-08
HORVU6Hr1G009150	-3.19484	1.16173	39.2816	3.66875e-10	5.40815e-08
HORVU6Hr1G004320	-1.20333	4.62127	39.2337	3.76001e-10	5.49135e-08
HORVU7Hr1G110570	-3.98606	1.23112	39.0451	4.14126e-10	5.99267e-08
HORVU2Hr1G095880	3.72932	3.92116	38.802	4.69058e-10	6.72586e-08
HORVU5Hr1G047150	-2.27214	2.684	38.4279	5.68144e-10	8.07328e-08
HORVU7Hr1G088750	-1.94186	2.43772	38.1457	6.56551e-10	9.24623e-08
HORVU5Hr1G072770	-4.07647	0.14053	37.8576	7.61007e-10	1.06224e-07
HORVU4Hr1G088600	-3.45519	-0.190887	37.8151	7.77758e-10	1.0761e-07
HORVU2Hr1G098660	-1.31415	4.71184	37.7008	8.24728e-10	1.13117e-07
HORVU1Hr1G079150	-2.13915	3.68233	37.6293	8.55478e-10	1.16323e-07
HORVU3Hr1G093170	6.71835	-0.0207792	37.465	9.30667e-10	1.24954e-07
HORVU2Hr1G002840	-4.74513	4.40137	37.4564	9.34799e-10	1.24954e-07
HORVU4Hr1G057740	-5.17313	0.800067	37.2033	1.06435e-09	1.41076e-07
HORVU2Hr1G085270	-3.90113	1.20736	37.1218	1.10976e-09	1.45869e-07
HORVU5Hr1G011540	1.84973	4.73411	37.0601	1.14543e-09	1.49017e-07
HORVU6Hr1G084390	-1.60268	3.59537	37.0479	1.15261e-09	1.49017e-07
HORVU5Hr1G077140	1.9728	6.69968	36.7944	1.31268e-09	1.68333e-07
HORVU7Hr1G006840	5.64057	0.475478	36.6876	1.38662e-09	1.7638e-07
HORVU4Hr1G018150	3.82282	3.81612	36.5959	1.45336e-09	1.83391e-07
HORVU1Hr1G072890	-1.91874	8.0972	36.5225	1.50917e-09	1.88922e-07
HORVU2Hr1G099540	-4.95974	3.99679	36.4569	1.56078e-09	1.93844e-07
HORVU6Hr1G028150	-1.97281	3.05778	36.4355	1.57803e-09	1.94455e-07
HORVU4Hr1G075550	-3.64682	1.66106	36.3162	1.67767e-09	2.05131e-07
HORVU5Hr1G096370	-1.27602	5.50847	36.1584	1.81914e-09	2.20718e-07
HORVU7Hr1G018590	-2.44293	1.80545	36.1146	1.86045e-09	2.24007e-07
HORVU1Hr1G094250	-1.94918	2.98952	35.9846	1.98879e-09	2.37645e-07
HORVU3Hr1G070700	-3.09947	2.33624	35.7465	2.2474e-09	2.66529e-07
HORVU5Hr1G069750	-3.19909	1.57377	35.6218	2.39594e-09	2.82023e-07
HORVU5Hr1G012240	-2.17541	1.90813	35.5665	2.46495e-09	2.87997e-07
HORVU5Hr1G040740	1.178	6.98761	35.4947	2.55743e-09	2.96606e-07
HORVU5Hr1G066260	-3.05189	3.75576	35.4403	2.62992e-09	3.01075e-07
HORVU3Hr1G032400	1.59554	3.17053	35.4372	2.63414e-09	3.01075e-07
HORVU6Hr1G000070	2.81651	1.79962	35.1556	3.04388e-09	3.45404e-07
HORVU3Hr1G059170	2.1737	2.48487	35.128	3.08723e-09	3.47821e-07
HORVU7Hr1G117110	-5.01573	-0.72403	34.9521	3.3792e-09	3.78015e-07
HORVU3Hr1G011850	-8.96966	0.359044	34.7543	3.74056e-09	4.15491e-07
HORVU6Hr1G019380	3.75894	4.57456	34.5616	4.12982e-09	4.55522e-07
HORVU7Hr1G113560	-1.61496	3.65187	34.5375	4.18113e-09	4.57978e-07
HORVU1Hr1G089570	-3.54612	4.4907	34.3855	4.5209e-09	4.9178e-07
HORVU3Hr1G001020	-4.10917	2.75315	34.3581	4.58493e-09	4.92088e-07
HORVU5Hr1G110920	-1.35593	5.72311	34.3576	4.58613e-09	4.92088e-07
HORVU3Hr1G007290	-2.33777	3.09087	34.2336	4.88786e-09	5.20921e-07
HORVU6Hr1G059550	-1.54816	5.49557	34.1872	5.00582e-09	5.29912e-07
HORVU4Hr1G086320	-3.45745	2.07302	34.1074	5.21513e-09	5.48388e-07
HORVU3Hr1G077930	2.42393	4.03683	34.0293	5.4288e-09	5.67076e-07
HORVU0Hr1G000760	2.94724	0.198644	33.9863	5.55022e-09	5.75945e-07
HORVU1Hr1G049210	-3.46676	1.73322	33.9217	5.73762e-09	5.90526e-07
HORVU5Hr1G056130	-1.71214	3.72448	33.9122	5.76562e-09	5.90526e-07
HORVU4Hr1G065470	1.65072	3.58173	33.8967	5.81175e-09	5.91411e-07
HORVU7Hr1G028370	3.32345	5.40792	33.8526	5.94487e-09	6.01079e-07
HORVU3Hr1G070850	2.78412	5.03528	33.712	6.39039e-09	6.4201e-07
HORVU4Hr1G020000	-1.67355	3.09118	33.6356	6.64664e-09	6.63529e-07
HORVU7Hr1G050660	-3.55039	0.90438	33.6175	6.70877e-09	6.64217e-07
HORVU2Hr1G111760	-1.87793	3.09014	33.6091	6.73776e-09	6.64217e-07
HORVU4Hr1G072480	-3.52491	2.9141	33.5866	6.81593e-09	6.67749e-07
HORVU5Hr1G089840	-4.52604	-0.65637	33.5401	6.98082e-09	6.79682e-07
HORVU2Hr1G082660	-1.0538	5.8268	33.5022	7.11825e-09	6.88811e-07
HORVU1Hr1G071500	-3.32067	0.366274	33.4051	7.48271e-09	7.19663e-07
HORVU5Hr1G062410	-1.63185	6.59373	33.2631	8.04966e-09	7.69498e-07
HORVU2Hr1G118080	-2.94052	2.80799	33.1467	8.54627e-09	8.1205e-07
HORVU5Hr1G076250	-2.671	2.55032	33.0655	8.91076e-09	8.41614e-07
HORVU5Hr1G053950	2.06593	6.68278	33.0163	9.13885e-09	8.58019e-07
HORVU5Hr1G087240	-3.76216	0.179079	32.9907	9.26005e-09	8.64253e-07
HORVU5Hr1G002340	-3.9573	1.03631	32.7103	1.06971e-08	9.92498e-07
HORVU1Hr1G080320	1.22981	5.70367	32.6811	1.0859e-08	1.00163e-06
HORVU2Hr1G117360	-2.67662	2.22269	32.6539	1.10117e-08	1.00981e-06
HORVU3Hr1G019230	-1.98921	2.32303	32.5736	1.14765e-08	1.04635e-06
HORVU3Hr1G021810	-2.28791	4.36747	32.4549	1.21989e-08	1.10375e-06
HORVU0Hr1G007340	-4.75431	0.55132	32.4474	1.2246e-08	1.10375e-06
HORVU2Hr1G118100	-2.34312	2.71947	32.4181	1.24324e-08	1.11418e-06
HORVU5Hr1G072480	-1.59109	6.70641	32.4041	1.25219e-08	1.11587e-06
HORVU6Hr1G002390	-5.83526	-0.796056	32.3686	1.2753e-08	1.13007e-06
HORVU4Hr1G062330	-4.22241	1.42246	32.3254	1.30394e-08	1.149e-06
HORVU2Hr1G022800	-4.43351	-0.447412	32.2892	1.32847e-08	1.16048e-06
HORVU3Hr1G075150	-3.50411	0.141354	32.2845	1.33169e-08	1.16048e-06
HORVU6Hr1G017860	-2.03471	3.69843	32.2348	1.36624e-08	1.18405e-06
HORVU5Hr1G125400	-3.94496	-0.24473	32.2113	1.38285e-08	1.19189e-06
HORVU5Hr1G105840	2.17246	1.01609	32.1982	1.39217e-08	1.19341e-06
HORVU1Hr1G081300	-3.04275	1.60198	32.1423	1.43285e-08	1.21547e-06
HORVU2Hr1G059780	1.43909	4.19504	32.1416	1.43332e-08	1.21547e-06
HORVU1Hr1G007800	9.19263	2.41724	32.0896	1.47227e-08	1.24182e-06
HORVU5Hr1G028460	-2.43688	1.24778	32.0657	1.49044e-08	1.25047e-06
HORVU2Hr1G032360	-1.46706	3.99516	31.9883	1.55102e-08	1.2944e-06
HORVU5Hr1G084850	2.77352	-0.230696	31.7553	1.74872e-08	1.44564e-06
HORVU2Hr1G044640	-2.33363	2.12247	31.7532	1.75057e-08	1.44564e-06
HORVU2Hr1G071570	-3.62438	0.722754	31.4932	2.00138e-08	1.64416e-06
HORVU6Hr1G021780	-1.51137	5.12828	31.0474	2.51809e-08	2.05792e-06
HORVU3Hr1G108100	-2.09326	4.05833	30.9527	2.64399e-08	2.14968e-06
HORVU5Hr1G007770	1.06816	6.1346	30.9111	2.70125e-08	2.18496e-06
HORVU1Hr1G094880	-8.12445	-0.411107	30.7197	2.98125e-08	2.39915e-06
HORVU6Hr1G080420	-1.70589	5.0536	30.6238	3.13227e-08	2.50788e-06
HORVU3Hr1G096760	-2.30026	2.28339	30.5642	3.22994e-08	2.57303e-06
HORVU7Hr1G050680	-2.71216	1.24729	30.5285	3.2899e-08	2.60762e-06
HORVU5Hr1G099670	-0.98967	4.63237	30.5024	3.33449e-08	2.62974e-06
HORVU2Hr1G099640	-3.04913	1.72917	30.4149	3.48845e-08	2.73748e-06
HORVU7Hr1G031430	-1.94593	3.86184	30.3296	3.64512e-08	2.84626e-06
HORVU1Hr1G081950	-1.47799	5.43438	30.3044	3.69286e-08	2.86934e-06
HORVU2Hr1G112230	-1.01972	7.43715	30.2308	3.83567e-08	2.96569e-06
HORVU3Hr1G099530	-3.46684	2.28299	30.202	3.89315e-08	2.98629e-06
HORVU6Hr1G000090	1.38855	5.31102	30.1985	3.90018e-08	2.98629e-06
HORVU0Hr1G016310	-3.52516	0.51311	30.1435	4.0124e-08	3.05737e-06
HORVU7Hr1G093370	1.82321	5.77415	29.9558	4.42016e-08	3.35188e-06
HORVU3Hr1G023230	-2.31719	3.2007	29.9295	4.48052e-08	3.3814e-06
HORVU7Hr1G074640	-2.65192	5.14465	29.8871	4.57947e-08	3.4253e-06
HORVU6Hr1G022680	-3.42416	0.539791	29.886	4.58212e-08	3.4253e-06
HORVU7Hr1G037000	-1.64202	3.87571	29.8758	4.60629e-08	3.42712e-06
HORVU4Hr1G015890	-3.89228	1.71234	29.8455	4.67872e-08	3.46467e-06
HORVU2Hr1G089440	-2.17181	3.6935	29.7161	5.00177e-08	3.67025e-06
HORVU1Hr1G092650	-4.26021	2.73453	29.7157	5.00288e-08	3.67025e-06
HORVU1Hr1G093670	5.65026	1.99164	29.6924	5.06322e-08	3.69732e-06
HORVU3Hr1G104940	-4.42546	4.135	29.6484	5.17965e-08	3.75937e-06
HORVU7Hr1G113850	-5.12918	0.63632	29.6423	5.19585e-08	3.75937e-06
HORVU3Hr1G110580	-2.94826	2.22381	29.613	5.27498e-08	3.79919e-06
HORVU2Hr1G087090	1.5279	5.56034	29.5813	5.36205e-08	3.84435e-06
HORVU1Hr1G007810	1.53128	5.80516	29.4867	5.63015e-08	4.01829e-06
HORVU4Hr1G018440	-1.30793	3.65277	29.2032	6.51701e-08	4.63031e-06
HORVU2Hr1G064150	-2.88117	1.51402	29.184	6.58205e-08	4.65555e-06
HORVU5Hr1G028180	-0.901013	5.9898	29.1718	6.62367e-08	4.66407e-06
HORVU5Hr1G097270	-2.02508	2.32974	29.0735	6.96849e-08	4.88507e-06
HORVU2Hr1G110080	-3.46776	4.08176	28.9359	7.48152e-08	5.20871e-06
HORVU6Hr1G083180	1.50017	2.78905	28.9321	7.4962e-08	5.20871e-06
HORVU1Hr1G054100	-1.84482	2.90216	28.6906	8.4917e-08	5.87454e-06
HORVU3Hr1G106950	-1.13543	5.25744	28.5237	9.25607e-08	6.37537e-06
HORVU3Hr1G024650	-2.12473	1.37568	28.4409	9.66018e-08	6.62478e-06
HORVU4Hr1G072360	-4.6017	0.0668275	28.1637	1.11477e-07	7.61182e-06
HORVU2Hr1G101980	-1.79899	2.81239	27.7853	1.35551e-07	9.21573e-06
HORVU6Hr1G061390	1.8667	1.90186	27.7539	1.37767e-07	9.32617e-06
HORVU0Hr1G012940	-2.28708	3.09975	27.7355	1.3909e-07	9.37547e-06
HORVU3Hr1G086210	-1.01097	6.0795	27.7023	1.41491e-07	9.49678e-06
HORVU1Hr1G092310	-4.59818	-0.312527	27.6252	1.47246e-07	9.82219e-06
HORVU5Hr1G006330	-4.81355	0.153886	27.6208	1.47585e-07	9.82219e-06
HORVU2Hr1G085280	-4.06549	5.19015	27.5684	1.51637e-07	1.00495e-05
HORVU7Hr1G101740	-3.13803	1.01721	27.5111	1.56192e-07	1.0308e-05
HORVU6Hr1G013750	-1.59756	2.61444	27.4961	1.57408e-07	1.03272e-05
HORVU2Hr1G010560	-1.61012	4.74841	27.4823	1.58536e-07	1.03272e-05
HORVU6Hr1G046160	-2.80109	0.340825	27.4781	1.5888e-07	1.03272e-05
ENSRNA049485910	8.83695	3.32886	27.4755	1.59101e-07	1.03272e-05
HORVU1Hr1G089490	-3.50699	5.97598	27.3706	1.67966e-07	1.08193e-05
HORVU5Hr1G018750	-3.53953	-0.341432	27.3696	1.68054e-07	1.08193e-05
HORVU2Hr1G042240	1.95864	1.26796	27.3557	1.69267e-07	1.0853e-05
HORVU2Hr1G121060	-1.18035	7.83442	27.3478	1.69958e-07	1.08532e-05
HORVU5Hr1G120920	1.70268	4.01653	27.3217	1.72266e-07	1.09562e-05
HORVU2Hr1G019520	2.66765	1.10377	27.3012	1.74105e-07	1.10288e-05
HORVU4Hr1G004460	-1.2226	4.77874	27.2077	1.82727e-07	1.15183e-05
HORVU2Hr1G108520	-6.08225	2.5873	27.2017	1.83294e-07	1.15183e-05
HORVU2Hr1G091270	1.20598	5.3677	27.1067	1.92531e-07	1.20508e-05
HORVU4Hr1G063660	-3.60285	1.79803	27.096	1.93599e-07	1.20547e-05
HORVU1Hr1G015260	1.88816	2.12299	27.0908	1.94123e-07	1.20547e-05
HORVU3Hr1G013180	-2.58225	3.50639	27.0817	1.95035e-07	1.20639e-05
HORVU1Hr1G089550	-2.3396	4.08178	27.0384	1.99451e-07	1.22424e-05
HORVU5Hr1G061950	-1.83794	3.83544	27.0382	1.99474e-07	1.22424e-05
HORVU1Hr1G092250	-3.93094	1.6067	26.9863	2.04903e-07	1.25269e-05
HORVU3Hr1G023400	-2.13271	1.40789	26.8403	2.20984e-07	1.34578e-05
HORVU4Hr1G069300	2.38749	0.585829	26.8302	2.22138e-07	1.34761e-05
HORVU3Hr1G105790	-2.11983	4.84908	26.7982	2.2585e-07	1.36488e-05
HORVU4Hr1G018180	4.35093	-0.578959	26.7863	2.27246e-07	1.36807e-05
HORVU3Hr1G031020	-1.15959	4.94053	26.7768	2.28364e-07	1.36958e-05
HORVU6Hr1G011120	-1.32614	5.86594	26.5382	2.58372e-07	1.54367e-05
HORVU1Hr1G037760	0.996715	5.34362	26.4755	2.66902e-07	1.58862e-05
HORVU6Hr1G005360	-1.16177	3.69431	26.438	2.72138e-07	1.6137e-05
HORVU1Hr1G093660	5.55882	3.34658	26.4223	2.74355e-07	1.62075e-05
HORVU4Hr1G085050	1.39531	11.6488	26.3631	2.82889e-07	1.66493e-05
HORVU6Hr1G092010	-1.01536	4.52234	26.3141	2.90166e-07	1.70141e-05
HORVU3Hr1G034110	-2.97814	0.815081	26.252	2.99646e-07	1.74534e-05
HORVU6Hr1G012170	-3.12401	4.40655	26.2438	3.00917e-07	1.74534e-05
HORVU3Hr1G096830	-1.57906	5.91316	26.2434	3.00978e-07	1.74534e-05
HORVU3Hr1G116650	-1.35887	4.67067	26.1945	3.08698e-07	1.78355e-05
HORVU2Hr1G007570	-1.76265	3.57283	26.1761	3.11657e-07	1.79407e-05
HORVU3Hr1G059290	-1.17475	7.81353	26.166	3.13292e-07	1.79693e-05
HORVU4Hr1G053130	-2.70681	2.36775	26.1288	3.19389e-07	1.82526e-05
HORVU3Hr1G057950	-2.31723	0.761823	26.0954	3.24953e-07	1.85035e-05
HORVU3Hr1G083820	-3.17489	0.0279105	26.0841	3.26858e-07	1.85451e-05
HORVU2Hr1G125230	-3.11092	3.31603	26.0248	3.37057e-07	1.90552e-05
HORVU3Hr1G069730	-1.21052	5.6518	26.0016	3.41134e-07	1.92168e-05
HORVU4Hr1G051450	-1.99827	2.34815	25.9929	3.42676e-07	1.9235e-05
HORVU6Hr1G088880	-1.65861	1.57889	25.8765	3.63971e-07	2.03579e-05
HORVU4Hr1G067930	-1.42045	3.91671	25.8438	3.70192e-07	2.06327e-05
HORVU1Hr1G049260	-2.81682	0.0825491	25.8103	3.76667e-07	2.09196e-05
HORVU3Hr1G098360	-2.33884	1.43125	25.6284	4.13907e-07	2.29072e-05
HORVU5Hr1G110440	-3.81645	-0.47864	25.3129	4.8745e-07	2.68831e-05
HORVU6Hr1G091160	3.09981	0.764541	25.2959	4.91763e-07	2.70264e-05
HORVU2Hr1G074130	-1.37291	3.5021	25.2467	5.04463e-07	2.76281e-05
HORVU4Hr1G067450	-3.11092	3.78227	25.225	5.10171e-07	2.7844e-05
HORVU1Hr1G070190	-1.16865	6.17538	25.1613	5.27309e-07	2.86801e-05
HORVU5Hr1G065420	-2.67279	2.31137	25.0374	5.62286e-07	3.04775e-05
HORVU3Hr1G024590	-1.83982	4.9112	24.9942	5.75019e-07	3.10608e-05
HORVU7Hr1G086120	-2.13685	6.63113	24.9584	5.85796e-07	3.1535e-05
HORVU2Hr1G090280	-2.67433	0.679515	24.9241	5.96329e-07	3.19928e-05
HORVU4Hr1G065920	-1.3056	6.7147	24.894	6.05702e-07	3.23856e-05
HORVU6Hr1G090280	4.05161	2.11532	24.8764	6.1125e-07	3.25718e-05
HORVU6Hr1G004420	-2.38212	-0.0426928	24.8613	6.16072e-07	3.27182e-05
HORVU6Hr1G014880	-5.69853	-0.181065	24.8497	6.19781e-07	3.28047e-05
HORVU3Hr1G083680	-3.29787	0.963017	24.7843	6.41174e-07	3.38235e-05
HORVU2Hr1G030520	1.5719	4.05602	24.6955	6.71393e-07	3.52996e-05
HORVU2Hr1G078890	-1.21875	3.45759	24.6151	7.00027e-07	3.66828e-05
HORVU5Hr1G043460	-2.62344	1.23763	24.5079	7.40053e-07	3.86518e-05
HORVU2Hr1G068630	-1.19861	3.9734	24.4523	7.61711e-07	3.96517e-05
HORVU4Hr1G004000	-2.6085	1.22521	24.4231	7.73352e-07	4.01253e-05
HORVU2Hr1G124330	-5.90817	0.115065	24.4038	7.81156e-07	4.03973e-05
HORVU6Hr1G004310	-1.52156	2.22086	24.3896	7.86942e-07	4.05635e-05
HORVU4Hr1G055220	-3.3916	2.2038	24.3527	8.02128e-07	4.12116e-05
HORVU1Hr1G001770	-1.79967	3.52377	24.3425	8.06414e-07	4.12973e-05
HORVU7Hr1G030000	1.2709	3.67069	24.3202	8.15771e-07	4.16413e-05
HORVU5Hr1G082890	-0.855459	7.1885	24.2694	8.37601e-07	4.26177e-05
HORVU7Hr1G114880	-1.26867	3.49173	24.2024	8.6724e-07	4.39838e-05
HORVU2Hr1G074770	1.69511	7.60895	24.1694	8.82249e-07	4.46017e-05
HORVU3Hr1G006620	-2.88793	3.41192	24.0991	9.15018e-07	4.61105e-05
HORVU2Hr1G039640	3.05997	1.92432	24.0667	9.30559e-07	4.67443e-05
HORVU1Hr1G083100	1.23397	3.78357	24.0333	9.4685e-07	4.74117e-05
HORVU4Hr1G011600	-1.36087	4.85347	24.0013	9.62732e-07	4.80543e-05
HORVU3Hr1G089830	-1.21984	8.49545	23.949	9.8924e-07	4.92217e-05
HORVU3Hr1G056640	-3.82904	-0.544345	23.8463	1.0434e-06	5.17533e-05
HORVU2Hr1G070720	-1.10127	4.79821	23.8252	1.05491e-06	5.216e-05
HORVU1Hr1G049270	-2.83382	1.65431	23.7696	1.08585e-06	5.35221e-05
HORVU3Hr1G049640	-1.4784	4.19857	23.704	1.12347e-06	5.52039e-05
HORVU1Hr1G082670	-3.1675	1.44344	23.6931	1.12987e-06	5.53193e-05
HORVU5Hr1G114850	2.0496	5.17031	23.6881	1.13283e-06	5.53193e-05
HORVU7Hr1G038220	-1.82182	4.68027	23.5775	1.19983e-06	5.82253e-05
HORVU6Hr1G005420	-5.19729	0.329409	23.5732	1.20251e-06	5.82253e-05
HORVU6Hr1G002630	-1.29192	3.1604	23.5717	1.20341e-06	5.82253e-05
HORVU1Hr1G028030	-0.944892	6.21513	23.4995	1.24948e-06	6.02693e-05
HORVU4Hr1G084510	-1.32263	3.93095	23.4582	1.27657e-06	6.13883e-05
HORVU6Hr1G071190	-2.77532	3.95936	23.4167	1.30442e-06	6.2537e-05
HORVU1Hr1G004150	4.10604	1.78514	23.4058	1.31183e-06	6.27013e-05
HORVU1Hr1G089500	-3.18908	5.62446	23.3597	1.34364e-06	6.40279e-05
HORVU3Hr1G007980	0.900249	5.81744	23.2861	1.39609e-06	6.63267e-05
[truncated: 15,441 more rows]

## Sheet: Os.sen
geneID	logFC	logCPM	LR	PValue	FDR
[truncated: 18,449 more rows]

[truncated: 3 more sheets: Os.tol, Zm.sen, Zm.tol]
