# Supplementary material for: A Comparative Transcriptomic Meta-Analysis Revealed Conserved Key Genes and Regulatory Networks Involved in Drought Tolerance in Cereal Crops
Source: Int J Mol Sci. 2021 Dec 2;22(23):13062. doi: 10.3390/ijms222313062 (PMC8657901; doi:10.3390/ijms222313062)
Supplement: Supplementary file 1 [file ijms-22-13062-s001.zip › Supplementary_File_S2.xlsx]

## Sheet: B. dystachion
gene ID	logFC.sen	logFC.tol	Class	Rice ortholog
BRADI_1g00530v3	-0.75		sen-	Os03g0861700
BRADI_1g00540v3	2.64		sen+	Os03g0861400
BRADI_1g00600v3	7.04		sen+	Os07g0422100
BRADI_1g00620v3	-1.76		sen-	Os10g0447100
BRADI_1g00690v3	-1.12		sen-
BRADI_1g00700v3	-0.95	-0.68
BRADI_1g00740v3	-1.34		sen-
BRADI_1g00750v3	-1.46		sen-	Os08g0242800
BRADI_1g00780v3	-2.2		sen-	Os03g0858800
BRADI_1g00830v3	-1.73		sen-	Os03g0858700
BRADI_1g00840v3	-1.84		sen-	Os03g0858600
BRADI_1g00847v3	0.51		sen+	Os03g0858400
BRADI_1g00880v3	1.14		sen+	Os03g0858200
BRADI_1g00940v3	-1.67		sen-	Os03g0857400
BRADI_1g00950v3	-2.49		sen-	Os03g0856700
BRADI_1g00960v3	-0.94		sen-
BRADI_1g01021v3	-1.35		sen-	Os03g0856100
BRADI_1g01080v3	-0.78		sen-	Os03g0854000
BRADI_1g01100v3	0.81		sen+	Os03g0854200
BRADI_1g01140v3	1.21		sen+	Os03g0852900
BRADI_1g01190v3	4.91		sen+	Os03g0852800
BRADI_1g01227v3	0.55		sen+	Os03g0853800
BRADI_1g01250v3	1.2		sen+	Os11g0689100
BRADI_1g01270v3	1.79		sen+
BRADI_1g01310v3	2.13		sen+	Os03g0852400
BRADI_1g01320v3	1		sen+	Os03g0852500
BRADI_1g01330v3	-0.75		sen-	Os03g0852600
BRADI_1g01363v3	-1.03		sen-	Os03g0852700
BRADI_1g01380v3	0.75		sen+
BRADI_1g01432v3	-1.48		sen-
BRADI_1g01480v3	-0.71		sen-	Os03g0851700
BRADI_1g01500v3	0.88		sen+	Os03g0851500
BRADI_1g01580v3	1.5		sen+	Os03g0851100
BRADI_1g01600v3	0.95		sen+	Os03g0851000
BRADI_1g01610v3	1.97		sen+
BRADI_1g01630v3	1.36		sen+	Os03g0850700
BRADI_1g01660v3	0.84		sen+	Os03g0850600
BRADI_1g01750v3	1.94		sen+	Os03g0849800
BRADI_1g01760v3	1.71		sen+	Os03g0849900
BRADI_1g01790v3	-1.11		sen-	Os03g0850300
BRADI_1g01800v3	-1.89		sen-	Os03g0850400
BRADI_1g01847v3	0.88		sen+	Os03g0845500
BRADI_1g01880v3	-1.5		sen-	Os03g0844900
BRADI_1g01900v3	1.15		sen+	Os03g0844700
BRADI_1g01930v3	0.81		sen+	Os03g0844500
BRADI_1g01950v3	-1.19		sen-
BRADI_1g01965v3	-1.36		sen-
BRADI_1g01970v3	-1.02		sen-	Os03g0844000
BRADI_1g02030v3	-2.09	0.55	sen-/tol+	Os03g0843400
BRADI_1g02080v3	-1.14		sen-
BRADI_1g02090v3	0.85		sen+	Os03g0843300
BRADI_1g02130v3	0.96		sen+
BRADI_1g02150v3	-1.89		sen-	Os03g0841900
BRADI_1g02160v3	-0.86		sen-	Os03g0841800
BRADI_1g02270v3	-0.94		sen-	Os04g0278101
BRADI_1g02300v3	2.26		sen+	Os03g0839800
BRADI_1g02306v3	0.87		sen+
BRADI_1g02370v3	-1.81		sen-	Os03g0839200
BRADI_1g02380v3	0.64		sen+	Os03g0839100
BRADI_1g02400v3	-1.51		sen-	Os03g0838900
BRADI_1g02440v3	-0.75		sen-	Os03g0838100
BRADI_1g02450v3	-0.7		sen-
BRADI_1g02460v3	1.23		sen+	Os07g0208801
BRADI_1g02490v3	-0.53		sen-	Os03g0837300
BRADI_1g02550v3	-2.23	0.48	sen-/tol+	Os01g0938100
BRADI_1g02560v3	-1.68		sen-	Os03g0836300
BRADI_1g02621v3	1.62		sen+	Os06g0612200
BRADI_1g02630v3	2.17		sen+	Os03g0835400
BRADI_1g02680v3	-1.16		sen-	Os03g0835100
BRADI_1g02720v3	1.89		sen+	Os03g0833800
BRADI_1g02740v3	0.78		sen+	Os03g0833700
BRADI_1g02750v3	-1.33		sen-
BRADI_1g02990v3	0.81		sen+	Os03g0831500
BRADI_1g03020v3	0.9		sen+
BRADI_1g03030v3	1.21		sen+	Os03g0831100
BRADI_1g03120v3	0.99		sen+	Os03g0829100
BRADI_1g03191v3	-0.86		sen-	Os03g0827900
BRADI_1g03207v3	-1.58		sen-	Os03g0828300
BRADI_1g03220v3	-2.33		sen-	Os03g0828100
BRADI_1g03260v3	-2.75		sen-	Os03g0826500
BRADI_1g03283v3	-0.69		sen-
BRADI_1g03340v3	-1.88	1	sen-/tol+
BRADI_1g03380v3	0.64		sen+	Os03g0825700
BRADI_1g03400v3	-1.25		sen-	Os03g0825500
BRADI_1g03410v3	0.8		sen+	Os03g0825400
BRADI_1g03500v3	-2.17		sen-	Os01g0386600
BRADI_1g03510v3	1.04		sen+	Os03g0823400
BRADI_1g03530v3	-0.69		sen-
BRADI_1g03550v3	-1.08		sen-
BRADI_1g03600v3	1.76		sen+	Os03g0822300
BRADI_1g03605v3	-1.28		sen-
BRADI_1g03610v3	0.98		sen+	Os03g0822200
BRADI_1g03660v3	0.62		sen+	Os03g0821800
BRADI_1g03686v3	-2.15		sen-
BRADI_1g03710v3	-1.44		sen-	Os07g0236700
BRADI_1g03750v3	-0.76		sen-	Os03g0820600
BRADI_1g03760v3	4.73		sen+	Os03g0820500
BRADI_1g03910v3	-1.85		sen-	Os03g0818200
BRADI_1g03920v3	1.65		sen+	Os03g0818100
BRADI_1g03940v3		0.7	tol+	Os03g0817900
BRADI_1g03953v3	0.8		sen+
BRADI_1g04060v3	0.75		sen+
BRADI_1g04130v3	-2.47	0.62	sen-/tol+	Os03g0815400
BRADI_1g04150v3	1.08		sen+
BRADI_1g04160v3	0.83		sen+	Os07g0224000
BRADI_1g04226v3	0.62		sen+	Os01g0183100
BRADI_1g04300v3	-1.66	0.51	sen-/tol+	Os03g0811100
BRADI_1g04305v3	1.12		sen+
BRADI_1g04310v3	1.22		sen+
BRADI_1g04320v3	0.89		sen+	Os03g0810800
BRADI_1g04510v3	8.49		sen+	Os03g0809200
BRADI_1g04520v3	-0.52		sen-	Os03g0809300
BRADI_1g04660v3	1.15		sen+	Os03g0807800
BRADI_1g04700v3	-2.22		sen-	Os08g0560900
BRADI_1g04730v3	-0.92		sen-	Os03g0807000
BRADI_1g04780v3	1.14		sen+	Os03g0806600
BRADI_1g04810v3	-1.01		sen-	Os03g0805900
BRADI_1g04860v3	0.63		sen+	Os03g0805200
BRADI_1g04870v3	1.07		sen+	Os03g0805100
BRADI_1g04990v3	1.04		sen+	Os03g0803600
BRADI_1g05110v3	0.83		sen+	Os03g0824300
BRADI_1g05156v3	-1.06		sen-	Os03g0800500
BRADI_1g05198v3	-1.97		sen-
BRADI_1g05206v3	0.69		sen+
BRADI_1g05230v3	-1.18		sen-
BRADI_1g05330v3	-1.06		sen-	Os03g0799000
BRADI_1g05340v3	0.86		sen+	Os03g0798600
BRADI_1g05430v3	-0.82		sen-	Os03g0797600
BRADI_1g05450v3	-6.54		sen-	Os03g0797400
BRADI_1g05467v3	1.68		sen+	Os03g0797000
BRADI_1g05480v3	-1.85		sen-	Os03g0796900
BRADI_1g05490v3	0.7		sen+	Os03g0796800
BRADI_1g05510v3	0.89		sen+	Os03g0796501
BRADI_1g05530v3	6.38		sen+
BRADI_1g05540v3	3.6		sen+
BRADI_1g05560v3	1.07		sen+	Os03g0795800
BRADI_1g05610v3	-1.41		sen-	Os03g0795200
BRADI_1g05620v3	-1.76		sen-	Os03g0795100
BRADI_1g05630v3	0.7		sen+	Os03g0795000
BRADI_1g05670v3	0.72		sen+	Os03g0794700
BRADI_1g05680v3	-0.91		sen-	Os03g0794500
BRADI_1g05752v3	-1.71		sen-	Os01g0523401
BRADI_1g05799v3	-1.55		sen-	Os04g0473025
BRADI_1g05801v3	-1.17		sen-
BRADI_1g05804v3	-1.27		sen-	gene-rps15-2
BRADI_1g05810v3	-0.76		sen-	Os03g0157000
BRADI_1g05837v3	1.79		sen+	Os03g0793900
BRADI_1g05850v3	2.23		sen+	Os03g0793800
BRADI_1g05890v3		-1.64	tol-	Os05g0166600
BRADI_1g05910v3	10.97		sen+	Os03g0793700
BRADI_1g05920v3	-1.76		sen-	Os03g0793600
BRADI_1g05970v3	0.94		sen+	Os07g0170300
BRADI_1g06050v3	-0.8		sen-	Os03g0792800
BRADI_1g06080v3	-0.85		sen-	Os03g0792400
BRADI_1g06160v3	-2.12		sen-	Os07g0282500
BRADI_1g06190v3	-1.78		sen-
BRADI_1g06220v3	0.74		sen+	Os04g0501000
BRADI_1g06250v3	-1.07		sen-	Os03g0789200
BRADI_1g06280v3	-2.12		sen-
BRADI_1g06366v3	0.89		sen+	Os04g0515300
BRADI_1g06410v3	-4.72		sen-	Os03g0786500
BRADI_1g06420v3	-2.52		sen-	Os03g0786400
BRADI_1g06425v3	-1.6		sen-
BRADI_1g06430v3	-1.67		sen-	Os08g0198700
BRADI_1g06451v3	1.18		sen+
BRADI_1g06480v3	-0.6		sen-	Os03g0785300
BRADI_1g06490v3	-2.66		sen-	Os03g0785200
BRADI_1g06520v3	1.13		sen+
BRADI_1g06570v3	-0.71		sen-	Os03g0784600
BRADI_1g06620v3	-0.51		sen-	Os03g0784000
BRADI_1g06640v3	0.54		sen+	Os03g0783000
BRADI_1g06670v3	-2.15		sen-	Os03g0782500
BRADI_1g06678v3	-2.38		sen-
BRADI_1g06691v3	2.64		sen+
BRADI_1g06695v3	-5.15		sen-
BRADI_1g06700v3	-1		sen-	Os03g0781700
BRADI_1g06750v3	-1.75	0.62	sen-/tol+	Os03g0781400
BRADI_1g06755v3	0.84		sen+
BRADI_1g06772v3	-1.6	0.6	sen-/tol+
BRADI_1g06800v3	0.66		sen+	Os03g0780600
BRADI_1g06810v3	0.77		sen+	Os03g0780500
BRADI_1g06890v3	-2.2	0.92	sen-/tol+	Os03g0778100
BRADI_1g07010v3	-2.09	0.57	sen-/tol+
BRADI_1g07070v3	-1.42		sen-	Os03g0775600
BRADI_1g07080v3	-1.71		sen-	Os03g0775500
BRADI_1g07090v3	-0.8		sen-	Os03g0775400
BRADI_1g07120v3	-2.57		sen-	Os03g0775000
BRADI_1g07133v3	-2.4	0.72	sen-/tol+	Os03g0774400
BRADI_1g07140v3	-2.32		sen-	Os03g0774300
BRADI_1g07170v3	-1.37		sen-	Os03g0773800
BRADI_1g07190v3	1.5		sen+	Os03g0773600
BRADI_1g07200v3	0.92		sen+	Os03g0773300
BRADI_1g07237v3	-0.74		sen-	Os03g0772600
BRADI_1g07277v3	1.28		sen+	Os03g0770800
BRADI_1g07310v3	3.7		sen+	Os03g0770000
BRADI_1g07320v3	-0.98		sen-	Os03g0769900
BRADI_1g07330v3	-2.28		sen-	Os03g0769700
BRADI_1g07340v3	-1.32	0.55	sen-/tol+	Os03g0769600
BRADI_1g07360v3	-1.02		sen-	Os03g0769400
BRADI_1g07370v3	-1.84		sen-	Os03g0769100
BRADI_1g07380v3	-0.58		sen-	Os03g0769050
BRADI_1g07400v3	1.16		sen+	Os04g0650800
BRADI_1g07410v3	1.11		sen+	Os03g0620800
BRADI_1g07430v3	2.94		sen+	Os03g0767900
BRADI_1g07441v3	1.44		sen+	Os03g0767800
BRADI_1g07457v3	2.37		sen+	Os03g0767600
BRADI_1g07520v3	1.17		sen+	Os03g0766000
BRADI_1g07530v3	-3.42	0.87	sen-/tol+	Os03g0765900
BRADI_1g07560v3	-2.06		sen-	Os10g0403700
BRADI_1g07570v3	-0.74		sen-	Os03g0765200
BRADI_1g07577v3	-0.7		sen-	Os03g0765100
BRADI_1g07590v3	-1.12		sen-	Os03g0765000
BRADI_1g07650v3	1.15		sen+	Os03g0764300
BRADI_1g07780v3	1.25		sen+	Os03g0762400
BRADI_1g07790v3	-2.3		sen-	Os03g0762300
BRADI_1g07840v3	2.05		sen+	Os03g0761500
BRADI_1g07860v3	1.03		sen+	Os03g0761200
BRADI_1g07880v3	1.36		sen+	Os03g0761000
BRADI_1g07930v3	-1.59		sen-	Os03g0760000
BRADI_1g07980v3	-0.86		sen-	Os03g0758900
BRADI_1g08000v3	-0.54		sen-	Os03g0758600
BRADI_1g08040v3	-0.53		sen-
BRADI_1g08060v3	-1.06		sen-	Os03g0758300
BRADI_1g08070v3	-1.24		sen-	Os03g0758100
BRADI_1g08106v3	-1.8		sen-	Os03g0758000
BRADI_1g08120v3	1.51		sen+	Os12g0443500
BRADI_1g08157v3	-2.32		sen-
BRADI_1g08190v3	-2.51		sen-	Os03g0757200
BRADI_1g08270v3	-1.01		sen-
BRADI_1g08357v3	-3.44		sen-
BRADI_1g08410v3	2.27		sen+	Os03g0751600
BRADI_1g08421v3		-0.55	tol-	Os03g0751100
BRADI_1g08510v3	0.8		sen+
BRADI_1g08517v3	-1.31		sen-
BRADI_1g08550v3	-2.07		sen-	Os03g0749500
BRADI_1g08607v3	0.68		sen+	Os03g0748800
BRADI_1g08627v3	0.75		sen+	Os03g0748600
BRADI_1g08680v3	-2.82		sen-	Os03g0748300
BRADI_1g08710v3	-2.19		sen-	Os03g0747900
BRADI_1g08718v3	-1.32		sen-	Os03g0747700
BRADI_1g08810v3	0.79		sen+	Os03g0746800
BRADI_1g08830v3	-0.76		sen-	Os03g0746600
BRADI_1g08870v3	1.41		sen+	Os03g0745600
BRADI_1g08907v3	-0.69		sen-	Os03g0744700
BRADI_1g09000v3	-1.26		sen-
BRADI_1g09030v3	-0.81		sen-	Os03g0743900
BRADI_1g09042v3	1.44		sen+	Os03g0743500
BRADI_1g09080v3	1.08		sen+	Os09g0474400
BRADI_1g09090v3	0.93		sen+	Os03g0742900
BRADI_1g09170v3	0.89		sen+	Os03g0741400
BRADI_1g09177v3	1.52		sen+	Os03g0741100
BRADI_1g09240v3	2.69		sen+	Os03g0739700
BRADI_1g09246v3	-1.27		sen-	Os03g0738900
BRADI_1g09300v3	-1.9		sen-	Os03g0738400
BRADI_1g09357v3	-0.84		sen-	Os10g0421800
BRADI_1g09369v3	0.73		sen+	Os03g0737400
BRADI_1g09420v3	-1.7		sen-	Os03g0736700
BRADI_1g09431v3	-2.56		sen-	Os03g0736600
BRADI_1g09530v3	0.67		sen+	Os03g0735100
BRADI_1g09537v3	-1.31		sen-	Os03g0735000
BRADI_1g09615v3	-1.21		sen-
BRADI_1g09630v3	0.82		sen+	Os03g0733000
BRADI_1g09729v3	0.76		sen+
BRADI_1g09737v3	1.1		sen+
BRADI_1g09760v3	-1.52		sen-	Os03g0731100
BRADI_1g09790v3	-2.26		sen-	Os03g0731100
BRADI_1g09810v3	0.77		sen+	Os03g0730800
BRADI_1g09860v3	1.58		sen+	Os03g0729800
BRADI_1g09910v3	-0.63		sen-	Os03g0729300
BRADI_1g09930v3	2.04		sen+	Os03g0729200
BRADI_1g09940v3	-1.33		sen-	Os03g0729100
BRADI_1g09970v3	1.37		sen+	Os03g0728800
BRADI_1g10110v3		-0.42	tol-	Os03g0726500
BRADI_1g10170v3	-1.84		sen-	Os03g0725800
BRADI_1g10180v3	1.15		sen+	Os03g0725400
BRADI_1g10310v3	9.75		sen+	Os03g0723400
BRADI_1g10320v3	7.92		sen+	Os07g0108800
BRADI_1g10360v3	-0.85		sen-	Os09g0442700
BRADI_1g10410v3	1.19		sen+
BRADI_1g10480v3	-0.88		sen-	Os05g0421750
BRADI_1g10525v3	-2.22		sen-
BRADI_1g10530v3	-0.63		sen-	Os03g0719500
BRADI_1g10580v3	2.13		sen+	Os03g0718800
BRADI_1g10640v3	1.22		sen+	Os03g0717900
BRADI_1g10650v3	2.29		sen+	Os12g0443500
BRADI_1g10660v3	-1.73		sen-
BRADI_1g10689v3	-4.39		sen-
BRADI_1g10860v3	1.26		sen+	Os02g0589400
BRADI_1g10875v3	-0.66		sen-
BRADI_1g10917v3	4.7		sen+	Os03g0703000
BRADI_1g10930v3	1.05		sen+	Os03g0703000
BRADI_1g10950v3	0.55		sen+	Os03g0703200
BRADI_1g10980v3	0.7		sen+	Os03g0703900
BRADI_1g10990v3	-1.6		sen-	Os03g0704000
BRADI_1g11000v3	-1.41		sen-	Os03g0704100
BRADI_1g11027v3	1.12		sen+
BRADI_1g11050v3	-2.24		sen-	Os03g0705800
BRADI_1g11120v3	3.99		sen+	Os03g0708000
BRADI_1g11150v3	-0.63		sen-	Os03g0708400
BRADI_1g11160v3	-0.83		sen-	Os03g0708500
BRADI_1g11171v3	0.95		sen+
BRADI_1g11240v3	5.26		sen+	Os03g0709300
BRADI_1g11270v3	-0.85		sen-	Os03g0710600
BRADI_1g11300v3	0.52		sen+	Os03g0710900
BRADI_1g11310v3	-1.21		sen-	Os03g0711100
BRADI_1g11372v3	-1.04		sen-
BRADI_1g11440v3	0.68		sen+	Os03g0712700
BRADI_1g11450v3	6.06		sen+	Os03g0712800
BRADI_1g11490v3	-1.66		sen-	Os03g0713000
BRADI_1g11510v3	-2.97		sen-	Os03g0713200
BRADI_1g11550v3	-1.03		sen-	Os03g0701600
BRADI_1g11557v3	1.5		sen+
BRADI_1g11580v3	-1.06		sen-	Os03g0701500
BRADI_1g11610v3	-0.63		sen-	Os03g0701300
BRADI_1g11670v3	1.35		sen+	Os03g0700700
BRADI_1g11687v3	-1.05		sen-	Os03g0699600
BRADI_1g11700v3	-0.65		sen-	Os03g0699400
BRADI_1g11720v3	-1.29		sen-	Os03g0699300
BRADI_1g11730v3	0.7		sen+	Os03g0699200
BRADI_1g11760v3	0.63		sen+	Os03g0698800
BRADI_1g11837v3	-1.29		sen-	Os03g0695500
BRADI_1g11850v3	-2.94		sen-
BRADI_1g11920v3	4.36		sen+	Os03g0693800
BRADI_1g11930v3	3.64		sen+	Os03g0693800
BRADI_1g11980v3	-0.72		sen-	Os03g0693000
BRADI_1g12030v3	4.43		sen+	Os03g0692000
BRADI_1g12050v3	0.99		sen+	Os02g0523500
BRADI_1g12110v3	1.8		sen+	Os03g0689900
BRADI_1g12117v3	4.75		sen+	Os03g0689300
BRADI_1g12130v3	-4.08	1.91	sen-/tol+	Os01g0600900
BRADI_1g12140v3	-1.62		sen-	Os03g0689100
BRADI_1g12150v3	-2.19		sen-	Os03g0688300
BRADI_1g12196v3	1.55		sen+
BRADI_1g12200v3	-0.78		sen-	Os03g0686900
BRADI_1g12210v3	-0.64		sen-	Os03g0685900
BRADI_1g12240v3	-1.29		sen-	Os03g0685300
BRADI_1g12260v3	-1.72		sen-	Os03g0685000
BRADI_1g12280v3	-3.26		sen-	Os03g0684700
BRADI_1g12290v3	3.52		sen+	Os03g0684500
BRADI_1g12300v3	-0.79		sen-	Os03g0684400
BRADI_1g12330v3	-0.71		sen-	Os03g0684000
BRADI_1g12460v3	0.73		sen+	Os03g0681900
BRADI_1g12580v3	2.75		sen+	Os03g0676400
BRADI_1g12615v3	-2.14		sen-	Os03g0675500
BRADI_1g12660v3	1.02		sen+	Os03g0674300
BRADI_1g12670v3	-0.87		sen-	Os03g0673800
BRADI_1g12715v3	-0.7		sen-
BRADI_1g12780v3	-5.2		sen-
BRADI_1g12837v3	0.94		sen+	Os03g0668900
BRADI_1g12850v3	-1.07		sen-
BRADI_1g12880v3	-1.08		sen-	Os03g0666700
BRADI_1g13040v3	6.05		sen+	Os03g0663800
BRADI_1g13047v3	1.52		sen+	Os03g0663700
BRADI_1g13190v3	0.92		sen+	Os03g0659300
BRADI_1g13200v3	-2.65		sen-	Os03g0659200
BRADI_1g13207v3	-0.74		sen-	Os03g0657400
BRADI_1g13223v3	-0.62		sen-
BRADI_1g13226v3	-0.8		sen-	Os03g0656900
BRADI_1g13232v3	1.44		sen+	Os03g0656800
BRADI_1g13240v3	-0.85		sen-	Os03g0656500
BRADI_1g13290v3	0.83		sen+
BRADI_1g13310v3	0.53		sen+	Os03g0655600
BRADI_1g13322v3	3.73		sen+
BRADI_1g13340v3	1.01		sen+	Os03g0655300
BRADI_1g13420v3	-0.67	0.97	sen-/tol+	Os03g0654600
BRADI_1g13440v3	-1.26		sen-	Os03g0654400
BRADI_1g13480v3	0.88		sen+	Os03g0651100
BRADI_1g13580v3	-0.5		sen-	Os03g0649000
BRADI_1g13590v3	-1.38		sen-	Os03g0648900
BRADI_1g13630v3	0.93		sen+
BRADI_1g13660v3	1.37		sen+	Os03g0648100
BRADI_1g13670v3	0.68		sen+	Os03g0647800
BRADI_1g13680v3	0.72		sen+	Os03g0647600
BRADI_1g13690v3	0.72		sen+	Os03g0647500
BRADI_1g13750v3	1		sen+	Os03g0646200
BRADI_1g13760v3	6.08		sen+
BRADI_1g13800v3	8.61		sen+	Os03g0644600
BRADI_1g13823v3	-1.07		sen-
BRADI_1g13827v3	0.93		sen+	Os03g0643300
BRADI_1g13900v3	-1.61		sen-	Os12g0613100
BRADI_1g13910v3	0.66		sen+	Os03g0640800
BRADI_1g13980v3	-1.95		sen-
BRADI_1g14010v3	-0.62		sen-	Os03g0638800
BRADI_1g14020v3	2.28		sen+	Os06g0351500
BRADI_1g14040v3	0.91		sen+	Os03g0638200
BRADI_1g14093v3	1.25		sen+
BRADI_1g14160v3	-2.57		sen-	Os03g0635000
BRADI_1g14170v3	-1.32		sen-	Os11g0671000
BRADI_1g14200v3	-2.34		sen-	Os03g0634400
BRADI_1g14210v3	-0.74		sen-	Os03g0634000
BRADI_1g14220v3	0.99		sen+	Os03g0633900
BRADI_1g14240v3	-2.5		sen-	Os03g0633500
BRADI_1g14350v3	2.41		sen+	Os03g0626700
BRADI_1g14360v3	-0.66		sen-
BRADI_1g14370v3	-2.31		sen-
BRADI_1g14410v3	1.02		sen+	Os02g0514700
BRADI_1g14422v3	1.42		sen+
BRADI_1g14425v3	-1		sen-	Os03g0626000
BRADI_1g14467v3	-2.05		sen-	Os03g0624600
BRADI_1g14590v3	-0.76		sen-	Os03g0617900
BRADI_1g14650v3	3.71		sen+	Os03g0563100
BRADI_1g14710v3	-1.74	0.92	sen-/tol+	Os03g0611200
BRADI_1g14740v3	1.31		sen+	Os03g0610650
BRADI_1g14745v3	-0.54		sen-
BRADI_1g14750v3	-1.47		sen-	Os03g0610400
BRADI_1g14760v3	-1.96		sen-	Os10g0358700
BRADI_1g14780v3	-1.94		sen-	Os03g0609500
BRADI_1g14810v3	-3.12		sen-	Os03g0607700
BRADI_1g14830v3	-0.6		sen-
BRADI_1g14835v3	-0.9		sen-
BRADI_1g14845v3	8.27		sen+	Os03g0607200
BRADI_1g14900v3	-2.53		sen-	Os03g0760000
BRADI_1g14976v3	1.35		sen+
BRADI_1g14983v3	-1.37		sen-	Os03g0603600
BRADI_1g15030v3	1.89		sen+	Os03g0602300
BRADI_1g15035v3	6.91		sen+
BRADI_1g15050v3	1.02		sen+	Os03g0599800
BRADI_1g15120v3	-1.21		sen-	Os03g0598100
BRADI_1g15170v3	-1.85		sen-	Os03g0595300
BRADI_1g15270v3	-0.89		sen-	Os03g0593200
BRADI_1g15280v3	-0.78		sen-	Os03g0593100
BRADI_1g15290v3	-2.8		sen-	Os03g0592500
BRADI_1g15350v3	-0.62		sen-	Os03g0587000
BRADI_1g15377v3	-0.75		sen-	Os03g0586700
BRADI_1g15450v3	-2.11		sen-	Os03g0583800
BRADI_1g15500v3	-1.59		sen-	Os03g0582100
BRADI_1g15507v3	-1.14		sen-	Os03g0582000
BRADI_1g15627v3	-1.23		sen-	Os02g0106600
BRADI_1g15670v3	-2.13		sen-	Os03g0572900
BRADI_1g15711v3	-0.8		sen-	Os03g0569800
BRADI_1g15800v3	1.45		sen+	Os03g0429800
BRADI_1g15810v3	0.89		sen+	Os02g0723600
BRADI_1g15880v3	-0.93		sen-	Os03g0437600
BRADI_1g15970v3	0.48		sen+	Os05g0220100
BRADI_1g16075v3	-0.64		sen-
BRADI_1g16151v3	-1.11		sen-	Os01g0682200
BRADI_1g16170v3	-0.61		sen-	Os03g0427100
BRADI_1g16240v3	0.68		sen+	Os03g0423000
BRADI_1g16480v3	1.18		sen+	Os07g0695300
BRADI_1g16490v3	0.82		sen+	Os07g0695100
BRADI_1g16500v3	-0.7		sen-	Os07g0694800
BRADI_1g16527v3	0.63		sen+	Os07g0694500
BRADI_1g16560v3	1.1		sen+	Os07g0694000
BRADI_1g16580v3	-2.94		sen-	Os07g0693800
BRADI_1g16620v3	1.76		sen+	Os07g0693500
BRADI_1g16630v3	4.4		sen+	Os03g0292100
BRADI_1g16670v3	-1		sen-	Os07g0693000
BRADI_1g16680v3	0.7		sen+	Os07g0692900
BRADI_1g16710v3	-2.41		sen-
BRADI_1g16730v3	-1.07		sen-	Os07g0692401
BRADI_1g16740v3	-1.32		sen-	Os07g0692200
BRADI_1g16760v3	-1.72		sen-
BRADI_1g16770v3	0.79		sen+	Os07g0691200
BRADI_1g17040v3	-3.8		sen-	Os07g0689800
BRADI_1g17050v3	-2.21		sen-	Os12g0433700
BRADI_1g17080v3	-0.75		sen-	Os07g0688800
BRADI_1g17090v3	-1.83		sen-	Os07g0689600
BRADI_1g17200v3	-2.76		sen-	Os07g0687900
BRADI_1g17210v3	-0.54		sen-	Os07g0687700
BRADI_1g17250v3	-2.12		sen-	Os07g0687000
BRADI_1g17280v3	1.15		sen+
BRADI_1g17300v3	0.89		sen+	Os07g0686400
BRADI_1g17380v3	-2.32		sen-	Os07g0685500
BRADI_1g17410v3	-0.98		sen-	Os07g0685000
BRADI_1g17440v3	1.69		sen+	Os07g0684800
BRADI_1g17460v3	-1.78		sen-	Os07g0683900
BRADI_1g17480v3	2.69	-1.52	sen+/tol-
BRADI_1g17490v3	1.32		sen+	Os07g0682800
BRADI_1g17510v3	-1.47		sen-	Os07g0682400
BRADI_1g17570v3	0.61		sen+	Os07g0681700
BRADI_1g17740v3	-4.31		sen-	Os07g0679200
BRADI_1g17762v3	-2.2		sen-
BRADI_1g17780v3	2.05		sen+	Os06g0306600
BRADI_1g17810v3	-0.98		sen-	Os07g0678300
BRADI_1g17840v3	-3.48	-0.63	ΔLFC>1	Os07g0677500
BRADI_1g17850v3	-3.31		sen-	Os07g0677500
BRADI_1g17870v3	-2.69		sen-	Os07g0677100
BRADI_1g17970v3	0.95		sen+	Os07g0674700
BRADI_1g18010v3	0.76		sen+	Os07g0674200
BRADI_1g18020v3	1.47		sen+
BRADI_1g18030v3	0.74		sen+	Os07g0673900
BRADI_1g18035v3	-1		sen-
BRADI_1g18040v3	-1.36		sen-	Os07g0673700
BRADI_1g18050v3	-2.25		sen-	Os07g0673550
BRADI_1g18170v3	0.65		sen+	Os07g0671800
BRADI_1g18240v3	-3.18		sen-
BRADI_1g18320v3	-1.41		sen-	Os01g0895100
BRADI_1g18340v3	1.1		sen+	Os07g0665200
BRADI_1g18347v3	-1.26		sen-	Os07g0666600
BRADI_1g18407v3	-1.47		sen-	Os07g0667300
BRADI_1g18440v3	1.75		sen+
BRADI_1g18470v3	1.78		sen+	Os07g0668300
BRADI_1g18500v3	1.42		sen+	Os07g0668900
BRADI_1g18560v3	-1.71		sen-
BRADI_1g18595v3	-0.65		sen-	Os07g0669600
BRADI_1g18650v3	-1.47	0.97	sen-/tol+	Os07g0662900
BRADI_1g18660v3	-1.19	0.56	sen-/tol+
BRADI_1g18702v3	-0.67		sen-
BRADI_1g18730v3	1.37		sen+	Os07g0661800
BRADI_1g18750v3	0.72		sen+	Os03g0685600
BRADI_1g18760v3	0.63		sen+	Os07g0661600
BRADI_1g18780v3	1.84		sen+	Os07g0661400
BRADI_1g18822v3	-1.05		sen-	Os07g0660466
BRADI_1g18840v3	0.85		sen+
BRADI_1g18900v3	-0.97		sen-
BRADI_1g18930v3	1.19		sen+	Os07g0660000
BRADI_1g18960v3	-2.14		sen-
BRADI_1g18980v3	-0.52		sen-	Os07g0659700
BRADI_1g19050v3	1.2		sen+	Os07g0658700
BRADI_1g19080v3	-1.6	0.58	sen-/tol+	Os07g0658400
BRADI_1g19110v3	1		sen+	Os07g0658200
BRADI_1g19120v3	-0.64		sen-	Os07g0658100
BRADI_1g19130v3	-1.54		sen-
BRADI_1g19140v3	-1.22		sen-	Os07g0657900
BRADI_1g19220v3	-2.57	0.58	sen-/tol+	Os07g0656500
BRADI_1g19240v3	-1.12		sen-
BRADI_1g19250v3	-1.36		sen-	Os07g0656700
BRADI_1g19380v3	0.98		sen+	Os07g0655400
BRADI_1g19500v3	1.24		sen+	Os07g0647900
BRADI_1g19550v3	1.56		sen+
BRADI_1g19710v3	1.03		sen+	Os07g0644000
BRADI_1g19713v3	9.19		sen+
BRADI_1g19716v3	2.66		sen+
BRADI_1g19730v3	-3.89		sen-	Os06g0306600
BRADI_1g19740v3	-1.21		sen-	Os06g0597800
BRADI_1g19750v3	-1.59		sen-	Os07g0643400
BRADI_1g19785v3	-2.54		sen-
BRADI_1g19790v3	-1.82	0.48	sen-/tol+	Os11g0482400
BRADI_1g19810v3	-1.47		sen-	Os06g0315900
BRADI_1g19860v3	1.39		sen+	Os07g0641700
BRADI_1g19940v3	1.27		sen+	Os07g0640000
BRADI_1g19970v3	-0.55		sen-	Os09g0396300
BRADI_1g20040v3	7.21		sen+	Os07g0638300
BRADI_1g20050v3	1.57		sen+	Os07g0638100
BRADI_1g20106v3	0.61		sen+	Os08g0149333
BRADI_1g20190v3	7.7		sen+
BRADI_1g20220v3	-0.84		sen-	Os07g0635900
BRADI_1g20260v3	-1.52		sen-	Os07g0635300
BRADI_1g20270v3	0.88		sen+	Os07g0634600
BRADI_1g20280v3	4.12		sen+	Os07g0634400
BRADI_1g20290v3	-0.83		sen-	Os07g0634300
BRADI_1g20313v3	0.92		sen+
BRADI_1g20340v3	1.08		sen+	Os07g0633500
BRADI_1g20390v3	-1.18		sen-	Os07g0632800
BRADI_1g20440v3	-1.37	0.97	sen-/tol+	Os07g0631900
BRADI_1g20500v3	2.11		sen+	Os07g0630900
BRADI_1g20510v3	-0.74		sen-	Os07g0477500
BRADI_1g20520v3	3.11		sen+	Os07g0630400
BRADI_1g20586v3	-1.11		sen-
BRADI_1g20596v3	4.31		sen+
BRADI_1g20600v3	1.53		sen+
BRADI_1g20620v3	0.97		sen+	Os07g0627800
BRADI_1g20640v3	0.88		sen+	Os02g0778400
BRADI_1g20670v3	5.97		sen+	Os02g0286350
BRADI_1g20710v3	0.85		sen+	Os07g0626100
BRADI_1g20730v3	-0.99		sen-	Os07g0626400
BRADI_1g20780v3	-3.95	0.86	sen-/tol+	Os07g0626800
BRADI_1g20790v3	-2.77		sen-	Os07g0627000
BRADI_1g20830v3	-0.56		sen-
BRADI_1g20860v3	-0.71		sen-	Os07g0616200
BRADI_1g20950v3	2.95		sen+	Os07g0617500
BRADI_1g20995v3	0.64		sen+	Os07g0617800
BRADI_1g21010v3	3.51		sen+	Os10g0370700
BRADI_1g21018v3	-1.62		sen-
BRADI_1g21040v3	3.09		sen+	Os07g0618400
BRADI_1g21050v3	1.66		sen+	Os07g0618500
BRADI_1g21070v3	0.54		sen+	Os07g0618800
BRADI_1g21260v3	1.03		sen+	Os07g0621300
BRADI_1g21280v3	0.92		sen+	Os07g0621500
BRADI_1g21308v3	2.25		sen+	Os07g0621800
BRADI_1g21320v3	1.22		sen+	Os07g0622100
BRADI_1g21337v3	1.04		sen+	Os07g0626500
BRADI_1g21350v3	0.81		sen+	Os07g0622700
BRADI_1g21360v3	0.79		sen+	Os07g0622900
BRADI_1g21380v3	-0.55		sen-	Os07g0623200
BRADI_1g21416v3	-3.75		sen-
BRADI_1g21440v3	1.03		sen+	Os03g0299900
BRADI_1g21490v3	0.97		sen+	Os07g0615200
BRADI_1g21550v3	1.06		sen+	Os07g0614500
BRADI_1g21580v3	2.11	-0.78	sen+/tol-	Os07g0614000
BRADI_1g21590v3	1.1		sen+	Os07g0613800
BRADI_1g21600v3	-1.48		sen-
BRADI_1g21730v3	1.33		sen+	Os07g0608500
BRADI_1g21762v3	0.94		sen+	Os07g0608200
BRADI_1g21780v3	-2.09		sen-
BRADI_1g21850v3	1.27		sen+	Os09g0485900
BRADI_1g21870v3	4.77		sen+	Os12g0114500
BRADI_1g21900v3	-2.25		sen-
BRADI_1g21950v3	-2.68		sen-
BRADI_1g21990v3	1.95		sen+	Os07g0604800
BRADI_1g22030v3	3.31		sen+	Os07g0604400
BRADI_1g22050v3	-2.29		sen-	Os07g0604000
BRADI_1g22087v3	0.65		sen+	Os07g0603800
BRADI_1g22140v3	4.54		sen+	Os07g0603300
BRADI_1g22170v3	0.87		sen+	Os01g0870201
BRADI_1g22180v3	1.35		sen+	Os07g0602900
BRADI_1g22187v3	7.36		sen+	Os07g0602800
BRADI_1g22210v3	0.64		sen+	Os07g0602600
BRADI_1g22250v3	0.65		sen+
BRADI_1g22260v3	1.61		sen+
BRADI_1g22270v3	-1.87		sen-
BRADI_1g22290v3	1.13		sen+	Os07g0600700
BRADI_1g22300v3	1.47		sen+	Os07g0600400
BRADI_1g22321v3	1.88		sen+
BRADI_1g22450v3	1.57		sen+	Os07g0599600
BRADI_1g22540v3	-2.96		sen-
BRADI_1g22671v3	-0.75		sen-	Os07g0597000
BRADI_1g22680v3	-0.96		sen-	Os07g0596900
BRADI_1g22700v3	0.95		sen+	Os03g0210100
BRADI_1g22750v3	-3.19		sen-
BRADI_1g22770v3	-0.73		sen-	Os07g0595700
BRADI_1g22870v3	1.45		sen+	Os07g0591100
BRADI_1g22930v3	-3.71		sen-	Os07g0588800
BRADI_1g23060v3	-2.29		sen-	Os07g0586900
BRADI_1g23070v3	-1.76		sen-	Os11g0708400
BRADI_1g23080v3	-2.9		sen-	Os07g0586800
BRADI_1g23110v3	1.23		sen+	Os07g0510400
BRADI_1g23130v3	1.17		sen+	Os07g0586100
BRADI_1g23150v3	-0.91		sen-	Os07g0585900
BRADI_1g23192v3	0.89		sen+
BRADI_1g23280v3	-0.55		sen-	Os07g0584500
BRADI_1g23287v3	-1.55		sen-	Os07g0584200
BRADI_1g23350v3	-1.23		sen-	Os07g0583600
BRADI_1g23390v3	-3.51		sen-	Os01g0532300
BRADI_1g23440v3	4.08		sen+
BRADI_1g23470v3	-0.83		sen-	Os07g0581366
BRADI_1g23480v3	0.81		sen+	Os07g0581300
BRADI_1g23490v3	0.79		sen+	Os06g0186900
BRADI_1g23610v3	-2.57		sen-	Os07g0577600
BRADI_1g23640v3	0.74		sen+	Os07g0577300
BRADI_1g23675v3	-0.76		sen-	Os07g0575800
BRADI_1g23691v3	-0.87		sen-	Os07g0262700
BRADI_1g23700v3	-1.06		sen-	Os07g0575600
BRADI_1g23722v3		-0.79	tol-	Os07g0575600
BRADI_1g23780v3	0.93		sen+	Os07g0616600
BRADI_1g23824v3	0.96		sen+
BRADI_1g23920v3	-2.77		sen-	Os07g0573400
BRADI_1g23960v3	0.97		sen+	Os07g0572900
BRADI_1g23990v3	1.22		sen+	Os07g0572400
BRADI_1g24000v3	1.56		sen+	Os07g0572300
BRADI_1g24060v3	-0.54		sen-	Os07g0571700
BRADI_1g24080v3	1.92		sen+	Os07g0571600
BRADI_1g24110v3	-1.54		sen-	Os07g0570700
BRADI_1g24126v3	-2.05		sen-
BRADI_1g24135v3	-1.25		sen-	Os07g0569800
BRADI_1g24147v3	-1.54		sen-	Os07g0569600
BRADI_1g24170v3	-1.35		sen-	Os07g0569500
BRADI_1g24220v3	-2.06		sen-	Os07g0568900
BRADI_1g24240v3	-0.57		sen-	Os07g0568600
BRADI_1g24250v3	-1.47		sen-	Os07g0568500
BRADI_1g24297v3	0.77		sen+	Os07g0568000
BRADI_1g24320v3	-1.42	0.59	sen-/tol+
BRADI_1g24330v3	0.68		sen+	Os07g0567300
BRADI_1g24340v3	1.96		sen+	Os05g0211100
BRADI_1g24410v3	2.66		sen+	Os07g0565800
BRADI_1g24471v3	0.93		sen+	Os02g0492500
BRADI_1g24500v3	-2.04	0.64	sen-/tol+	Os07g0565600
BRADI_1g24522v3	-1.58		sen-
BRADI_1g24560v3	-1.69		sen-	Os02g0742900
BRADI_1g24567v3	-1.13		sen-	Os07g0565400
BRADI_1g24590v3	-0.69		sen-	Os07g0564800
BRADI_1g24640v3	2.47		sen+	Os07g0564200
BRADI_1g24710v3	2.8		sen+	Os07g0563400
BRADI_1g24747v3	-1.01		sen-	Os07g0562800
BRADI_1g24753v3	-1.47		sen-
BRADI_1g24760v3	-3.41		sen-	Os07g0562700
BRADI_1g24770v3	-3.64		sen-	Os07g0561800
BRADI_1g24800v3	3		sen+	Os07g0560700
BRADI_1g24820v3	-2.18		sen-	Os07g0559700
BRADI_1g24860v3	-1.16		sen-	Os07g0558500
BRADI_1g24870v3	-2.69	0.43	sen-/tol+	Os07g0558400
BRADI_1g24900v3	-1.3		sen-	Os07g0558200
BRADI_1g24920v3	0.76		sen+	Os07g0558000
BRADI_1g24960v3	-0.83		sen-	Os07g0557100
BRADI_1g24980v3	-1.7	0.4	sen-/tol+	Os07g0556200
BRADI_1g25070v3	0.91		sen+	Os07g0553800
BRADI_1g25200v3	-0.89		sen-	Os07g0549800
BRADI_1g25230v3	0.98		sen+	Os07g0549600
BRADI_1g25240v3	1.31		sen+	Os07g0549200
BRADI_1g25270v3	-1.53		sen-
BRADI_1g25302v3	0.77		sen+	Os11g0433900
BRADI_1g25320v3	-2.55		sen-	Os07g0546400
BRADI_1g25330v3	-2.8		sen-
BRADI_1g25350v3	-1.1		sen-	Os07g0546000
BRADI_1g25400v3	-2.01		sen-	Os07g0545300
BRADI_1g25420v3	1.15		sen+	Os07g0544900
BRADI_1g25430v3	-3.28		sen-	Os07g0544800
BRADI_1g25460v3	-2.24		sen-	Os06g0706400
BRADI_1g25470v3	-0.77		sen-	Os07g0543000
BRADI_1g25517v3	-5.85		sen-	Os07g0539300
BRADI_1g25530v3	-6.09		sen-	Os07g0539300
BRADI_1g25552v3	-0.81		sen-
BRADI_1g25564v3	1.09		sen+
BRADI_1g25588v3	4.73		sen+	Os07g0537400
BRADI_1g25600v3	2.59		sen+	Os07g0537400
BRADI_1g25657v3	-1.1		sen-	Os07g0537000
BRADI_1g25670v3	-1.84		sen-
BRADI_1g25693v3	-1.83		sen-	Os07g0537200
BRADI_1g25697v3	-0.75		sen-	Os07g0535800
BRADI_1g25712v3	-0.71		sen-
BRADI_1g25727v3	-0.72		sen-	Os07g0534500
BRADI_1g25810v3	-0.7		sen-	Os07g0530700
BRADI_1g25860v3	-2.01		sen-	Os07g0529600
BRADI_1g25937v3	-1.6		sen-	Os07g0524900
BRADI_1g25977v3	0.58		sen+	Os07g0524100
BRADI_1g26010v3	0.74		sen+	Os07g0523700
BRADI_1g26060v3	0.61		sen+	Os07g0520900
BRADI_1g26070v3	-1.5	0.62	sen-/tol+	Os07g0520800
BRADI_1g26080v3	-0.71		sen-	Os07g0520600
BRADI_1g26100v3	1.34		sen+	Os03g0584400
BRADI_1g26120v3	0.75		sen+	Os07g0518100
BRADI_1g26180v3	-0.54		sen-	Os07g0517300
BRADI_1g26190v3	-2.19		sen-	Os07g0517100
BRADI_1g26197v3	1		sen+	Os07g0517000
BRADI_1g26210v3	0.84		sen+	Os07g0516900
BRADI_1g26220v3	4.87		sen+	Os07g0516700
BRADI_1g26240v3	3.56		sen+	Os07g0516600
BRADI_1g26260v3	2.66		sen+	Os07g0516300
BRADI_1g26287v3	-2.11		sen-	Os07g0516000
BRADI_1g26317v3	0.96		sen+
BRADI_1g26350v3	-2.13		sen-	Os07g0513000
BRADI_1g26440v3	-0.72		sen-	Os07g0511500
BRADI_1g26520v3	-1.54		sen-	Os07g0510100
BRADI_1g26530v3	-2.88		sen-	Os07g0509800
BRADI_1g26540v3	-1.11		sen-	Os07g0509700
BRADI_1g26570v3	-0.58		sen-
BRADI_1g26647v3	-0.91		sen-
BRADI_1g26690v3	-0.91		sen-	Os07g0507000
BRADI_1g26700v3	1.36		sen+	Os07g0506700
BRADI_1g26710v3	-1.17		sen-	Os07g0506600
BRADI_1g26720v3	-1.3		sen-	Os07g0505200
BRADI_1g26820v3	-0.57		sen-	Os07g0501900
BRADI_1g26840v3	-1.56		sen-	Os07g0501700
BRADI_1g26850v3	1.1		sen+	Os07g0500300
BRADI_1g26857v3	1.96		sen+
BRADI_1g26880v3	-2.21		sen-	Os01g0102300
BRADI_1g26980v3	-0.71		sen-
BRADI_1g27110v3	-2.34		sen-	Os07g0492100
BRADI_1g27130v3	-0.96		sen-	Os07g0491900
BRADI_1g27140v3	-1		sen-	Os05g0294600
BRADI_1g27191v3	-0.94		sen-	Os07g0490400
BRADI_1g27230v3	0.88		sen+	Os07g0490800
BRADI_1g27250v3	1.27		sen+	Os12g0403800
BRADI_1g27280v3	-2.32		sen-	Os07g0489800
BRADI_1g27436v3	-2.38		sen-
BRADI_1g27442v3	-1.79		sen-	Os07g0485500
BRADI_1g27450v3	-1.07		sen-	Os07g0485400
BRADI_1g27481v3	-2.63		sen-
BRADI_1g27920v3	3.67		sen+	Os10g0109300
BRADI_1g27990v3	0.58		sen+
BRADI_1g27995v3	-1.17		sen-
BRADI_1g28000v3	1.18		sen+	Os07g0479300
BRADI_1g28041v3	-0.84		sen-
BRADI_1g28050v3	-1.14		sen-
BRADI_1g28130v3	-1.75		sen-	Os07g0475400
BRADI_1g28140v3	-1.73		sen-	Os07g0475000
BRADI_1g28190v3	0.54		sen+	Os07g0472400
BRADI_1g28196v3	-0.96		sen-
BRADI_1g28273v3	2.16		sen+
BRADI_1g28310v3	-1.25		sen-	Os07g0470700
BRADI_1g28320v3	-2.04		sen-	Os08g0124600
BRADI_1g28326v3	-1.55		sen-	Os07g0469200
BRADI_1g28330v3	-3.22	0.53	sen-/tol+	Os09g0250300
BRADI_1g28366v3	1.37		sen+	Os10g0339290
BRADI_1g28410v3		2.59	tol+	Os07g0467200
BRADI_1g28416v3	-1.16		sen-	Os07g0464600
BRADI_1g28486v3	1.1		sen+
BRADI_1g28490v3	2.33		sen+	Os07g0462200
BRADI_1g28530v3	-1.59		sen-	Os07g0459400
BRADI_1g28540v3	1.78		sen+	Os07g0459200
BRADI_1g28580v3	-1.59		sen-	Os07g0457550
BRADI_1g28620v3	2		sen+	Os07g0115500
BRADI_1g28627v3	1.23		sen+	Os07g0456700
BRADI_1g28660v3	0.9		sen+	Os07g0455100
BRADI_1g28760v3	1.17		sen+	Os07g0448800
BRADI_1g28860v3	-2.07		sen-	Os11g0469900
BRADI_1g28870v3	-1.25		sen-	Os07g0548300
BRADI_1g28960v3	-1.28		sen-	Os07g0437500
BRADI_1g29000v3	-2.85		sen-
BRADI_1g29025v3	-1.56		sen-
BRADI_1g29066v3	-0.69		sen-
BRADI_1g29070v3	3.26		sen+	Os07g0442900
BRADI_1g29090v3	-0.84		sen-	Os07g0421866
BRADI_1g29110v3	1		sen+	Os02g0824300
BRADI_1g29140v3	1.9		sen+
BRADI_1g29220v3	-0.86		sen-	Os12g0276100
BRADI_1g29240v3	0.97		sen+	Os06g0731400
BRADI_1g29260v3	-2.83		sen-	Os11g0661300
BRADI_1g29267v3	1.16		sen+	Os08g0246300
BRADI_1g29300v3	0.71		sen+	Os06g0731800
BRADI_1g29321v3	1.01		sen+	Os06g0731900
BRADI_1g29340v3	-0.63		sen-
BRADI_1g29424v3	-1.31		sen-
BRADI_1g29427v3	1.18		sen+	Os03g0709200
BRADI_1g29441v3	1.04		sen+	Os11g0633500
BRADI_1g29446v3	1.38		sen+	Os03g0709200
BRADI_1g29457v3	-1.17		sen-	Os06g0730300
BRADI_1g29485v3	-0.75		sen-
BRADI_1g29500v3	-2.21	0.52	sen-/tol+	Os06g0729650
BRADI_1g29590v3	-2.72		sen-	Os06g0729000
BRADI_1g29611v3	-1.39		sen-
BRADI_1g29680v3	-1.25		sen-
BRADI_1g29880v3		1.61	tol+	Os06g0726200
BRADI_1g30020v3	2.47	1.37	ΔLFC<-1	Os06g0725000
BRADI_1g30110v3	-0.63		sen-	Os06g0716000
BRADI_1g30113v3	-2.88		sen-
BRADI_1g30140v3	-0.97		sen-	Os06g0716800
BRADI_1g30160v3	-2.01		sen-	Os06g0717200
BRADI_1g30180v3	-1.12		sen-	Os06g0717400
BRADI_1g30200v3	-0.77		sen-	Os06g0717800
BRADI_1g30220v3	1.06		sen+	Os06g0715700
BRADI_1g30273v3	-0.89		sen-	Os06g0638200
BRADI_1g30317v3	-1.68		sen-	Os10g0184200
BRADI_1g30360v3	-0.9		sen-	Os06g0639500
BRADI_1g30370v3	0.75		sen+	Os06g0639600
BRADI_1g30468v3	-1.87		sen-
BRADI_1g30550v3	-0.89		sen-	Os06g0644200
BRADI_1g30560v3	-0.56		sen-	Os06g0644500
BRADI_1g30580v3	0.92		sen+	Os06g0644600
BRADI_1g30600v3	0.66		sen+	Os06g0644800
BRADI_1g30640v3	-2.08		sen-	Os06g0645600
BRADI_1g30656v3	-0.89		sen-	Os06g0646000
BRADI_1g30690v3	-2.1		sen-
BRADI_1g30710v3	-3.13		sen-	Os06g0646100
BRADI_1g30730v3	-1.53		sen-
BRADI_1g30740v3	-1.02		sen-
BRADI_1g30750v3	1.14		sen+
BRADI_1g30811v3	-1.48		sen-	Os06g0647100
BRADI_1g30830v3	1.31		sen+	Os06g0647400
BRADI_1g30835v3	1.41		sen+
BRADI_1g30850v3	-1.31		sen-	Os06g0648500
BRADI_1g30882v3	-1.44		sen-
BRADI_1g30940v3	0.59		sen+	Os06g0650100
BRADI_1g30960v3	2.37		sen+	Os06g0650600
BRADI_1g30970v3	-0.94		sen-	Os06g0650800
BRADI_1g31100v3	3.47		sen+	Os06g0651200
BRADI_1g31130v3	-2.51		sen-	Os10g0205500
BRADI_1g31140v3	1.48		sen+	Os06g0653000
BRADI_1g31161v3	5.02		sen+	Os06g0653200
BRADI_1g31210v3	2.13		sen+	Os06g0654400
BRADI_1g31240v3	1.45		sen+	Os06g0656300
BRADI_1g31270v3	-0.75		sen-	Os06g0655100
BRADI_1g31280v3	-2.49		sen-
BRADI_1g31357v3	-1.75		sen-	Os06g0658500
BRADI_1g31370v3	-1.32		sen-	Os05g0275000
BRADI_1g31380v3	0.73		sen+	Os06g0658900
BRADI_1g31460v3	0.93		sen+	Os05g0490100
BRADI_1g31570v3	-2.5		sen-	Os06g0660700
BRADI_1g31600v3	-0.99		sen-	Os06g0660800
BRADI_1g31630v3	-0.89		sen-	Os06g0661500
BRADI_1g31650v3	-0.77		sen-	Os06g0661700
BRADI_1g31690v3	0.93		sen+	Os06g0662000
BRADI_1g31695v3	-1.53		sen-
BRADI_1g31700v3	-1.64		sen-	Os06g0662200
BRADI_1g31710v3	1.05		sen+	Os01g0375000
BRADI_1g31760v3	1.03		sen+	Os05g0365500
BRADI_1g31767v3	-0.94		sen-	Os06g0663600
BRADI_1g31780v3	-1.66		sen-	Os06g0663800
BRADI_1g31800v3	0.7		sen+	Os06g0663900
BRADI_1g31810v3	-1.17		sen-	Os06g0664200
BRADI_1g31816v3	-0.86		sen-
BRADI_1g31890v3	-1		sen-	Os06g0665500
BRADI_1g31910v3	4.52		sen+
BRADI_1g31950v3	0.91		sen+	Os05g0139300
BRADI_1g31971v3	-3.37		sen-
BRADI_1g31980v3	-0.79		sen-	Os05g0139300
BRADI_1g31998v3	4.17		sen+	Os10g0135100
BRADI_1g32010v3	1.17		sen+	Os05g0176000
BRADI_1g32060v3	-2.38		sen-	Os06g0666400
BRADI_1g32087v3	-0.59		sen-	Os06g0666600
BRADI_1g32100v3	-1.03		sen-	Os01g0888500
BRADI_1g32160v3	-2.82		sen-
BRADI_1g32170v3	0.61		sen+	Os03g0685600
BRADI_1g32180v3	2		sen+	Os07g0661800
BRADI_1g32340v3	0.87		sen+	Os06g0669800
BRADI_1g32370v3	-1.28		sen-	Os06g0670300
BRADI_1g32380v3	-0.69		sen-	Os06g0671000
BRADI_1g32445v3	4.08		sen+	Os06g0672400
BRADI_1g32590v3	1.09		sen+	Os06g0677400
BRADI_1g32650v3	-1.2		sen-	Os06g0675700
BRADI_1g32800v3	-0.83		sen-	Os06g0680500
BRADI_1g32830v3	0.99		sen+
BRADI_1g32840v3	3.41		sen+	Os06g0681200
BRADI_1g32850v3	1.07		sen+	Os06g0681300
BRADI_1g32920v3	1.14		sen+	Os02g0301100
BRADI_1g32933v3	1.51		sen+
BRADI_1g32939v3	-2.71		sen-
BRADI_1g32990v3	1.23		sen+	Os06g0682900
BRADI_1g33001v3	2.22		sen+
BRADI_1g33012v3	-3.39		sen-
BRADI_1g33030v3	-2.33		sen-	Os06g0683200
BRADI_1g33040v3	2.92		sen+	Os06g0683300
BRADI_1g33110v3	0.66		sen+
BRADI_1g33130v3	0.5		sen+	Os05g0349500
BRADI_1g33150v3	2.26		sen+	Os06g0685300
BRADI_1g33200v3	2.12		sen+	Os06g0686400
BRADI_1g33217v3	-1.52		sen-
BRADI_1g33230v3	-1.23		sen-	Os06g0686600
BRADI_1g33300v3	1.21		sen+	Os06g0687600
BRADI_1g33303v3	0.68		sen+
BRADI_1g33310v3	1.41		sen+	Os06g0687800
BRADI_1g33340v3	-1.05		sen-	Os09g0245500
BRADI_1g33347v3	-0.74		sen-	Os06g0690700
BRADI_1g33380v3	-0.83		sen-	Os06g0693700
BRADI_1g33390v3	0.82		sen+	Os06g0693500
BRADI_1g33420v3	-0.9		sen-
BRADI_1g33520v3	-1.27		sen-	Os06g0691600
BRADI_1g33610v3	-0.67		sen-	Os06g0694000
BRADI_1g33650v3	-2.71		sen-
BRADI_1g33670v3	-2.46		sen-	Os06g0694200
BRADI_1g33690v3	-2.18		sen-	Os06g0694400
BRADI_1g33700v3	-0.98		sen-	Os06g0694500
BRADI_1g33740v3	-0.66		sen-	Os06g0695500
BRADI_1g33810v3	1.96		sen+	Os06g0696400
BRADI_1g33827v3	1.91		sen+	Os06g0696600
BRADI_1g33860v3	1.89		sen+	Os06g0697600
BRADI_1g33900v3	2.57		sen+	Os06g0698300
BRADI_1g33950v3	-2.16		sen-	Os06g0698748
BRADI_1g34060v3	0.9		sen+	Os06g0699600
BRADI_1g34087v3	1.68		sen+	Os06g0700000
BRADI_1g34140v3	0.71		sen+	Os06g0700700
BRADI_1g34340v3		-0.51	tol-	Os06g0702600
BRADI_1g34370v3	1.34		sen+	Os10g0134700
BRADI_1g34380v3	3.71		sen+	Os10g0134700
BRADI_1g34407v3	-0.87		sen-	Os10g0134500
BRADI_1g34447v3	2.03		sen+	Os10g0134500
BRADI_1g34470v3	-2.16		sen-	Os06g0703900
BRADI_1g34500v3	-2.46		sen-	Os06g0704200
BRADI_1g34511v3	3.81		sen+	Os06g0704500
BRADI_1g34525v3	-1.54		sen-	Os06g0704700
BRADI_1g34560v3	-2.56	0.5	sen-/tol+	Os06g0705100
BRADI_1g34610v3	-2.5		sen-	Os06g0706400
BRADI_1g34640v3	6.91		sen+
BRADI_1g34647v3	2.92		sen+	Os06g0707000
BRADI_1g34660v3	0.96		sen+
BRADI_1g34750v3	0.54		sen+	Os06g0708500
BRADI_1g34760v3	-0.62		sen-	Os06g0708600
BRADI_1g34770v3	-1.07		sen-	Os06g0708700
BRADI_1g34807v3	1.06		sen+	Os06g0709000
BRADI_1g34825v3	3.24		sen+	Os06g0710001
BRADI_1g34830v3	3.06		sen+	Os06g0710300
BRADI_1g34850v3	1.66		sen+	Os06g0710700
BRADI_1g34910v3	-2.25		sen-	Os06g0711700
BRADI_1g35030v3	1.8		sen+	Os06g0713000
BRADI_1g35050v3	2.54		sen+	Os06g0713800
BRADI_1g35120v3	-1.21		sen-	Os06g0714600
BRADI_1g35130v3	-1.42		sen-	Os06g0714700
BRADI_1g35140v3	-1.25		sen-	Os06g0714800
BRADI_1g35220v3	-1.8		sen-	Os06g0715300
BRADI_1g35240v3	1.06		sen+	Os06g0715500
BRADI_1g35350v3	-1.13		sen-	Os06g0636600
BRADI_1g35386v3	-1.21	0.66	sen-/tol+
BRADI_1g35460v3	0.8		sen+	Os06g0635200
BRADI_1g35490v3	0.84		sen+	Os06g0634300
BRADI_1g35520v3	-1.33		sen-
BRADI_1g35612v3	1.17		sen+
BRADI_1g35660v3	1.8		sen+	Os06g0625500
BRADI_1g35697v3	0.85		sen+	Os06g0624900
BRADI_1g35730v3	-1.58		sen-	Os06g0623600
BRADI_1g35770v3	1.16		sen+	Os06g0622800
BRADI_1g35780v3	1.46		sen+	Os06g0354700
BRADI_1g35990v3	2.75		sen+
BRADI_1g36038v3	0.85		sen+
BRADI_1g36130v3	-2.97		sen-	Os10g0330400
BRADI_1g36160v3	-1.78		sen-	Os06g0610800
BRADI_1g36167v3	-0.88		sen-
BRADI_1g36250v3	-1.02		sen-	Os06g0608800
BRADI_1g36260v3	-2.07		sen-	Os06g0608700
BRADI_1g36420v3	-2.04		sen-
BRADI_1g36430v3	-2.23		sen-	Os06g0607100
BRADI_1g36490v3	-1.66		sen-	Os04g0496700
BRADI_1g36560v3	-1.26		sen-	Os06g0604600
BRADI_1g36580v3	1.7		sen+	Os06g0604200
BRADI_1g36660v3	1.72		sen+	Os06g0602800
BRADI_1g36720v3	-2.57		sen-	Os06g0602500
BRADI_1g36776v3	-0.64		sen-	Os06g0600800
BRADI_1g36820v3	-1.31		sen-	Os06g0600301
BRADI_1g36890v3	0.87		sen+	Os06g0597600
BRADI_1g36907v3	-1.64		sen-	Os06g0597400
BRADI_1g36920v3	0.69		sen+	Os06g0597200
BRADI_1g37010v3	-2.19		sen-	Os06g0594400
BRADI_1g37030v3	-1.92		sen-	Os06g0593800
BRADI_1g37090v3	-1.47		sen-
BRADI_1g37100v3	-0.94		sen-	Os06g0591600
BRADI_1g37112v3	-3.73		sen-
BRADI_1g37205v3	1.03		sen+
BRADI_1g37360v3	0.76		sen+	Os06g0574500
BRADI_1g37410v3	11.67		sen+
BRADI_1g37480v3	-0.61		sen-
BRADI_1g37490v3	0.72		sen+	Os06g0571400
BRADI_1g37590v3	0.62		sen+	Os06g0568000
BRADI_1g37620v3	1.48		sen+	Os06g0567200
BRADI_1g37626v3		-0.87	tol-	Os05g0537300
BRADI_1g37632v3	0.52		sen+	Os06g0567000
BRADI_1g37667v3	-0.53		sen-
BRADI_1g37700v3	-0.63		sen-	Os06g0565900
BRADI_1g37736v3	1.59		sen+	Os06g0565000
BRADI_1g37786v3	0.84		sen+
BRADI_1g37790v3	0.53		sen+	Os06g0562600
BRADI_1g37830v3	3.32		sen+	Os12g0483450
BRADI_1g37834v3	2.86		sen+
BRADI_1g37870v3	2.02		sen+	Os06g0561000
BRADI_1g37930v3	-2.99		sen-	Os06g0559400
BRADI_1g37963v3	-0.51		sen-
BRADI_1g37967v3	1.02		sen+	Os12g0595000
BRADI_1g37990v3	1.65		sen+	Os06g0556000
BRADI_1g38010v3	0.91		sen+
BRADI_1g38050v3	1.47		sen+	Os06g0554600
BRADI_1g38090v3	-2.84		sen-	Os06g0554200
BRADI_1g38140v3	2.05		sen+
BRADI_1g38150v3	-2.58		sen-	Os06g0552900
BRADI_1g38170v3	-1.06		sen-	Os06g0552400
BRADI_1g38190v3	1.23		sen+	Os06g0551400
BRADI_1g38227v3	1.7		sen+	Os07g0203300
BRADI_1g38250v3	-3.97		sen-
BRADI_1g38280v3	-1.59		sen-	Os06g0548000
BRADI_1g38630v3	-1.33		sen-	Os05g0186000
BRADI_1g38640v3	-2.47		sen-	Os06g0525200
BRADI_1g38660v3	1.17		sen+	Os06g0526600
BRADI_1g38680v3	-0.67		sen-	Os06g0527100
BRADI_1g38687v3	-0.78		sen-	Os06g0528600
BRADI_1g38837v3	1.2		sen+
BRADI_1g39030v3	-1.31		sen-	Os06g0535400
BRADI_1g39090v3	0.48		sen+	Os06g0538000
BRADI_1g39160v3	1.61		sen+	Os06g0542200
BRADI_1g39167v3	-1.42		sen-
BRADI_1g39206v3	-1.29		sen-	Os01g0791033
BRADI_1g39282v3	-0.88		sen-	Os06g0506000
BRADI_1g39290v3	2.57		sen+
BRADI_1g39318v3	2.02		sen+
BRADI_1g39332v3	1.61		sen+
BRADI_1g39520v3	-0.67		sen-	Os06g0102600
BRADI_1g40150v3	0.66		sen+	Os06g0503400
BRADI_1g40262v3	7.88		sen+
BRADI_1g41010v3	0.72		sen+	Os06g0546400
BRADI_1g41115v3	-3.98		sen-
BRADI_1g41150v3		-4.98	tol-
BRADI_1g41640v3	-0.65		sen-	Os06g0342750
BRADI_1g41797v3	0.94		sen+
BRADI_1g41820v3	-2.2		sen-	Os03g0565200
BRADI_1g41830v3	-0.7		sen-	Os06g0472000
BRADI_1g41907v3	-1.05		sen-	Os06g0498400
BRADI_1g41930v3	1.05		sen+	Os11g0298400
BRADI_1g41957v3	-1.3		sen-	Os06g0476200
BRADI_1g41990v3	1.02		sen+	Os03g0565500
BRADI_1g41993v3	-4.59		sen-
BRADI_1g42000v3	3.04		sen+	Os06g0483200
BRADI_1g42270v3	1.65		sen+	Os06g0486800
BRADI_1g42310v3	0.97		sen+	Os06g0488600
BRADI_1g42377v3	-0.97		sen-	Os06g0494100
BRADI_1g42390v3	1.08		sen+	Os06g0495100
BRADI_1g42397v3	-1.69		sen-	Os10g0326900
BRADI_1g42458v3	-1.56		sen-
BRADI_1g42478v3	-2.08		sen-	Os06g0497500
BRADI_1g42510v3	6.31		sen+	Os06g0498800
BRADI_1g42513v3	-2.78		sen-
BRADI_1g42516v3	-3.54		sen-
BRADI_1g42540v3	-1.62		sen-	Os06g0500300
BRADI_1g42620v3	0.82		sen+	Os06g0325500
BRADI_1g42630v3	-1.28		sen-	Os06g0326400
BRADI_1g42640v3	1.56		sen+
BRADI_1g42670v3	-2.89	0.5	sen-/tol+	Os06g0320500
BRADI_1g42707v3	1.15		sen+	Os06g0318600
BRADI_1g42750v3	-1.47		sen-
BRADI_1g42760v3	-2.98		sen-	Os06g0311800
BRADI_1g42800v3	0.69		sen+	Os06g0308300
BRADI_1g42810v3	0.71		sen+	Os06g0308100
BRADI_1g42820v3	-0.97	0.9	sen-/tol+	Os06g0308000
BRADI_1g42890v3	1.99		sen+	Os03g0283100
BRADI_1g42940v3	1.71		sen+	Os06g0304500
BRADI_1g42990v3	1		sen+	Os06g0301100
BRADI_1g43120v3	1.12		sen+	Os06g0300600
BRADI_1g43140v3	0.67		sen+	Os06g0300300
BRADI_1g43230v3	-0.91		sen-	Os06g0297800
BRADI_1g43260v3	-1.47		sen-	Os06g0297400
BRADI_1g43310v3	-2.36		sen-	Os06g0292400
BRADI_1g43347v3	8.64		sen+
BRADI_1g43350v3	0.61		sen+	Os06g0291600
BRADI_1g43410v3	2.01		sen+	Os06g0288300
BRADI_1g43423v3	-1.41		sen-
BRADI_1g43540v3	0.84		sen+	Os06g0284800
BRADI_1g43570v3	1.88		sen+	Os06g0283400
BRADI_1g43630v3	-0.72		sen-	Os06g0275800
BRADI_1g43637v3	1.02		sen+	Os06g0275700
BRADI_1g43680v3	2.3		sen+	Os06g0274800
BRADI_1g43690v3	-0.95		sen-
BRADI_1g43700v3	0.74		sen+
BRADI_1g43705v3	-0.93		sen-
BRADI_1g43710v3	-1.7		sen-	Os06g0348800
BRADI_1g43740v3	6.28		sen+	Os06g0272700
BRADI_1g43750v3	-2.17		sen-	Os06g0271600
BRADI_1g43760v3	2.37		sen+	Os06g0271000
BRADI_1g43770v3	0.69		sen+	Os06g0270900
BRADI_1g43900v3	-4.14		sen-	Os01g0882200
BRADI_1g43940v3	-0.84		sen-	Os06g0264900
BRADI_1g43950v3	-2.57	0.55	sen-/tol+	Os06g0264800
BRADI_1g43970v3	0.81		sen+	Os06g0264500
BRADI_1g43990v3	-4.36		sen-	Os06g0264200
BRADI_1g44000v3	-2.28		sen-
BRADI_1g44005v3	-2.65		sen-
BRADI_1g44010v3	-1.11		sen-
BRADI_1g44020v3	0.93		sen+	Os06g0262800
BRADI_1g44030v3	-2.92		sen-	Os06g0260500
BRADI_1g44040v3	-0.85		sen-	Os06g0260000
BRADI_1g44190v3	-1.93		sen-	Os06g0255100
BRADI_1g44297v3	-1.45		sen-	Os06g0251100
BRADI_1g44307v3	1.41		sen+
BRADI_1g44317v3	1.69		sen+	Os06g0250600
BRADI_1g44357v3	2.79		sen+	Os06g0250600
BRADI_1g44430v3	2.52		sen+	Os06g0247900
BRADI_1g44480v3	5.79		sen+	Os06g0246500
BRADI_1g44530v3	-1.43	0.49	sen-/tol+	Os06g0245800
BRADI_1g44630v3	2.82		sen+	Os06g0289900
BRADI_1g44640v3	-0.6		sen-	Os06g0239700
BRADI_1g44720v3	-3.38		sen-	Os06g0238700
BRADI_1g44850v3	-1.3		sen-
BRADI_1g44890v3	-1.14		sen-	Os06g0235200
BRADI_1g44920v3	2.39		sen+	Os06g0234600
BRADI_1g45010v3	-0.76		sen-	Os06g0232600
BRADI_1g45040v3	-1.11		sen-	Os06g0232100
BRADI_1g45050v3	1.29		sen+	Os06g0232000
BRADI_1g45090v3	-1.48		sen-	Os01g0175850
BRADI_1g45113v3	1.22		sen+
BRADI_1g45140v3	1.51		sen+	Os06g0229400
BRADI_1g45160v3	9.2		sen+	Os06g0229000
BRADI_1g45180v3	-1.86		sen-	Os06g0228600
BRADI_1g45190v3	1.42		sen+	Os06g0228500
BRADI_1g45193v3	0.99		sen+
BRADI_1g45297v3	0.72		sen+	Os06g0225900
BRADI_1g45370v3	0.81		sen+	Os06g0224200
BRADI_1g45380v3	-1		sen-
BRADI_1g45440v3	4.73		sen+	Os06g0222900
BRADI_1g45470v3	0.91		sen+	Os06g0222400
BRADI_1g45500v3	1.24		sen+	Os06g0221100
BRADI_1g45530v3	-1.75		sen-
BRADI_1g45535v3	-5.2		sen-
BRADI_1g45551v3	-0.83		sen-	Os10g0464901
BRADI_1g45567v3	-7.46		sen-	Os06g0220500
BRADI_1g45580v3	2.71		sen+	Os06g0220000
BRADI_1g45647v3	2.16		sen+	Os06g0219400
BRADI_1g45710v3	2.88		sen+	Os06g0218600
BRADI_1g45751v3	-1.27		sen-
BRADI_1g45760v3	-2.62		sen-
BRADI_1g45833v3	-1.3		sen-	Os06g0217600
BRADI_1g45884v3	1.47		sen+
BRADI_1g45910v3	-1.19		sen-	Os06g0215100
BRADI_1g45960v3	1.2		sen+	Os06g0214300
BRADI_1g45990v3	-0.93		sen-	Os06g0213400
BRADI_1g46060v3	1.21		sen+	Os06g0211200
BRADI_1g46137v3	0.69		sen+	Os06g0210100
BRADI_1g46170v3	-2.16		sen-	Os09g0561600
BRADI_1g46260v3	-0.59		sen-	Os06g0207700
BRADI_1g46300v3	5.31		sen+	Os06g0207200
BRADI_1g46387v3	-1.4		sen-	Os06g0205600
BRADI_1g46420v3	0.8		sen+
BRADI_1g46440v3	2.28		sen+	Os06g0204400
BRADI_1g46480v3	-1.55		sen-
BRADI_1g46540v3	-1.46		sen-	Os06g0199402
BRADI_1g46596v3	-0.85		sen-	Os06g0196900
BRADI_1g46622v3	-1.98	0.57	sen-/tol+	Os07g0607200
BRADI_1g46630v3	2.78		sen+	Os06g0196200
BRADI_1g46650v3	1.09		sen+	Os06g0195900
BRADI_1g46690v3	1.08		sen+	Os06g0194000
BRADI_1g46700v3	1.46		sen+	Os06g0193400
BRADI_1g46710v3	7.34		sen+	Os06g0193300
BRADI_1g46740v3	0.71		sen+	Os06g0192900
BRADI_1g46840v3	0.9		sen+
BRADI_1g47017v3	-5.21		sen-
BRADI_1g47030v3	-3.49		sen-
BRADI_1g47140v3	-1.46	0.79	sen-/tol+	Os06g0185900
BRADI_1g47170v3	1.43		sen+	Os06g0185700
BRADI_1g47180v3	1.68		sen+
BRADI_1g47200v3	-0.96		sen-
BRADI_1g47210v3	1.38		sen+	Os07g0413800
BRADI_1g47320v3	0.68		sen+	Os06g0184300
BRADI_1g47400v3	-0.58		sen-	Os06g0183100
BRADI_1g47407v3	-0.71		sen-	Os06g0182400
BRADI_1g47501v3	0.76		sen+
BRADI_1g47570v3	3.12		sen+	Os06g0181200
BRADI_1g47710v3	-0.87		sen-	Os06g0179700
BRADI_1g47767v3	2.14		sen+	Os06g0178900
BRADI_1g47820v3	5.29		sen+
BRADI_1g47830v3	0.84		sen+	Os06g0177700
BRADI_1g47850v3	2.33		sen+	Os06g0176300
BRADI_1g47860v3	0.89		sen+	Os06g0176200
BRADI_1g47990v3	1.41		sen+	Os01g0149700
BRADI_1g48070v3	-0.91		sen-	Os06g0172200
BRADI_1g48080v3	-1.46		sen-	Os06g0172000
BRADI_1g48147v3	-1.38		sen-	Os06g0168800
BRADI_1g48250v3	0.9		sen+	Os06g0167200
BRADI_1g48320v3	1.9		sen+	Os06g0166400
BRADI_1g48370v3	-1.35		sen-	Os06g0165800
BRADI_1g48410v3	-0.56		sen-	Os06g0164100
BRADI_1g48477v3	-0.66		sen-	Os06g0163200
BRADI_1g48530v3	-0.68		sen-	Os06g0162600
BRADI_1g48641v3	-2.68		sen-
BRADI_1g48670v3	0.94		sen+	Os11g0155600
BRADI_1g48690v3	-1.2		sen-
BRADI_1g48697v3	1.71		sen+	Os11g0155600
BRADI_1g48826v3	1.14		sen+
BRADI_1g49040v3	-1.01		sen-	Os06g0155600
BRADI_1g49047v3	-0.67		sen-
BRADI_1g49100v3	-0.73		sen-	Os06g0154500
BRADI_1g49107v3	0.74		sen+	Os06g0154400
BRADI_1g49160v3	1.85		sen+	Os06g0153200
BRADI_1g49180v3	-2.52		sen-	Os06g0152800
BRADI_1g49240v3	0.86		sen+	Os06g0152300
BRADI_1g49260v3	-0.68		sen-	Os06g0152200
BRADI_1g49350v3	-0.95		sen-	Os06g0151100
BRADI_1g49490v3	-0.96		sen-	Os06g0125800
BRADI_1g49527v3	1.3		sen+
BRADI_1g49600v3	0.69		sen+	Os06g0127500
BRADI_1g49620v3	-0.72		sen-	Os06g0127700
BRADI_1g49657v3	1.31		sen+	Os06g0128400
BRADI_1g49663v3	1.13		sen+
BRADI_1g49707v3	1.24		sen+	Os06g0129000
BRADI_1g49720v3	0.94		sen+	Os06g0129100
BRADI_1g49730v3	-0.59		sen-	Os06g0129200
BRADI_1g49750v3	1		sen+	Os04g0320200
BRADI_1g49758v3	-1.62		sen-
BRADI_1g49760v3	1.17		sen+	Os04g0551800
BRADI_1g49770v3	-2.18	0.5	sen-/tol+	Os03g0563300
BRADI_1g49780v3	1.72		sen+	Os07g0294800
BRADI_1g49790v3	-2.13	-0.64	ΔLFC>1	Os06g0129400
BRADI_1g49820v3	2.28		sen+	Os06g0129800
BRADI_1g49840v3	-2.88		sen-	Os06g0129900
BRADI_1g49966v3	-0.97		sen-	Os06g0130400
BRADI_1g50030v3	3.16		sen+	Os06g0132500
BRADI_1g50040v3	-2.03		sen-	Os06g0132400
BRADI_1g50057v3	1.75		sen+	Os06g0131700
BRADI_1g50110v3	-1.6		sen-
BRADI_1g50180v3	0.75		sen+	Os04g0397000
BRADI_1g50230v3	-0.73		sen-	Os06g0111400
BRADI_1g50250v3	-1.15		sen-	Os06g0111300
BRADI_1g50270v3	-1.01		sen-	Os06g0114000
BRADI_1g50280v3	-1.67		sen-	Os06g0113900
BRADI_1g50360v3	0.78		sen+	Os06g0111200
BRADI_1g50370v3	1.2		sen+	Os06g0111200
BRADI_1g50390v3	1.64		sen+
BRADI_1g50440v3	3.26		sen+	Os10g0381200
BRADI_1g50520v3	1.04		sen+	Os06g0115200
BRADI_1g50540v3	0.64		sen+	Os06g0115300
BRADI_1g50597v3	0.67		sen+	Os06g0116200
BRADI_1g50620v3	-1.95		sen-	Os06g0116400
BRADI_1g50780v3	-1.99		sen-
BRADI_1g50810v3	0.65		sen+	Os06g0150400
BRADI_1g50821v3	-1.44		sen-
BRADI_1g50826v3	-1.11		sen-	Os06g0149900
BRADI_1g50832v3	-1.13		sen-	Os06g0149900
BRADI_1g50840v3	-3.92		sen-	Os06g0149700
BRADI_1g50850v3	0.79		sen+	Os06g0149500
BRADI_1g50860v3	1.15		sen+	Os06g0149400
BRADI_1g50897v3	-2.49		sen-	Os06g0149100
BRADI_1g50963v3	1.29		sen+
BRADI_1g50970v3	1.94		sen+
BRADI_1g51000v3	-0.66		sen-	Os11g0226100
BRADI_1g51010v3	-0.69		sen-	Os06g0146400
BRADI_1g51020v3	-0.8		sen-
BRADI_1g51130v3	1.06		sen+	Os06g0142800
BRADI_1g51200v3	1.27		sen+	Os06g0143700
BRADI_1g51210v3	0.66		sen+	Os06g0143900
BRADI_1g51220v3	0.91		sen+	Os06g0144000
BRADI_1g51230v3	0.86		sen+
BRADI_1g51240v3	0.77		sen+	Os06g0144800
BRADI_1g51242v3	6.23		sen+
BRADI_1g51245v3	2.94		sen+	Os06g0140900
BRADI_1g51250v3	1.42		sen+	Os06g0140800
BRADI_1g51357v3	0.96		sen+	Os02g0489400
BRADI_1g51470v3	-1.1		sen-	Os06g0137600
BRADI_1g51480v3	1.01		sen+	Os06g0137500
BRADI_1g51570v3	0.71		sen+	Os06g0136000
BRADI_1g51620v3	1.68		sen+	Os06g0134800
BRADI_1g51630v3	-1.18		sen-	Os06g0134700
BRADI_1g51633v3	-1.68		sen-
BRADI_1g51670v3	-2.21		sen-	Os06g0133800
BRADI_1g51687v3	0.76		sen+
BRADI_1g51700v3	-0.56		sen-	Os06g0112000
BRADI_1g51740v3	0.52		sen+	Os06g0112400
BRADI_1g51770v3	7.44		sen+	Os06g0110200
BRADI_1g51800v3	6.71		sen+	Os06g0110200
BRADI_1g51830v3	-2.03		sen-	Os06g0109600
BRADI_1g51840v3	1.73		sen+	Os06g0109500
BRADI_1g51850v3	2.17		sen+	Os03g0645900
BRADI_1g51897v3	2.26		sen+	Os06g0109100
BRADI_1g51910v3	-1.59		sen-	Os06g0109200
BRADI_1g51920v3	-1.47		sen-	Os06g0109300
BRADI_1g51954v3	-0.8		sen-	Os11g0462500
BRADI_1g51980v3	-2.04		sen-	Os06g0108900
BRADI_1g52011v3	-1.48		sen-	Os12g0450300
BRADI_1g52020v3	-1.69		sen-	Os06g0107700
BRADI_1g52040v3	0.79		sen+	Os09g0485900
BRADI_1g52050v3	-2.17		sen-	Os06g0106800
BRADI_1g52080v3	-2.01		sen-	Os06g0107100
BRADI_1g52150v3	0.81		sen+	Os06g0103800
BRADI_1g52170v3	-0.98		sen-	Os06g0104000
BRADI_1g52230v3	1.16		sen+	Os12g0279000
BRADI_1g52250v3	0.64		sen+	Os05g0528900
BRADI_1g52280v3	-0.82		sen-	Os02g0719800
BRADI_1g52291v3	2.47		sen+	Os06g0103300
BRADI_1g52330v3	-1.53	0.82	sen-/tol+	Os06g0103600
BRADI_1g52350v3	0.93		sen+	Os06g0103200
BRADI_1g52374v3	-1.22		sen-	Os01g0680600
BRADI_1g52390v3	-0.56		sen-	Os06g0102700
BRADI_1g52460v3	-3.43	0.43	sen-/tol+	Os06g0101600
BRADI_1g52470v3	-3.35		sen-
BRADI_1g52520v3	-0.53		sen-	Os07g0419800
BRADI_1g52540v3	-2.02		sen-	Os07g0408500
BRADI_1g52550v3	-0.81		sen-	Os08g0526300
BRADI_1g52551v3	-0.67		sen-
BRADI_1g52610v3	1.76		sen+	Os07g0294800
BRADI_1g52621v3	0.9		sen+
BRADI_1g52650v3	1.06		sen+	Os07g0301200
BRADI_1g52670v3	-1.27		sen-	Os07g0409200
BRADI_1g52707v3	-0.7		sen-	Os07g0287100
BRADI_1g52720v3	0.52		sen+	Os07g0283200
BRADI_1g52740v3	2.14		sen+	Os07g0281800
BRADI_1g52975v3	-1.16		sen-
BRADI_1g52990v3	-0.7		sen-	Os07g0272400
BRADI_1g53050v3	-1.21		sen-	Os07g0264800
BRADI_1g53060v3	-1.9		sen-	Os07g0263400
BRADI_1g53100v3	-1.39		sen-	Os07g0260300
BRADI_1g53105v3	-1.61		sen-
BRADI_1g53120v3	2.25		sen+	Os07g0259700
BRADI_1g53290v3		-1.07	tol-	Os07g0250900
BRADI_1g53295v3	1.07		sen+
BRADI_1g53360v3	-0.74		sen-	Os07g0247100
BRADI_1g53437v3	-2.05		sen-	Os07g0245100
BRADI_1g53527v3	1.69		sen+	Os07g0241700
BRADI_1g53550v3	-1.06		sen-
BRADI_1g53560v3	-2.27		sen-	Os07g0240600
BRADI_1g53567v3	1.3		sen+	Os07g0240400
BRADI_1g53654v3	-0.95		sen-
BRADI_1g53670v3	-1.83		sen-	Os07g0232900
BRADI_1g53680v3	-2.01		sen-	Os07g0232800
BRADI_1g53690v3	1.15		sen+	Os07g0231800
BRADI_1g53710v3	-2.01		sen-
BRADI_1g53720v3	0.94		sen+	Os07g0230600
BRADI_1g53747v3	-2.99		sen-	Os07g0229800
BRADI_1g53790v3	1.38		sen+	Os07g0224900
BRADI_1g53823v3	0.81		sen+
BRADI_1g53857v3	0.58		sen+	Os07g0223700
BRADI_1g53867v3	1.01		sen+	Os07g0223400
BRADI_1g53936v3	-2.49		sen-
BRADI_1g54007v3	-1.54		sen-	Os07g0213300
BRADI_1g54030v3	-2.73	0.8	sen-/tol+	Os07g0212200
BRADI_1g54037v3		0.6	tol+	Os07g0211900
BRADI_1g54060v3	1.9		sen+	Os07g0211700
BRADI_1g54106v3	-1.31		sen-
BRADI_1g54167v3	-1.09		sen-
BRADI_1g54210v3	1.38		sen+	Os07g0209100
BRADI_1g54270v3	0.77		sen+
BRADI_1g54305v3	0.9		sen+	Os07g0206700
BRADI_1g54327v3	-0.84		sen-	Os07g0205700
BRADI_1g54420v3	-1.52		sen-
BRADI_1g54440v3	0.83		sen+	Os07g0204100
BRADI_1g54450v3	6.46		sen+	Os07g0204000
BRADI_1g54457v3	0.61		sen+	Os07g0203700
BRADI_1g54480v3	1.24		sen+	Os07g0202900
BRADI_1g54537v3	0.59		sen+	Os07g0200000
BRADI_1g54553v3	3.15		sen+	Os07g0198300
BRADI_1g54570v3	0.88		sen+	Os04g0434300
BRADI_1g54592v3	1.16		sen+
BRADI_1g54630v3	1.59		sen+	Os07g0195100
BRADI_1g54680v3	0.53		sen+	Os07g0194000
BRADI_1g54800v3	1.74		sen+	Os07g0192000
BRADI_1g54840v3	-1.47		sen-	Os07g0191500
BRADI_1g54847v3	-0.55		sen-	Os07g0191200
BRADI_1g54900v3	1.54		sen+	Os06g0151600
BRADI_1g54920v3	-1.08		sen-	Os07g0189700
BRADI_1g54970v3	-1.33		sen-
BRADI_1g54990v3	1.27		sen+	Os07g0187900
BRADI_1g55007v3	-1.51		sen-	Os07g0187400
BRADI_1g55063v3	2.14		sen+
BRADI_1g55080v3	-2.07		sen-	Os07g0186500
BRADI_1g55100v3	-0.76		sen-	Os07g0186000
BRADI_1g55120v3	-0.75		sen-	Os07g0185900
BRADI_1g55170v3	-0.64		sen-	Os07g0185432
BRADI_1g55180v3	-0.66		sen-	Os07g0185300
BRADI_1g55300v3	-0.59		sen-	Os02g0143100
BRADI_1g55330v3	1.58		sen+	Os05g0211100
BRADI_1g55415v3	1.08		sen+
BRADI_1g55480v3	3.15		sen+	Os07g0181500
BRADI_1g55484v3	1.79		sen+
BRADI_1g55488v3	-1.59		sen-
BRADI_1g55560v3	4.13		sen+
BRADI_1g55570v3	3.12		sen+
BRADI_1g55580v3	3.67		sen+	Os07g0178800
BRADI_1g55610v3	5.81		sen+
BRADI_1g55620v3	1.99		sen+
BRADI_1g55640v3	-0.99		sen-	Os07g0178100
BRADI_1g55690v3	-0.72		sen-	Os04g0303900
BRADI_1g55710v3	3.68		sen+	Os07g0176200
BRADI_1g55730v3	-1.8		sen-	Os07g0176600
BRADI_1g55740v3	-1.98		sen-	Os07g0176900
BRADI_1g55770v3	3.24		sen+	Os07g0175600
BRADI_1g55780v3	3.12		sen+	Os07g0175500
BRADI_1g55790v3	1.03		sen+
BRADI_1g55825v3	3.73		sen+	Os07g0123100
BRADI_1g55830v3	1.68		sen+	Os07g0123100
BRADI_1g55876v3	-3.23		sen-	Os07g0175300
BRADI_1g55980v3	0.97		sen+	Os07g0174200
BRADI_1g56040v3	-0.71		sen-	Os07g0172600
BRADI_1g56130v3	-1.28	0.48	sen-/tol+	Os07g0171100
BRADI_1g56137v3	-1		sen-	Os07g0170200
BRADI_1g56160v3	-0.76		sen-	Os07g0561500
BRADI_1g56240v3	-1.08		sen-	Os07g0169600
BRADI_1g56260v3	-4.07		sen-
BRADI_1g56270v3	-3.85		sen-	Os07g0168600
BRADI_1g56280v3	-0.96	0.64	sen-/tol+	Os07g0168000
BRADI_1g56546v3	1.41		sen+
BRADI_1g56580v3	-2.21		sen-	Os01g0501800
BRADI_1g56600v3	-0.98		sen-	Os07g0165200
BRADI_1g56606v3	-1.04		sen-
BRADI_1g56620v3	1.07		sen+
BRADI_1g56640v3	-0.71		sen-	Os07g0165000
BRADI_1g56660v3	-0.75		sen-
BRADI_1g56667v3	-1.28		sen-	Os07g0164900
BRADI_1g56680v3	1.07		sen+
BRADI_1g56730v3	-1.93		sen-
BRADI_1g56817v3	-4.78		sen-	Os07g0162700
BRADI_1g56860v3	-5.84		sen-
BRADI_1g56880v3	-1.49		sen-	Os07g0163000
BRADI_1g56922v3	-2.43		sen-
BRADI_1g56930v3	-1.99		sen-	Os07g0162100
BRADI_1g56937v3	-1.71		sen-	Os07g0162100
BRADI_1g56990v3	0.97		sen+	Os03g0788800
BRADI_1g57000v3	-2.15		sen-	Os06g0204100
BRADI_1g57100v3	-1.42		sen-	Os07g0159700
BRADI_1g57110v3	0.61		sen+	Os07g0159800
BRADI_1g57147v3	-1.75		sen-	Os07g0158800
BRADI_1g57240v3	-2.49		sen-	Os01g0389700
BRADI_1g57337v3	7.5		sen+
BRADI_1g57430v3	-0.65		sen-	Os07g0123300
BRADI_1g57457v3	0.69		sen+	Os07g0123500
BRADI_1g57470v3	-1.9		sen-	Os03g0425200
BRADI_1g57510v3	1.3		sen+
BRADI_1g57552v3	-2.5		sen-	Os07g0124750
BRADI_1g57590v3	-4.54		sen-
BRADI_1g57657v3	-3.4		sen-
BRADI_1g57690v3	-1.63		sen-
BRADI_1g57702v3	-1.07		sen-
BRADI_1g57725v3	-1.61		sen-
BRADI_1g57750v3	-0.9		sen-	Os09g0268000
BRADI_1g57810v3	-3.2		sen-	Os09g0268000
BRADI_1g57880v3	-0.92		sen-	Os07g0134000
BRADI_1g57910v3	-0.66		sen-	Os07g0134600
BRADI_1g57920v3	-1.15		sen-	Os07g0134700
BRADI_1g58080v3	0.94		sen+	Os07g0139400
BRADI_1g58116v3	-0.86		sen-
BRADI_1g58160v3	-2.83		sen-	Os07g0141400
BRADI_1g58220v3	-0.81		sen-	Os07g0143000
BRADI_1g58240v3	-2.44		sen-	Os07g0143600
BRADI_1g58297v3	-1.59		sen-	Os07g0147700
BRADI_1g58317v3	0.69		sen+	Os08g0243100
BRADI_1g58350v3	-2.38		sen-	Os07g0148900
BRADI_1g58380v3	1.83		sen+	Os07g0150100
BRADI_1g58450v3	-0.8		sen-	Os07g0152000
BRADI_1g58480v3	-1.52		sen-	Os07g0152900
BRADI_1g58500v3	-0.81		sen-	Os07g0153300
BRADI_1g58550v3	3.55		sen+	Os07g0153600
BRADI_1g58580v3	6.83		sen+	Os07g0154100
BRADI_1g58600v3	-1.8		sen-	Os06g0332800
BRADI_1g58746v3	-3.53		sen-
BRADI_1g58830v3	1.22		sen+
BRADI_1g58864v3	1.65		sen+
BRADI_1g58940v3	-0.8		sen-
BRADI_1g58976v3	-2.39		sen-
BRADI_1g58997v3	-4.3	0.58	sen-/tol+
BRADI_1g59070v3	-1.44		sen-	Os07g0113500
BRADI_1g59180v3	-2.19		sen-
BRADI_1g59216v3	0.7		sen+
BRADI_1g59220v3	-1.19		sen-	Os07g0108300
BRADI_1g59260v3	1.03		sen+
BRADI_1g59360v3	1.34		sen+	Os07g0107800
BRADI_1g59380v3	1.06		sen+
BRADI_1g59410v3	0.62		sen+	Os02g0103900
BRADI_1g59420v3	-2.48		sen-	Os07g0106200
BRADI_1g59500v3	-1.68		sen-	Os07g0105600
BRADI_1g59570v3		1.4	tol+	Os07g0103500
BRADI_1g59600v3	-1.3		sen-	Os07g0103100
BRADI_1g59680v3	-5.2		sen-	Os09g0380300
BRADI_1g59690v3	-1.99		sen-
BRADI_1g59730v3	-1.66		sen-	Os07g0102100
BRADI_1g59790v3	-1.78		sen-
BRADI_1g59820v3	-0.84		sen-	Os07g0100900
BRADI_1g59860v3	-1.98		sen-	Os07g0100300
BRADI_1g59870v3	-1.69		sen-	Os07g0100200
BRADI_1g59930v3	0.58		sen+	Os03g0418800
BRADI_1g59970v3	1.16		sen+	Os06g0498500
BRADI_1g59990v3	-1.15		sen-	Os03g0414400
BRADI_1g60010v3	0.63		sen+	Os03g0413400
BRADI_1g60030v3	-2.75	0.64	sen-/tol+	Os03g0413000
BRADI_1g60050v3	-1.9		sen-	Os03g0412800
BRADI_1g60100v3	-1.98		sen-	Os03g0410700
BRADI_1g60104v3	-1.64		sen-
BRADI_1g60207v3	-1.54		sen-	Os03g0407000
BRADI_1g60260v3	0.81		sen+	Os03g0405500
BRADI_1g60270v3	0.51		sen+	Os03g0405100
BRADI_1g60300v3	-1.13		sen-
BRADI_1g60310v3	0.84		sen+
BRADI_1g60320v3	1.3		sen+	Os03g0401300
BRADI_1g60340v3	-1.08		sen-
BRADI_1g60350v3	-1.46		sen-	Os03g0400700
BRADI_1g60380v3	2.19		sen+	Os03g0399000
BRADI_1g60410v3	5.96		sen+	Os03g0397600
BRADI_1g60600v3	-2.21		sen-	Os03g0393700
BRADI_1g60662v3	-1.1		sen-
BRADI_1g60750v3	1.98		sen+	Os03g0389700
BRADI_1g60756v3	-0.76		sen-	Os03g0389501
BRADI_1g60787v3	1.64		sen+
BRADI_1g60810v3	3.04		sen+	Os03g0388800
BRADI_1g60830v3	1.05		sen+	Os07g0415200
BRADI_1g60840v3	-1.68		sen-	Os03g0388100
BRADI_1g60846v3	-0.86		sen-	Os03g0387900
BRADI_1g60910v3	-1.31		sen-	Os03g0386800
BRADI_1g60950v3	2.07		sen+	Os03g0386500
BRADI_1g60970v3	-1.11		sen-	Os03g0385100
BRADI_1g60972v3	-1.35		sen-
BRADI_1g61010v3	-4.67		sen-	Os03g0382100
BRADI_1g61020v3	-1.67		sen-
BRADI_1g61090v3	1.32		sen+
BRADI_1g61110v3	1.1		sen+
BRADI_1g61180v3	0.66		sen+	Os03g0378000
BRADI_1g61260v3	-1.59		sen-	Os03g0376100
BRADI_1g61320v3	5.9		sen+	Os03g0374600
BRADI_1g61330v3	1		sen+	Os03g0374575
BRADI_1g61350v3	2.1		sen+	Os03g0374400
BRADI_1g61380v3	0.79		sen+	Os03g0372700
BRADI_1g61390v3	-2.13		sen-	Os03g0372600
BRADI_1g61413v3	1.54		sen+
BRADI_1g61420v3	1.37		sen+	Os03g0370900
BRADI_1g61425v3	0.96		sen+
BRADI_1g61430v3	2.47		sen+	Os03g0370900
BRADI_1g61470v3	4.04		sen+	Os03g0370400
BRADI_1g61497v3	-0.7		sen-	Os03g0370000
BRADI_1g61510v3	0.55		sen+	Os03g0369800
BRADI_1g61560v3	-2		sen-	Os08g0101800
BRADI_1g61568v3	-2.13		sen-
BRADI_1g61720v3	0.58		sen+	Os03g0363900
BRADI_1g61740v3	0.97		sen+	Os03g0363700
BRADI_1g61757v3	-1.64		sen-	Os03g0363500
BRADI_1g61800v3	-0.68		sen-	Os03g0360700
BRADI_1g61810v3	-2.5		sen-	Os03g0360600
BRADI_1g61820v3	-0.72		sen-	Os03g0360500
BRADI_1g62007v3	0.68		sen+
BRADI_1g62063v3	-2.23		sen-
BRADI_1g62160v3	-0.74		sen-	Os03g0356400
BRADI_1g62170v3	-1.58		sen-	Os03g0356300
BRADI_1g62220v3	-1.29		sen-	Os05g0100008
BRADI_1g62240v3	-1.71		sen-
BRADI_1g62270v3	4		sen+	Os12g0624200
BRADI_1g62300v3	1.17		sen+	Os03g0353400
BRADI_1g62360v3	0.8		sen+
BRADI_1g62370v3	-1.41		sen-
BRADI_1g62385v3	1.76		sen+
BRADI_1g62400v3	-3.17		sen-	Os03g0351300
BRADI_1g62410v3	-2.4		sen-	Os03g0351200
BRADI_1g62430v3	2.22		sen+	Os03g0350300
BRADI_1g62450v3	-0.73		sen-
BRADI_1g62574v3	-1.07		sen-
BRADI_1g62652v3	-3.27		sen-	Os07g0671000
BRADI_1g62700v3	1.21		sen+	Os03g0345100
BRADI_1g62720v3	-0.79		sen-	Os03g0344900
BRADI_1g62731v3	-0.63		sen-	Os03g0344700
BRADI_1g62780v3	0.69		sen+	Os03g0344100
BRADI_1g62800v3	1.41		sen+	Os03g0343700
BRADI_1g62830v3	1.34		sen+	Os03g0343500
BRADI_1g62840v3	-0.66		sen-	Os03g0343400
BRADI_1g62850v3	0.97		sen+	Os03g0343300
BRADI_1g62880v3	-4.59		sen-	Os03g0341600
BRADI_1g62890v3	2.76		sen+	Os03g0341300
BRADI_1g62910v3	-1.23		sen-
BRADI_1g62920v3	1.19		sen+	Os05g0314700
BRADI_1g62930v3	1.23		sen+
BRADI_1g62940v3	-1.41		sen-	Os03g0340900
BRADI_1g62950v3	-0.68		sen-	Os03g0340700
BRADI_1g62957v3	4.12		sen+	Os03g0340500
BRADI_1g63050v3	-0.59		sen-	Os03g0338600
BRADI_1g63067v3	2.17		sen+	Os03g0339400
BRADI_1g63080v3	-1.42		sen-	Os03g0339900
BRADI_1g63087v3	-0.89		sen-	Os03g0340001
BRADI_1g63100v3	-0.98		sen-	Os03g0337500
BRADI_1g63127v3	0.82		sen+	Os03g0336700
BRADI_1g63190v3	-1.71		sen-	Os03g0336000
BRADI_1g63277v3	-0.97		sen-	Os03g0334100
BRADI_1g63290v3	-1.7		sen-	Os03g0334000
BRADI_1g63300v3	-2.17	0.53	sen-/tol+	Os03g0333400
BRADI_1g63330v3	1.29		sen+	Os03g0333100
BRADI_1g63397v3	8.04		sen+	Os03g0332500
BRADI_1g63460v3	-1.6		sen-	Os03g0332100
BRADI_1g63480v3	-0.79		sen-	Os03g0331700
BRADI_1g63490v3	-1.06		sen-	Os03g0331600
BRADI_1g63510v3	6.76		sen+	Os03g0330200
BRADI_1g63520v3	-1		sen-	Os03g0330000
BRADI_1g63530v3	-0.67		sen-	Os03g0329900
BRADI_1g63540v3	1.14		sen+	Os07g0164500
BRADI_1g63550v3	-1.68		sen-	Os03g0329700
BRADI_1g63600v3	3.61		sen+	Os03g0327800
BRADI_1g63605v3	1.89		sen+
BRADI_1g63610v3	2.97		sen+	Os03g0327600
BRADI_1g63640v3	0.66		sen+	Os03g0326500
BRADI_1g63700v3	1.36		sen+	Os01g0160800
BRADI_1g63720v3	-0.93		sen-	Os03g0324900
BRADI_1g63740v3	0.74		sen+	Os03g0324700
BRADI_1g63800v3	0.66		sen+	Os03g0323800
BRADI_1g63816v3	5.21		sen+
BRADI_1g63840v3	-1.87		sen-
BRADI_1g63850v3	-1.14		sen-	Os03g0322600
BRADI_1g63900v3	-1.13		sen-	Os03g0321800
BRADI_1g63910v3	3.06		sen+	Os03g0321700
BRADI_1g63927v3	2.31		sen+
BRADI_1g63940v3	0.72		sen+	Os03g0321400
BRADI_1g64001v3	-1.52		sen-	Os03g0320000
BRADI_1g64010v3	-1.5		sen-	Os03g0319400
BRADI_1g64020v3	-1.5		sen-	Os03g0319300
BRADI_1g64050v3	-1.65		sen-
BRADI_1g64070v3	1.11		sen+	Os03g0318500
BRADI_1g64130v3	-1.48	0.61	sen-/tol+	Os03g0315800
BRADI_1g64150v3	-0.54		sen-	Os03g0314800
BRADI_1g64160v3	-0.99		sen-	Os03g0314700
BRADI_1g64200v3	-1.14		sen-	Os03g0313800
BRADI_1g64226v3	-1.71		sen-
BRADI_1g64267v3	-1.3		sen-	Os03g0311300
BRADI_1g64290v3	-1.03		sen-	Os03g0310800
BRADI_1g64310v3	0.65		sen+	Os03g0310500
BRADI_1g64444v3	-1.15		sen-
BRADI_1g64520v3	1		sen+	Os03g0307000
BRADI_1g64540v3	-0.86		sen-	Os03g0306800
BRADI_1g64560v3	-2.51		sen-	Os03g0306100
BRADI_1g64580v3	0.89		sen+	Os03g0305700
BRADI_1g64590v3	5.65		sen+	Os03g0305600
BRADI_1g64630v3	2.64		sen+	Os03g0305100
BRADI_1g64640v3	-1.88		sen-	Os03g0305000
BRADI_1g64670v3	1.41		sen+	Os03g0304100
BRADI_1g64680v3	0.69		sen+
BRADI_1g64687v3	3.57		sen+
BRADI_1g64698v3	3.13		sen+
BRADI_1g64730v3	0.61		sen+	Os03g0302500
BRADI_1g64830v3	0.99		sen+	Os03g0300900
BRADI_1g64927v3	1.47		sen+	Os03g0300300
BRADI_1g64940v3	0.81		sen+	Os03g0300200
BRADI_1g64950v3	1.37		sen+	Os03g0300000
BRADI_1g64978v3	-1.27		sen-	Os03g0299600
BRADI_1g65081v3	1.08		sen+	Os03g0298300
BRADI_1g65120v3	1.13		sen+	Os03g0297700
BRADI_1g65130v3	-8.09	-1.01	ΔLFC>1	Os03g0297600
BRADI_1g65150v3	0.88		sen+	Os03g0297300
BRADI_1g65400v3	1.73		sen+	Os11g0549670
BRADI_1g65461v3	-1.44		sen-	Os08g0494400
BRADI_1g65467v3	-0.85		sen-	Os03g0293100
BRADI_1g65480v3	-0.51		sen-
BRADI_1g65501v3	-4.12		sen-	Os03g0292600
BRADI_1g65510v3	0.77		sen+	Os03g0292200
BRADI_1g65540v3	2.67		sen+	Os03g0291500
BRADI_1g65571v3	0.61		sen+	Os03g0290500
BRADI_1g65580v3	-1		sen-	Os03g0290300
BRADI_1g65600v3	-2.44		sen-	Os03g0289400
BRADI_1g65630v3	0.87		sen+	Os03g0289100
BRADI_1g65657v3	0.79		sen+	Os03g0288700
BRADI_1g65710v3	0.62		sen+	Os03g0287900
BRADI_1g65725v3	0.75		sen+	Os03g0178000
BRADI_1g65780v3	4.09		sen+	Os03g0286900
BRADI_1g65820v3		1.04	tol+	Os03g0285700
BRADI_1g65825v3	-2.31		sen-
BRADI_1g65860v3	-0.81		sen-	Os03g0284900
BRADI_1g65880v3	-0.69		sen-	Os03g0284600
BRADI_1g65900v3	-1.73		sen-	Os03g0284400
BRADI_1g65940v3	0.81		sen+
BRADI_1g65950v3	0.88		sen+	Os03g0283600
BRADI_1g65958v3	1.69		sen+
BRADI_1g66090v3	-1.8	0.52	sen-/tol+	Os06g0484500
BRADI_1g66100v3	0.74		sen+	Os03g0412300
BRADI_1g66120v3	1.39		sen+	Os03g0281900
BRADI_1g66142v3	0.75		sen+
BRADI_1g66150v3	0.62		sen+	Os03g0281600
BRADI_1g66163v3	-1.55		sen-	Os07g0189400
BRADI_1g66220v3	0.77		sen+	Os03g0281000
BRADI_1g66227v3	2.16		sen+	Os03g0280800
BRADI_1g66250v3	0.67		sen+	Os02g0221600
BRADI_1g66270v3	-1.79		sen-	Os04g0373400
BRADI_1g66280v3	-1.18		sen-	Os03g0280400
BRADI_1g66296v3	-2.73		sen-	Os03g0279950
BRADI_1g66317v3	-3.14		sen-
BRADI_1g66350v3	-0.98		sen-	Os03g0279400
BRADI_1g66380v3	0.59		sen+	Os08g0490900
BRADI_1g66460v3	8.36		sen+	Os03g0277500
BRADI_1g66470v3	3.53		sen+	Os03g0277300
BRADI_1g66480v3	-1.02		sen-	Os03g0277100
BRADI_1g66533v3	-1.08		sen-
BRADI_1g66590v3	1.11		sen+	Os03g0276500
BRADI_1g66640v3		0.9	tol+	Os03g0275300
BRADI_1g66660v3	-0.52		sen-	Os03g0274800
BRADI_1g66687v3	0.65		sen+	Os03g0274000
BRADI_1g66710v3	1.23		sen+	Os03g0273800
BRADI_1g66740v3	0.58		sen+	Os03g0786700
BRADI_1g66770v3	3.68		sen+	Os03g0271900
BRADI_1g66790v3	-2.01	0.81	sen-/tol+	Os03g0271500
BRADI_1g66830v3	-0.98	0.45	sen-/tol+	Os03g0271100
BRADI_1g66890v3	1.72		sen+	Os03g0269900
BRADI_1g66893v3	1.89		sen+
BRADI_1g66913v3	2.1		sen+
BRADI_1g66920v3	5.22		sen+	Os03g0268600
BRADI_1g66940v3	-0.95		sen-	Os03g0268300
BRADI_1g66950v3	-0.66		sen-	Os03g0268200
BRADI_1g66980v3	-2.26		sen-	Os03g0267800
BRADI_1g67020v3	-1.78		sen-	Os03g0267300
BRADI_1g67040v3	3.08		sen+
BRADI_1g67100v3	-0.68		sen-	Os03g0266100
BRADI_1g67110v3	-1.48		sen-	Os03g0266000
BRADI_1g67115v3	-1.14		sen-
BRADI_1g67120v3	-2.06		sen-	Os03g0265900
BRADI_1g67127v3	-1.69		sen-	Os03g0265800
BRADI_1g67150v3	1.01		sen+	Os12g0295600
BRADI_1g67160v3	-0.68		sen-	Os03g0265500
BRADI_1g67170v3	-1.8	0.72	sen-/tol+	Os03g0265400
BRADI_1g67200v3	-1.59		sen-	Os03g0265100
BRADI_1g67205v3	-1.14		sen-
BRADI_1g67220v3	-0.76		sen-	Os03g0264700
BRADI_1g67270v3	-1.33		sen-	Os03g0263900
BRADI_1g67365v3	-1.64		sen-
BRADI_1g67440v3	-0.77		sen-	Os03g0261800
BRADI_1g67480v3	-0.55		sen-	Os11g0572700
BRADI_1g67530v3	-1.53		sen-	Os03g0259900
BRADI_1g67620v3	-2.19		sen-	Os05g0131500
BRADI_1g67640v3	1		sen+	Os03g0257600
BRADI_1g67730v3	-3		sen-	Os03g0255500
BRADI_1g67740v3	-1.35		sen-
BRADI_1g67830v3	-2.07		sen-	Os03g0254200
BRADI_1g67900v3	0.75		sen+	Os03g0253100
BRADI_1g67930v3	1.08		sen+	Os03g0252100
BRADI_1g67980v3	-3.16		sen-
BRADI_1g67990v3	-2.65	0.54	sen-/tol+	Os03g0244000
BRADI_1g68010v3	-1.88		sen-	Os03g0250000
BRADI_1g68025v3	1.34		sen+
BRADI_1g68030v3	0.86		sen+	Os03g0249700
BRADI_1g68050v3	0.89		sen+	Os03g0249300
BRADI_1g68070v3	-1.11		sen-	Os03g0249100
BRADI_1g68120v3	1.08		sen+	Os03g0247900
BRADI_1g68160v3	-0.74		sen-	Os03g0247000
BRADI_1g68210v3	0.7		sen+	Os03g0241900
BRADI_1g68260v3	-2.71		sen-	Os03g0242300
BRADI_1g68330v3	-2.07		sen-	Os03g0243900
BRADI_1g68340v3	2.73		sen+	Os03g0244200
BRADI_1g68367v3	-1.21		sen-
BRADI_1g68372v3	1.93		sen+
BRADI_1g68390v3	5.14		sen+	Os03g0245200
BRADI_1g68472v3	0.56		sen+
BRADI_1g68474v3	0.64		sen+
BRADI_1g68500v3	0.91		sen+	Os03g0241300
BRADI_1g68502v3	0.89		sen+
BRADI_1g68505v3	1.27		sen+	Os03g0241200
BRADI_1g68520v3	1.03		sen+	Os03g0240700
BRADI_1g68560v3	0.61		sen+	Os03g0239400
BRADI_1g68570v3	-1.25		sen-	Os03g0239300
BRADI_1g68600v3	1.02		sen+	Os03g0238800
BRADI_1g68620v3	1.21		sen+	Os08g0274700
BRADI_1g68680v3	-1.41		sen-	Os03g0238300
BRADI_1g68710v3	0.87		sen+	Os03g0237600
BRADI_1g68837v3	-1.08		sen-
BRADI_1g68843v3	-1.39		sen-
BRADI_1g68850v3	3.01		sen+	Os10g0109700
BRADI_1g68887v3	-6.77		sen-	Os03g0235000
BRADI_1g68950v3	1.62		sen+	Os03g0226400
BRADI_1g69010v3	-0.51		sen-	Os03g0227300
BRADI_1g69040v3	-2.17		sen-	Os03g0227700
BRADI_1g69057v3	1.5		sen+	Os03g0227900
BRADI_1g69080v3	0.81		sen+	Os03g0228400
BRADI_1g69120v3	-1.85		sen-	Os03g0229500
BRADI_1g69160v3	8.74		sen+	Os03g0231600
BRADI_1g69209v3	-2.53		sen-	Os03g0232200
BRADI_1g69220v3	-5.11		sen-	Os03g0232400
BRADI_1g69240v3	-1.28		sen-	Os03g0232600
BRADI_1g69250v3	3.12		sen+	Os03g0232800
BRADI_1g69330v3		2.55	tol+	Os03g0225900
BRADI_1g69350v3	0.49		sen+	Os03g0225600
BRADI_1g69360v3	0.79		sen+	Os03g0225500
BRADI_1g69390v3	-0.7		sen-	Os03g0225300
BRADI_1g69393v3	-1.47		sen-
BRADI_1g69463v3	0.64		sen+
BRADI_1g69475v3	0.83		sen+
BRADI_1g69530v3	-3.48		sen-	Os03g0223400
BRADI_1g69571v3	-2.21		sen-	Os03g0222600
BRADI_1g69590v3	0.96		sen+	Os03g0221800
BRADI_1g69627v3	0.68		sen+	Os03g0221200
BRADI_1g69637v3	-0.76		sen-	Os03g0220100
BRADI_1g69650v3	-1.62		sen-	Os03g0219900
BRADI_1g69670v3	-1.47		sen-	Os03g0219300
BRADI_1g69680v3	-0.65		sen-	Os03g0219200
BRADI_1g69710v3	-3.09		sen-	Os03g0218400
BRADI_1g69740v3	-1.23		sen-	Os03g0217000
BRADI_1g69780v3	0.7		sen+	Os03g0216600
BRADI_1g69810v3	1.04		sen+	Os03g0216300
BRADI_1g69827v3	-1.34		sen-	Os03g0215900
BRADI_1g69840v3	0.8		sen+	Os03g0215800
BRADI_1g69870v3	1.04		sen+	Os03g0215700
BRADI_1g69910v3	1.87		sen+	Os03g0215000
BRADI_1g70165v3	-0.98		sen-
BRADI_1g70190v3	2.65		sen+	Os06g0151700
BRADI_1g70226v3	-1.29		sen-
BRADI_1g70240v3	0.63		sen+
BRADI_1g70300v3	1.21		sen+	Os03g0211700
BRADI_1g70330v3	-1.3		sen-	Os03g0211600
BRADI_1g70390v3	1.81		sen+	Os06g0254300
BRADI_1g70420v3	-1.65		sen-
BRADI_1g70440v3	-1.96		sen-	Os03g0210500
BRADI_1g70580v3	1.13		sen+	Os03g0558700
BRADI_1g70610v3	1.59		sen+	Os03g0209000
BRADI_1g70637v3	0.97		sen+	Os03g0208600
BRADI_1g70680v3	2		sen+	Os03g0207400
BRADI_1g70690v3	-1.59		sen-	Os03g0207300
BRADI_1g70724v3	-0.85		sen-	gene-psbC
BRADI_1g70740v3	-0.96		sen-	Os03g0206900
BRADI_1g70761v3	-2.65		sen-	Os03g0206700
BRADI_1g70820v3	-1.96		sen-	Os03g0205800
BRADI_1g70830v3	-2.54		sen-	Os03g0205700
BRADI_1g70880v3	0.84		sen+	Os03g0205150
BRADI_1g70920v3	-1.04		sen-	Os03g0203700
BRADI_1g70930v3	-2		sen-	Os03g0203200
BRADI_1g70936v3	0.82		sen+	Os03g0203100
BRADI_1g71057v3	0.68		sen+	Os03g0201700
BRADI_1g71110v3	-0.68		sen-	Os03g0201000
BRADI_1g71120v3	-1.01		sen-	Os05g0311500
BRADI_1g71190v3	1.62		sen+	Os03g0200600
BRADI_1g71200v3	0.97		sen+	Os02g0287000
BRADI_1g71210v3	2.36		sen+	Os03g0200200
BRADI_1g71250v3	-0.83		sen-	Os03g0199000
BRADI_1g71280v3	6.1		sen+	Os03g0198600
BRADI_1g71300v3	0.96		sen+	Os01g0559100
BRADI_1g71330v3	1.67		sen+	Os03g0197800
BRADI_1g71340v3	0.59		sen+	Os03g0197400
BRADI_1g71350v3	6.08		sen+	Os03g0197300
BRADI_1g71370v3	-1.74		sen-	Os03g0197100
BRADI_1g71373v3	0.78		sen+	Os03g0197000
BRADI_1g71410v3	-0.79		sen-	Os05g0361900
BRADI_1g71420v3	-1.64	0.48	sen-/tol+
BRADI_1g71425v3	-1.63		sen-	Os03g0196800
BRADI_1g71430v3	-2.69		sen-	Os03g0185000
BRADI_1g71465v3	2.08		sen+
BRADI_1g71500v3	-1.49		sen-	Os03g0196000
BRADI_1g71510v3	-0.87		sen-	Os03g0195500
BRADI_1g71540v3	-1.27		sen-	Os03g0194900
BRADI_1g71580v3	3.27		sen+	Os03g0194300
BRADI_1g71590v3	0.61		sen+	Os03g0194100
BRADI_1g71667v3	-2.09		sen-	Os03g0192700
BRADI_1g71690v3	-1.72		sen-	Os03g0192500
BRADI_1g71800v3	-0.83		sen-	Os03g0191100
BRADI_1g71820v3	1.16		sen+	Os03g0190900
BRADI_1g71840v3	0.78		sen+	Os03g0190300
BRADI_1g71860v3	-2.85		sen-	Os03g0190100
BRADI_1g71880v3	-2.08		sen-	Os03g0189600
BRADI_1g71890v3	-0.93		sen-	Os03g0189400
BRADI_1g72007v3	0.65		sen+	Os03g0188100
BRADI_1g72080v3	-0.69		sen-	Os03g0187400
BRADI_1g72086v3	0.96		sen+	Os03g0187300
BRADI_1g72100v3	1.79		sen+	Os03g0187000
BRADI_1g72150v3	0.46		sen+	Os03g0186600
BRADI_1g72160v3	-1.29		sen-	Os03g0186500
BRADI_1g72180v3	-0.77		sen-	Os03g0186100
BRADI_1g72400v3	-0.68		sen-	Os03g0184000
BRADI_1g72449v3	-0.92		sen-	Os03g0183300
BRADI_1g72457v3	-3.06		sen-	Os03g0183000
BRADI_1g72480v3	1.01		sen+	Os03g0182600
BRADI_1g72510v3	-0.8		sen-	Os03g0181800
BRADI_1g72590v3	1.07		sen+	Os10g0391801
BRADI_1g72690v3	1.37		sen+	Os03g0179900
BRADI_1g72740v3	-0.79		sen-	Os03g0179400
BRADI_1g72750v3	1.2		sen+	Os03g0179000
BRADI_1g72770v3	1.63		sen+	Os03g0178300
BRADI_1g72780v3	-1.72	0.56	sen-/tol+	Os03g0178200
BRADI_1g72790v3	-3.08		sen-	Os03g0178100
BRADI_1g72830v3	-0.92		sen-	Os03g0177000
BRADI_1g72875v3	-1.18		sen-	Os03g0176900
BRADI_1g72910v3	1.67		sen+	Os10g0370700
BRADI_1g72960v3	1.16		sen+	Os03g0174900
BRADI_1g72963v3	1.55		sen+	Os03g0174800
BRADI_1g73110v3	0.74		sen+	Os03g0172000
BRADI_1g73200v3	-2.17		sen-	Os03g0170500
BRADI_1g73310v3	1.04		sen+
BRADI_1g73445v3	0.7		sen+
BRADI_1g73660v3	0.5		sen+
BRADI_1g73670v3	1.23		sen+	Os03g0169900
BRADI_1g73700v3	-1.13		sen-	Os03g0169800
BRADI_1g73770v3	-1.64	0.66	sen-/tol+	Os03g0169100
BRADI_1g73817v3	1.96		sen+	Os03g0168300
BRADI_1g73830v3	2.06		sen+	Os03g0168200
BRADI_1g73840v3	8.35		sen+	Os03g0168100
BRADI_1g73870v3	0.58		sen+	Os03g0167700
BRADI_1g73890v3	1.18		sen+	Os03g0167400
BRADI_1g73960v3	1.49		sen+	Os03g0166000
BRADI_1g73970v3	-2.26		sen-	Os03g0165900
BRADI_1g73990v3	-1.47		sen-	Os03g0165800
BRADI_1g74030v3	-1.21		sen-	Os06g0319800
BRADI_1g74060v3	-0.78		sen-	Os03g0165300
BRADI_1g74120v3	-0.84		sen-	Os03g0165000
BRADI_1g74150v3	0.8		sen+	Os03g0164700
BRADI_1g74185v3	-0.68		sen-	Os03g0162900
BRADI_1g74270v3	0.8		sen+	Os03g0162500
BRADI_1g74320v3	1.84		sen+	Os11g0708100
BRADI_1g74330v3	1.49		sen+	Os11g0707900
BRADI_1g74350v3	-0.7		sen-	Os03g0161900
BRADI_1g74430v3	2.13		sen+	Os03g0161100
BRADI_1g74540v3	1.51		sen+	Os03g0159100
BRADI_1g74560v3	0.69		sen+	Os03g0158500
BRADI_1g74570v3	-1.87		sen-	Os03g0158300
BRADI_1g74620v3	-2.6	2.01	sen-/tol+	Os03g0157600
BRADI_1g74640v3	0.84		sen+	Os03g0157400
BRADI_1g74730v3	0.92		sen+
BRADI_1g74760v3	-1.17		sen-	Os03g0155000
BRADI_1g74790v3	1.27		sen+	Os03g0153100
BRADI_1g74827v3	-0.83		sen-	Os03g0152900
BRADI_1g74850v3	-0.84		sen-	Os03g0152700
BRADI_1g74862v3	-2.69		sen-	Os03g0152600
BRADI_1g74870v3	-1.01		sen-	Os03g0152400
BRADI_1g74900v3	-0.81		sen-	Os03g0152000
BRADI_1g74930v3	1.48		sen+	Os05g0553700
BRADI_1g74940v3	1.08		sen+	Os03g0151700
BRADI_1g74997v3	-0.83		sen-	Os03g0151400
BRADI_1g75050v3	-1.21		sen-
BRADI_1g75080v3	0.92		sen+	Os03g0149400
BRADI_1g75087v3	-1.57		sen-	Os03g0149300
BRADI_1g75100v3	0.52		sen+	Os03g0149200
BRADI_1g75170v3	-0.81		sen-	Os10g0447100
BRADI_1g75200v3	2.44		sen+	Os03g0147900
BRADI_1g75210v3	0.8		sen+	Os03g0147700
BRADI_1g75220v3	-1.89		sen-	Os03g0147400
BRADI_1g75262v3	-1.46		sen-	Os03g0146500
BRADI_1g75270v3	1.68		sen+	Os03g0146400
BRADI_1g75290v3	-1.9		sen-	Os03g0146100
BRADI_1g75390v3	0.85		sen+	Os03g0145500
BRADI_1g75450v3	1.87		sen+	Os03g0144800
BRADI_1g75507v3	-0.73		sen-	Os03g0143600
BRADI_1g75560v3	0.74		sen+
BRADI_1g75580v3	-1		sen-	Os03g0142900
BRADI_1g75590v3	1.71		sen+	Os03g0142800
BRADI_1g75610v3	2.67		sen+	Os03g0141200
BRADI_1g75660v3	0.95		sen+
BRADI_1g75730v3	2.6		sen+	Os03g0140200
BRADI_1g75740v3	1.72		sen+	Os03g0139600
BRADI_1g75750v3	0.66		sen+
BRADI_1g75760v3	-2.08		sen-	Os03g0139500
BRADI_1g75770v3	-0.86		sen-	Os03g0139400
BRADI_1g75790v3	1.21		sen+	Os10g0466700
BRADI_1g75795v3	1.22		sen+
BRADI_1g75820v3	-1.33		sen-	Os03g0138700
BRADI_1g75900v3		3.26	tol+	Os03g0137600
BRADI_1g75950v3	-2.93		sen-	Os04g0356600
BRADI_1g75980v3	-1.03		sen-
BRADI_1g76040v3	-0.67		sen-	Os03g0135600
BRADI_1g76110v3	-3.64		sen-	Os03g0134500
BRADI_1g76130v3	-0.69		sen-	Os03g0134300
BRADI_1g76140v3	-1.86		sen-	Os03g0133900
BRADI_1g76200v3	7.38		sen+	Os03g0133100
BRADI_1g76227v3	0.72		sen+	Os03g0132800
BRADI_1g76270v3	1.65		sen+	Os03g0132200
BRADI_1g76290v3	-2.26	0.56	sen-/tol+	Os03g0131900
BRADI_1g76300v3	-0.6		sen-	Os03g0131500
BRADI_1g76307v3	0.98		sen+	Os03g0131400
BRADI_1g76314v3	-0.56		sen-	Os03g0131300
BRADI_1g76330v3	-1.12		sen-	Os03g0131200
BRADI_1g76350v3	1.58		sen+
BRADI_1g76380v3	0.68		sen+	Os03g0130750
BRADI_1g76420v3	-1.35		sen-	Os03g0130300
BRADI_1g76470v3	-2.61	0.51	sen-/tol+	Os03g0129300
BRADI_1g76490v3	5.84		sen+
BRADI_1g76500v3	-3.08		sen-	Os06g0486300
BRADI_1g76520v3	0.57		sen+	Os05g0301500
BRADI_1g76550v3	-1.56		sen-	Os03g0128800
BRADI_1g76570v3	-2.36		sen-	Os07g0153600
BRADI_1g76600v3	-0.97		sen-	Os03g0128400
BRADI_1g76610v3	3.51		sen+	Os03g0128300
BRADI_1g76700v3	1.12		sen+	Os01g0375000
BRADI_1g76707v3	-0.97		sen-	Os01g0375100
BRADI_1g76787v3	-1.87	0.7	sen-/tol+	Os03g0126300
BRADI_1g76870v3	-1.35		sen-	Os10g0533500
BRADI_1g76880v3	-1.46		sen-	Os03g0125000
BRADI_1g76890v3	2.21		sen+	Os03g0124900
BRADI_1g76920v3	-1.58		sen-	Os03g0124200
BRADI_1g76970v3	1.23		sen+	Os03g0123500
BRADI_1g77010v3	-0.66		sen-	Os03g0123100
BRADI_1g77047v3	-2.21	0.57	sen-/tol+	Os08g0347500
BRADI_1g77060v3	-1.68		sen-	Os03g0122200
BRADI_1g77075v3	-6.82		sen-
BRADI_1g77080v3	-1		sen-	Os03g0122000
BRADI_1g77100v3	-1.31		sen-	Os07g0407300
BRADI_1g77170v3	4.35		sen+	Os03g0120400
BRADI_1g77260v3	3.64		sen+	Os03g0119300
BRADI_1g77290v3	-1.2		sen-	Os03g0118800
BRADI_1g77330v3	-1.53		sen-	Os03g0118200
BRADI_1g77370v3	-0.76		sen-	Os04g0177400
BRADI_1g77380v3	-1.03		sen-	Os03g0117100
BRADI_1g77390v3	-1.45		sen-	Os03g0116900
BRADI_1g77400v3	-1.92	0.74	sen-/tol+	Os03g0117000
BRADI_1g77430v3	-0.87		sen-	Os03g0116700
BRADI_1g77450v3	1.24		sen+	Os03g0116400
BRADI_1g77460v3	0.98		sen+	Os03g0116300
BRADI_1g77470v3	0.97		sen+	Os03g0116000
BRADI_1g77530v3	-1.45		sen-	Os03g0115300
BRADI_1g77560v3	1.4		sen+	Os03g0115000
BRADI_1g77580v3	0.65		sen+	Os03g0114800
[truncated: 4,761 more rows]

## Sheet: H. vulgare
gene ID	logFC.sen	logFC.tol	Class	Rice ortholog
ENSRNA049460353		1.57	tol+
ENSRNA049467767		3.12	tol+
ENSRNA049467786		3.38	tol+
ENSRNA049471275		3.22	tol+
ENSRNA049476428		1.71	tol+
ENSRNA049478795		4.65	tol+
ENSRNA049480163		3.77	tol+
ENSRNA049481980		3.21	tol+
ENSRNA049482232		5.19	tol+
ENSRNA049482248		7.41	tol+
ENSRNA049482271		4.04	tol+
ENSRNA049483705		4.17	tol+
ENSRNA049485904		4.35	tol+
ENSRNA049485909		6.59	tol+
ENSRNA049485910		8.84	tol+
ENSRNA049485925		9.9	tol+
ENSRNA049486314		3.41	tol+
ENSRNA049486338		3.01	tol+
ENSRNA049486472		3.56	tol+
ENSRNA049486870		3.33	tol+
ENSRNA049486928	1.59	1.56
ENSRNA049486929	1.41		sen+
ENSRNA049486932		1.37	tol+
ENSRNA049488557		3.74	tol+
ENSRNA049488884		5.68	tol+
ENSRNA049489028		3.97	tol+
ENSRNA049489213		5.05	tol+
ENSRNA049489216		3.81	tol+
ENSRNA049489319		5.29	tol+
ENSRNA049489322		3	tol+
ENSRNA049489336		4.15	tol+
ENSRNA049489352	-1.33	4.27	sen-/tol+
ENSRNA049489445		3.51	tol+
ENSRNA050015196		4.98	tol+
ENSRNA050016826		4.97	tol+
ENSRNA050016828		4.6	tol+
ENSRNA050016834		6.17	tol+
ENSRNA050016836		5.11	tol+
EPlHVUG00000039843		5.89	tol+
EPlHVUG00000039931		4.87	tol+
HORVU0Hr1G000510		-0.84	tol-	Os05g0388600
HORVU0Hr1G000760		2.95	tol+
HORVU0Hr1G001430		-2.37	tol-	Os05g0537100
HORVU0Hr1G002720	2.74		sen+	Os08g0448000
HORVU0Hr1G002950		-1.2	tol-	Os07g0612400
HORVU0Hr1G003270		-0.92	tol-	Os07g0544800
HORVU0Hr1G003850		-0.96	tol-	Os04g0385900
HORVU0Hr1G003890		-1.08	tol-	Os07g0509800
HORVU0Hr1G003900		1.48	tol+
HORVU0Hr1G004830		-0.68	tol-	Os04g0459500
HORVU0Hr1G005160		-2.31	tol-	Os04g0516600
HORVU0Hr1G005300		-2.68	tol-	Os04g0581000
HORVU0Hr1G006830		1.04	tol+
HORVU0Hr1G007340	4.6	-4.75	sen+/tol-	Os03g0436400
HORVU0Hr1G007360	-1.08		sen-	Os10g0567400
HORVU0Hr1G007620	-1.04		sen-
HORVU0Hr1G008650		-1.68	tol-
HORVU0Hr1G008990		1.02	tol+	Os03g0208600
HORVU0Hr1G010080		1.96	tol+	Os01g0314600
HORVU0Hr1G010880	4.7		sen+
HORVU0Hr1G011140		4.82	tol+
HORVU0Hr1G011720	3.42		sen+
HORVU0Hr1G011940	0.91		sen+
HORVU0Hr1G012140	1.89		sen+	Os09g0131200
HORVU0Hr1G012860		-0.82	tol-	Os09g0400000
HORVU0Hr1G012920		-2.13	tol-	Os09g0400500
HORVU0Hr1G012930	3.16		sen+
HORVU0Hr1G012940		-2.29	tol-	Os09g0400400
HORVU0Hr1G015230		-1.05	tol-	Os12g0209901
HORVU0Hr1G015530		-0.6	tol-	Os02g0165100
HORVU0Hr1G015810		0.97	tol+	Os02g0229600
HORVU0Hr1G015950		0.91	tol+	Os02g0621800
HORVU0Hr1G016310		-3.53	tol-
HORVU0Hr1G016330		-0.87	tol-	Os02g0626400
HORVU0Hr1G016860	-1.39	-1.04		Os02g0704300
HORVU0Hr1G017790	-2.1		sen-	Os08g0373000
HORVU0Hr1G017830		1.53	tol+
HORVU0Hr1G018830	2.18	2.25		Os04g0665400
HORVU0Hr1G019300		-3.43	tol-
HORVU0Hr1G019590		2.67	tol+	Os06g0177700
HORVU0Hr1G019800	1.01	0.85
HORVU0Hr1G019870		3.74	tol+
HORVU0Hr1G020630		-2.4	tol-	Os06g0311800
HORVU0Hr1G021640		-0.65	tol-	Os06g0591600
HORVU0Hr1G021860		-1.03	tol-
HORVU0Hr1G021880		-3.81	tol-	Os06g0714500
HORVU0Hr1G021940		-0.63	tol-	Os02g0259100
HORVU0Hr1G021950		-0.53	tol-	Os06g0607000
HORVU0Hr1G022030		-1.26	tol-	Os06g0618700
HORVU0Hr1G022070	3.22		sen+
HORVU0Hr1G022290		-2.33	tol-	Os09g0341100
HORVU0Hr1G022340	1.47		sen+
HORVU0Hr1G022820		-2.85	tol-
HORVU0Hr1G023200		-1.25	tol-	Os02g0681632
HORVU0Hr1G023910		3.44	tol+
HORVU0Hr1G024070	-2.82		sen-
HORVU0Hr1G024790		3.9	tol+
HORVU0Hr1G024880		3.63	tol+
HORVU0Hr1G025120		4.65	tol+
HORVU0Hr1G029350		3.43	tol+
HORVU0Hr1G030830		-1.86	tol-	Os05g0322900
HORVU0Hr1G031330		4.09	tol+
HORVU0Hr1G031700		-1.39	tol-	Os01g0591300
HORVU0Hr1G031970	-2.63		sen-	Os01g0971100
HORVU0Hr1G032640		3.73	tol+
HORVU0Hr1G035530		3.91	tol+
HORVU0Hr1G037420	-1.01		sen-
HORVU0Hr1G038250	-1.45		sen-	Os12g0156000
HORVU0Hr1G038330		0.9	tol+
HORVU0Hr1G038350		-0.89	tol-	Os04g0492400
HORVU0Hr1G039020		-3.16	tol-
HORVU0Hr1G039090		-1.59	tol-	Os11g0595200
HORVU0Hr1G039280		-1.09	tol-
HORVU0Hr1G039890		-1.49	tol-	Os01g0117266
HORVU0Hr1G039970	2.17	-2.16	sen+/tol-	Os06g0667000
HORVU1Hr1G000010		0.58	tol+	Os05g0145000
HORVU1Hr1G000110		0.7	tol+	Os02g0291500
HORVU1Hr1G000320	3.95		sen+
HORVU1Hr1G000520	1.48	1.15		Os05g0102600
HORVU1Hr1G000560		-2.49	tol-
HORVU1Hr1G001220		-2.88	tol-
HORVU1Hr1G001660		-0.89	tol-
HORVU1Hr1G001770		-1.8	tol-	Os05g0166600
HORVU1Hr1G002100	-2.29		sen-
HORVU1Hr1G002150	-1.09		sen-	Os05g0105000
HORVU1Hr1G002410		4.3	tol+	Os05g0104150
HORVU1Hr1G002460		-1.4	tol-
HORVU1Hr1G002600		-1.34	tol-	Os01g0117300
HORVU1Hr1G003170		-0.49	tol-	Os08g0337700
HORVU1Hr1G003230	-2.21		sen-	Os07g0180700
HORVU1Hr1G004080		-0.64	tol-
HORVU1Hr1G004150		4.11	tol+
HORVU1Hr1G004200	1.03		sen+	Os05g0109600
HORVU1Hr1G004230	-0.97	-0.75		Os05g0594700
HORVU1Hr1G004330		-0.91	tol-	Os05g0110000
HORVU1Hr1G004400		-0.89	tol-
HORVU1Hr1G005180		-2.47	tol-	Os04g0375300
HORVU1Hr1G005800		-0.92	tol-	Os05g0113300
HORVU1Hr1G006940		0.84	tol+	Os06g0524700
HORVU1Hr1G007010		1.06	tol+
HORVU1Hr1G007800	5.25	9.19	ΔLFC>1	Os10g0430200
HORVU1Hr1G007810	2.34	1.53
HORVU1Hr1G008120		0.67	tol+	Os05g0116100
HORVU1Hr1G008360	9.51		sen+	Os12g0258700
HORVU1Hr1G008620		-0.49	tol-	Os02g0324300
HORVU1Hr1G009490		-5.9	tol-	Os07g0175600
HORVU1Hr1G010120	5		sen+
HORVU1Hr1G010810	-1.12		sen-	Os05g0117798
HORVU1Hr1G011990		2.75	tol+
HORVU1Hr1G012730	0.92	1.04		Os08g0243100
HORVU1Hr1G013450		1.24	tol+
HORVU1Hr1G013490		0.69	tol+
HORVU1Hr1G014010	1.16	1.38		Os07g0203300
HORVU1Hr1G015260		1.89	tol+	Os03g0859900
HORVU1Hr1G015820	0.86		sen+
HORVU1Hr1G015940	-0.68		sen-	Os05g0131100
HORVU1Hr1G016980		0.99	tol+	Os05g0135500
HORVU1Hr1G017050		-0.71	tol-	Os01g0370600
HORVU1Hr1G017570		0.69	tol+	Os05g0137400
HORVU1Hr1G017700		-0.88	tol-
HORVU1Hr1G018360		1.95	tol+	Os05g0142100
HORVU1Hr1G018370		1.44	tol+
HORVU1Hr1G018720	-0.94		sen-	Os05g0143300
HORVU1Hr1G020590		1.2	tol+	Os12g0506700
HORVU1Hr1G021140	2.43	-2.81	sen+/tol-
HORVU1Hr1G021150		-3.97	tol-
HORVU1Hr1G021160		-1.94	tol-	Os05g0148900
HORVU1Hr1G021680	2.37	3.38	ΔLFC>1
HORVU1Hr1G022570	0.82		sen+	Os05g0155100
HORVU1Hr1G022840	-1.69	-1.61		Os03g0583800
HORVU1Hr1G023160		-1.73	tol-	Os04g0223901
HORVU1Hr1G024870		-1.78	tol-	Os03g0603600
HORVU1Hr1G025440		1.2	tol+	Os05g0171200
HORVU1Hr1G025530		3.18	tol+	Os05g0171900
HORVU1Hr1G025830		-1.72	tol-	Os05g0177500
HORVU1Hr1G025870		1.72	tol+	Os05g0177500
HORVU1Hr1G026520		-1.64	tol-	Os05g0179300
HORVU1Hr1G026920		3.19	tol+
HORVU1Hr1G027000		3.5	tol+
HORVU1Hr1G028030		-0.94	tol-	Os05g0186300
HORVU1Hr1G028680		-0.5	tol-	Os05g0200100
HORVU1Hr1G029460	1.3		sen+	Os05g0210100
HORVU1Hr1G035100	0.84		sen+
HORVU1Hr1G035720		-1.05	tol-	Os12g0291200
HORVU1Hr1G037760	0.94	1
HORVU1Hr1G038180	1.1	1.57		Os10g0456900
HORVU1Hr1G038330		-0.8	tol-	Os10g0457600
HORVU1Hr1G038680	1.31		sen+	Os10g0462900
HORVU1Hr1G039150		1.36	tol+
HORVU1Hr1G039600		-0.59	tol-	Os10g0469700
HORVU1Hr1G039820		-2.33	tol-	Os10g0471100
HORVU1Hr1G041740		-0.73	tol-	Os10g0479800
HORVU1Hr1G041820		-0.83	tol-	Os10g0480500
HORVU1Hr1G043520	1.04		sen+	Os10g0495600
HORVU1Hr1G043900		-1.13	tol-	Os10g0492101
HORVU1Hr1G043910		-2.58	tol-	Os10g0491000
HORVU1Hr1G044740		-0.91	tol-	Os10g0498500
HORVU1Hr1G044770	-3.49	-3.04
HORVU1Hr1G044960		-1.26	tol-	Os10g0499400
HORVU1Hr1G045690		-2.53	tol-
HORVU1Hr1G045700		-1.52	tol-
HORVU1Hr1G046560		1.3	tol+	Os10g0506000
HORVU1Hr1G046620		0.69	tol+	Os10g0506800
HORVU1Hr1G047000		-1.22	tol-	Os10g0516400
HORVU1Hr1G047030		-1.16	tol-	Os10g0514300
HORVU1Hr1G047220		-1.28	tol-	Os10g0512400
HORVU1Hr1G047440		-0.79	tol-	Os10g0510000
HORVU1Hr1G048580		-0.67	tol-	Os10g0521700
HORVU1Hr1G048630		-1.08	tol-
HORVU1Hr1G048860		-1.15	tol-	Os10g0523700
HORVU1Hr1G049210		-3.47	tol-
HORVU1Hr1G049260		-2.82	tol-	Os10g0530500
HORVU1Hr1G049270	2.04	-2.83	sen+/tol-	Os10g0530500
HORVU1Hr1G049280		-4.99	tol-	Os10g0530900
HORVU1Hr1G049420	-1.54	-1.65		Os10g0532300
HORVU1Hr1G049500		-0.82	tol-	Os10g0533600
HORVU1Hr1G050130		-1.4	tol-	Os10g0573700
HORVU1Hr1G050640		-0.79	tol-	Os10g0575700
HORVU1Hr1G051160		-1.35	tol-	Os10g0578800
HORVU1Hr1G051200		-0.97	tol-	Os10g0579100
HORVU1Hr1G051210		0.9	tol+
HORVU1Hr1G051580		-2.52	tol-
HORVU1Hr1G052040	-1.12	-0.67		Os10g0539900
HORVU1Hr1G052430		-2.97	tol-	Os10g0543400
HORVU1Hr1G052850		-1.43	tol-	Os01g0303600
HORVU1Hr1G053070	1.61		sen+	Os02g0829500
HORVU1Hr1G053260		-2.37	tol-	Os10g0548850
HORVU1Hr1G053440		-0.94	tol-	Os10g0550900
HORVU1Hr1G053930		0.67	tol+	Os10g0554100
HORVU1Hr1G054020		-0.94	tol-	Os10g0554200
HORVU1Hr1G054100		-1.84	tol-	Os10g0555100
HORVU1Hr1G054200		-3	tol-	Os10g0555600
HORVU1Hr1G054380		-0.53	tol-	Os10g0571200
HORVU1Hr1G054390		-0.82	tol-	Os05g0304600
HORVU1Hr1G055140		-1.52	tol-
HORVU1Hr1G055340		1.01	tol+	Os10g0564500
HORVU1Hr1G055710		-1.72	tol-
HORVU1Hr1G056210		-0.96	tol-	Os10g0559500
HORVU1Hr1G056500		0.59	tol+	Os05g0389000
HORVU1Hr1G056560		0.79	tol+	Os05g0388400
HORVU1Hr1G056570		2.71	tol+	Os05g0542500
HORVU1Hr1G057080		1.41	tol+	Os07g0685900
HORVU1Hr1G057510		1.06	tol+	Os02g0723600
HORVU1Hr1G057680		-2	tol-	Os05g0375400
HORVU1Hr1G057860		1.18	tol+	Os05g0374200
HORVU1Hr1G057880	3.25	1.82	ΔLFC<-1	Os05g0373900
HORVU1Hr1G058000		-0.61	tol-	Os05g0373300
HORVU1Hr1G058540	1.21		sen+	Os05g0366300
HORVU1Hr1G058560		1.27	tol+	Os05g0365200
HORVU1Hr1G058790		0.92	tol+	Os05g0363500
HORVU1Hr1G059130		-1.12	tol-	Os05g0358500
HORVU1Hr1G059140		-0.62	tol-	Os05g0358500
HORVU1Hr1G060960	-1.1	-0.97		Os05g0406100
HORVU1Hr1G061160	-0.93	-0.76		Os05g0405000
HORVU1Hr1G062080		-1.21	tol-	Os05g0399100
HORVU1Hr1G062250		-0.97	tol-	Os07g0503500
HORVU1Hr1G062690		1.36	tol+	Os05g0393700
HORVU1Hr1G063390		-3.03	tol-	Os12g0639400
HORVU1Hr1G063410	0.83		sen+	Os03g0567600
HORVU1Hr1G063560		-0.81	tol-
HORVU1Hr1G063610		-1.29	tol-	Os05g0423500
HORVU1Hr1G063740	3.04		sen+
HORVU1Hr1G063940		-0.96	tol-
HORVU1Hr1G064300		-1.09	tol-	Os05g0418800
HORVU1Hr1G064600	0.91		sen+	Os05g0417100
HORVU1Hr1G064780		-1.19	tol-	Os05g0414700
HORVU1Hr1G065150	5.71	-2.73	sen+/tol-
HORVU1Hr1G065470	1		sen+	Os05g0427100
HORVU1Hr1G065820	1.3		sen+	Os10g0134700
HORVU1Hr1G065830	1.12		sen+	Os05g0502800
HORVU1Hr1G066100	1.78		sen+	Os05g0501700
HORVU1Hr1G066240		-0.58	tol-	Os05g0501300
HORVU1Hr1G066530		-0.91	tol-	Os05g0500500
HORVU1Hr1G067020		-0.96	tol-	Os05g0497675
HORVU1Hr1G067100		0.87	tol+	Os03g0840500
HORVU1Hr1G067530		0.76	tol+
HORVU1Hr1G067550		-1.66	tol-	Os05g0495600
HORVU1Hr1G068020		-1.17	tol-	Os01g0591300
HORVU1Hr1G068200		-1.98	tol-	Os05g0492200
HORVU1Hr1G068500		-0.64	tol-	Os05g0490900
HORVU1Hr1G069180		-0.61	tol-	Os05g0484800
HORVU1Hr1G069440		4.49	tol+	Os05g0481000
HORVU1Hr1G069800		-1.27	tol-	Os05g0477900
HORVU1Hr1G069840		1.03	tol+
HORVU1Hr1G070190	-1.5	-1.17
HORVU1Hr1G070220	2.91		sen+	Os05g0475400
HORVU1Hr1G070250		-3.22	tol-	Os05g0474800
HORVU1Hr1G070290		-0.64	tol-	Os02g0556800
HORVU1Hr1G070390		-0.59	tol-	Os05g0473500
HORVU1Hr1G070450		-1.02	tol-	Os05g0472400
HORVU1Hr1G070460		-0.93	tol-	Os05g0472700
HORVU1Hr1G070580		-0.84	tol-	Os05g0471000
HORVU1Hr1G070640		-1.66	tol-	Os05g0468900
HORVU1Hr1G071260		-0.95	tol-	Os02g0306401
HORVU1Hr1G071330		-0.75	tol-	Os05g0586300
HORVU1Hr1G071430	-1.51	-1.02
HORVU1Hr1G071500		-3.32	tol-
HORVU1Hr1G071620	1.19	0.85		Os05g0463800
HORVU1Hr1G071910	-1.2		sen-	Os05g0462000
HORVU1Hr1G072780	1.23		sen+	Os05g0455500
HORVU1Hr1G072890	-1.52	-1.92		Os05g0454500
HORVU1Hr1G072910		-1.75	tol-	Os05g0454200
HORVU1Hr1G073010		-0.7	tol-	Os05g0453300
HORVU1Hr1G073150	1.06		sen+	Os05g0451900
HORVU1Hr1G073460		-0.94	tol-	Os05g0447700
HORVU1Hr1G073540		1.04	tol+	Os05g0445900
HORVU1Hr1G074180		-1.41	tol-	Os05g0439400
HORVU1Hr1G074260		-0.9	tol-	Os05g0429900
HORVU1Hr1G074310		-3.88	tol-	Os05g0493100
HORVU1Hr1G074330		-0.76	tol-
HORVU1Hr1G074590		0.47	tol+	Os01g0871300
HORVU1Hr1G075120		-0.78	tol-	Os05g0429500
HORVU1Hr1G075160		-1.83	tol-	Os01g0106400
HORVU1Hr1G075270		0.79	tol+	Os05g0506200
HORVU1Hr1G075670	2.05	-1.76	sen+/tol-	Os05g0522600
HORVU1Hr1G075830	-2.68	-2.95
HORVU1Hr1G077470	-0.6		sen-	Os10g0486600
HORVU1Hr1G077760	-1.17	-1.5		Os05g0510100
HORVU1Hr1G077820	-0.61		sen-	Os02g0530600
HORVU1Hr1G078030	1.04		sen+	Os05g0509300
HORVU1Hr1G078140		-0.81	tol-
HORVU1Hr1G078160		-0.72	tol-	Os05g0508800
HORVU1Hr1G078370	0.82		sen+	Os01g0271200
HORVU1Hr1G078380	-2.72		sen-	Os01g0600900
HORVU1Hr1G079130	2.47		sen+	Os05g0542900
HORVU1Hr1G079150		-2.14	tol-	Os10g0524400
HORVU1Hr1G079270	-0.82	-0.84
HORVU1Hr1G080070	1.21	1.33		Os01g0888500
HORVU1Hr1G080080		1.63	tol+	Os09g0555150
HORVU1Hr1G080320	0.69	1.23		Os05g0536400
HORVU1Hr1G080330		-0.84	tol-	Os05g0536900
HORVU1Hr1G080360		0.5	tol+	Os05g0535900
HORVU1Hr1G080520		-0.81	tol-	Os05g0535400
HORVU1Hr1G080600		-1.58	tol-	Os01g0669100
HORVU1Hr1G080680	3.79		sen+	Os11g0483000
HORVU1Hr1G081030		0.73	tol+	Os04g0683100
HORVU1Hr1G081300		-3.04	tol-	Os05g0530400
HORVU1Hr1G081410	5.79		sen+	Os05g0529700
HORVU1Hr1G081490	1.24	1.5		Os05g0529400
HORVU1Hr1G081550		-0.65	tol-	Os08g0434300
HORVU1Hr1G081950		-1.48	tol-	Os05g0528000
HORVU1Hr1G082120		1.25	tol+
HORVU1Hr1G082220		2.16	tol+
HORVU1Hr1G082660	1.59		sen+	Os05g0549700
HORVU1Hr1G082670		-3.17	tol-	Os05g0549800
HORVU1Hr1G083100		1.23	tol+	Os02g0262600
HORVU1Hr1G083160	2.28	1.98		Os05g0550300
HORVU1Hr1G083520		2.01	tol+	Os05g0552100
HORVU1Hr1G083960	0.94		sen+	Os07g0661800
HORVU1Hr1G084190		1.48	tol+	Os05g0554000
HORVU1Hr1G084350		0.91	tol+	Os05g0554500
HORVU1Hr1G084560		-0.8	tol-
HORVU1Hr1G084690	1.33		sen+	Os05g0556900
HORVU1Hr1G084720		-3.06	tol-	Os05g0555700
HORVU1Hr1G085240		-2.83	tol-	Os02g0327500
HORVU1Hr1G085720	2.64	-2.8	sen+/tol-
HORVU1Hr1G086070	-1		sen-	Os05g0559400
HORVU1Hr1G086450		-1.25	tol-	Os08g0364900
HORVU1Hr1G086460	-0.91		sen-
HORVU1Hr1G086870	-0.8		sen-
HORVU1Hr1G086930	-1.09	-1.36		Os05g0561600
HORVU1Hr1G086980		1.14	tol+	Os05g0561500
HORVU1Hr1G088580		-2.08	tol-
HORVU1Hr1G088870	-5.55	-2.15	ΔLFC>1	Os01g0600900
HORVU1Hr1G088880	-4.53		sen-	Os01g0600900
HORVU1Hr1G088920		-4.43	tol-	Os01g0600900
HORVU1Hr1G089180	-2.59	-1.97		Os01g0600900
HORVU1Hr1G089460	-2.76	-2.89
HORVU1Hr1G089470		-2.39	tol-
HORVU1Hr1G089490		-3.51	tol-
HORVU1Hr1G089500		-3.19	tol-
HORVU1Hr1G089510		-6.9	tol-
HORVU1Hr1G089520	10.84		sen+	Os08g0454500
HORVU1Hr1G089550		-2.34	tol-	Os05g0567500
HORVU1Hr1G089570		-3.55	tol-
HORVU1Hr1G089620	8.43		sen+	Os08g0157500
HORVU1Hr1G089730		1.02	tol+	Os05g0568100
HORVU1Hr1G090770		-1.1	tol-	Os12g0169000
HORVU1Hr1G091060		-0.89	tol-	Os02g0275200
HORVU1Hr1G091170		-1.8	tol-
HORVU1Hr1G091460		0.67	tol+	Os05g0579000
HORVU1Hr1G091520	-2.41	-1.23	ΔLFC>1
HORVU1Hr1G091530	-0.88	-1.05
HORVU1Hr1G091540	-1.18	-1.02
HORVU1Hr1G091600		-0.61	tol-	Os05g0580000
HORVU1Hr1G091650		1.61	tol+	Os05g0580500
HORVU1Hr1G091850	-1.89		sen-	Os05g0582000
HORVU1Hr1G091880		-0.72	tol-	Os05g0582300
HORVU1Hr1G092110	0.98		sen+	Os06g0265000
HORVU1Hr1G092250		-3.93	tol-	Os07g0538400
HORVU1Hr1G092290	-1.49	-3.76	ΔLFC<-1	Os07g0539700
HORVU1Hr1G092300	-1.91	-4.29	ΔLFC<-1
HORVU1Hr1G092310		-4.6	tol-	Os07g0539300
HORVU1Hr1G092440	-0.98		sen-	Os05g0584600
HORVU1Hr1G092650		-4.26	tol-	Os01g0734800
HORVU1Hr1G093480	2.33		sen+	Os07g0182100
HORVU1Hr1G093560		5.7	tol+	Os09g0537700
HORVU1Hr1G093660		5.56	tol+	Os09g0537700
HORVU1Hr1G093670		5.65	tol+	Os09g0537700
HORVU1Hr1G093780		5.73	tol+	Os09g0537700
HORVU1Hr1G093890		-1	tol-	Os01g0248300
HORVU1Hr1G094180	-0.9	-1.35		Os05g0590300
HORVU1Hr1G094250		-1.95	tol-
HORVU1Hr1G094880		-8.12	tol-	Os10g0320100
HORVU1Hr1G095080	0.76		sen+	Os10g0104500
HORVU1Hr1G095170		0.97	tol+
HORVU1Hr1G095230		0.82	tol+	Os11g0572900
HORVU2Hr1G000050		-2.19	tol-
HORVU2Hr1G000090	6.7	2.75	ΔLFC<-1
HORVU2Hr1G000280		-0.74	tol-	Os04g0165700
HORVU2Hr1G000420		-4.89	tol-
HORVU2Hr1G001150		1.79	tol+	Os03g0140200
HORVU2Hr1G001620		-1.95	tol-
HORVU2Hr1G002600		1.43	tol+	Os04g0136700
HORVU2Hr1G002840		-4.75	tol-	Os10g0129732
HORVU2Hr1G003830		-1.34	tol-
HORVU2Hr1G004550	3.23		sen+
HORVU2Hr1G004620	3.97		sen+
HORVU2Hr1G006830	-0.9	-2.56	ΔLFC<-1
HORVU2Hr1G006850		-1.8	tol-
HORVU2Hr1G007070		-1.09	tol-	Os07g0474600
HORVU2Hr1G007570		-1.76	tol-
HORVU2Hr1G007760		-0.75	tol-
HORVU2Hr1G007980	-0.79		sen-	Os02g0491400
HORVU2Hr1G008090	-4.99		sen-
HORVU2Hr1G008390		-1.24	tol-	Os04g0202300
HORVU2Hr1G008980		-0.88	tol-	Os04g0204000
HORVU2Hr1G009800		-1.23	tol-
HORVU2Hr1G010490		-1.16	tol-	Os04g0226340
HORVU2Hr1G010500		1.41	tol+
HORVU2Hr1G010560		-1.61	tol-	Os04g0227500
HORVU2Hr1G010610		-1.03	tol-
HORVU2Hr1G010670		-2.06	tol-	Os12g0291200
HORVU2Hr1G010690		-1.34	tol-	Os12g0291200
HORVU2Hr1G012460		-7.26	tol-
HORVU2Hr1G012980		-3.13	tol-	Os02g0184700
HORVU2Hr1G013170		-0.81	tol-	Os07g0695800
HORVU2Hr1G013500		-1.26	tol-	Os07g0694600
HORVU2Hr1G013870		-0.88	tol-	Os07g0693800
HORVU2Hr1G014130		0.68	tol+	Os07g0693500
HORVU2Hr1G014450		-0.54	tol-	Os07g0693000
HORVU2Hr1G014710		-1.06	tol-
HORVU2Hr1G014890		-1.11	tol-
HORVU2Hr1G014900		-2.59	tol-
HORVU2Hr1G014930		-1.74	tol-
HORVU2Hr1G015340		0.63	tol+	Os10g0410750
HORVU2Hr1G015360		-1.23	tol-
HORVU2Hr1G015940		-0.7	tol-
HORVU2Hr1G016990	0.78		sen+	Os07g0686400
HORVU2Hr1G017080		-1.38	tol-	Os07g0685500
HORVU2Hr1G017370	5.12		sen+	Os07g0684800
HORVU2Hr1G017740		-3.22	tol-	Os07g0680400
HORVU2Hr1G017880		1.26	tol+	Os07g0679300
HORVU2Hr1G017900		1.66	tol+	Os07g0679300
HORVU2Hr1G017960	-0.8		sen-	Os01g0356500
HORVU2Hr1G018820	1.14		sen+	Os07g0674700
HORVU2Hr1G019520		2.67	tol+
HORVU2Hr1G020180		2.44	tol+
HORVU2Hr1G020190		0.82	tol+
HORVU2Hr1G020690	1.05		sen+
HORVU2Hr1G021270		-1.49	tol-
HORVU2Hr1G021950		0.99	tol+
HORVU2Hr1G022140	1.21		sen+	Os07g0661800
HORVU2Hr1G022560		0.93	tol+	Os11g0155600
HORVU2Hr1G022720		1.33	tol+	Os07g0659500
HORVU2Hr1G022800		-4.43	tol-	Os07g0659300
HORVU2Hr1G022960		-1.39	tol-	Os10g0343200
HORVU2Hr1G023480	-0.83		sen-	Os07g0656700
HORVU2Hr1G024120		0.74	tol+	Os04g0341500
HORVU2Hr1G024160		-2.67	tol-	Os05g0316200
HORVU2Hr1G024460		-3.58	tol-
HORVU2Hr1G024480		-1.82	tol-
HORVU2Hr1G025090		1.16	tol+	Os07g0645500
HORVU2Hr1G025750	1.38		sen+	Os07g0642400
HORVU2Hr1G025770		1.17	tol+	Os05g0572900
HORVU2Hr1G025940		-3.25	tol-	Os07g0641600
HORVU2Hr1G026200	1.23		sen+	Os07g0640000
HORVU2Hr1G026820	4.27		sen+
HORVU2Hr1G026840	3.9		sen+	Os07g0638100
HORVU2Hr1G027040	-0.87		sen-	Os07g0637300
HORVU2Hr1G027370	1.32		sen+	Os03g0370500
HORVU2Hr1G027400	1.28	1.2		Os03g0370500
HORVU2Hr1G027470		-0.74	tol-	Os07g0635300
HORVU2Hr1G027480	7.36	-7.08	sen+/tol-	Os07g0635300
HORVU2Hr1G028060		0.89	tol+	Os11g0176200
HORVU2Hr1G028230	-0.83	-1.16		Os07g0632800
HORVU2Hr1G028330		-2.3	tol-	Os07g0631700
HORVU2Hr1G028430	2.16		sen+	Os07g0630400
HORVU2Hr1G028580		-2.64	tol-	Os01g0697100
HORVU2Hr1G028670	7.61		sen+	Os01g0615100
HORVU2Hr1G029900		-1.04	tol-	Os07g0622000
HORVU2Hr1G030520		1.57	tol+	Os07g0619800
HORVU2Hr1G030880	0.78		sen+
HORVU2Hr1G030950		0.67	tol+	Os07g0616200
HORVU2Hr1G031390		2.15	tol+	Os07g0615000
HORVU2Hr1G031400		-1.86	tol-
HORVU2Hr1G031410		-2.11	tol-	Os07g0614600
HORVU2Hr1G031940	0.74		sen+	Os07g0608500
HORVU2Hr1G032320		-0.65	tol-
HORVU2Hr1G032360		-1.47	tol-
HORVU2Hr1G032370		-1.06	tol-
HORVU2Hr1G032400		-0.58	tol-
HORVU2Hr1G032710		2.18	tol+	Os07g0603300
HORVU2Hr1G033240		0.74	tol+
HORVU2Hr1G033610	2.42		sen+
HORVU2Hr1G034200		1.12	tol+
HORVU2Hr1G034330		0.81	tol+	Os08g0289400
HORVU2Hr1G034370	1.7		sen+	Os07g0597200
HORVU2Hr1G034420	-1.42		sen-	Os07g0596900
HORVU2Hr1G034440		-0.76	tol-	Os07g0596600
HORVU2Hr1G035060	1.36		sen+	Os07g0590600
HORVU2Hr1G035170		-1.18	tol-	Os07g0588800
HORVU2Hr1G035680		1.65	tol+	Os07g0586800
HORVU2Hr1G036050		-0.53	tol-
HORVU2Hr1G036220		-0.69	tol-	Os12g0420200
HORVU2Hr1G036240		-1.04	tol-	Os07g0584000
HORVU2Hr1G036590		-3.74	tol-	Os07g0582400
HORVU2Hr1G036780		-0.57	tol-	Os07g0581000
HORVU2Hr1G037620		-2	tol-
HORVU2Hr1G039030		-1.02	tol-	Os07g0569100
HORVU2Hr1G039210		3.19	tol+
HORVU2Hr1G039320		3.42	tol+
HORVU2Hr1G039370		3.5	tol+
HORVU2Hr1G039390		3.74	tol+
HORVU2Hr1G039640		3.06	tol+	Os07g0566500
HORVU2Hr1G040130		-5.71	tol-	Os07g0564500
HORVU2Hr1G041080		-2.82	tol-	Os07g0559700
HORVU2Hr1G041280		-0.74	tol-
HORVU2Hr1G041320		-0.57	tol-	Os07g0558200
HORVU2Hr1G041430	-0.84		sen-	Os07g0558000
HORVU2Hr1G041590	-1.57	-0.81		Os07g0557100
HORVU2Hr1G042210		-1.06	tol-	Os07g0553633
HORVU2Hr1G042240		1.96	tol+	Os07g0551600
HORVU2Hr1G042550		-2.35	tol-	Os07g0550500
HORVU2Hr1G043780		-0.63	tol-	Os07g0545800
HORVU2Hr1G043920	-0.73	-0.91
HORVU2Hr1G044270		-1.47	tol-	Os07g0541000
HORVU2Hr1G044510		-1.35	tol-	Os07g0539700
HORVU2Hr1G044520		-4.19	tol-
HORVU2Hr1G044620		6.45	tol+
HORVU2Hr1G044640		-2.33	tol-	Os07g0537000
HORVU2Hr1G044650		-2.2	tol-	Os07g0537000
HORVU2Hr1G044680		-1.96	tol-	Os07g0537000
HORVU2Hr1G044870		-0.8	tol-
HORVU2Hr1G044910		-0.99	tol-	Os07g0534300
HORVU2Hr1G045500	1.8		sen+
HORVU2Hr1G045810		-1.22	tol-	Os07g0522900
HORVU2Hr1G045900		-1.53	tol-	Os07g0523400
HORVU2Hr1G046050		-1.36	tol-	Os07g0524900
HORVU2Hr1G046590		0.96	tol+	Os07g0516000
HORVU2Hr1G048280		-1.2	tol-	Os07g0505200
HORVU2Hr1G049700	-0.63	-0.52		Os07g0204900
HORVU2Hr1G052690		1.05	tol+
HORVU2Hr1G055380		0.53	tol+	Os07g0495900
HORVU2Hr1G056440	1.33		sen+	Os07g0163500
HORVU2Hr1G056770		0.77	tol+	Os01g0234200
HORVU2Hr1G057960	0.76	1.33		Os07g0164900
HORVU2Hr1G058850		-0.76	tol-	Os07g0568300
HORVU2Hr1G058900		0.71	tol+	Os07g0166700
HORVU2Hr1G058940		0.82	tol+	Os07g0164000
HORVU2Hr1G059520		0.83	tol+	Os07g0159700
HORVU2Hr1G059780		1.44	tol+	Os07g0160300
HORVU2Hr1G060350		-0.83	tol-	Os07g0150700
HORVU2Hr1G060460		1.08	tol+
HORVU2Hr1G060480		-0.72	tol-	Os07g0148900
HORVU2Hr1G061870		0.72	tol+
HORVU2Hr1G062700		-0.67	tol-	Os07g0119000
HORVU2Hr1G063620		-2.31	tol-
HORVU2Hr1G063880	0.98		sen+	Os07g0109500
HORVU2Hr1G063900	1.67		sen+
HORVU2Hr1G064150		-2.88	tol-
HORVU2Hr1G064160		-2.7	tol-
HORVU2Hr1G064730	-2.72	-2.19
HORVU2Hr1G065120		-0.97	tol-	Os07g0100200
HORVU2Hr1G065750		-1.48	tol-
HORVU2Hr1G066790	1.15		sen+	Os08g0404000
HORVU2Hr1G066820	-0.65	-0.56		Os04g0321700
HORVU2Hr1G066950		-0.92	tol-	Os04g0346000
HORVU2Hr1G067040		0.91	tol+	Os04g0347800
HORVU2Hr1G067750		0.88	tol+	Os04g0352400
HORVU2Hr1G068090		-0.77	tol-	Os04g0373400
HORVU2Hr1G068350		2.52	tol+
HORVU2Hr1G068630		-1.2	tol-	Os04g0379600
HORVU2Hr1G069600		-0.64	tol-
HORVU2Hr1G069980		0.56	tol+	Os04g0388700
HORVU2Hr1G070140		-1.36	tol-	Os04g0390100
HORVU2Hr1G070160		-2.14	tol-	Os04g0390100
HORVU2Hr1G070720		-1.1	tol-	Os04g0394700
HORVU2Hr1G071240		0.86	tol+	Os02g0517531
HORVU2Hr1G071570		-3.62	tol-	Os04g0401700
HORVU2Hr1G071880		-0.54	tol-	Os04g0403900
HORVU2Hr1G071960	-0.75	-0.66		Os04g0404800
HORVU2Hr1G071980		-0.54	tol-	Os04g0404900
HORVU2Hr1G072210	1.12	-1.12	sen+/tol-
HORVU2Hr1G072870		-1.05	tol-	Os04g0412100
HORVU2Hr1G072890	-0.71	-0.83		Os04g0412300
HORVU2Hr1G073030	-1.66	-2.09
HORVU2Hr1G073370		-1.08	tol-	Os04g0414700
HORVU2Hr1G073920		-0.62	tol-	Os04g0417800
HORVU2Hr1G074130		-1.37	tol-	Os04g0418500
HORVU2Hr1G074770		1.7	tol+
HORVU2Hr1G074940		-1.19	tol-
HORVU2Hr1G074960		-1	tol-	Os04g0429500
HORVU2Hr1G075010		-1.31	tol-	Os04g0429800
HORVU2Hr1G075690		-0.8	tol-	Os04g0432400
HORVU2Hr1G076320	2.87		sen+
HORVU2Hr1G077630		-1.94	tol-
HORVU2Hr1G077650	-1.01	-1.03		Os04g0444800
HORVU2Hr1G077670		-1.12	tol-
HORVU2Hr1G077990	1.81	1.12
HORVU2Hr1G078330		1.28	tol+	Os07g0208900
HORVU2Hr1G078890		-1.22	tol-	Os04g0449500
HORVU2Hr1G078910	0.89		sen+	Os04g0449900
HORVU2Hr1G078960		-2.52	tol-	Os04g0450000
HORVU2Hr1G079170		-1.51	tol-
HORVU2Hr1G079180		2.54	tol+	Os04g0450600
HORVU2Hr1G079200		-0.78	tol-	Os04g0452000
HORVU2Hr1G079510		-1.6	tol-
HORVU2Hr1G079610		1.45	tol+	Os04g0452500
HORVU2Hr1G080020		-0.8	tol-	Os04g0457800
HORVU2Hr1G080050		0.54	tol+	Os04g0458200
HORVU2Hr1G080140	1.88		sen+	Os04g0458600
HORVU2Hr1G080360		1.16	tol+	Os10g0363500
HORVU2Hr1G080370	0.9		sen+
HORVU2Hr1G080890		-0.72	tol-	Os04g0463500
HORVU2Hr1G081360		0.8	tol+	Os04g0466700
HORVU2Hr1G081540		-2.85	tol-	Os04g0468600
HORVU2Hr1G081590		-4.91	tol-
HORVU2Hr1G082170		-1.68	tol-	Os04g0474800
HORVU2Hr1G082660		-1.05	tol-	Os04g0477500
HORVU2Hr1G082700		3.26	tol+	Os04g0339400
HORVU2Hr1G082740		2.59	tol+
HORVU2Hr1G082760	4.04		sen+
HORVU2Hr1G083050		0.87	tol+
HORVU2Hr1G083490	-1.28		sen-
HORVU2Hr1G083560		-1.36	tol-
HORVU2Hr1G083700		2.21	tol+
HORVU2Hr1G084210		-1.84	tol-	Os04g0487200
HORVU2Hr1G084260		-0.77	tol-	Os04g0487200
HORVU2Hr1G084420	-1.31	-1.08		Os02g0509600
HORVU2Hr1G084600	1.12	1.26		Os04g0488500
HORVU2Hr1G084980		1.07	tol+	Os04g0492900
HORVU2Hr1G085000	-0.95	-1.11
HORVU2Hr1G085270	1.92	-3.9	sen+/tol-	Os04g0493400
HORVU2Hr1G085280		-4.07	tol-	Os04g0493400
HORVU2Hr1G085300		-1.08	tol-	Os08g0485900
HORVU2Hr1G085360		1.01	tol+	Os03g0389900
HORVU2Hr1G085650		-0.67	tol-	Os04g0496000
HORVU2Hr1G085830		0.7	tol+	Os04g0497350
HORVU2Hr1G086390	0.83		sen+	Os04g0501000
HORVU2Hr1G086690		-1.2	tol-	Os04g0501500
HORVU2Hr1G087030		-1.27	tol-
HORVU2Hr1G087090		1.53	tol+
HORVU2Hr1G087540		0.66	tol+	Os07g0121200
HORVU2Hr1G087890	-2.03		sen-	Os04g0508000
HORVU2Hr1G088110		-1.19	tol-	Os04g0508800
HORVU2Hr1G088270		1	tol+	Os04g0509300
HORVU2Hr1G088480	0.8		sen+	Os04g0510400
HORVU2Hr1G089050		2.24	tol+	Os04g0513400
HORVU2Hr1G089090	3.01		sen+	Os02g0622300
HORVU2Hr1G089130		-0.86	tol-	Os04g0515400
HORVU2Hr1G089270	1.18		sen+
HORVU2Hr1G089310	1.72		sen+	Os04g0517100
HORVU2Hr1G089440		-2.17	tol-	Os04g0518400
HORVU2Hr1G089940		-1.09	tol-	Os04g0521100
HORVU2Hr1G089970		-1.23	tol-
HORVU2Hr1G090030		2.89	tol+
HORVU2Hr1G090200	2.79		sen+	Os04g0523600
HORVU2Hr1G090280		-2.67	tol-	Os04g0524500
HORVU2Hr1G090310		-1.85	tol-	Os04g0524600
HORVU2Hr1G090490		2.46	tol+	Os04g0525700
HORVU2Hr1G090610	-0.66		sen-	Os04g0525900
HORVU2Hr1G090950		1.69	tol+	Os04g0528400
HORVU2Hr1G090980		0.87	tol+	Os07g0412100
HORVU2Hr1G091190		-2.83	tol-
HORVU2Hr1G091270		1.21	tol+	Os04g0530700
HORVU2Hr1G091800		-0.74	tol-
HORVU2Hr1G092460		1.44	tol+	Os04g0540200
HORVU2Hr1G092710		0.73	tol+	Os04g0541700
HORVU2Hr1G093210	-2.05	-1.4
HORVU2Hr1G093720	-0.74	-1.31		Os04g0583101
HORVU2Hr1G094110		-0.72	tol-	Os04g0578700
HORVU2Hr1G094160		-1.15	tol-	Os04g0578400
HORVU2Hr1G094200		1.07	tol+
HORVU2Hr1G094230	3.52		sen+	Os04g0578000
HORVU2Hr1G094320		0.56	tol+	Os04g0577200
HORVU2Hr1G094870		-1.8	tol-	Os04g0571600
HORVU2Hr1G095080	0.92		sen+
HORVU2Hr1G095870	-1.29		sen-	Os04g0565900
HORVU2Hr1G095880	3.52	3.73		Os04g0564700
HORVU2Hr1G096230	1.7		sen+	Os04g0562100
HORVU2Hr1G096640		0.92	tol+
HORVU2Hr1G096810	-2.17		sen-	Os04g0557500
HORVU2Hr1G097730	2.23		sen+	Os04g0550500
HORVU2Hr1G097940	2.17		sen+
HORVU2Hr1G098020	0.79		sen+	Os04g0548300
HORVU2Hr1G098450		-0.77	tol-	Os04g0616400
HORVU2Hr1G098660		-1.31	tol-	Os10g0177200
HORVU2Hr1G099330		-0.75	tol-	Os04g0612800
HORVU2Hr1G099450	-1.38		sen-	Os04g0612500
HORVU2Hr1G099510	-1.81		sen-	Os04g0612000
HORVU2Hr1G099540	-3.43	-4.96	ΔLFC<-1
HORVU2Hr1G099640		-3.05	tol-	Os04g0611400
HORVU2Hr1G100090		-1.36	tol-
HORVU2Hr1G100100		-0.64	tol-	Os04g0609600
HORVU2Hr1G100980	-0.83		sen-
HORVU2Hr1G101100		-0.84	tol-
HORVU2Hr1G101150	8.06		sen+	Os04g0604900
HORVU2Hr1G101980		-1.8	tol-
HORVU2Hr1G101990	2.78	-1.67	sen+/tol-	Os04g0600300
HORVU2Hr1G102100	-2.04		sen-
HORVU2Hr1G102110	-1.83		sen-
HORVU2Hr1G102190		0.84	tol+
HORVU2Hr1G102530		-0.81	tol-	Os04g0598600
HORVU2Hr1G102710	5.37	-3.13	sen+/tol-	Os04g0597600
HORVU2Hr1G103490		-0.67	tol-
HORVU2Hr1G104100	-5.3		sen-
HORVU2Hr1G104110		-0.71	tol-	Os04g0618200
HORVU2Hr1G104920	-0.94		sen-	Os04g0585200
HORVU2Hr1G105010		0.8	tol+
HORVU2Hr1G105190		-1.19	tol-	Os04g0586500
HORVU2Hr1G105510	1.49		sen+	Os04g0588700
HORVU2Hr1G106100		-0.6	tol-
HORVU2Hr1G106110	0.99		sen+	Os04g0592700
HORVU2Hr1G106410	-0.89		sen-	Os04g0624600
HORVU2Hr1G107100	3.17		sen+	Os04g0627900
HORVU2Hr1G107140		1.53	tol+
HORVU2Hr1G107560		1.14	tol+
HORVU2Hr1G107580		0.51	tol+	Os04g0628600
HORVU2Hr1G107630	1.22		sen+
HORVU2Hr1G107860	1.23		sen+
HORVU2Hr1G108050	0.66		sen+	Os04g0630000
HORVU2Hr1G108260		-1.01	tol-	Os04g0630800
HORVU2Hr1G108320	0.76		sen+	Os02g0556400
HORVU2Hr1G108370		-0.75	tol-	Os04g0631100
HORVU2Hr1G108520		-6.08	tol-	Os12g0232300
HORVU2Hr1G109120		-2.6	tol-	Os09g0255300
HORVU2Hr1G109310		1.51	tol+	Os04g0267600
HORVU2Hr1G109330		-3.61	tol-	Os05g0322900
HORVU2Hr1G109370	1.41		sen+	Os11g0455500
HORVU2Hr1G109940		-2.9	tol-
HORVU2Hr1G110080		-3.47	tol-
HORVU2Hr1G110230	1.3	1.83		Os03g0390200
HORVU2Hr1G111300		-0.71	tol-
HORVU2Hr1G111570		-0.85	tol-
HORVU2Hr1G111600	1.26		sen+	Os01g0511100
HORVU2Hr1G111760		-1.88	tol-	Os04g0655300
HORVU2Hr1G112060	4.42		sen+
HORVU2Hr1G112230		-1.02	tol-	Os07g0232800
HORVU2Hr1G112320		-0.7	tol-
HORVU2Hr1G112600	0.82		sen+	Os04g0652900
HORVU2Hr1G112620	-1.72		sen-
HORVU2Hr1G113100	1.14		sen+
HORVU2Hr1G113180	2.21		sen+	Os04g0650800
HORVU2Hr1G113350	-1.3		sen-	Os04g0650366
HORVU2Hr1G114100		-1.89	tol-
HORVU2Hr1G114390	5.37		sen+
HORVU2Hr1G114440	6.05		sen+
HORVU2Hr1G114450	7.14		sen+
HORVU2Hr1G114530		-0.97	tol-
HORVU2Hr1G114720	-1		sen-	Os04g0644600
HORVU2Hr1G114910	1.35		sen+
HORVU2Hr1G115180	1.89		sen+	Os04g0642000
HORVU2Hr1G115360	1.75	2.35
HORVU2Hr1G115830		-2.22	tol-
HORVU2Hr1G115960		2.03	tol+
HORVU2Hr1G115980		1.99	tol+
HORVU2Hr1G116390	-2.59		sen-
HORVU2Hr1G116670	-1.58	-1.68
HORVU2Hr1G116880		-1.25	tol-	Os04g0634400
HORVU2Hr1G116910		-0.88	tol-
HORVU2Hr1G117360	-1.23	-2.68	ΔLFC<-1	Os04g0632901
HORVU2Hr1G117940		-3.58	tol-
HORVU2Hr1G118010		-4	tol-
HORVU2Hr1G118050		-3.12	tol-	Os04g0667600
HORVU2Hr1G118060		-3.49	tol-	Os04g0667600
HORVU2Hr1G118080		-2.94	tol-	Os04g0667600
HORVU2Hr1G118100		-2.34	tol-	Os04g0667600
HORVU2Hr1G118500		-1.13	tol-	Os01g0768100
HORVU2Hr1G118550		1.43	tol+	Os04g0679400
HORVU2Hr1G118570		1.36	tol+	Os04g0679400
HORVU2Hr1G118770		0.62	tol+
HORVU2Hr1G119380		1.87	tol+
HORVU2Hr1G119500	5.58	-4.86	sen+/tol-	Os04g0677300
HORVU2Hr1G119700		0.92	tol+
HORVU2Hr1G119760		-0.62	tol-	Os04g0676200
HORVU2Hr1G119780		0.93	tol+
HORVU2Hr1G120260		3.3	tol+
HORVU2Hr1G120330	0.86		sen+	Os01g0301500
HORVU2Hr1G120340	1.5		sen+	Os08g0433300
HORVU2Hr1G120490		-1.07	tol-	Os04g0673300
HORVU2Hr1G120660		-1.13	tol-	Os07g0131500
HORVU2Hr1G121030		-0.54	tol-	Os04g0671700
HORVU2Hr1G121050	-1.89	-2.42		Os04g0671300
HORVU2Hr1G121060		-1.18	tol-	Os04g0671200
HORVU2Hr1G121310		-1.69	tol-
HORVU2Hr1G121320	-1.6		sen-
HORVU2Hr1G121440		1.18	tol+
HORVU2Hr1G121630		3.34	tol+
HORVU2Hr1G121650		4.52	tol+
HORVU2Hr1G121820		4.01	tol+	gene-psbA
HORVU2Hr1G122030		1.19	tol+	Os08g0494400
HORVU2Hr1G122270		-4.81	tol-	Os10g0527800
HORVU2Hr1G122660		0.68	tol+
HORVU2Hr1G123350	-0.76	-0.63		Os04g0685500
HORVU2Hr1G123480		-2.17	tol-	Os04g0684900
HORVU2Hr1G123610		1.03	tol+
HORVU2Hr1G123750	-2.02		sen-	Os04g0683850
HORVU2Hr1G123850		0.55	tol+
HORVU2Hr1G124300	3.18		sen+
HORVU2Hr1G124320	5.31		sen+	Os07g0152700
HORVU2Hr1G124330		-5.91	tol-
HORVU2Hr1G124880	-0.79		sen-	Os04g0687900
HORVU2Hr1G125230		-3.11	tol-	Os08g0124600
HORVU2Hr1G125430		3.99	tol+
HORVU2Hr1G125580		1.46	tol+
HORVU2Hr1G125620		1.58	tol+	Os04g0690100
HORVU2Hr1G126810		-2.14	tol-	Os10g0410750
HORVU2Hr1G127100	-0.66		sen-	Os08g0248100
HORVU3Hr1G000120		-1.41	tol-	Os01g0794800
HORVU3Hr1G000170	5.02		sen+	Os01g0108400
HORVU3Hr1G000350	-0.86	-1.07
HORVU3Hr1G000420		0.84	tol+
HORVU3Hr1G000900		-1.36	tol-	Os01g0111100
HORVU3Hr1G000980		-3.91	tol-	Os04g0368800
HORVU3Hr1G001020		-4.11	tol-	Os04g0368800
HORVU3Hr1G001060		-3.55	tol-	Os01g0111700
HORVU3Hr1G001940	-1.01		sen-
HORVU3Hr1G002010	1.03		sen+	Os07g0615000
HORVU3Hr1G002060		1.77	tol+
HORVU3Hr1G002710		-0.87	tol-	Os01g0117900
HORVU3Hr1G002820		-1.69	tol-	Os10g0326900
HORVU3Hr1G003920		-1.41	tol-
HORVU3Hr1G005010		-1.3	tol-	Os03g0374900
HORVU3Hr1G006140	1.89		sen+
HORVU3Hr1G006170	0.98		sen+	Os04g0112300
HORVU3Hr1G006620		-2.89	tol-
HORVU3Hr1G006640		-1.84	tol-	Os10g0136500
HORVU3Hr1G006930		-1.86	tol-	Os01g0135900
HORVU3Hr1G007290		-2.34	tol-	Os01g0134700
HORVU3Hr1G007590		-1.88	tol-	Os01g0137700
HORVU3Hr1G007680		-0.74	tol-	Os01g0137400
HORVU3Hr1G007720		-1.16	tol-	Os01g0137400
HORVU3Hr1G007740		-3.03	tol-	Os01g0137400
HORVU3Hr1G007980		0.9	tol+	Os01g0138900
HORVU3Hr1G010530		-0.49	tol-
HORVU3Hr1G010570		-0.67	tol-
HORVU3Hr1G010830	-1.49		sen-
HORVU3Hr1G011200	1.81		sen+	Os11g0681300
HORVU3Hr1G011710		1.08	tol+	Os01g0149700
HORVU3Hr1G011850	4.97	-8.97	sen+/tol-	Os11g0469900
HORVU3Hr1G012260		1.24	tol+	Os01g0122701
HORVU3Hr1G012650	-0.78		sen-	Os11g0676100
HORVU3Hr1G013180		-2.58	tol-	Os04g0356600
HORVU3Hr1G013380		-1.23	tol-	Os05g0525800
HORVU3Hr1G013390		-2.15	tol-
HORVU3Hr1G013530		-1.09	tol-	Os08g0490800
HORVU3Hr1G013630	-3.5		sen-	Os07g0425000
HORVU3Hr1G013680		-0.79	tol-	Os08g0490800
HORVU3Hr1G013790		-0.55	tol-	Os01g0150000
HORVU3Hr1G013970	-1.38		sen-	Os01g0151700
HORVU3Hr1G014140	3.23		sen+	Os01g0104200
HORVU3Hr1G014270		-1.34	tol-	Os08g0150700
HORVU3Hr1G014890		-0.72	tol-	Os11g0229300
HORVU3Hr1G015780		-3.79	tol-
HORVU3Hr1G015880		0.75	tol+	Os01g0164800
HORVU3Hr1G016860	2.86		sen+
HORVU3Hr1G017020		-0.66	tol-	Os12g0210400
HORVU3Hr1G017330		-2.33	tol-	Os01g0607200
HORVU3Hr1G017990		0.81	tol+	Os01g0164800
HORVU3Hr1G018390		-1.49	tol-
HORVU3Hr1G018670		1.84	tol+	Os10g0415100
HORVU3Hr1G019190		-0.9	tol-
HORVU3Hr1G019230		-1.99	tol-	Os01g0194300
HORVU3Hr1G019670	-0.89		sen-
HORVU3Hr1G019750		-1.44	tol-	Os01g0190300
HORVU3Hr1G019790		-1.02	tol-	Os01g0188400
HORVU3Hr1G019820		-0.9	tol-	Os01g0188100
HORVU3Hr1G020230		-1.59	tol-	Os01g0185300
HORVU3Hr1G020400		0.57	tol+	Os06g0229300
HORVU3Hr1G021310		0.56	tol+	Os01g0182400
HORVU3Hr1G021750	-1.14		sen-	Os01g0179800
HORVU3Hr1G021810		-2.29	tol-	Os01g0179600
HORVU3Hr1G023160	1.07		sen+	Os02g0556400
HORVU3Hr1G023230	2.3	-2.32	sen+/tol-	Os01g0176100
HORVU3Hr1G023400		-2.13	tol-	Os01g0175850
HORVU3Hr1G023430	-2.09	-2.86
HORVU3Hr1G023750	1.51	1.4		Os01g0175100
HORVU3Hr1G024590		-1.84	tol-	Os01g0172100
HORVU3Hr1G024650		-2.12	tol-
HORVU3Hr1G024970		-1.75	tol-	Os11g0521000
HORVU3Hr1G025820		-0.92	tol-	Os11g0432400
HORVU3Hr1G026870	-1.09	-0.92		Os01g0201200
HORVU3Hr1G026920	-0.97		sen-	Os01g0200700
HORVU3Hr1G027060		-6.99	tol-	Os01g0200200
HORVU3Hr1G027650	-1.17		sen-	Os01g0218200
HORVU3Hr1G028020		-5.12	tol-	Os01g0214800
HORVU3Hr1G028060		-2.17	tol-
HORVU3Hr1G028280		-1.2	tol-	Os01g0213400
HORVU3Hr1G028620	2.85	-2.98	sen+/tol-	Os01g0211600
HORVU3Hr1G029010		-2.87	tol-	Os01g0209700
HORVU3Hr1G029350	-1.19	-1.5
HORVU3Hr1G030090		1.42	tol+	Os01g0223600
HORVU3Hr1G030340		-1.04	tol-
HORVU3Hr1G030520	1.37		sen+	Os02g0531200
HORVU3Hr1G030550		1.18	tol+
HORVU3Hr1G030770		1.49	tol+	Os01g0226400
HORVU3Hr1G031020		-1.16	tol-	Os01g0227800
HORVU3Hr1G032370	3.64		sen+	Os01g0237500
HORVU3Hr1G032400		1.6	tol+	Os01g0238500
HORVU3Hr1G033160		0.69	tol+	Os11g0192400
HORVU3Hr1G034110		-2.98	tol-	Os01g0249700
HORVU3Hr1G034440		-0.47	tol-	Os01g0252100
HORVU3Hr1G034640		-0.86	tol-	Os01g0252600
HORVU3Hr1G034780		0.55	tol+	Os12g0166000
HORVU3Hr1G035180		-0.94	tol-	Os01g0254200
HORVU3Hr1G036380		-0.58	tol-	Os01g0261200
HORVU3Hr1G037170	1.13	1.48		Os01g0265200
HORVU3Hr1G038500		0.91	tol+	Os01g0272600
HORVU3Hr1G038950	0.72		sen+
HORVU3Hr1G040290		0.84	tol+
HORVU3Hr1G041600		0.68	tol+
HORVU3Hr1G044660		-1.05	tol-
HORVU3Hr1G045460		1.07	tol+
HORVU3Hr1G045490		1.76	tol+
HORVU3Hr1G048520	-1.49	-1.6		Os01g0559600
HORVU3Hr1G049610	0.69		sen+	Os01g0570700
HORVU3Hr1G049640		-1.48	tol-	Os01g0570800
HORVU3Hr1G050320	1.1		sen+	Os01g0583200
HORVU3Hr1G050340		0.62	tol+	Os01g0583100
HORVU3Hr1G050490		0.93	tol+
HORVU3Hr1G050590		-3.47	tol-	Os01g0584900
HORVU3Hr1G050760		0.72	tol+	Os01g0588800
HORVU3Hr1G050800		-0.97	tol-	Os01g0585300
HORVU3Hr1G052710		-1.89	tol-	Os01g0603300
HORVU3Hr1G052880		-2.52	tol-	Os01g0605100
HORVU3Hr1G053210	1.85	1.19
HORVU3Hr1G053350		-1.1	tol-	Os01g0609300
HORVU3Hr1G053380	0.84		sen+	Os01g0609900
HORVU3Hr1G053760		-0.51	tol-
HORVU3Hr1G053900		-1.3	tol-	Os01g0613500
HORVU3Hr1G055830		-1.22	tol-	Os01g0623500
HORVU3Hr1G055870	0.85	1.17		Os01g0624000
HORVU3Hr1G056500		1.66	tol+
HORVU3Hr1G056640		-3.83	tol-	Os01g0631800
HORVU3Hr1G056830		-1.01	tol-	Os01g0631400
HORVU3Hr1G057090		-0.91	tol-	Os01g0639900
HORVU3Hr1G057140		0.52	tol+
HORVU3Hr1G057530	-1.28		sen-	Os01g0642000
HORVU3Hr1G057950		-2.32	tol-	Os01g0645400
HORVU3Hr1G058470		0.61	tol+	Os01g0533500
HORVU3Hr1G058610		-1.56	tol-	Os01g0651300
HORVU3Hr1G059170	2.13	2.17		Os01g0656200
HORVU3Hr1G059220		-2.99	tol-	Os11g0685700
HORVU3Hr1G059290	-1.14	-1.17		Os01g0658400
HORVU3Hr1G059470		-1.15	tol-	Os01g0660300
HORVU3Hr1G059530		1.1	tol+
HORVU3Hr1G059710	1.09	1.05		Os01g0661400
HORVU3Hr1G060150	-0.69		sen-	Os01g0664000
HORVU3Hr1G060390	-1.24		sen-	Os01g0665200
HORVU3Hr1G060600		-5.39	tol-	Os01g0666000
HORVU3Hr1G060850		1.28	tol+	Os01g0667200
HORVU3Hr1G061080		-1.42	tol-	Os01g0667900
HORVU3Hr1G061690		-0.65	tol-	Os01g0672400
HORVU3Hr1G062430		-3.82	tol-	Os01g0678000
HORVU3Hr1G062510		1.63	tol+	Os08g0310100
HORVU3Hr1G062590	0.93		sen+	Os01g0679700
HORVU3Hr1G062700		-0.79	tol-
HORVU3Hr1G063000	-0.76		sen-	Os04g0599000
HORVU3Hr1G063430		-0.68	tol-	Os01g0684900
HORVU3Hr1G063840		-0.98	tol-	Os01g0688200
HORVU3Hr1G064130		-1.56	tol-
HORVU3Hr1G064180		-1.68	tol-	Os01g0690200
HORVU3Hr1G064320	1.81		sen+	Os01g0692000
HORVU3Hr1G064680		-2.44	tol-
HORVU3Hr1G065240		0.88	tol+	Os01g0695700
HORVU3Hr1G065320	2.7		sen+	Os01g0290700
HORVU3Hr1G066310		2.17	tol+	Os07g0642200
HORVU3Hr1G066420		-0.47	tol-	Os01g0706400
HORVU3Hr1G066430	0.9		sen+	Os01g0706500
HORVU3Hr1G066650	2.12	1.26		Os11g0490200
HORVU3Hr1G066880	0.91	0.94		Os01g0709500
HORVU3Hr1G066960		-0.8	tol-	Os01g0710700
HORVU3Hr1G067020		-0.66	tol-	Os12g0420200
HORVU3Hr1G067290	1.26		sen+	Os06g0611600
HORVU3Hr1G067380	1.61	1.98
HORVU3Hr1G067760		-1.65	tol-	Os01g0716500
HORVU3Hr1G068120		-1.75	tol-	Os01g0719000
HORVU3Hr1G068170		1.47	tol+	Os01g0719400
HORVU3Hr1G068200	-1.41	-0.98		Os01g0719600
HORVU3Hr1G068600		0.83	tol+	Os01g0723400
HORVU3Hr1G068620		-0.99	tol-	Os01g0722700
HORVU3Hr1G068700	1.99		sen+	Os01g0723600
HORVU3Hr1G068750	1.14	1.45
HORVU3Hr1G069330		-0.95	tol-
HORVU3Hr1G069590	1.23		sen+	Os01g0733200
HORVU3Hr1G069650	2.94		sen+	Os01g0733500
HORVU3Hr1G069730		-1.21	tol-
HORVU3Hr1G070610	1.31		sen+	Os01g0742000
HORVU3Hr1G070620		-1	tol-	Os01g0741900
HORVU3Hr1G070690	0.87	0.6		Os01g0742500
HORVU3Hr1G070700		-3.1	tol-	Os01g0742400
HORVU3Hr1G070850	2.74	2.78		Os01g0743500
HORVU3Hr1G071090	0.64		sen+	Os01g0746200
HORVU3Hr1G071120		-1.81	tol-
HORVU3Hr1G071140		0.85	tol+
HORVU3Hr1G071170		-1.32	tol-	Os01g0746400
HORVU3Hr1G071470		-2.86	tol-	Os01g0342750
HORVU3Hr1G072230	0.68		sen+	Os01g0752700
HORVU3Hr1G072640		0.53	tol+	Os01g0755100
HORVU3Hr1G072670		-1.66	tol-	Os01g0755500
HORVU3Hr1G073180		-2.64	tol-	Os01g0759900
HORVU3Hr1G073240		-2.16	tol-	Os01g0760900
HORVU3Hr1G073470		-0.65	tol-	Os01g0761100
HORVU3Hr1G073740	-1.46	-1.13
HORVU3Hr1G073780		-1.37	tol-
HORVU3Hr1G074250	-0.97	-1.27		Os01g0764950
HORVU3Hr1G074270		-1.53	tol-
HORVU3Hr1G074360	8.16	9.65	ΔLFC>1	Os12g0187800
HORVU3Hr1G074570		-1.11	tol-	Os01g0766900
HORVU3Hr1G074640		-0.43	tol-	Os01g0767900
HORVU3Hr1G074960	3.49		sen+
HORVU3Hr1G075150		-3.5	tol-	Os01g0771000
HORVU3Hr1G075920		-1.91	tol-	Os01g0775400
HORVU3Hr1G075960		0.95	tol+
HORVU3Hr1G076890		-0.65	tol-	Os01g0782200
HORVU3Hr1G077130		-1.2	tol-
HORVU3Hr1G077250		-0.71	tol-	Os01g0784800
HORVU3Hr1G077530		-0.69	tol-	Os01g0786800
HORVU3Hr1G077670		-1.11	tol-	Os01g0788500
HORVU3Hr1G077780		1.08	tol+
HORVU3Hr1G077890		-1.33	tol-	Os01g0793900
HORVU3Hr1G077930	3.44	2.42	ΔLFC<-1	Os01g0794400
HORVU3Hr1G077950	3.16	-3.33	sen+/tol-	Os01g0795200
HORVU3Hr1G077980	1.09		sen+	Os05g0125600
HORVU3Hr1G078360	2.44	4	ΔLFC>1	Os01g0800500
HORVU3Hr1G078680		-1.88	tol-	Os01g0803200
HORVU3Hr1G078840		-1.55	tol-	Os01g0805400
HORVU3Hr1G079750		1.17	tol+	Os01g0813700
HORVU3Hr1G080500	-1.63	-3.54	ΔLFC<-1	Os06g0641500
HORVU3Hr1G080810		1.32	tol+	Os01g0819800
HORVU3Hr1G080830		-1.14	tol-	Os01g0820000
HORVU3Hr1G081100		-1.17	tol-	Os01g0822200
HORVU3Hr1G081380		-0.62	tol-	Os08g0110500
HORVU3Hr1G081420	-0.66		sen-	Os01g0824600
HORVU3Hr1G081570		-0.79	tol-	Os01g0878700
HORVU3Hr1G081600	-1.94		sen-	Os01g0878300
HORVU3Hr1G082210		-1.21	tol-	Os01g0874300
HORVU3Hr1G082230		-0.6	tol-	Os01g0873700
HORVU3Hr1G082280		-0.75	tol-	Os01g0873100
HORVU3Hr1G082590		-3.11	tol-	Os01g0871100
HORVU3Hr1G082670		0.59	tol+	Os01g0870100
HORVU3Hr1G082690		0.83	tol+	Os01g0869900
HORVU3Hr1G082930	1.07	1.88		Os01g0868300
HORVU3Hr1G083380		-1.42	tol-
HORVU3Hr1G083650		-1.21	tol-	Os01g0864200
HORVU3Hr1G083680		-3.3	tol-
HORVU3Hr1G083750		-0.61	tol-	Os01g0863400
HORVU3Hr1G083820		-3.17	tol-	Os01g0862800
HORVU3Hr1G084590		0.98	tol+	Os01g0857200
HORVU3Hr1G084660	-0.68		sen-
HORVU3Hr1G084970		-1.84	tol-	Os01g0855200
HORVU3Hr1G085180		-1.76	tol-	Os01g0853700
HORVU3Hr1G085220		1.24	tol+
HORVU3Hr1G085270		-0.89	tol-	Os04g0234600
HORVU3Hr1G085480	1.83		sen+
HORVU3Hr1G085520		-1.16	tol-	Os01g0850550
HORVU3Hr1G085760	3.01		sen+	Os01g0848200
HORVU3Hr1G085780		-0.74	tol-	Os01g0847800
HORVU3Hr1G085890	2.14		sen+	Os01g0173900
HORVU3Hr1G085930	1.7	1.1		Os01g0846300
HORVU3Hr1G086020		0.97	tol+	Os01g0844800
HORVU3Hr1G086050	0.9		sen+
HORVU3Hr1G086190		-1.71	tol-
HORVU3Hr1G086210		-1.01	tol-	Os01g0842200
HORVU3Hr1G086220		-2.86	tol-	Os01g0841700
HORVU3Hr1G086230		-4.58	tol-	Os01g0841700
HORVU3Hr1G086240		-4.56	tol-	Os01g0841700
HORVU3Hr1G086380		-1.01	tol-	Os01g0841000
HORVU3Hr1G086400		-1.07	tol-	Os02g0515200
HORVU3Hr1G087010	2.56		sen+	Os01g0837600
HORVU3Hr1G087050		-0.85	tol-	Os01g0837000
HORVU3Hr1G087420	-3.44		sen-	Os08g0489300
HORVU3Hr1G087740		-1.53	tol-	Os01g0830700
HORVU3Hr1G088200		-1.91	tol-	Os01g0826400
HORVU3Hr1G088470		-0.61	tol-	Os12g0283900
HORVU3Hr1G088970	1.58		sen+	Os01g0901900
HORVU3Hr1G089300	8.43		sen+
HORVU3Hr1G089360	-0.89		sen-	Os01g0898900
HORVU3Hr1G089490		-0.78	tol-	Os05g0588300
HORVU3Hr1G089550		-1.4	tol-	Os01g0897300
HORVU3Hr1G089830		-1.22	tol-	Os01g0895600
HORVU3Hr1G090030		-1.16	tol-	Os01g0892800
HORVU3Hr1G090440		-0.98	tol-
HORVU3Hr1G090730	0.83		sen+	Os01g0886000
HORVU3Hr1G090760	-0.78	-0.83		Os01g0885600
HORVU3Hr1G090820	-1	-0.74		Os01g0885200
HORVU3Hr1G091020	2.73		sen+	Os01g0882800
HORVU3Hr1G091120		-2.06	tol-	Os01g0882800
HORVU3Hr1G091400		-0.86	tol-	Os01g0880200
HORVU3Hr1G092430		0.84	tol+	Os01g0909200
HORVU3Hr1G092520		1.04	tol+	Os01g0910900
HORVU3Hr1G092680	1.36		sen+	Os01g0591000
HORVU3Hr1G092840	-1.1		sen-	Os01g0912900
HORVU3Hr1G092990		0.99	tol+	Os01g0913800
HORVU3Hr1G093170	4.37	6.72	ΔLFC>1	Os11g0275000
HORVU3Hr1G093530		2	tol+	Os01g0917500
HORVU3Hr1G093830		2.62	tol+	Os01g0919400
HORVU3Hr1G094050		-0.58	tol-	Os01g0919900
HORVU3Hr1G094100	1.71		sen+	Os04g0208600
HORVU3Hr1G094160	-0.99		sen-
HORVU3Hr1G094340		-2.14	tol-	Os01g0921000
HORVU3Hr1G094870		0.76	tol+	Os01g0923700
HORVU3Hr1G095070		1.44	tol+	Os01g0923000
HORVU3Hr1G095300		-0.86	tol-	Os11g0621400
HORVU3Hr1G095340	-2.09	-1.39		Os01g0924200
HORVU3Hr1G095730	3.48		sen+	Os10g0530500
HORVU3Hr1G096210		-1.03	tol-	Os01g0926700
HORVU3Hr1G096360		-2.25	tol-	Os01g0615200
HORVU3Hr1G096620		-0.59	tol-	Os01g0928600
HORVU3Hr1G096720	2.7		sen+	Os04g0452300
HORVU3Hr1G096740		-1.24	tol-	Os01g0923300
HORVU3Hr1G096760		-2.3	tol-	Os09g0130700
HORVU3Hr1G096830		-1.58	tol-	Os12g0257000
HORVU3Hr1G096860		-1.84	tol-	Os01g0930400
HORVU3Hr1G096920		-0.61	tol-	Os11g0226933
HORVU3Hr1G097070		-0.75	tol-	Os01g0931300
HORVU3Hr1G097200		0.98	tol+	Os01g0927600
HORVU3Hr1G097210		-1.81	tol-	Os01g0931400
HORVU3Hr1G097260		-2.46	tol-	Os01g0931600
HORVU3Hr1G097390		-1.71	tol-	Os01g0931600
HORVU3Hr1G097860	9.46		sen+	Os11g0264000
HORVU3Hr1G098340		-4.25	tol-	Os01g0934800
HORVU3Hr1G098360		-2.34	tol-	Os01g0934900
HORVU3Hr1G099430		1.02	tol+	Os08g0244400
HORVU3Hr1G099440	-3.5		sen-	Os02g0493050
HORVU3Hr1G099530		-3.47	tol-	Os07g0241700
HORVU3Hr1G099630		-1.26	tol-
HORVU3Hr1G100190		-2.58	tol-	Os06g0329900
HORVU3Hr1G104090	0.98		sen+	Os03g0195450
HORVU3Hr1G104940		-4.43	tol-
HORVU3Hr1G105300		-3.7	tol-	Os01g0713200
HORVU3Hr1G105360	1.17		sen+	Os01g0940000
HORVU3Hr1G105560		-2.51	tol-	Os01g0941500
HORVU3Hr1G105620		-3.14	tol-	Os01g0942300
HORVU3Hr1G105720	3.95		sen+
HORVU3Hr1G105790	-1.87	-2.12
HORVU3Hr1G105870	-1.33	-3.03	ΔLFC<-1	Os01g0945600
HORVU3Hr1G106700		-0.58	tol-	Os01g0948500
HORVU3Hr1G106720	1.24	1.98		Os01g0948400
HORVU3Hr1G106850		-0.65	tol-
HORVU3Hr1G106950		-1.14	tol-	Os01g0949300
HORVU3Hr1G107090		-1.57	tol-	Os01g0949500
HORVU3Hr1G107290	-0.71		sen-	Os01g0950866
HORVU3Hr1G108100		-2.09	tol-	Os08g0371608
HORVU3Hr1G108900		-1.55	tol-	Os06g0303800
HORVU3Hr1G108920		-1.74	tol-
HORVU3Hr1G108970		-1.34	tol-	Os06g0303800
HORVU3Hr1G109430	4.33		sen+
HORVU3Hr1G109460		-3.46	tol-	Os08g0356500
HORVU3Hr1G110330		1.38	tol+
HORVU3Hr1G110580		-2.95	tol-
HORVU3Hr1G110850	-0.72		sen-
HORVU3Hr1G111040	-0.86		sen-
HORVU3Hr1G111600	4.04		sen+
HORVU3Hr1G112030	4.08		sen+
HORVU3Hr1G112050	4.66		sen+	Os01g0959100
HORVU3Hr1G112590		0.78	tol+	Os01g0965400
HORVU3Hr1G112600		0.94	tol+	Os01g0551000
HORVU3Hr1G113120	5.51		sen+	Os11g0592100
HORVU3Hr1G114240	1.6	1.81		Os01g0970900
HORVU3Hr1G115020	0.86	1.33		Os01g0971900
HORVU3Hr1G115860		-1.45	tol-	Os01g0973500
HORVU3Hr1G115940	0.84		sen+	Os01g0973600
HORVU3Hr1G116650		-1.36	tol-	Os01g0974800
HORVU3Hr1G116740		1.85	tol+
HORVU3Hr1G116770	-4.38		sen-	Os08g0157500
HORVU3Hr1G116790	-1.36	-1.5		Os01g0975900
HORVU3Hr1G117450		2.5	tol+	Os04g0309900
HORVU3Hr1G117510	-1.57	-1.35
HORVU3Hr1G117610		-0.69	tol-
HORVU4Hr1G000030		-1.19	tol-
HORVU4Hr1G000040		-0.86	tol-
HORVU4Hr1G000050		0.69	tol+	Os09g0570800
HORVU4Hr1G000120	1.53		sen+
HORVU4Hr1G000280		0.84	tol+	Os12g0481400
HORVU4Hr1G000810		-1.41	tol-
HORVU4Hr1G000910	1.74		sen+	Os09g0571400
HORVU4Hr1G001170	1.22		sen+
HORVU4Hr1G001250	3.73		sen+	Os08g0157500
HORVU4Hr1G001700		-0.96	tol-
HORVU4Hr1G002020	-0.99	-0.71		Os03g0654400
HORVU4Hr1G002050		-1.33	tol-
HORVU4Hr1G002390		-7.12	tol-	Os03g0657400
HORVU4Hr1G002480		-0.88	tol-
HORVU4Hr1G003040		-0.72	tol-	Os03g0667100
HORVU4Hr1G003600		-0.59	tol-	Os03g0678400
HORVU4Hr1G004000		-2.61	tol-
HORVU4Hr1G004150	1.04		sen+	Os03g0684100
HORVU4Hr1G004460		-1.22	tol-	Os03g0687000
HORVU4Hr1G004540		-1.25	tol-	Os03g0688300
HORVU4Hr1G004800	1.08	0.99		Os03g0689900
HORVU4Hr1G004820		2.16	tol+	Os03g0689300
HORVU4Hr1G005110		-1.87	tol-	Os03g0691800
HORVU4Hr1G005480		1.68	tol+	Os07g0515900
HORVU4Hr1G005490		2.06	tol+
HORVU4Hr1G005920	1.05		sen+	Os03g0700700
HORVU4Hr1G007220	2.47	1.58		Os03g0709300
HORVU4Hr1G007340		-1.46	tol-
HORVU4Hr1G008610		1.09	tol+	Os03g0719800
HORVU4Hr1G008700		-1.96	tol-	Os05g0421750
HORVU4Hr1G009340		-0.87	tol-	Os03g0724300
HORVU4Hr1G009620		-0.54	tol-	Os08g0107400
HORVU4Hr1G010030		-1.34	tol-	Os10g0101000
HORVU4Hr1G010270	-1.07	-1.17		Os03g0731050
HORVU4Hr1G010980		-1.25	tol-	Os03g0348900
HORVU4Hr1G011600		-1.36	tol-	Os03g0628800
HORVU4Hr1G011740		1.67	tol+	Os11g0671000
HORVU4Hr1G013180	-1.64		sen-	Os12g0580700
HORVU4Hr1G013210	5.26		sen+	Os03g0607200
HORVU4Hr1G013840		-1.88	tol-	Os08g0249900
HORVU4Hr1G014270	-1.25		sen-	Os11g0282300
HORVU4Hr1G014290		-1.97	tol-
HORVU4Hr1G014900	-1.3		sen-	Os11g0247000
HORVU4Hr1G015040	-1.39		sen-	Os11g0245500
HORVU4Hr1G015640	2.75		sen+	Os11g0235200
HORVU4Hr1G015710		-1.5	tol-	Os11g0233800
HORVU4Hr1G015880		-0.64	tol-
HORVU4Hr1G015890		-3.89	tol-	Os11g0225000
HORVU4Hr1G015940		-1.18	tol-	Os11g0225000
HORVU4Hr1G016080		-0.99	tol-	Os11g0222000
HORVU4Hr1G016730		-1.08	tol-	Os11g0213600
HORVU4Hr1G017240		-3.98	tol-
HORVU4Hr1G017430		-1.6	tol-	Os11g0184900
HORVU4Hr1G018150	1.92	3.82	ΔLFC>1
HORVU4Hr1G018180		4.35	tol+
HORVU4Hr1G018360		-1.81	tol-	Os11g0180900
HORVU4Hr1G018440		-1.31	tol-
HORVU4Hr1G019530		-0.71	tol-	Os11g0171500
HORVU4Hr1G019570		-0.76	tol-
HORVU4Hr1G019780		0.86	tol+	Os11g0169800
HORVU4Hr1G020000		-1.67	tol-
HORVU4Hr1G020030		0.78	tol+
HORVU4Hr1G021000	-0.78		sen-
HORVU4Hr1G021040		-0.85	tol-	Os11g0157400
HORVU4Hr1G021390		-1.41	tol-	Os12g0158600
HORVU4Hr1G022170		-1.03	tol-
HORVU4Hr1G022580		-0.6	tol-
HORVU4Hr1G022950		1.62	tol+	Os12g0116000
HORVU4Hr1G023110		1.24	tol+
HORVU4Hr1G023260		-1.58	tol-	Os12g0117400
HORVU4Hr1G023390		-1.55	tol-	Os11g0520500
HORVU4Hr1G023490	1.32	0.99		Os01g0897000
HORVU4Hr1G023680	-1.88		sen-
HORVU4Hr1G024290		0.69	tol+
HORVU4Hr1G024560		0.6	tol+	Os12g0106600
HORVU4Hr1G025080		1.07	tol+	Os03g0719100
HORVU4Hr1G025510		2.98	tol+
HORVU4Hr1G026330		0.54	tol+	Os11g0134500
HORVU4Hr1G026570		0.84	tol+	Os11g0136400
HORVU4Hr1G026720		0.82	tol+	Os12g0128700
HORVU4Hr1G026770		-2.39	tol-	Os11g0130400
HORVU4Hr1G027050		4.13	tol+	Os11g0708100
HORVU4Hr1G027260		-0.8	tol-	Os11g0707000
HORVU4Hr1G027270		0.6	tol+
HORVU4Hr1G027600		0.65	tol+	Os01g0513700
HORVU4Hr1G027740	0.99		sen+	Os11g0704600
HORVU4Hr1G029350	-0.85		sen-
HORVU4Hr1G029740		1.35	tol+
HORVU4Hr1G030810		-0.68	tol-
HORVU4Hr1G032920		0.67	tol+	Os11g0672400
HORVU4Hr1G034860		-1.01	tol-
HORVU4Hr1G034950		1.26	tol+
HORVU4Hr1G039410	-1.29		sen-
HORVU4Hr1G040290	-1.34		sen-	Os03g0387900
HORVU4Hr1G041810	0.87	1.54		Os03g0350300
HORVU4Hr1G043530		-0.77	tol-	Os11g0195500
HORVU4Hr1G043760		-1.44	tol-
HORVU4Hr1G043990		-1.03	tol-	Os11g0199801
HORVU4Hr1G046590		-1.54	tol-
HORVU4Hr1G047580	0.87		sen+	Os11g0579800
HORVU4Hr1G050160		0.79	tol+	Os03g0336300
HORVU4Hr1G050230		-0.65	tol-	Os03g0336000
HORVU4Hr1G050930	-1.49	-0.96		Os03g0332100
HORVU4Hr1G051360		1.09	tol+	Os03g0327100
HORVU4Hr1G051450		-2	tol-	Os03g0326000
HORVU4Hr1G051740		-1.08	tol-	Os03g0323500
HORVU4Hr1G052090		1.05	tol+	Os03g0320900
HORVU4Hr1G052170		-0.48	tol-	Os03g0320100
HORVU4Hr1G052210		-0.89	tol-
HORVU4Hr1G052320		-1.9	tol-
HORVU4Hr1G052450	2.4		sen+	Os03g0316200
HORVU4Hr1G052790		1.66	tol+	Os03g0313800
HORVU4Hr1G053130		-2.71	tol-	Os03g0310800
HORVU4Hr1G054000		0.65	tol+	Os03g0306200
HORVU4Hr1G054060	0.85		sen+
HORVU4Hr1G054210		-0.74	tol-	Os03g0305000
HORVU4Hr1G054400		0.57	tol+
HORVU4Hr1G054420		-2.71	tol-
HORVU4Hr1G054770		-2.15	tol-	Os03g0301200
HORVU4Hr1G054880	0.98		sen+	Os03g0300300
HORVU4Hr1G054920	1.02		sen+	Os03g0299900
HORVU4Hr1G054970		-2.05	tol-
HORVU4Hr1G055220	-3.62	-3.39		Os03g0297600
HORVU4Hr1G055270		-0.91	tol-	Os03g0297000
HORVU4Hr1G055300		2.12	tol+	Os03g0296700
HORVU4Hr1G055690		-0.77	tol-	Os03g0173900
HORVU4Hr1G056950	-0.97	-0.91		Os03g0287100
HORVU4Hr1G057000	-2.62		sen-	Os03g0286900
HORVU4Hr1G057140		-0.63	tol-	Os03g0286200
HORVU4Hr1G057290		-1.46	tol-
HORVU4Hr1G057410	-0.8		sen-	Os03g0284600
HORVU4Hr1G057550		-0.79	tol-
HORVU4Hr1G057740		-5.17	tol-	Os03g0283200
HORVU4Hr1G059060		-0.48	tol-	Os03g0278400
HORVU4Hr1G059150		-3.04	tol-	Os03g0277700
HORVU4Hr1G059260		3.78	tol+	Os03g0277300
HORVU4Hr1G059340		0.86	tol+	Os03g0276600
HORVU4Hr1G059860		-0.85	tol-	Os03g0273800
HORVU4Hr1G060260		-1.25	tol-	Os03g0270500
HORVU4Hr1G060370	1.96	1.04		Os03g0268600
HORVU4Hr1G061120	2.27		sen+	Os03g0264400
HORVU4Hr1G061130		-0.63	tol-	Os03g0264300
HORVU4Hr1G061170		-0.78	tol-	Os03g0263900
HORVU4Hr1G062330		-4.22	tol-	Os03g0255900
HORVU4Hr1G062570	1.12		sen+	Os02g0301000
HORVU4Hr1G062730	1.55		sen+	Os03g0252100
HORVU4Hr1G062770	2.14	1.48		Os03g0251800
HORVU4Hr1G062830	1.55	1.72		Os02g0235900
HORVU4Hr1G062920		-0.73	tol-	Os03g0244000
HORVU4Hr1G062950	1.32		sen+	Os03g0249900
HORVU4Hr1G063050		-1.26	tol-
HORVU4Hr1G063420		-1.2	tol-	Os03g0245700
HORVU4Hr1G063590		-2.64	tol-	Os03g0244950
HORVU4Hr1G063640		-0.81	tol-	Os03g0244700
HORVU4Hr1G063660		-3.6	tol-
HORVU4Hr1G063690		-1.4	tol-	Os03g0244200
HORVU4Hr1G064440		-0.69	tol-	Os03g0238300
HORVU4Hr1G064720		-0.83	tol-	Os03g0237100
HORVU4Hr1G064790	2.08		sen+	Os03g0236200
HORVU4Hr1G064880		1.78	tol+	Os03g0235200
HORVU4Hr1G065110	-0.9		sen-	Os03g0226400
HORVU4Hr1G065470	1.87	1.65		Os03g0227900
HORVU4Hr1G065560	-0.8	-1.06		Os03g0228200
HORVU4Hr1G065900		-0.58	tol-	Os03g0231150
HORVU4Hr1G065920		-1.31	tol-	Os03g0231700
HORVU4Hr1G066000	-2.15	-0.74	ΔLFC>1	Os03g0232400
HORVU4Hr1G066140		-3.13	tol-	Os03g0233000
HORVU4Hr1G066230		2.45	tol+	Os03g0225900
HORVU4Hr1G066310		-1.08	tol-	Os03g0225700
HORVU4Hr1G067020		-2.55	tol-	Os03g0222600
HORVU4Hr1G067140		-0.78	tol-
HORVU4Hr1G067340		-0.88	tol-	Os03g0220100
HORVU4Hr1G067370		-0.64	tol-	Os03g0219300
HORVU4Hr1G067450		-3.11	tol-
HORVU4Hr1G067840		-1.99	tol-	Os03g0215000
HORVU4Hr1G067930	-0.9	-1.42		Os03g0214200
HORVU4Hr1G068770		0.96	tol+	Os03g0211900
HORVU4Hr1G068830		0.95	tol+	Os03g0211700
HORVU4Hr1G068960	1.05		sen+	Os03g0374600
HORVU4Hr1G069100		-3.33	tol-	Os11g0291000
HORVU4Hr1G069300		2.39	tol+	Os08g0417000
HORVU4Hr1G069480		-0.57	tol-	Os03g0206700
HORVU4Hr1G069990		-0.47	tol-	Os03g0203700
HORVU4Hr1G070090	0.78	1.15		Os03g0203100
HORVU4Hr1G070370	1.04		sen+
HORVU4Hr1G070610		3.78	tol+	Os03g0198600
HORVU4Hr1G071020		-2.54	tol-	Os03g0197200
HORVU4Hr1G071070	-1.07		sen-	Os03g0197000
HORVU4Hr1G071250		-0.62	tol-	Os03g0195500
HORVU4Hr1G071730	-1.09		sen-	Os03g0192700
HORVU4Hr1G072310		-1.7	tol-	Os03g0153100
HORVU4Hr1G072360		-4.6	tol-	Os03g0155000
HORVU4Hr1G072370		-1.46	tol-
HORVU4Hr1G072480		-3.52	tol-
HORVU4Hr1G073400		-1.03	tol-	Os03g0161200
HORVU4Hr1G073580	0.64		sen+	Os03g0161500
HORVU4Hr1G074120		0.53	tol+
HORVU4Hr1G074620		2.9	tol+	Os07g0572100
HORVU4Hr1G074840	1.69	1.28		Os03g0168600
HORVU4Hr1G075320	1.11		sen+
HORVU4Hr1G075550		-3.65	tol-
HORVU4Hr1G075710	1.18		sen+	Os03g0796501
HORVU4Hr1G075990		0.59	tol+	Os03g0175200
HORVU4Hr1G076490	1.02	0.99		Os03g0179000
HORVU4Hr1G076520		-2.1	tol-
HORVU4Hr1G076750		-1.15	tol-	Os01g0787600
HORVU4Hr1G076820		-1.98	tol-
HORVU4Hr1G076840		-1.67	tol-
HORVU4Hr1G077220	-0.9		sen-	Os03g0182400
HORVU4Hr1G077310		1.79	tol+	Os03g0183000
HORVU4Hr1G077350		2.96	tol+	Os03g0183500
HORVU4Hr1G077640		0.83	tol+	Os03g0185500
HORVU4Hr1G078540		0.99	tol+	Os03g0190300
HORVU4Hr1G078610		0.67	tol+	Os03g0190900
HORVU4Hr1G078690		-0.67	tol-	Os03g0191400
HORVU4Hr1G079400	-0.82		sen-	Os03g0146500
HORVU4Hr1G079420		0.87	tol+
HORVU4Hr1G079460		0.89	tol+
HORVU4Hr1G080110		-1.55	tol-	Os03g0148700
HORVU4Hr1G080810		-1.11	tol-
HORVU4Hr1G080820		0.68	tol+
HORVU4Hr1G081210		-1.21	tol-	Os03g0134500
HORVU4Hr1G081220		0.59	tol+	Os03g0134300
HORVU4Hr1G081290		0.99	tol+	Os03g0133800
HORVU4Hr1G081430		-2.64	tol-	Os03g0133000
HORVU4Hr1G081590	1.73		sen+
HORVU4Hr1G082000	-3.01	-2.77		Os05g0128400
HORVU4Hr1G082020	0.96	0.68		Os03g0131400
HORVU4Hr1G082240		-0.68	tol-	Os08g0398400
HORVU4Hr1G082700		-0.85	tol-	Os03g0129300
HORVU4Hr1G082910		1.22	tol+	Os03g0128200
HORVU4Hr1G083100		-1.76	tol-	Os03g0126700
HORVU4Hr1G083360	0.6		sen+	Os03g0125300
HORVU4Hr1G083410	0.77		sen+	Os03g0151700
HORVU4Hr1G083650		-1.28	tol-	Os03g0138700
HORVU4Hr1G083980	-1.27	-0.92		Os02g0668000
HORVU4Hr1G084280		-0.5	tol-	Os03g0142900
HORVU4Hr1G084340	0.99		sen+	Os03g0142500
HORVU4Hr1G084510		-1.32	tol-	Os03g0124200
HORVU4Hr1G084600		-0.92	tol-	Os03g0123800
HORVU4Hr1G084810		-1.92	tol-	Os03g0122300
HORVU4Hr1G084850		2.34	tol+	Os03g0122100
HORVU4Hr1G085050		1.4	tol+	Os08g0531000
HORVU4Hr1G085460	1.91		sen+
HORVU4Hr1G085800		-2.81	tol-	Os07g0671000
HORVU4Hr1G085820		-2.71	tol-	Os03g0118200
HORVU4Hr1G086270		-1.49	tol-	Os03g0116300
HORVU4Hr1G086300		-2.92	tol-	Os02g0534400
HORVU4Hr1G086320		-3.46	tol-	Os03g0101100
HORVU4Hr1G086500		1.34	tol+	Os01g0360200
HORVU4Hr1G086540		-0.57	tol-	Os03g0115400
HORVU4Hr1G086660		-2.08	tol-	Os03g0107700
HORVU4Hr1G087100		-1.58	tol-	Os03g0106400
HORVU4Hr1G087340	1.34		sen+
HORVU4Hr1G087570		1.2	tol+	Os10g0422566
HORVU4Hr1G087770	-9.62		sen-	Os03g0103300
HORVU4Hr1G087970		1.15	tol+
HORVU4Hr1G088600		-3.46	tol-	Os10g0469600
HORVU4Hr1G088780		-1.36	tol-	Os03g0115000
HORVU4Hr1G088860		0.8	tol+	Os03g0114800
HORVU4Hr1G089350	1.14		sen+	Os03g0111800
HORVU4Hr1G089910		-1.53	tol-
HORVU4Hr1G090170	1.52		sen+	Os03g0100500
HORVU4Hr1G090660		1.65	tol+	Os02g0259900
HORVU4Hr1G090780		1.47	tol+
HORVU5Hr1G000640		-4.38	tol-	Os12g0639200
HORVU5Hr1G000650		-1.99	tol-
HORVU5Hr1G000780		1.5	tol+
HORVU5Hr1G000940	6.58		sen+
HORVU5Hr1G001180		2.08	tol+	Os12g0559934
HORVU5Hr1G001220		0.61	tol+	Os12g0636100
HORVU5Hr1G001650		-0.96	tol-
HORVU5Hr1G002120	1.01		sen+
HORVU5Hr1G002340		-3.96	tol-	Os05g0488100
HORVU5Hr1G004340	0.89		sen+
HORVU5Hr1G005180	3.3	-2.9	sen+/tol-	Os12g0630500
HORVU5Hr1G005740		-1.23	tol-	Os12g0626400
HORVU5Hr1G006330		-4.81	tol-
HORVU5Hr1G006830	1.55		sen+	Os10g0429651
HORVU5Hr1G007680		-0.83	tol-	Os12g0620600
HORVU5Hr1G007770		1.07	tol+
HORVU5Hr1G008180		-0.96	tol-	Os12g0616800
HORVU5Hr1G009200		-0.71	tol-	Os12g0420200
HORVU5Hr1G009840		-1.66	tol-	Os07g0271000
HORVU5Hr1G010900		0.48	tol+	Os03g0644200
HORVU5Hr1G011540		1.85	tol+
HORVU5Hr1G011650		1.6	tol+
HORVU5Hr1G011850	0.95		sen+	Os12g0609800
HORVU5Hr1G011920	1.46		sen+	Os12g0289800
HORVU5Hr1G012010		-0.89	tol-
HORVU5Hr1G012030		-3.32	tol-
HORVU5Hr1G012240		-2.18	tol-	Os05g0244500
HORVU5Hr1G012740	-2.45		sen-	Os05g0244500
HORVU5Hr1G012900		0.56	tol+	Os12g0605800
HORVU5Hr1G012990		3.98	tol+
HORVU5Hr1G013550		0.92	tol+	Os02g0327700
HORVU5Hr1G014060		-3.62	tol-	Os12g0603800
HORVU5Hr1G014170	-3.48	-1.95	ΔLFC>1	Os12g0601800
HORVU5Hr1G014310		0.51	tol+	Os12g0601200
HORVU5Hr1G014320		2.87	tol+	Os12g0601000
HORVU5Hr1G015390		4.34	tol+
HORVU5Hr1G015430		4.04	tol+
HORVU5Hr1G015520		3.32	tol+
HORVU5Hr1G016400		-1.05	tol-	Os08g0566900
HORVU5Hr1G017580		1.49	tol+
HORVU5Hr1G018050		1.55	tol+
HORVU5Hr1G018220		1.07	tol+	Os12g0586300
HORVU5Hr1G018750		-3.54	tol-	Os12g0582700
HORVU5Hr1G018780		-0.8	tol-	Os12g0582000
HORVU5Hr1G019030		0.94	tol+	Os08g0345700
HORVU5Hr1G019650		-2.03	tol-	Os12g0578400
HORVU5Hr1G019820		-2.7	tol-
HORVU5Hr1G019940		0.85	tol+	Os02g0812400
HORVU5Hr1G020200		0.68	tol+	Os12g0577100
HORVU5Hr1G023090	-1.7	-1.23		Os12g0560400
HORVU5Hr1G023160	-1.33	-1.36		Os12g0485600
HORVU5Hr1G023520	1.42		sen+	Os06g0102900
HORVU5Hr1G024180		0.81	tol+	Os12g0552300
HORVU5Hr1G024340	-0.79		sen-	Os10g0405600
HORVU5Hr1G025950		-0.75	tol-	Os12g0534100
HORVU5Hr1G027150		1.07	tol+	Os12g0527900
HORVU5Hr1G027710	-0.64	-0.63		Os07g0249700
HORVU5Hr1G028180		-0.9	tol-	Os12g0510900
HORVU5Hr1G028460		-2.44	tol-	Os12g0506500
HORVU5Hr1G028550	-0.95		sen-
HORVU5Hr1G029910		0.56	tol+
HORVU5Hr1G030460	-0.78		sen-
HORVU5Hr1G032980		-1.01	tol-
HORVU5Hr1G033540		-1.22	tol-	Os12g0291200
HORVU5Hr1G035820	1.04	1.19		Os12g0166500
HORVU5Hr1G036160		-0.53	tol-	Os12g0169400
HORVU5Hr1G036630	0.79		sen+	Os12g0167900
HORVU5Hr1G037120		-1.13	tol-	Os12g0177500
HORVU5Hr1G037440		2.12	tol+
HORVU5Hr1G037660		-0.92	tol-	Os12g0181600
HORVU5Hr1G038630		-1.31	tol-	Os12g0291200
HORVU5Hr1G038920	1.04		sen+	Os11g0602600
HORVU5Hr1G039850		-0.83	tol-	Os11g0163100
HORVU5Hr1G040000	-0.82	-0.84		Os12g0163400
HORVU5Hr1G040160		-0.94	tol-
HORVU5Hr1G040210		-1	tol-	Os12g0158600
HORVU5Hr1G040740		1.18	tol+	Os11g0147000
HORVU5Hr1G041490		-1.15	tol-	Os09g0338500
HORVU5Hr1G041870		-1.41	tol-	Os09g0346600
HORVU5Hr1G041930		-1.74	tol-	Os12g0149900
HORVU5Hr1G042080	-1.04		sen-	Os11g0151500
HORVU5Hr1G042310	-1.22	-1		Os12g0152700
HORVU5Hr1G042390		-0.81	tol-
HORVU5Hr1G042740		-0.95	tol-	Os11g0145200
HORVU5Hr1G043010		-4.7	tol-	Os12g0141000
HORVU5Hr1G043460		-2.62	tol-
HORVU5Hr1G043600	-0.86		sen-	Os12g0137300
HORVU5Hr1G044920		0.79	tol+	Os05g0531800
HORVU5Hr1G044960		1.1	tol+	Os11g0133800
HORVU5Hr1G045360		-1.32	tol-
HORVU5Hr1G045990		0.7	tol+	Os12g0121300
HORVU5Hr1G046160		-1.36	tol-
HORVU5Hr1G046250	-0.84		sen-	Os12g0118900
HORVU5Hr1G046480	-2.65		sen-	Os12g0115700
HORVU5Hr1G046520		0.96	tol+	Os11g0116000
HORVU5Hr1G047060	1.5		sen+	Os12g0110400
HORVU5Hr1G047150		-2.27	tol-	Os04g0203600
HORVU5Hr1G047730	0.77	0.86
HORVU5Hr1G048240		-1.09	tol-	Os11g0104400
HORVU5Hr1G048300	-1.1		sen-
HORVU5Hr1G048550		0.71	tol+
HORVU5Hr1G048890		0.85	tol+	Os02g0708100
HORVU5Hr1G050560	0.64		sen+	Os09g0115400
HORVU5Hr1G050990		-1.39	tol-	Os12g0291200
HORVU5Hr1G051010		-1.22	tol-	Os12g0291200
HORVU5Hr1G051140		1.57	tol+
HORVU5Hr1G051530	0.71		sen+	Os09g0246200
HORVU5Hr1G052150	4.53		sen+	Os09g0255400
HORVU5Hr1G052310		-2.11	tol-
HORVU5Hr1G052760		-0.99	tol-	Os09g0272000
HORVU5Hr1G053220	-2.35		sen-	Os09g0279300
HORVU5Hr1G053550		0.94	tol+	Os07g0231400
HORVU5Hr1G053950		2.07	tol+	Os09g0294000
HORVU5Hr1G054000	-0.87		sen-	Os09g0296800
HORVU5Hr1G054060		-0.67	tol-	Os09g0297000
HORVU5Hr1G054510		-0.62	tol-	Os09g0306400
HORVU5Hr1G055560	-0.73		sen-
HORVU5Hr1G055850		-1.07	tol-	Os09g0322000
HORVU5Hr1G055920		-0.82	tol-	Os09g0323000
HORVU5Hr1G056100	5.57		sen+
HORVU5Hr1G056130		-1.71	tol-	Os09g0334500
HORVU5Hr1G056670		-1.09	tol-
HORVU5Hr1G057800		-2.21	tol-	Os09g0365900
HORVU5Hr1G058240		1.42	tol+	Os09g0368900
HORVU5Hr1G058300	-1.22	-1.24		Os09g0369400
HORVU5Hr1G059140	-0.85		sen-	Os09g0376300
HORVU5Hr1G059280	5.9		sen+	Os09g0378700
HORVU5Hr1G059410	1.95	2.04		Os09g0379600
HORVU5Hr1G059550		0.71	tol+
HORVU5Hr1G060250		-0.67	tol-	Os09g0394900
HORVU5Hr1G060620	2.05		sen+
HORVU5Hr1G061020	0.8		sen+	Os09g0407600
HORVU5Hr1G061140	0.95	1.08		Os09g0408600
HORVU5Hr1G061150		-1.36	tol-
HORVU5Hr1G061710		-0.79	tol-	Os09g0442600
HORVU5Hr1G061950		-1.84	tol-	Os09g0441400
HORVU5Hr1G062050		-1.06	tol-
HORVU5Hr1G062090	1.06	1.03		Os09g0440300
HORVU5Hr1G062290	2.39		sen+	Os09g0439200
HORVU5Hr1G062300		-2.7	tol-	Os09g0438500
HORVU5Hr1G062410		-1.63	tol-	Os05g0591900
HORVU5Hr1G062450	-2.45		sen-	Os09g0438100
HORVU5Hr1G062490		-1.28	tol-	Os09g0438000
HORVU5Hr1G062680		1.19	tol+
HORVU5Hr1G062890		0.63	tol+
HORVU5Hr1G062940		0.84	tol+	Os09g0434500
HORVU5Hr1G063340		-1.83	tol-	Os09g0432300
HORVU5Hr1G063440		-0.83	tol-	Os09g0431200
HORVU5Hr1G063480		-0.59	tol-	Os09g0431200
HORVU5Hr1G063590	-2.82		sen-	Os07g0178800
HORVU5Hr1G063650		-2.04	tol-	Os07g0178800
HORVU5Hr1G063820		-0.65	tol-	Os09g0426800
HORVU5Hr1G063940	1.86	2.27
HORVU5Hr1G064010		-0.78	tol-	Os09g0426000
HORVU5Hr1G064020		-1.49	tol-	Os09g0425900
HORVU5Hr1G064470		1.88	tol+
HORVU5Hr1G064800		3.48	tol+
HORVU5Hr1G065370	2.03		sen+	Os09g0418000
HORVU5Hr1G065420		-2.67	tol-	Os09g0417600
HORVU5Hr1G065620		-1.46	tol-
HORVU5Hr1G065660	2.11	2.25		Os09g0416200
HORVU5Hr1G065890	-0.88	-0.68		Os09g0413700
HORVU5Hr1G066250		1.59	tol+
HORVU5Hr1G066260		-3.05	tol-
HORVU5Hr1G066280		-1.05	tol-	Os08g0435900
HORVU5Hr1G066360		-0.96	tol-	Os08g0406400
HORVU5Hr1G066490		-0.89	tol-
HORVU5Hr1G066750		-1.54	tol-	Os09g0445500
HORVU5Hr1G067010		-1.13	tol-	Os09g0447000
HORVU5Hr1G067230		-1.32	tol-	Os06g0109300
HORVU5Hr1G067390		1.2	tol+	Os09g0448500
HORVU5Hr1G067750		-1.22	tol-	Os09g0452900
HORVU5Hr1G067800		-0.93	tol-	Os09g0453400
HORVU5Hr1G067810	1.18	1.6		Os09g0453700
HORVU5Hr1G068060		-2.36	tol-	Os09g0454600
HORVU5Hr1G068330		-1.39	tol-	Os09g0457100
HORVU5Hr1G068790		-0.84	tol-	Os03g0821900
HORVU5Hr1G068960	-1.19	-1.69		Os09g0460300
HORVU5Hr1G069310		0.73	tol+
HORVU5Hr1G069750		-3.2	tol-	Os09g0466300
HORVU5Hr1G069900		1.99	tol+	Os09g0468000
HORVU5Hr1G070160		0.53	tol+	Os09g0469400
HORVU5Hr1G070230	-0.91		sen-	Os09g0469950
HORVU5Hr1G070240	1.22		sen+	Os09g0469900
HORVU5Hr1G070290		-0.97	tol-
HORVU5Hr1G070360		-3.48	tol-	Os09g0471200
HORVU5Hr1G070400	3.96		sen+
HORVU5Hr1G070740		0.66	tol+	Os09g0474800
HORVU5Hr1G070880		1.36	tol+	Os09g0475700
HORVU5Hr1G071140		-0.8	tol-	Os09g0478300
HORVU5Hr1G071270	2.11	1.48
HORVU5Hr1G072480		-1.59	tol-
HORVU5Hr1G072520	5.37		sen+
HORVU5Hr1G072760		-1.63	tol-	Os09g0484800
HORVU5Hr1G072770		-4.08	tol-	Os01g0384800
HORVU5Hr1G073170		-0.8	tol-	Os09g0487900
HORVU5Hr1G073380		-0.58	tol-	Os09g0490200
HORVU5Hr1G073950	-0.79	-0.6
HORVU5Hr1G073960	2.13		sen+	Os09g0491868
HORVU5Hr1G074000		-0.71	tol-	Os10g0100300
HORVU5Hr1G074270		-0.91	tol-	Os09g0493800
HORVU5Hr1G074370	1.06		sen+	Os02g0700100
HORVU5Hr1G074900	1.77		sen+	Os12g0543600
HORVU5Hr1G075350		-4.32	tol-
HORVU5Hr1G076060		1.96	tol+	Os09g0505400
HORVU5Hr1G076110	0.85		sen+	Os03g0598200
HORVU5Hr1G076250		-2.67	tol-	Os09g0506000
HORVU5Hr1G077140	1.65	1.97		Os09g0509500
HORVU5Hr1G077450		-1.46	tol-
HORVU5Hr1G077580		-1.27	tol-
HORVU5Hr1G077680		0.8	tol+	Os03g0322000
HORVU5Hr1G077700		-2.12	tol-	Os09g0569800
HORVU5Hr1G077920		-0.91	tol-	Os09g0511600
HORVU5Hr1G078180		-0.71	tol-	Os09g0513600
HORVU5Hr1G080060		-0.8	tol-	Os09g0520200
HORVU5Hr1G080300	-1.86		sen-
HORVU5Hr1G080540	-0.65		sen-	Os09g0525400
HORVU5Hr1G080860		1.32	tol+	Os09g0526700
HORVU5Hr1G081090	0.78	0.9		Os09g0528200
HORVU5Hr1G081190	-1.39	-1.35		Os09g0527900
HORVU5Hr1G081360		0.92	tol+	Os03g0824400
HORVU5Hr1G081500	3.18		sen+	Os09g0532000
HORVU5Hr1G081620	-1.09		sen-	Os09g0532400
HORVU5Hr1G081950		-2.86	tol-	Os09g0533300
HORVU5Hr1G082420	-1.46		sen-	Os03g0592500
HORVU5Hr1G082890		-0.86	tol-	Os03g0571900
HORVU5Hr1G084010	-0.87		sen-	Os01g0819200
HORVU5Hr1G084100		-1.13	tol-	Os05g0318700
HORVU5Hr1G084510	1.5		sen+	Os09g0542000
HORVU5Hr1G084740		-0.99	tol-	Os09g0543100
HORVU5Hr1G084850		2.77	tol+	Os11g0183150
HORVU5Hr1G085070		0.54	tol+	Os09g0544400
HORVU5Hr1G085120	1.08		sen+
HORVU5Hr1G085680		-3.05	tol-	Os09g0545300
HORVU5Hr1G086670	-1.77		sen-	Os09g0548400
HORVU5Hr1G086710	-0.98		sen-	Os09g0548400
HORVU5Hr1G087240		-3.76	tol-
HORVU5Hr1G087410		-1.19	tol-
HORVU5Hr1G087780		-1.35	tol-	Os04g0182875
HORVU5Hr1G087880		-3.35	tol-	Os09g0554300
HORVU5Hr1G087990	-0.81		sen-	Os09g0553600
HORVU5Hr1G088200	-0.86		sen-	Os02g0815700
HORVU5Hr1G088350	-0.74		sen-
HORVU5Hr1G088420		1.96	tol+	Os09g0556700
HORVU5Hr1G088530	1.92	2.29		Os09g0557500
HORVU5Hr1G088760		-0.63	tol-
HORVU5Hr1G088920		-0.7	tol-	Os09g0558900
HORVU5Hr1G089230		-3.15	tol-
HORVU5Hr1G089780		1.42	tol+	Os09g0560700
HORVU5Hr1G089840		-4.53	tol-	Os09g0561600
HORVU5Hr1G089850		-4.39	tol-	Os09g0561600
HORVU5Hr1G092180		1.01	tol+	Os09g0565450
HORVU5Hr1G092290	3.46	1.79	ΔLFC<-1	Os03g0650900
HORVU5Hr1G092310		1.32	tol+
HORVU5Hr1G092760	-0.81		sen-	Os03g0648100
HORVU5Hr1G093160	1.1		sen+	Os12g0481100
HORVU5Hr1G093270	1.27	1.51		Os03g0639700
HORVU5Hr1G093300		-0.57	tol-	Os12g0241100
HORVU5Hr1G093390		0.75	tol+	Os03g0638200
HORVU5Hr1G093860	3.68	-3.28	sen+/tol-	Os03g0739700
HORVU5Hr1G093930		-1.16	tol-	Os03g0807900
HORVU5Hr1G093960		-0.88	tol-	Os03g0741100
HORVU5Hr1G094300		-0.82	tol-	Os03g0743900
HORVU5Hr1G094400	-1.28		sen-	Os03g0744700
HORVU5Hr1G095120		-3.36	tol-
HORVU5Hr1G095130	1.89		sen+	Os03g0749500
HORVU5Hr1G095580		-2.36	tol-	Os06g0582600
HORVU5Hr1G096110		0.76	tol+	Os03g0756500
HORVU5Hr1G096370		-1.28	tol-	Os03g0757900
HORVU5Hr1G097100	0.99		sen+	Os03g0761200
HORVU5Hr1G097270		-2.03	tol-	Os03g0762300
HORVU5Hr1G097560		1.29	tol+	Os03g0764600
HORVU5Hr1G097710		-0.73	tol-	Os03g0765200
HORVU5Hr1G097740		0.97	tol+	Os08g0494400
HORVU5Hr1G098030		-0.74	tol-	Os03g0766800
HORVU5Hr1G098440	1.24		sen+
HORVU5Hr1G098570		1.38	tol+	Os03g0772100
HORVU5Hr1G098640		-2.1	tol-	Os03g0772600
HORVU5Hr1G098690		-0.7	tol-	Os03g0772800
HORVU5Hr1G098720		-1	tol-	Os03g0773000
HORVU5Hr1G098770	1.82	1.43		Os08g0475100
HORVU5Hr1G098780		-0.84	tol-	Os03g0773600
HORVU5Hr1G098820		-0.72	tol-	Os03g0773300
HORVU5Hr1G098960		-0.79	tol-
HORVU5Hr1G098980	-0.86		sen-	Os03g0774300
HORVU5Hr1G099350		-1.04	tol-	Os11g0558300
HORVU5Hr1G099390	5.64		sen+	Os03g0777000
HORVU5Hr1G099410		-1.56	tol-	Os03g0776900
HORVU5Hr1G099670		-0.99	tol-	Os02g0273700
HORVU5Hr1G100910	1.01	0.75		Os03g0780500
HORVU5Hr1G102900		-1.78	tol-
HORVU5Hr1G103180		0.88	tol+	Os03g0784700
HORVU5Hr1G103280		0.49	tol+	Os02g0557500
HORVU5Hr1G103420	3.95		sen+
HORVU5Hr1G103430		-0.92	tol-
HORVU5Hr1G104380	0.77		sen+	Os07g0170300
HORVU5Hr1G104580		-1.6	tol-	Os01g0638000
HORVU5Hr1G104670		-1.36	tol-	Os01g0372400
HORVU5Hr1G104740		-2.1	tol-	Os01g0638000
HORVU5Hr1G104800	3.26		sen+	Os03g0794200
HORVU5Hr1G104960	1.65	1.87		Os02g0311150
HORVU5Hr1G105040	1.21		sen+	Os10g0141900
HORVU5Hr1G105840	2.05	2.17
HORVU5Hr1G106120		-0.65	tol-	Os03g0796900
HORVU5Hr1G106720		0.7	tol+
HORVU5Hr1G107260	0.67	0.83		Os05g0252000
HORVU5Hr1G107290		-1.2	tol-	Os03g0801900
HORVU5Hr1G107540		-1.45	tol-
HORVU5Hr1G108670		-1.72	tol-	Os03g0803600
HORVU5Hr1G108780		0.78	tol+	Os03g0803800
HORVU5Hr1G109190		-3.03	tol-	Os03g0804500
HORVU5Hr1G109260	-2.18		sen-	Os01g0600900
HORVU5Hr1G109360	-2.28	-1.88		Os01g0600900
HORVU5Hr1G109420		-1.09	tol-	Os03g0805400
HORVU5Hr1G109940	-0.93		sen-	Os03g0807900
HORVU5Hr1G110120		-0.7	tol-
HORVU5Hr1G110180		-2.12	tol-
HORVU5Hr1G110280		-0.54	tol-
HORVU5Hr1G110440		-3.82	tol-	Os01g0735300
HORVU5Hr1G110490		1.11	tol+
HORVU5Hr1G110920	-0.85	-1.36
HORVU5Hr1G110940		-1.73	tol-	Os11g0202500
HORVU5Hr1G111240	4.51		sen+	Os04g0197200
HORVU5Hr1G111480	1.2	1.42		Os03g0812000
HORVU5Hr1G111590		-1.41	tol-
HORVU5Hr1G111870		-0.76	tol-	Os01g0550300
HORVU5Hr1G112130		-1.86	tol-	Os08g0105800
HORVU5Hr1G112340		-0.69	tol-	Os03g0818200
HORVU5Hr1G112570		1.4	tol+
HORVU5Hr1G113470	-1.62		sen-
HORVU5Hr1G114070		1.55	tol+	Os05g0361900
HORVU5Hr1G114230	2.49		sen+
HORVU5Hr1G114850		2.05	tol+	Os03g0825300
HORVU5Hr1G115280		1.72	tol+	Os11g0180000
HORVU5Hr1G115980	0.91		sen+	Os03g0831100
HORVU5Hr1G116380	1.14		sen+	Os03g0831700
HORVU5Hr1G117600	1.01	1.28		Os08g0389300
HORVU5Hr1G117670		-1.66	tol-
HORVU5Hr1G117770	1.04		sen+	Os06g0612200
HORVU5Hr1G117910	1.25		sen+	Os03g0835900
HORVU5Hr1G118040		1.41	tol+	Os03g0836800
HORVU5Hr1G118060		-1.23	tol-	Os03g0836300
HORVU5Hr1G118160		0.7	tol+
HORVU5Hr1G118460		-0.97	tol-	Os03g0838100
HORVU5Hr1G118510		-0.84	tol-
HORVU5Hr1G118590		-3.6	tol-	Os03g0838400
HORVU5Hr1G118600		-1.93	tol-	Os04g0374400
HORVU5Hr1G119170		-0.59	tol-
HORVU5Hr1G119250	1.54	1.63
HORVU5Hr1G119270		-0.92	tol-	Os03g0841100
HORVU5Hr1G119520	-4.99	-4.7		Os07g0107800
HORVU5Hr1G120210	-0.65	-0.96		Os05g0280200
HORVU5Hr1G120650	-0.79		sen-	Os03g0844900
HORVU5Hr1G120920		1.7	tol+
HORVU5Hr1G120950		2.38	tol+
HORVU5Hr1G121120		1.1	tol+	Os01g0870201
HORVU5Hr1G121250		0.89	tol+	Os03g0850400
HORVU5Hr1G121570		-0.7	tol-	Os03g0849800
HORVU5Hr1G121940	1.4		sen+	Os03g0850700
HORVU5Hr1G122180	-2.08		sen-	Os10g0370100
HORVU5Hr1G122350	0.96		sen+	Os03g0851100
HORVU5Hr1G122390		-5.21	tol-	Os05g0525800
HORVU5Hr1G123120	1.48	1.65
HORVU5Hr1G124030		1.88	tol+	Os01g0966700
HORVU5Hr1G124390		0.8	tol+
HORVU5Hr1G124630		-1.08	tol-	Os11g0588300
HORVU5Hr1G124750		-1.58	tol-	Os03g0857900
HORVU5Hr1G125220		1.34	tol+
HORVU5Hr1G125400		-3.94	tol-
HORVU5Hr1G125620		0.82	tol+	Os03g0861100
HORVU6Hr1G000070		2.82	tol+	Os12g0428000
HORVU6Hr1G000090		1.39	tol+	Os12g0428000
HORVU6Hr1G000480	1.47		sen+
HORVU6Hr1G000650		-1.08	tol-	Os02g0101500
HORVU6Hr1G001480		-1.99	tol-	Os02g0101000
HORVU6Hr1G001760		0.62	tol+	Os02g0101700
HORVU6Hr1G001950	1.45		sen+	Os02g0710900
HORVU6Hr1G002230		-0.55	tol-	Os02g0104200
HORVU6Hr1G002290		-0.71	tol-
HORVU6Hr1G002390		-5.84	tol-	Os01g0878800
HORVU6Hr1G002630		-1.29	tol-	Os01g0604150
HORVU6Hr1G003020		-1.14	tol-	Os10g0168300
HORVU6Hr1G003160		-0.62	tol-	Os11g0539500
HORVU6Hr1G004300		-2.39	tol-
HORVU6Hr1G004310		-1.52	tol-
HORVU6Hr1G004320		-1.2	tol-	Os04g0367201
HORVU6Hr1G004340		-1.45	tol-
HORVU6Hr1G004420		-2.38	tol-
HORVU6Hr1G004440		-1.56	tol-
HORVU6Hr1G004450		-1.67	tol-
HORVU6Hr1G005360		-1.16	tol-	Os01g0580150
HORVU6Hr1G005420		-5.2	tol-	Os02g0532500
HORVU6Hr1G006310		0.67	tol+
HORVU6Hr1G006860		-0.72	tol-
HORVU6Hr1G009150		-3.19	tol-
HORVU6Hr1G009360	-2.06		sen-	Os02g0240100
HORVU6Hr1G009910		-1.54	tol-	Os10g0410750
HORVU6Hr1G010650		-0.62	tol-
HORVU6Hr1G011120		-1.33	tol-	Os02g0319300
HORVU6Hr1G011180		-0.62	tol-	Os02g0119400
HORVU6Hr1G011650		1.26	tol+	Os01g0364100
HORVU6Hr1G011790		-0.82	tol-	Os07g0176600
HORVU6Hr1G011850		-1.09	tol-	Os02g0575000
HORVU6Hr1G011860		-4.63	tol-	Os02g0575000
HORVU6Hr1G012090	11.53	-6.89	sen+/tol-
HORVU6Hr1G012110	-3.11		sen-
HORVU6Hr1G012170		-3.12	tol-
HORVU6Hr1G012270		-2.31	tol-	Os02g0121700
HORVU6Hr1G012320		-1.25	tol-	Os02g0465900
HORVU6Hr1G012340		1.33	tol+
HORVU6Hr1G012440	0.95		sen+	Os05g0323100
HORVU6Hr1G012630		1.57	tol+	Os11g0209100
HORVU6Hr1G013020		-0.77	tol-	Os02g0119800
HORVU6Hr1G013750		-1.6	tol-	Os01g0222800
HORVU6Hr1G014600		-3.31	tol-
HORVU6Hr1G014650	-1.11	-1.54		Os02g0668000
HORVU6Hr1G014700		-0.78	tol-	Os02g0126400
HORVU6Hr1G014880		-5.7	tol-
HORVU6Hr1G015130	-1.16		sen-	Os02g0128000
HORVU6Hr1G015450		-0.97	tol-	Os02g0130100
HORVU6Hr1G015480		1.84	tol+	Os02g0568200
HORVU6Hr1G015850		1.25	tol+
HORVU6Hr1G016120	-0.67		sen-	Os02g0128800
HORVU6Hr1G016710		-1.6	tol-	Os07g0176500
HORVU6Hr1G016750	-1.9	-0.99
HORVU6Hr1G016850		-5.06	tol-	Os01g0600900
HORVU6Hr1G016880		-2.49	tol-	Os01g0600900
HORVU6Hr1G016890	-2.97	-2.73		Os01g0600900
HORVU6Hr1G016940	-3.18	-3.19
HORVU6Hr1G017220	0.81		sen+	Os06g0310200
HORVU6Hr1G017710	-1.58		sen-
HORVU6Hr1G017860		-2.03	tol-	Os02g0134400
HORVU6Hr1G018070		-2.14	tol-	Os03g0411800
HORVU6Hr1G018160		-1.74	tol-	Os02g0779000
HORVU6Hr1G019380		3.76	tol+	Os07g0566500
HORVU6Hr1G019760		4.11	tol+
HORVU6Hr1G020330		0.96	tol+	Os02g0141100
HORVU6Hr1G020380		1.13	tol+	Os02g0141300
HORVU6Hr1G020420	0.76	0.89
HORVU6Hr1G020570	-0.94		sen-	Os07g0660000
HORVU6Hr1G020670		-0.81	tol-	Os01g0260500
HORVU6Hr1G021750		-0.68	tol-	Os02g0149800
HORVU6Hr1G021780		-1.51	tol-	Os08g0205100
HORVU6Hr1G022280		1.82	tol+	Os02g0151100
HORVU6Hr1G022340		-0.68	tol-	Os02g0150900
HORVU6Hr1G022680		-3.42	tol-	Os12g0159000
HORVU6Hr1G024660	1.29	1.15		Os02g0156400
HORVU6Hr1G024900		0.88	tol+
HORVU6Hr1G025120	-0.67		sen-
HORVU6Hr1G025340		-1.22	tol-
HORVU6Hr1G025350		-1.03	tol-
HORVU6Hr1G025460		-1.26	tol-	Os02g0159200
HORVU6Hr1G027360		-0.79	tol-	Os02g0167100
HORVU6Hr1G027560	1.4	1.41		Os02g0167200
HORVU6Hr1G027930		-3.84	tol-	Os10g0481500
HORVU6Hr1G028150		-1.97	tol-	Os12g0209200
HORVU6Hr1G028790		-1.9	tol-	Os02g0181300
HORVU6Hr1G029540	2.33		sen+	Os02g0179600
HORVU6Hr1G029750	4.07	1.56	ΔLFC<-1	Os02g0179200
HORVU6Hr1G029880	1.01	1.27		Os03g0403100
HORVU6Hr1G030350		-2.98	tol-
HORVU6Hr1G030390		-1.12	tol-	Os02g0177600
HORVU6Hr1G030880		0.96	tol+	Os02g0176100
HORVU6Hr1G031200		0.68	tol+	Os02g0247000
HORVU6Hr1G031360	-0.77		sen-	Os02g0175000
HORVU6Hr1G031480		0.61	tol+	Os02g0173900
HORVU6Hr1G031640		-1.74	tol-	Os02g0173200
HORVU6Hr1G032720		-1.44	tol-	Os02g0198800
HORVU6Hr1G032770	-1.11		sen-	Os02g0198700
HORVU6Hr1G033060		-2.96	tol-	Os02g0532300
HORVU6Hr1G033290	-0.91	-0.73		Os02g0197200
HORVU6Hr1G033310	-1.49	-1.47		Os02g0558600
HORVU6Hr1G033670		1.38	tol+	Os02g0194400
HORVU6Hr1G034380		-1.6	tol-	Os02g0193200
HORVU6Hr1G034490		-1.97	tol-
HORVU6Hr1G034570		-1.66	tol-
HORVU6Hr1G035370		-1.27	tol-	Os02g0188000
HORVU6Hr1G035880		-1.23	tol-	Os02g0186500
HORVU6Hr1G035950		0.53	tol+
HORVU6Hr1G036760		-1.08	tol-
HORVU6Hr1G036950		-1.53	tol-	Os02g0205500
HORVU6Hr1G037940	0.89		sen+
HORVU6Hr1G038250	2.21		sen+	Os02g0201300
HORVU6Hr1G038520		-0.5	tol-	Os02g0107900
HORVU6Hr1G040040		0.76	tol+	Os02g0223700
HORVU6Hr1G040170		-0.73	tol-	Os02g0221900
HORVU6Hr1G041090		0.81	tol+
HORVU6Hr1G042830		1.45	tol+
HORVU6Hr1G043850		0.92	tol+
HORVU6Hr1G046160		-2.8	tol-	Os02g0559300
HORVU6Hr1G048850	1.22	1.74
HORVU6Hr1G049590		3.75	tol+
HORVU6Hr1G050370	-2.97		sen-	Os03g0429900
HORVU6Hr1G050440	-1.06		sen-	Os05g0148700
HORVU6Hr1G051760		0.67	tol+	Os02g0581000
HORVU6Hr1G051860		-1.17	tol-	Os02g0575700
HORVU6Hr1G051990		0.61	tol+
HORVU6Hr1G052420	-1.06	-1.22		Os02g0588500
HORVU6Hr1G053000		1.51	tol+	Os02g0592833
HORVU6Hr1G053710	3.5		sen+	Os02g0595900
HORVU6Hr1G054050	-1.42		sen-	Os02g0598200
HORVU6Hr1G054940	-0.88		sen-	Os02g0603800
HORVU6Hr1G055520		0.73	tol+
HORVU6Hr1G055660		-1.13	tol-	Os02g0607700
HORVU6Hr1G055820		-0.59	tol-	Os02g0608500
HORVU6Hr1G056570	1.01		sen+	Os02g0612900
HORVU6Hr1G056850	1.12	1.57		Os05g0502800
HORVU6Hr1G056910		-2.13	tol-	Os02g0613900
HORVU6Hr1G057680		-2.12	tol-	Os02g0619600
HORVU6Hr1G058290		2.08	tol+
HORVU6Hr1G058840	3.89		sen+	Os05g0427400
HORVU6Hr1G058880		-1.26	tol-
HORVU6Hr1G059420	0.93		sen+	Os02g0633300
HORVU6Hr1G059520		-0.71	tol-	Os02g0555600
HORVU6Hr1G059550		-1.55	tol-	Os02g0634700
HORVU6Hr1G059800	-1.69	-2		Os02g0577300
HORVU6Hr1G059850	-0.76		sen-	Os07g0558200
HORVU6Hr1G059940	-4.25		sen-
HORVU6Hr1G061270		-1.05	tol-	Os02g0647900
HORVU6Hr1G061390		1.87	tol+	Os02g0649300
HORVU6Hr1G061700		1.79	tol+
HORVU6Hr1G062320		-1.02	tol-	Os02g0654000
HORVU6Hr1G062350		1.45	tol+	Os02g0654600
HORVU6Hr1G062380	3.28		sen+	Os02g0654700
HORVU6Hr1G062970		-0.78	tol-	Os02g0657700
HORVU6Hr1G063480	3.36		sen+	Os02g0222100
HORVU6Hr1G063490	1.08		sen+
HORVU6Hr1G064130		-0.96	tol-	Os02g0665500
HORVU6Hr1G064610		0.99	tol+	Os02g0669000
HORVU6Hr1G064620		-0.94	tol-	Os02g0669100
HORVU6Hr1G065210	-1.4		sen-	Os02g0673500
HORVU6Hr1G066470		-0.91	tol-	Os02g0685900
HORVU6Hr1G066840		2.9	tol+	Os02g0689900
HORVU6Hr1G066980		-1.11	tol-
HORVU6Hr1G067060	1.72		sen+	Os02g0692700
HORVU6Hr1G067470		-1.76	tol-	Os02g0696500
HORVU6Hr1G067740	3.17		sen+	Os02g0699000
HORVU6Hr1G067920	4.15		sen+
HORVU6Hr1G068410		-0.54	tol-	Os02g0701600
HORVU6Hr1G068910		-0.86	tol-	Os02g0705100
HORVU6Hr1G069210		1.24	tol+
HORVU6Hr1G070420		-0.88	tol-	Os02g0716500
HORVU6Hr1G071190		-2.78	tol-	Os02g0720600
HORVU6Hr1G071740		-0.84	tol-	Os02g0721700
HORVU6Hr1G071810		-1.59	tol-	Os02g0722400
HORVU6Hr1G072660		-1.46	tol-	Os02g0729100
HORVU6Hr1G072740		-0.68	tol-	Os02g0729400
HORVU6Hr1G073040		0.95	tol+	Os02g0731200
HORVU6Hr1G073280	-2.15	-1.35		Os02g0732200
HORVU6Hr1G073510	1.57		sen+
HORVU6Hr1G074120		-1	tol-	Os04g0655000
HORVU6Hr1G074180		-1.52	tol-	Os02g0736200
HORVU6Hr1G074690		-3.71	tol-	Os07g0141100
[truncated: 396 more rows]

## Sheet: O. sativa
gene ID	logFC.sen	logFC.tol	Class	Rice ortholog
ENSRNA049471102		0.45	tol+	ENSRNA049471102
ENSRNA049476430	0.62		sen+	ENSRNA049476430
ENSRNA049476437	0.9		sen+	ENSRNA049476437
gene-psaC		-0.66	tol-	gene-psaC
Os01g0101200		-0.96	tol-	Os01g0101200
Os01g0101700	0.72	0.71		Os01g0101700
Os01g0102300	0.5		sen+	Os01g0102300
Os01g0102400	1.59	1.26		Os01g0102400
Os01g0102850		-0.75	tol-	Os01g0102850
Os01g0102900	-1.38	-1.56		Os01g0102900
Os01g0103000		-1.03	tol-	Os01g0103000
Os01g0105700	1.74		sen+	Os01g0105700
Os01g0105800	0.97		sen+	Os01g0105800
Os01g0106400	-0.7		sen-	Os01g0106400
Os01g0106900		0.44	tol+	Os01g0106900
Os01g0108400	1.26		sen+	Os01g0108400
Os01g0110500		-1.36	tol-	Os01g0110500
Os01g0111100	-0.64	-2.01	ΔLFC<-1	Os01g0111100
Os01g0111700	-2.61	-1.3	ΔLFC>1	Os01g0111700
Os01g0111900		-1.19	tol-	Os01g0111900
Os01g0114300	-1.04	-0.6		Os01g0114300
Os01g0114550	-1.84		sen-	Os01g0114550
Os01g0115100	-0.78		sen-	Os01g0115100
Os01g0115600	-0.89	0.63	sen-/tol+	Os01g0115600
Os01g0115725	-1.51		sen-	Os01g0115725
Os01g0115900	-0.61		sen-	Os01g0115900
Os01g0116900	-0.48		sen-	Os01g0116900
Os01g0117100	-0.69		sen-	Os01g0117100
Os01g0117200	-1.21		sen-	Os01g0117200
Os01g0117266	-1.65		sen-	Os01g0117266
Os01g0117300	-1.27		sen-	Os01g0117300
Os01g0117450	-1.2		sen-	Os01g0117450
Os01g0117500	-1.14		sen-	Os01g0117500
Os01g0117900	0.69	0.53		Os01g0117900
Os01g0118000		0.52	tol+	Os01g0118000
Os01g0118400	-2.56	-1.61		Os01g0118400
Os01g0122000	1.22		sen+	Os01g0122000
Os01g0123900	-0.53	-0.68		Os01g0123900
Os01g0124000		-1.37	tol-	Os01g0124000
Os01g0125800	1.18		sen+	Os01g0125800
Os01g0127700	-1.27	-0.74		Os01g0127700
Os01g0128300	1.13		sen+	Os01g0128300
Os01g0130200	0.56	1.09		Os01g0130200
Os01g0130400		-1.51	tol-	Os01g0130400
Os01g0131300	0.51	0.5		Os01g0131300
Os01g0132000	-1.55		sen-	Os01g0132000
Os01g0133500	1	0.75		Os01g0133500
Os01g0134700	-2.76	-1.36	ΔLFC>1	Os01g0134700
Os01g0135900	0.42		sen+	Os01g0135900
Os01g0136200	1.71		sen+	Os01g0136200
Os01g0136400	-0.51		sen-	Os01g0136400
Os01g0138500	1.37	1.36		Os01g0138500
Os01g0139200	-0.63		sen-	Os01g0139200
Os01g0141700	0.56		sen+	Os01g0141700
Os01g0142100	0.46		sen+	Os01g0142100
Os01g0142300	0.64	0.85		Os01g0142300
Os01g0142800	-1.18		sen-	Os01g0142800
Os01g0144100		-0.8	tol-	Os01g0144100
Os01g0144900	1.11		sen+	Os01g0144900
Os01g0145200	-1.24		sen-	Os01g0145200
Os01g0149800	0.87		sen+	Os01g0149800
Os01g0151100	-0.47		sen-	Os01g0151100
Os01g0151700	1.03	0.88		Os01g0151700
Os01g0152500	1.01		sen+	Os01g0152500
Os01g0152800	1.45	1.3		Os01g0152800
Os01g0152900	0.67		sen+	Os01g0152900
Os01g0154950	1.38		sen+	Os01g0154950
Os01g0155200	-0.89		sen-	Os01g0155200
Os01g0155500		0.47	tol+	Os01g0155500
Os01g0158200		0.58	tol+	Os01g0158200
Os01g0158900	-1.2	-0.86		Os01g0158900
Os01g0159300	-0.57		sen-	Os01g0159300
Os01g0159400		-0.57	tol-	Os01g0159400
Os01g0159800	2.16		sen+	Os01g0159800
Os01g0161000		-0.63	tol-	Os01g0161000
Os01g0162300	-1.19		sen-	Os01g0162300
Os01g0162800	-1.46		sen-	Os01g0162800
Os01g0163000		1.33	tol+	Os01g0163000
Os01g0166100		0.62	tol+	Os01g0166100
Os01g0166800	1.07		sen+	Os01g0166800
Os01g0167100		0.84	tol+	Os01g0167100
Os01g0170051	0.73		sen+	Os01g0170051
Os01g0171800	0.77	0.66		Os01g0171800
Os01g0172800	0.66		sen+	Os01g0172800
Os01g0174000	0.5		sen+	Os01g0174000
Os01g0174700	1.01		sen+	Os01g0174700
Os01g0175100	-1.15	-0.78		Os01g0175100
Os01g0175700	0.69	1.9	ΔLFC>1	Os01g0175700
Os01g0178000	-0.55		sen-	Os01g0178000
Os01g0178500	0.96	0.95		Os01g0178500
Os01g0179200		-0.57	tol-	Os01g0179200
Os01g0179800	0.48		sen+	Os01g0179800
Os01g0180300		-0.69	tol-	Os01g0180300
Os01g0180800	0.75		sen+	Os01g0180800
Os01g0182100	-0.64		sen-	Os01g0182100
Os01g0182600	-0.58	-0.42		Os01g0182600
Os01g0185200	-0.6		sen-	Os01g0185200
Os01g0186600	-2.61		sen-	Os01g0186600
Os01g0188100	1.31	1.44		Os01g0188100
Os01g0188400	0.46	0.5		Os01g0188400
Os01g0191200	0.47		sen+	Os01g0191200
Os01g0191700	0.49		sen+	Os01g0191700
Os01g0192000	0.73	1.21		Os01g0192000
Os01g0192300	0.74	1.26		Os01g0192300
Os01g0194300	-1.21	-0.58		Os01g0194300
Os01g0197350		-0.72	tol-	Os01g0197350
Os01g0197900	1.41		sen+	Os01g0197900
Os01g0198100		0.95	tol+	Os01g0198100
Os01g0199400	1.14	0.83		Os01g0199400
Os01g0200350	3.41		sen+	Os01g0200350
Os01g0201200		0.69	tol+	Os01g0201200
Os01g0202500	-1.28	-1.07		Os01g0202500
Os01g0206700	2.03		sen+	Os01g0206700
Os01g0207900		1.69	tol+	Os01g0207900
Os01g0208700	0.45		sen+	Os01g0208700
Os01g0210500	0.59		sen+	Os01g0210500
Os01g0210600		-0.54	tol-	Os01g0210600
Os01g0213400		-1.04	tol-	Os01g0213400
Os01g0218032	-0.56		sen-	Os01g0218032
Os01g0218900	0.59		sen+	Os01g0218900
Os01g0221300	0.66		sen+	Os01g0221300
Os01g0221400	-1.01	-1.03		Os01g0221400
Os01g0221600	0.94	1.88		Os01g0221600
Os01g0221700		-0.55	tol-	Os01g0221700
Os01g0222600	-1.31	-1.15		Os01g0222600
Os01g0223700	-0.71		sen-	Os01g0223700
Os01g0227200	0.93	0.62		Os01g0227200
Os01g0227400	0.86	0.67		Os01g0227400
Os01g0227800	0.84		sen+	Os01g0227800
Os01g0228400	2.53		sen+	Os01g0228400
Os01g0228800	-0.54		sen-	Os01g0228800
Os01g0229600	0.6		sen+	Os01g0229600
Os01g0233000	-0.64		sen-	Os01g0233000
Os01g0233900	1.1	1.6		Os01g0233900
Os01g0234900	-0.79		sen-	Os01g0234900
Os01g0235100	1.16	0.87		Os01g0235100
Os01g0235350		0.74	tol+	Os01g0235350
Os01g0237100		-0.53	tol-	Os01g0237100
Os01g0238500	0.83		sen+	Os01g0238500
Os01g0239000	0.48		sen+	Os01g0239000
Os01g0239200		-0.43	tol-	Os01g0239200
Os01g0239300		-1.49	tol-	Os01g0239300
Os01g0241000	2.25		sen+	Os01g0241000
Os01g0242600	0.63	0.7		Os01g0242600
Os01g0243200		0.65	tol+	Os01g0243200
Os01g0246400	1.38	1.8		Os01g0246400
Os01g0246700	-1.26	-0.89		Os01g0246700
Os01g0247500	1.04	1.99		Os01g0247500
Os01g0247600		-0.66	tol-	Os01g0247600
Os01g0248500	-1.1		sen-	Os01g0248500
Os01g0254200	-0.58		sen-	Os01g0254200
Os01g0256500	1.07	0.68		Os01g0256500
Os01g0259300	-0.7		sen-	Os01g0259300
Os01g0259933	1.08		sen+	Os01g0259933
Os01g0261200	-0.61		sen-	Os01g0261200
Os01g0262500		-0.6	tol-	Os01g0262500
Os01g0266800	1.54	1.6		Os01g0266800
Os01g0269500		0.81	tol+	Os01g0269500
Os01g0271700	0.61		sen+	Os01g0271700
Os01g0272850	-0.94	-1.99	ΔLFC<-1	Os01g0272850
Os01g0273800	-1.94		sen-	Os01g0273800
Os01g0276100	-0.45		sen-	Os01g0276100
Os01g0277500		-1	tol-	Os01g0277500
Os01g0277600		0.46	tol+	Os01g0277600
Os01g0278000		-1.33	tol-	Os01g0278000
Os01g0278050	0.59		sen+	Os01g0278050
Os01g0278900		-0.62	tol-	Os01g0278900
Os01g0279000	1.31		sen+	Os01g0279000
Os01g0279100	0.63		sen+	Os01g0279100
Os01g0279300	-0.47		sen-	Os01g0279300
Os01g0279400	-1.22	-1.09		Os01g0279400
Os01g0281000	0.82	0.84		Os01g0281000
Os01g0281100	1.49	1.48		Os01g0281100
Os01g0283300		-0.63	tol-	Os01g0283300
Os01g0283500	0.86		sen+	Os01g0283500
Os01g0284700	0.92		sen+	Os01g0284700
Os01g0284900	2	1.33		Os01g0284900
Os01g0289600	-1.06		sen-	Os01g0289600
Os01g0290000	-0.44	-0.4		Os01g0290000
Os01g0290100	0.51		sen+	Os01g0290100
Os01g0292200	0.85	0.58		Os01g0292200
Os01g0292900	-0.63		sen-	Os01g0292900
Os01g0293000		0.76	tol+	Os01g0293000
Os01g0303000	-0.4	-0.61		Os01g0303000
Os01g0305200	-1.96	-0.84	ΔLFC>1	Os01g0305200
Os01g0305900	0.88		sen+	Os01g0305900
Os01g0306800		-0.6	tol-	Os01g0306800
Os01g0309800	-0.94	-0.76		Os01g0309800
Os01g0310100		0.79	tol+	Os01g0310100
Os01g0311100	-1.68	-1.6		Os01g0311100
Os01g0314800	1.07		sen+	Os01g0314800
Os01g0316500	0.57		sen+	Os01g0316500
Os01g0316600	0.78	0.66		Os01g0316600
Os01g0322700	-0.59	-2.44	ΔLFC<-1	Os01g0322700
Os01g0324400		-1.11	tol-	Os01g0324400
Os01g0327400	-1.82		sen-	Os01g0327400
Os01g0328700		-0.47	tol-	Os01g0328700
Os01g0329400		0.55	tol+	Os01g0329400
Os01g0332100	-0.95	-0.94		Os01g0332100
Os01g0332800		-0.49	tol-	Os01g0332800
Os01g0333001		-0.96	tol-	Os01g0333001
Os01g0339900	-0.63		sen-	Os01g0339900
Os01g0341750	-1.1		sen-	Os01g0341750
Os01g0342800	1.19		sen+	Os01g0342800
Os01g0346250		-1.1	tol-	Os01g0346250
Os01g0347100	1.07	0.93		Os01g0347100
Os01g0350000	-0.66		sen-	Os01g0350000
Os01g0352100	0.99	0.92		Os01g0352100
Os01g0356500	0.7		sen+	Os01g0356500
Os01g0361500	0.42	0.59		Os01g0361500
Os01g0362100	0.71	1.01		Os01g0362100
Os01g0364400	-0.58		sen-	Os01g0364400
Os01g0364800	-1.37	-0.73		Os01g0364800
Os01g0367700	0.56		sen+	Os01g0367700
Os01g0367900	-1.1		sen-	Os01g0367900
Os01g0369200	0.85		sen+	Os01g0369200
Os01g0369700	-0.98		sen-	Os01g0369700
Os01g0369900	-1.09		sen-	Os01g0369900
Os01g0371200	1.28	1.89		Os01g0371200
Os01g0376700	0.49		sen+	Os01g0376700
Os01g0382000	-2.94	-1.28	ΔLFC>1	Os01g0382000
Os01g0382900		-1.39	tol-	Os01g0382900
Os01g0383700	-0.93		sen-	Os01g0383700
Os01g0384800		-0.77	tol-	Os01g0384800
Os01g0389700	-3.27	-2.87		Os01g0389700
Os01g0390600	-0.81		sen-	Os01g0390600
Os01g0390900		0.5	tol+	Os01g0390900
Os01g0498200		0.47	tol+	Os01g0498200
Os01g0501800		-0.68	tol-	Os01g0501800
Os01g0503400		-0.75	tol-	Os01g0503400
Os01g0504100	0.8		sen+	Os01g0504100
Os01g0504500		1.03	tol+	Os01g0504500
Os01g0507300		-0.59	tol-	Os01g0507300
Os01g0507700	0.74		sen+	Os01g0507700
Os01g0508000	1.31	1.48		Os01g0508000
Os01g0508500	0.89	1.53		Os01g0508500
Os01g0510100	-0.48		sen-	Os01g0510100
Os01g0511600		-0.54	tol-	Os01g0511600
Os01g0513100	-0.78		sen-	Os01g0513100
Os01g0515300	-1.64	-0.63	ΔLFC>1	Os01g0515300
Os01g0521400		0.5	tol+	Os01g0521400
Os01g0524700	0.83	0.7		Os01g0524700
Os01g0531500	0.55		sen+	Os01g0531500
Os01g0532300	-2.4	-0.93	ΔLFC>1	Os01g0532300
Os01g0534900	0.75		sen+	Os01g0534900
Os01g0535900	-0.85	-0.74		Os01g0535900
Os01g0536000		0.54	tol+	Os01g0536000
Os01g0537250	-1.7	-0.95		Os01g0537250
Os01g0542000	-0.54	-0.67		Os01g0542000
Os01g0546400	0.74	1.09		Os01g0546400
Os01g0547600	1.54	1.46		Os01g0547600
Os01g0551000	0.48		sen+	Os01g0551000
Os01g0555200	1.3	0.99		Os01g0555200
Os01g0555600		-1.25	tol-	Os01g0555600
Os01g0555800		-1.22	tol-	Os01g0555800
Os01g0556650	0.75	0.87		Os01g0556650
Os01g0556700	0.77	0.87		Os01g0556700
Os01g0557100	-0.8		sen-	Os01g0557100
Os01g0557500	0.59	0.66		Os01g0557500
Os01g0558100	-0.89		sen-	Os01g0558100
Os01g0559600	-0.79	-0.41		Os01g0559600
Os01g0559900	0.59	0.69		Os01g0559900
Os01g0563000	-1.33	-1.24		Os01g0563000
Os01g0564300		0.79	tol+	Os01g0564300
Os01g0565900	-0.87	-0.63		Os01g0565900
Os01g0570800	-1.02	-1.04		Os01g0570800
Os01g0575200	-2.38	-1.35	ΔLFC>1	Os01g0575200
Os01g0579600		-1.48	tol-	Os01g0579600
Os01g0582600		-0.62	tol-	Os01g0582600
Os01g0583100	1.19	1.31		Os01g0583100
Os01g0584300		-0.69	tol-	Os01g0584300
Os01g0584900	-1.75	-0.75		Os01g0584900
Os01g0585100	2.15	1.48		Os01g0585100
Os01g0589000	0.83		sen+	Os01g0589000
Os01g0590700	0.51		sen+	Os01g0590700
Os01g0591000	0.69		sen+	Os01g0591000
Os01g0591300	-0.81		sen-	Os01g0591300
Os01g0594800	2.11		sen+	Os01g0594800
Os01g0595600	-1.15	-0.71		Os01g0595600
Os01g0600900	-0.73	-1.33		Os01g0600900
Os01g0601625	-1.67		sen-	Os01g0601625
Os01g0605700	1.4	1.3		Os01g0605700
Os01g0606900		-1.45	tol-	Os01g0606900
Os01g0607200	-0.97		sen-	Os01g0607200
Os01g0607300		-1.51	tol-	Os01g0607300
Os01g0607600	1.12		sen+	Os01g0607600
Os01g0609300	-1.05		sen-	Os01g0609300
Os01g0609900	-2.44	-1.03	ΔLFC>1	Os01g0609900
Os01g0611300		-1.23	tol-	Os01g0611300
Os01g0612500	1.98	1.82		Os01g0612500
Os01g0613800	-2.7	-1.56	ΔLFC>1	Os01g0613800
Os01g0616900		-0.79	tol-	Os01g0616900
Os01g0617700	0.57		sen+	Os01g0617700
Os01g0619900	-0.73	-0.56		Os01g0619900
Os01g0621300		0.6	tol+	Os01g0621300
Os01g0621900	0.73		sen+	Os01g0621900
Os01g0622600	-0.48		sen-	Os01g0622600
Os01g0627800	0.89		sen+	Os01g0627800
Os01g0628700	-0.62	-0.47		Os01g0628700
Os01g0629400		0.58	tol+	Os01g0629400
Os01g0629750	0.54		sen+	Os01g0629750
Os01g0633200		0.48	tol+	Os01g0633200
Os01g0633400		0.86	tol+	Os01g0633400
Os01g0635200	-1.25	-1.43		Os01g0635200
Os01g0635550		-0.79	tol-	Os01g0635550
Os01g0638600	0.67		sen+	Os01g0638600
Os01g0639600	-0.83		sen-	Os01g0639600
Os01g0639900	0.4	-0.39	sen+/tol-	Os01g0639900
Os01g0642000	2.44	1.7		Os01g0642000
Os01g0644000	1.02		sen+	Os01g0644000
Os01g0645200		0.47	tol+	Os01g0645200
Os01g0645900	-1.07		sen-	Os01g0645900
Os01g0647000	0.67		sen+	Os01g0647000
Os01g0647200		0.45	tol+	Os01g0647200
Os01g0650100	0.96		sen+	Os01g0650100
Os01g0654100	-2.1	-1.44		Os01g0654100
Os01g0654500	-0.6	-0.63		Os01g0654500
Os01g0656200	0.85		sen+	Os01g0656200
Os01g0656400	-1.09	-0.9		Os01g0656400
Os01g0660200	-2.74	-0.78	ΔLFC>1	Os01g0660200
Os01g0660300	-1.15		sen-	Os01g0660300
Os01g0662300		-0.87	tol-	Os01g0662300
Os01g0662700		-0.78	tol-	Os01g0662700
Os01g0663051		-1.53	tol-	Os01g0663051
Os01g0664500	0.69	0.5		Os01g0664500
Os01g0665200	0.97	0.71		Os01g0665200
Os01g0665500	-1		sen-	Os01g0665500
Os01g0665750	-1.23		sen-	Os01g0665750
Os01g0666600	0.43	0.81		Os01g0666600
Os01g0667600	-1.38		sen-	Os01g0667600
Os01g0668600	-0.95		sen-	Os01g0668600
Os01g0670800	0.85		sen+	Os01g0670800
Os01g0672500	-0.55		sen-	Os01g0672500
Os01g0672600	-0.83		sen-	Os01g0672600
Os01g0673700	-0.88	-0.93		Os01g0673700
Os01g0674800	-0.88		sen-	Os01g0674800
Os01g0676200	0.48	-0.57	sen+/tol-	Os01g0676200
Os01g0677900	-2.1	-0.78	ΔLFC>1	Os01g0677900
Os01g0678000	-2.34	-0.94	ΔLFC>1	Os01g0678000
Os01g0678100	-0.75		sen-	Os01g0678100
Os01g0680400	0.52		sen+	Os01g0680400
Os01g0681000	-1.66	-1.84		Os01g0681000
Os01g0681200	-1.07	-0.65		Os01g0681200
Os01g0681700	-1.74	-0.97		Os01g0681700
Os01g0681800	-2.42	-1.64		Os01g0681800
Os01g0685100	0.78	0.94		Os01g0685100
Os01g0686200		1.04	tol+	Os01g0686200
Os01g0686700	1.75	1.88		Os01g0686700
Os01g0687300		0.5	tol+	Os01g0687300
Os01g0689900	-0.54		sen-	Os01g0689900
Os01g0690600	-2.16		sen-	Os01g0690600
Os01g0690800	-1.08		sen-	Os01g0690800
Os01g0691500	0.51		sen+	Os01g0691500
Os01g0693300	-1.22		sen-	Os01g0693300
Os01g0693400	-1.22	-0.67		Os01g0693400
Os01g0694000	-2.45	-1.45		Os01g0694000
Os01g0695100	-0.74	-0.6		Os01g0695100
Os01g0695300		0.53	tol+	Os01g0695300
Os01g0695700	-0.45		sen-	Os01g0695700
Os01g0695800	-2.27	-0.78	ΔLFC>1	Os01g0695800
Os01g0698000	0.56		sen+	Os01g0698000
Os01g0700000	0.66	1.1		Os01g0700000
Os01g0700100	1.07	1.98		Os01g0700100
Os01g0701900	0.64		sen+	Os01g0701900
Os01g0702000		-1.04	tol-	Os01g0702000
Os01g0703400		0.85	tol+	Os01g0703400
Os01g0704100	0.94	2.48	ΔLFC>1	Os01g0704100
Os01g0704300	-0.72	-0.83		Os01g0704300
Os01g0704400	-0.6		sen-	Os01g0704400
Os01g0706000	0.64		sen+	Os01g0706000
Os01g0706400	-0.53		sen-	Os01g0706400
Os01g0706700		1.46	tol+	Os01g0706700
Os01g0708400	-0.78		sen-	Os01g0708400
Os01g0708900	-0.65	-1.03		Os01g0708900
Os01g0710700		-0.91	tol-	Os01g0710700
Os01g0711200	1.13	0.61		Os01g0711200
Os01g0711400		0.47	tol+	Os01g0711400
Os01g0711500		0.92	tol+	Os01g0711500
Os01g0713200	-2.63	-1.96		Os01g0713200
Os01g0714600	-2.3	-1.82		Os01g0714600
Os01g0715400	0.59		sen+	Os01g0715400
Os01g0716400	0.83	0.57		Os01g0716400
Os01g0717000	-0.8	-0.44		Os01g0717000
Os01g0717400	-0.53	-0.62		Os01g0717400
Os01g0719100	0.55		sen+	Os01g0719100
Os01g0719700	0.77	0.73		Os01g0719700
Os01g0719800	0.62	0.72		Os01g0719800
Os01g0720400	1.32	0.67		Os01g0720400
Os01g0720500	-0.53	-2.29	ΔLFC<-1	Os01g0720500
Os01g0720700	1.23		sen+	Os01g0720700
Os01g0721000	0.92		sen+	Os01g0721000
Os01g0721400	1		sen+	Os01g0721400
Os01g0723400	-0.6	-0.66		Os01g0723400
Os01g0725800	0.7	0.66		Os01g0725800
Os01g0726801		-1.87	tol-	Os01g0726801
Os01g0727820	-1.91	-2.03		Os01g0727820
Os01g0729900	-1.08		sen-	Os01g0729900
Os01g0732200	-0.46	-0.62		Os01g0732200
Os01g0733500	1.21		sen+	Os01g0733500
Os01g0734466		1.18	tol+	Os01g0734466
Os01g0734800	-0.95		sen-	Os01g0734800
Os01g0736400	-1.23		sen-	Os01g0736400
Os01g0739200	0.55		sen+	Os01g0739200
Os01g0739400		-0.56	tol-	Os01g0739400
Os01g0739500	-1.08	-1.24		Os01g0739500
Os01g0740300	-1.64	-0.78		Os01g0740300
Os01g0740600		0.7	tol+	Os01g0740600
Os01g0742400	-2.76	-1.55	ΔLFC>1	Os01g0742400
Os01g0743400		-0.51	tol-	Os01g0743400
Os01g0746400	0.93		sen+	Os01g0746400
Os01g0747300		-0.72	tol-	Os01g0747300
Os01g0747400	-0.86		sen-	Os01g0747400
Os01g0747500		-1.08	tol-	Os01g0747500
Os01g0748800	-1.66		sen-	Os01g0748800
Os01g0748900	-0.67		sen-	Os01g0748900
Os01g0749200		-0.41	tol-	Os01g0749200
Os01g0749400	-0.92	-0.51		Os01g0749400
Os01g0749900	-0.54		sen-	Os01g0749900
Os01g0751600	1.22		sen+	Os01g0751600
Os01g0752200	-0.53		sen-	Os01g0752200
Os01g0754100		-0.67	tol-	Os01g0754100
Os01g0755700		-1.45	tol-	Os01g0755700
Os01g0757500	1.34		sen+	Os01g0757500
Os01g0757800	-0.53		sen-	Os01g0757800
Os01g0760900	1.47		sen+	Os01g0760900
Os01g0762300	0.61		sen+	Os01g0762300
Os01g0763200	-0.94		sen-	Os01g0763200
Os01g0763600	0.5		sen+	Os01g0763600
Os01g0763700		-0.51	tol-	Os01g0763700
Os01g0763750	-0.83		sen-	Os01g0763750
Os01g0764800	1.72		sen+	Os01g0764800
Os01g0766900	0.9		sen+	Os01g0766900
Os01g0767600	0.8		sen+	Os01g0767600
Os01g0770000	0.49		sen+	Os01g0770000
Os01g0770700	-0.63	-1.4		Os01g0770700
Os01g0771200	1.01		sen+	Os01g0771200
Os01g0773100	-0.64		sen-	Os01g0773100
Os01g0773200	0.54		sen+	Os01g0773200
Os01g0773700		-0.68	tol-	Os01g0773700
Os01g0775100	0.62	0.88		Os01g0775100
Os01g0777900		1.43	tol+	Os01g0777900
Os01g0778800	-1.83	-0.8	ΔLFC>1	Os01g0778800
Os01g0779100		-1.63	tol-	Os01g0779100
Os01g0780900	0.92	0.7		Os01g0780900
Os01g0782200	-0.48		sen-	Os01g0782200
Os01g0782300	1.31		sen+	Os01g0782300
Os01g0783100		-0.83	tol-	Os01g0783100
Os01g0783200	0.56	0.47		Os01g0783200
Os01g0783500	0.54		sen+	Os01g0783500
Os01g0783800	-0.75		sen-	Os01g0783800
Os01g0793300	1.57		sen+	Os01g0793300
Os01g0793900	-1.14		sen-	Os01g0793900
Os01g0794400	1.52	1.44		Os01g0794400
Os01g0795000	-1.23		sen-	Os01g0795000
Os01g0795832	-1.19	-1.81		Os01g0795832
Os01g0797600	1.18	0.73		Os01g0797600
Os01g0800300	0.69		sen+	Os01g0800300
Os01g0800500	1.15	1.62		Os01g0800500
Os01g0803200		-0.43	tol-	Os01g0803200
Os01g0803300	2.34	1.05	ΔLFC<-1	Os01g0803300
Os01g0805300	0.51	-0.59	sen+/tol-	Os01g0805300
Os01g0805400	-1.35		sen-	Os01g0805400
Os01g0809300	-0.46		sen-	Os01g0809300
Os01g0810300	-0.8	-1.17		Os01g0810300
Os01g0813100		-0.68	tol-	Os01g0813100
Os01g0814400	-0.56		sen-	Os01g0814400
Os01g0815100	0.75		sen+	Os01g0815100
Os01g0818600	-1.8	-1.17		Os01g0818600
Os01g0818700	-1.46	-0.91		Os01g0818700
Os01g0821600	1.79	1.8		Os01g0821600
Os01g0821700	0.48		sen+	Os01g0821700
Os01g0822800		-0.53	tol-	Os01g0822800
Os01g0823300		-0.62	tol-	Os01g0823300
Os01g0823600	0.49	0.54		Os01g0823600
Os01g0824600	0.81	0.88		Os01g0824600
Os01g0824800	-0.7		sen-	Os01g0824800
Os01g0825800	-1.25		sen-	Os01g0825800
Os01g0826400	-3.36	-1.67	ΔLFC>1	Os01g0826400
Os01g0827500	0.5		sen+	Os01g0827500
Os01g0828100		0.59	tol+	Os01g0828100
Os01g0830000	0.52	0.66		Os01g0830000
Os01g0830700	-2.03		sen-	Os01g0830700
Os01g0833000		-0.91	tol-	Os01g0833000
Os01g0833150	0.75		sen+	Os01g0833150
Os01g0833200	0.66		sen+	Os01g0833200
Os01g0833600	1.67	1.79		Os01g0833600
Os01g0834500		-0.58	tol-	Os01g0834500
Os01g0834700	0.42		sen+	Os01g0834700
Os01g0834900	1.87		sen+	Os01g0834900
Os01g0836800	-1.34	-0.66		Os01g0836800
Os01g0837000	-3.05	-2.22		Os01g0837000
Os01g0837300	-0.73		sen-	Os01g0837300
Os01g0837600	-0.65	-0.82		Os01g0837600
Os01g0837800	0.45	0.62		Os01g0837800
Os01g0838350	2.51	1.63		Os01g0838350
Os01g0839500	0.59		sen+	Os01g0839500
Os01g0840100	1.94	0.73	ΔLFC<-1	Os01g0840100
Os01g0840200	0.59	0.6		Os01g0840200
Os01g0841700	-3.61	-1.86	ΔLFC>1	Os01g0841700
Os01g0842600	0.64		sen+	Os01g0842600
Os01g0844000		-0.61	tol-	Os01g0844000
Os01g0846000	0.5		sen+	Os01g0846000
Os01g0846300	1.13	1.09		Os01g0846300
Os01g0846400	1.52	2.16		Os01g0846400
Os01g0846450	0.87	1.5		Os01g0846450
Os01g0846700	1.46	1.29		Os01g0846700
Os01g0847100		-1	tol-	Os01g0847100
Os01g0847700	-0.72		sen-	Os01g0847700
Os01g0847800	-1.23	-0.57		Os01g0847800
Os01g0848200		-0.82	tol-	Os01g0848200
Os01g0849000	2.47		sen+	Os01g0849000
Os01g0850100	-0.56	-0.67		Os01g0850100
Os01g0852200	0.54		sen+	Os01g0852200
Os01g0853800		-0.47	tol-	Os01g0853800
Os01g0856500		-1.12	tol-	Os01g0856500
Os01g0856900		0.58	tol+	Os01g0856900
Os01g0858350	1.59	0.89		Os01g0858350
Os01g0858900	-0.72	-0.67		Os01g0858900
Os01g0860800	-1.01	-1.34		Os01g0860800
Os01g0863300	1.14		sen+	Os01g0863300
Os01g0863400	0.62		sen+	Os01g0863400
Os01g0864200	-1.24	-0.77		Os01g0864200
Os01g0864500	-3.46		sen-	Os01g0864500
Os01g0865100	-1.42	-0.95		Os01g0865100
Os01g0866400	0.67	0.53		Os01g0866400
Os01g0867300	0.95		sen+	Os01g0867300
Os01g0867600	0.54		sen+	Os01g0867600
Os01g0867700	-0.67		sen-	Os01g0867700
Os01g0868000	-1.66	-1.35		Os01g0868000
Os01g0869000	0.45	0.43		Os01g0869000
Os01g0869200	0.58	0.55		Os01g0869200
Os01g0869800	0.47		sen+	Os01g0869800
Os01g0869900	0.62	0.71		Os01g0869900
Os01g0870300	0.61	0.59		Os01g0870300
Os01g0871500	-0.47		sen-	Os01g0871500
Os01g0872500	-1.29		sen-	Os01g0872500
Os01g0873900	-0.46		sen-	Os01g0873900
Os01g0874300	0.99		sen+	Os01g0874300
Os01g0875700	1.16		sen+	Os01g0875700
Os01g0878000	-0.9	-1.13		Os01g0878000
Os01g0879200	-2.57		sen-	Os01g0879200
Os01g0881300		-0.65	tol-	Os01g0881300
Os01g0881500	-0.61		sen-	Os01g0881500
Os01g0881800	0.7		sen+	Os01g0881800
Os01g0881900		-0.58	tol-	Os01g0881900
Os01g0882500		-0.56	tol-	Os01g0882500
Os01g0883800	1.27		sen+	Os01g0883800
Os01g0884300		-0.45	tol-	Os01g0884300
Os01g0884700	0.54		sen+	Os01g0884700
Os01g0885600	0.67		sen+	Os01g0885600
Os01g0886350		-0.97	tol-	Os01g0886350
Os01g0886600		-0.61	tol-	Os01g0886600
Os01g0886900	0.5	0.57		Os01g0886900
Os01g0887100		0.58	tol+	Os01g0887100
Os01g0888500	-0.69	-0.78		Os01g0888500
Os01g0890300		0.97	tol+	Os01g0890300
Os01g0892300	-1.25		sen-	Os01g0892300
Os01g0892500	-2.03	-1.52		Os01g0892500
Os01g0892600	0.92	1.09		Os01g0892600
Os01g0893400	-0.55	-0.57		Os01g0893400
Os01g0894700		-0.45	tol-	Os01g0894700
Os01g0895600	-0.81	-0.69		Os01g0895600
Os01g0896500	0.8		sen+	Os01g0896500
Os01g0897600	0.71	0.9		Os01g0897600
Os01g0898800	0.72	0.97		Os01g0898800
Os01g0899200		0.88	tol+	Os01g0899200
Os01g0899500		0.75	tol+	Os01g0899500
Os01g0901500	0.71		sen+	Os01g0901500
Os01g0901600	2.5	2.27		Os01g0901600
Os01g0905200	-2.09	-1.04	ΔLFC>1	Os01g0905200
Os01g0908100	-0.69		sen-	Os01g0908100
Os01g0908700	-1.02	-0.88		Os01g0908700
Os01g0910900	0.51	0.88		Os01g0910900
Os01g0911200	-0.63		sen-	Os01g0911200
Os01g0911300	0.57	0.45		Os01g0911300
Os01g0912700	0.41		sen+	Os01g0912700
Os01g0915800	-0.72		sen-	Os01g0915800
Os01g0915900	-1.45	0.84	sen-/tol+	Os01g0915900
Os01g0916100		1.12	tol+	Os01g0916100
Os01g0916600	-0.7	-1.09		Os01g0916600
Os01g0918400	1.87	0.72	ΔLFC<-1	Os01g0918400
Os01g0919400	0.4	0.69		Os01g0919400
Os01g0919900	0.66	0.66		Os01g0919900
Os01g0920100		0.8	tol+	Os01g0920100
Os01g0921600	0.46		sen+	Os01g0921600
Os01g0921800	1.27		sen+	Os01g0921800
Os01g0922700	-1.85	-2.37		Os01g0922700
Os01g0925100		-1.52	tol-	Os01g0925100
Os01g0925700	-1.57		sen-	Os01g0925700
Os01g0926700	1.05		sen+	Os01g0926700
Os01g0928000	-0.82		sen-	Os01g0928000
Os01g0928800	-0.49		sen-	Os01g0928800
Os01g0929100		-0.67	tol-	Os01g0929100
Os01g0930000		-0.49	tol-	Os01g0930000
Os01g0930400	-2.49		sen-	Os01g0930400
Os01g0931100	0.5		sen+	Os01g0931100
Os01g0933200		0.53	tol+	Os01g0933200
Os01g0933300	-1.13	-0.98		Os01g0933300
Os01g0933900	-1.27	-1.12		Os01g0933900
Os01g0934400	0.9		sen+	Os01g0934400
Os01g0935500	0.57		sen+	Os01g0935500
Os01g0936600	-1.36		sen-	Os01g0936600
Os01g0938100	0.75		sen+	Os01g0938100
Os01g0940700	-2.08	-1.25		Os01g0940700
Os01g0942900	-0.59		sen-	Os01g0942900
Os01g0943800	-0.55		sen-	Os01g0943800
Os01g0944100	1.03	0.9		Os01g0944100
Os01g0944900	-2.96	-1.59	ΔLFC>1	Os01g0944900
Os01g0945300	-0.84		sen-	Os01g0945300
Os01g0948200	0.66		sen+	Os01g0948200
Os01g0948500	-0.74	-0.75		Os01g0948500
Os01g0949300	-0.68	-1.38		Os01g0949300
Os01g0949500	0.69		sen+	Os01g0949500
Os01g0949700		0.79	tol+	Os01g0949700
Os01g0950900	1.18	0.81		Os01g0950900
Os01g0952800	-1.31		sen-	Os01g0952800
Os01g0955000	1.39		sen+	Os01g0955000
Os01g0955100	-2.69	-2.45		Os01g0955100
Os01g0957200	-1.44	-1.18		Os01g0957200
Os01g0959750	-1.63	-1.16		Os01g0959750
Os01g0960400	-1.12	-0.76		Os01g0960400
Os01g0961000	0.85		sen+	Os01g0961000
Os01g0961200	0.55		sen+	Os01g0961200
Os01g0962700	-2.04	-2.36		Os01g0962700
Os01g0964133	0.74	0.74		Os01g0964133
Os01g0965500	0.91		sen+	Os01g0965500
Os01g0966200		-0.66	tol-	Os01g0966200
Os01g0971000	-0.42	-0.62		Os01g0971000
Os01g0971200	-0.9		sen-	Os01g0971200
Os01g0972000		-1.81	tol-	Os01g0972000
Os01g0973100	-2.54	-0.55	ΔLFC>1	Os01g0973100
Os01g0973150	-3.18	-0.73	ΔLFC>1	Os01g0973150
Os01g0974200	-0.39	-1.13		Os01g0974200
Os01g0974400	-0.66		sen-	Os01g0974400
Os01g0975300	-0.81	-1.23		Os01g0975300
Os01g0975900	1.25	1.22		Os01g0975900
Os01g0978400		-0.78	tol-	Os01g0978400
Os01g0978500		-0.6	tol-	Os01g0978500
Os02g0101500	0.41		sen+	Os02g0101500
Os02g0102300		-0.98	tol-	Os02g0102300
Os02g0102900	0.84		sen+	Os02g0102900
Os02g0105000		0.54	tol+	Os02g0105000
Os02g0106100	4.88		sen+	Os02g0106100
Os02g0110600		-1.28	tol-	Os02g0110600
Os02g0111600	-1.37		sen-	Os02g0111600
Os02g0114300	1.69	1.08		Os02g0114300
Os02g0114400	1.39	1.3		Os02g0114400
Os02g0115700	-1.28	-1.86		Os02g0115700
Os02g0115900	-0.93	-0.8		Os02g0115900
Os02g0118200	-1.06	-0.63		Os02g0118200
Os02g0118875		1.02	tol+	Os02g0118875
Os02g0120000		-0.53	tol-	Os02g0120000
Os02g0121100	-0.53	-0.77		Os02g0121100
Os02g0121300		-0.39	tol-	Os02g0121300
Os02g0121500	-0.66		sen-	Os02g0121500
Os02g0122600	-0.88	-0.73		Os02g0122600
Os02g0122800	-0.86	-0.51		Os02g0122800
Os02g0125566	1.15		sen+	Os02g0125566
Os02g0125700	0.81		sen+	Os02g0125700
Os02g0126400	-1.86	-1.08		Os02g0126400
Os02g0128200		-0.72	tol-	Os02g0128200
Os02g0129300	-0.4	-0.47		Os02g0129300
Os02g0129700	-0.59		sen-	Os02g0129700
Os02g0129800	-1.15	-0.82		Os02g0129800
Os02g0132500	-0.77		sen-	Os02g0132500
Os02g0134000	-0.93		sen-	Os02g0134000
Os02g0134300	0.67	1.07		Os02g0134300
Os02g0135200	-1.19		sen-	Os02g0135200
Os02g0135850		-1.49	tol-	Os02g0135850
Os02g0135900	0.44	0.45		Os02g0135900
Os02g0136150	1.24		sen+	Os02g0136150
Os02g0137200	0.47		sen+	Os02g0137200
Os02g0137700	0.68	0.6		Os02g0137700
Os02g0139100	0.86		sen+	Os02g0139100
Os02g0140500	1.11	1.42		Os02g0140500
Os02g0140800	2.36		sen+	Os02g0140800
Os02g0150900		0.52	tol+	Os02g0150900
Os02g0151100		0.76	tol+	Os02g0151100
Os02g0152200	-0.72		sen-	Os02g0152200
Os02g0152500	-0.56		sen-	Os02g0152500
Os02g0152900		-0.5	tol-	Os02g0152900
Os02g0153900	-1.38	-1.05		Os02g0153900
Os02g0154200	-1.52		sen-	Os02g0154200
Os02g0156600	-1.68		sen-	Os02g0156600
Os02g0162600	1.85	1.41		Os02g0162600
Os02g0165100	-1.2		sen-	Os02g0165100
Os02g0166200	-0.44		sen-	Os02g0166200
Os02g0167600	-1.06	-1.57		Os02g0167600
Os02g0168100	1.35	0.87		Os02g0168100
Os02g0169400		-1	tol-	Os02g0169400
Os02g0170000		-0.49	tol-	Os02g0170000
Os02g0170900		1.1	tol+	Os02g0170900
Os02g0173100	-0.46	-0.82		Os02g0173100
Os02g0173200	-2.11	-2.16		Os02g0173200
Os02g0173800	-0.9		sen-	Os02g0173800
Os02g0173900		0.44	tol+	Os02g0173900
Os02g0174300	0.67		sen+	Os02g0174300
Os02g0175600		-0.61	tol-	Os02g0175600
Os02g0176000	1.22		sen+	Os02g0176000
Os02g0176100	-0.6		sen-	Os02g0176100
Os02g0177600		1.28	tol+	Os02g0177600
Os02g0177700		-0.78	tol-	Os02g0177700
Os02g0178400	-0.66	-0.46		Os02g0178400
Os02g0178600	1.64		sen+	Os02g0178600
Os02g0180000	-0.84	-0.99		Os02g0180000
Os02g0180700	-1.18		sen-	Os02g0180700
Os02g0180800		0.61	tol+	Os02g0180800
Os02g0181300	-0.57	-1.02		Os02g0181300
Os02g0181900	1.29	0.85		Os02g0181900
Os02g0187500	0.44		sen+	Os02g0187500
Os02g0187800	-2.08	0.6	sen-/tol+	Os02g0187800
Os02g0189000	0.79		sen+	Os02g0189000
Os02g0190300		0.94	tol+	Os02g0190300
Os02g0192700	0.7		sen+	Os02g0192700
Os02g0193800	-0.73		sen-	Os02g0193800
Os02g0194700	1.66	1.35		Os02g0194700
Os02g0196300	0.53		sen+	Os02g0196300
Os02g0197125	0.45		sen+	Os02g0197125
Os02g0197200	0.73		sen+	Os02g0197200
Os02g0197700		0.78	tol+	Os02g0197700
Os02g0198000		-1.3	tol-	Os02g0198000
Os02g0198200		1.13	tol+	Os02g0198200
Os02g0198600	-0.5		sen-	Os02g0198600
Os02g0200300	-1.16		sen-	Os02g0200300
Os02g0201300	0.85	1.02		Os02g0201300
Os02g0201500	0.83		sen+	Os02g0201500
Os02g0202200		0.89	tol+	Os02g0202200
Os02g0203500	-0.93		sen-	Os02g0203500
Os02g0205500	-1.81		sen-	Os02g0205500
Os02g0206700	1.06	1.17		Os02g0206700
Os02g0208100	-0.57		sen-	Os02g0208100
Os02g0208400	-1.25		sen-	Os02g0208400
Os02g0209300	-2.78	-1.77	ΔLFC>1	Os02g0209300
Os02g0212500		1.6	tol+	Os02g0212500
Os02g0215700	-1.89	-1.15		Os02g0215700
Os02g0216300	-0.71	-0.43		Os02g0216300
Os02g0216600		1.16	tol+	Os02g0216600
Os02g0219800	0.89	0.77		Os02g0219800
Os02g0219900		-0.47	tol-	Os02g0219900
Os02g0221600	-0.8		sen-	Os02g0221600
Os02g0222100	-0.7		sen-	Os02g0222100
Os02g0227200	-1.09		sen-	Os02g0227200
Os02g0227700	-2.04		sen-	Os02g0227700
Os02g0227900	-2.19		sen-	Os02g0227900
Os02g0228300	-0.45	0.42	sen-/tol+	Os02g0228300
Os02g0229900	1.31		sen+	Os02g0229900
Os02g0234450		0.86	tol+	Os02g0234450
Os02g0245800	-1.26		sen-	Os02g0245800
Os02g0247000		1.02	tol+	Os02g0247000
Os02g0247800	1.33	1.16		Os02g0247800
Os02g0249200		-2.08	tol-	Os02g0249200
Os02g0249300		-1.59	tol-	Os02g0249300
Os02g0251800		-1.99	tol-	Os02g0251800
Os02g0254550	-0.96		sen-	Os02g0254550
Os02g0254600	-0.76	-0.61		Os02g0254600
Os02g0255900		-1.33	tol-	Os02g0255900
Os02g0257300		-0.9	tol-	Os02g0257300
Os02g0257400	1.06	-0.93	sen+/tol-	Os02g0257400
Os02g0258000		0.95	tol+	Os02g0258000
Os02g0258800	3.07	2.69		Os02g0258800
Os02g0258900	-0.61	-0.54		Os02g0258900
Os02g0259100		-0.49	tol-	Os02g0259100
Os02g0259600		-0.84	tol-	Os02g0259600
Os02g0259850	2.27	1.88		Os02g0259850
Os02g0259900	2.36	1.71		Os02g0259900
Os02g0274100	-0.5		sen-	Os02g0274100
Os02g0274700	-0.46		sen-	Os02g0274700
Os02g0274900	0.51	0.64		Os02g0274900
Os02g0275200	-1.5	-1.06		Os02g0275200
Os02g0276500	0.41		sen+	Os02g0276500
Os02g0277700	-0.62		sen-	Os02g0277700
Os02g0282000	-2.18		sen-	Os02g0282000
Os02g0284600		-0.46	tol-	Os02g0284600
Os02g0284800	1.26		sen+	Os02g0284800
Os02g0285800		0.45	tol+	Os02g0285800
Os02g0285900	0.77	0.9		Os02g0285900
Os02g0297200		1.7	tol+	Os02g0297200
Os02g0299300	-1.59	-1.92		Os02g0299300
Os02g0302700	1.26		sen+	Os02g0302700
Os02g0306401	0.43		sen+	Os02g0306401
Os02g0310200	-0.66	-0.54		Os02g0310200
Os02g0312500	0.8		sen+	Os02g0312500
Os02g0313700	-0.87		sen-	Os02g0313700
Os02g0314300	0.44	0.57		Os02g0314300
Os02g0314600	-2.05	-1.09		Os02g0314600
Os02g0318450	-0.44		sen-	Os02g0318450
Os02g0318500	-0.5		sen-	Os02g0318500
Os02g0318600	-0.64		sen-	Os02g0318600
Os02g0323000	0.73		sen+	Os02g0323000
Os02g0323600		0.75	tol+	Os02g0323600
Os02g0327000	-0.71		sen-	Os02g0327000
Os02g0437200	-0.98	-0.69		Os02g0437200
Os02g0437300	-0.81	-0.69		Os02g0437300
Os02g0456500		0.67	tol+	Os02g0456500
Os02g0460200	0.61	0.54		Os02g0460200
Os02g0463401	2.15		sen+	Os02g0463401
Os02g0465500	0.62		sen+	Os02g0465500
Os02g0465900	-0.5		sen-	Os02g0465900
Os02g0468400	0.51	0.53		Os02g0468400
Os02g0469600	-0.42		sen-	Os02g0469600
Os02g0470400	-0.51		sen-	Os02g0470400
Os02g0470600	-0.72		sen-	Os02g0470600
Os02g0471500	0.58	0.83		Os02g0471500
Os02g0472700	-0.84		sen-	Os02g0472700
Os02g0475300	-0.78	-0.59		Os02g0475300
Os02g0481700	0.54		sen+	Os02g0481700
Os02g0481900	-0.56	-0.48		Os02g0481900
Os02g0484975	1.03	1.09		Os02g0484975
Os02g0489525		0.59	tol+	Os02g0489525
Os02g0491400	0.83		sen+	Os02g0491400
Os02g0498300		0.79	tol+	Os02g0498300
Os02g0498666	1.38	1.51		Os02g0498666
Os02g0504050	0.89		sen+	Os02g0504050
Os02g0507400		-0.55	tol-	Os02g0507400
Os02g0508500	-0.5		sen-	Os02g0508500
Os02g0510200	0.51		sen+	Os02g0510200
Os02g0510600	0.49		sen+	Os02g0510600
Os02g0514326	2.72		sen+	Os02g0514326
Os02g0518000	-0.99	-0.82		Os02g0518000
Os02g0521300	-0.48		sen-	Os02g0521300
Os02g0523500	-0.52		sen-	Os02g0523500
Os02g0523800		-0.87	tol-	Os02g0523800
Os02g0525100	0.87		sen+	Os02g0525100
Os02g0525600	-0.61	-0.74		Os02g0525600
Os02g0525900	-1.46	-1.78		Os02g0525900
Os02g0526400	-2.39	-0.99	ΔLFC>1	Os02g0526400
Os02g0527200	2.57	1.78		Os02g0527200
Os02g0529700	0.92		sen+	Os02g0529700
Os02g0530100	-1.13	-2.72	ΔLFC<-1	Os02g0530100
Os02g0530600	0.67		sen+	Os02g0530600
Os02g0532300	-0.72		sen-	Os02g0532300
Os02g0532800	0.54		sen+	Os02g0532800
Os02g0533700		-1.4	tol-	Os02g0533700
Os02g0533800	-0.52	-0.68		Os02g0533800
Os02g0535000	0.57		sen+	Os02g0535000
Os02g0539500		-0.83	tol-	Os02g0539500
Os02g0539600		-0.44	tol-	Os02g0539600
Os02g0541300	-0.8	-0.88		Os02g0541300
Os02g0541325	-0.69	-0.6		Os02g0541325
Os02g0543000	-0.74		sen-	Os02g0543000
Os02g0552550	1.42		sen+	Os02g0552550
Os02g0553200		-0.4	tol-	Os02g0553200
Os02g0554100	0.8		sen+	Os02g0554100
Os02g0554800	0.78		sen+	Os02g0554800
Os02g0555700	1	1.33		Os02g0555700
Os02g0556100	0.5		sen+	Os02g0556100
Os02g0556800	0.5		sen+	Os02g0556800
Os02g0556900	0.61	0.66		Os02g0556900
Os02g0557500		0.51	tol+	Os02g0557500
Os02g0558100		1.06	tol+	Os02g0558100
Os02g0558500	0.54		sen+	Os02g0558500
Os02g0561900	-1.57	-1.61		Os02g0561900
Os02g0562300	-0.44		sen-	Os02g0562300
Os02g0566300	-0.68		sen-	Os02g0566300
Os02g0568600	-2.32	-1.16	ΔLFC>1	Os02g0568600
Os02g0571300	-1.55	-1.08		Os02g0571300
Os02g0571800	-0.84		sen-	Os02g0571800
Os02g0572400	-0.97		sen-	Os02g0572400
Os02g0572900	-0.63		sen-	Os02g0572900
Os02g0573200	0.53		sen+	Os02g0573200
Os02g0574500	1.74	2.1		Os02g0574500
Os02g0575200	1.21		sen+	Os02g0575200
Os02g0575500	0.9	0.64		Os02g0575500
Os02g0575700	-0.91		sen-	Os02g0575700
Os02g0577100	-0.73	-0.78		Os02g0577100
Os02g0578000	1.08		sen+	Os02g0578000
Os02g0578400		-1.31	tol-	Os02g0578400
Os02g0579800	-1.69	-1.1		Os02g0579800
Os02g0580900	2.19	1.43		Os02g0580900
Os02g0581100		-1.34	tol-	Os02g0581100
Os02g0584700	-3.02	-1.95	ΔLFC>1	Os02g0584700
Os02g0584800	-1.83	-1.59		Os02g0584800
Os02g0585200	-3.03	-1.2	ΔLFC>1	Os02g0585200
Os02g0586400	-0.53		sen-	Os02g0586400
Os02g0588500	1.08		sen+	Os02g0588500
Os02g0588700	0.63		sen+	Os02g0588700
Os02g0589000	1.42	0.79		Os02g0589000
Os02g0589400	0.67		sen+	Os02g0589400
Os02g0590400	1.02	0.81		Os02g0590400
Os02g0591900	0.52	0.51		Os02g0591900
Os02g0592300		0.52	tol+	Os02g0592300
Os02g0593100	-1.27		sen-	Os02g0593100
Os02g0593700	-0.58		sen-	Os02g0593700
Os02g0594900		-0.85	tol-	Os02g0594900
Os02g0595100	-0.6	-0.47		Os02g0595100
Os02g0595400	0.53		sen+	Os02g0595400
Os02g0595700	0.63		sen+	Os02g0595700
Os02g0595800	0.65		sen+	Os02g0595800
Os02g0596000		-1.27	tol-	Os02g0596000
Os02g0597300		0.73	tol+	Os02g0597300
Os02g0598800	-2.09		sen-	Os02g0598800
Os02g0599100	1.28		sen+	Os02g0599100
Os02g0599151	0.83		sen+	Os02g0599151
Os02g0603600		-1.64	tol-	Os02g0603600
Os02g0603800	0.96	1.66		Os02g0603800
Os02g0603900	1.4	1.25		Os02g0603900
Os02g0604100	0.49		sen+	Os02g0604100
Os02g0605900	-1.63	-2		Os02g0605900
Os02g0606200	0.74		sen+	Os02g0606200
Os02g0608000	-1.2	-1.1		Os02g0608000
Os02g0608550	-0.83	-1.27		Os02g0608550
Os02g0609900	-3.32	-1.33	ΔLFC>1	Os02g0609900
Os02g0610500	0.69		sen+	Os02g0610500
Os02g0610800	0.51		sen+	Os02g0610800
Os02g0612000	0.81		sen+	Os02g0612000
Os02g0613900	-1.5	-1.62		Os02g0613900
Os02g0614100	-0.56		sen-	Os02g0614100
Os02g0617100		-1.19	tol-	Os02g0617100
Os02g0617300		-0.6	tol-	Os02g0617300
Os02g0617800	1.07	0.83		Os02g0617800
Os02g0618200		-0.47	tol-	Os02g0618200
Os02g0621300		1.3	tol+	Os02g0621300
Os02g0621800	0.89		sen+	Os02g0621800
Os02g0622500	1.46	0.9		Os02g0622500
Os02g0625300	-0.88	-1.29		Os02g0625300
Os02g0625500	-0.46		sen-	Os02g0625500
Os02g0626100	-0.76	1.14	sen-/tol+	Os02g0626100
Os02g0626400	-0.88	1.61	sen-/tol+	Os02g0626400
Os02g0627100		2.06	tol+	Os02g0627100
Os02g0629200	1.4	0.78		Os02g0629200
Os02g0632800	-2.6	-0.61	ΔLFC>1	Os02g0632800
Os02g0632900	-2.87	-1.25	ΔLFC>1	Os02g0632900
Os02g0633066	-2.68	-0.59	ΔLFC>1	Os02g0633066
Os02g0635000		-0.57	tol-	Os02g0635000
Os02g0635200	0.64		sen+	Os02g0635200
Os02g0636600	-1.54	-1.15		Os02g0636600
Os02g0637900		0.5	tol+	Os02g0637900
Os02g0639100	-0.62	-0.96		Os02g0639100
Os02g0640800	0.44		sen+	Os02g0640800
Os02g0643000	1.11	1.38		Os02g0643000
Os02g0643500	0.45		sen+	Os02g0643500
Os02g0644000	0.49	0.51		Os02g0644000
Os02g0644100	0.81		sen+	Os02g0644100
Os02g0645100	-0.61		sen-	Os02g0645100
Os02g0649400	0.82	1.15		Os02g0649400
Os02g0649800	-0.65		sen-	Os02g0649800
Os02g0649900		0.82	tol+	Os02g0649900
Os02g0652000		1	tol+	Os02g0652000
Os02g0652600		-0.76	tol-	Os02g0652600
Os02g0653800	-0.79		sen-	Os02g0653800
Os02g0653900	0.9		sen+	Os02g0653900
Os02g0654700	-2.15	-2.34		Os02g0654700
Os02g0655200	2.43	1.28	ΔLFC<-1	Os02g0655200
Os02g0658500	0.65		sen+	Os02g0658500
Os02g0662700		-0.82	tol-	Os02g0662700
Os02g0663900	-1.82		sen-	Os02g0663900
Os02g0666200	1.13	0.86		Os02g0666200
Os02g0666250	1.48	1.17		Os02g0666250
Os02g0668000	1.73		sen+	Os02g0668000
Os02g0668700	1.33		sen+	Os02g0668700
Os02g0669000	1.27		sen+	Os02g0669000
Os02g0669100	1.88	1.08		Os02g0669100
Os02g0670400		0.8	tol+	Os02g0670400
Os02g0670500	-0.88		sen-	Os02g0670500
Os02g0670900	-0.81	-0.79		Os02g0670900
Os02g0671200	-0.65	-0.74		Os02g0671200
Os02g0671400	0.52	0.76		Os02g0671400
Os02g0672700		-0.48	tol-	Os02g0672700
Os02g0673500	-1.12	-0.89		Os02g0673500
Os02g0675800	0.86	1.12		Os02g0675800
Os02g0678200	0.59	0.55		Os02g0678200
Os02g0680700		0.51	tol+	Os02g0680700
Os02g0681000	0.8		sen+	Os02g0681000
Os02g0681200	-0.74	-1.53		Os02g0681200
Os02g0681700		-0.96	tol-	Os02g0681700
Os02g0687200		-1.14	tol-	Os02g0687200
Os02g0687900	1.75		sen+	Os02g0687900
Os02g0693000	0.91		sen+	Os02g0693000
Os02g0693500	0.47	0.67		Os02g0693500
Os02g0694201	-1.07		sen-	Os02g0694201
Os02g0694600		1.1	tol+	Os02g0694600
Os02g0695700		-0.76	tol-	Os02g0695700
Os02g0695800	-0.63	-0.87		Os02g0695800
Os02g0697400	0.88	1.62		Os02g0697400
Os02g0699300		0.53	tol+	Os02g0699300
Os02g0700400	1.02	1.02		Os02g0700400
Os02g0700500		-0.95	tol-	Os02g0700500
Os02g0701700	0.61	0.93		Os02g0701700
Os02g0702000	0.53		sen+	Os02g0702000
Os02g0702800	0.53	0.44		Os02g0702800
Os02g0703300	-0.72		sen-	Os02g0703300
Os02g0703900	-0.7		sen-	Os02g0703900
Os02g0704300	-0.52		sen-	Os02g0704300
Os02g0704900		-0.46	tol-	Os02g0704900
Os02g0704966	0.73		sen+	Os02g0704966
Os02g0706400	-0.57		sen-	Os02g0706400
Os02g0708200	-0.63		sen-	Os02g0708200
Os02g0709000	-1.19	1.52	sen-/tol+	Os02g0709000
Os02g0709600	2.08	1.6		Os02g0709600
Os02g0710900	-1.3		sen-	Os02g0710900
Os02g0711400	0.65		sen+	Os02g0711400
Os02g0714100	0.85		sen+	Os02g0714100
Os02g0715400	1.06		sen+	Os02g0715400
Os02g0716500	0.46		sen+	Os02g0716500
Os02g0717600	-0.82		sen-	Os02g0717600
Os02g0718600	-1.09		sen-	Os02g0718600
Os02g0719700	1.28		sen+	Os02g0719700
Os02g0719800	-0.52		sen-	Os02g0719800
Os02g0720900	0.78	0.57		Os02g0720900
Os02g0722500		0.6	tol+	Os02g0722500
Os02g0724850	1.52		sen+	Os02g0724850
Os02g0725000		0.92	tol+	Os02g0725000
Os02g0726300	-0.65	-0.61		Os02g0726300
Os02g0727100		-0.51	tol-	Os02g0727100
Os02g0729400	0.77	0.45		Os02g0729400
Os02g0730300	-1.25		sen-	Os02g0730300
Os02g0731200		0.49	tol+	Os02g0731200
Os02g0731300	1.34	0.6		Os02g0731300
Os02g0731500		-1.63	tol-	Os02g0731500
Os02g0734600	-0.94	-0.81		Os02g0734600
Os02g0736200		0.69	tol+	Os02g0736200
Os02g0738200		-1.53	tol-	Os02g0738200
Os02g0738900	-0.65		sen-	Os02g0738900
Os02g0739400	-1.25		sen-	Os02g0739400
Os02g0740300		0.51	tol+	Os02g0740300
Os02g0740700	-1.05		sen-	Os02g0740700
Os02g0743700		-0.69	tol-	Os02g0743700
Os02g0744000		-0.87	tol-	Os02g0744000
Os02g0744900	0.5		sen+	Os02g0744900
Os02g0745100		-0.78	tol-	Os02g0745100
Os02g0749300		-0.52	tol-	Os02g0749300
Os02g0749800		-0.53	tol-	Os02g0749800
Os02g0750100		-0.75	tol-	Os02g0750100
Os02g0750600	-0.64		sen-	Os02g0750600
Os02g0751600		-0.57	tol-	Os02g0751600
Os02g0752000	-0.66	-0.66		Os02g0752000
Os02g0753300	0.91		sen+	Os02g0753300
Os02g0753800	1.01		sen+	Os02g0753800
Os02g0754300		-1.1	tol-	Os02g0754300
Os02g0754900	0.46		sen+	Os02g0754900
Os02g0757700	1.28	0.91		Os02g0757700
Os02g0757900	0.47		sen+	Os02g0757900
Os02g0758000	2.31		sen+	Os02g0758000
Os02g0759400	2.22		sen+	Os02g0759400
Os02g0759500	0.92		sen+	Os02g0759500
Os02g0759900	0.65	0.78		Os02g0759900
Os02g0760000	0.82		sen+	Os02g0760000
Os02g0762100		-0.51	tol-	Os02g0762100
Os02g0763200	-0.56		sen-	Os02g0763200
Os02g0766600		-0.43	tol-	Os02g0766600
Os02g0766700	1.44	1.15		Os02g0766700
Os02g0768300		1.86	tol+	Os02g0768300
Os02g0769800	-2	-1		Os02g0769800
Os02g0770700		0.96	tol+	Os02g0770700
Os02g0771600		-0.81	tol-	Os02g0771600
Os02g0773200	2.03	1.21		Os02g0773200
Os02g0773500	-1.22	-1.97		Os02g0773500
Os02g0774100	-0.87	-1.15		Os02g0774100
Os02g0775300	-0.75		sen-	Os02g0775300
Os02g0778400	-0.98	-1.37		Os02g0778400
Os02g0779000	1.72		sen+	Os02g0779000
Os02g0779200	-0.59	-0.74		Os02g0779200
Os02g0779500	0.81		sen+	Os02g0779500
Os02g0782300	0.91		sen+	Os02g0782300
Os02g0782500	3.28	2.51		Os02g0782500
Os02g0782600		0.65	tol+	Os02g0782600
Os02g0782700	-0.51	-0.45		Os02g0782700
Os02g0783625	-0.93		sen-	Os02g0783625
Os02g0787300	-0.71	-0.74		Os02g0787300
Os02g0787600	-1.54		sen-	Os02g0787600
Os02g0788500	0.58		sen+	Os02g0788500
Os02g0788800	0.65		sen+	Os02g0788800
Os02g0791700	0.76	1.19		Os02g0791700
Os02g0792100		0.61	tol+	Os02g0792100
Os02g0792800	0.61		sen+	Os02g0792800
Os02g0793700		-0.46	tol-	Os02g0793700
Os02g0794400	0.43		sen+	Os02g0794400
Os02g0797500	0.46		sen+	Os02g0797500
Os02g0797600	0.57		sen+	Os02g0797600
Os02g0798100	-0.67		sen-	Os02g0798100
Os02g0798200	0.5		sen+	Os02g0798200
Os02g0799300	1.1	0.82		Os02g0799300
Os02g0799600	-0.62		sen-	Os02g0799600
Os02g0799700	-0.77	-0.98		Os02g0799700
Os02g0804100		-0.76	tol-	Os02g0804100
Os02g0805800	0.43	0.42		Os02g0805800
Os02g0806350	-0.86	-0.71		Os02g0806350
Os02g0806600	-0.46		sen-	Os02g0806600
Os02g0807100	0.48		sen+	Os02g0807100
Os02g0809800	0.82		sen+	Os02g0809800
Os02g0810600		-1.03	tol-	Os02g0810600
Os02g0813500	-0.49		sen-	Os02g0813500
Os02g0813800	0.78		sen+	Os02g0813800
Os02g0814000	0.62		sen+	Os02g0814000
Os02g0814400		-0.49	tol-	Os02g0814400
Os02g0815300	0.41		sen+	Os02g0815300
Os02g0815700	1.97		sen+	Os02g0815700
Os02g0816600	0.81	1.04		Os02g0816600
Os02g0816700	0.93		sen+	Os02g0816700
Os02g0816900	-0.45		sen-	Os02g0816900
Os02g0817700	-0.49		sen-	Os02g0817700
Os02g0817900		0.43	tol+	Os02g0817900
Os02g0818000	-0.66		sen-	Os02g0818000
Os02g0818900		-2.08	tol-	Os02g0818900
Os02g0819600	-1		sen-	Os02g0819600
Os02g0819700	-0.85		sen-	Os02g0819700
Os02g0820000	-0.48		sen-	Os02g0820000
Os02g0822500	-0.42		sen-	Os02g0822500
Os02g0823100	1.26	1.63		Os02g0823100
Os02g0823400		-0.68	tol-	Os02g0823400
Os02g0823900	1.04	1.18		Os02g0823900
Os02g0826100	-0.57		sen-	Os02g0826100
Os02g0827400	1.6		sen+	Os02g0827400
Os02g0827600		-0.63	tol-	Os02g0827600
Os02g0829850	0.82	0.81		Os02g0829850
Os02g0830300		0.68	tol+	Os02g0830300
Os02g0833300		-0.78	tol-	Os02g0833300
Os03g0100200	1.06		sen+	Os03g0100200
Os03g0102600		-1.08	tol-	Os03g0102600
Os03g0103200	-0.84		sen-	Os03g0103200
Os03g0103300	-1.04		sen-	Os03g0103300
Os03g0103400	-1.34	-1.24		Os03g0103400
Os03g0104800		0.93	tol+	Os03g0104800
Os03g0106000	0.61		sen+	Os03g0106000
Os03g0107700	-1.48	-1.46		Os03g0107700
Os03g0108000		-0.87	tol-	Os03g0108000
Os03g0109300	0.98		sen+	Os03g0109300
Os03g0109800	0.59	0.56		Os03g0109800
Os03g0110300	-0.84	-0.53		Os03g0110300
Os03g0113700	1.15	0.63		Os03g0113700
Os03g0114800		-0.84	tol-	Os03g0114800
Os03g0115100	-0.62		sen-	Os03g0115100
Os03g0115400	-0.58		sen-	Os03g0115400
Os03g0118600	0.58		sen+	Os03g0118600
Os03g0119300	1.85	1.57		Os03g0119300
Os03g0120300		-1.07	tol-	Os03g0120300
Os03g0120900	-1.22	-1.42		Os03g0120900
Os03g0122200		-0.56	tol-	Os03g0122200
Os03g0122500	1.36		sen+	Os03g0122500
Os03g0123600	-0.57		sen-	Os03g0123600
Os03g0123800		-0.9	tol-	Os03g0123800
Os03g0125000		-0.57	tol-	Os03g0125000
Os03g0125100	1.09	1.28		Os03g0125100
Os03g0126825	0.68		sen+	Os03g0126825
Os03g0127600		-1.1	tol-	Os03g0127600
Os03g0128800	0.77		sen+	Os03g0128800
Os03g0129100		-0.58	tol-	Os03g0129100
Os03g0129300	0.66		sen+	Os03g0129300
Os03g0129400		-2.02	tol-	Os03g0129400
Os03g0130300	2.97		sen+	Os03g0130300
Os03g0132900	-1.67		sen-	Os03g0132900
Os03g0133000	-2.42	-0.96	ΔLFC>1	Os03g0133000
Os03g0133400	-2.05	-1.29		Os03g0133400
Os03g0133900	0.55		sen+	Os03g0133900
Os03g0135300		-0.63	tol-	Os03g0135300
Os03g0135400	-0.74	-0.95		Os03g0135400
Os03g0136500	-0.96		sen-	Os03g0136500
Os03g0136800	0.63		sen+	Os03g0136800
Os03g0136900	-0.49	-0.47		Os03g0136900
Os03g0137800	1.46		sen+	Os03g0137800
Os03g0138000	-0.68		sen-	Os03g0138000
Os03g0138700	-2.05	-1.26		Os03g0138700
Os03g0140650	1.25		sen+	Os03g0140650
Os03g0141200	1.66	1.17		Os03g0141200
Os03g0142800		0.52	tol+	Os03g0142800
Os03g0143300	-0.48		sen-	Os03g0143300
Os03g0145900	-1.93	-1.4		Os03g0145900
Os03g0146000	0.76	0.53		Os03g0146000
Os03g0146100	1.25	0.81		Os03g0146100
Os03g0146200	1.78	1.47		Os03g0146200
Os03g0146300		-1.14	tol-	Os03g0146300
Os03g0147400		0.51	tol+	Os03g0147400
Os03g0148700	-1.08	-0.52		Os03g0148700
Os03g0149300	-2.02	-2.06		Os03g0149300
Os03g0150600	-2.1	-1.15		Os03g0150600
Os03g0152000	-1.81	-1.21		Os03g0152000
Os03g0153100	1.99		sen+	Os03g0153100
Os03g0154100	-1.31		sen-	Os03g0154100
Os03g0157900	-0.48		sen-	Os03g0157900
Os03g0159100	1.05	0.92		Os03g0159100
Os03g0160400	-0.88		sen-	Os03g0160400
Os03g0161500	0.55		sen+	Os03g0161500
Os03g0161900	0.73		sen+	Os03g0161900
Os03g0162000		-1.09	tol-	Os03g0162000
Os03g0163200	0.78		sen+	Os03g0163200
Os03g0163300	0.44		sen+	Os03g0163300
Os03g0163500	-0.88		sen-	Os03g0163500
Os03g0169600	-0.64		sen-	Os03g0169600
Os03g0169900	-0.62	-0.63		Os03g0169900
Os03g0170900	1.15	0.77		Os03g0170900
Os03g0172100		-2.27	tol-	Os03g0172100
Os03g0173700	-0.55		sen-	Os03g0173700
Os03g0174900	0.59		sen+	Os03g0174900
Os03g0175200		1.02	tol+	Os03g0175200
Os03g0176700	0.8	0.96		Os03g0176700
Os03g0176800		0.7	tol+	Os03g0176800
Os03g0178100	0.48		sen+	Os03g0178100
Os03g0178200		-0.55	tol-	Os03g0178200
Os03g0178400	1.21	1.05		Os03g0178400
Os03g0178500	1.24		sen+	Os03g0178500
Os03g0180300		0.49	tol+	Os03g0180300
Os03g0181800	0.78		sen+	Os03g0181800
Os03g0182800	-1.8		sen-	Os03g0182800
Os03g0187100		0.45	tol+	Os03g0187100
Os03g0187300	0.64	0.72		Os03g0187300
Os03g0187600	-0.72		sen-	Os03g0187600
Os03g0188100	1.14		sen+	Os03g0188100
Os03g0189400	-0.93		sen-	Os03g0189400
Os03g0189600		0.45	tol+	Os03g0189600
Os03g0190000		-0.8	tol-	Os03g0190000
Os03g0192000	0.61		sen+	Os03g0192000
Os03g0192700		0.83	tol+	Os03g0192700
Os03g0193000	-0.46		sen-	Os03g0193000
Os03g0194900	-1.35	-1.74		Os03g0194900
Os03g0195300	0.81	-0.74	sen+/tol-	Os03g0195300
Os03g0196400	-0.81	1.3	sen-/tol+	Os03g0196400
Os03g0196600	-0.99	-0.96		Os03g0196600
Os03g0196900	0.61		sen+	Os03g0196900
Os03g0197000	1.36	1.35		Os03g0197000
Os03g0197050	1.86	1.54		Os03g0197050
Os03g0197100	0.69	0.7		Os03g0197100
Os03g0197175		1.56	tol+	Os03g0197175
Os03g0197200		1.89	tol+	Os03g0197200
Os03g0197300	1.35		sen+	Os03g0197300
Os03g0198300		0.5	tol+	Os03g0198300
Os03g0202001	0.91		sen+	Os03g0202001
Os03g0203200		-0.74	tol-	Os03g0203200
Os03g0203700	-2.58		sen-	Os03g0203700
Os03g0207400	-1.88		sen-	Os03g0207400
Os03g0210500		1.22	tol+	Os03g0210500
Os03g0212400	-1.1		sen-	Os03g0212400
Os03g0213100	-1.12	-1.32		Os03g0213100
Os03g0214200		0.67	tol+	Os03g0214200
Os03g0215000	-0.94		sen-	Os03g0215000
Os03g0217000		-0.54	tol-	Os03g0217000
Os03g0218300	-0.45		sen-	Os03g0218300
Os03g0218500	1.94	1.08		Os03g0218500
Os03g0219500	0.54		sen+	Os03g0219500
Os03g0219900		-0.56	tol-	Os03g0219900
Os03g0221800	0.49	0.55		Os03g0221800
Os03g0223100	0.52		sen+	Os03g0223100
Os03g0225500		0.49	tol+	Os03g0225500
Os03g0225700	-1.16		sen-	Os03g0225700
Os03g0227400	1.19	1.21		Os03g0227400
Os03g0227700	-0.6		sen-	Os03g0227700
Os03g0228200	0.46	0.66		Os03g0228200
Os03g0230300	0.8		sen+	Os03g0230300
Os03g0230500	0.5	0.59		Os03g0230500
Os03g0232800	0.98		sen+	Os03g0232800
Os03g0233000	0.73		sen+	Os03g0233000
Os03g0235900		0.71	tol+	Os03g0235900
Os03g0237000	-0.5		sen-	Os03g0237000
Os03g0237500	1.14		sen+	Os03g0237500
Os03g0238300		-0.56	tol-	Os03g0238300
Os03g0238600	2.36	1.77		Os03g0238600
Os03g0241200	0.52		sen+	Os03g0241200
Os03g0243100		-0.66	tol-	Os03g0243100
Os03g0245700	-0.74	-1.04		Os03g0245700
Os03g0246500	1.54		sen+	Os03g0246500
Os03g0246800	-0.46		sen-	Os03g0246800
Os03g0247300		0.59	tol+	Os03g0247300
Os03g0249100	1.07		sen+	Os03g0249100
Os03g0249400		-0.66	tol-	Os03g0249400
Os03g0249700	0.55		sen+	Os03g0249700
Os03g0251350	-0.97	-1.45		Os03g0251350
Os03g0252100	0.93		sen+	Os03g0252100
Os03g0252800	-0.57		sen-	Os03g0252800
Os03g0254000	1.38		sen+	Os03g0254000
Os03g0254200		0.52	tol+	Os03g0254200
Os03g0254250		0.73	tol+	Os03g0254250
Os03g0254800	-0.5		sen-	Os03g0254800
Os03g0255100	1.62	0.94		Os03g0255100
Os03g0255500	-1.18	-0.82		Os03g0255500
Os03g0257600	0.94		sen+	Os03g0257600
Os03g0261100		-0.65	tol-	Os03g0261100
Os03g0261500		0.45	tol+	Os03g0261500
Os03g0261800		0.7	tol+	Os03g0261800
Os03g0263700		-0.45	tol-	Os03g0263700
Os03g0264000	0.66		sen+	Os03g0264000
Os03g0264400	-1.49	-0.99		Os03g0264400
Os03g0265400		-0.71	tol-	Os03g0265400
Os03g0265600	1.02	0.63		Os03g0265600
Os03g0265800		-0.59	tol-	Os03g0265800
Os03g0265900	-2.19	-2.49		Os03g0265900
Os03g0266300	3.2	1.48	ΔLFC<-1	Os03g0266300
Os03g0266800	0.71		sen+	Os03g0266800
Os03g0266900	2.99	1.37	ΔLFC<-1	Os03g0266900
Os03g0267000	3.14	1.27	ΔLFC<-1	Os03g0267000
Os03g0268200	0.78	0.62		Os03g0268200
Os03g0268600	1.55	1.69		Os03g0268600
Os03g0268900	0.52		sen+	Os03g0268900
Os03g0269700	0.97		sen+	Os03g0269700
Os03g0270000	1.69		sen+	Os03g0270000
Os03g0270600	-0.73		sen-	Os03g0270600
Os03g0271500	0.5		sen+	Os03g0271500
Os03g0272900	0.61		sen+	Os03g0272900
Os03g0273800	1.26	0.91		Os03g0273800
Os03g0274000	-0.6		sen-	Os03g0274000
Os03g0275450		1.26	tol+	Os03g0275450
Os03g0276500		-0.55	tol-	Os03g0276500
Os03g0277300	4.16	2.56	ΔLFC<-1	Os03g0277300
Os03g0278300	-0.56	-0.44		Os03g0278300
Os03g0278900	0.44		sen+	Os03g0278900
Os03g0279200	0.72		sen+	Os03g0279200
Os03g0279950		-1.42	tol-	Os03g0279950
Os03g0280400	-1.57	-1.85		Os03g0280400
Os03g0283200	-1.31	-1.59		Os03g0283200
Os03g0283400		-1.13	tol-	Os03g0283400
Os03g0283600	0.44		sen+	Os03g0283600
Os03g0284400		-0.79	tol-	Os03g0284400
Os03g0285800	-2.42	-1.86		Os03g0285800
Os03g0286300	-0.93	-0.51		Os03g0286300
Os03g0287100	0.61	0.89		Os03g0287100
Os03g0288300	-0.56		sen-	Os03g0288300
Os03g0289200	-0.55		sen-	Os03g0289200
Os03g0289400		-0.86	tol-	Os03g0289400
Os03g0290500		0.47	tol+	Os03g0290500
Os03g0291500		-2.14	tol-	Os03g0291500
Os03g0292200	0.66		sen+	Os03g0292200
Os03g0292900	1.01		sen+	Os03g0292900
Os03g0293000	1.43	0.73		Os03g0293000
Os03g0293100	0.73		sen+	Os03g0293100
Os03g0296700	0.94		sen+	Os03g0296700
Os03g0297600	-2.05	-2.3		Os03g0297600
Os03g0298300	0.73		sen+	Os03g0298300
Os03g0299800	-1.05		sen-	Os03g0299800
Os03g0300600		-0.71	tol-	Os03g0300600
Os03g0302200	-0.44		sen-	Os03g0302200
Os03g0302500	-0.88		sen-	Os03g0302500
Os03g0303100	1.14		sen+	Os03g0303100
Os03g0305000	0.9		sen+	Os03g0305000
Os03g0305600	1.92	2.5		Os03g0305600
Os03g0306700	-1.67		sen-	Os03g0306700
Os03g0306800	0.65		sen+	Os03g0306800
Os03g0306900	0.45		sen+	Os03g0306900
Os03g0311300	0.38		sen+	Os03g0311300
Os03g0314700	0.48		sen+	Os03g0314700
Os03g0316200	3.24	1.88	ΔLFC<-1	Os03g0316200
Os03g0319000	-2.11	-0.95	ΔLFC>1	Os03g0319000
Os03g0319300	-1.04	-0.53		Os03g0319300
Os03g0322200	-1.3		sen-	Os03g0322200
Os03g0323100		-0.8	tol-	Os03g0323100
Os03g0323500		0.63	tol+	Os03g0323500
Os03g0324600	-1.86	-1.37		Os03g0324600
Os03g0324900	0.91		sen+	Os03g0324900
Os03g0325400	1.21		sen+	Os03g0325400
Os03g0326000	-0.86		sen-	Os03g0326000
Os03g0326100		-0.73	tol-	Os03g0326100
Os03g0326300		0.6	tol+	Os03g0326300
Os03g0326500	0.43	0.71		Os03g0326500
Os03g0326600		0.55	tol+	Os03g0326600
Os03g0327100	-0.85		sen-	Os03g0327100
Os03g0327600	1.4		sen+	Os03g0327600
Os03g0327800		0.68	tol+	Os03g0327800
Os03g0328000		0.9	tol+	Os03g0328000
Os03g0329700	-1.36	-0.59		Os03g0329700
Os03g0331700	-1.06		sen-	Os03g0331700
Os03g0332100	-1.48	-1.27		Os03g0332100
Os03g0332400	0.44		sen+	Os03g0332400
Os03g0332600	0.88		sen+	Os03g0332600
Os03g0332700	0.45		sen+	Os03g0332700
Os03g0333400	0.49	-0.82	sen+/tol-	Os03g0333400
Os03g0335200	-2.29	-1.34		Os03g0335200
Os03g0336000	0.76		sen+	Os03g0336000
Os03g0336500	0.81		sen+	Os03g0336500
Os03g0337500		1.21	tol+	Os03g0337500
Os03g0337600		-0.42	tol-	Os03g0337600
Os03g0339700	-1.53	-1.5		Os03g0339700
Os03g0339900	-0.8	-0.87		Os03g0339900
Os03g0341300	1.28	0.81		Os03g0341300
Os03g0343400	0.46		sen+	Os03g0343400
Os03g0343900		-1.09	tol-	Os03g0343900
Os03g0345200		-0.54	tol-	Os03g0345200
Os03g0345700	-0.89	-0.92		Os03g0345700
Os03g0345901	-0.78	-0.74		Os03g0345901
Os03g0346800	0.55		sen+	Os03g0346800
Os03g0348200	0.59	1.2		Os03g0348200
Os03g0348800	-0.48		sen-	Os03g0348800
Os03g0351100	-0.46		sen-	Os03g0351100
Os03g0351200	0.48		sen+	Os03g0351200
Os03g0351300	2.66	2.1		Os03g0351300
Os03g0353400	-0.57	-0.42		Os03g0353400
Os03g0355100		-0.6	tol-	Os03g0355100
Os03g0356300		-0.51	tol-	Os03g0356300
Os03g0356400	0.6		sen+	Os03g0356400
Os03g0356582	0.93		sen+	Os03g0356582
Os03g0363200	1.1		sen+	Os03g0363200
Os03g0364400	-0.57		sen-	Os03g0364400
Os03g0365250		-1.43	tol-	Os03g0365250
Os03g0366000	0.89		sen+	Os03g0366000
Os03g0367900	0.48		sen+	Os03g0367900
Os03g0374400	-0.61		sen-	Os03g0374400
Os03g0374575	0.68		sen+	Os03g0374575
Os03g0375200	1.12	1.53		Os03g0375200
Os03g0376600		-0.69	tol-	Os03g0376600
Os03g0379400	1.16		sen+	Os03g0379400
Os03g0381300	0.49		sen+	Os03g0381300
Os03g0385400	0.8		sen+	Os03g0385400
Os03g0386000	1.33	1.44		Os03g0386000
Os03g0387900	0.42	0.55		Os03g0387900
Os03g0388432	-1.25		sen-	Os03g0388432
Os03g0388500	-1.02	-0.6		Os03g0388500
Os03g0388900	-1.25	-0.68		Os03g0388900
Os03g0389700	1.24		sen+	Os03g0389700
Os03g0391700		-0.76	tol-	Os03g0391700
Os03g0392250		0.64	tol+	Os03g0392250
Os03g0393700		-0.85	tol-	Os03g0393700
Os03g0395000	0.65		sen+	Os03g0395000
Os03g0395300	-0.62		sen-	Os03g0395300
Os03g0398600	-0.96		sen-	Os03g0398600
Os03g0399800	1.54		sen+	Os03g0399800
Os03g0399900	1.34	1.66		Os03g0399900
Os03g0401100	0.58	0.8		Os03g0401100
Os03g0405100	0.53		sen+	Os03g0405100
Os03g0405500	0.64		sen+	Os03g0405500
Os03g0408300		-0.48	tol-	Os03g0408300
Os03g0409100	-0.61	-0.79		Os03g0409100
Os03g0411300	-0.96	-0.74		Os03g0411300
Os03g0411800	-1.73	-1.23		Os03g0411800
Os03g0412400	-1.82	-1.15		Os03g0412400
Os03g0412800	-0.69		sen-	Os03g0412800
Os03g0412900		0.47	tol+	Os03g0412900
Os03g0413000		-0.85	tol-	Os03g0413000
Os03g0415200	-1.34		sen-	Os03g0415200
Os03g0416500	1.6	1.35		Os03g0416500
Os03g0417700	1.17	1.04		Os03g0417700
Os03g0422800	-1.71		sen-	Os03g0422800
Os03g0425100	-0.61		sen-	Os03g0425100
Os03g0426350		-0.73	tol-	Os03g0426350
Os03g0426800	0.48		sen+	Os03g0426800
Os03g0426900	0.88	0.74		Os03g0426900
Os03g0429000	-1.83		sen-	Os03g0429000
Os03g0431100	-0.52	-0.97		Os03g0431100
Os03g0431800		0.46	tol+	Os03g0431800
Os03g0436300	1.32		sen+	Os03g0436300
Os03g0437600	0.86		sen+	Os03g0437600
Os03g0440900	-0.85	-0.55		Os03g0440900
Os03g0448600	-0.68		sen-	Os03g0448600
Os03g0452300		-0.54	tol-	Os03g0452300
Os03g0556200	-0.8		sen-	Os03g0556200
Os03g0563300		-0.54	tol-	Os03g0563300
Os03g0567100		-1	tol-	Os03g0567100
Os03g0568500	-0.84		sen-	Os03g0568500
Os03g0572250		-0.58	tol-	Os03g0572250
Os03g0572900		0.57	tol+	Os03g0572900
Os03g0574900	-0.49		sen-	Os03g0574900
Os03g0575700		0.6	tol+	Os03g0575700
Os03g0580200	-1.72	-0.79		Os03g0580200
Os03g0582000	-1.79	-2.17		Os03g0582000
Os03g0582200	-0.97	-0.55		Os03g0582200
Os03g0583800	0.61	0.65		Os03g0583800
Os03g0584050		-0.57	tol-	Os03g0584050
Os03g0586400	-0.88	-1.6		Os03g0586400
Os03g0586500	-0.52	-0.65		Os03g0586500
Os03g0592500		-0.73	tol-	Os03g0592500
Os03g0595800	-0.64	-0.83		Os03g0595800
Os03g0599000	-0.77		sen-	Os03g0599000
Os03g0599800	-1.32	-0.63		Os03g0599800
Os03g0602300		0.85	tol+	Os03g0602300
Os03g0603600	-2.08	-1.12		Os03g0603600
Os03g0604566		-0.8	tol-	Os03g0604566
Os03g0605300	0.63		sen+	Os03g0605300
Os03g0607200	2.31	1.14	ΔLFC<-1	Os03g0607200
Os03g0607400	1.39	1.13		Os03g0607400
Os03g0609500	1.6		sen+	Os03g0609500
Os03g0609800	-1.06		sen-	Os03g0609800
Os03g0616400	-1.16	-0.73		Os03g0616400
Os03g0622500	-0.55	0.5	sen-/tol+	Os03g0622500
Os03g0622600		-1.08	tol-	Os03g0622600
Os03g0625300	1.17		sen+	Os03g0625300
Os03g0626500	0.99	1.22		Os03g0626500
Os03g0626600		1.09	tol+	Os03g0626600
Os03g0626700	1.89	1.72		Os03g0626700
Os03g0628800	-1.6	-1.7		Os03g0628800
Os03g0634000		-0.57	tol-	Os03g0634000
Os03g0634400		-0.79	tol-	Os03g0634400
Os03g0635000	1.08		sen+	Os03g0635000
Os03g0638200	1.2	0.75		Os03g0638200
Os03g0639300	0.84	0.73		Os03g0639300
Os03g0639600		-0.63	tol-	Os03g0639600
Os03g0641250	-1.49		sen-	Os03g0641250
Os03g0644400		-0.46	tol-	Os03g0644400
Os03g0644600	1.52		sen+	Os03g0644600
Os03g0647600		0.81	tol+	Os03g0647600
Os03g0648300	0.7		sen+	Os03g0648300
Os03g0649000		0.78	tol+	Os03g0649000
Os03g0650200	1.78		sen+	Os03g0650200
Os03g0654600	0.59		sen+	Os03g0654600
Os03g0654800		-0.55	tol-	Os03g0654800
Os03g0655400		-0.57	tol-	Os03g0655400
Os03g0657400		-1.86	tol-	Os03g0657400
Os03g0659300	0.95		sen+	Os03g0659300
Os03g0660000		-0.53	tol-	Os03g0660000
Os03g0660050		-0.73	tol-	Os03g0660050
Os03g0661300	1.7	1.6		Os03g0661300
Os03g0663400	-3.98	-1.35	ΔLFC>1	Os03g0663400
Os03g0663700	-1.49	-1.14		Os03g0663700
Os03g0664800	-2.36	-1.7		Os03g0664800
Os03g0665200	1.49		sen+	Os03g0665200
Os03g0665700	2.21	1.02	ΔLFC<-1	Os03g0665700
Os03g0666700	1.06		sen+	Os03g0666700
Os03g0668400		0.95	tol+	Os03g0668400
Os03g0670700		-1.08	tol-	Os03g0670700
Os03g0673600		-0.61	tol-	Os03g0673600
Os03g0673700	-0.96	-0.9		Os03g0673700
Os03g0678400		-0.58	tol-	Os03g0678400
Os03g0679700	-1.17	-1.64		Os03g0679700
Os03g0682100	-1.11	-0.72		Os03g0682100
Os03g0684400	1.3	1.41		Os03g0684400
Os03g0684700		0.75	tol+	Os03g0684700
Os03g0685200	1.41		sen+	Os03g0685200
Os03g0685300	0.66		sen+	Os03g0685300
Os03g0685700		0.51	tol+	Os03g0685700
Os03g0690500	1.32		sen+	Os03g0690500
Os03g0692700	0.62		sen+	Os03g0692700
Os03g0695425		-0.54	tol-	Os03g0695425
Os03g0696300	0.43	0.55		Os03g0696300
Os03g0699300		-0.48	tol-	Os03g0699300
Os03g0700700	-0.76		sen-	Os03g0700700
Os03g0701100	2.46	0.96	ΔLFC<-1	Os03g0701100
Os03g0701200	-0.74	-0.65		Os03g0701200
Os03g0701400	0.6	0.52		Os03g0701400
Os03g0703000	0.88		sen+	Os03g0703000
Os03g0703200	-0.79	-0.65		Os03g0703200
Os03g0703300	0.95	0.53		Os03g0703300
Os03g0704100	0.41		sen+	Os03g0704100
Os03g0704200		1	tol+	Os03g0704200
Os03g0708500		-0.79	tol-	Os03g0708500
Os03g0709000		-0.47	tol-	Os03g0709000
Os03g0709300	2.6		sen+	Os03g0709300
Os03g0710000	-0.84		sen-	Os03g0710000
Os03g0711100	0.94		sen+	Os03g0711100
Os03g0711150	1.63		sen+	Os03g0711150
Os03g0712400	0.75		sen+	Os03g0712400
Os03g0712600	0.96		sen+	Os03g0712600
Os03g0712700		0.68	tol+	Os03g0712700
Os03g0713000	-0.78	-1.19		Os03g0713000
Os03g0713100		-0.81	tol-	Os03g0713100
Os03g0713200		-0.93	tol-	Os03g0713200
Os03g0717000		0.82	tol+	Os03g0717000
Os03g0717700		0.44	tol+	Os03g0717700
Os03g0717900	1.01	1.02		Os03g0717900
Os03g0718000		0.76	tol+	Os03g0718000
Os03g0718200	0.89		sen+	Os03g0718200
Os03g0718800		-1.47	tol-	Os03g0718800
Os03g0719000	0.97		sen+	Os03g0719000
Os03g0719400	1.7		sen+	Os03g0719400
Os03g0719900	-0.84		sen-	Os03g0719900
Os03g0720800		-1.11	tol-	Os03g0720800
Os03g0721300	1.57		sen+	Os03g0721300
Os03g0722200		-0.6	tol-	Os03g0722200
Os03g0724700		0.63	tol+	Os03g0724700
Os03g0725200	-2.58		sen-	Os03g0725200
Os03g0726100		-0.43	tol-	Os03g0726100
Os03g0726200	-0.9	-0.88		Os03g0726200
Os03g0726500	-0.58		sen-	Os03g0726500
Os03g0728200	0.93		sen+	Os03g0728200
Os03g0728500	1.07		sen+	Os03g0728500
Os03g0729000	2.42	2.33		Os03g0729000
Os03g0729100	0.52		sen+	Os03g0729100
Os03g0730000	1.26	0.93		Os03g0730000
Os03g0731900	0.71	0.93		Os03g0731900
Os03g0736300	0.66		sen+	Os03g0736300
Os03g0736600	0.62		sen+	Os03g0736600
Os03g0737300		-1.78	tol-	Os03g0737300
Os03g0738400	0.45		sen+	Os03g0738400
Os03g0741050	-0.72		sen-	Os03g0741050
Os03g0741100	-1.23	-0.72		Os03g0741100
Os03g0741400		0.51	tol+	Os03g0741400
Os03g0743500	-2.03	-1.12		Os03g0743500
Os03g0744700		0.46	tol+	Os03g0744700
Os03g0745550		-0.81	tol-	Os03g0745550
Os03g0747700		-0.85	tol-	Os03g0747700
Os03g0748300		-0.66	tol-	Os03g0748300
Os03g0750100	1.14	0.64		Os03g0750100
Os03g0751400		-0.76	tol-	Os03g0751400
Os03g0751600	1.62		sen+	Os03g0751600
Os03g0752300		0.5	tol+	Os03g0752300
Os03g0752400		1.37	tol+	Os03g0752400
Os03g0752500		2.61	tol+	Os03g0752500
Os03g0754300	0.59	0.68		Os03g0754300
Os03g0755000	0.49		sen+	Os03g0755000
Os03g0755100	-0.87		sen-	Os03g0755100
Os03g0755800		1.04	tol+	Os03g0755800
Os03g0756200	-0.4		sen-	Os03g0756200
Os03g0757000	-2.27		sen-	Os03g0757000
Os03g0757200	1.1	1.21		Os03g0757200
Os03g0757900	-2.21	-1.07	ΔLFC>1	Os03g0757900
Os03g0758100		0.84	tol+	Os03g0758100
Os03g0758250	1.73		sen+	Os03g0758250
Os03g0758300	0.93		sen+	Os03g0758300
Os03g0758551	-0.57		sen-	Os03g0758551
Os03g0758800	-0.42		sen-	Os03g0758800
Os03g0760300	0.68	0.64		Os03g0760300
Os03g0760500	1.54		sen+	Os03g0760500
Os03g0761000		-0.94	tol-	Os03g0761000
Os03g0762500		-1.53	tol-	Os03g0762500
Os03g0764000	0.86	1.07		Os03g0764000
Os03g0764100	-1.4	-1.26		Os03g0764100
Os03g0764600	0.81		sen+	Os03g0764600
Os03g0765400	-1.48	-2.43		Os03g0765400
Os03g0765900		-0.78	tol-	Os03g0765900
Os03g0766600		-2.15	tol-	Os03g0766600
Os03g0766800	-1.54	-1.76		Os03g0766800
Os03g0767800	0.7	0.55		Os03g0767800
Os03g0769100		-0.72	tol-	Os03g0769100
Os03g0769600		-0.66	tol-	Os03g0769600
Os03g0769800		-1.12	tol-	Os03g0769800
Os03g0772600	-0.54		sen-	Os03g0772600
Os03g0773300	-0.78		sen-	Os03g0773300
Os03g0773700	-0.93		sen-	Os03g0773700
Os03g0775000	0.79	0.58		Os03g0775000
Os03g0776100	0.8		sen+	Os03g0776100
Os03g0776150	0.71		sen+	Os03g0776150
Os03g0777000	-1.2		sen-	Os03g0777000
Os03g0778100		-0.69	tol-	Os03g0778100
Os03g0780200	1.27	0.95		Os03g0780200
Os03g0780500		-0.68	tol-	Os03g0780500
Os03g0781000		-0.65	tol-	Os03g0781000
Os03g0781300	-1.35		sen-	Os03g0781300
Os03g0781400	0.49		sen+	Os03g0781400
Os03g0781700	-1.09		sen-	Os03g0781700
Os03g0782500		-0.42	tol-	Os03g0782500
Os03g0784700		0.65	tol+	Os03g0784700
Os03g0785200		-0.45	tol-	Os03g0785200
Os03g0786400	0.55		sen+	Os03g0786400
Os03g0786500	1.02		sen+	Os03g0786500
Os03g0787000	-1.65	-1.5		Os03g0787000
Os03g0787300	0.73		sen+	Os03g0787300
Os03g0788200	1.02		sen+	Os03g0788200
Os03g0791700		1.2	tol+	Os03g0791700
Os03g0792400		-0.7	tol-	Os03g0792400
Os03g0794200		-0.76	tol-	Os03g0794200
Os03g0794300	0.86		sen+	Os03g0794300
Os03g0795800	-0.53		sen-	Os03g0795800
Os03g0796000	0.93		sen+	Os03g0796000
Os03g0796600	-0.88	-0.74		Os03g0796600
Os03g0797300		2.36	tol+	Os03g0797300
Os03g0797400	-1.26	-0.89		Os03g0797400
Os03g0797600	0.54		sen+	Os03g0797600
Os03g0799000	0.47		sen+	Os03g0799000
Os03g0799600	0.57		sen+	Os03g0799600
Os03g0800400	1.11		sen+	Os03g0800400
Os03g0800700		0.73	tol+	Os03g0800700
Os03g0801900	-1.57		sen-	Os03g0801900
Os03g0802200	0.74		sen+	Os03g0802200
Os03g0802800	0.48		sen+	Os03g0802800
Os03g0804300	-0.5		sen-	Os03g0804300
Os03g0805100	1	1.02		Os03g0805100
Os03g0805600	0.46		sen+	Os03g0805600
Os03g0806600	-2.01		sen-	Os03g0806600
Os03g0807000	-2.01	-1.43		Os03g0807000
Os03g0807900	0.58	0.82		Os03g0807900
Os03g0809100	-0.62		sen-	Os03g0809100
Os03g0810700	-1.11		sen-	Os03g0810700
Os03g0811600	0.55		sen+	Os03g0811600
Os03g0812500	-0.51		sen-	Os03g0812500
Os03g0815100		-1.11	tol-	Os03g0815100
Os03g0815200	-0.94	0.6	sen-/tol+	Os03g0815200
Os03g0815800	0.81		sen+	Os03g0815800
Os03g0816000	0.61		sen+	Os03g0816000
Os03g0816100	0.43	0.55		Os03g0816100
Os03g0816500	0.92		sen+	Os03g0816500
Os03g0816800	-1.6		sen-	Os03g0816800
Os03g0817800	2.32		sen+	Os03g0817800
Os03g0817900	0.69		sen+	Os03g0817900
Os03g0818200	1.47		sen+	Os03g0818200
Os03g0819900	-0.62		sen-	Os03g0819900
Os03g0820500	3.77	3.4		Os03g0820500
Os03g0822200	0.48	0.44		Os03g0822200
Os03g0822700	0.83		sen+	Os03g0822700
Os03g0823400		-1.91	tol-	Os03g0823400
Os03g0825600	1.59		sen+	Os03g0825600
Os03g0825800	-1.13		sen-	Os03g0825800
Os03g0826800		-1.9	tol-	Os03g0826800
Os03g0828100		-0.96	tol-	Os03g0828100
Os03g0830400	-1.09	-1.23		Os03g0830400
Os03g0832600	-0.46		sen-	Os03g0832600
Os03g0834050	-0.78	-1.13		Os03g0834050
Os03g0835100	0.56	0.61		Os03g0835100
Os03g0835150	-1.15	-0.88		Os03g0835150
Os03g0836200	-0.74	-0.43		Os03g0836200
Os03g0836300	-1.17		sen-	Os03g0836300
Os03g0837300	0.62		sen+	Os03g0837300
Os03g0837900	0.56	0.49		Os03g0837900
Os03g0838100	-0.57		sen-	Os03g0838100
Os03g0838900	0.41	0.43		Os03g0838900
Os03g0839000	-0.67		sen-	Os03g0839000
Os03g0840200	0.67		sen+	Os03g0840200
Os03g0842501		-1.7	tol-	Os03g0842501
Os03g0843400		-0.49	tol-	Os03g0843400
Os03g0844900	0.46		sen+	Os03g0844900
Os03g0845000	-1.55	-1.04		Os03g0845000
Os03g0846900		-0.94	tol-	Os03g0846900
Os03g0847900	2.55	1.19	ΔLFC<-1	Os03g0847900
Os03g0848400		-1.07	tol-	Os03g0848400
Os03g0848600	-0.53	-0.62		Os03g0848600
Os03g0848700	-1.21	-1.2		Os03g0848700
Os03g0849600	-0.57		sen-	Os03g0849600
Os03g0849800		1.07	tol+	Os03g0849800
Os03g0850200	1.08		sen+	Os03g0850200
Os03g0850400	0.72	-0.88	sen+/tol-	Os03g0850400
Os03g0850600	0.51		sen+	Os03g0850600
Os03g0850700		-0.62	tol-	Os03g0850700
Os03g0851000		-0.57	tol-	Os03g0851000
Os03g0851400		-0.8	tol-	Os03g0851400
Os03g0851700		0.52	tol+	Os03g0851700
Os03g0852000		-1.38	tol-	Os03g0852000
Os03g0854000	-0.67		sen-	Os03g0854000
Os03g0854100	-1.14		sen-	Os03g0854100
Os03g0855700	-0.71		sen-	Os03g0855700
Os03g0856100		-0.92	tol-	Os03g0856100
Os03g0856500		-1.02	tol-	Os03g0856500
Os03g0856700	-1.18		sen-	Os03g0856700
Os03g0857000		-0.67	tol-	Os03g0857000
Os03g0857500		-1.22	tol-	Os03g0857500
Os03g0857900	-1.16	-0.69		Os03g0857900
Os03g0859600	0.55		sen+	Os03g0859600
Os03g0859700	0.52	0.52		Os03g0859700
Os04g0102500	-0.55		sen-	Os04g0102500
Os04g0103100	-0.96		sen-	Os04g0103100
Os04g0103601	-1.69	-1.19		Os04g0103601
Os04g0106300		0.82	tol+	Os04g0106300
Os04g0111200	-0.8		sen-	Os04g0111200
Os04g0111350	-1.32		sen-	Os04g0111350
Os04g0116200	-1.16		sen-	Os04g0116200
Os04g0116600	-0.91	-1.64		Os04g0116600
Os04g0118700	0.68		sen+	Os04g0118700
Os04g0119500	0.45		sen+	Os04g0119500
Os04g0122000	-0.91		sen-	Os04g0122000
Os04g0127500	-1.38		sen-	Os04g0127500
Os04g0136700	1.66	1.23		Os04g0136700
Os04g0150300	1.27		sen+	Os04g0150300
Os04g0151800	-0.43		sen-	Os04g0151800
Os04g0154800	-2.37		sen-	Os04g0154800
Os04g0164900	1.14	1.83		Os04g0164900
Os04g0169100	-0.61		sen-	Os04g0169100
Os04g0171600	-2.24		sen-	Os04g0171600
Os04g0171800	-0.74		sen-	Os04g0171800
Os04g0175600	-0.59	-0.84		Os04g0175600
Os04g0178300	-2.8		sen-	Os04g0178300
Os04g0178400		-0.81	tol-	Os04g0178400
Os04g0180900		-1.06	tol-	Os04g0180900
Os04g0185600		0.78	tol+	Os04g0185600
Os04g0186400		1.16	tol+	Os04g0186400
Os04g0194500	-0.8		sen-	Os04g0194500
Os04g0197200	-0.84		sen-	Os04g0197200
Os04g0201500	1.88	1.43		Os04g0201500
Os04g0201800	1.48	1.3		Os04g0201800
Os04g0201900	1.07	0.64		Os04g0201900
Os04g0202500		-0.9	tol-	Os04g0202500
Os04g0209200	0.9	1.62		Os04g0209200
Os04g0209300		0.54	tol+	Os04g0209300
Os04g0219550	-1.43		sen-	Os04g0219550
Os04g0223500	-1.24	-1.22		Os04g0223500
Os04g0224000		-0.72	tol-	Os04g0224000
Os04g0226340	-1.37		sen-	Os04g0226340
Os04g0226400	-0.55		sen-	Os04g0226400
Os04g0227500	-1.68		sen-	Os04g0227500
Os04g0233400	1.56		sen+	Os04g0233400
Os04g0234600	0.44		sen+	Os04g0234600
Os04g0244800	0.74	0.78		Os04g0244800
Os04g0253000	0.44	0.51		Os04g0253000
Os04g0266900	1.53	0.69		Os04g0266900
Os04g0280500	0.54	-1.14	sen+/tol-	Os04g0280500
Os04g0286300	-0.67		sen-	Os04g0286300
Os04g0286366		-1.48	tol-	Os04g0286366
Os04g0295000		-0.71	tol-	Os04g0295000
Os04g0300600	0.93	0.83		Os04g0300600
Os04g0302300	-1.59		sen-	Os04g0302300
Os04g0306400		-0.87	tol-	Os04g0306400
Os04g0306750	0.74		sen+	Os04g0306750
Os04g0307500	-1.91		sen-	Os04g0307500
Os04g0308000	-0.65		sen-	Os04g0308000
Os04g0308100	-0.65		sen-	Os04g0308100
Os04g0310400	-1.51		sen-	Os04g0310400
Os04g0320700	1.9	1.14		Os04g0320700
Os04g0321700	0.49		sen+	Os04g0321700
Os04g0323800		0.84	tol+	Os04g0323800
Os04g0330301	3.04		sen+	Os04g0330301
Os04g0338000	0.58	0.87		Os04g0338000
Os04g0338100	-0.96		sen-	Os04g0338100
Os04g0338950	-2.68		sen-	Os04g0338950
Os04g0345400	-0.96		sen-	Os04g0345400
Os04g0346100		-0.6	tol-	Os04g0346100
Os04g0347700	1.21		sen+	Os04g0347700
Os04g0347800	1.09		sen+	Os04g0347800
Os04g0349700		0.61	tol+	Os04g0349700
Os04g0352400	3.57	2.12	ΔLFC<-1	Os04g0352400
Os04g0355401	-0.52		sen-	Os04g0355401
Os04g0363700	-1.26	-0.93		Os04g0363700
Os04g0364800	-1.99	-1.75		Os04g0364800
Os04g0366000		-1.02	tol-	Os04g0366000
Os04g0368000	-1.42	-1.03		Os04g0368000
Os04g0368800	-1.49		sen-	Os04g0368800
Os04g0369100	-2.03		sen-	Os04g0369100
Os04g0370900	-2.02		sen-	Os04g0370900
Os04g0371000	-1.74		sen-	Os04g0371000
Os04g0373400	-0.74		sen-	Os04g0373400
Os04g0378575	-1.52	-0.76		Os04g0378575
Os04g0379600	-1.67	-0.91		Os04g0379600
Os04g0379700	0.48		sen+	Os04g0379700
Os04g0380300	-0.84		sen-	Os04g0380300
Os04g0382300	-0.68	-0.74		Os04g0382300
Os04g0385900	-0.6	-0.8		Os04g0385900
Os04g0387000	-1.41	-1.5		Os04g0387000
Os04g0388700	-0.64	-0.57		Os04g0388700
Os04g0390100	1.38		sen+	Os04g0390100
Os04g0391500	0.7	-0.96	sen+/tol-	Os04g0391500
Os04g0394700	-1.26		sen-	Os04g0394700
Os04g0397700	0.63		sen+	Os04g0397700
Os04g0399000		-0.62	tol-	Os04g0399000
Os04g0399300		0.91	tol+	Os04g0399300
Os04g0399600	-0.83		sen-	Os04g0399600
Os04g0400000		-1.15	tol-	Os04g0400000
Os04g0401700	-1.95		sen-	Os04g0401700
Os04g0402100	-0.53	-0.56		Os04g0402100
Os04g0402500	1.04	0.79		Os04g0402500
Os04g0403200	0.81		sen+	Os04g0403200
Os04g0403500	0.79	0.84		Os04g0403500
Os04g0404900		-1.56	tol-	Os04g0404900
Os04g0408700	-0.88		sen-	Os04g0408700
Os04g0409200		0.63	tol+	Os04g0409200
Os04g0409900		1.13	tol+	Os04g0409900
Os04g0410200	-0.76		sen-	Os04g0410200
Os04g0411800		0.66	tol+	Os04g0411800
Os04g0412000	-1.2	-1.42		Os04g0412000
Os04g0413900	1.44		sen+	Os04g0413900
Os04g0414700		-1	tol-	Os04g0414700
Os04g0416700	-1.64	-1.38		Os04g0416700
Os04g0419550		-0.89	tol-	Os04g0419550
Os04g0419900	-1.55	-1.57		Os04g0419900
Os04g0420801		0.91	tol+	Os04g0420801
Os04g0423400	1.47	0.61		Os04g0423400
Os04g0423600	1	0.78		Os04g0423600
Os04g0425100	1.07	0.82		Os04g0425100
Os04g0429900	0.68		sen+	Os04g0429900
Os04g0430200	2.35	1.43		Os04g0430200
Os04g0430600	-1.09		sen-	Os04g0430600
Os04g0430950	-0.64		sen-	Os04g0430950
Os04g0432000		-0.86	tol-	Os04g0432000
Os04g0432400	0.63		sen+	Os04g0432400
Os04g0432500	-0.59		sen-	Os04g0432500
Os04g0433200		0.46	tol+	Os04g0433200
Os04g0433800		-0.95	tol-	Os04g0433800
Os04g0434600	0.82	1.1		Os04g0434600
Os04g0434800	0.82	1.59		Os04g0434800
Os04g0435100	-1.38		sen-	Os04g0435100
Os04g0438600		-0.91	tol-	Os04g0438600
Os04g0439100		0.6	tol+	Os04g0439100
Os04g0439400	0.51	0.63		Os04g0439400
Os04g0441800	-1.1		sen-	Os04g0441800
Os04g0441900	-0.58		sen-	Os04g0441900
Os04g0442200		0.81	tol+	Os04g0442200
Os04g0442800	-0.79	-0.71		Os04g0442800
Os04g0443500	0.54		sen+	Os04g0443500
Os04g0443700		0.85	tol+	Os04g0443700
Os04g0443900	-0.66	-0.96		Os04g0443900
Os04g0444800	1.12	1.2		Os04g0444800
Os04g0444900	0.82		sen+	Os04g0444900
Os04g0445200	0.79		sen+	Os04g0445200
Os04g0445700		-1.16	tol-	Os04g0445700
Os04g0447100		-1	tol-	Os04g0447100
Os04g0448300	-1.45		sen-	Os04g0448300
Os04g0448600	0.4	0.42		Os04g0448600
Os04g0448950	0.82		sen+	Os04g0448950
Os04g0450100	0.54	0.77		Os04g0450100
Os04g0452000	-0.77		sen-	Os04g0452000
Os04g0453200	-1.44	-1.53		Os04g0453200
Os04g0453400	-1.2	-1.08		Os04g0453400
Os04g0454600	-0.87	-0.93		Os04g0454600
Os04g0455700		-0.93	tol-	Os04g0455700
Os04g0456700	0.56		sen+	Os04g0456700
Os04g0457000		-1.11	tol-	Os04g0457000
Os04g0457800	-1.61	-0.68		Os04g0457800
Os04g0459500	0.49		sen+	Os04g0459500
Os04g0460600	1.62		sen+	Os04g0460600
Os04g0460900		-0.52	tol-	Os04g0460900
Os04g0461100		-0.63	tol-	Os04g0461100
Os04g0462500	-1.41		sen-	Os04g0462500
Os04g0462900		-0.55	tol-	Os04g0462900
Os04g0463200	-0.87	-0.95		Os04g0463200
Os04g0463500	-1.02	-0.83		Os04g0463500
Os04g0464200	0.53		sen+	Os04g0464200
Os04g0466100	0.56		sen+	Os04g0466100
Os04g0466600	0.45	0.53		Os04g0466600
Os04g0468600	-2.91	1.33	sen-/tol+	Os04g0468600
Os04g0469000	-2.76	-1.65	ΔLFC>1	Os04g0469000
Os04g0470150	0.72	0.79		Os04g0470150
Os04g0470700		0.86	tol+	Os04g0470700
Os04g0473400		-0.48	tol-	Os04g0473400
Os04g0474800	-2.07	-0.92	ΔLFC>1	Os04g0474800
Os04g0474900	1.19		sen+	Os04g0474900
Os04g0475200	0.75	1.1		Os04g0475200
Os04g0476100	-1.35	-1.27		Os04g0476100
Os04g0478000	0.4		sen+	Os04g0478000
Os04g0478600		0.99	tol+	Os04g0478600
Os04g0480200	-1.11	0.97	sen-/tol+	Os04g0480200
Os04g0480500	-0.9		sen-	Os04g0480500
Os04g0481100	-1.2	-1.17		Os04g0481100
Os04g0482300		-1.18	tol-	Os04g0482300
Os04g0482900	0.52		sen+	Os04g0482900
Os04g0485300	-0.43		sen-	Os04g0485300
Os04g0487000	-0.55		sen-	Os04g0487000
Os04g0487200	-1.36	-0.62		Os04g0487200
Os04g0488100		1.08	tol+	Os04g0488100
Os04g0490000		-1.14	tol-	Os04g0490000
Os04g0490500	-0.73	-0.46		Os04g0490500
Os04g0490800	0.47		sen+	Os04g0490800
Os04g0491700	0.68	0.59		Os04g0491700
Os04g0492100		0.45	tol+	Os04g0492100
Os04g0492400	-0.49		sen-	Os04g0492400
Os04g0492500	-0.54	-0.61		Os04g0492500
Os04g0492600	-0.63	-0.53		Os04g0492600
Os04g0496000	-1		sen-	Os04g0496000
Os04g0496150		-1.29	tol-	Os04g0496150
Os04g0496400	0.48	0.57		Os04g0496400
Os04g0497000	-1		sen-	Os04g0497000
Os04g0497700	0.57		sen+	Os04g0497700
Os04g0500200	1		sen+	Os04g0500200
Os04g0500700	-0.65		sen-	Os04g0500700
Os04g0501200		-0.64	tol-	Os04g0501200
Os04g0503600	-1.08		sen-	Os04g0503600
Os04g0504000	-0.6		sen-	Os04g0504000
Os04g0504700	0.79		sen+	Os04g0504700
Os04g0508800	-0.98		sen-	Os04g0508800
Os04g0509600	0.72	1.33		Os04g0509600
Os04g0513400	1.17	1.33		Os04g0513400
Os04g0514600	-3.21	-1.93	ΔLFC>1	Os04g0514600
Os04g0515400	-1.6	-0.98		Os04g0515400
Os04g0517350	-1.01		sen-	Os04g0517350
Os04g0518400	0.74	0.96		Os04g0518400
Os04g0521700	1.26		sen+	Os04g0521700
Os04g0524500	-1.86	-0.44	ΔLFC>1	Os04g0524500
Os04g0524600	-1.8		sen-	Os04g0524600
Os04g0527400	0.43	0.62		Os04g0527400
Os04g0527800	0.65		sen+	Os04g0527800
Os04g0528300		-0.59	tol-	Os04g0528300
Os04g0529400	0.53	0.72		Os04g0529400
Os04g0529800	-1.37	-0.84		Os04g0529800
Os04g0530200	-0.66	-0.86		Os04g0530200
Os04g0530600	1.8	1.49		Os04g0530600
Os04g0531400	-0.85	-0.88		Os04g0531400
Os04g0531750	-0.49	-0.45		Os04g0531750
Os04g0531900	-0.78	-0.99		Os04g0531900
Os04g0532400		0.52	tol+	Os04g0532400
Os04g0534600	0.74		sen+	Os04g0534600
Os04g0535600	0.88		sen+	Os04g0535600
Os04g0537800	0.9		sen+	Os04g0537800
Os04g0537900	0.43	0.53		Os04g0537900
Os04g0538000	1.6	0.57	ΔLFC<-1	Os04g0538000
Os04g0538100	0.53	0.69		Os04g0538100
Os04g0538166	0.55	0.48		Os04g0538166
Os04g0539000	0.41		sen+	Os04g0539000
Os04g0540200	-1.57	-2.17		Os04g0540200
Os04g0541700	2.18	1.8		Os04g0541700
Os04g0542000	0.96	0.71		Os04g0542000
Os04g0542200		-0.66	tol-	Os04g0542200
Os04g0542800	-0.62	-0.58		Os04g0542800
Os04g0543900	-0.62		sen-	Os04g0543900
Os04g0544400		-0.57	tol-	Os04g0544400
Os04g0546800	-0.97	-2.2	ΔLFC<-1	Os04g0546800
Os04g0548700	0.86		sen+	Os04g0548700
Os04g0553800	-0.87		sen-	Os04g0553800
Os04g0555300	0.5	0.57		Os04g0555300
Os04g0555600	-0.66		sen-	Os04g0555600
Os04g0558500	-1.19		sen-	Os04g0558500
Os04g0559700	1.43	0.94		Os04g0559700
Os04g0561500	0.51		sen+	Os04g0561500
Os04g0564700	-0.61		sen-	Os04g0564700
Os04g0569100		1.09	tol+	Os04g0569100
Os04g0569900		0.53	tol+	Os04g0569900
Os04g0571200		1.7	tol+	Os04g0571200
Os04g0573200	0.49		sen+	Os04g0573200
Os04g0573900	-1.24		sen-	Os04g0573900
Os04g0576800	0.8	0.64		Os04g0576800
Os04g0577200		0.73	tol+	Os04g0577200
Os04g0577800	1.37		sen+	Os04g0577800
Os04g0578200	0.92	1.11		Os04g0578200
Os04g0578400	1	0.68		Os04g0578400
Os04g0578550	2.18	1.4		Os04g0578550
Os04g0578600	0.86	2.69	ΔLFC>1	Os04g0578600
Os04g0581100		2.31	tol+	Os04g0581100
Os04g0583700	0.76	0.72		Os04g0583700
Os04g0584600	-1.3	-0.93		Os04g0584600
Os04g0585600		0.59	tol+	Os04g0585600
Os04g0586000		0.9	tol+	Os04g0586000
Os04g0586100	0.67	0.93		Os04g0586100
Os04g0586200	1.45	2.02		Os04g0586200
Os04g0587400	-0.89		sen-	Os04g0587400
Os04g0588500		0.52	tol+	Os04g0588500
Os04g0589400	-2.32	-1.48		Os04g0589400
Os04g0591000		-0.52	tol-	Os04g0591000
Os04g0592400		0.98	tol+	Os04g0592400
Os04g0592600		0.58	tol+	Os04g0592600
Os04g0594400	-1.42		sen-	Os04g0594400
Os04g0596300	-0.63		sen-	Os04g0596300
Os04g0597400	-1.21		sen-	Os04g0597400
Os04g0598000	-0.82	-0.83		Os04g0598000
Os04g0598200		-0.55	tol-	Os04g0598200
Os04g0598800	-1.2		sen-	Os04g0598800
Os04g0598900	-0.63		sen-	Os04g0598900
Os04g0599000	-0.82		sen-	Os04g0599000
Os04g0600200		-0.53	tol-	Os04g0600200
Os04g0600300	-1.17	-1.74		Os04g0600300
Os04g0601400		-0.51	tol-	Os04g0601400
Os04g0602100	0.47	-0.53	sen+/tol-	Os04g0602100
Os04g0603400	0.67		sen+	Os04g0603400
Os04g0603601		1.06	tol+	Os04g0603601
[truncated: 2,338 more rows]

## Sheet: Z. mays
gene ID	logFC.sen	logFC.tol	Class	Rice ortholog
ENSRNA049469775	-4.39		sen-
ZeamMp136	-2.59		sen-
ZemaCp003	-2.49		sen-	Os11g0517350
Zm00001d000508		-1.86	tol-
Zm00001d000551	1.32		sen+
Zm00001d000681	-2.96		sen-
Zm00001d000709	-1.82		sen-
Zm00001d000719		1.64	tol+
Zm00001d000824	0.97	-1.83	sen+/tol-
Zm00001d000834	-2.76		sen-
Zm00001d000909	2.78		sen+
Zm00001d000977	-2.65	1.66	sen-/tol+
Zm00001d001087	-2.14		sen-
Zm00001d001276	1.72		sen+
Zm00001d001303	1.68		sen+
Zm00001d001349		0.9	tol+
Zm00001d001373	1.39		sen+
Zm00001d001472	-1.76		sen-
Zm00001d001609	-1.88		sen-
Zm00001d001628	-2.34		sen-
Zm00001d001688	-2.04		sen-
Zm00001d001756	1.72		sen+
Zm00001d001788	-0.84		sen-	Os04g0682800
Zm00001d001799	-1.77		sen-	Os05g0453900
Zm00001d001803	-1.93		sen-	Os04g0681600
Zm00001d001806	-1.41		sen-	Os04g0680700
Zm00001d001812	-1.3		sen-	Os10g0445600
Zm00001d001814	0.65		sen+	Os04g0679100
Zm00001d001820	-2.96		sen-	Os04g0678700
Zm00001d001831	0.95		sen+	Os04g0677500
Zm00001d001843	-1.19		sen-	Os04g0676100
Zm00001d001847	-0.98		sen-	Os10g0198600
Zm00001d001857	-2.3		sen-	Os04g0457000
Zm00001d001858	2		sen+	Os04g0674300
Zm00001d001860	-1.51		sen-	Os08g0485900
Zm00001d001879	-1.59		sen-	Os04g0671900
Zm00001d001880	-1.28		sen-	Os01g0551400
Zm00001d001899	-1.45		sen-	Os01g0191100
Zm00001d001908	-0.9		sen-	Os04g0668900
Zm00001d001914	-0.75		sen-	Os04g0667700
Zm00001d001935	-0.95		sen-	Os09g0378300
Zm00001d001947	0.98	-0.78	sen+/tol-	Os04g0663700
Zm00001d001953	1.23		sen+	Os04g0663100
Zm00001d001982	0.99		sen+	Os04g0660100
Zm00001d001984	2.04		sen+	Os04g0659800
Zm00001d001993	3.49	-1.78	sen+/tol-
Zm00001d001995	-0.86		sen-	Os04g0658300
Zm00001d002000	-2.21		sen-
Zm00001d002001	-1.21		sen-	Os04g0657900
Zm00001d002021	1.55		sen+
Zm00001d002035	2.79		sen+	Os04g0652700
Zm00001d002038		0.73	tol+	Os04g0652400
Zm00001d002039	1.3		sen+
Zm00001d002052	4.18		sen+	Os04g0650700
Zm00001d002054	-1.99		sen-	Os04g0650500
Zm00001d002063	-1.32		sen-
Zm00001d002064	1.82		sen+	Os04g0650366
Zm00001d002066	1		sen+	Os04g0649900
Zm00001d002069		-1.26	tol-	Os04g0649600
Zm00001d002072	1.81		sen+	Os04g0649500
Zm00001d002087	1.05		sen+	Os04g0645600
Zm00001d002089	-1.29		sen-	Os04g0645100
Zm00001d002091	-1.45		sen-	Os04g0644800
Zm00001d002098	-2.42		sen-	Os04g0643700
Zm00001d002104	-1.41		sen-	Os04g0643200
Zm00001d002126		-1.46	tol-	Os04g0640900
Zm00001d002129		0.59	tol+	Os04g0640500
Zm00001d002137	-1.59		sen-
Zm00001d002146	-1.65	0.98	sen-/tol+	Os04g0636500
Zm00001d002147	-2.27		sen-	Os04g0636300
Zm00001d002154	-1.12		sen-	Os04g0635900
Zm00001d002174		1.24	tol+
Zm00001d002186		-2.5	tol-	Os04g0629700
Zm00001d002187	-0.89		sen-	Os02g0120000
Zm00001d002198		0.71	tol+	Os07g0302100
Zm00001d002216	-1.76		sen-	Os04g0627200
Zm00001d002240	-1.45		sen-	Os04g0626400
Zm00001d002256	-3.2		sen-	Os04g0624600
Zm00001d002258	-1.18		sen-	Os04g0623800
Zm00001d002260		-1.72	tol-
Zm00001d002261	1.39		sen+	Os04g0623500
Zm00001d002283	0.92		sen+	Os04g0619400
Zm00001d002285	3.51		sen+
Zm00001d002287		-3.39	tol-	Os04g0618700
Zm00001d002313	-1.83		sen-	Os04g0616200
Zm00001d002323	1.07		sen+	Os04g0615000
Zm00001d002325	-0.92		sen-	Os04g0614650
Zm00001d002326	1.08		sen+	Os04g0614600
Zm00001d002339	-0.79		sen-	Os07g0565100
Zm00001d002341	-0.85		sen-	Os04g0613300
Zm00001d002346		-1.9	tol-	Os04g0612700
Zm00001d002347	-4.2	-2.72	ΔLFC>1	Os04g0612500
Zm00001d002350		-1.22	tol-	Os04g0612000
Zm00001d002353	-1.64		sen-	Os04g0611200
Zm00001d002358	-1.71		sen-	Os04g0610800
Zm00001d002360	7.72		sen+	Os04g0610600
Zm00001d002364	1.88		sen+	Os04g0610400
Zm00001d002384	-1.72		sen-	Os04g0607000
Zm00001d002393	1.56		sen+	Os04g0606200
Zm00001d002395	-1.3		sen-	Os04g0605900
Zm00001d002396	-2.77	-1.65	ΔLFC>1	Os04g0605500
Zm00001d002405	1.32		sen+	Os04g0605100
Zm00001d002410	-2.89		sen-	Os04g0604300
Zm00001d002423	-3		sen-	Os04g0602400
Zm00001d002426	-2.58		sen-	Os04g0602100
Zm00001d002434	3.73		sen+	Os04g0600300
Zm00001d002451		-0.65	tol-	Os04g0598000
Zm00001d002476	2.9		sen+	Os04g0594100
Zm00001d002490	-1.65		sen-
Zm00001d002491	-2.23		sen-	Os04g0590900
Zm00001d002500	1.02		sen+	Os04g0589500
Zm00001d002501	-1.32		sen-	Os04g0589200
Zm00001d002532		0.86	tol+	Os04g0585200
Zm00001d002534	1.65		sen+	Os04g0585100
Zm00001d002535	1.51		sen+	Os04g0585000
Zm00001d002536	2.98		sen+	Os04g0584100
Zm00001d002541	2.32		sen+
Zm00001d002542	0.75		sen+	Os04g0584300
Zm00001d002565		-1.73	tol-	Os04g0580866
Zm00001d002572	-1.27		sen-	Os04g0580400
Zm00001d002585	-0.71		sen-	Os12g0443700
Zm00001d002589	-2.82	-1.15	ΔLFC>1	Os04g0578400
Zm00001d002592	2.64		sen+	Os04g0578000
Zm00001d002594	1.43		sen+	Os04g0577700
Zm00001d002596	-1.21		sen-	Os04g0577375
Zm00001d002597	-1.12		sen-	Os04g0577200
Zm00001d002600	-0.79		sen-	Os07g0493400
Zm00001d002614	2.98		sen+	Os04g0573000
Zm00001d002624	-2.47		sen-	Os04g0571200
Zm00001d002642	-2.14		sen-	Os02g0673700
Zm00001d002649	-2.29		sen-	Os04g0566600
Zm00001d002673		-0.62	tol-	Os04g0562100
Zm00001d002704	1.12		sen+	Os04g0556300
Zm00001d002736		1.86	tol+	Os04g0550600
Zm00001d002739		-1.49	tol-	Os07g0185200
Zm00001d002756		0.59	tol+
Zm00001d002762	0.82		sen+	Os04g0546800
Zm00001d002776	1.75		sen+	Os04g0543000
Zm00001d002778	0.68		sen+
Zm00001d002788	-1.26		sen-	Os04g0544200
Zm00001d002789	-3.75		sen-	Os04g0544400
Zm00001d002797	1.32		sen+	Os04g0542200
Zm00001d002799	4.8		sen+	Os04g0541700
Zm00001d002815	-1.78		sen-	Os04g0539000
Zm00001d002816	2.55		sen+	Os04g0538900
Zm00001d002822	-2.29		sen-	Os04g0538166
Zm00001d002823	0.91		sen+	Os04g0538000
Zm00001d002825	-1.48		sen-	Os04g0537800
Zm00001d002830	2.58		sen+	Os04g0535600
Zm00001d002833	-2.28		sen-	Os04g0535200
Zm00001d002834	-1.56		sen-	Os04g0534600
Zm00001d002836	0.81		sen+	Os04g0534100
Zm00001d002837	-1.98		sen-	Os04g0533500
Zm00001d002847	2.73	-1.04	sen+/tol-	Os04g0532100
Zm00001d002853	1.07		sen+	Os04g0530700
Zm00001d002859	-0.93		sen-	Os02g0639600
Zm00001d002864	0.82		sen+	Os04g0529800
Zm00001d002871	-1.42		sen-	Os04g0528300
Zm00001d002873	-1.34		sen-	Os04g0528100
Zm00001d002876	1.09		sen+	Os04g0686200
Zm00001d002905	-3.28		sen-	Os04g0689400
Zm00001d002934	-1.52		sen-	Os04g0691300
Zm00001d002937	-1.7		sen-	Os01g0602400
Zm00001d002940	2.43		sen+	Os04g0691900
Zm00001d002943	-0.86		sen-	Os04g0692400
Zm00001d002951	-2.22		sen-	Os04g0692600
Zm00001d002956	-0.69		sen-	Os04g0527400
Zm00001d002960	1.96		sen+	Os04g0526600
Zm00001d002967	0.89		sen+
Zm00001d002971	-1.65		sen-	Os04g0525000
Zm00001d002979	1.85		sen+
Zm00001d002980	1.39		sen+	Os04g0524400
Zm00001d002989	4.85		sen+	Os04g0523500
Zm00001d002993	-3.16		sen-	Os04g0523000
Zm00001d002999	2.65	-2.21	sen+/tol-	Os04g0522500
Zm00001d003015		-1.8	tol-	Os04g0518400
Zm00001d003021		0.61	tol+
Zm00001d003023		0.76	tol+
Zm00001d003024	-1.24		sen-	Os04g0509400
Zm00001d003044	-2.06		sen-
Zm00001d003045	-1.77		sen-
Zm00001d003060	3.7		sen+	Os04g0516900
Zm00001d003061	2.5		sen+
Zm00001d003064	1.84		sen+	Os04g0517100
Zm00001d003083	-0.86		sen-	Os04g0508200
Zm00001d003086	-1.89		sen-	Os07g0142900
Zm00001d003088	-2.48		sen-	Os04g0507100
Zm00001d003101	0.72		sen+	Os04g0506100
Zm00001d003102	-1.2		sen-	Os04g0506000
Zm00001d003112		0.67	tol+	Os04g0503500
Zm00001d003116		-1.23	tol-	Os04g0502800
Zm00001d003129	1.17		sen+
Zm00001d003148	1.17		sen+	Os04g0499200
Zm00001d003162	-0.82	0.98	sen-/tol+	Os04g0497700
Zm00001d003180	1.47		sen+
Zm00001d003181	-1.55		sen-	Os04g0495400
Zm00001d003188	4.31		sen+	Os04g0493400
Zm00001d003190	5.53		sen+	Os04g0493400
Zm00001d003191	3.96		sen+	Os04g0493400
Zm00001d003195		0.7	tol+	Os04g0493000
Zm00001d003196	-1.29		sen-	Os04g0492900
Zm00001d003213	-1.94		sen-
Zm00001d003220	0.87		sen+	Os04g0661300
Zm00001d003247	2.01		sen+	Os04g0486950
Zm00001d003251	-1.49		sen-	Os08g0236700
Zm00001d003276	-0.98		sen-	Os04g0481300
Zm00001d003283	3.13		sen+	Os04g0480600
Zm00001d003291	-1.15		sen-	Os04g0479100
Zm00001d003292	-1.11		sen-	Os04g0477500
Zm00001d003301	2.32		sen+
Zm00001d003304	2.88		sen+	Os01g0124000
Zm00001d003334	1.4		sen+	Os04g0471300
Zm00001d003354	1.79		sen+	Os10g0205500
Zm00001d003373	-1.17		sen-	Os04g0466100
Zm00001d003381	-2.47		sen-	Os04g0465100
Zm00001d003395	1.37		sen+	Os04g0463500
Zm00001d003404	-1.74		sen-	Os04g0462300
Zm00001d003411	-2.86		sen-	Os04g0461100
Zm00001d003422	-1.57		sen-
Zm00001d003426	-0.93		sen-	Os04g0459900
Zm00001d003429	-1.88		sen-	Os04g0459500
Zm00001d003430	-0.91		sen-	Os01g0500900
Zm00001d003432	1.53		sen+	Os04g0458600
Zm00001d003446	1.41		sen+	Os04g0457500
Zm00001d003457		-1.41	tol-	Os04g0456700
Zm00001d003459	-1.83		sen-	Os03g0244000
Zm00001d003463	2.2		sen+	Os04g0455700
Zm00001d003471	1.54	-1.96	sen+/tol-	Os04g0452700
Zm00001d003495	2.06		sen+	Os04g0450500
Zm00001d003504		-1.09	tol-	Os04g0450100
Zm00001d003508	0.87		sen+	Os04g0449500
Zm00001d003512	-0.96		sen-	Os04g0448950
Zm00001d003524	1.73		sen+	Os04g0447700
Zm00001d003533	2.83	-0.93	sen+/tol-	Os04g0447100
Zm00001d003534	-2.25		sen-
Zm00001d003552	-0.76		sen-	Os04g0445200
Zm00001d003553	-2.08		sen-
Zm00001d003559	-2.83	0.84	sen-/tol+	Os04g0444800
Zm00001d003567	3.32		sen+	Os04g0444600
Zm00001d003589	-0.93		sen-
Zm00001d003593	1.16		sen+	Os04g0443200
Zm00001d003601	-2.13		sen-	Os04g0442000
Zm00001d003616	-0.98		sen-	Os04g0438700
Zm00001d003624	2.87		sen+	Os04g0437300
Zm00001d003626	1.29		sen+	Os04g0437000
Zm00001d003630	1.23		sen+	Os04g0436100
Zm00001d003632	-1.89		sen-	Os04g0435700
Zm00001d003659	1.57		sen+	Os04g0432000
Zm00001d003663	-0.66		sen-	Os04g0431100
Zm00001d003670	-1.88		sen-	Os04g0430400
Zm00001d003671	-1.27		sen-	Os04g0430200
Zm00001d003676	-4.46		sen-
Zm00001d003680	-0.85		sen-	Os12g0167900
Zm00001d003683	-0.93		sen-	Os12g0167900
Zm00001d003684	0.72		sen+	Os04g0428950
Zm00001d003712	1.81		sen+	Os04g0423400
Zm00001d003715	-2.82		sen-	Os04g0422000
Zm00001d003719	-1.75		sen-	Os04g0423200
Zm00001d003750	-1.08		sen-
Zm00001d003756	-0.93		sen-	Os04g0416000
Zm00001d003767	-2.45		sen-	Os04g0414700
Zm00001d003781	-2.8		sen-	Os04g0412500
Zm00001d003830	1.89		sen+	Os04g0406600
Zm00001d003841	-2.2		sen-	Os04g0405300
Zm00001d003846	-1.4		sen-	Os04g0405100
Zm00001d003848		-1.45	tol-	Os04g0404900
Zm00001d003850	-0.81	1.02	sen-/tol+
Zm00001d003867	-1.54		sen-
Zm00001d003895	-1.49		sen-	Os04g0396800
Zm00001d003913	-1.41		sen-	Os06g0102600
Zm00001d003924		-2.35	tol-	Os04g0394100
Zm00001d003931	-1.31		sen-	Os04g0391500
Zm00001d003935	-0.86		sen-
Zm00001d003937	-2.09		sen-	Os04g0391000
Zm00001d003945		0.82	tol+	Os04g0390100
Zm00001d003954		-1.86	tol-
Zm00001d003962	-2.23		sen-	Os04g0387600
Zm00001d003966	-3.72		sen-	Os04g0387000
Zm00001d003974	-0.99		sen-	Os04g0386600
Zm00001d003975	-0.69		sen-	Os04g0386500
Zm00001d003981		1.58	tol+	Os04g0385900
Zm00001d003994	4.35		sen+
Zm00001d004009	-1.37		sen-	Os01g0679700
Zm00001d004013	-1.75		sen-	Os04g0565200
Zm00001d004021	-1.23		sen-
Zm00001d004022	0.84		sen+	Os04g0379600
Zm00001d004052	-1.21		sen-	Os02g0503400
Zm00001d004075		-0.93	tol-	Os09g0506000
Zm00001d004102	-2.99		sen-	Os04g0348800
Zm00001d004125	-0.93		sen-	Os05g0295300
Zm00001d004143	-2.13		sen-	Os04g0250700
Zm00001d004193	-0.71		sen-	Os04g0276600
Zm00001d004196	-1.69		sen-	Os04g0278900
Zm00001d004200	-1.22		sen-
Zm00001d004248	1.12	-0.86	sen+/tol-	Os08g0404000
Zm00001d004279		1.48	tol+
Zm00001d004292	1.09		sen+
Zm00001d004342	-2.2		sen-
Zm00001d004344	-1.31		sen-
Zm00001d004346	-1.48		sen-
Zm00001d004348	-2.1		sen-
Zm00001d004358	-1.35		sen-
Zm00001d004361	0.84		sen+	Os04g0209200
Zm00001d004366	3.17		sen+	Os04g0203600
Zm00001d004375	1.76		sen+	Os05g0406550
Zm00001d004392	-1.34		sen-	Os07g0534000
Zm00001d004400	-1.25		sen-	Os11g0544500
Zm00001d004401	3.37		sen+	Os08g0189300
Zm00001d004437	-2.54		sen-	Os04g0165000
Zm00001d004439	-3.63		sen-	Os04g0162500
Zm00001d004452		-1.6	tol-	Os04g0136700
Zm00001d004460	-1.19		sen-	Os04g0132300
Zm00001d004473	-1.51		sen-	Os04g0119400
Zm00001d004478	-1.07		sen-
Zm00001d004480	-1.24		sen-	Os05g0147300
Zm00001d004482	0.92		sen+	Os05g0188300
Zm00001d004513		-1.2	tol-	Os04g0111200
Zm00001d004523	-1.87		sen-	Os04g0110200
Zm00001d004524	3.89		sen+	Os04g0110100
Zm00001d004525	1.79		sen+
Zm00001d004586	-0.92		sen-	Os10g0555900
Zm00001d004644	-1.31		sen-	Os06g0470800
Zm00001d004655	1.52		sen+	Os11g0473000
Zm00001d004664		-1.41	tol-	Os11g0483000
Zm00001d004698	1.16		sen+	Os11g0222000
Zm00001d004700	-6.16		sen-	Os05g0160300
Zm00001d004706	0.89		sen+	Os11g0195500
Zm00001d004716		0.71	tol+	Os11g0191400
Zm00001d004723	-1.56		sen-	Os12g0541500
Zm00001d004737	-1.38		sen-
Zm00001d004753	-2.84		sen-	Os11g0180000
Zm00001d004762	1.36		sen+	Os11g0177400
Zm00001d004768	1.22		sen+	Os11g0704600
Zm00001d004831	1.83		sen+	Os04g0614600
Zm00001d004841	-1.03		sen-	Os12g0167900
Zm00001d004843	-1.18		sen-
Zm00001d004847		1.08	tol+	Os11g0164200
Zm00001d004894	-2.22		sen-	Os12g0291200
Zm00001d004908	1.14		sen+	Os11g0153300
Zm00001d004910		-2.75	tol-	Os11g0153000
Zm00001d004916	-2		sen-	Os12g0149900
Zm00001d004917	-1.87	1.15	sen-/tol+	Os11g0150450
Zm00001d004921	2.79	-1.42	sen+/tol-
Zm00001d004924	-1.15		sen-	Os11g0149100
Zm00001d004957	-1.23		sen-	Os12g0139300
Zm00001d004977	-1.44		sen-	Os12g0137300
Zm00001d004978	-1.29		sen-	Os12g0137200
Zm00001d004998	-1.22		sen-	Os11g0136600
Zm00001d005019	1.24		sen+	Os05g0317200
Zm00001d005026	1.64		sen+	Os05g0305200
Zm00001d005047	-2.05		sen-	Os11g0118600
Zm00001d005051		0.98	tol+	Os12g0117400
Zm00001d005072		-1.59	tol-	Os12g0108500
Zm00001d005080	-1.79		sen-	Os12g0106600
Zm00001d005094	-0.99		sen-	Os12g0175500
Zm00001d005099	-1.4		sen-	Os11g0103700
Zm00001d005118		-1.06	tol-	Os09g0258000
Zm00001d005144	1.01		sen+	Os09g0280300
Zm00001d005146	-3.51		sen-	Os07g0287400
Zm00001d005148	2.45		sen+
Zm00001d005158	1		sen+	Os07g0442900
Zm00001d005159		-0.74	tol-	Os07g0408700
Zm00001d005161	-1.5		sen-	Os07g0409200
Zm00001d005164	0.94		sen+	Os07g0409900
Zm00001d005169	1.11		sen+	Os07g0417800
Zm00001d005241	-3.75		sen-
Zm00001d005279	-5.92		sen-
Zm00001d005306	1.62		sen+
Zm00001d005308	1.66		sen+	Os09g0572200
Zm00001d005337	2.75		sen+
Zm00001d005343	1.37		sen+	Os09g0567900
Zm00001d005346	-2.43		sen-	Os09g0567366
Zm00001d005351	0.78		sen+	Os09g0565700
Zm00001d005359	-1.16		sen-	Os03g0428800
Zm00001d005392	0.84		sen+	Os02g0590400
Zm00001d005423	1.3		sen+	Os01g0530366
Zm00001d005442		0.48	tol+	Os07g0436100
Zm00001d005446	-1.88		sen-
Zm00001d005450	-0.85		sen-	Os03g0844100
Zm00001d005451	-1.14	-2.09		Os07g0424400
Zm00001d005457	-1.07		sen-	Os07g0243150
Zm00001d005458	-1.87		sen-	Os06g0107700
Zm00001d005459	1.95		sen+	Os07g0245100
Zm00001d005460	1.88	-0.61	sen+/tol-	Os07g0246200
Zm00001d005482	-0.83		sen-	Os07g0260300
Zm00001d005504	1.22		sen+	Os09g0281700
Zm00001d005539	1.19		sen+	Os09g0297000
Zm00001d005542	1.24		sen+
Zm00001d005544	-1.77		sen-
Zm00001d005546	1.73		sen+	Os09g0298200
Zm00001d005550		-0.97	tol-	Os10g0569100
Zm00001d005563	-1.47		sen-	Os09g0307800
Zm00001d005578		-1.13	tol-	Os09g0306400
Zm00001d005579	-1.03		sen-	Os09g0308900
Zm00001d005587	2.21		sen+	Os10g0327300
Zm00001d005609	3.58		sen+	Os09g0325700
Zm00001d005624	-2.11		sen-	Os09g0338500
Zm00001d005630	-2.61		sen-	Os09g0344900
Zm00001d005642	-0.9		sen-
Zm00001d005654	1.98		sen+	Os09g0364400
Zm00001d005657	-1.46		sen-	Os09g0367900
Zm00001d005658	-2.65		sen-	Os09g0369400
Zm00001d005664	-1.87		sen-	Os09g0370500
Zm00001d005682		-2.86	tol-	Os09g0375600
Zm00001d005685	-5.85		sen-
Zm00001d005687	0.99		sen+	Os09g0376800
Zm00001d005692		-1.46	tol-	Os09g0379600
Zm00001d005693	-1.27		sen-	Os10g0213700
Zm00001d005694	-1.6		sen-	Os09g0382400
Zm00001d005698	1.83		sen+	Os09g0385700
Zm00001d005719	2.19		sen+
Zm00001d005726	1.03		sen+	Os09g0401300
Zm00001d005742		-3.81	tol-
Zm00001d005775		-4.88	tol-	Os09g0422500
Zm00001d005785	-1.3		sen-	Os09g0431600
Zm00001d005791	-1.86		sen-	Os04g0583600
Zm00001d005804		1.14	tol+
Zm00001d005807	-5.96		sen-	Os09g0438100
Zm00001d005812	-1.39		sen-	Os09g0439000
Zm00001d005813	3.02		sen+	Os09g0439200
Zm00001d005814	-1.81		sen-	Os09g0439500
Zm00001d005818	1.72		sen+	Os09g0440300
Zm00001d005819	1.39		sen+	Os09g0440700
Zm00001d005826	1.66		sen+	Os09g0442600
Zm00001d005833	-2.68		sen-
Zm00001d005837	-4.43		sen-	Os09g0445500
Zm00001d005874	2.48		sen+	Os09g0448500
Zm00001d005881	-1.98		sen-	Os09g0456100
Zm00001d005888	1.66		sen+	Os09g0456800
Zm00001d005890	1.1		sen+	Os09g0457600
Zm00001d005912	1.45		sen+	Os09g0462700
Zm00001d005920	1.1		sen+	Os09g0464000
Zm00001d005923	1.55		sen+	Os09g0464300
Zm00001d005936	2.23		sen+	Os09g0468300
Zm00001d005945	-4.04		sen-
Zm00001d005950	-1.85		sen-	Os09g0469950
Zm00001d005951	-4.32		sen-	Os09g0470500
Zm00001d005972	-0.87		sen-	Os11g0672600
Zm00001d005978	1.1		sen+	Os09g0478600
Zm00001d005981	-2.22		sen-	Os09g0480400
Zm00001d005983	-1.18		sen-
Zm00001d005996	-1.09		sen-	Os09g0481200
Zm00001d005998	1.3		sen+	Os09g0481400
Zm00001d006001	1.21	-0.65	sen+/tol-
Zm00001d006002	-1.98		sen-	Os09g0481800
Zm00001d006028	-2.93		sen-
Zm00001d006034	0.71		sen+	Os09g0491708
Zm00001d006041	1.29		sen+
Zm00001d006060	1.41		sen+	Os09g0499300
Zm00001d006064	-1.2		sen-	Os09g0501200
Zm00001d006065	-3.53		sen-	Os09g0501600
Zm00001d006098	-2.47	-0.67	ΔLFC>1	Os07g0474600
Zm00001d006100	-1.31		sen-	Os08g0326400
Zm00001d006102	1.19		sen+	Os09g0508300
Zm00001d006107	0.89		sen+	Os09g0509200
Zm00001d006109	1.28		sen+
Zm00001d006115	0.78		sen+	Os09g0513200
Zm00001d006159	-2.08	-0.68	ΔLFC>1	Os04g0379400
Zm00001d006166	0.94		sen+	Os09g0521400
Zm00001d006182	1.23		sen+	Os09g0529900
Zm00001d006210	3.9		sen+	Os09g0531800
Zm00001d006211	3.28		sen+	Os09g0532000
Zm00001d006256	0.92		sen+	Os09g0542900
Zm00001d006257	-1.05		sen-	Os09g0543100
Zm00001d006270	1.17		sen+	Os09g0544900
Zm00001d006287	-1.77		sen-	Os02g0622300
Zm00001d006296	-0.81		sen-	Os03g0335600
Zm00001d006322	-0.94		sen-	Os09g0556500
Zm00001d006323	-1.34		sen-	Os09g0556700
Zm00001d006328	1.06		sen+	Os09g0557800
Zm00001d006329	1.75		sen+	Os09g0558100
Zm00001d006330	0.69		sen+	Os02g0314600
Zm00001d006340	-1.21		sen-
Zm00001d006343	-2.38		sen-	Os09g0560850
Zm00001d006347	-1.47		sen-	Os07g0467600
Zm00001d006377	-0.92		sen-	Os07g0485400
Zm00001d006388	-1.38		sen-	Os05g0274900
Zm00001d006389	1.07		sen+	Os07g0486500
Zm00001d006398	-2.17		sen-	Os07g0489800
Zm00001d006417	2.34		sen+
Zm00001d006419	2.51		sen+	Os07g0498900
Zm00001d006420	2.79		sen+	Os07g0498400
Zm00001d006443	-2.33		sen-	Os07g0492100
Zm00001d006446		-3.02	tol-	Os02g0589400
Zm00001d006447		2.06	tol+	Os07g0501700
Zm00001d006454	-1.85	-1.92		Os07g0506600
Zm00001d006467	-1.42	-2.21		Os07g0509800
Zm00001d006470	-1.32		sen-	Os07g0510100
Zm00001d006481	-1.15		sen-	Os07g0516000
Zm00001d006504	-1.18		sen-	Os07g0520400
Zm00001d006510	-1.13		sen-
Zm00001d006511	-2.18	-2.19		Os07g0523400
Zm00001d006520	-1.82		sen-	Os07g0530600
Zm00001d006521		0.81	tol+	Os07g0530700
Zm00001d006526	2.94		sen+
Zm00001d006535	3.59		sen+	Os07g0538400
Zm00001d006536	3.05		sen+	Os07g0538400
Zm00001d006538	5.68		sen+	Os07g0539300
Zm00001d006539	-3.34		sen-	Os07g0543300
Zm00001d006540	-2.32		sen-	Os07g0544800
Zm00001d006553	-3.35		sen-	Os07g0546400
Zm00001d006565	0.93		sen+	Os07g0549700
Zm00001d006566	-3.49		sen-
Zm00001d006581	-4.72		sen-	Os07g0557700
Zm00001d006587	-1.77		sen-	Os07g0558400
Zm00001d006590	1.44		sen+	Os07g0560300
Zm00001d006592	-1.82		sen-	Os03g0592500
Zm00001d006601	-1.01		sen-	Os07g0563400
Zm00001d006610	-2.76		sen-	Os07g0565600
Zm00001d006620	-1.2		sen-	Os07g0568500
Zm00001d006624	-1.58		sen-	Os07g0568900
Zm00001d006628	0.97		sen+	Os07g0571100
Zm00001d006629	1.36		sen+	Os06g0225100
Zm00001d006630	-1.82		sen-	Os07g0571600
Zm00001d006631	-6.41		sen-	Os07g0571700
Zm00001d006651	-1.65		sen-	Os07g0574800
Zm00001d006657	-1.27		sen-	Os06g0658900
Zm00001d006663	-2.58		sen-	Os07g0577600
Zm00001d006672	-1.54		sen-	Os11g0298400
Zm00001d006678	-3.25		sen-	Os07g0580900
Zm00001d006681	1.24		sen+	Os07g0581300
Zm00001d006682	1.17		sen+	Os07g0581366
Zm00001d006684	-2.32		sen-	Os06g0216100
Zm00001d006685	-1.76		sen-	Os07g0687000
Zm00001d006701		-0.77	tol-	Os07g0583600
Zm00001d006711	1.12		sen+
Zm00001d006753	2.34		sen+
Zm00001d006759	1.45		sen+	Os07g0596600
Zm00001d006761	-1.09		sen-	Os07g0598200
Zm00001d006790		0.7	tol+	Os05g0143500
Zm00001d006793	1.1		sen+	Os07g0537400
Zm00001d006815	-1.7		sen-
Zm00001d006833	-1.92		sen-
Zm00001d006834	-1.37		sen-	Os07g0608100
Zm00001d006844	-0.97		sen-
Zm00001d006853	-1.73		sen-	Os07g0614000
Zm00001d006866	-3.14		sen-	Os07g0616200
Zm00001d006868	-1.01		sen-	Os07g0616500
Zm00001d006882	-1.97		sen-	Os07g0619200
Zm00001d006883	1.37		sen+	Os07g0619500
Zm00001d006886	-0.91		sen-	Os04g0117900
Zm00001d006889	-0.7		sen-	Os09g0565600
Zm00001d006900		-1.45	tol-	Os07g0622200
Zm00001d006903	1.34		sen+	Os07g0622900
Zm00001d006910	-1.69		sen-	Os07g0623600
Zm00001d006916	1.04		sen+	Os07g0626300
Zm00001d006944	0.74		sen+	Os07g0637000
Zm00001d006947	5.95		sen+	Os07g0635300
Zm00001d006948	5.24		sen+	Os07g0635300
Zm00001d006951	0.86		sen+	Os07g0632700
Zm00001d007012	-2.12	-1.1	ΔLFC>1	Os07g0631900
Zm00001d007018		0.64	tol+
Zm00001d007026	-1.69		sen-
Zm00001d007037		0.64	tol+	Os06g0315900
Zm00001d007042	0.98		sen+	Os07g0644100
Zm00001d007068	0.7		sen+	Os07g0655300
Zm00001d007070	1.42		sen+	Os07g0656100
Zm00001d007072	-1.15	0.7	sen-/tol+	Os07g0656700
Zm00001d007073	-2.43		sen-	Os07g0656900
Zm00001d007079		1.15	tol+
Zm00001d007092	-2.28		sen-	Os12g0541500
Zm00001d007102	0.7		sen+	Os07g0661600
Zm00001d007109	1.56		sen+	Os09g0554300
Zm00001d007113	1.4		sen+	Os07g0669100
Zm00001d007117		-0.54	tol-	Os07g0669200
Zm00001d007153	1.77		sen+	Os07g0673900
Zm00001d007158	0.99		sen+	Os07g0675000
Zm00001d007168		1.9	tol+	Os07g0679200
Zm00001d007172	1.89		sen+
Zm00001d007174	1.04		sen+
Zm00001d007183	-0.73		sen-	Os07g0681500
Zm00001d007185	-1.7		sen-	Os07g0682700
Zm00001d007194	0.95		sen+
Zm00001d007228	-1.78		sen-	Os07g0693800
Zm00001d007240	-1.04		sen-	Os07g0695100
Zm00001d007251		-2.21	tol-	Os11g0427700
Zm00001d007255	-3.56		sen-	Os11g0235200
Zm00001d007267	-1.8		sen-	Os11g0242800
Zm00001d007272		-3.1	tol-	Os11g0244600
Zm00001d007319	-3.06	1.29	sen-/tol+	Os02g0271000
Zm00001d007320	-0.96		sen-	Os11g0488600
Zm00001d007329	1		sen+
Zm00001d007341	2.94	1.49	ΔLFC<-1
Zm00001d007366	-1.96		sen-	Os03g0565200
Zm00001d007378		0.57	tol+	Os05g0177500
Zm00001d007383		-0.66	tol-	Os11g0525600
Zm00001d007394	-1.68		sen-	Os11g0528500
Zm00001d007403		-5.51	tol-
Zm00001d007417	-2.52		sen-
Zm00001d007420	2.03		sen+
Zm00001d007422	1.12		sen+	Os11g0540100
Zm00001d007436	0.77		sen+	Os11g0544700
Zm00001d007444	0.9		sen+
Zm00001d007454	-1.2		sen-	Os11g0549695
Zm00001d007462	1.69		sen+	Os11g0552000
Zm00001d007477		-0.69	tol-	Os11g0556400
Zm00001d007491	-3.68		sen-	Os04g0115650
Zm00001d007517		-1.6	tol-	Os02g0271000
Zm00001d007572	-2.45		sen-	Os11g0592400
Zm00001d007573	-1.41	-0.7		Os11g0592800
Zm00001d007633	1.32		sen+	Os11g0637501
Zm00001d007639	-1.28		sen-	Os11g0638000
Zm00001d007656	-1.12		sen-	Os03g0831500
Zm00001d007687	2.27		sen+
Zm00001d007702	2.26		sen+
Zm00001d007714	3.06		sen+	Os11g0679700
Zm00001d007716	-0.9	0.91	sen-/tol+	Os11g0683500
Zm00001d007718	4.32		sen+
Zm00001d007750	-1.44		sen-
Zm00001d007753	4.05		sen+
Zm00001d007763	0.72		sen+
Zm00001d007764	1.47		sen+	Os07g0194800
Zm00001d007774	-0.97		sen-	Os07g0191500
Zm00001d007785	-1.26		sen-	Os07g0187900
Zm00001d007789	-1.46	-0.54		Os04g0356600
Zm00001d007810	-0.92		sen-
Zm00001d007815	-1.21		sen-
Zm00001d007819	-1.26		sen-
Zm00001d007821	-2.04		sen-	Os04g0507500
Zm00001d007822	0.75		sen+	Os07g0181800
Zm00001d007823	0.71		sen+	Os03g0441500
Zm00001d007824	-1.15		sen-	Os07g0180900
Zm00001d007827		-1.95	tol-	Os07g0178800
Zm00001d007831	2.09		sen+	Os07g0175600
Zm00001d007838	-2.56		sen-	Os07g0172600
Zm00001d007839	1.12		sen+	Os07g0124600
Zm00001d007845	-2.53		sen-	Os07g0133500
Zm00001d007857	-1.26		sen-	Os07g0141400
Zm00001d007864	-2.27		sen-	Os07g0149900
Zm00001d007865	-1.44		sen-	Os07g0150100
Zm00001d007881	-1.21		sen-	Os07g0157900
Zm00001d007885	1.78		sen+	Os07g0159900
Zm00001d007886	-0.9		sen-	Os08g0337001
Zm00001d007891	1.7		sen+	Os12g0407000
Zm00001d007892	1.25		sen+	Os07g0170100
Zm00001d007905	-1.66		sen-	Os07g0163500
Zm00001d007907	-1.01		sen-	Os07g0163000
Zm00001d007918	-2.1		sen-	Os06g0204100
Zm00001d007921	-1.52		sen-	Os10g0100300
Zm00001d007934	-1.26		sen-	Os02g0103900
Zm00001d007936	-1.06	-0.81		Os07g0100200
Zm00001d007937	-2.37		sen-	Os07g0108300
Zm00001d007954	-1.79		sen-	Os07g0115700
Zm00001d007977	1.7		sen+	Os07g0123800
Zm00001d007992	-3.2		sen-
Zm00001d008017		0.77	tol+
Zm00001d008153	2.46		sen+
Zm00001d008178	-0.98	-0.96
Zm00001d008203	-2.36		sen-	Os01g0286600
Zm00001d008205	-1.32		sen-	Os01g0286100
Zm00001d008208		1.49	tol+	Os01g0284900
Zm00001d008209	-2.04	-1.4		Os01g0284700
Zm00001d008222		1.19	tol+	Os01g0281100
Zm00001d008228	-2.93		sen-	Os01g0278900
Zm00001d008230	-2.03		sen-	Os01g0279100
Zm00001d008238	-1.1		sen-	Os01g0276500
Zm00001d008244	0.9		sen+	Os01g0276100
Zm00001d008245	-0.94		sen-
Zm00001d008250	1.71		sen+	Os10g0205300
Zm00001d008258	1.97		sen+	Os01g0272600
Zm00001d008264	-0.95		sen-	Os01g0271000
Zm00001d008266	-2.23		sen-	Os01g0270300
Zm00001d008271	1.33		sen+	Os01g0269000
Zm00001d008278	0.82		sen+
Zm00001d008284	0.88		sen+
Zm00001d008285	1.84		sen+	Os01g0266800
Zm00001d008289	-0.94		sen-	Os01g0266000
Zm00001d008296		-1.42	tol-	Os01g0264600
Zm00001d008297	-1.09		sen-	Os01g0264500
Zm00001d008318	2.17		sen+
Zm00001d008327	-2.67	-0.99	ΔLFC>1	Os03g0370500
Zm00001d008329		-3.32	tol-	Os01g0256500
Zm00001d008330	-1.77		sen-
Zm00001d008340	1.9		sen+	Os01g0253900
Zm00001d008360	-1.14		sen-	Os01g0251100
Zm00001d008394	-1.31		sen-	Os01g0102300
Zm00001d008399	1.96		sen+	Os01g0104200
Zm00001d008405	1.01		sen+	Os01g0105800
Zm00001d008427	-0.87		sen-	Os01g0106900
Zm00001d008431	1.69		sen+
Zm00001d008432	1.65		sen+	Os01g0110400
Zm00001d008440	-3.07		sen-	Os01g0111100
Zm00001d008449		0.69	tol+	Os01g0111700
Zm00001d008455	1.27	0.74		Os01g0112500
Zm00001d008458	-2.05	0.68	sen-/tol+
Zm00001d008465	0.91		sen+	Os01g0117300
Zm00001d008468	1.17		sen+	Os01g0117300
Zm00001d008477	1.47		sen+
Zm00001d008485	1.25		sen+
Zm00001d008488	0.82		sen+
Zm00001d008491	1.79		sen+	Os01g0118000
Zm00001d008495	1.7		sen+
Zm00001d008497	-2.75		sen-	Os01g0120300
Zm00001d008512	-1.63		sen-	Os01g0121700
Zm00001d008545	-1.41		sen-
Zm00001d008546	-1.54		sen-	Os01g0131600
Zm00001d008548	2.69	-2.87	sen+/tol-	Os01g0132000
Zm00001d008549		-0.48	tol-	Os01g0127300
Zm00001d008552	1.74		sen+	Os01g0132500
Zm00001d008570	-4.24		sen-	Os01g0134700
Zm00001d008587	2.17		sen+	Os01g0138800
Zm00001d008588		-2.57	tol-	Os01g0138900
Zm00001d008594	-0.87		sen-	Os12g0150100
Zm00001d008596	0.73		sen+
Zm00001d008600	1.03	-1.77	sen+/tol-	Os01g0142300
Zm00001d008602	-0.73		sen-	Os01g0142500
Zm00001d008610	-3.42		sen-	Os01g0143800
Zm00001d008612	-2.76		sen-	Os01g0144100
Zm00001d008618		-0.81	tol-	Os01g0147700
Zm00001d008620	-2.31	-1.22	ΔLFC>1
Zm00001d008625	-1.33		sen-	Os01g0151200
Zm00001d008634	-2		sen-	Os01g0153800
Zm00001d008641	-1.27		sen-	Os01g0158100
Zm00001d008642	-1.07		sen-	Os01g0158200
Zm00001d008646	1.65		sen+	Os01g0158400
Zm00001d008651	1.65		sen+	Os01g0160100
Zm00001d008681	-2.07		sen-	Os03g0343900
Zm00001d008700	-2.32		sen-	Os01g0169800
Zm00001d008706	-1.62		sen-	Os12g0420400
Zm00001d008721	-1.67		sen-
Zm00001d008722	-2.49		sen-	Os01g0170900
Zm00001d008749	-1.41		sen-	Os01g0178500
Zm00001d008762	-1.35		sen-	Os04g0685100
Zm00001d008764	-2.11		sen-	Os01g0179600
Zm00001d008793	1.73	1.5		Os01g0186000
Zm00001d008794	3.77		sen+	Os01g0185900
Zm00001d008808		1.12	tol+	Os01g0192300
Zm00001d008819		2.34	tol+	Os01g0190500
Zm00001d008843	2.41		sen+	Os01g0194600
Zm00001d008846	-1.01		sen-	Os01g0185200
Zm00001d008849		1.1	tol+
Zm00001d008850	1.76		sen+	Os01g0195400
Zm00001d008902	1.36		sen+	Os06g0102300
Zm00001d008905	-3.07		sen-	Os01g0207400
Zm00001d008909	1.51		sen+	Os01g0209700
Zm00001d008923	1.71		sen+	Os01g0214500
Zm00001d008925	0.85		sen+	Os01g0215500
Zm00001d008929	-1.42		sen-	Os01g0215700
Zm00001d008933	-2.14		sen-	Os01g0217400
Zm00001d008940	-1.33		sen-	Os01g0218700
Zm00001d008941	-1		sen-	Os01g0218800
Zm00001d008962	-0.79		sen-
Zm00001d008963	-2.76		sen-	Os01g0221700
Zm00001d008965	1.68		sen+	Os01g0223600
Zm00001d008966	2.81		sen+	Os01g0223900
Zm00001d008974	1.25		sen+	Os01g0225000
Zm00001d008985	2.39		sen+	Os01g0227800
Zm00001d008987	3.1	-0.88	sen+/tol-	Os01g0227800
Zm00001d008992	1.05		sen+	Os01g0228300
Zm00001d008993	-1		sen-	Os01g0228800
Zm00001d008999	-1.58		sen-	Os01g0229500
Zm00001d009000	-1.54		sen-	Os07g0208000
Zm00001d009017	-1.68		sen-	Os01g0236700
Zm00001d009022	-3.56		sen-	Os01g0237500
Zm00001d009027	0.81		sen+	Os01g0239100
Zm00001d009028	-2.64		sen-	Os01g0239200
Zm00001d009029	-1.91		sen-	Os01g0239700
Zm00001d009057		-2.21	tol-	Os01g0296200
Zm00001d009071	-2.71		sen-	Os01g0314600
Zm00001d009084	2.78		sen+
Zm00001d009106		0.69	tol+
Zm00001d009117	-1.12		sen-	Os01g0304000
Zm00001d009118	2.8		sen+	Os01g0303800
Zm00001d009146		-0.74	tol-	Os07g0477250
Zm00001d009150	0.71		sen+	Os01g0321700
Zm00001d009152	-0.98		sen-	Os01g0319000
Zm00001d009161	-1.21		sen-	Os01g0328500
Zm00001d009177	-1.94		sen-	Os01g0332100
Zm00001d009182	1.02		sen+	Os01g0348600
Zm00001d009189	-1.71		sen-
Zm00001d009193	-0.97		sen-	Os01g0343300
Zm00001d009212	-0.84		sen-	Os05g0156700
Zm00001d009222	2.54		sen+	Os01g0337500
Zm00001d009247	-1.61		sen-	Os02g0670500
Zm00001d009248	-7.6		sen-	Os01g0360200
Zm00001d009267	-1.82		sen-
Zm00001d009271	-1.11		sen-	Os01g0372700
Zm00001d009296		-4.27	tol-	Os01g0382000
Zm00001d009328	1.41		sen+	Os01g0498300
Zm00001d009339	-1.32		sen-	Os01g0507900
Zm00001d009365	1.47		sen+
Zm00001d009404	-1.68	-0.88		Os01g0555200
Zm00001d009407	0.89		sen+	Os05g0539900
Zm00001d009413		0.61	tol+	Os05g0541700
Zm00001d009416	-1.56		sen-
Zm00001d009417	-1.23		sen-	Os02g0821200
Zm00001d009431	2.04		sen+	Os05g0543400
Zm00001d009475	-1.6		sen-
Zm00001d009480	-1.66		sen-	Os05g0552300
Zm00001d009481	-1.02	0.48	sen-/tol+	Os05g0552100
Zm00001d009493	1.36		sen+	Os05g0553800
Zm00001d009494	2.45		sen+	Os05g0554000
Zm00001d009497		0.72	tol+	Os05g0554400
Zm00001d009503	-1.85		sen-
Zm00001d009509	-1.17		sen-	Os05g0557000
Zm00001d009511		-0.61	tol-	Os05g0557500
Zm00001d009560	-3.1		sen-
Zm00001d009566	-2.05		sen-	Os05g0563550
Zm00001d009567	-1.96		sen-
Zm00001d009568	1.9	-0.76	sen+/tol-
Zm00001d009578	1.03		sen+	Os05g0564800
Zm00001d009579	-0.96		sen-	Os05g0565000
Zm00001d009580	0.97		sen+	Os05g0565200
Zm00001d009582	-2.82		sen-	Os05g0565500
Zm00001d009589	-4.7		sen-
Zm00001d009594	1.08		sen+	Os05g0567100
Zm00001d009596	-1.75		sen-	Os05g0567300
Zm00001d009605	-1.63		sen-
Zm00001d009613	-0.89		sen-	Os05g0568900
Zm00001d009618	-1.06		sen-	Os05g0571100
Zm00001d009626	2.84		sen+	Os05g0572700
Zm00001d009631	1.04		sen+	Os05g0573300
Zm00001d009638		-0.74	tol-	Os05g0573700
Zm00001d009640		-0.55	tol-	Os05g0574400
Zm00001d009641	-1.41		sen-	Os01g0706700
Zm00001d009647	2.52		sen+	Os05g0576600
Zm00001d009652	-1.14		sen-	Os01g0191100
Zm00001d009653	-1.23		sen-	Os01g0191100
Zm00001d009666	1.27		sen+	Os05g0578500
Zm00001d009686	-2.39	1.06	sen-/tol+	Os05g0581900
Zm00001d009698		-2.56	tol-
Zm00001d009700	1.41	-0.83	sen+/tol-	Os05g0584200
Zm00001d009702	1.27		sen+	Os05g0584600
Zm00001d009709		-0.97	tol-
Zm00001d009714	1.04		sen+	Os05g0586200
Zm00001d009723	-1.23		sen-
Zm00001d009724	3.32		sen+	Os07g0546600
Zm00001d009726	-2.01		sen-	Os05g0588100
Zm00001d009733	-1.34		sen-	Os10g0495400
Zm00001d009740		-0.44	tol-	Os05g0589600
Zm00001d009745	-1.66		sen-	Os05g0592400
Zm00001d009775	-2.98		sen-	Os05g0596000
Zm00001d009783	1		sen+	Os05g0156500
Zm00001d009794		-1.43	tol-
Zm00001d009795	-1.38		sen-	Os05g0176100
Zm00001d009797	1.49		sen+	Os05g0171900
Zm00001d009800	-1.11		sen-	Os05g0170800
Zm00001d009810	-1.88		sen-	Os05g0170000
Zm00001d009811	-1.51		sen-	Os05g0168800
Zm00001d009820	-2.46		sen-	Os05g0165500
Zm00001d009848	-0.93		sen-	Os05g0155100
Zm00001d009858	1.52	-1.05	sen+/tol-	Os05g0320700
Zm00001d009868	-1.35		sen-	Os03g0178000
Zm00001d009877	-2.4		sen-	Os05g0291700
Zm00001d009899		-2.15	tol-	Os05g0361500
Zm00001d009902	1.35		sen+	Os05g0362300
Zm00001d009907	1.56		sen+	Os05g0363100
Zm00001d009908	1.2		sen+	Os05g0363200
Zm00001d009918		0.54	tol+	Os05g0365000
Zm00001d009927	-0.75		sen-
Zm00001d009928	-1.06		sen-
Zm00001d009929	-2.4		sen-	Os05g0401100
Zm00001d009936		-1.14	tol-
Zm00001d009952	-1.48	-1.81		Os05g0180300
Zm00001d009967	-1.09		sen-	Os05g0387200
Zm00001d009975	-1.94		sen-	Os05g0385400
Zm00001d009978	0.79		sen+	Os05g0383000
Zm00001d009983	-1.22		sen-
Zm00001d010000	-1.33		sen-	Os05g0200100
Zm00001d010016	-1.56		sen-	Os05g0207300
Zm00001d010033	0.71		sen+	Os05g0354400
Zm00001d010039	-2.39		sen-	Os05g0244500
Zm00001d010052	2.08		sen+	Os05g0456900
Zm00001d010056	0.97	-0.63	sen+/tol-	Os05g0455500
Zm00001d010066	-1.49		sen-	Os05g0453300
Zm00001d010075	-1.34		sen-	Os05g0447700
Zm00001d010079	-1.28		sen-	Os05g0449200
Zm00001d010137	0.71		sen+
Zm00001d010159	1.98		sen+	Os05g0438800
Zm00001d010172	1.64		sen+
Zm00001d010183	1.08		sen+	Os05g0435400
Zm00001d010190	1.74		sen+
Zm00001d010197	1.35		sen+	Os05g0430800
Zm00001d010201	2.79		sen+	Os05g0429900
Zm00001d010204	-1.62		sen-	Os05g0429500
Zm00001d010235	-0.9		sen-	Os05g0420800
Zm00001d010236	0.83		sen+	Os05g0420600
Zm00001d010240	-1.95		sen-	Os05g0419000
Zm00001d010258	-2.21		sen-	Os01g0832900
Zm00001d010259	-1.26		sen-	Os05g0417200
Zm00001d010261	-1.47		sen-
Zm00001d010282	0.8		sen+	Os05g0411600
Zm00001d010287	3.31		sen+	Os05g0409500
Zm00001d010313	-1.35		sen-	Os05g0406100
Zm00001d010314	-1.37		sen-	Os05g0406000
Zm00001d010319	1.84		sen+	Os05g0405600
Zm00001d010321	-3.22		sen-	Os05g0405000
Zm00001d010336	-1.32		sen-	Os05g0404200
Zm00001d010340	-1.08		sen-	Os05g0404000
Zm00001d010368	1.04		sen+	Os05g0187800
Zm00001d010373	-4.21		sen-
Zm00001d010375		-1.4	tol-	Os05g0194900
Zm00001d010380	1.91		sen+	Os05g0195200
Zm00001d010399	1.25		sen+	Os05g0343400
Zm00001d010411	-3.17		sen-	Os05g0230700
Zm00001d010424	-0.97		sen-	Os05g0220600
Zm00001d010426	-2.41		sen-	Os05g0222200
Zm00001d010448	1.05		sen+	Os05g0305900
Zm00001d010451	-2.16		sen-	Os05g0209600
Zm00001d010455	0.82		sen+	Os05g0315200
Zm00001d010459		-4.16	tol-	Os11g0113700
Zm00001d010463	1.55		sen+	Os05g0390000
Zm00001d010466		-0.62	tol-	Os05g0391600
Zm00001d010478	1.57		sen+	Os05g0392700
Zm00001d010491	0.8		sen+	Os05g0372000
Zm00001d010510	-1.78		sen-
Zm00001d010512	-1.73		sen-	Os05g0353400
Zm00001d010519	0.96		sen+	Os05g0457700
Zm00001d010520	1.85		sen+	Os05g0457800
Zm00001d010527	-2.64		sen-	Os05g0459700
Zm00001d010528	-0.86		sen-	Os05g0459900
Zm00001d010536	-0.87		sen-	Os05g0460800
Zm00001d010566	-1.26		sen-
Zm00001d010567	-0.97		sen-	Os05g0464100
Zm00001d010579	1.08		sen+	Os05g0467000
Zm00001d010586	6.76		sen+	Os05g0468800
Zm00001d010594	1.86		sen+	Os05g0471350
Zm00001d010617	3.65		sen+	Os05g0478800
Zm00001d010622	-1.07		sen-	Os05g0481500
Zm00001d010627	-2.07		sen-	Os05g0484800
Zm00001d010632	1.19		sen+	Os05g0487300
Zm00001d010635	0.97		sen+	Os05g0488800
Zm00001d010639	1.04		sen+	Os05g0490200
Zm00001d010649	2.25		sen+	Os05g0491000
Zm00001d010672	-2.84	-0.86	ΔLFC>1	Os05g0496200
Zm00001d010693		-0.83	tol-	Os05g0500500
Zm00001d010715	-1.73		sen-
Zm00001d010722	2.02		sen+	Os05g0511050
Zm00001d010723	1.07		sen+	Os05g0511000
Zm00001d010755	-1.94		sen-
Zm00001d010759		0.68	tol+	Os05g0519000
Zm00001d010791	-2.64		sen-
Zm00001d010796	0.84		sen+	Os05g0522500
Zm00001d010799	-1.86		sen-	Os09g0531100
Zm00001d010802	-1.59		sen-
Zm00001d010804	0.71		sen+	Os02g0801200
Zm00001d010814	3.52		sen+	Os05g0531100
Zm00001d010821	-0.7		sen-	Os05g0533600
Zm00001d010822	-2.29		sen-	Os05g0534100
Zm00001d010828	4.23		sen+
Zm00001d010842	-1.04		sen-	Os02g0116100
Zm00001d010852	-0.96		sen-	Os05g0151400
Zm00001d010863	-1.11		sen-	Os05g0150500
Zm00001d010871	-1.14		sen-	Os01g0913000
Zm00001d010918		0.76	tol+	Os05g0135900
Zm00001d010924	-3.33		sen-	Os05g0135400
Zm00001d010945	1.13		sen+	Os05g0130100
Zm00001d010957	-4.52		sen-	Os05g0131500
Zm00001d010961	1.64		sen+	Os05g0127300
Zm00001d010970	1.14		sen+	Os05g0125500
Zm00001d010982	-1.22		sen-	Os05g0122800
Zm00001d010985	-3.15		sen-	Os05g0121900
Zm00001d010987		-0.9	tol-	Os05g0121600
Zm00001d010988		-0.7	tol-
Zm00001d011001		1.94	tol+	Os05g0119000
Zm00001d011041	3.3		sen+	Os05g0115100
Zm00001d011060		-0.95	tol-	Os05g0112000
Zm00001d011066	0.86		sen+	Os05g0110900
Zm00001d011069	-1.2		sen-	Os05g0110300
Zm00001d011080	1.56		sen+	Os12g0548700
Zm00001d011093	-1.26		sen-
Zm00001d011096	-1.08		sen-	Os04g0566500
Zm00001d011104	-1.18	-0.59		Os05g0103200
Zm00001d011108	-1.47		sen-
Zm00001d011119	1.01		sen+	Os05g0101200
Zm00001d011124		-0.62	tol-	Os05g0157300
Zm00001d011131	1.1		sen+	Os05g0537400
Zm00001d011132	1.08		sen+
Zm00001d011138	-1.79		sen-	Os05g0535900
Zm00001d011147	-2.37		sen-	Os09g0570400
Zm00001d011154	-3.09		sen-	Os07g0168300
Zm00001d011164	3.22		sen+	Os01g0558700
Zm00001d011183		-1.16	tol-	Os07g0529600
Zm00001d011192	-1.25		sen-	Os01g0570700
Zm00001d011193	2.2		sen+	Os01g0585100
Zm00001d011195	0.71		sen+	Os04g0321800
Zm00001d011199	-1.9		sen-	Os01g0583200
Zm00001d011207		0.57	tol+
Zm00001d011210	-1.33		sen-	Os01g0581400
Zm00001d011217	-1.02		sen-	Os01g0574800
Zm00001d011231	0.84		sen+	Os01g0585600
Zm00001d011256	-2.34		sen-
Zm00001d011275	1.07		sen+	Os01g0595400
Zm00001d011285	-5.3		sen-	Os01g0600900
Zm00001d011297	-2.4	1.47	sen-/tol+	Os01g0603300
Zm00001d011299	1.44		sen+	Os09g0256600
Zm00001d011311	-3.81		sen-	Os01g0607800
Zm00001d011347	1.59		sen+	Os01g0614900
Zm00001d011349	1.09		sen+	Os01g0615300
Zm00001d011362	-1.23		sen-	Os01g0617900
Zm00001d011365	3.46		sen+	Os01g0618700
Zm00001d011366	-0.67		sen-	Os01g0618800
Zm00001d011369	-2.13		sen-	Os01g0618900
Zm00001d011378	2.34		sen+	Os01g0621600
Zm00001d011386	-1.77		sen-	Os01g0622300
Zm00001d011387	-1.75		sen-	Os01g0622300
Zm00001d011393	3.3		sen+	Os01g0623200
Zm00001d011405		-1.72	tol-
Zm00001d011413	1.47		sen+	Os01g0626400
Zm00001d011428		-1.32	tol-	Os01g0631200
Zm00001d011433	-1.86		sen-	Os01g0631700
Zm00001d011436	-1.3		sen-
Zm00001d011438	2.57		sen+	Os01g0633500
Zm00001d011448	-0.95		sen-	Os12g0236900
Zm00001d011454	-1.09		sen-	Os01g0639900
Zm00001d011467	-1.63		sen-	Os01g0644000
Zm00001d011473		2.58	tol+	Os01g0648000
Zm00001d011474	0.73		sen+
Zm00001d011487	0.95		sen+	Os01g0654500
Zm00001d011513	-2.48		sen-
Zm00001d011518	-1.77		sen-	Os01g0664000
Zm00001d011531	-1.04		sen-	Os01g0666400
Zm00001d011569	-0.99		sen-	Os01g0673800
Zm00001d011579	-1.15		sen-	Os01g0674700
Zm00001d011580	1.32		sen+	Os01g0674800
Zm00001d011585	-2.23		sen-	Os01g0680600
Zm00001d011596	-1.78		sen-	Os01g0678600
Zm00001d011602	1.19		sen+	Os01g0679900
Zm00001d011619	0.91		sen+	Os01g0688200
Zm00001d011624		0.66	tol+
Zm00001d011644	-2.72		sen-	Os01g0290700
Zm00001d011648	-1.09		sen-	Os05g0349500
Zm00001d011649		-1.17	tol-	Os01g0697100
Zm00001d011650		-0.56	tol-	Os01g0698000
Zm00001d011655	1.78		sen+	Os01g0699400
Zm00001d011656	4.93		sen+	Os01g0699500
Zm00001d011657	-1.82		sen-	Os01g0699900
Zm00001d011673	-3.17		sen-	Os01g0703400
Zm00001d011679		1.37	tol+	Os01g0704100
Zm00001d011685	-2.28		sen-	Os01g0706700
Zm00001d011709	-1.35		sen-	Os01g0712600
Zm00001d011720	0.84		sen+	Os01g0716400
Zm00001d011721	-2.12		sen-	Os01g0718300
Zm00001d011734		-2.86	tol-	Os01g0720400
Zm00001d011735	2.26		sen+
Zm00001d011740	-0.82		sen-	Os01g0723100
Zm00001d011741	-0.78		sen-	Os01g0723200
Zm00001d011746	-2.16		sen-	Os01g0725800
Zm00001d011752	4.35		sen+	Os01g0727700
Zm00001d011753	2.26		sen+	Os01g0728150
Zm00001d011756	1.18		sen+	Os01g0729100
Zm00001d011760	-1.25		sen-	Os01g0730500
Zm00001d011761	-1.61		sen-	Os01g0730800
Zm00001d011764	-1.58		sen-	Os01g0732700
Zm00001d011767	1.21		sen+	Os02g0195300
Zm00001d011771	-1.82		sen-
Zm00001d011779	-0.97		sen-	Os03g0685600
Zm00001d011780	-1.41		sen-	Os01g0973400
Zm00001d011788	-4.32		sen-	Os01g0970900
Zm00001d011790	-1.44		sen-	Os01g0970600
Zm00001d011797	-0.77		sen-	Os01g0966200
Zm00001d011799	0.99		sen+	Os01g0965900
Zm00001d011803	-0.97		sen-	Os01g0965400
Zm00001d011813	-2.53		sen-	Os01g0963600
Zm00001d011816	-0.98		sen-	Os01g0962600
Zm00001d011819	-0.97		sen-	Os10g0567400
Zm00001d011826	-1.67		sen-	Os01g0959900
Zm00001d011829	-1.21		sen-	Os01g0958900
Zm00001d011831	0.95		sen+	Os01g0958700
Zm00001d011833	-1.27		sen-	Os02g0103800
Zm00001d011838	2.16		sen+	Os11g0575500
Zm00001d011843	2.45		sen+	Os01g0954500
Zm00001d011845	1.69		sen+	Os01g0954000
Zm00001d011849	1.25	-0.99	sen+/tol-	Os01g0952500
Zm00001d011887	-1.58		sen-	Os01g0940600
Zm00001d011891	-1.38		sen-	Os01g0939700
Zm00001d011901	-1.43		sen-
Zm00001d011904	-1.7		sen-	Os01g0936800
Zm00001d011913	-1.52		sen-	Os01g0935500
Zm00001d011917	-1.48		sen-
Zm00001d011927	1.09		sen+	Os01g0931300
Zm00001d011929		0.62	tol+	Os01g0931100
Zm00001d011931	-1.24		sen-	Os06g0576600
Zm00001d011938	0.86		sen+	Os01g0930200
Zm00001d011953	-1.59		sen-	Os01g0927600
Zm00001d011958	0.84		sen+	Os02g0319300
Zm00001d011965	2.03		sen+	Os01g0926300
Zm00001d011969	1.72		sen+	Os01g0925400
Zm00001d011971	1.31		sen+	Os01g0925200
Zm00001d011993	-1.74		sen-	Os01g0924000
Zm00001d012003	-1.3		sen-	Os07g0271600
Zm00001d012005		0.68	tol+	Os01g0923700
Zm00001d012010	1.07		sen+	Os01g0923000
Zm00001d012013	-4.15		sen-
Zm00001d012029	-0.93		sen-	Os01g0920300
Zm00001d012031	-1		sen-	Os01g0920100
Zm00001d012033	-2.07		sen-	Os01g0919900
Zm00001d012036	-3.71		sen-	Os01g0919400
Zm00001d012047	-3.35		sen-
Zm00001d012067	-1		sen-
Zm00001d012083	-1.33		sen-	Os01g0912700
Zm00001d012087	-1.97		sen-	Os01g0911000
Zm00001d012101	0.87		sen+	Os01g0908700
Zm00001d012121	0.7		sen+	Os10g0486900
Zm00001d012128	-2.26		sen-	Os01g0904700
Zm00001d012141	-3.04		sen-	Os01g0901900
Zm00001d012161	-1.48		sen-	Os01g0896700
Zm00001d012167		-2.86	tol-	Os01g0896200
Zm00001d012178	-2.66		sen-	Os01g0889800
Zm00001d012204	-0.84		sen-	Os01g0885200
Zm00001d012211		-1.32	tol-	Os01g0883900
Zm00001d012212	1.93		sen+	Os01g0883800
Zm00001d012220		1.81	tol+	Os01g0881100
Zm00001d012224	-2.43		sen-	Os01g0880200
Zm00001d012226	-2.22		sen-	Os01g0879500
Zm00001d012228	0.82	-0.64	sen+/tol-	Os01g0878800
Zm00001d012229	2.54		sen+	Os01g0878700
Zm00001d012247		-0.62	tol-	Os01g0874900
Zm00001d012255	2.38		sen+	Os01g0874300
Zm00001d012257	-2.03		sen-	Os01g0873900
Zm00001d012258	1.58		sen+	Os12g0506700
Zm00001d012275	0.74		sen+	Os01g0866300
Zm00001d012285	2.74		sen+	Os01g0863300
Zm00001d012287	-1.5		sen-	Os01g0862200
Zm00001d012292	4.51		sen+	Os01g0860800
Zm00001d012294		-2.08	tol-	Os01g0859500
Zm00001d012296	5.47		sen+	Os01g0859300
Zm00001d012302	1.46		sen+	Os01g0858900
Zm00001d012304	2.12		sen+	Os05g0445100
Zm00001d012312	-2.5		sen-	Os01g0857200
Zm00001d012321	1.21		sen+	Os01g0855600
Zm00001d012322	3.08		sen+
Zm00001d012325	-4.03	-1.76	ΔLFC>1	Os01g0855200
Zm00001d012337	-1.74		sen-	Os01g0853700
Zm00001d012338		0.67	tol+	Os01g0853400
Zm00001d012353	-1.72		sen-	Os04g0691600
Zm00001d012362		0.55	tol+	Os01g0851100
Zm00001d012394	-2.69		sen-	Os12g0626400
Zm00001d012401	3	0.92	ΔLFC<-1	Os01g0846300
Zm00001d012414	-3.95		sen-	Os01g0844200
Zm00001d012415	-6.35		sen-	Os01g0844500
Zm00001d012420	1.36		sen+
Zm00001d012426	2.45	-2.39	sen+/tol-	Os01g0839200
Zm00001d012427	4.72		sen+	Os01g0839100
Zm00001d012438	-1.76		sen-	Os01g0836600
Zm00001d012450	2.03		sen+	Os01g0833400
Zm00001d012480	-1.69		sen-	Os01g0826800
Zm00001d012485		-1.54	tol-	Os01g0825800
Zm00001d012486	-1.94		sen-	Os04g0202500
Zm00001d012510	1.71		sen+	Os01g0820000
Zm00001d012527	1.37	-0.51	sen+/tol-	Os01g0816100
Zm00001d012529	-0.97		sen-	Os01g0815700
Zm00001d012532	0.85		sen+	Os01g0814400
Zm00001d012533	1.09		sen+	Os01g0814400
Zm00001d012535	-3.24		sen-	Os01g0814100
Zm00001d012556	-4.29		sen-
Zm00001d012557	-0.93		sen-	Os01g0805800
Zm00001d012561	1.35		sen+	Os01g0803200
Zm00001d012562	1.25		sen+	Os01g0802850
Zm00001d012567	2.34		sen+	Os01g0801600
Zm00001d012578	2.19	0.82	ΔLFC<-1	Os01g0799500
Zm00001d012585	-2.73		sen-	Os01g0797600
Zm00001d012591	4.21		sen+	Os01g0794400
Zm00001d012593	-1.44		sen-
Zm00001d012598	-1.03		sen-	Os09g0568800
Zm00001d012603	2.78		sen+	Os01g0787600
Zm00001d012604	1.52		sen+	Os01g0787400
Zm00001d012607	1.76		sen+	Os01g0784800
Zm00001d012612	-3.29		sen-	Os01g0783100
Zm00001d012646	-1.37		sen-	Os01g0930000
Zm00001d012647	1		sen+	Os01g0772400
Zm00001d012662	1.13		sen+	Os01g0767600
Zm00001d012664	0.97		sen+	Os01g0766200
Zm00001d012673	-2.21		sen-	Os08g0172200
Zm00001d012684	-1.77		sen-	Os01g0762900
Zm00001d012686	-1.5	0.82	sen-/tol+	Os01g0762300
Zm00001d012687	1.75		sen+	Os01g0762000
Zm00001d012689	-0.79		sen-	Os01g0761000
Zm00001d012702	1.58		sen+	Os01g0758300
Zm00001d012707		-2.2	tol-
Zm00001d012708	-1.78		sen-	Os01g0757700
Zm00001d012719	-3.07		sen-	Os01g0756200
Zm00001d012720	-1.89		sen-	Os01g0755700
Zm00001d012725	-1.68		sen-	Os01g0755500
Zm00001d012729	-1.19		sen-	Os01g0754000
Zm00001d012731	-1.34		sen-	Os01g0753500
Zm00001d012757	4.11		sen+	Os05g0520300
Zm00001d012764	10.36		sen+	Os01g0743500
Zm00001d012765	-1.5		sen-	Os01g0743300
Zm00001d012771	-1.83		sen-	Os01g0742000
Zm00001d012782	2.44		sen+	Os01g0735900
Zm00001d012786	-1.8		sen-
Zm00001d012787	-1.44		sen-	Os12g0533700
Zm00001d012809	0.82		sen+	Os03g0589300
Zm00001d012810	-0.85		sen-	Os08g0242800
Zm00001d012820	-0.86		sen-	Os03g0855600
Zm00001d012824	1.29		sen+	Os03g0854400
Zm00001d012826	-1.37		sen-	Os03g0854200
Zm00001d012834	1.49		sen+	Os03g0852200
Zm00001d012846	-1.56		sen-	Os03g0851100
Zm00001d012850	1.73	-1	sen+/tol-	Os03g0849800
Zm00001d012862	-2.15		sen-	Os03g0844000
Zm00001d012868	-3.14		sen-	Os03g0841900
Zm00001d012869	-1.29		sen-	Os03g0841800
Zm00001d012878	-0.81		sen-
Zm00001d012880	-2.18		sen-	Os04g0278000
Zm00001d012883	-4.38		sen-	Os03g0839200
Zm00001d012898	-0.92		sen-	Os03g0830900
Zm00001d012899	1.87		sen+	Os03g0830300
Zm00001d012907	2.74		sen+	Os03g0829200
Zm00001d012909	2.45		sen+	Os03g0829200
Zm00001d012919	1.85		sen+
Zm00001d012920	1.98		sen+
Zm00001d012922	-1.92		sen-	Os03g0827700
Zm00001d012937	-2.33		sen-
Zm00001d012954	1.71		sen+
Zm00001d012968	3.86		sen+
Zm00001d012972	2.55		sen+	Os03g0819600
Zm00001d012973	-1.35	-0.89		Os03g0819400
Zm00001d012975	2.18		sen+	Os03g0819300
Zm00001d012978	-1.25	-1.24		Os03g0818400
Zm00001d012988	-1.77		sen-	Os03g0817100
Zm00001d012992	-1.33		sen-	Os03g0816200
Zm00001d012998	-2.24		sen-	Os03g0815400
Zm00001d013003	4.07		sen+
Zm00001d013013	-1.77		sen-	Os03g0811100
Zm00001d013021	-3.02	-3.19
Zm00001d013022	-3.79		sen-
Zm00001d013029	-1.94		sen-	Os04g0312100
Zm00001d013033		0.74	tol+	Os03g0807900
Zm00001d013034	-1.28		sen-
Zm00001d013039	-2.79		sen-	Os08g0560900
Zm00001d013042	-1.39		sen-	Os03g0806700
Zm00001d013054	-3.57		sen-	Os03g0803200
Zm00001d013067	-0.75		sen-	Os03g0799000
Zm00001d013073	-2.17		sen-	Os03g0797600
Zm00001d013076	-1.48		sen-	Os03g0796501
Zm00001d013081	-2.5		sen-	Os03g0795200
Zm00001d013086	-0.99		sen-	Os03g0794700
Zm00001d013087		1.41	tol+	Os03g0794300
Zm00001d013099	3.84		sen+	Os03g0790500
Zm00001d013118	-8.07		sen-	Os03g0786400
Zm00001d013141	0.87		sen+	Os03g0780400
Zm00001d013146	-1.63		sen-	Os03g0778100
Zm00001d013151	3.22		sen+	Os03g0777000
Zm00001d013162	-3.18		sen-	Os03g0773700
Zm00001d013163	-1.22	0.62	sen-/tol+	Os03g0773000
Zm00001d013173	1.18		sen+	Os03g0769900
Zm00001d013182	-1.47		sen-	Os03g0767600
Zm00001d013191	-1.88		sen-	Os03g0765900
Zm00001d013201	0.86		sen+	Os03g0764800
Zm00001d013202	0.95	-1.42	sen+/tol-	Os03g0764600
Zm00001d013210	-1.08		sen-
Zm00001d013220	1.12		sen+	Os03g0761100
Zm00001d013221	-1.7		sen-	Os03g0761000
Zm00001d013230	-1.76	-0.86		Os03g0760300
Zm00001d013240	-1.47		sen-	Os03g0758900
Zm00001d013242	-1.11		sen-
Zm00001d013243	-0.72		sen-	Os03g0758300
Zm00001d013245	1.12		sen+	Os12g0443500
Zm00001d013256	-0.86		sen-	Os05g0386800
Zm00001d013261		1.92	tol+	Os06g0582600
Zm00001d013263	1.83		sen+	Os03g0751600
Zm00001d013267	-0.97		sen-	Os03g0749800
Zm00001d013271	0.78		sen+	Os03g0748900
Zm00001d013277	-3.14		sen-	Os03g0747700
Zm00001d013281		1.8	tol+	Os03g0746900
Zm00001d013287		0.49	tol+	Os03g0746700
Zm00001d013288	7.32		sen+	Os03g0745700
Zm00001d013294	1.34		sen+
Zm00001d013295	-2.25		sen-	Os05g0526200
Zm00001d013317	0.93		sen+	Os03g0737400
Zm00001d013319	-1.03		sen-	Os03g0736300
Zm00001d013320	-0.81		sen-	Os03g0736400
Zm00001d013324	-1.26		sen-	Os03g0736600
Zm00001d013326	0.92		sen+	Os03g0736900
Zm00001d013335	0.89		sen+	Os03g0733800
Zm00001d013348	-2.4		sen-	Os03g0729200
Zm00001d013364	-3.79		sen-	Os03g0726300
Zm00001d013367	-1.2		sen-	Os03g0726100
Zm00001d013376	1.4		sen+	Os03g0724300
Zm00001d013389	0.78		sen+	Os03g0722600
Zm00001d013398	-1.76		sen-	Os03g0721300
Zm00001d013402	1.86		sen+	Os03g0719800
Zm00001d013412	-1.82		sen-	Os03g0717700
Zm00001d013415	-0.93		sen-	Os03g0717000
Zm00001d013425	-3.17		sen-	Os03g0713200
Zm00001d013426	0.92		sen+	Os03g0713100
Zm00001d013428	-1.22		sen-	Os03g0712700
Zm00001d013443	-1.57		sen-	Os03g0711100
Zm00001d013445	1.48		sen+
Zm00001d013446	-1.61		sen-	Os03g0710600
Zm00001d013449	-1.12		sen-	Os03g0708900
Zm00001d013455	-0.99		sen-	Os03g0708500
Zm00001d013493	0.92		sen+	Os03g0700700
Zm00001d013507	-1.04		sen-	Os05g0303000
Zm00001d013509	-0.79		sen-	Os03g0694700
Zm00001d013524	-2.15		sen-	Os06g0712500
Zm00001d013529		0.85	tol+	Os03g0687000
Zm00001d013530	-2.11		sen-	Os03g0686900
Zm00001d013534	-1.09		sen-	Os03g0685000
Zm00001d013536		-2.49	tol-	Os03g0684700
Zm00001d013547	-1.44		sen-	Os03g0680800
Zm00001d013549		0.88	tol+	Os03g0678400
Zm00001d013551	-3.32		sen-	Os03g0676300
Zm00001d013573	-1.23		sen-	Os03g0669300
Zm00001d013596	-1.81		sen-	Os03g0665000
Zm00001d013598	-3.41		sen-	Os03g0664600
Zm00001d013610		-1.23	tol-	Os03g0663400
Zm00001d013614	-1.2		sen-
Zm00001d013627	0.81		sen+	Os03g0659400
Zm00001d013632	-1.46		sen-	Os03g0656900
Zm00001d013639	-1.15		sen-	Os03g0656201
Zm00001d013644	1.43		sen+
Zm00001d013655	-2.67		sen-	Os07g0689600
Zm00001d013656	-1.22		sen-	Os03g0651000
Zm00001d013678	-1.68		sen-
Zm00001d013689	4.05		sen+	Os03g0645900
Zm00001d013697	-1.72		sen-	Os03g0625900
Zm00001d013699	-1.54		sen-	Os03g0640800
Zm00001d013706	-1.8		sen-
Zm00001d013741	-1.25		sen-	Os03g0609800
Zm00001d013743	1.71	-1.2	sen+/tol-	Os03g0607700
Zm00001d013751	1.66		sen+	Os03g0599800
Zm00001d013755	0.71		sen+
Zm00001d013758	-0.76		sen-	Os05g0486700
Zm00001d013759	0.78		sen+	Os03g0594100
Zm00001d013781	-1.8	-0.95		Os03g0586500
Zm00001d013786	-1.61		sen-	Os03g0582000
Zm00001d013787	0.63		sen+
Zm00001d013795		0.69	tol+	Os03g0583800
Zm00001d013799	-2.75		sen-	Os03g0579000
Zm00001d013814	-3.16		sen-	Os03g0569800
Zm00001d013821	-1.43		sen-	Os03g0566600
Zm00001d013827	-0.86		sen-	Os07g0695900
Zm00001d013830	1.64		sen+	Os10g0167200
Zm00001d013836	0.86		sen+	Os10g0518800
Zm00001d013845	-1.34		sen-	Os02g0465900
Zm00001d013847	-1.48		sen-	Os10g0516600
Zm00001d013861	-1.2		sen-	Os10g0512500
Zm00001d013862	2.18		sen+	Os10g0512400
Zm00001d013887	-1.36		sen-	Os10g0509000
Zm00001d013907	2.06		sen+
Zm00001d013915		-1.22	tol-	Os10g0502400
Zm00001d013918	-1.1		sen-	Os10g0502000
Zm00001d013927	1.03		sen+	Os10g0500700
Zm00001d013937	-2.01	-0.7	ΔLFC>1	Os10g0496900
Zm00001d013940	-0.82		sen-	Os10g0495500
Zm00001d013956	1.92		sen+	Os10g0492600
Zm00001d013967	-2.07		sen-	Os10g0488800
Zm00001d014001	3.48		sen+	Os10g0481500
Zm00001d014026	-2.45		sen-	Os09g0110200
Zm00001d014035	-1.81		sen-	Os10g0477200
Zm00001d014055		0.58	tol+	Os10g0471100
Zm00001d014060	1.31		sen+	Os10g0470700
Zm00001d014079	-0.91		sen-	Os10g0466200
Zm00001d014081	1.94		sen+	Os10g0465950
Zm00001d014083	4.83		sen+	Os10g0465700
Zm00001d014091	-1		sen-	Os07g0170800
Zm00001d014116		-0.59	tol-	Os03g0150500
Zm00001d014121		-2.27	tol-	Os10g0439924
Zm00001d014134		-2.2	tol-	Os10g0439924
Zm00001d014157	0.85		sen+	Os10g0436800
Zm00001d014162	-1.69		sen-	Os10g0422566
Zm00001d014165		-1.64	tol-	Os10g0427300
Zm00001d014183	0.71		sen+	Os10g0413500
Zm00001d014189	-1.66		sen-
Zm00001d014191	1.66		sen+	Os10g0407500
Zm00001d014193		0.65	tol+	Os10g0406900
Zm00001d014200	1.11		sen+	Os10g0405300
Zm00001d014203	0.81		sen+
Zm00001d014204	-5.67		sen-
Zm00001d014241		0.9	tol+	Os10g0395100
Zm00001d014249	-2.06		sen-
Zm00001d014253	6.8		sen+	Os10g0391400
Zm00001d014258	2.16		sen+	Os10g0390500
Zm00001d014282	0.81		sen+	Os10g0169200
Zm00001d014284	-1.45		sen-	Os10g0181600
Zm00001d014291	0.76		sen+	Os10g0370000
Zm00001d014297	-1.18		sen-
Zm00001d014325	1.39		sen+	Os10g0177200
Zm00001d014328	1.5		sen+	Os10g0134700
Zm00001d014341		-0.74	tol-
Zm00001d014349	-0.95		sen-	Os07g0196200
Zm00001d014355	-0.76		sen-	Os02g0284600
Zm00001d014366	-2.31		sen-	Os06g0678800
Zm00001d014381	-2.3		sen-	Os06g0677600
Zm00001d014383	0.72		sen+	Os06g0677400
Zm00001d014405		-0.59	tol-	Os06g0675600
Zm00001d014435	0.93		sen+	Os10g0579200
Zm00001d014442	0.78		sen+	Os10g0455900
Zm00001d014444	-2.91		sen-	Os08g0299200
Zm00001d014451	-3.49		sen-
Zm00001d014456	-2.57	0.54	sen-/tol+
Zm00001d014458	-0.96		sen-
Zm00001d014463	3.04		sen+	Os06g0681200
Zm00001d014488	-2.37		sen-	Os06g0683200
Zm00001d014499	1.92		sen+	Os06g0685300
Zm00001d014530	1.08		sen+
Zm00001d014532	1.59		sen+	Os06g0687600
Zm00001d014559	-2.44		sen-
Zm00001d014564	-1.63		sen-	Os01g0501800
Zm00001d014580	-1.23		sen-
Zm00001d014587	1.14		sen+	Os06g0693700
Zm00001d014597	-1.95		sen-	Os06g0694400
Zm00001d014606	-1.34		sen-	Os06g0695400
Zm00001d014608	3.29		sen+	Os06g0695500
Zm00001d014609	1.65		sen+	Os06g0695600
Zm00001d014616	-4.77		sen-
Zm00001d014617	-4.12		sen-	Os06g0697000
Zm00001d014642	1.3		sen+	Os06g0698600
Zm00001d014648	-1.23		sen-	Os06g0698748
Zm00001d014649	1.61		sen+	Os06g0698812
Zm00001d014650	1.95		sen+	Os06g0698812
Zm00001d014659	-1.58		sen-	Os06g0699500
Zm00001d014663	1.37		sen+
Zm00001d014664	0.9		sen+	Os06g0699600
Zm00001d014666	1.27		sen+	Os06g0700100
Zm00001d014667	1.03		sen+	Os06g0700300
Zm00001d014682	1.31		sen+
Zm00001d014698	-1.47		sen-	Os06g0703500
Zm00001d014701	-1.27	0.54	sen-/tol+	Os06g0703900
Zm00001d014704	-3.3		sen-	Os06g0704200
Zm00001d014717	1.56		sen+	Os06g0705000
Zm00001d014744	-3.23		sen-	Os06g0710300
Zm00001d014745	-1.47		sen-	Os06g0710500
Zm00001d014748		-2.2	tol-	Os06g0710700
Zm00001d014751	-1.54		sen-	Os06g0710800
Zm00001d014757	1.61		sen+	Os06g0711800
Zm00001d014759		-0.64	tol-	Os05g0490000
Zm00001d014765	1.01		sen+	Os06g0713000
Zm00001d014772	0.66		sen+	Os06g0714100
Zm00001d014778	-0.78		sen-	Os06g0714700
Zm00001d014781	-1.01		sen-	Os06g0715200
Zm00001d014789	1.01		sen+	Os06g0716000
Zm00001d014792	1.04		sen+	Os06g0716700
Zm00001d014796	1.21		sen+	Os06g0717600
Zm00001d014806	4.47		sen+	Os06g0721900
Zm00001d014808	0.8		sen+	Os06g0724100
Zm00001d014817	2.26		sen+	Os06g0725100
Zm00001d014826	-2.3		sen-	Os06g0725300
Zm00001d014848	1.64		sen+	Os06g0727200
Zm00001d014850	-1.74		sen-	Os06g0727400
Zm00001d014863	-1.3	1.13	sen-/tol+	Os06g0728700
Zm00001d014865	-1.31	0.56	sen-/tol+	Os06g0728800
Zm00001d014866	-1.74		sen-	Os06g0728800
Zm00001d014875	-1.58		sen-	Os06g0729300
Zm00001d014898	1.12		sen+	Os06g0731800
Zm00001d014906	1.11		sen+	Os12g0562400
Zm00001d014919	-0.91		sen-	Os02g0101500
Zm00001d014944	1.77		sen+
Zm00001d014946	0.97		sen+	Os02g0105500
Zm00001d014949	-0.98		sen-	Os02g0106600
Zm00001d014953	1.47		sen+	Os09g0297000
Zm00001d014966		-0.75	tol-	Os02g0110400
Zm00001d014984	1.98		sen+	Os02g0114400
Zm00001d014988	-1.49		sen-	Os02g0114700
Zm00001d014990	-3.02		sen-
Zm00001d014993	1.2	-0.79	sen+/tol-	Os02g0115900
Zm00001d015004	-1.12		sen-	Os02g0117100
Zm00001d015025		-1.28	tol-	Os02g0119200
Zm00001d015030	-1.57		sen-	Os02g0120000
Zm00001d015031	-1.66		sen-	Os03g0138900
Zm00001d015032	1.24		sen+	Os02g0120100
Zm00001d015084	-2.72		sen-
Zm00001d015085	-2.1		sen-	Os02g0125000
Zm00001d015086	-0.97		sen-	Os10g0357800
Zm00001d015090	-2.08		sen-	Os02g0125200
Zm00001d015095	-1.73		sen-	Os02g0125700
Zm00001d015118	-0.87		sen-	Os02g0128200
Zm00001d015121	1.17		sen+	Os02g0128600
Zm00001d015126	-2.8	-1.44	ΔLFC>1	Os02g0129800
Zm00001d015127	-2.61		sen-
Zm00001d015130	0.82		sen+	Os02g0130300
Zm00001d015138		0.71	tol+
Zm00001d015153	-1.9		sen-	Os02g0132500
Zm00001d015182	2.09		sen+	Os02g0134000
Zm00001d015183		-0.79	tol-	Os02g0134400
Zm00001d015198	-1.78		sen-	Os02g0489500
Zm00001d015201	2.36	-2.47	sen+/tol-	Os02g0136000
Zm00001d015210	-1.18		sen-	Os02g0137600
Zm00001d015215	-1.76		sen-	Os02g0138100
Zm00001d015219	-3.05		sen-
Zm00001d015233	-1.62		sen-	Os02g0139400
Zm00001d015234		0.65	tol+	Os02g0139700
Zm00001d015249	0.98		sen+
Zm00001d015268	-4.2		sen-	Os02g0148000
Zm00001d015289	1.64		sen+	Os02g0150700
Zm00001d015293	0.92		sen+	Os02g0152500
Zm00001d015298		-1.35	tol-	Os02g0153400
Zm00001d015300	-0.82		sen-
Zm00001d015306		0.65	tol+	Os02g0158300
Zm00001d015319		0.63	tol+	Os02g0160200
Zm00001d015327	0.97		sen+	Os06g0681400
Zm00001d015347		-1.24	tol-
Zm00001d015348	-1.11		sen-	Os02g0167300
Zm00001d015354	-2.22		sen-	Os06g0671150
Zm00001d015356	1.84		sen+	Os02g0168100
Zm00001d015364	0.73		sen+	Os02g0168600
Zm00001d015366	-1.63		sen-	Os02g0168800
Zm00001d015374	-1.85		sen-	Os02g0169000
Zm00001d015375		-0.67	tol-	Os07g0613200
Zm00001d015377	-1.34		sen-	Os02g0170000
Zm00001d015385	-1.98		sen-	Os06g0320500
Zm00001d015420	-1.91		sen-	Os02g0174800
Zm00001d015430	1.49		sen+	Os02g0175700
Zm00001d015448	3.94		sen+
Zm00001d015470	-2.23	1.57	sen-/tol+
Zm00001d015484	-1.83		sen-	Os02g0179100
Zm00001d015490	-2.3		sen-	Os02g0179500
Zm00001d015496	-0.93		sen-
Zm00001d015504		-1.09	tol-	Os02g0180000
Zm00001d015505	-0.78		sen-	Os02g0180200
Zm00001d015509	-0.79		sen-	Os02g0180500
Zm00001d015519	-2.39		sen-	Os02g0326200
Zm00001d015569	-1.89		sen-	Os02g0184200
Zm00001d015575	2.11		sen+	Os02g0179800
Zm00001d015578	4.78		sen+	Os02g0184700
Zm00001d015579		0.75	tol+	Os02g0185200
Zm00001d015605	-1.32		sen-
Zm00001d015613	-0.93		sen-	Os02g0187600
Zm00001d015628	-1.51		sen-	Os02g0189000
Zm00001d015651	-1.5		sen-	Os02g0190600
Zm00001d015658	1.48		sen+	Os02g0191300
Zm00001d015662	-1.2		sen-	Os07g0475800
Zm00001d015700		-1.06	tol-	Os08g0300300
Zm00001d015702	-1	-1.09		Os08g0300300
Zm00001d015705	-1.47		sen-	Os02g0307800
Zm00001d015723	-1.32		sen-	Os02g0204400
Zm00001d015724	-1.52		sen-	Os02g0204400
Zm00001d015737		3.92	tol+	Os02g0203700
Zm00001d015743	-3.07	-1.04	ΔLFC>1	Os02g0203000
Zm00001d015767	1.74		sen+	Os02g0201300
Zm00001d015780	1.69		sen+	Os02g0200800
Zm00001d015785	0.96		sen+	Os02g0200000
Zm00001d015837	-0.94		sen-	Os02g0196300
Zm00001d015856	1.1		sen+	Os02g0194100
Zm00001d015889		-2.14	tol-	Os02g0450000
Zm00001d015890	0.65		sen+
Zm00001d015912	3.51		sen+	Os02g0301100
Zm00001d015918	-2.27	-1.02	ΔLFC>1
Zm00001d015929	-1.98		sen-	Os02g0285800
Zm00001d015940	-1.37		sen-	Os08g0112600
Zm00001d015985	-0.99		sen-	Os02g0276500
Zm00001d015992	0.79		sen+	Os02g0274100
Zm00001d015999	-3.74		sen-	Os02g0273800
Zm00001d016000	-1.65		sen-	Os02g0271900
Zm00001d016016	-0.9		sen-	Os02g0269200
Zm00001d016019	-2.88		sen-
Zm00001d016036	-2.01		sen-	Os02g0267000
Zm00001d016037	-1.82		sen-
Zm00001d016066	-2.56		sen-	Os02g0260200
Zm00001d016072	-1.4		sen-	Os02g0259600
Zm00001d016077	0.75		sen+	Os02g0658900
Zm00001d016100	-1.91		sen-	Os02g0257300
Zm00001d016105		0.79	tol+	Os02g0255500
Zm00001d016130	1.1		sen+	Os02g0250400
Zm00001d016134	-1.2		sen-	Os07g0556200
Zm00001d016144	-1.7		sen-	Os02g0320300
Zm00001d016145	-3.79		sen-
Zm00001d016155	-1.51		sen-	Os02g0247000
Zm00001d016166	1.76		sen+	Os02g0244700
Zm00001d016185	-2.89		sen-	Os02g0236600
Zm00001d016198		-0.7	tol-	Os02g0236000
Zm00001d016199	2		sen+	Os02g0235900
Zm00001d016200	-1.06		sen-
Zm00001d016228		-0.71	tol-	Os02g0234200
Zm00001d016237	2.99		sen+	Os02g0232900
Zm00001d016248	1.48		sen+	Os02g0232400
Zm00001d016255	4.1		sen+	Os02g0232000
Zm00001d016269		-1.86	tol-	Os02g0229900
Zm00001d016274		-2	tol-	Os02g0229400
Zm00001d016276		-0.63	tol-	Os02g0229000
Zm00001d016277	2.17		sen+	Os02g0228900
Zm00001d016299	1.28		sen+	Os02g0226300
Zm00001d016332	-0.83		sen-	Os02g0224100
Zm00001d016361	-3.45		sen-	Os02g0220400
Zm00001d016408	-3.48		sen-	Os02g0208500
Zm00001d016435	-1.34		sen-
Zm00001d016456	-1.76		sen-
Zm00001d016477	0.78		sen+
Zm00001d016483	1.41		sen+	Os02g0475300
Zm00001d016490	-1.04		sen-	Os02g0478500
Zm00001d016493	-1.7		sen-	Os02g0479300
Zm00001d016510	-1.97		sen-	Os02g0534700
Zm00001d016542	-1.98		sen-	Os02g0328300
Zm00001d016545	-1.72		sen-
Zm00001d016549	-1.06		sen-	Os02g0503400
Zm00001d016550	0.81		sen+	Os02g0503500
Zm00001d016558	2.82		sen+	Os05g0319900
Zm00001d016586	1.34		sen+	Os02g0515200
Zm00001d016587	-1.08		sen-	Os02g0515000
Zm00001d016599	-1.8		sen-	Os02g0516400
Zm00001d016616	3.58		sen+
Zm00001d016625	-3.74		sen-
Zm00001d016647	1.4		sen+	Os02g0523800
Zm00001d016659	1.14		sen+	Os02g0525900
Zm00001d016661	3.03		sen+	Os02g0121300
Zm00001d016664	2.69		sen+	Os02g0526400
Zm00001d016682	2.42		sen+	Os02g0528000
Zm00001d016690	-2.63		sen-	Os02g0529900
Zm00001d016691		-1.06	tol-
Zm00001d016695	-1.26		sen-	Os02g0531200
Zm00001d016696	2.18		sen+	Os02g0532300
Zm00001d016698	-2.03	0.76	sen-/tol+	Os02g0532800
Zm00001d016702	-0.95		sen-	Os02g0533000
Zm00001d016705		1.1	tol+	Os02g0533800
Zm00001d016708	2.08		sen+	Os02g0534400
Zm00001d016718	3.71		sen+	Os04g0418100
Zm00001d016721		-1.78	tol-	Os02g0541500
Zm00001d016736	-2.81		sen-	Os02g0537700
Zm00001d016740	3.73		sen+	Os02g0537100
Zm00001d016744	0.68		sen+	Os02g0536100
Zm00001d016745	-2.39		sen-	Os02g0535901
Zm00001d016756	-2.98		sen-
Zm00001d016768	0.96		sen+	Os02g0550600
Zm00001d016783	1.47		sen+	Os02g0551100
Zm00001d016792	1.27		sen+	Os02g0551700
Zm00001d016802	-1.45		sen-	Os02g0553200
Zm00001d016806	3.34		sen+	Os02g0556000
Zm00001d016817		1.05	tol+	Os02g0554800
Zm00001d016825	1		sen+	Os02g0556600
Zm00001d016832	1.6		sen+	Os02g0557100
Zm00001d016854	-0.71		sen-	Os05g0361200
Zm00001d016863	-1.75		sen-
Zm00001d016865	-0.99		sen-	Os02g0564300
Zm00001d016866	1.14		sen+	Os12g0507000
Zm00001d016873	-2.04		sen-	Os02g0564700
Zm00001d016877	-1.47		sen-	Os06g0134050
Zm00001d016891	1.11		sen+	Os02g0566800
Zm00001d016893	-1.74		sen-	Os02g0567100
Zm00001d016895	-1.38	-0.81		Os02g0567800
Zm00001d016897	-0.9		sen-	Os02g0567900
Zm00001d016898	-1.88		sen-	Os02g0568200
Zm00001d016909	2.01		sen+	Os02g0572600
Zm00001d016918	1.37		sen+	Os02g0573400
Zm00001d016921	2.15		sen+
Zm00001d016922	1.17		sen+	Os02g0574500
Zm00001d016926	-0.79		sen-	Os02g0575500
Zm00001d016928	1.59		sen+
Zm00001d016933		1.07	tol+	Os02g0575700
Zm00001d016935	-1.35		sen-	Os02g0576700
Zm00001d016942	1.49		sen+	Os02g0578300
Zm00001d016943	-3.3		sen-	Os02g0578400
Zm00001d016947		-1.75	tol-
Zm00001d016948		-2.76	tol-
Zm00001d016949	0.92		sen+	Os02g0578800
Zm00001d016950	1.3		sen+	Os02g0579000
Zm00001d016956	-2.34		sen-
Zm00001d016977	0.95		sen+	Os02g0580400
Zm00001d016988	-0.91		sen-
Zm00001d016995	-1.64		sen-
Zm00001d016996	-1.31		sen-	Os02g0581500
Zm00001d017021	2.91		sen+	Os12g0626500
Zm00001d017036		-2.02	tol-	Os02g0588500
Zm00001d017037	-2.82		sen-	Os02g0588600
Zm00001d017047	-1.16		sen-	Os02g0591700
Zm00001d017049	-1.71		sen-	Os02g0591800
Zm00001d017053	1.72		sen+	Os02g0592200
Zm00001d017060	1.37		sen+	Os02g0592400
Zm00001d017069	-2.5	0.7	sen-/tol+	Os02g0593500
Zm00001d017077		-1.98	tol-	Os10g0320100
Zm00001d017090		-0.75	tol-	Os02g0595400
Zm00001d017092	-1.71		sen-	Os02g0595700
Zm00001d017097	-1.04		sen-	Os02g0596000
Zm00001d017106		-0.83	tol-	Os02g0596900
Zm00001d017111	1.04		sen+
Zm00001d017118	-1.52		sen-	Os02g0600200
Zm00001d017119	0.87		sen+	Os02g0600400
Zm00001d017121	2.05	-1.18	sen+/tol-	Os02g0601300
Zm00001d017146	-2.05		sen-	Os02g0606700
Zm00001d017147	-1.09	0.92	sen-/tol+
Zm00001d017151	-1.11		sen-	Os02g0606000
Zm00001d017152	1.62		sen+	Os02g0605900
Zm00001d017166	0.94		sen+	Os02g0608400
Zm00001d017167	-1.05		sen-	Os02g0608500
Zm00001d017176	-1	1.43	sen-/tol+	Os02g0610500
Zm00001d017178		0.67	tol+	Os02g0610700
Zm00001d017179	-1.21		sen-	Os02g0610800
Zm00001d017186	1.47		sen+	Os02g0611800
Zm00001d017187	-0.7		sen-	Os02g0612000
Zm00001d017199	1.42		sen+	Os02g0612900
Zm00001d017204	2.95		sen+	Os02g0613900
Zm00001d017206	1.08		sen+	Os02g0614200
Zm00001d017209	-2.23		sen-	Os02g0614600
Zm00001d017215	-1.85		sen-	Os02g0617600
Zm00001d017240	1.6		sen+	Os02g0618100
Zm00001d017241		-0.94	tol-	Os02g0618200
Zm00001d017247	2.59	-1.32	sen+/tol-	Os02g0619600
Zm00001d017248	1.87		sen+	Os02g0620400
Zm00001d017252	0.71		sen+	Os02g0621500
Zm00001d017275		-0.9	tol-	Os02g0626400
Zm00001d017276		-0.79	tol-	Os02g0627100
Zm00001d017279		-1.64	tol-	Os02g0627100
Zm00001d017282	1.69		sen+	Os02g0628200
Zm00001d017287	1		sen+	Os02g0629000
Zm00001d017288	-2.4		sen-	Os02g0629200
Zm00001d017320		-0.6	tol-
Zm00001d017333	-0.84		sen-	Os02g0634700
Zm00001d017357	-2.19		sen-	Os02g0637200
Zm00001d017374		1.13	tol+	Os02g0639100
Zm00001d017383	2.22		sen+
Zm00001d017397	1.09		sen+	Os04g0537100
Zm00001d017412	-2.21		sen-
Zm00001d017418	-1.21		sen-	Os02g0646500
Zm00001d017419	1.9		sen+	Os02g0648100
Zm00001d017420	3.06		sen+	Os02g0648300
Zm00001d017422	4.42	2.53	ΔLFC<-1	Os02g0649300
Zm00001d017432	-1.65		sen-	Os02g0651000
Zm00001d017438	-1.81	-1.98
Zm00001d017441	-1.39		sen-	Os02g0652000
Zm00001d017448	-2.84		sen-	Os02g0652550
Zm00001d017449	-1.59		sen-	Os02g0652600
Zm00001d017459	1.31		sen+	Os02g0654100
Zm00001d017470	0.92		sen+	Os02g0655600
Zm00001d017472	1.01		sen+	Os02g0655700
Zm00001d017482	-1.29		sen-	Os02g0657700
Zm00001d017485	-5.29		sen-	Os02g0658100
Zm00001d017486		2.97	tol+	Os02g0658200
Zm00001d017502	1.1		sen+	Os02g0661100
Zm00001d017505	-0.98		sen-	Os03g0840500
Zm00001d017507	-1.69		sen-	Os03g0840500
Zm00001d017525	-0.98		sen-	Os02g0666300
Zm00001d017531	-6.66		sen-	Os02g0666700
Zm00001d017539	-2.37		sen-	Os02g0668000
Zm00001d017540	-2.72		sen-	Os02g0668100
Zm00001d017545		-3.56	tol-	Os02g0668500
Zm00001d017547	3.31		sen+	Os02g0669100
Zm00001d017551		1.02	tol+
Zm00001d017558	-1.18		sen-	Os02g0671200
Zm00001d017573	-1.4		sen-	Os02g0673500
Zm00001d017575	-0.88		sen-
Zm00001d017583	-3		sen-
Zm00001d017597		-2.77	tol-	Os02g0678200
Zm00001d017598		-3.12	tol-	Os02g0678300
Zm00001d017601	1.17		sen+	Os02g0678400
Zm00001d017613	1.4		sen+	Os02g0681700
Zm00001d017645	-2		sen-	Os02g0686100
Zm00001d017646		-1.15	tol-	Os02g0686700
Zm00001d017649	1		sen+	Os02g0687500
Zm00001d017653	2.06	0.7	ΔLFC<-1
Zm00001d017657	1.51		sen+	Os02g0689500
Zm00001d017666		1.27	tol+	Os02g0689900
Zm00001d017676	-1.29		sen-	Os02g0690800
Zm00001d017684	1.14		sen+	Os02g0693000
Zm00001d017700		-1.86	tol-	Os02g0696700
Zm00001d017706	-2.08		sen-	Os02g0697500
Zm00001d017709	-1.47		sen-	Os02g0697800
Zm00001d017711	-2.61		sen-	Os02g0698000
Zm00001d017717	0.89		sen+
Zm00001d017746		-0.8	tol-	Os02g0701600
Zm00001d017755	-1.13		sen-	Os02g0702600
Zm00001d017770	-2.93		sen-	Os02g0704900
Zm00001d017777	1.12		sen+	Os02g0705400
Zm00001d017782	-1.68		sen-	Os02g0706400
Zm00001d017790	-0.74		sen-	Os02g0708100
Zm00001d017799	4.21		sen+	Os02g0709000
Zm00001d017809	1.11		sen+	Os02g0710900
Zm00001d017812	-0.91		sen-
Zm00001d017813	-2.57		sen-	Os02g0711300
Zm00001d017814	-3.11		sen-	Os02g0711400
Zm00001d017817		1.02	tol+
Zm00001d017849	1.57		sen+	Os02g0717600
Zm00001d017850	-1.05		sen-
Zm00001d017852	4.13		sen+
Zm00001d017867	1.25		sen+	Os02g0720500
Zm00001d017876	1.21		sen+	Os02g0721800
Zm00001d017897	-1.65		sen-	Os02g0725600
Zm00001d017907	-1.04		sen-	Os02g0726600
Zm00001d017913	-2.08		sen-
Zm00001d017918		1.04	tol+
Zm00001d017930	-1.25		sen-	Os02g0730800
Zm00001d017937	-1.07		sen-	Os05g0361900
Zm00001d017955	-1.87		sen-	Os02g0734800
Zm00001d017960	-0.85		sen-	Os02g0735900
Zm00001d017966	1.58		sen+	Os02g0736400
Zm00001d017977	1.53		sen+	Os02g0738400
Zm00001d017982	-1.91		sen-	Os02g0739000
Zm00001d017984	1.52		sen+	Os02g0739400
Zm00001d017992	1.17		sen+	Os02g0740700
Zm00001d017998	1.53		sen+	Os02g0741700
Zm00001d018011	1.78		sen+	Os04g0615100
Zm00001d018030	-1.43		sen-	Os02g0744000
Zm00001d018034	-1.74		sen-	Os02g0744900
Zm00001d018037	-3.07		sen-	Os02g0745100
Zm00001d018045	-1.02		sen-	Os02g0747400
Zm00001d018046	1.08		sen+
Zm00001d018049	0.76		sen+	Os02g0747500
Zm00001d018065	-2.1		sen-
Zm00001d018066	-1.21		sen-	Os02g0749800
Zm00001d018069	-1.59		sen-
Zm00001d018076	2.19		sen+	Os02g0751300
Zm00001d018077	-2.17		sen-	Os02g0751600
Zm00001d018089	2.63		sen+	Os02g0753700
Zm00001d018090		-0.94	tol-	Os02g0753800
Zm00001d018097	-4.59		sen-
Zm00001d018099	-0.78		sen-	Os02g0754900
Zm00001d018103	1.09		sen+	Os02g0755400
Zm00001d018106	-3.81		sen-	Os02g0756600
Zm00001d018107	-1.33		sen-	Os02g0757100
Zm00001d018111	-0.82		sen-
Zm00001d018119	1.41		sen+
Zm00001d018122	0.96		sen+	Os02g0759400
Zm00001d018130	-1.73	0.53	sen-/tol+	Os02g0759900
Zm00001d018149	0.95		sen+	Os02g0762400
Zm00001d018150	-0.92	1.44	sen-/tol+	Os02g0762600
Zm00001d018157	-1.96		sen-	Os02g0764500
Zm00001d018161		-2.77	tol-	Os01g0357100
Zm00001d018178	0.89		sen+	Os02g0766700
Zm00001d018192	-1.1		sen-
Zm00001d018197	-1.36		sen-	Os02g0768600
Zm00001d018203	4.35		sen+	Os02g0770500
Zm00001d018204	1.74		sen+	Os02g0770600
Zm00001d018206		-2.33	tol-	Os02g0770800
Zm00001d018214	-4.67		sen-	Os02g0771700
Zm00001d018238		-0.86	tol-	Os02g0774100
Zm00001d018247	-2.16		sen-	Os02g0775600
Zm00001d018274	-1.23		sen-	Os02g0778200
Zm00001d018292	2.59		sen+	Os02g0781900
Zm00001d018305	0.9		sen+
Zm00001d018334	-1.08		sen-	Os02g0788500
Zm00001d018348	-1.71		sen-	Os04g0551700
Zm00001d018362	-3.72		sen-	Os02g0255700
Zm00001d018366	-1.41		sen-	Os02g0794400
Zm00001d018370	0.88		sen+	Os12g0434400
Zm00001d018383	-1.04		sen-	Os06g0181566
Zm00001d018386	-1.65		sen-	Os02g0797500
Zm00001d018393	1.62		sen+	Os09g0242800
Zm00001d018399	1.34		sen+	Os02g0799300
Zm00001d018400	2.35		sen+
Zm00001d018401	-0.76		sen-	Os02g0800000
Zm00001d018412	-0.72		sen-
Zm00001d018413	-1.14		sen-	Os02g0804500
Zm00001d018420	-1.15		sen-	Os02g0805800
Zm00001d018430	-1.61		sen-
Zm00001d018431	1.71		sen+
Zm00001d018432		-0.53	tol-	Os03g0183100
Zm00001d018435		1.78	tol+	Os02g0810900
Zm00001d018439	0.74		sen+	Os02g0810450
Zm00001d018447	0.81		sen+	Os02g0809100
Zm00001d018454	1.47		sen+	Os02g0813500
Zm00001d018464	-2.83		sen-	Os02g0814400
Zm00001d018466	-1.41		sen-	Os02g0815200
Zm00001d018467	-4.37		sen-	Os02g0815300
Zm00001d018470	-2.09	0.65	sen-/tol+	Os02g0815700
Zm00001d018487	1.77		sen+	Os02g0817700
Zm00001d018488	-0.97		sen-	Os02g0817900
Zm00001d018500	3.28		sen+	Os11g0416900
Zm00001d018501	1		sen+	Os02g0819700
Zm00001d018502	1.83		sen+	Os02g0819900
Zm00001d018517	-1.66		sen-	Os02g0826200
Zm00001d018529	0.81		sen+	Os02g0828200
Zm00001d018530	-3.02		sen-	Os02g0828566
Zm00001d018571	-0.96		sen-	Os02g0833600
Zm00001d018595	-0.71		sen-	Os07g0100300
Zm00001d018599	-1.59		sen-	Os07g0100900
Zm00001d018609	-1.92		sen-	Os07g0102200
Zm00001d018614	-0.8		sen-	Os07g0103100
Zm00001d018618	-3.78		sen-	Os07g0104100
Zm00001d018623	-3.55		sen-	Os07g0105600
Zm00001d018625	-1.53	-1.86		Os07g0106000
Zm00001d018627	1.63		sen+	Os07g0106200
Zm00001d018628	-2.71		sen-	Os08g0375400
Zm00001d018630	-2.47		sen-	Os07g0107100
Zm00001d018652	-1.89		sen-	Os07g0111700
Zm00001d018665	-2.32		sen-
Zm00001d018677	-1.19	0.96	sen-/tol+	Os07g0116600
Zm00001d018693	-1.35		sen-	Os03g0309800
Zm00001d018694	-1.1		sen-	Os06g0562600
Zm00001d018696		-1.65	tol-	Os07g0119400
Zm00001d018698		-1	tol-
Zm00001d018699	1.56	-1.1	sen+/tol-	Os07g0118300
Zm00001d018701	3.12		sen+	Os08g0334900
Zm00001d018704	2.15		sen+
Zm00001d018712	1.53		sen+	Os02g0455400
Zm00001d018716	3.89		sen+	Os08g0334900
Zm00001d018734	2.86		sen+
Zm00001d018738	2.18	-1.48	sen+/tol-
Zm00001d018749	-2.13		sen-	Os07g0133500
Zm00001d018756	-2.02		sen-	Os07g0134700
Zm00001d018779	-1.13		sen-	Os07g0141400
Zm00001d018781	-0.82	0.57	sen-/tol+	Os07g0142000
Zm00001d018787	-1.53		sen-	Os07g0143700
Zm00001d018796	-1.82		sen-	Os12g0480100
Zm00001d018797	-2.11		sen-	Os07g0148900
Zm00001d018809		-2.39	tol-	Os09g0367700
Zm00001d018811	5		sen+	Os07g0153000
Zm00001d018812	-1.31		sen-	Os07g0153300
Zm00001d018823	1.76		sen+
Zm00001d018825	1.57		sen+	Os07g0159700
Zm00001d018838	-1.46		sen-	Os04g0105700
Zm00001d018839		1.32	tol+	Os06g0204100
Zm00001d018844	4.18		sen+	Os07g0161700
Zm00001d018846	-3.5		sen-	Os07g0162100
Zm00001d018857	-1.71		sen-	Os07g0162900
Zm00001d018868	-0.8		sen-	Os07g0164800
Zm00001d018870	-1.04		sen-	Os07g0165000
Zm00001d018883	-2.48		sen-	Os07g0166700
Zm00001d018891	-1.83		sen-	Os07g0168000
Zm00001d018896	-1.03		sen-	Os07g0170300
Zm00001d018903	-1.31		sen-	Os05g0274900
Zm00001d018924	-2.37		sen-	Os01g0718700
Zm00001d018927	1.3		sen+	Os06g0301100
Zm00001d018930	6.12		sen+	Os07g0176200
Zm00001d018936	-1.46		sen-	Os07g0176900
Zm00001d018940		-2.09	tol-	Os07g0178800
Zm00001d018941	-2.03		sen-	Os07g0178600
Zm00001d018943	-2.04		sen-	Os07g0179000
Zm00001d018946	0.71		sen+	Os07g0179400
Zm00001d018957	-0.74		sen-	Os07g0180900
Zm00001d018962	-3.49	1.16	sen-/tol+	Os07g0181500
Zm00001d018966	2.39	-2.46	sen+/tol-	Os06g0356800
Zm00001d018967	-1.23		sen-	Os07g0182200
Zm00001d018981		-0.88	tol-	Os07g0184800
Zm00001d019034	1.32		sen+	Os07g0186000
Zm00001d019045	-1.01		sen-	Os03g0279200
Zm00001d019048	1.24		sen+	Os07g0187700
Zm00001d019052	-1.08		sen-
Zm00001d019054	1.32		sen+	Os07g0188800
Zm00001d019057	-3.32		sen-	Os08g0102800
Zm00001d019059	-0.92		sen-	Os07g0189700
Zm00001d019062	-1.72		sen-	Os07g0191200
Zm00001d019078	2.38		sen+	Os07g0192000
Zm00001d019093	0.72		sen+	Os07g0195100
Zm00001d019108	-0.8		sen-	Os07g0203300
Zm00001d019124	-0.9		sen-	Os07g0204900
Zm00001d019125	-3.83		sen-	Os07g0205500
Zm00001d019139	0.88		sen+	Os07g0206700
Zm00001d019142	1.18		sen+
Zm00001d019145	-3.14		sen-	Os07g0207100
Zm00001d019163	2.18		sen+	Os07g0209100
Zm00001d019177	-3.44		sen-	Os07g0212200
Zm00001d019180	-1.01		sen-
Zm00001d019184	-1.84		sen-
Zm00001d019200	-1.87		sen-	Os07g0224900
Zm00001d019218	-0.92		sen-	Os07g0229800
Zm00001d019226	-4.39	-1.36	ΔLFC>1	Os07g0232900
Zm00001d019251	-3.45		sen-
Zm00001d019256	1.87		sen+	Os07g0241700
Zm00001d019260	-4.15		sen-
Zm00001d019279	2.26		sen+	Os07g0245100
Zm00001d019280	1.35		sen+
Zm00001d019282	-0.89		sen-	Os07g0245200
Zm00001d019283	1.08		sen+	Os07g0246200
Zm00001d019306	2.09		sen+
Zm00001d019311	1.58	-0.79	sen+/tol-	Os07g0249700
Zm00001d019312	-3.85	-1.21	ΔLFC>1
Zm00001d019329	-1.96		sen-
Zm00001d019339	-2.63		sen-
Zm00001d019343	-1.01		sen-	Os07g0264800
Zm00001d019344	-0.88		sen-	Os07g0265100
Zm00001d019358	1.33		sen+	Os07g0274700
Zm00001d019399		-3	tol-	Os07g0290200
Zm00001d019411	3.29		sen+	Os07g0283125
Zm00001d019413	2.39	0.82	ΔLFC<-1	Os07g0283050
Zm00001d019422	1.93		sen+	Os07g0294800
Zm00001d019450	-3.75		sen-	Os09g0482660
Zm00001d019453		1.78	tol+
Zm00001d019454	-1.16		sen-	Os08g0526300
Zm00001d019473	-1.37		sen-	Os12g0567700
Zm00001d019479	-2.43		sen-	Os07g0412100
Zm00001d019505	1.34		sen+
Zm00001d019507	-1.49		sen-	Os07g0424400
Zm00001d019518	-1.89		sen-
Zm00001d019546	-2.78		sen-	Os07g0446000
Zm00001d019554	-5.82		sen-
Zm00001d019563	-0.78		sen-	Os07g0448800
Zm00001d019573	-0.7		sen-	Os01g0495900
Zm00001d019593	-2.04		sen-
Zm00001d019613	-2.43		sen-	Os07g0464200
Zm00001d019628	2.6		sen+
Zm00001d019629	1.74		sen+
Zm00001d019631	0.72		sen+	Os09g0563200
Zm00001d019648	-1.65		sen-	Os09g0565200
Zm00001d019672	-1.71		sen-
Zm00001d019696	2.72		sen+	Os09g0111100
Zm00001d019697	-1.7		sen-	Os07g0640000
Zm00001d019698	1.47		sen+	Os09g0110300
Zm00001d019703	-1.37		sen-	Os09g0109800
Zm00001d019721	0.98		sen+	Os09g0103100
Zm00001d019725	3.56		sen+	Os09g0572700
Zm00001d019726	2.92		sen+	Os09g0572700
Zm00001d019744	1.38		sen+	Os09g0571700
Zm00001d019750	1.06		sen+
Zm00001d019752	1.57		sen+
Zm00001d019898	-1.98		sen-	Os09g0279500
Zm00001d019899	-2.39		sen-	Os09g0279400
Zm00001d019925		1.64	tol+	Os09g0278000
Zm00001d019926	-3.04		sen-	Os09g0277800
Zm00001d019936	1.67		sen+	Os09g0272000
Zm00001d019956	-2.34		sen-	Os01g0510600
Zm00001d019960		1.47	tol+	Os01g0724400
Zm00001d019976	-1.31		sen-	Os06g0476200
Zm00001d019978	0.79		sen+	Os09g0286400
Zm00001d019980	-1.3		sen-	Os09g0287300
Zm00001d019985	-2.33		sen-
Zm00001d019987	-2.16		sen-	Os09g0293900
Zm00001d019988		-1.9	tol-	Os09g0294000
Zm00001d019990	-1.77		sen-	Os09g0296400
Zm00001d020002		0.6	tol+	Os09g0296800
Zm00001d020023	-1.35		sen-	Os09g0299400
Zm00001d020030	-2.49		sen-	Os09g0306650
Zm00001d020042		0.78	tol+	Os09g0309500
Zm00001d020064	-1.88		sen-	Os09g0316000
Zm00001d020074	-4.4		sen-
Zm00001d020100	6.7		sen+	Os09g0325700
Zm00001d020108	-0.74	-0.92		Os09g0327400
Zm00001d020147	-4.26	-2.22	ΔLFC>1	Os09g0338500
Zm00001d020170		0.77	tol+	Os09g0344800
[truncated: 3,680 more rows]
