# Supplementary material for: A Comparative Transcriptomic Meta-Analysis Revealed Conserved Key Genes and Regulatory Networks Involved in Drought Tolerance in Cereal Crops
Source: Int J Mol Sci. 2021 Dec 2;22(23):13062. doi: 10.3390/ijms222313062 (PMC8657901; doi:10.3390/ijms222313062)
Supplement: Supplementary file 1 [file ijms-22-13062-s001.zip › Supplementary_File_S3.xlsx]

## Sheet: Bd
geneID	TF class	logFC.sen	logFC.tol	Class
BRADI1g69209	AP2	-2.53045		sen-
BRADI2g26987	AP2	-1.15549		sen-
BRADI3g36820	AP2	-3.40353		sen-
BRADI3g59300	AP2	0.809032		sen+
BRADI4g30617	AP2	1.89273		sen+
BRADI5g24100	AP2	0.969982		sen+
BRADI1g34340	ARF		-0.509001	tol-
BRADI2g50120	ARF	-1.58019		sen-
BRADI5g10950	ARF	-1.14783		sen-
BRADI5g15904	ARF	2.81408		sen+
BRADI1g47400	ARR-B	-0.577104		sen-
BRADI3g06120	ARR-B	-0.987603		sen-
BRADI1g48690	B3	-1.19963		sen-
BRADI2g07986	B3	-1.98377		sen-
BRADI3g12910	B3	-0.512545		sen-
BRADI3g18810	B3	-0.832076		sen-
BRADI4g38630	BES1	1.42861		sen+
BRADI1g05430	bHLH	-0.823864		sen-
BRADI1g06670	bHLH	-2.14532		sen-
BRADI1g09177	bHLH	1.52493		sen+
BRADI1g10170	bHLH	-1.83798		sen-
BRADI1g12780	bHLH	-5.20163		sen-
BRADI1g13980	bHLH	-1.95303		sen-
BRADI1g25230	bHLH	0.976796		sen+
BRADI1g25470	bHLH	-0.774027		sen-
BRADI1g35990	bHLH	2.74687		sen+
BRADI1g46700	bHLH	1.45992		sen+
BRADI1g61110	bHLH	1.09639		sen+
BRADI2g00730	bHLH	3.65686		sen+
BRADI2g00740	bHLH	2.95176		sen+
BRADI2g20720	bHLH	-1.98422		sen-
BRADI2g36740	bHLH	2.51987		sen+
BRADI2g39970	bHLH	-3.92059		sen-
BRADI2g47730	bHLH	1.60518		sen+
BRADI2g60970	bHLH	-7.22683	-3.58937	ΔLFC>1
BRADI2g61050	bHLH	-2.33063	-3.42142	ΔLFC<-1
BRADI3g01540	bHLH	-0.781581		sen-
BRADI3g15440	bHLH	-0.929483		sen-
BRADI3g33170	bHLH	-1.75801		sen-
BRADI3g38970	bHLH	0.982328		sen+
BRADI3g39927	bHLH	-1.30566		sen-
BRADI3g40860	bHLH	-1.3234		sen-
BRADI3g43250	bHLH	-4.16306	-2.10949	ΔLFC>1
BRADI3g45360	bHLH	1.77993		sen+
BRADI3g46200	bHLH	2.82242		sen+
BRADI3g48070	bHLH	-3.49446		sen-
BRADI3g52790	bHLH	-2.02193		sen-
BRADI3g58360	bHLH	7.12013		sen+
BRADI4g14190	bHLH		1.74797	tol+
BRADI4g17460	bHLH	-2.57805		sen-
BRADI4g34350	bHLH	-0.955239		sen-
BRADI5g01900	bHLH	0.829697		sen+
BRADI5g22920	bHLH	0.900186		sen+
BRADI1g04510	bZIP	8.49115		sen+
BRADI1g05480	bZIP	-1.85173		sen-
BRADI1g07310	bZIP	3.70075		sen+
BRADI1g17210	bZIP	-0.537358		sen-
BRADI1g30140	bZIP	-0.97446		sen-
BRADI1g30750	bZIP	1.14405		sen+
BRADI1g31700	bZIP	-1.64327		sen-
BRADI1g43900	bZIP	-4.13604		sen-
BRADI1g46060	bZIP	1.21098		sen+
BRADI1g63840	bZIP	-1.87361		sen-
BRADI1g68560	bZIP	0.612674		sen+
BRADI2g15940	bZIP	1.26369		sen+
BRADI2g24120	bZIP	1.10863		sen+
BRADI2g25400	bZIP	0.557409		sen+
BRADI2g40582	bZIP	1.89083		sen+
BRADI2g45567	bZIP	3.8792		sen+
BRADI2g52590	bZIP	-2.08877		sen-
BRADI2g52860	bZIP	-0.846513		sen-
BRADI2g53060	bZIP	0.817081		sen+
BRADI2g55567	bZIP	-1.36195		sen-
BRADI2g56096	bZIP	2.11944		sen+
BRADI3g02730	bZIP	-2.34151		sen-
BRADI3g02980	bZIP	-1.81977		sen-
BRADI3g07540	bZIP	-1.14642		sen-
BRADI3g15590	bZIP	0.996045		sen+
BRADI3g38200	bZIP	0.938319		sen+
BRADI3g57960	bZIP	1.84079		sen+
BRADI4g02570	bZIP	-1.47532		sen-
BRADI4g04720	bZIP	1.44649		sen+
BRADI4g32920	bZIP	-1.65622		sen-
BRADI4g42120	bZIP	6.68917		sen+
BRADI1g14750	C2H2	-1.47179		sen-
BRADI1g23470	C2H2	-0.828402		sen-
BRADI1g68570	C2H2	-1.24569		sen-
BRADI1g71330	C2H2	1.67251		sen+
BRADI1g74997	C2H2	-0.831761		sen-
BRADI2g14120	C2H2	1.07168		sen+
BRADI2g41550	C2H2	1.8078		sen+
BRADI2g58261	C2H2	1.23232		sen+
BRADI2g58720	C2H2	1.46974		sen+
BRADI3g01483	C2H2	1.2057		sen+
BRADI1g11760	C3H	0.631838		sen+
BRADI2g05750	C3H	1.15217		sen+
BRADI2g33270	C3H	1.61596		sen+
BRADI2g54220	C3H	0.791245		sen+
BRADI2g58770	C3H	-1.76103		sen-
BRADI4g08050	C3H	-1.19622		sen-
BRADI4g19010	C3H	-1.41121		sen-
BRADI5g02300	C3H	0.632975		sen+
BRADI1g11310	CO-like	-1.2057		sen-
BRADI1g31280	CO-like	-2.49159		sen-
BRADI1g43990	CO-like	-4.36279		sen-
BRADI3g05800	CO-like	-1.6538		sen-
BRADI3g19010	CO-like	1.9385		sen+
BRADI3g48447	CO-like	-2.12368		sen-
BRADI3g56490	CO-like	1.83156		sen+
BRADI3g57000	CO-like	-1.87907		sen-
BRADI5g14600	CO-like	-1.59544		sen-
BRADI1g55710	CPP	3.67678		sen+
BRADI3g34670	CPP	1.36961		sen+
BRADI4g02410	CPP	0.60875		sen+
BRADI1g35030	DBB	1.80313		sen+
BRADI1g49260	DBB	-0.684855		sen-
BRADI2g06370	DBB	1.36936		sen+
BRADI3g48180	DBB	-0.945802		sen-
BRADI4g35950	DBB	-1.57926		sen-
BRADI4g40250	DBB	-1.219		sen-
BRADI5g14280	DBB	-1.30706		sen-
BRADI5g17080	DBB	-3.22132		sen-
BRADI1g03710	Dof	-1.43776		sen-
BRADI1g17410	Dof	-0.980883		sen-
BRADI1g26570	Dof	-0.57846		sen-
BRADI2g09720	Dof	-1.28807		sen-
BRADI3g25670	Dof	-1.18072		sen-
BRADI4g33000	Dof	1.70863		sen+
BRADI5g18640	Dof	-0.800169		sen-
BRADI3g39970	EIL	-0.558019		sen-
BRADI1g45470	ERF	0.908864		sen+
BRADI1g46690	ERF	1.07796		sen+
BRADI1g48320	ERF	1.89704		sen+
BRADI1g54450	ERF	6.46018		sen+
BRADI1g72449	ERF	-0.919746		sen-
BRADI1g72457	ERF	-3.05823		sen-
BRADI2g06180	ERF	3.75824		sen+
BRADI2g09434	ERF	-1.39195		sen-
BRADI2g29960	ERF	1.07463		sen+
BRADI2g31480	ERF	1.8458		sen+
BRADI2g52370	ERF	-0.882786		sen-
BRADI2g60331	ERF	-2.48694		sen-
BRADI2g60340	ERF	-3.12146		sen-
BRADI3g06562	ERF	0.802001		sen+
BRADI3g08790	ERF	5.01985		sen+
BRADI3g31600	ERF	2.56242		sen+
BRADI3g35560	ERF	1.04642		sen+
BRADI3g41543	ERF	4.65063		sen+
BRADI3g41547	ERF	1.12983		sen+
BRADI3g42627	ERF	-3.66764		sen-
BRADI3g50508	ERF	6.38801		sen+
BRADI4g27850	ERF	1.44838		sen+
BRADI4g29010	ERF	0.860714		sen+
BRADI5g08380	ERF	1.65064		sen+
BRADI5g17480	ERF	-2.13848		sen-
BRADI5g17640	ERF	2.37723		sen+
BRADI1g13310	FAR1	0.52971		sen+
BRADI1g19740	FAR1	-1.20711		sen-
BRADI1g20830	FAR1	-0.559194		sen-
BRADI1g26980	FAR1	-0.708289		sen-
BRADI1g67740	FAR1	-1.34601		sen-
BRADI3g10416	FAR1	-0.64801		sen-
BRADI3g16121	FAR1	-0.576315		sen-
BRADI3g45470	FAR1	-0.681495		sen-
BRADI4g00925	FAR1	1.0496		sen+
BRADI4g15566	FAR1	1.21961		sen+
BRADI4g40020	FAR1	-1.36473		sen-
BRADI1g32370	G2-like	-1.27796		sen-
BRADI1g34470	G2-like	-2.16123		sen-
BRADI1g43710	G2-like	-1.6953		sen-
BRADI1g58830	G2-like	1.22027		sen+
BRADI1g63530	G2-like	-0.67244		sen-
BRADI2g04810	G2-like	-1.05188		sen-
BRADI2g08287	G2-like	-0.87293		sen-
BRADI2g21880	G2-like	-0.762805		sen-
BRADI2g62067	G2-like	-1.36091		sen-
BRADI3g09160	G2-like	-0.847899		sen-
BRADI3g25597	G2-like	-0.897821		sen-
BRADI3g52320	G2-like	-2.32929		sen-
BRADI4g27607	G2-like	-0.952931		sen-
BRADI5g20520	G2-like	1.44451		sen+
BRADI1g03020	GATA	0.898036		sen+
BRADI1g12330	GATA	-0.707545		sen-
BRADI1g37480	GATA	-0.613277		sen-
BRADI2g12590	GATA	-1.18194		sen-
BRADI2g35057	GATA	-1.12476		sen-
BRADI2g62660	GATA	1.26163		sen+
BRADI3g03800	GATA	0.551598		sen+
BRADI3g08240	GATA	0.996328		sen+
BRADI3g54720	GATA	1.23115		sen+
BRADI5g17370	GATA	-1.03843		sen-
BRADI1g23060	GRAS	-2.29019		sen-
BRADI1g23350	GRAS	-1.23033		sen-
BRADI3g50930	GRAS	-0.756458		sen-
BRADI4g03867	GRAS	-0.597621		sen-
BRADI4g09196	GRAS	1.17069		sen+
BRADI4g44093	GRAS	-1.60696		sen-
BRADI5g19190	GRAS	1.08027		sen+
BRADI1g50597	GRF	0.669189		sen+
BRADI3g52547	GRF	-0.887247		sen-
BRADI5g20607	GRF	0.840764		sen+
BRADI4g03303	HB-other	0.927648		sen+
BRADI1g13910	HD-ZIP	0.661333		sen+
BRADI1g71280	HD-ZIP	6.10282		sen+
BRADI3g15327	HD-ZIP	-0.981942		sen-
BRADI3g21480	HD-ZIP	2.18061		sen+
BRADI3g35850	HD-ZIP	1.25263		sen+
BRADI3g38600	HD-ZIP	0.870294		sen+
BRADI3g46320	HD-ZIP	4.54134		sen+
BRADI3g50220	HD-ZIP	5.83991		sen+
BRADI4g29380	HD-ZIP	1.98738		sen+
BRADI4g35910	HD-ZIP	1.1753		sen+
BRADI5g17170	HD-ZIP	3.34183		sen+
BRADI1g38140	HSF	2.05022		sen+
BRADI1g74350	HSF	-0.696713		sen-
BRADI2g41530	HSF	3.57568		sen+
BRADI2g48990	HSF	0.807036		sen+
BRADI3g08870	HSF	3.0929		sen+
BRADI3g26920	HSF	0.972382	0.744018
BRADI3g42130	HSF	3.93596		sen+
BRADI4g32130	HSF	1.04625		sen+
BRADI4g35780	HSF	1.34626		sen+
BRADI1g14780	LBD	-1.93803		sen-
BRADI2g53690	LBD	1.35228		sen+
BRADI3g16400	LSD	-3.52391	0.736226	S-/T+
BRADI4g02040	LSD	-0.655606		sen-
BRADI1g72150	MIKC_MADS	0.461837		sen+
BRADI3g13570	MIKC_MADS	-1.51563		sen-
BRADI3g32090	MIKC_MADS	-0.715645		sen-
BRADI4g06867	MIKC_MADS	-2.54964		sen-
BRADI5g21700	MIKC_MADS	7.13226		sen+
BRADI2g59119	M-type_MADS	-0.540963		sen-
BRADI3g39177	M-type_MADS	-1.00872		sen-
BRADI3g41297	M-type_MADS	-0.78432		sen-
BRADI4g30081	M-type_MADS	-1.30031		sen-
BRADI1g20586	MYB	-1.1147		sen-
BRADI1g64687	MYB	3.57262		sen+
BRADI2g01960	MYB	7.88339		sen+
BRADI2g11080	MYB	1.4157		sen+
BRADI2g11676	MYB	-0.545002		sen-
BRADI2g17982	MYB	3.42776		sen+
BRADI2g23310	MYB	-1.01542		sen-
BRADI2g23341	MYB	-1.11372		sen-
BRADI2g24400	MYB	-1.17299		sen-
BRADI2g46770	MYB	0.967238		sen+
BRADI3g28830	MYB	4.14659		sen+
BRADI3g36740	MYB	4.37675		sen+
BRADI3g42350	MYB	-4.08133		sen-
BRADI3g48886	MYB	3.86407		sen+
BRADI3g56917	MYB	2.85811		sen+
BRADI4g03970	MYB	1.40927		sen+
BRADI4g04050	MYB	-1.87629		sen-
BRADI4g08220	MYB	0.911247		sen+
BRADI4g23967	MYB	0.888227		sen+
BRADI5g20130	MYB	3.55105		sen+
BRADI1g29680	MYB_related	-1.24807		sen-
BRADI1g41993	MYB_related	-4.59132		sen-
BRADI2g02810	MYB_related	1.05411		sen+
BRADI2g05590	MYB_related	1.01829		sen+
BRADI2g05760	MYB_related	1.38794		sen+
BRADI2g13860	MYB_related	-2.89506		sen-
BRADI2g16120	MYB_related	-4.35958		sen-
BRADI2g42870	MYB_related	-2.37576		sen-
BRADI2g44520	MYB_related	-3.6826		sen-
BRADI2g55217	MYB_related	-0.756127		sen-
BRADI3g14830	MYB_related	-1.5524		sen-
BRADI3g16515	MYB_related	-1.13527		sen-
BRADI3g33400	MYB_related	-0.732824		sen-
BRADI3g33440	MYB_related	-1.28467		sen-
BRADI3g51757	MYB_related	-1.52799		sen-
BRADI3g52807	MYB_related	-3.56804		sen-
BRADI5g07300	MYB_related	0.681971		sen+
BRADI5g19380	MYB_related	1.54556		sen+
BRADI1g04150	NAC	1.07821		sen+
BRADI1g14467	NAC	-2.0453		sen-
BRADI1g17440	NAC	1.6946		sen+
BRADI1g17480	NAC	2.69232	-1.51629	S+/T-
BRADI1g50057	NAC	1.74515		sen+
BRADI1g63600	NAC	3.61251		sen+
BRADI2g24987	NAC	3.72114		sen+
BRADI2g25150	NAC	-2.03951		sen-
BRADI2g28020	NAC	1.55002		sen+
BRADI2g33307	NAC	1.99007		sen+
BRADI2g53260	NAC	-3.18655		sen-
BRADI2g55780	NAC	-3.33896		sen-
BRADI2g57297	NAC	-0.954345		sen-
BRADI3g13630	NAC	-1.14923		sen-
BRADI3g13727	NAC	-1.55979		sen-
BRADI3g16480	NAC	0.645912		sen+
BRADI3g33957	NAC	2.53042		sen+
BRADI3g41470	NAC	-1.82729		sen-
BRADI3g54817	NAC	1.49972		sen+
BRADI4g02060	NAC	2.52002		sen+
BRADI4g03620	NAC	1.21272		sen+
BRADI4g23640	NAC	3.32144		sen+
BRADI4g34022	NAC	-0.833654		sen-
BRADI4g34800	NAC	-1.79192		sen-
BRADI4g40880	NAC	3.31708		sen+
BRADI4g44000	NAC	5.79379		sen+
BRADI5g15587	NAC	5.95694		sen+
BRADI1g13680	NF-YA	0.716793		sen+
BRADI1g21762	NF-YA	0.935807		sen+
BRADI1g72960	NF-YA	1.16204		sen+
BRADI1g21900	NF-YB	-2.24603		sen-
BRADI1g60030	NF-YB	-2.75449	0.641492	S-/T+
BRADI2g22940	NF-YB	1.12225		sen+
BRADI3g15670	NF-YB	-1.46438		sen-
BRADI1g67980	NF-YC	-3.16039		sen-
BRADI2g08177	Nin-like	-0.669651		sen-
BRADI2g08600	Nin-like	0.941017		sen+
BRADI4g37147	Nin-like	-1.0077		sen-
BRADI2g02720	RAV	-3.26755	-1.19921	ΔLFC>1
BRADI5g09140	S1Fa-like	0.777194		sen+
BRADI1g26720	SBP	-1.29994		sen-
BRADI2g59110	SBP	3.35911		sen+
BRADI4g34667	SBP	-1.00459		sen-
BRADI1g09615	TALE	-1.20707		sen-
BRADI1g30730	TALE	-1.53091		sen-
BRADI1g51980	TALE	-2.03847		sen-
BRADI1g74060	TALE	-0.784726		sen-
BRADI1g76970	TALE	1.23273		sen+
BRADI2g54940	TALE	1.53788		sen+
BRADI3g26690	TALE	1.57277		sen+
BRADI3g32040	TALE	-1.0109		sen-
BRADI4g00740	TALE	-0.636825		sen-
BRADI1g58450	TCP	-0.804288		sen-
BRADI2g06890	TCP	1.63358		sen+
BRADI2g50687	TCP	-0.868331		sen-
BRADI2g59240	TCP	-1.54764		sen-
BRADI3g59320	TCP	1.06078		sen+
BRADI4g41430	TCP	-2.75725		sen-
BRADI3g00697	Trihelix	1.9628		sen+
BRADI3g30457	Trihelix	1.4838		sen+
BRADI3g38682	Trihelix	-0.87871		sen-
BRADI3g44370	Trihelix	-2.32102		sen-
BRADI4g37730	Trihelix	0.556205		sen+
BRADI5g08600	Trihelix	-2.80299		sen-
BRADI5g17150	Trihelix	3.65372		sen+
BRADI3g04450	Whirly	1.14914		sen+
BRADI1g08106	WRKY	-1.80278		sen-
BRADI1g09170	WRKY	0.886119		sen+
BRADI1g13207	WRKY	-0.73841		sen-
BRADI1g22680	WRKY	-0.960653		sen-
BRADI1g59180	WRKY	-2.19474		sen-
BRADI1g63910	WRKY	3.05885		sen+
BRADI2g08620	WRKY	1.55999		sen+
BRADI2g15872	WRKY	-1.11325		sen-
BRADI2g44035	WRKY	-2.25437		sen-
BRADI2g45480	WRKY	-3.60857		sen-
BRADI2g54720	WRKY	3.93989		sen+
BRADI3g09810	WRKY	-1.27809		sen-
BRADI3g34567	WRKY	-3.36738		sen-
BRADI4g09886	WRKY	-0.625255		sen-
BRADI4g30360	WRKY	-3.35314		sen-
BRADI2g44540	ZF-HD	-2.57581		sen-
BRADI3g37040	ZF-HD	-1.88946		sen-
BRADI4g21160	ZF-HD	-2.85779		sen-
BRADI4g30240	ZF-HD	-2.05297		sen-
BRADI4g32580	ZF-HD	-5.02649		sen-
BRADI4g40270	ZF-HD	-2.08705		sen-
BRADI5g10470	ZF-HD	-1.36571		sen-

## Sheet: Hv
geneID	TF class	logFC.sen	logFC.tol	Class
HORVU1Hr1G056500	AP2		0.590879	tol+
HORVU6Hr1G020330	ARF		0.963813	tol+
HORVU3Hr1G097200	ARF		0.98	tol+
HORVU7Hr1G030000	ARR-B		1.2709	tol+
HORVU7Hr1G030050	ARR-B		0.681074	tol+
HORVU1Hr1G007010	B3		1.06253	tol+
HORVU3Hr1G105790	B3	-1.86898	-2.11983
HORVU4Hr1G014290	B3		-1.96866	tol-
HORVU5Hr1G122180	B3	-2.07859		sen-
HORVU6Hr1G054050	B3	-1.42149		sen-
HORVU1Hr1G071330	bHLH		-0.750309	tol-
HORVU3Hr1G000170	bHLH	5.02305		sen+
HORVU4Hr1G084850	bHLH		2.33616	tol+
HORVU5Hr1G093960	bHLH		-0.875696	tol-
HORVU2Hr1G095870	bHLH	-1.29		sen-
HORVU2Hr1G096810	bHLH	-2.17		sen-
HORVU5Hr1G073170	bHLH		-0.8	tol-
HORVU5Hr1G014170	bZIP	-3.48236	-1.95287	ΔLFC>1
HORVU5Hr1G054510	bZIP		-0.619652	tol-
HORVU7Hr1G093580	bZIP		-0.660343	tol-
HORVU5Hr1G106120	bZIP		-0.65	tol-
HORVU6Hr1G080870	C2H2		-2.57	tol-
HORVU5Hr1G103280	C3H		0.49	tol+
HORVU6Hr1G028150	DBB		-1.97281	tol-
HORVU2Hr1G092460	DBB		1.44	tol+
HORVU5Hr1G081190	DBB	-1.39	-1.35
HORVU5Hr1G073380	EIL		-0.57617	tol-
HORVU1Hr1G055710	ERF		-1.72081	tol-
HORVU5Hr1G080300	ERF	-1.86301		sen-
HORVU4Hr1G077310	ERF		1.79	tol+
HORVU6Hr1G062380	ERF	3.28		sen+
HORVU6Hr1G082880	ERF		-0.58	tol-
HORVU7Hr1G032750	ERF	0.72	1.14
HORVU7Hr1G107630	G2-like	2.32957		sen+
HORVU7Hr1G107670	G2-like	3.05019		sen+
HORVU5Hr1G018220	G2-like		1.07	tol+
HORVU5Hr1G097560	G2-like		1.29	tol+
HORVU2Hr1G043780	GRAS		-0.629492	tol-
HORVU3Hr1G086210	GRAS		-1.01097	tol-
HORVU2Hr1G021950	HB-other		0.989579	tol+
HORVU3Hr1G020400	HB-other		0.57	tol+
HORVU2Hr1G097940	HD-ZIP	2.17349		sen+
HORVU4Hr1G065900	HD-ZIP		-0.582006	tol-
HORVU4Hr1G070610	HD-ZIP		3.77557	tol+
HORVU5Hr1G067010	HD-ZIP		-1.13382	tol-
HORVU6Hr1G061390	HD-ZIP		1.8667	tol+
HORVU2Hr1G092710	HD-ZIP		0.73	tol+
HORVU5Hr1G059410	HD-ZIP	1.95	2.04
HORVU5Hr1G081090	HD-ZIP	0.78	0.9
HORVU1Hr1G081300	HSF		-3.04275	tol-
HORVU3Hr1G069590	HSF	1.22899		sen+
HORVU4Hr1G002480	LBD		-0.88	tol-
HORVU6Hr1G073040	MIKC_MADS		0.95	tol+
HORVU3Hr1G082210	MYB		-1.21143	tol-
HORVU4Hr1G018360	MYB		-1.80868	tol-
HORVU4Hr1G054420	MYB		-2.7126	tol-
HORVU1Hr1G089460	MYB_related	-2.75892	-2.88792
HORVU1Hr1G089490	MYB_related		-3.50699	tol-
HORVU1Hr1G089500	MYB_related		-3.18908	tol-
HORVU1Hr1G089570	MYB_related		-3.54612	tol-
HORVU1Hr1G091520	MYB_related	-2.40936	-1.23331	ΔLFC>1
HORVU1Hr1G091530	MYB_related	-0.883416	-1.04963
HORVU1Hr1G091540	MYB_related	-1.18196	-1.01842
HORVU3Hr1G052710	MYB_related		-1.88774	tol-
HORVU3Hr1G085180	MYB_related		-1.76329	tol-
HORVU7Hr1G070870	MYB_related	-1.67109	-1.24058
HORVU7Hr1G121210	MYB_related	-2.17907	-1.36617
HORVU3Hr1G021310	MYB_related		0.56	tol+
HORVU1Hr1G063740	NAC	3.03818		sen+
HORVU1Hr1G064300	NAC		-1.09456	tol-
HORVU3Hr1G036380	NAC		-0.582456	tol-
HORVU3Hr1G090440	NAC		-0.984356	tol-
HORVU4Hr1G017430	NAC		-1.59693	tol-
HORVU4Hr1G051360	NAC		1.09252	tol+
HORVU5Hr1G011650	NAC		1.60006	tol+
HORVU5Hr1G111590	NAC		-1.41464	tol-
HORVU7Hr1G076250	NAC		-0.937969	tol-
HORVU2Hr1G017370	NAC	5.12		sen+
HORVU2Hr1G039640	NAC		3.06	tol+
HORVU4Hr1G081430	NAC		-2.64	tol-
HORVU5Hr1G099390	NAC	5.64		sen+
HORVU6Hr1G019380	NAC		3.76	tol+
HORVU7Hr1G072670	NAC		2.41	tol+
HORVU2Hr1G032320	NF-YB		-0.653717	tol-
HORVU1Hr1G071620	NF-YB	1.19	0.85
HORVU1Hr1G082670	RAV		-3.17	tol-
HORVU2Hr1G048280	SBP		-1.20331	tol-
HORVU7Hr1G114650	TALE		-0.76	tol-
HORVU3Hr1G072670	TCP		-1.664	tol-
HORVU0Hr1G001430	WRKY		-2.372	tol-
HORVU2Hr1G034420	WRKY	-1.42432		sen-
HORVU2Hr1G065750	WRKY		-1.48185	tol-
HORVU3Hr1G059220	WRKY		-2.99181	tol-
HORVU3Hr1G088200	WRKY		-1.91048	tol-
HORVU4Hr1G002390	WRKY		-7.11768	tol-
HORVU5Hr1G056130	WRKY		-1.71214	tol-
HORVU5Hr1G065420	WRKY		-2.67279	tol-
HORVU6Hr1G028790	WRKY		-1.89513	tol-
HORVU7Hr1G113850	WRKY		-5.12918	tol-
HORVU0Hr1G030830	WRKY		-1.86	tol-
HORVU1Hr1G070250	WRKY		-3.22	tol-
HORVU2Hr1G017740	WRKY		-3.22	tol-
HORVU2Hr1G109330	WRKY		-3.61	tol-
HORVU3Hr1G050590	WRKY		-3.47	tol-
HORVU7Hr1G083270	WRKY		-2.62	tol-

## Sheet: Os
geneID	TF class	logFC.sen	logFC.tol	Class
Os05g0536250	AP2	1.38		sen+
Os05g0121600	AP2	-0.71		sen-
Os10g0479900	ARF		0.54	tol+
Os06g0685700	ARF		0.48	tol+
Os01g0670800	ARF	0.85		sen+
Os11g0523800	ARF	0.49	0.6
Os03g0120900	B3	-1.22	-1.42
Os11g0197600	B3	0.97		sen+
Os01g0105700	bHLH	1.74		sen+
Os01g0108400	bHLH	1.26		sen+
Os01g0159800	bHLH	2.16		sen+
Os03g0797600	bHLH	0.54		sen+
Os09g0474100	bHLH	0.88		sen+
Os01g0952800	bHLH	-1.31		sen-
Os03g0391700	bHLH		-0.76	tol-
Os02g0603600	bHLH		-1.64	tol-
Os08g0506700	bHLH	-0.52		sen-
Os03g0741100	bHLH	-1.23	-0.72
Os11g0601700	bHLH	0.49		sen+
Os03g0782500	bHLH		-0.42	tol-
Os01g0575200	bHLH	-2.38	-1.35	ΔLFC>1
Os01g0928000	bHLH	-0.82		sen-
Os03g0639300	bHLH	0.84	0.73
Os04g0631600	bHLH	1.07		sen+
Os04g0300600	bHLH	0.93	0.83
Os03g0306700	bZIP	-1.67		sen-
Os06g0211200	bZIP	1.04		sen+
Os01g0813100	bZIP		-0.68	tol-
Os08g0472000	bZIP		0.53	tol+
Os05g0129300	bZIP	-1.04	-0.66
Os06g0622700	bZIP	-0.84	-0.81
Os08g0357300	bZIP		-1.36	tol-
Os12g0194600	bZIP	-0.99		sen-
Os12g0601800	bZIP	-1.91	-1.04
Os09g0456200	bZIP	0.76	0.6
Os02g0128200	bZIP		-0.72	tol-
Os07g0686100	bZIP	-1.8	-1.64
Os02g0766700	bZIP	1.44	1.15
Os04g0637000	bZIP	0.51		sen+
Os07g0644100	bZIP	0.92		sen+
Os06g0601500	bZIP	0.96	0.92
Os02g0132500	bZIP	-0.77		sen-
Os09g0306400	bZIP	-0.73	-0.58
Os01g0174000	bZIP	0.5		sen+
Os01g0867300	bZIP	0.95		sen+
Os11g0152700	bZIP	1.6		sen+
Os06g0662200	bZIP	-2.37	-1.73
Os05g0411300	bZIP	0.6		sen+
Os02g0572900	C2H2	-0.63		sen-
Os07g0569700	C2H2	-0.83	-0.88
Os09g0431900	C2H2	0.87	1.14
Os03g0764100	C2H2	-1.4	-1.26
Os02g0823900	C2H2	1.04	1.18
Os05g0195200	C3H	1.19		sen+
Os05g0128200	C3H	1.19		sen+
Os07g0568300	C3H	-0.54		sen-
Os01g0192000	C3H	0.73	1.21
Os08g0536300	CO-like		-0.77	tol-
Os03g0711100	CO-like	0.94		sen+
Os04g0497700	CO-like	0.57		sen+
Os02g0610500	CO-like	0.69		sen+
Os06g0298200	CO-like	-1.32		sen-
Os06g0654900	CO-like	0.55		sen+
Os01g0202500	DBB	-1.28	-1.07
Os06g0713000	DBB	0.88	0.95
Os04g0540200	DBB	-1.57	-2.17
Os05g0204600	DBB	0.72		sen+
Os02g0606200	DBB	0.74		sen+
Os01g0277500	Dof		-1	tol-
Os02g0726300	Dof	-0.65	-0.61
Os03g0169600	Dof	-0.64		sen-
Os01g0673700	Dof	-0.88	-0.93
Os07g0508700	Dof	1.24		sen+
Os01g0797600	ERF	1.18	0.73
Os02g0654700	ERF	-2.15	-2.34
Os02g0782700	ERF	-0.51	-0.45
Os06g0166400	ERF	1.1		sen+
Os03g0815800	ERF	0.81		sen+
Os05g0497300	ERF		-0.8	tol-
Os08g0408500	ERF	0.61		sen+
Os08g0537900	ERF		-0.92	tol-
Os03g0182800	ERF	-1.8		sen-
Os02g0655200	ERF	2.43	1.28	ΔLFC<-1
Os04g0546800	ERF	-0.97	-2.2	ΔLFC<-1
Os09g0434500	ERF		-0.64	tol-
Os07g0617000	ERF	-1.47	-1.36
Os01g0868000	ERF	-1.66	-1.35
Os05g0497200	ERF	1.49		sen+
Os09g0286600	ERF		-0.61	tol-
Os09g0287000	ERF	-1.27	-1.47
Os04g0610400	ERF		-1.14	tol-
Os05g0572000	ERF	0.85		sen+
Os04g0669200	ERF	0.78		sen+
Os03g0718200	FAR1	0.89		sen+
Os11g0151002	FAR1		-1.07	tol-
Os01g0239000	G2-like	0.48		sen+
Os03g0764600	G2-like	0.81		sen+
Os10g0463400	G2-like		-0.96	tol-
Os07g0119300	G2-like	0.88		sen+
Os06g0670300	G2-like	-1.35	-1.42
Os12g0105600	G2-like	-1.23		sen-
Os03g0654600	G2-like	0.59		sen+
Os05g0488600	G2-like	-0.85	-0.64
Os05g0155400	GATA		-1	tol-
Os06g0571800	GATA	0.73		sen+
Os10g0369600	GRAS	0.64	0.71
Os01g0948200	GRAS	0.66		sen+
Os03g0193000	GRAS	-0.46		sen-
Os11g0705200	GRAS	-1.46	-1.55
Os02g0662700	GRAS		-0.82	tol-
Os07g0583600	GRAS	-0.77		sen-
Os01g0881500	GRAS	-0.61		sen-
Os12g0573200	GRAS		-0.59	tol-
Os05g0320300	HB-other		0.8	tol+
Os03g0769800	HB-other		-1.12	tol-
Os09g0379600	HD-ZIP	0.52		sen+
Os10g0103700	HD-ZIP	-0.61		sen-
Os10g0561800	HD-ZIP	-0.97	-1.03
Os04g0548700	HD-ZIP	0.86		sen+
Os04g0541700	HD-ZIP	2.18	1.8
Os04g0569100	HD-ZIP		1.09	tol+
Os10g0480200	HD-ZIP	0.94		sen+
Os03g0161900	HSF	0.73		sen+
Os08g0546800	HSF	2.24		sen+
Os07g0178600	HSF	1.23	0.97
Os05g0530400	HSF	-1.34	-0.63
Os09g0526600	HSF	1.57		sen+
Os10g0419300	HSF	1.03		sen+
Os03g0609500	LBD	1.6		sen+
Os08g0159500	LSD	-0.75	-0.7
Os03g0639600	LSD		-0.63	tol-
Os06g0108500	MIKC_MADS		-1.6	tol-
Os10g0536100	MIKC_MADS	-0.55	-0.46
Os02g0731200	MIKC_MADS		0.49	tol+
Os06g0712700	MIKC_MADS	0.92	0.67
Os07g0432800	MYB	-0.91		sen-
Os05g0114700	MYB	0.48		sen+
Os06g0258000	MYB	2.47	1.95
Os08g0428200	MYB	-1.66		sen-
Os01g0305900	MYB	0.88		sen+
Os01g0874300	MYB	0.99		sen+
Os03g0720800	MYB		-1.11	tol-
Os05g0459000	MYB	-1		sen-
Os12g0567300	MYB		0.54	tol+
Os05g0553400	MYB	-1.38		sen-
Os01g0863300	MYB	1.14		sen+
Os05g0195700	MYB_related	0.79	0.69
Os09g0491644	MYB_related	0.56		sen+
Os01g0975300	MYB_related	-0.81	-1.23
Os08g0144000	MYB_related	0.99	1.62
Os08g0157600	MYB_related	1.89	2.43
Os01g0619900	MYB_related	-0.73	-0.56
Os02g0706400	MYB_related	-0.57		sen-
Os07g0484700	MYB_related	-0.51		sen-
Os02g0680700	MYB_related		0.51	tol+
Os05g0579600	MYB_related	-1.12	-0.81
Os01g0192300	MYB_related	0.74	1.26
Os01g0663051	MYB_related		-1.53	tol-
Os06g0728700	MYB_related	1.37	1.05
Os05g0567600	MYB_related		-1.23	tol-
Os07g0684800	NAC	0.55		sen+
Os01g0261200	NAC	-0.61		sen-
Os09g0493700	NAC	-0.65		sen-
Os03g0777000	NAC	-1.2		sen-
Os06g0101800	NAC	0.52		sen+
Os08g0436700	NAC	1.2		sen+
Os03g0815100	NAC		-1.11	tol-
Os03g0327800	NAC		0.68	tol+
Os12g0610600	NAC		1.05	tol+
Os05g0426200	NAC	-1.17	-0.62
Os12g0123700	NAC	1.29	2.16
Os06g0131700	NAC		1.53	tol+
Os02g0285900	NAC	0.77	0.9
Os03g0327100	NAC	-0.85		sen-
Os06g0726300	NAC	-2.58	-1.31	ΔLFC>1
Os03g0133000	NAC	-2.42	-0.96	ΔLFC>1
Os01g0884300	NAC		-0.45	tol-
Os04g0460600	NAC	1.62		sen+
Os01g0158900	NF-X1	-1.2	-0.86
Os03g0696300	NF-YA	0.43	0.55
Os03g0174900	NF-YA	0.59		sen+
Os03g0647600	NF-YA		0.81	tol+
Os08g0196700	NF-YA	0.62		sen+
Os03g0413000	NF-YB		-0.85	tol-
Os03g0251350	NF-YC	-0.97	-1.45
Os01g0102400	NF-YC	1.59	1.26
Os01g0693400	RAV	-1.22	-0.67
Os05g0549800	RAV	-1.04		sen-
Os04g0408700	S1Fa-like	-0.88		sen-
Os01g0292900	SBP	-0.63		sen-
Os04g0656500	SBP	-0.96		sen-
Os06g0646600	TALE	-0.45	-0.39
Os01g0763200	TCP	-0.94		sen-
Os07g0152000	TCP	0.86		sen+
Os08g0544800	TCP	0.74		sen+
Os05g0513100	TCP	0.51		sen+
Os02g0539600	Trihelix		-0.44	tol-
Os02g0174300	Trihelix	0.67		sen+
Os10g0516500	Trihelix	1.12		sen+
Os06g0145800	Whirly		-0.83	tol-
Os01g0665500	WRKY	-1		sen-
Os03g0657400	WRKY		-1.86	tol-
Os05g0183100	WRKY	-1.14	-1.05
Os05g0474800	WRKY		-1.81	tol-
Os01g0584900	WRKY	-1.75	-0.75
Os09g0334500	WRKY	-1.47	-0.48
Os01g0289600	WRKY	-1.06		sen-
Os01g0665750	WRKY	-1.23		sen-
Os02g0181300	WRKY	-0.57	-1.02
Os08g0386200	WRKY	-2.25	-1.04	ΔLFC>1
Os01g0246700	WRKY	-1.26	-0.89
Os01g0826400	WRKY	-3.36	-1.67	ΔLFC>1
Os03g0741400	WRKY		0.51	tol+
Os05g0583000	WRKY	0.97	1.48
Os05g0322900	WRKY	0.46	0.59
Os06g0146250	WRKY	-0.91		sen-
Os12g0116700	WRKY	0.98		sen+
Os11g0117400	WRKY	0.99		sen+
Os06g0158100	WRKY	-2.32	-1.32
Os06g0649000	WRKY	-2.9	-2.16
Os07g0680400	WRKY	-0.93		sen-
Os12g0116400	WRKY		0.86	tol+
Os12g0116600	WRKY	1.14	1.05
Os01g0821600	WRKY	1.79	1.8
Os09g0417600	WRKY		1.72	tol+
Os09g0417800	WRKY		1.9	tol+
Os12g0507300	WRKY	-0.57		sen-
Os03g0335200	WRKY	-2.29	-1.34
Os05g0537100	WRKY	-0.7		sen-
Os04g0605100	WRKY	-0.56	-0.81
Os01g0656400	WRKY	-1.09	-0.9
Os05g0343400	WRKY	-1.2	-1.44
Os11g0490900	WRKY	-1.13		sen-
Os05g0579300	ZF-HD	1.02		sen+
Os09g0466400	ZF-HD	1.14		sen+
Os01g0635550	ZHD		-0.79	tol-

## Sheet: Zm
geneID	TF class	logFC.sen	logFC.tol	Class
Zm00001d010987	AP2		-0.9	tol-
Zm00001d034629	AP2		0.66	tol+
Zm00001d046621	AP2	-5.11		sen-
Zm00001d001879	ARF	-1.59		sen-
Zm00001d003601	ARF	-2.13		sen-
Zm00001d011953	ARF	-1.59		sen-
Zm00001d012731	ARF	-1.34		sen-
Zm00001d023659	ARF	-1.25		sen-
Zm00001d039006	ARF	-1.39		sen-
Zm00001d039267	ARF	1.61		sen+
Zm00001d043431	ARF	-3.04		sen-
Zm00001d049295	ARF	-1.54		sen-
Zm00001d051172	ARF	-1.4		sen-
Zm00001d004102	ARR-B	-2.99		sen-
Zm00001d012128	ARR-B	-2.26		sen-
Zm00001d042463	ARR-B	-3.12		sen-
Zm00001d004358	B3	-1.35		sen-
Zm00001d007172	B3	1.89		sen+
Zm00001d034965	B3	-0.97		sen-
Zm00001d038504	B3	-1.39		sen-
Zm00001d006065	bHLH	-3.53		sen-
Zm00001d008205	bHLH	-1.32		sen-
Zm00001d012067	bHLH	-1		sen-
Zm00001d013073	bHLH	-2.17		sen-
Zm00001d016873	bHLH	-2.04		sen-
Zm00001d018119	bHLH	1.41		sen+
Zm00001d018967	bHLH	-1.23		sen-
Zm00001d024783	bHLH	-1.61		sen-
Zm00001d028664	bHLH	4.86		sen+
Zm00001d034298	bHLH	-1.68		sen-
Zm00001d037098	bHLH	-0.87		sen-
Zm00001d040148	bHLH	1.24		sen+
Zm00001d042263	bHLH	1.5		sen+
Zm00001d042482	bHLH		0.64	tol+
Zm00001d044242	bHLH	-1.33		sen-
Zm00001d047017	bHLH	2.31		sen+
Zm00001d048309	bHLH		-2.24	tol-
Zm00001d051569	bHLH		1.3	tol+
Zm00001d052038	bHLH	-2.45	0.8	sen-/tol+
Zm00001d003180	bZIP	1.47		sen+
Zm00001d005578	bZIP		-1.13	tol-
Zm00001d007042	bZIP	0.98		sen+
Zm00001d012294	bZIP		-2.08	tol-
Zm00001d012296	bZIP	5.47		sen+
Zm00001d012719	bZIP	-3.07		sen-
Zm00001d015118	bZIP	-0.87		sen-
Zm00001d015153	bZIP	-1.9		sen-
Zm00001d015743	bZIP	-3.07	-1.04	ΔLFC>1
Zm00001d018178	bZIP	0.89		sen+
Zm00001d018571	bZIP	-0.96		sen-
Zm00001d022442	bZIP	-2.07		sen-
Zm00001d028936	bZIP	0.77		sen+
Zm00001d030995	bZIP	-2.33		sen-
Zm00001d031697	bZIP	-1.95		sen-
Zm00001d031723	bZIP	1.21		sen+
Zm00001d038189	bZIP	-0.87		sen-
Zm00001d038296	bZIP	-2.52		sen-
Zm00001d039065	bZIP	0.93		sen+
Zm00001d040500	bZIP	1.02		sen+
Zm00001d041604	bZIP	1.44	0.85
Zm00001d042721	bZIP	0.9		sen+
Zm00001d042777	bZIP		-0.78	tol-
Zm00001d043117	bZIP		0.58	tol+
Zm00001d043992	bZIP	1.17		sen+
Zm00001d046402	bZIP	-2.22		sen-
Zm00001d046718	bZIP		-0.53	tol-
Zm00001d046937	bZIP		0.86	tol+
Zm00001d053703	bZIP	1.69		sen+
Zm00001d053967	bZIP		0.75	tol+
Zm00001d053988	bZIP	-2.33		sen-
Zm00001d005837	C2H2	-4.43		sen-
Zm00001d006682	C2H2	1.17		sen+
Zm00001d010842	C2H2	-1.04		sen-
Zm00001d012427	C2H2	4.72		sen+
Zm00001d012968	C2H2	3.86		sen+
Zm00001d021403	C2H2	-1.15		sen-
Zm00001d023557	C2H2	0.91		sen+
Zm00001d023788	C2H2	-0.97		sen-
Zm00001d028139	C2H2	0.91		sen+
Zm00001d028371	C2H2	-1.95		sen-
Zm00001d030858	C2H2	3.86		sen+
Zm00001d032922	C2H2	-1.83		sen-
Zm00001d034145	C2H2	1.85		sen+
Zm00001d035609	C2H2	4.2		sen+
Zm00001d035701	C2H2	0.82		sen+
Zm00001d036297	C2H2	-1.48		sen-
Zm00001d038297	C2H2	2.26	-1.16	sen+/tol-
Zm00001d042933	C2H2	6.86		sen+
Zm00001d044261	C2H2	-1.02		sen-
Zm00001d047330	C2H2	3.56		sen+
Zm00001d051865	C2H2	-1.04		sen-
Zm00001d003616	C3H	-0.98		sen-
Zm00001d021945	C3H	-4.53		sen-
Zm00001d023636	C3H	0.92		sen+
Zm00001d026536	C3H		0.76	tol+
Zm00001d042363	C3H	-1.01		sen-
Zm00001d053682	C3H	2.06		sen+
Zm00001d028007	CAMTA	2.25		sen+
Zm00001d003162	CO-like	-0.82	0.98	sen-/tol+
Zm00001d013443	CO-like	-1.57		sen-
Zm00001d024200	CO-like	1.64		sen+
Zm00001d025770	CO-like	-0.93		sen-
Zm00001d033719	CO-like	-3.72		sen-
Zm00001d037327	CO-like	-2.16		sen-
Zm00001d045661	CO-like	-4.94	-1.7	ΔLFC>1
Zm00001d045735	CO-like	1.1		sen+
Zm00001d046925	CO-like	-1.46		sen-
Zm00001d051684	CO-like		-0.59	tol-
Zm00001d018930	CPP	6.12		sen+
Zm00001d038660	CPP	0.82		sen+
Zm00001d014765	DBB	1.01		sen+
Zm00001d017147	DBB	-1.09	0.92	sen-/tol+
Zm00001d017176	DBB	-1	1.43	sen-/tol+
Zm00001d017412	DBB	-2.21		sen-
Zm00001d021278	DBB		0.78	tol+
Zm00001d051018	DBB	-1.01	0.95	sen-/tol+
Zm00001d017575	Dof	-0.88		sen-
Zm00001d028625	Dof	-1.07		sen-
Zm00001d032999	Dof	1.35		sen+
Zm00001d051439	Dof	-1.12		sen-
Zm00001d002364	ERF	1.88		sen+
Zm00001d002762	ERF	0.82		sen+
Zm00001d008545	ERF	-1.41		sen-
Zm00001d012585	ERF	-2.73		sen-
Zm00001d016616	ERF	3.58		sen+
Zm00001d018305	ERF	0.9		sen+
Zm00001d019744	ERF	1.38		sen+
Zm00001d020595	ERF		0.91	tol+
Zm00001d025281	ERF	1.69		sen+
Zm00001d026271	ERF	1.15		sen+
Zm00001d026486	ERF	-1.98		sen-
Zm00001d029884	ERF	-2.03		sen-
Zm00001d032295	ERF	1.11		sen+
Zm00001d034920	ERF		1.8	tol+
Zm00001d038320	ERF	2.67		sen+
Zm00001d039077	ERF		-1.02	tol-
Zm00001d039989	ERF	-1.85		sen-
Zm00001d043205	ERF	1.18		sen+
Zm00001d045204	ERF		1.47	tol+
Zm00001d049364	ERF	0.86		sen+
Zm00001d049889	ERF	8.5		sen+
Zm00001d051239	ERF	2.93		sen+
Zm00001d051451	ERF	-2.27		sen-
Zm00001d052229	ERF	-1.09		sen-
Zm00001d053195	ERF	1.63		sen+
Zm00001d049493	FAR1	-1.43		sen-
Zm00001d002649	G2-like	-2.29		sen-
Zm00001d013202	G2-like	0.95	-1.42	sen+/tol-
Zm00001d018698	G2-like		-1	tol-
Zm00001d023402	G2-like		-3.62	tol-
Zm00001d023411	G2-like		-3.28	tol-
Zm00001d026542	G2-like	-1.83	-1.66
Zm00001d030891	G2-like		0.99	tol+
Zm00001d034160	G2-like	0.74	-1.01	sen+/tol-
Zm00001d038191	G2-like	-0.95		sen-
Zm00001d039260	G2-like		0.68	tol+
Zm00001d044785	G2-like	-1.73		sen-
Zm00001d046981	G2-like	3.33		sen+
Zm00001d050404	G2-like	-1.42	0.7	sen-/tol+
Zm00001d009193	GATA	-0.97		sen-
Zm00001d011771	GATA	-1.82		sen-
Zm00001d012757	GATA	4.11		sen+
Zm00001d016361	GATA	-3.45		sen-
Zm00001d046354	GATA	-1.22		sen-
Zm00001d040254	GeBP	-1.58		sen-
Zm00001d003553	GRAS	-2.08		sen-
Zm00001d006701	GRAS		-0.77	tol-
Zm00001d021946	GRAS	-1.65		sen-
Zm00001d026158	GRAS	-0.72		sen-
Zm00001d027292	GRAS	-1.31		sen-
Zm00001d029607	GRAS	-3.82		sen-
Zm00001d030500	GRAS	-0.76		sen-
Zm00001d033834	GRAS	-2.25		sen-
Zm00001d038225	GRAS	1.15		sen+
Zm00001d048588	GRAS	2.77		sen+
Zm00001d051461	GRAS	0.94		sen+
Zm00001d026240	GRF	-1.94		sen-
Zm00001d029736	HB-other	-2.49		sen-
Zm00001d033246	HB-other		0.73	tol+
Zm00001d002799	HD-ZIP	4.8		sen+
Zm00001d005692	HD-ZIP		-1.46	tol-
Zm00001d005951	HD-ZIP	-4.32		sen-
Zm00001d017422	HD-ZIP	4.42	2.53	ΔLFC<-1
Zm00001d020804	HD-ZIP	-1.63		sen-
Zm00001d021236	HD-ZIP	-1.07		sen-
Zm00001d025964	HD-ZIP	1.38		sen+
Zm00001d027852	HD-ZIP	-2.02		sen-
Zm00001d027991	HD-ZIP	-1.36		sen-
Zm00001d028129	HD-ZIP		2.48	tol+
Zm00001d040090	HD-ZIP	-1.09		sen-
Zm00001d041489	HD-ZIP	-3.23		sen-
Zm00001d047995	HD-ZIP	1.14		sen+
Zm00001d051749	HD-ZIP	-1.05		sen-
Zm00001d005888	HSF	1.66		sen+
Zm00001d016255	HSF	4.1		sen+
Zm00001d018941	HSF	-2.03		sen-
Zm00001d020714	HSF	1.42		sen+
Zm00001d027757	HSF	-2.42		sen-
Zm00001d052738	HSF	1.36		sen+
Zm00001d028721	LBD	2.84		sen+
Zm00001d047752	LBD	3.97		sen+
Zm00001d035195	LSD	-1.49		sen-
Zm00001d049525	LSD	-1.32		sen-
Zm00001d007891	M-type_MADS	1.7		sen+
Zm00001d039913	M-type_MADS	-1.07		sen-
Zm00001d042315	M-type_MADS	-1.95		sen-
Zm00001d002476	MYB	2.9		sen+
Zm00001d003064	MYB	1.84		sen+
Zm00001d008602	MYB	-0.73		sen-
Zm00001d010201	MYB	2.79		sen+
Zm00001d012255	MYB	2.38		sen+
Zm00001d012337	MYB	-1.74		sen-
Zm00001d016000	MYB	-1.65		sen-
Zm00001d017383	MYB	2.22		sen+
Zm00001d018097	MYB	-4.59		sen-
Zm00001d020569	MYB	-2.18		sen-
Zm00001d021761	MYB	2.1		sen+
Zm00001d028930	MYB	1.83		sen+
Zm00001d030644	MYB	1.86		sen+
Zm00001d030678	MYB	-1.17		sen-
Zm00001d032024	MYB	-1.54		sen-
Zm00001d035604	MYB	-3.25		sen-
Zm00001d037334	MYB	2.28		sen+
Zm00001d039893	MYB	1.38		sen+
Zm00001d040527	MYB	-2.32		sen-
Zm00001d040621	MYB	1.38	-1.03	sen+/tol-
Zm00001d041580	MYB	4.25		sen+
Zm00001d042830	MYB	-1.78		sen-
Zm00001d047579	MYB	1.55		sen+
Zm00001d047671	MYB		-3.16	tol-
Zm00001d048623	MYB	-3.57	1.47	sen-/tol+
Zm00001d048647	MYB	1.98		sen+
Zm00001d053060	MYB		-1.9	tol-
Zm00001d008808	MYB_related		1.12	tol+
Zm00001d011297	MYB_related	-2.4	1.47	sen-/tol+
Zm00001d012285	MYB_related	2.74		sen+
Zm00001d014863	MYB_related	-1.3	1.13	sen-/tol+
Zm00001d017507	MYB_related	-1.69		sen-
Zm00001d017782	MYB_related	-1.68		sen-
Zm00001d024547	MYB_related		1.23	tol+
Zm00001d031454	MYB_related		-0.6	tol-
Zm00001d042756	MYB_related	2.82		sen+
Zm00001d044194	MYB_related		0.99	tol+
Zm00001d044409	MYB_related	-2		sen-
Zm00001d049581	MYB_related	0.89		sen+
Zm00001d051458	MYB_related	-0.92		sen-
Zm00001d051480	MYB_related	1.69		sen+
Zm00001d002285	NAC	3.51		sen+
Zm00001d002934	NAC	-1.52		sen-
Zm00001d003626	NAC	1.29		sen+
Zm00001d008399	NAC	1.96		sen+
Zm00001d011969	NAC	1.72		sen+
Zm00001d012527	NAC	1.37	-0.51	sen+/tol-
Zm00001d013003	NAC	4.07		sen+
Zm00001d013151	NAC	3.22		sen+
Zm00001d014405	NAC		-0.59	tol-
Zm00001d016950	NAC	1.3		sen+
Zm00001d018435	NAC		1.78	tol+
Zm00001d021069	NAC	1.23		sen+
Zm00001d022424	NAC	1.28		sen+
Zm00001d023294	NAC	1.55		sen+
Zm00001d023669	NAC	1.13		sen+
Zm00001d024268	NAC	-1.12	1.54	sen-/tol+
Zm00001d024543	NAC	0.97		sen+
Zm00001d025861	NAC	2.12		sen+
Zm00001d028995	NAC	1.5		sen+
Zm00001d028999	NAC	1.96		sen+
Zm00001d031655	NAC	-1.66		sen-
Zm00001d034277	NAC	2.02		sen+
Zm00001d034601	NAC	1.2		sen+
Zm00001d038207	NAC	0.92		sen+
Zm00001d038221	NAC	4.88		sen+
Zm00001d041472	NAC	1.13		sen+
Zm00001d042288	NAC	2.11		sen+
Zm00001d042609	NAC	1.35		sen+
Zm00001d045463	NAC		-4.89	tol-
Zm00001d047554	NAC	0.98		sen+
Zm00001d048044	NAC	3.73		sen+
Zm00001d050893	NAC	1.45		sen+
Zm00001d027874	NF-YA	-1.85		sen-
Zm00001d033602	NF-YA		0.75	tol+
Zm00001d022099	NF-YB	-1.1		sen-
Zm00001d007436	NF-YC	0.77		sen+
Zm00001d028432	NF-YC	-1.19		sen-
Zm00001d036648	NF-YC	0.94		sen+
Zm00001d052621	NF-YC	0.84		sen+
Zm00001d052838	NF-YC	-1.37		sen-
Zm00001d015201	Nin-like	2.36	-2.47	sen+/tol-
Zm00001d021442	Nin-like	-2.93		sen-
Zm00001d038907	RAV	1.37		sen+
Zm00001d043782	RAV		0.61	tol+
Zm00001d006028	SBP	-2.93		sen-
Zm00001d014698	SBP	-1.47		sen-
Zm00001d015233	SBP	-1.62		sen-
Zm00001d040571	SBP	-1.59		sen-
Zm00001d011843	SRS	2.45		sen+
Zm00001d013547	TALE	-1.44		sen-
Zm00001d033898	TALE	-1.47		sen-
Zm00001d035907	TALE	-2.32		sen-
Zm00001d046223	TALE	-3.51		sen-
Zm00001d012725	TCP	-1.68		sen-
Zm00001d018045	TCP	-1.02		sen-
Zm00001d018530	TCP	-3.02		sen-
Zm00001d025896	TCP	-2.16		sen-
Zm00001d037221	TCP	-0.9		sen-
Zm00001d038683	TCP	-2.86		sen-
Zm00001d039371	TCP	-1.5		sen-
Zm00001d044836	TCP	-1.27		sen-
Zm00001d051216	TCP	2.13		sen+
Zm00001d015605	Trihelix	-1.32		sen-
Zm00001d017420	Trihelix	3.06		sen+
Zm00001d038994	Trihelix	1.38		sen+
Zm00001d051316	Trihelix	2.27		sen+
Zm00001d054080	Trihelix	-2.24		sen-
Zm00001d036148	Whirly	-1.04		sen-
Zm00001d008612	WOX	-2.76		sen-
Zm00001d028986	WOX	2.38		sen+
Zm00001d043076	WOX	1.3		sen+
Zm00001d002405	WRKY	1.32		sen+
Zm00001d006001	WRKY	1.21	-0.65	sen+/tol-
Zm00001d007329	WRKY	1		sen+
Zm00001d008793	WRKY	1.73	1.5
Zm00001d008794	WRKY	3.77		sen+
Zm00001d009698	WRKY		-2.56	tol-
Zm00001d010399	WRKY	1.25		sen+
Zm00001d010617	WRKY	3.65		sen+
Zm00001d011413	WRKY	1.47		sen+
Zm00001d026252	WRKY	0.85		sen+
Zm00001d028962	WRKY	1.35		sen+
Zm00001d035323	WRKY	0.85		sen+
Zm00001d038023	WRKY	1.37		sen+
Zm00001d039245	WRKY	2		sen+
Zm00001d040554	WRKY		0.7	tol+
Zm00001d041740	WRKY	0.8		sen+
Zm00001d043950	WRKY	1.32		sen+
Zm00001d044162	WRKY	2.04	-2.86	sen+/tol-
Zm00001d046805	WRKY	1.26		sen+
Zm00001d047574	WRKY	-1.61	-0.72
Zm00001d049173	WRKY	1.5		sen+
Zm00001d050022	WRKY	-1.54		sen-
Zm00001d052357	WRKY	2.16		sen+
Zm00001d052847	WRKY	-0.73		sen-
Zm00001d053369	WRKY	1.58		sen+
Zm00001d041277	YABBY	1.11		sen+
Zm00001d032175	ZF-HD	-2.2		sen-
Zm00001d039116	ZF-HD	-2.29		sen-
Zm00001d041780	ZF-HD	-1.13		sen-
Zm00001d044662	ZF-HD	2.41		sen+
Zm00001d050443	ZF-HD	-3.06		sen-
