# Supplementary material for: A Comparative Transcriptomic Meta-Analysis Revealed Conserved Key Genes and Regulatory Networks Involved in Drought Tolerance in Cereal Crops
Source: Int J Mol Sci. 2021 Dec 2;22(23):13062. doi: 10.3390/ijms222313062 (PMC8657901; doi:10.3390/ijms222313062)
Supplement: Supplementary file 1 [file ijms-22-13062-s001.zip › Supplementary_File_S4.xlsx]

## Sheet: B. distachyon
Gene ID	TF class	score	Cluster
BRADI3g49260	Bd_10	0.997702	1
BRADI3g53100	Bd_11	0.967087	1
BRADI3g60160	Bd_13	0.999439	1
BRADI1g77580	Bd_15	0.926642	1
BRADI1g11670	Bd_21	0.936699	1
BRADI1g01750	Bd_24	0.991973	1
BRADI5g21930	Bd_32	0.981672	1
BRADI2g33450	Bd_33	0.927707	1
BRADI2g18640	Bd_39	0.850713	1
BRADI1g42270	Bd_41	0.981243	1
BRADI3g14800	Bd_48	0.991935	1
BRADI3g37140	Bd_50	0.992	1
BRADI4g27490	Bd_54	0.988682	1
BRADI4g31130	Bd_56	0.999558	1
BRADI4g36060	Bd_58	0.998542	1
BRADI3g28070	Bd_59	0.948859	1
BRADI2g49000	Bd_6	0.929228	1
BRADI4g19457	Bd_64	0.97354	1
BRADI4g44390	Bd_66	0.919317	1
BRADI2g56037	Bd_68	0.897916	1
BRADI2g52670	Bd_7	0.687523	1
BRADI3g43137	Bd_9	0.830546	1
BRADI3g59300	AP2	0.983677	1
BRADI5g24100	AP2	0.99898	1
BRADI1g34340	ARF	0.549091	1
BRADI5g15904	ARF	0.971778	1
BRADI4g38630	BES1	0.93986	1
BRADI1g46700	bHLH	0.871919	1
BRADI1g61110	bHLH	0.987355	1
BRADI2g00730	bHLH	0.962992	1
BRADI2g00740	bHLH	0.987222	1
BRADI2g36740	bHLH	0.987471	1
BRADI3g38970	bHLH	0.989924	1
BRADI3g45360	bHLH	0.910478	1
BRADI3g46200	bHLH	0.998087	1
BRADI1g09177	bHLH	0.765905	1
BRADI3g58360	bHLH	0.996197	1
BRADI4g14190	bHLH	0.76921	1
BRADI5g01900	bHLH	0.992366	1
BRADI5g22920	bHLH	0.852402	1
BRADI1g25230	bHLH	0.982985	1
BRADI1g35990	bHLH	0.998031	1
BRADI1g04510	bZIP	0.996197	1
BRADI1g68560	bZIP	0.93972	1
BRADI2g15940	bZIP	0.988503	1
BRADI2g24120	bZIP	0.932993	1
BRADI2g25400	bZIP	0.957137	1
BRADI2g40582	bZIP	0.986962	1
BRADI2g45567	bZIP	0.990361	1
BRADI2g53060	bZIP	0.99891	1
BRADI2g56096	bZIP	0.998044	1
BRADI3g15590	bZIP	0.999984	1
BRADI3g38200	bZIP	0.968965	1
BRADI3g57960	bZIP	0.9987	1
BRADI4g04720	bZIP	0.998029	1
BRADI1g07310	bZIP	0.990323	1
BRADI4g42120	bZIP	0.996197	1
BRADI1g30750	bZIP	0.9987	1
BRADI1g46060	bZIP	0.979927	1
BRADI3g01483	C2H2	0.999934	1
BRADI1g71330	C2H2	0.989034	1
BRADI2g14120	C2H2	0.985531	1
BRADI2g41550	C2H2	0.985297	1
BRADI2g58261	C2H2	0.881048	1
BRADI2g58720	C2H2	0.661916	1
BRADI1g11760	C3H	0.898653	1
BRADI2g05750	C3H	0.967415	1
BRADI2g33270	C3H	0.99914	1
BRADI2g54220	C3H	0.97368	1
BRADI5g02300	C3H	0.959495	1
BRADI3g19010	CO-like	0.970375	1
BRADI1g55710	CPP	0.98767	1
BRADI3g34670	CPP	0.913404	1
BRADI4g02410	CPP	0.999675	1
BRADI1g35030	DBB	0.999775	1
BRADI2g06370	DBB	0.987997	1
BRADI4g33000	Dof	0.989022	1
BRADI1g45470	ERF	0.949285	1
BRADI2g31480	ERF	0.976176	1
BRADI3g06562	ERF	0.876119	1
BRADI3g08790	ERF	0.994986	1
BRADI3g31600	ERF	0.979907	1
BRADI3g35560	ERF	0.563854	1
BRADI3g41543	ERF	0.992149	1
BRADI3g41547	ERF	0.88024	1
BRADI1g46690	ERF	0.982529	1
BRADI3g50508	ERF	0.996197	1
BRADI4g27850	ERF	0.944465	1
BRADI4g29010	ERF	0.986601	1
BRADI5g08380	ERF	0.914032	1
BRADI5g17640	ERF	0.906112	1
BRADI1g48320	ERF	0.989638	1
BRADI1g54450	ERF	0.996197	1
BRADI2g06180	ERF	0.986284	1
BRADI2g29960	ERF	0.982363	1
BRADI1g13310	FAR1	0.936236	1
BRADI4g15566	FAR1	0.91353	1
BRADI4g00925	FAR1	0.832043	1
BRADI5g20520	G2-like	0.988836	1
BRADI1g58830	G2-like	0.864856	1
BRADI1g03020	GATA	0.958456	1
BRADI2g62660	GATA	0.955784	1
BRADI3g03800	GATA	0.94313	1
BRADI3g08240	GATA	0.834435	1
BRADI3g54720	GATA	0.974618	1
BRADI4g09196	GRAS	0.960683	1
BRADI5g19190	GRAS	0.963634	1
BRADI1g50597	GRF	0.993848	1
BRADI5g20607	GRF	0.954023	1
BRADI4g03303	HB-other	0.889144	1
BRADI1g13910	HD-ZIP	0.953212	1
BRADI4g35910	HD-ZIP	0.970151	1
BRADI5g17170	HD-ZIP	0.998921	1
BRADI1g71280	HD-ZIP	0.995326	1
BRADI3g21480	HD-ZIP	0.976261	1
BRADI3g35850	HD-ZIP	0.92206	1
BRADI3g38600	HD-ZIP	0.963588	1
BRADI3g46320	HD-ZIP	0.973378	1
BRADI3g50220	HD-ZIP	0.998433	1
BRADI4g29380	HD-ZIP	0.92002	1
BRADI1g38140	HSF	0.902776	1
BRADI2g41530	HSF	0.998261	1
BRADI2g48990	HSF	0.973272	1
BRADI3g08870	HSF	0.998667	1
BRADI3g26920	HSF	0.783845	1
BRADI3g42130	HSF	0.992398	1
BRADI4g32130	HSF	0.793722	1
BRADI4g35780	HSF	0.982091	1
BRADI2g53690	LBD	0.923411	1
BRADI1g72150	MIKC_MADS	0.906761	1
BRADI3g32090	MIKC_MADS	0.638614	1
BRADI5g21700	MIKC_MADS	0.996197	1
BRADI2g59119	M-type_MADS	0.622876	1
BRADI2g46770	MYB	0.990499	1
BRADI3g28830	MYB	0.990738	1
BRADI3g36740	MYB	0.994589	1
BRADI3g48886	MYB	0.992324	1
BRADI3g56917	MYB	0.954341	1
BRADI4g03970	MYB	0.9172	1
BRADI4g08220	MYB	0.96946	1
BRADI4g23967	MYB	0.951227	1
BRADI1g64687	MYB	0.97863	1
BRADI5g20130	MYB	0.718358	1
BRADI2g01960	MYB	0.996197	1
BRADI2g11080	MYB	0.722537	1
BRADI2g17982	MYB	0.993081	1
BRADI5g07300	MYB_related	0.943665	1
BRADI5g19380	MYB_related	0.967162	1
BRADI2g02810	MYB_related	0.998593	1
BRADI2g05590	MYB_related	0.991684	1
BRADI2g05760	MYB_related	0.970426	1
BRADI1g04150	NAC	0.669782	1
BRADI2g33307	NAC	0.91231	1
BRADI3g16480	NAC	0.973862	1
BRADI3g33957	NAC	0.96999	1
BRADI3g54817	NAC	0.939575	1
BRADI4g02060	NAC	0.997959	1
BRADI4g03620	NAC	0.846964	1
BRADI4g23640	NAC	0.965964	1
BRADI4g40880	NAC	0.982539	1
BRADI4g44000	NAC	0.99433	1
BRADI5g15587	NAC	0.995371	1
BRADI1g17440	NAC	0.975842	1
BRADI1g17480	NAC	0.958075	1
BRADI1g50057	NAC	0.986204	1
BRADI1g63600	NAC	0.99311	1
BRADI2g24987	NAC	0.99869	1
BRADI2g28020	NAC	0.54994	1
BRADI1g13680	NF-YA	0.980963	1
BRADI1g21762	NF-YA	0.896602	1
BRADI1g72960	NF-YA	0.990548	1
BRADI2g22940	NF-YB	0.962329	1
BRADI2g08600	Nin-like	0.999988	1
BRADI5g09140	S1Fa-like	0.993247	1
BRADI2g59110	SBP	0.984246	1
BRADI2g54940	TALE	0.946431	1
BRADI3g26690	TALE	0.917013	1
BRADI2g06890	TCP	0.962049	1
BRADI3g59320	TCP	0.661757	1
BRADI3g00697	Trihelix	0.923721	1
BRADI3g30457	Trihelix	0.994764	1
BRADI4g37730	Trihelix	0.995652	1
BRADI5g17150	Trihelix	0.799143	1
BRADI3g04450	Whirly	0.965904	1
BRADI2g54720	WRKY	0.993564	1
BRADI1g09170	WRKY	0.808248	1
BRADI1g63910	WRKY	0.995863	1
BRADI2g08620	WRKY	0.986031	1
BRADI2g00950	Bd_1	0.932524	2
BRADI3g59490	Bd_12	0.923956	2
BRADI4g37555	Bd_14	0.949609	2
BRADI1g76470	Bd_16	0.973503	2
BRADI1g71667	Bd_17	0.999468	2
BRADI1g68680	Bd_18	0.836988	2
BRADI1g63190	Bd_19	0.925246	2
BRADI1g15290	Bd_20	0.96716	2
BRADI1g01880	Bd_23	0.996745	2
BRADI1g01800	Bd_25	0.996712	2
BRADI2g55150	Bd_26	0.968181	2
BRADI5g09530	Bd_28	0.989464	2
BRADI5g12330	Bd_29	0.958415	2
BRADI2g07597	Bd_3	0.960571	2
BRADI5g15261	Bd_31	0.997791	2
BRADI2g24420	Bd_34	0.981232	2
BRADI2g23580	Bd_36	0.912353	2
BRADI2g22650	Bd_37	0.971777	2
BRADI2g40900	Bd_4	0.872885	2
BRADI1g49790	Bd_40	0.965607	2
BRADI1g38687	Bd_42	0.897756	2
BRADI1g58350	Bd_44	0.984621	2
BRADI3g13160	Bd_46	0.926529	2
BRADI2g44856	Bd_5	0.991923	2
BRADI3g38777	Bd_51	0.978161	2
BRADI3g39980	Bd_52	0.830644	2
BRADI4g27450	Bd_53	0.967914	2
BRADI4g31140	Bd_57	0.986373	2
BRADI3g30500	Bd_61	0.94909	2
BRADI4g42997	Bd_63	0.800527	2
BRADI4g17917	Bd_65	0.869672	2
BRADI4g08030	Bd_67	0.966463	2
BRADI3g00330	Bd_8	0.949592	2
BRADI3g36820	AP2	0.940483	2
BRADI2g50120	ARF	0.871014	2
BRADI5g10950	ARF	0.977268	2
BRADI1g47400	ARR-B	0.983965	2
BRADI3g06120	ARR-B	0.702141	2
BRADI1g05430	bHLH	0.988986	2
BRADI2g20720	bHLH	0.981898	2
BRADI2g60970	bHLH	0.847757	2
BRADI1g06670	bHLH	0.906946	2
BRADI3g33170	bHLH	0.998329	2
BRADI3g39927	bHLH	0.994369	2
BRADI3g48070	bHLH	0.974618	2
BRADI3g52790	bHLH	0.988221	2
BRADI1g10170	bHLH	0.959651	2
BRADI1g13980	bHLH	0.990634	2
BRADI1g63840	bZIP	0.955242	2
BRADI2g52590	bZIP	0.951599	2
BRADI1g05480	bZIP	0.978704	2
BRADI2g55567	bZIP	0.962579	2
BRADI3g02730	bZIP	0.973156	2
BRADI3g02980	bZIP	0.866763	2
BRADI3g07540	bZIP	0.966399	2
BRADI4g02570	bZIP	0.953606	2
BRADI1g30140	bZIP	0.755322	2
BRADI1g43900	bZIP	0.908426	2
BRADI1g23470	C2H2	0.98981	2
BRADI1g68570	C2H2	0.991932	2
BRADI2g58770	C3H	0.935634	2
BRADI4g08050	C3H	0.980539	2
BRADI4g19010	C3H	0.958415	2
BRADI1g11310	CO-like	0.830497	2
BRADI1g31280	CO-like	0.988179	2
BRADI1g43990	CO-like	0.953787	2
BRADI3g05800	CO-like	0.925129	2
BRADI3g48447	CO-like	0.818923	2
BRADI5g14600	CO-like	0.991996	2
BRADI4g35950	DBB	0.940245	2
BRADI5g14280	DBB	0.994453	2
BRADI5g17080	DBB	0.997021	2
BRADI2g09720	Dof	0.963805	2
BRADI3g25670	Dof	0.982539	2
BRADI5g18640	Dof	0.889648	2
BRADI2g60340	ERF	0.896369	2
BRADI5g17480	ERF	0.858939	2
BRADI1g72457	ERF	0.916606	2
BRADI4g40020	FAR1	0.946494	2
BRADI1g19740	FAR1	0.976648	2
BRADI1g67740	FAR1	0.942526	2
BRADI3g09160	G2-like	0.899092	2
BRADI3g52320	G2-like	0.955378	2
BRADI4g27607	G2-like	0.971651	2
BRADI1g34470	G2-like	0.97471	2
BRADI5g17370	GATA	0.93063	2
BRADI1g23350	GRAS	0.898787	2
BRADI3g16400	LSD	0.967006	2
BRADI4g06867	MIKC_MADS	0.946494	2
BRADI3g42350	MYB	0.941164	2
BRADI4g04050	MYB	0.904702	2
BRADI2g23310	MYB	0.945451	2
BRADI2g23341	MYB	0.736999	2
BRADI2g24400	MYB	0.850795	2
BRADI1g29680	MYB_related	0.937589	2
BRADI3g14830	MYB_related	0.9705	2
BRADI3g16515	MYB_related	0.951663	2
BRADI3g33440	MYB_related	0.814427	2
BRADI3g51757	MYB_related	0.980566	2
BRADI3g52807	MYB_related	0.959644	2
BRADI2g13860	MYB_related	0.998512	2
BRADI2g16120	MYB_related	0.90397	2
BRADI2g42870	MYB_related	0.985909	2
BRADI2g44520	MYB_related	0.993877	2
BRADI2g53260	NAC	0.952158	2
BRADI2g55780	NAC	0.938814	2
BRADI3g13630	NAC	0.986277	2
BRADI3g13727	NAC	0.905212	2
BRADI3g41470	NAC	0.961914	2
BRADI2g25150	NAC	0.977315	2
BRADI1g21900	NF-YB	0.989748	2
BRADI1g60030	NF-YB	0.957987	2
BRADI1g67980	NF-YC	0.98454	2
BRADI4g37147	Nin-like	0.889867	2
BRADI1g09615	TALE	0.98679	2
BRADI1g30730	TALE	0.938503	2
BRADI1g51980	TALE	0.943861	2
BRADI2g59240	TCP	0.87486	2
BRADI4g41430	TCP	0.836473	2
BRADI3g44370	Trihelix	0.978279	2
BRADI5g08600	Trihelix	0.9965	2
BRADI2g45480	WRKY	0.856498	2
BRADI3g09810	WRKY	0.840563	2
BRADI3g34567	WRKY	0.927241	2
BRADI1g59180	WRKY	0.92735	2
BRADI2g44035	WRKY	0.97435	2
BRADI2g44540	ZF-HD	0.998754	2
BRADI3g37040	ZF-HD	0.90176	2
BRADI4g21160	ZF-HD	0.969912	2
BRADI4g30240	ZF-HD	0.965631	2
BRADI4g32580	ZF-HD	0.987218	2
BRADI4g40270	ZF-HD	0.900638	2
BRADI1g30110	Bd_43	0.812883	3
BRADI3g11060	Bd_60	0.631328	3
BRADI3g31850	Bd_62	0.821245	3
BRADI1g69209	AP2	0.955623	3
BRADI2g07986	B3	0.802019	3
BRADI2g39970	bHLH	0.958531	3
BRADI4g17460	bHLH	0.925737	3
BRADI2g52860	bZIP	0.833785	3
BRADI1g14750	C2H2	0.893054	3
BRADI1g74997	C2H2	0.82141	3
BRADI3g57000	CO-like	0.930507	3
BRADI1g49260	DBB	0.91931	3
BRADI3g48180	DBB	0.767138	3
BRADI1g03710	Dof	0.698055	3
BRADI1g17410	Dof	0.982292	3
BRADI1g26570	Dof	0.662364	3
BRADI3g39970	EIL	0.918798	3
BRADI2g60331	ERF	0.873044	3
BRADI3g42627	ERF	0.78592	3
BRADI2g09434	ERF	0.921166	3
BRADI1g26980	FAR1	0.975082	3
BRADI3g10416	FAR1	0.743617	3
BRADI3g16121	FAR1	0.865469	3
BRADI3g45470	FAR1	0.808075	3
BRADI1g32370	G2-like	0.982111	3
BRADI3g25597	G2-like	0.592393	3
BRADI1g43710	G2-like	0.915182	3
BRADI2g04810	G2-like	0.822562	3
BRADI2g08287	G2-like	0.984559	3
BRADI2g62067	G2-like	0.861406	3
BRADI1g37480	GATA	0.964455	3
BRADI2g35057	GATA	0.827984	3
BRADI1g23060	GRAS	0.883298	3
BRADI3g50930	GRAS	0.854023	3
BRADI4g03867	GRAS	0.705932	3
BRADI4g44093	GRAS	0.863566	3
BRADI3g15327	HD-ZIP	0.944979	3
BRADI3g13570	MIKC_MADS	0.81495	3
BRADI2g55217	MYB_related	0.651134	3
BRADI1g41993	MYB_related	0.879196	3
BRADI2g57297	NAC	0.853209	3
BRADI1g14467	NAC	0.983313	3
BRADI4g34022	NAC	0.999701	3
BRADI4g34800	NAC	0.955947	3
BRADI3g15670	NF-YB	0.834394	3
BRADI2g08177	Nin-like	0.858865	3
BRADI2g02720	RAV	0.808975	3
BRADI4g34667	SBP	0.759725	3
BRADI1g74060	TALE	0.938049	3
BRADI3g32040	TALE	0.884469	3
BRADI4g00740	TALE	0.953353	3
BRADI1g58450	TCP	0.911551	3
BRADI1g08106	WRKY	0.762486	3
BRADI4g09886	WRKY	0.841696	3
BRADI4g30360	WRKY	0.911775	3
BRADI1g22680	WRKY	0.916391	3
BRADI5g10470	ZF-HD	0.936614	3
BRADI2g39710	Bd_2	0.957025	4
BRADI1g08907	Bd_22	0.976492	4
BRADI5g08240	Bd_27	0.946305	4
BRADI5g14530	Bd_30	0.936823	4
BRADI2g24050	Bd_35	0.99203	4
BRADI2g20680	Bd_38	0.529971	4
BRADI1g25937	Bd_45	0.927912	4
BRADI3g14790	Bd_47	0.665054	4
BRADI3g21730	Bd_49	0.923808	4
BRADI4g30750	Bd_55	0.930072	4
BRADI4g05890	Bd_69	0.965027	4
BRADI2g26987	AP2	0.882816	4
BRADI4g30617	AP2	0.522175	4
BRADI1g48690	B3	0.98688	4
BRADI3g12910	B3	0.805525	4
BRADI3g18810	B3	0.981153	4
BRADI2g47730	bHLH	0.512162	4
BRADI2g61050	bHLH	0.66532	4
BRADI3g01540	bHLH	0.97019	4
BRADI3g15440	bHLH	0.794067	4
BRADI3g40860	bHLH	0.925375	4
BRADI3g43250	bHLH	0.959318	4
BRADI4g34350	bHLH	0.946404	4
BRADI1g12780	bHLH	0.984379	4
BRADI1g25470	bHLH	0.987463	4
BRADI4g32920	bZIP	0.899099	4
BRADI1g17210	bZIP	0.377704	4
BRADI1g31700	bZIP	0.95045	4
BRADI3g56490	CO-like	0.931526	4
BRADI4g40250	DBB	0.8648	4
BRADI2g52370	ERF	0.836161	4
BRADI1g72449	ERF	0.957328	4
BRADI1g20830	FAR1	0.939423	4
BRADI1g63530	G2-like	0.971516	4
BRADI2g21880	G2-like	0.753574	4
BRADI1g12330	GATA	0.794687	4
BRADI2g12590	GATA	0.950757	4
BRADI3g52547	GRF	0.949795	4
BRADI1g74350	HSF	0.880538	4
BRADI1g14780	LBD	0.949721	4
BRADI4g02040	LSD	0.94867	4
BRADI3g39177	M-type_MADS	0.9837	4
BRADI3g41297	M-type_MADS	0.480363	4
BRADI4g30081	M-type_MADS	0.943468	4
BRADI1g20586	MYB	0.932855	4
BRADI2g11676	MYB	0.978657	4
BRADI3g33400	MYB_related	0.793513	4
BRADI1g26720	SBP	0.916785	4
BRADI1g76970	TALE	0.463202	4
BRADI2g50687	TCP	0.860338	4
BRADI3g38682	Trihelix	0.99398	4
BRADI1g13207	WRKY	0.491432	4
BRADI2g15872	WRKY	0.919807	4

## Sheet: H. vulgare
Gene ID	TF class	score	Cluster
HORVU6Hr1G083050	Hv_13	0.928045	1
HORVU4Hr1G088860	Hv_15	0.989251	1
HORVU5Hr1G121250	Hv_25	0.997413	1
HORVU1Hr1G066100	Hv_38	0.817541	1
HORVU1Hr1G080360	Hv_39	0.87009	1
HORVU3Hr1G112600	Hv_4	0.726426	1
HORVU7Hr1G047700	Hv_41	0.99804	1
HORVU7Hr1G079430	Hv_42	0.946945	1
HORVU5Hr1G053950	Hv_53	0.975789	1
HORVU5Hr1G081500	Hv_58	0.733705	1
HORVU1Hr1G038680	Hv_59	0.89453	1
HORVU2Hr1G109370	Hv_64	0.86561	1
HORVU6Hr1G000070	Hv_68	0.874521	1
HORVU1Hr1G056500	AP2	0.524205	1
HORVU3Hr1G097200	ARF	0.993887	1
HORVU6Hr1G020330	ARF	0.985156	1
HORVU7Hr1G030000	ARR-B	0.976663	1
HORVU7Hr1G030050	ARR-B	0.997391	1
HORVU1Hr1G007010	B3	0.98636	1
HORVU4Hr1G084850	bHLH	0.93456	1
HORVU3Hr1G000170	bHLH	0.859558	1
HORVU5Hr1G103280	C3H	0.996012	1
HORVU2Hr1G092460	DBB	0.849223	1
HORVU7Hr1G032750	ERF	0.807374	1
HORVU5Hr1G018220	G2-like	0.975278	1
HORVU5Hr1G097560	G2-like	0.924398	1
HORVU2Hr1G021950	HB-other	0.924554	1
HORVU3Hr1G020400	HB-other	0.986431	1
HORVU2Hr1G092710	HD-ZIP	0.976609	1
HORVU2Hr1G097940	HD-ZIP	0.872634	1
HORVU4Hr1G070610	HD-ZIP	0.431423	1
HORVU5Hr1G059410	HD-ZIP	0.983774	1
HORVU5Hr1G081090	HD-ZIP	0.942118	1
HORVU6Hr1G061390	HD-ZIP	0.930993	1
HORVU3Hr1G069590	HSF	0.908237	1
HORVU3Hr1G021310	MYB_related	0.609236	1
HORVU1Hr1G063740	NAC	0.89626	1
HORVU6Hr1G019380	NAC	0.930556	1
HORVU7Hr1G072670	NAC	0.762627	1
HORVU5Hr1G099390	NAC	0.854326	1
HORVU2Hr1G039640	NAC	0.913136	1
HORVU4Hr1G051360	NAC	0.800678	1
HORVU5Hr1G011650	NAC	0.682735	1
HORVU1Hr1G071620	NF-YB	0.993878	1
HORVU6Hr1G076040	Hv_12	0.95066	2
HORVU5Hr1G088200	Hv_14	0.938716	2
HORVU5Hr1G082420	Hv_20	0.984164	2
HORVU5Hr1G094400	Hv_22	0.956082	2
HORVU5Hr1G120650	Hv_23	0.776823	2
HORVU3Hr1G085270	Hv_26	0.938085	2
HORVU2Hr1G070140	Hv_27	0.894685	2
HORVU2Hr1G073370	Hv_28	0.996165	2
HORVU7Hr1G011890	Hv_40	0.640398	2
HORVU2Hr1G060480	Hv_44	0.985829	2
HORVU7Hr1G077740	Hv_46	0.577541	2
HORVU3Hr1G057090	Hv_5	0.993258	2
HORVU2Hr1G085300	Hv_51	0.869192	2
HORVU5Hr1G062450	Hv_57	0.876077	2
HORVU5Hr1G046480	Hv_66	0.960879	2
HORVU2Hr1G036220	Hv_67	0.604031	2
HORVU5Hr1G025950	Hv_69	0.985005	2
HORVU6Hr1G012320	Hv_9	0.958446	2
HORVU5Hr1G122180	B3	0.334194	2
HORVU6Hr1G054050	B3	0.870141	2
HORVU5Hr1G073170	bHLH	0.986462	2
HORVU5Hr1G106120	bZIP	0.668922	2
HORVU5Hr1G081190	DBB	0.997221	2
HORVU6Hr1G028150	DBB	0.894026	2
HORVU6Hr1G073040	MIKC_MADS	0.430658	2
HORVU4Hr1G054420	MYB	0.809389	2
HORVU1Hr1G089460	MYB_related	0.928024	2
HORVU7Hr1G070870	MYB_related	0.951911	2
HORVU7Hr1G121210	MYB_related	0.960752	2
HORVU1Hr1G089490	MYB_related	0.960124	2
HORVU1Hr1G089500	MYB_related	0.98676	2
HORVU1Hr1G089570	MYB_related	0.96436	2
HORVU1Hr1G091520	MYB_related	0.943561	2
HORVU1Hr1G091540	MYB_related	0.907556	2
HORVU3Hr1G052710	MYB_related	0.908781	2
HORVU3Hr1G090440	NAC	0.964897	2
HORVU2Hr1G048280	SBP	0.98449	2
HORVU7Hr1G114650	TALE	0.981444	2
HORVU0Hr1G016330	Hv_10	0.906007	3
HORVU6Hr1G001950	Hv_11	0.872158	3
HORVU4Hr1G050230	Hv_19	0.765035	3
HORVU1Hr1G002600	Hv_2	0.756291	3
HORVU4Hr1G005920	Hv_21	0.860259	3
HORVU5Hr1G121570	Hv_24	0.912358	3
HORVU2Hr1G104110	Hv_32	0.990361	3
HORVU1Hr1G028030	Hv_33	0.974931	3
HORVU1Hr1G074180	Hv_35	0.919352	3
HORVU1Hr1G073010	Hv_36	0.99898	3
HORVU1Hr1G070640	Hv_37	0.978246	3
HORVU7Hr1G116880	Hv_43	0.930337	3
HORVU7Hr1G073050	Hv_48	0.881656	3
HORVU1Hr1G086450	Hv_49	0.928105	3
HORVU1Hr1G081550	Hv_50	0.978027	3
HORVU5Hr1G054060	Hv_54	0.878047	3
HORVU5Hr1G062490	Hv_56	0.952688	3
HORVU3Hr1G069650	Hv_6	0.885835	3
HORVU1Hr1G049260	Hv_62	0.946471	3
HORVU5Hr1G042740	Hv_63	0.934138	3
HORVU4Hr1G023390	Hv_65	0.920189	3
HORVU4Hr1G014290	B3	0.710442	3
HORVU5Hr1G093960	bHLH	0.947259	3
HORVU5Hr1G054510	bZIP	0.931125	3
HORVU7Hr1G093580	bZIP	0.991882	3
HORVU5Hr1G073380	EIL	0.98145	3
HORVU1Hr1G055710	ERF	0.929891	3
HORVU4Hr1G077310	ERF	0.593945	3
HORVU6Hr1G082880	ERF	0.583015	3
HORVU6Hr1G062380	ERF	0.887936	3
HORVU7Hr1G107670	G2-like	0.586234	3
HORVU7Hr1G107630	G2-like	0.894316	3
HORVU2Hr1G043780	GRAS	0.981685	3
HORVU5Hr1G067010	HD-ZIP	0.992931	3
HORVU1Hr1G081300	HSF	0.997137	3
HORVU4Hr1G002480	LBD	0.942076	3
HORVU3Hr1G082210	MYB	0.66167	3
HORVU5Hr1G111590	NAC	0.943892	3
HORVU2Hr1G017370	NAC	0.858251	3
HORVU3Hr1G036380	NAC	0.989622	3
HORVU1Hr1G082670	RAV	0.910374	3
HORVU0Hr1G001430	WRKY	0.991558	3
HORVU3Hr1G088200	WRKY	0.974815	3
HORVU4Hr1G002390	WRKY	0.91698	3
HORVU5Hr1G056130	WRKY	0.846313	3
HORVU5Hr1G065420	WRKY	0.984067	3
HORVU6Hr1G028790	WRKY	0.983875	3
HORVU7Hr1G083270	WRKY	0.989583	3
HORVU7Hr1G113850	WRKY	0.99207	3
HORVU0Hr1G030830	WRKY	0.972487	3
HORVU1Hr1G070250	WRKY	0.951841	3
HORVU2Hr1G017740	WRKY	0.916037	3
HORVU2Hr1G065750	WRKY	0.97722	3
HORVU2Hr1G109330	WRKY	0.926399	3
HORVU3Hr1G000900	Hv_1	0.971693	4
HORVU4Hr1G082700	Hv_16	0.703998	4
HORVU4Hr1G071730	Hv_17	0.722196	4
HORVU4Hr1G064440	Hv_18	0.983346	4
HORVU0Hr1G004830	Hv_29	0.850461	4
HORVU3Hr1G031020	Hv_3	0.980451	4
HORVU2Hr1G085650	Hv_30	0.834599	4
HORVU2Hr1G088110	Hv_31	0.938894	4
HORVU1Hr1G075120	Hv_34	0.932124	4
HORVU2Hr1G046050	Hv_45	0.991766	4
HORVU7Hr1G073060	Hv_47	0.952158	4
HORVU7Hr1G050660	Hv_52	0.972917	4
HORVU5Hr1G063820	Hv_55	0.784184	4
HORVU7Hr1G026300	Hv_60	0.9562	4
HORVU6Hr1G076880	Hv_61	0.80833	4
HORVU3Hr1G078680	Hv_7	0.950742	4
HORVU6Hr1G000650	Hv_8	0.976814	4
HORVU3Hr1G105790	B3	0.919385	4
HORVU1Hr1G071330	bHLH	0.634596	4
HORVU2Hr1G095870	bHLH	0.382519	4
HORVU2Hr1G096810	bHLH	0.392691	4
HORVU5Hr1G014170	bZIP	0.690925	4
HORVU6Hr1G080870	C2H2	0.868461	4
HORVU5Hr1G080300	ERF	0.671503	4
HORVU3Hr1G086210	GRAS	0.882964	4
HORVU4Hr1G065900	HD-ZIP	0.925109	4
HORVU4Hr1G018360	MYB	0.971683	4
HORVU3Hr1G085180	MYB_related	0.960384	4
HORVU1Hr1G091530	MYB_related	0.870658	4
HORVU7Hr1G076250	NAC	0.90349	4
HORVU1Hr1G064300	NAC	0.881943	4
HORVU4Hr1G017430	NAC	0.961351	4
HORVU4Hr1G081430	NAC	0.820646	4
HORVU2Hr1G032320	NF-YB	0.89788	4
HORVU3Hr1G072670	TCP	0.987257	4
HORVU2Hr1G034420	WRKY	0.7233	4
HORVU3Hr1G050590	WRKY	0.899453	4
HORVU3Hr1G059220	WRKY	0.91978	4

## Sheet: O. sativa
Gene ID	TF class	score	Cluster
Os03g0129300	Os_16	0.953185	1
Os03g0192700	Os_17	0.917754	1
Os03g0744700	Os_22	0.888034	1
Os03g0844900	Os_23	0.973829	1
Os03g0849800	Os_24	0.842087	1
Os04g0234600	Os_26	0.993552	1
Os04g0459500	Os_29	0.667791	1
Os05g0453300	Os_36	0.869672	1
Os05g0501700	Os_38	0.922217	1
Os05g0535900	Os_39	0.996526	1
Os06g0129400	Os_40	0.730763	1
Os06g0528600	Os_42	0.982995	1
Os09g0294000	Os_53	0.712116	1
Os01g0733500	Os_6	0.95371	1
Os10g0530500	Os_62	0.966291	1
Os12g0115700	Os_66	0.929881	1
Os12g0420200	Os_67	0.959408	1
Os12g0428000	Os_68	0.890193	1
Os02g0101500	Os_8	0.667287	1
Os10g0479900	ARF	0.829576	1
Os06g0685700	ARF	0.831664	1
Os01g0670800	ARF	0.9448	1
Os11g0523800	ARF	0.955597	1
Os11g0601700	bHLH	0.988801	1
Os03g0639300	bHLH	0.963339	1
Os04g0631600	bHLH	0.936518	1
Os04g0300600	bHLH	0.993051	1
Os09g0456200	bZIP	0.995251	1
Os02g0766700	bZIP	0.957778	1
Os04g0637000	bZIP	0.965912	1
Os06g0601500	bZIP	0.98573	1
Os06g0211200	bZIP	0.987428	1
Os11g0152700	bZIP	0.896229	1
Os08g0472000	bZIP	0.761385	1
Os02g0823900	C2H2	0.931132	1
Os05g0195200	C3H	0.909463	1
Os01g0192000	C3H	0.930382	1
Os02g0610500	CO-like	0.959253	1
Os05g0204600	DBB	0.952087	1
Os02g0655200	ERF	0.942261	1
Os05g0497200	ERF	0.942674	1
Os06g0166400	ERF	0.929914	1
Os03g0718200	FAR1	0.939816	1
Os07g0119300	G2-like	0.945442	1
Os03g0654600	G2-like	0.484372	1
Os06g0571800	GATA	0.959699	1
Os10g0369600	GRAS	0.97482	1
Os05g0320300	HB-other	0.894161	1
Os04g0541700	HD-ZIP	0.973896	1
Os10g0480200	HD-ZIP	0.816698	1
Os07g0178600	HSF	0.932929	1
Os10g0419300	HSF	0.935421	1
Os02g0731200	MIKC_MADS	0.650985	1
Os06g0712700	MIKC_MADS	0.991001	1
Os06g0258000	MYB	0.971221	1
Os01g0874300	MYB	0.823973	1
Os12g0567300	MYB	0.679343	1
Os05g0195700	MYB_related	0.997414	1
Os01g0192300	MYB_related	0.941027	1
Os06g0728700	MYB_related	0.995292	1
Os08g0144000	MYB_related	0.940667	1
Os08g0157600	MYB_related	0.983257	1
Os02g0680700	MYB_related	0.841004	1
Os12g0123700	NAC	0.887933	1
Os02g0285900	NAC	0.979907	1
Os04g0460600	NAC	0.947324	1
Os06g0101800	NAC	0.985339	1
Os08g0436700	NAC	0.996801	1
Os03g0696300	NF-X1	0.867089	1
Os03g0174900	NF-X1	0.980014	1
Os03g0647600	NF-X1	0.91984	1
Os08g0196700	NF-X1	0.95082	1
Os01g0102400	NF-YC	0.997048	1
Os07g0152000	TCP	0.596882	1
Os03g0741400	WRKY	0.890815	1
Os05g0322900	WRKY	0.840745	1
Os12g0116400	WRKY	0.895625	1
Os01g0821600	WRKY	0.992154	1
Os09g0417600	WRKY	0.771955	1
Os09g0417800	WRKY	0.750247	1
Os01g0111100	Os_1	0.817146	2
Os02g0744000	Os_12	0.973632	2
Os03g0592500	Os_20	0.853305	2
Os04g0414700	Os_28	0.957881	2
Os06g0486800	Os_41	0.517185	2
Os07g0148900	Os_44	0.821445	2
Os01g0639900	Os_5	0.648112	2
Os08g0485900	Os_51	0.982056	2
Os08g0508800	Os_52	0.917007	2
Os10g0502400	Os_60	0.682827	2
Os10g0516100	Os_61	0.896705	2
Os12g0534100	Os_69	0.838484	2
Os02g0465900	Os_9	0.929284	2
Os05g0121600	AP2	0.783979	2
Os03g0120900	B3	0.91155	2
Os03g0782500	bHLH	0.947828	2
Os01g0952800	bHLH	0.909384	2
Os02g0603600	bHLH	0.887008	2
Os02g0128200	bZIP	0.979719	2
Os09g0306400	bZIP	0.882854	2
Os01g0813100	bZIP	0.961862	2
Os08g0357300	bZIP	0.871127	2
Os12g0601800	bZIP	0.744086	2
Os01g0202500	DBB	0.887699	2
Os03g0169600	Dof	0.707202	2
Os09g0434500	ERF	0.993514	2
Os09g0287000	ERF	0.908361	2
Os11g0151002	FAR1	0.92271	2
Os10g0463400	G2-like	0.716277	2
Os05g0155400	GATA	0.940754	2
Os03g0193000	GRAS	0.701076	2
Os03g0769800	HB-other	0.955165	2
Os08g0159500	LBD	0.911991	2
Os05g0114700	MYB	0.47178	2
Os01g0663051	MYB_related	0.848544	2
Os05g0567600	MYB_related	0.814559	2
Os01g0975300	MYB_related	0.981417	2
Os06g0131700	NAC	0.331758	2
Os03g0327800	NAC	0.201357	2
Os12g0610600	NAC	0.68451	2
Os01g0158900	NF-X1	0.939173	2
Os03g0413000	NF-YB	0.800124	2
Os03g0251350	NF-YC	0.894212	2
Os02g0539600	Trihelix	0.974798	2
Os06g0145800	Whirly	0.820436	2
Os06g0146250	WRKY	0.731975	2
Os03g0657400	WRKY	0.843535	2
Os05g0474800	WRKY	0.905585	2
Os02g0626400	Os_10	0.320326	3
Os02g0815700	Os_14	0.936013	3
Os03g0114800	Os_15	0.566115	3
Os03g0336000	Os_19	0.979571	3
Os03g0850400	Os_25	0.497773	3
Os04g0390100	Os_27	0.983164	3
Os01g0227800	Os_3	0.968942	3
Os05g0186300	Os_33	0.994968	3
Os01g0551000	Os_4	0.901103	3
Os07g0524900	Os_45	0.974231	3
Os08g0104600	Os_46	0.812601	3
Os09g0426800	Os_55	0.478872	3
Os09g0438000	Os_56	0.574681	3
Os09g0438100	Os_57	0.959168	3
Os09g0532000	Os_58	0.798892	3
Os10g0462900	Os_59	0.932539	3
Os05g0536250	AP2	0.878157	3
Os11g0197600	B3	0.982503	3
Os01g0105700	bHLH	0.904539	3
Os01g0108400	bHLH	0.773004	3
Os01g0159800	bHLH	0.938357	3
Os03g0797600	bHLH	0.941116	3
Os09g0474100	bHLH	0.77489	3
Os07g0644100	bZIP	0.992587	3
Os01g0174000	bZIP	0.991127	3
Os01g0867300	bZIP	0.987365	3
Os05g0411300	bZIP	0.945188	3
Os09g0431900	C2H2	0.908818	3
Os05g0128200	C3H	0.991612	3
Os03g0711100	CO-like	0.946442	3
Os04g0497700	CO-like	0.950289	3
Os06g0654900	CO-like	0.956637	3
Os06g0713000	DBB	0.928591	3
Os02g0606200	DBB	0.948762	3
Os07g0508700	Dof	0.932631	3
Os01g0797600	ERF	0.936668	3
Os05g0572000	ERF	0.962561	3
Os04g0669200	ERF	0.992661	3
Os03g0815800	ERF	0.990391	3
Os08g0408500	ERF	0.970655	3
Os01g0239000	G2-like	0.931752	3
Os03g0764600	G2-like	0.860933	3
Os01g0948200	GRAS	0.968617	3
Os09g0379600	HD-ZIP	0.915173	3
Os04g0548700	HD-ZIP	0.996733	3
Os04g0569100	HD-ZIP	0.724794	3
Os03g0161900	HSF	0.850074	3
Os08g0546800	HSF	0.876277	3
Os09g0526600	HSF	0.940746	3
Os03g0609500	LBD	0.995036	3
Os07g0432800	MYB	0.516085	3
Os01g0863300	MYB	0.971967	3
Os01g0305900	MYB	0.958497	3
Os09g0491644	MYB_related	0.993948	3
Os07g0684800	NAC	0.912398	3
Os08g0544800	TCP	0.978925	3
Os05g0513100	TCP	0.992252	3
Os02g0174300	Trihelix	0.846881	3
Os10g0516500	Trihelix	0.800482	3
Os05g0583000	WRKY	0.906531	3
Os12g0116700	WRKY	0.980473	3
Os11g0117400	WRKY	0.787156	3
Os12g0116600	WRKY	0.937917	3
Os05g0579300	ZF-HD	0.845218	3
Os09g0466400	ZF-HD	0.99431	3
Os02g0710900	Os_11	0.706794	4
Os02g0783625	Os_13	0.692454	4
Os03g0238300	Os_18	0.701389	4
Os01g0117300	Os_2	0.713914	4
Os03g0700700	Os_21	0.458436	4
Os04g0496000	Os_30	0.993272	4
Os04g0508800	Os_31	0.969948	4
Os04g0618200	Os_32	0.908866	4
Os05g0429500	Os_34	0.579168	4
Os05g0439400	Os_35	0.727173	4
Os05g0468900	Os_37	0.528441	4
Os06g0716000	Os_43	0.947025	4
Os08g0141300	Os_47	0.925867	4
Os08g0141400	Os_48	0.966451	4
Os08g0364900	Os_49	0.823066	4
Os08g0434300	Os_50	0.568589	4
Os09g0297000	Os_54	0.759894	4
Os11g0145200	Os_63	0.835501	4
Os11g0455500	Os_64	0.929694	4
Os11g0520500	Os_65	0.776305	4
Os01g0803200	Os_7	0.97281	4
Os03g0741100	bHLH	0.990235	4
Os01g0575200	bHLH	0.952596	4
Os01g0928000	bHLH	0.917839	4
Os03g0391700	bHLH	0.886471	4
Os08g0506700	bHLH	0.951167	4
Os03g0306700	bZIP	0.615487	4
Os07g0686100	bZIP	0.959675	4
Os02g0132500	bZIP	0.912136	4
Os06g0662200	bZIP	0.938338	4
Os05g0129300	bZIP	0.957118	4
Os06g0622700	bZIP	0.978864	4
Os12g0194600	bZIP	0.771262	4
Os02g0572900	C2H2	0.720925	4
Os07g0569700	C2H2	0.916913	4
Os03g0764100	C2H2	0.94366	4
Os07g0568300	C3H	0.998617	4
Os08g0536300	CO-like	0.864611	4
Os06g0298200	CO-like	0.931197	4
Os04g0540200	DBB	0.85123	4
Os01g0277500	Dof	0.805356	4
Os02g0726300	Dof	0.89329	4
Os01g0673700	Dof	0.969077	4
Os04g0546800	ERF	0.763748	4
Os07g0617000	ERF	0.958305	4
Os01g0868000	ERF	0.867909	4
Os09g0286600	ERF	0.851178	4
Os04g0610400	ERF	0.807826	4
Os02g0654700	ERF	0.952649	4
Os02g0782700	ERF	0.985124	4
Os05g0497300	ERF	0.522487	4
Os08g0537900	ERF	0.844175	4
Os03g0182800	ERF	0.955765	4
Os06g0670300	G2-like	0.957543	4
Os12g0105600	G2-like	0.855148	4
Os05g0488600	G2-like	0.959329	4
Os11g0705200	GRAS	0.921413	4
Os02g0662700	GRAS	0.7882	4
Os07g0583600	GRAS	0.972486	4
Os01g0881500	GRAS	0.883239	4
Os12g0573200	GRAS	0.874372	4
Os10g0103700	HD-ZIP	0.971446	4
Os10g0561800	HD-ZIP	0.967428	4
Os05g0530400	HSF	0.961026	4
Os03g0639600	LBD	0.920229	4
Os06g0108500	MIKC_MADS	0.758286	4
Os10g0536100	MIKC_MADS	0.986606	4
Os05g0553400	MYB	0.935585	4
Os08g0428200	MYB	0.491289	4
Os03g0720800	MYB	0.759362	4
Os05g0459000	MYB	0.505819	4
Os05g0579600	MYB_related	0.857418	4
Os01g0619900	MYB_related	0.806601	4
Os02g0706400	MYB_related	0.927912	4
Os07g0484700	MYB_related	0.990019	4
Os05g0426200	NAC	0.974469	4
Os03g0327100	NAC	0.918491	4
Os06g0726300	NAC	0.918758	4
Os03g0133000	NAC	0.962803	4
Os01g0884300	NAC	0.927077	4
Os01g0261200	NAC	0.825439	4
Os09g0493700	NAC	0.95022	4
Os03g0777000	NAC	0.960641	4
Os03g0815100	NAC	0.617687	4
Os01g0693400	RAV	0.90869	4
Os05g0549800	RAV	0.821794	4
Os04g0408700	S1Fa-like	0.733731	4
Os01g0292900	SBP	0.902003	4
Os04g0656500	SBP	0.932822	4
Os06g0646600	TALE	0.984713	4
Os01g0763200	TCP	0.99763	4
Os01g0665500	WRKY	0.963117	4
Os08g0386200	WRKY	0.922384	4
Os01g0246700	WRKY	0.987059	4
Os01g0826400	WRKY	0.884624	4
Os06g0158100	WRKY	0.836125	4
Os06g0649000	WRKY	0.985457	4
Os07g0680400	WRKY	0.575656	4
Os12g0507300	WRKY	0.984904	4
Os03g0335200	WRKY	0.995734	4
Os05g0537100	WRKY	0.991924	4
Os05g0183100	WRKY	0.923918	4
Os04g0605100	WRKY	0.932753	4
Os01g0656400	WRKY	0.969487	4
Os05g0343400	WRKY	0.936937	4
Os11g0490900	WRKY	0.673671	4
Os01g0584900	WRKY	0.927926	4
Os09g0334500	WRKY	0.977695	4
Os01g0289600	WRKY	0.582816	4
Os01g0665750	WRKY	0.972595	4
Os02g0181300	WRKY	0.881807	4
Os01g0635550	ZHD	0.877586	4

## Sheet: Z. mays
Gene ID	TF class	score	Cluster
Zm00001d040148	bHLH	0.930934	1
Zm00001d018119	bHLH	0.931005	1
Zm00001d028664	bHLH	0.986842	1
Zm00001d003180	bZIP	0.9538	1
Zm00001d031723	bZIP	0.981124	1
Zm00001d039065	bZIP	0.98514	1
Zm00001d040500	bZIP	0.933863	1
Zm00001d041604	bZIP	0.587878	1
Zm00001d042721	bZIP	0.987323	1
Zm00001d042777	bZIP	0.757329	1
Zm00001d046937	bZIP	0.573971	1
Zm00001d053703	bZIP	0.912075	1
Zm00001d012294	bZIP	0.69834	1
Zm00001d012296	bZIP	0.971917	1
Zm00001d035609	C2H2	0.99715	1
Zm00001d042933	C2H2	0.758354	1
Zm00001d047330	C2H2	0.995279	1
Zm00001d012427	C2H2	0.774661	1
Zm00001d012968	C2H2	0.959652	1
Zm00001d053682	C3H	0.930525	1
Zm00001d028007	CAMTA	0.97296	1
Zm00001d045735	CO-like	0.945257	1
Zm00001d018930	CPP	0.965494	1
Zm00001d038660	CPP	0.997125	1
Zm00001d014765	DBB	0.9015	1
Zm00001d002364	ERF	0.797142	1
Zm00001d026271	ERF	0.791825	1
Zm00001d038320	ERF	0.93814	1
Zm00001d045204	ERF	0.731207	1
Zm00001d002762	ERF	0.93159	1
Zm00001d049889	ERF	0.955547	1
Zm00001d051239	ERF	0.675289	1
Zm00001d053195	ERF	0.982939	1
Zm00001d019744	ERF	0.876353	1
Zm00001d025281	ERF	0.985313	1
Zm00001d013202	G2-like	0.87383	1
Zm00001d034160	G2-like	0.870743	1
Zm00001d051461	GRAS	0.939544	1
Zm00001d028129	HD-ZIP	0.784433	1
Zm00001d047995	HD-ZIP	0.933956	1
Zm00001d017422	HD-ZIP	0.841212	1
Zm00001d028721	LBD	0.986931	1
Zm00001d007891	M-type_MADS	0.99848	1
Zm00001d002476	MYB	0.992947	1
Zm00001d028930	MYB	0.987436	1
Zm00001d037334	MYB	0.876481	1
Zm00001d003064	MYB	0.744244	1
Zm00001d047579	MYB	0.966114	1
Zm00001d048647	MYB	0.980818	1
Zm00001d010201	MYB	0.921012	1
Zm00001d012255	MYB	0.997562	1
Zm00001d044194	MYB_related	0.691229	1
Zm00001d049581	MYB_related	0.730134	1
Zm00001d012285	MYB_related	0.99048	1
Zm00001d042756	MYB_related	0.99653	1
Zm00001d016950	NAC	0.933021	1
Zm00001d023294	NAC	0.969097	1
Zm00001d024543	NAC	0.910902	1
Zm00001d025861	NAC	0.995037	1
Zm00001d028995	NAC	0.939637	1
Zm00001d028999	NAC	0.945486	1
Zm00001d034601	NAC	0.994306	1
Zm00001d038207	NAC	0.99444	1
Zm00001d042288	NAC	0.923329	1
Zm00001d003626	NAC	0.998941	1
Zm00001d047554	NAC	0.925471	1
Zm00001d048044	NAC	0.996963	1
Zm00001d012527	NAC	0.94155	1
Zm00001d013003	NAC	0.885375	1
Zm00001d036648	NF-YC	0.99678	1
Zm00001d015201	Nin-like	0.870804	1
Zm00001d043782	RAV	0.547755	1
Zm00001d011843	SRS	0.925498	1
Zm00001d051216	TCP	0.949676	1
Zm00001d051316	Trihelix	0.935178	1
Zm00001d028986	WOX	0.995954	1
Zm00001d044162	WRKY	0.561228	1
Zm00001d046805	WRKY	0.995399	1
Zm00001d007329	WRKY	0.904644	1
Zm00001d008793	WRKY	0.896826	1
Zm00001d010617	WRKY	0.894872	1
Zm00001d011413	WRKY	0.982186	1
Zm00001d041277	YABBY	0.988502	1
Zm00001d044662	ZF-HD	0.99698	1
Zm00001d052079	Zm_13	0.966709	1
Zm00001d027344	Zm_15	0.174512	1
Zm00001d012850	Zm_24	0.953763	1
Zm00001d003945	Zm_27	0.69145	1
Zm00001d025825	Zm_31	0.995838	1
Zm00001d038616	Zm_38	0.910501	1
Zm00001d036020	Zm_40	0.953972	1
Zm00001d032363	Zm_49	0.983059	1
Zm00001d044683	Zm_66	0.509466	1
Zm00001d054093	Zm_68	0.815654	1
Zm00001d039267	ARF	0.96818	2
Zm00001d007172	B3	0.784856	2
Zm00001d042263	bHLH	0.747113	2
Zm00001d047017	bHLH	0.921405	2
Zm00001d018178	bZIP	0.876727	2
Zm00001d028936	bZIP	0.993152	2
Zm00001d043992	bZIP	0.96583	2
Zm00001d007042	bZIP	0.94961	2
Zm00001d030858	C2H2	0.956063	2
Zm00001d034145	C2H2	0.897735	2
Zm00001d035701	C2H2	0.878198	2
Zm00001d038297	C2H2	0.851751	2
Zm00001d006682	C2H2	0.875957	2
Zm00001d023557	C2H2	0.803991	2
Zm00001d028139	C2H2	0.872872	2
Zm00001d023636	C3H	0.821436	2
Zm00001d024200	CO-like	0.912928	2
Zm00001d032999	Dof	0.723229	2
Zm00001d032295	ERF	0.935989	2
Zm00001d034920	ERF	0.69042	2
Zm00001d043205	ERF	0.941378	2
Zm00001d049364	ERF	0.913677	2
Zm00001d016616	ERF	0.83594	2
Zm00001d018305	ERF	0.709942	2
Zm00001d046981	G2-like	0.980421	2
Zm00001d012757	GATA	0.877237	2
Zm00001d048588	GRAS	0.753286	2
Zm00001d038225	GRAS	0.977836	2
Zm00001d002799	HD-ZIP	0.723177	2
Zm00001d025964	HD-ZIP	0.859799	2
Zm00001d005888	HSF	0.963798	2
Zm00001d016255	HSF	0.940232	2
Zm00001d020714	HSF	0.87522	2
Zm00001d052738	HSF	0.940665	2
Zm00001d047752	LBD	0.939704	2
Zm00001d021761	MYB	0.900266	2
Zm00001d030644	MYB	0.799792	2
Zm00001d039893	MYB	0.92931	2
Zm00001d040621	MYB	0.812437	2
Zm00001d041580	MYB	0.964895	2
Zm00001d017383	MYB	0.977462	2
Zm00001d051480	MYB_related	0.88966	2
Zm00001d002285	NAC	0.843363	2
Zm00001d021069	NAC	0.992948	2
Zm00001d022424	NAC	0.878803	2
Zm00001d023669	NAC	0.752269	2
Zm00001d034277	NAC	0.951834	2
Zm00001d038221	NAC	0.742277	2
Zm00001d041472	NAC	0.791425	2
Zm00001d042609	NAC	0.97589	2
Zm00001d050893	NAC	0.917403	2
Zm00001d008399	NAC	0.848128	2
Zm00001d011969	NAC	0.993598	2
Zm00001d013151	NAC	0.985595	2
Zm00001d007436	NF-YC	0.947882	2
Zm00001d052621	NF-YC	0.939212	2
Zm00001d038907	RAV	0.936727	2
Zm00001d017420	Trihelix	0.990883	2
Zm00001d038994	Trihelix	0.979762	2
Zm00001d043076	WOX	0.979445	2
Zm00001d002405	WRKY	0.983032	2
Zm00001d026252	WRKY	0.892296	2
Zm00001d028962	WRKY	0.856901	2
Zm00001d035323	WRKY	0.982341	2
Zm00001d038023	WRKY	0.92611	2
Zm00001d039245	WRKY	0.976715	2
Zm00001d041740	WRKY	0.824593	2
Zm00001d043950	WRKY	0.865021	2
Zm00001d006001	WRKY	0.819018	2
Zm00001d049173	WRKY	0.96196	2
Zm00001d052357	WRKY	0.98081	2
Zm00001d053369	WRKY	0.985524	2
Zm00001d008794	WRKY	0.986194	2
Zm00001d010399	WRKY	0.993762	2
Zm00001d017275	Zm_10	0.72233	2
Zm00001d017809	Zm_11	0.909741	2
Zm00001d008465	Zm_2	0.854417	2
Zm00001d013493	Zm_21	0.945118	2
Zm00001d008985	Zm_3	0.770443	2
Zm00001d025761	Zm_30	0.885084	2
Zm00001d026311	Zm_32	0.940088	2
Zm00001d037693	Zm_33	0.834934	2
Zm00001d038280	Zm_35	0.803197	2
Zm00001d038420	Zm_37	0.968456	2
Zm00001d044518	Zm_4	0.793368	2
Zm00001d014789	Zm_43	0.989127	2
Zm00001d024661	Zm_47	0.927098	2
Zm00001d049597	Zm_48	0.935422	2
Zm00001d032187	Zm_50	0.601302	2
Zm00001d005539	Zm_54	0.895222	2
Zm00001d006211	Zm_58	0.860394	2
Zm00001d049273	Zm_65	0.862029	2
Zm00001d012561	Zm_7	0.963324	2
Zm00001d010987	AP2	0.857825	3
Zm00001d046621	AP2	0.811509	3
Zm00001d001879	ARF	0.974651	3
Zm00001d051172	ARF	0.781907	3
Zm00001d003601	ARF	0.994404	3
Zm00001d011953	ARF	0.975099	3
Zm00001d012731	ARF	0.973123	3
Zm00001d023659	ARF	0.977793	3
Zm00001d043431	ARF	0.981021	3
Zm00001d049295	ARF	0.982949	3
Zm00001d004102	ARR-B	0.744192	3
Zm00001d038504	B3	0.826813	3
Zm00001d006065	bHLH	0.96147	3
Zm00001d037098	bHLH	0.988278	3
Zm00001d042482	bHLH	0.655498	3
Zm00001d044242	bHLH	0.923272	3
Zm00001d048309	bHLH	0.717175	3
Zm00001d051569	bHLH	0.831459	3
Zm00001d052038	bHLH	0.903396	3
Zm00001d012067	bHLH	0.950951	3
Zm00001d013073	bHLH	0.959607	3
Zm00001d016873	bHLH	0.913495	3
Zm00001d018967	bHLH	0.998103	3
Zm00001d024783	bHLH	0.983469	3
Zm00001d018571	bZIP	0.899353	3
Zm00001d030995	bZIP	0.947903	3
Zm00001d038189	bZIP	0.998405	3
Zm00001d005578	bZIP	0.920515	3
Zm00001d043117	bZIP	0.918875	3
Zm00001d046402	bZIP	0.939332	3
Zm00001d046718	bZIP	0.827045	3
Zm00001d053988	bZIP	0.981442	3
Zm00001d015153	bZIP	0.97452	3
Zm00001d015743	bZIP	0.976317	3
Zm00001d032922	C2H2	0.903655	3
Zm00001d044261	C2H2	0.948114	3
Zm00001d051865	C2H2	0.705642	3
Zm00001d010842	C2H2	0.838599	3
Zm00001d021403	C2H2	0.978991	3
Zm00001d023788	C2H2	0.99436	3
Zm00001d003616	C3H	0.757697	3
Zm00001d021945	C3H	0.808494	3
Zm00001d003162	CO-like	0.867048	3
Zm00001d051684	CO-like	0.854032	3
Zm00001d025770	CO-like	0.957624	3
Zm00001d037327	CO-like	0.996557	3
Zm00001d045661	CO-like	0.972472	3
Zm00001d046925	CO-like	0.991921	3
Zm00001d017412	DBB	0.862493	3
Zm00001d021278	DBB	0.87723	3
Zm00001d051439	Dof	0.754749	3
Zm00001d029884	ERF	0.972344	3
Zm00001d039077	ERF	0.799152	3
Zm00001d052229	ERF	0.969017	3
Zm00001d008545	ERF	0.991923	3
Zm00001d012585	ERF	0.998683	3
Zm00001d020595	ERF	0.768506	3
Zm00001d049493	FAR1	0.988765	3
Zm00001d039260	G2-like	0.838461	3
Zm00001d044785	G2-like	0.984566	3
Zm00001d050404	G2-like	0.935931	3
Zm00001d018698	G2-like	0.825594	3
Zm00001d023402	G2-like	0.717732	3
Zm00001d023411	G2-like	0.704003	3
Zm00001d026542	G2-like	0.895415	3
Zm00001d030891	G2-like	0.397385	3
Zm00001d038191	G2-like	0.94062	3
Zm00001d011771	GATA	0.830458	3
Zm00001d046354	GATA	0.873406	3
Zm00001d006701	GRAS	0.426697	3
Zm00001d021946	GRAS	0.956531	3
Zm00001d026158	GRAS	0.930026	3
Zm00001d027292	GRAS	0.997991	3
Zm00001d026240	GRF	0.842101	3
Zm00001d029736	HB-other	0.959508	3
Zm00001d033246	HB-other	0.881173	3
Zm00001d041489	HD-ZIP	0.810992	3
Zm00001d005692	HD-ZIP	0.829337	3
Zm00001d005951	HD-ZIP	0.992293	3
Zm00001d020804	HD-ZIP	0.989998	3
Zm00001d021236	HD-ZIP	0.958838	3
Zm00001d027852	HD-ZIP	0.974799	3
Zm00001d027991	HD-ZIP	0.989238	3
Zm00001d018941	HSF	0.890468	3
Zm00001d027757	HSF	0.995404	3
Zm00001d049525	LSD	0.694468	3
Zm00001d042315	M-type_MADS	0.986391	3
Zm00001d030678	MYB	0.840316	3
Zm00001d032024	MYB	0.919712	3
Zm00001d035604	MYB	0.996985	3
Zm00001d040527	MYB	0.865268	3
Zm00001d042830	MYB	0.946453	3
Zm00001d047671	MYB	0.662476	3
Zm00001d048623	MYB	0.915686	3
Zm00001d053060	MYB	0.759516	3
Zm00001d008602	MYB	0.98931	3
Zm00001d012337	MYB	0.989012	3
Zm00001d016000	MYB	0.927257	3
Zm00001d008808	MYB_related	0.868172	3
Zm00001d044409	MYB_related	0.988446	3
Zm00001d051458	MYB_related	0.945757	3
Zm00001d014863	MYB_related	0.911561	3
Zm00001d024547	MYB_related	0.846338	3
Zm00001d031454	MYB_related	0.775314	3
Zm00001d018435	NAC	0.229678	3
Zm00001d024268	NAC	0.817641	3
Zm00001d031655	NAC	0.982892	3
Zm00001d045463	NAC	0.55741	3
Zm00001d014405	NAC	0.731109	3
Zm00001d027874	NF-YA	0.979966	3
Zm00001d033602	NF-YA	0.706945	3
Zm00001d021442	Nin-like	0.958726	3
Zm00001d014698	SBP	0.860291	3
Zm00001d015233	SBP	0.994314	3
Zm00001d040571	SBP	0.996181	3
Zm00001d013547	TALE	0.904517	3
Zm00001d033898	TALE	0.997953	3
Zm00001d035907	TALE	0.998831	3
Zm00001d018530	TCP	0.962706	3
Zm00001d038683	TCP	0.959316	3
Zm00001d040554	WRKY	0.833923	3
Zm00001d009698	WRKY	0.4565	3
Zm00001d032175	ZF-HD	0.831483	3
Zm00001d018030	Zm_12	0.889519	3
Zm00001d018470	Zm_14	0.894919	3
Zm00001d027488	Zm_16	0.871364	3
Zm00001d045455	Zm_17	0.849369	3
Zm00001d047972	Zm_18	0.754982	3
Zm00001d029061	Zm_19	0.998799	3
Zm00001d033985	Zm_22	0.948038	3
Zm00001d034828	Zm_23	0.825621	3
Zm00001d034851	Zm_25	0.740968	3
Zm00001d042840	Zm_26	0.74947	3
Zm00001d010204	Zm_34	0.857311	3
Zm00001d010066	Zm_36	0.969804	3
Zm00001d046112	Zm_42	0.993884	3
Zm00001d018797	Zm_44	0.96425	3
Zm00001d021655	Zm_45	0.766519	3
Zm00001d001860	Zm_51	0.84306	3
Zm00001d031449	Zm_52	0.747097	3
Zm00001d019988	Zm_53	0.713597	3
Zm00001d020557	Zm_55	0.949277	3
Zm00001d020609	Zm_56	0.927503	3
Zm00001d032789	Zm_59	0.88166	3
Zm00001d043538	Zm_6	0.930807	3
Zm00001d013915	Zm_60	0.553769	3
Zm00001d023699	Zm_61	0.920867	3
Zm00001d049657	Zm_62	0.938471	3
Zm00001d048688	Zm_63	0.979075	3
Zm00001d049239	Zm_64	0.804502	3
Zm00001d035212	Zm_67	0.898069	3
Zm00001d023888	Zm_69	0.926833	3
Zm00001d013845	Zm_9	0.923132	3
Zm00001d034629	AP2	0.553396	4
Zm00001d039006	ARF	0.964652	4
Zm00001d012128	ARR-B	0.771701	4
Zm00001d042463	ARR-B	0.995301	4
Zm00001d004358	B3	0.857574	4
Zm00001d034965	B3	0.884804	4
Zm00001d034298	bHLH	0.874021	4
Zm00001d008205	bHLH	0.899241	4
Zm00001d022442	bZIP	0.910396	4
Zm00001d031697	bZIP	0.897196	4
Zm00001d038296	bZIP	0.890901	4
Zm00001d053967	bZIP	0.655758	4
Zm00001d012719	bZIP	0.942046	4
Zm00001d015118	bZIP	0.891013	4
Zm00001d005837	C2H2	0.951355	4
Zm00001d028371	C2H2	0.874389	4
Zm00001d036297	C2H2	0.889012	4
Zm00001d026536	C3H	0.716104	4
Zm00001d042363	C3H	0.732971	4
Zm00001d013443	CO-like	0.715839	4
Zm00001d033719	CO-like	0.76671	4
Zm00001d017147	DBB	0.872274	4
Zm00001d017176	DBB	0.716897	4
Zm00001d051018	DBB	0.639608	4
Zm00001d017575	Dof	0.997411	4
Zm00001d028625	Dof	0.826042	4
Zm00001d026486	ERF	0.916942	4
Zm00001d039989	ERF	0.896797	4
Zm00001d051451	ERF	0.858389	4
Zm00001d002649	G2-like	0.903387	4
Zm00001d009193	GATA	0.672779	4
Zm00001d016361	GATA	0.963246	4
Zm00001d040254	GeBP	0.920848	4
Zm00001d003553	GRAS	0.980171	4
Zm00001d029607	GRAS	0.875073	4
Zm00001d030500	GRAS	0.808217	4
Zm00001d033834	GRAS	0.901702	4
Zm00001d040090	HD-ZIP	0.856733	4
Zm00001d051749	HD-ZIP	0.90769	4
Zm00001d035195	LSD	0.91581	4
Zm00001d039913	M-type_MADS	0.886992	4
Zm00001d020569	MYB	0.717321	4
Zm00001d018097	MYB	0.971113	4
Zm00001d011297	MYB_related	0.891189	4
Zm00001d017507	MYB_related	0.866927	4
Zm00001d017782	MYB_related	0.740583	4
Zm00001d002934	NAC	0.875717	4
Zm00001d022099	NF-YB	0.804473	4
Zm00001d028432	NF-YC	0.908612	4
Zm00001d052838	NF-YC	0.952058	4
Zm00001d006028	SBP	0.933763	4
Zm00001d046223	TALE	0.956168	4
Zm00001d012725	TCP	0.941951	4
Zm00001d018045	TCP	0.759797	4
Zm00001d025896	TCP	0.86086	4
Zm00001d037221	TCP	0.756506	4
Zm00001d039371	TCP	0.986907	4
Zm00001d044836	TCP	0.799915	4
Zm00001d015605	Trihelix	0.971817	4
Zm00001d054080	Trihelix	0.773858	4
Zm00001d036148	Whirly	0.84786	4
Zm00001d008612	WOX	0.995817	4
Zm00001d047574	WRKY	0.87416	4
Zm00001d050022	WRKY	0.989349	4
Zm00001d052847	WRKY	0.644844	4
Zm00001d039116	ZF-HD	0.938164	4
Zm00001d041780	ZF-HD	0.918598	4
Zm00001d050443	ZF-HD	0.958123	4
Zm00001d008440	Zm_1	0.746059	4
Zm00001d006592	Zm_20	0.831703	4
Zm00001d003767	Zm_28	0.893505	4
Zm00001d003429	Zm_29	0.875112	4
Zm00001d011138	Zm_39	0.944128	4
Zm00001d045965	Zm_41	0.842581	4
Zm00001d035001	Zm_46	0.994719	4
Zm00001d011454	Zm_5	0.917202	4
Zm00001d005807	Zm_57	0.977204	4
Zm00001d014919	Zm_8	0.963262	4
