# Supplementary material for: A Comparative Transcriptomic Meta-Analysis Revealed Conserved Key Genes and Regulatory Networks Involved in Drought Tolerance in Cereal Crops
Source: Int J Mol Sci. 2021 Dec 2;22(23):13062. doi: 10.3390/ijms222313062 (PMC8657901; doi:10.3390/ijms222313062)
Supplement: Supplementary file 1 [file ijms-22-13062-s001.zip › Supplementary_File_S5.xlsx]

## Sheet: B. distachyon
Gene ID	TF class	score	Cluster	class
BRADI3g59300	AP2	0.983677	1	sen+
BRADI5g24100	AP2	0.99898	1	sen+
BRADI1g34340	ARF	0.549091	1	tol-
BRADI5g15904	ARF	0.971778	1	sen+
BRADI4g38630	BES1	0.93986	1	sen+
BRADI1g46700	bHLH	0.871919	1	sen+
BRADI1g61110	bHLH	0.987355	1	sen+
BRADI2g00730	bHLH	0.962992	1	sen+
BRADI2g00740	bHLH	0.987222	1	sen+
BRADI2g36740	bHLH	0.987471	1	sen+
BRADI3g38970	bHLH	0.989924	1	sen+
BRADI3g45360	bHLH	0.910478	1	sen+
BRADI3g46200	bHLH	0.998087	1	sen+
BRADI1g09177	bHLH	0.765905	1	sen+
BRADI3g58360	bHLH	0.996197	1	sen+
BRADI4g14190	bHLH	0.76921	1	tol+
BRADI5g01900	bHLH	0.992366	1	sen+
BRADI5g22920	bHLH	0.852402	1	sen+
BRADI1g25230	bHLH	0.982985	1	sen+
BRADI1g35990	bHLH	0.998031	1	sen+
BRADI1g04510	bZIP	0.996197	1	sen+
BRADI1g68560	bZIP	0.93972	1	sen+
BRADI2g15940	bZIP	0.988503	1	sen+
BRADI2g24120	bZIP	0.932993	1	sen+
BRADI2g25400	bZIP	0.957137	1	sen+
BRADI2g40582	bZIP	0.986962	1	sen+
BRADI2g45567	bZIP	0.990361	1	sen+
BRADI2g53060	bZIP	0.99891	1	sen+
BRADI2g56096	bZIP	0.998044	1	sen+
BRADI3g15590	bZIP	0.999984	1	sen+
BRADI3g38200	bZIP	0.968965	1	sen+
BRADI3g57960	bZIP	0.9987	1	sen+
BRADI4g04720	bZIP	0.998029	1	sen+
BRADI1g07310	bZIP	0.990323	1	sen+
BRADI4g42120	bZIP	0.996197	1	sen+
BRADI1g30750	bZIP	0.9987	1	sen+
BRADI1g46060	bZIP	0.979927	1	sen+
BRADI3g01483	C2H2	0.999934	1	sen+
BRADI1g71330	C2H2	0.989034	1	sen+
BRADI2g14120	C2H2	0.985531	1	sen+
BRADI2g41550	C2H2	0.985297	1	sen+
BRADI2g58261	C2H2	0.881048	1	sen+
BRADI2g58720	C2H2	0.661916	1	sen+
BRADI1g11760	C3H	0.898653	1	sen+
BRADI2g05750	C3H	0.967415	1	sen+
BRADI2g33270	C3H	0.99914	1	sen+
BRADI2g54220	C3H	0.97368	1	sen+
BRADI5g02300	C3H	0.959495	1	sen+
BRADI3g19010	CO-like	0.970375	1	sen+
BRADI1g55710	CPP	0.98767	1	sen+
BRADI3g34670	CPP	0.913404	1	sen+
BRADI4g02410	CPP	0.999675	1	sen+
BRADI1g35030	DBB	0.999775	1	sen+
BRADI2g06370	DBB	0.987997	1	sen+
BRADI4g33000	Dof	0.989022	1	sen+
BRADI1g45470	ERF	0.949285	1	sen+
BRADI2g31480	ERF	0.976176	1	sen+
BRADI3g06562	ERF	0.876119	1	sen+
BRADI3g08790	ERF	0.994986	1	sen+
BRADI3g31600	ERF	0.979907	1	sen+
BRADI3g35560	ERF	0.563854	1	sen+
BRADI3g41543	ERF	0.992149	1	sen+
BRADI3g41547	ERF	0.88024	1	sen+
BRADI1g46690	ERF	0.982529	1	sen+
BRADI3g50508	ERF	0.996197	1	sen+
BRADI4g27850	ERF	0.944465	1	sen+
BRADI4g29010	ERF	0.986601	1	sen+
BRADI5g08380	ERF	0.914032	1	sen+
BRADI5g17640	ERF	0.906112	1	sen+
BRADI1g48320	ERF	0.989638	1	sen+
BRADI1g54450	ERF	0.996197	1	sen+
BRADI2g06180	ERF	0.986284	1	sen+
BRADI2g29960	ERF	0.982363	1	sen+
BRADI1g13310	FAR1	0.936236	1	sen+
BRADI4g15566	FAR1	0.91353	1	sen+
BRADI4g00925	FAR1	0.832043	1	sen+
BRADI5g20520	G2-like	0.988836	1	sen+
BRADI1g58830	G2-like	0.864856	1	sen+
BRADI1g03020	GATA	0.958456	1	sen+
BRADI2g62660	GATA	0.955784	1	sen+
BRADI3g03800	GATA	0.94313	1	sen+
BRADI3g08240	GATA	0.834435	1	sen+
BRADI3g54720	GATA	0.974618	1	sen+
BRADI4g09196	GRAS	0.960683	1	sen+
BRADI5g19190	GRAS	0.963634	1	sen+
BRADI1g50597	GRF	0.993848	1	sen+
BRADI5g20607	GRF	0.954023	1	sen+
BRADI4g03303	HB-other	0.889144	1	sen+
BRADI1g13910	HD-ZIP	0.953212	1	sen+
BRADI4g35910	HD-ZIP	0.970151	1	sen+
BRADI5g17170	HD-ZIP	0.998921	1	sen+
BRADI1g71280	HD-ZIP	0.995326	1	sen+
BRADI3g21480	HD-ZIP	0.976261	1	sen+
BRADI3g35850	HD-ZIP	0.92206	1	sen+
BRADI3g38600	HD-ZIP	0.963588	1	sen+
BRADI3g46320	HD-ZIP	0.973378	1	sen+
BRADI3g50220	HD-ZIP	0.998433	1	sen+
BRADI4g29380	HD-ZIP	0.92002	1	sen+
BRADI1g38140	HSF	0.902776	1	sen+
BRADI2g41530	HSF	0.998261	1	sen+
BRADI2g48990	HSF	0.973272	1	sen+
BRADI3g08870	HSF	0.998667	1	sen+
BRADI3g26920	HSF	0.783845	1
BRADI3g42130	HSF	0.992398	1	sen+
BRADI4g32130	HSF	0.793722	1	sen+
BRADI4g35780	HSF	0.982091	1	sen+
BRADI2g53690	LBD	0.923411	1	sen+
BRADI1g72150	MIKC_MADS	0.906761	1	sen+
BRADI3g32090	MIKC_MADS	0.638614	1	sen-
BRADI5g21700	MIKC_MADS	0.996197	1	sen+
BRADI2g59119	M-type_MADS	0.622876	1	sen-
BRADI2g46770	MYB	0.990499	1	sen+
BRADI3g28830	MYB	0.990738	1	sen+
BRADI3g36740	MYB	0.994589	1	sen+
BRADI3g48886	MYB	0.992324	1	sen+
BRADI3g56917	MYB	0.954341	1	sen+
BRADI4g03970	MYB	0.9172	1	sen+
BRADI4g08220	MYB	0.96946	1	sen+
BRADI4g23967	MYB	0.951227	1	sen+
BRADI1g64687	MYB	0.97863	1	sen+
BRADI5g20130	MYB	0.718358	1	sen+
BRADI2g01960	MYB	0.996197	1	sen+
BRADI2g11080	MYB	0.722537	1	sen+
BRADI2g17982	MYB	0.993081	1	sen+
BRADI5g07300	MYB_related	0.943665	1	sen+
BRADI5g19380	MYB_related	0.967162	1	sen+
BRADI2g02810	MYB_related	0.998593	1	sen+
BRADI2g05590	MYB_related	0.991684	1	sen+
BRADI2g05760	MYB_related	0.970426	1	sen+
BRADI1g04150	NAC	0.669782	1	sen+
BRADI2g33307	NAC	0.91231	1	sen+
BRADI3g16480	NAC	0.973862	1	sen+
BRADI3g33957	NAC	0.96999	1	sen+
BRADI3g54817	NAC	0.939575	1	sen+
BRADI4g02060	NAC	0.997959	1	sen+
BRADI4g03620	NAC	0.846964	1	sen+
BRADI4g23640	NAC	0.965964	1	sen+
BRADI4g40880	NAC	0.982539	1	sen+
BRADI4g44000	NAC	0.99433	1	sen+
BRADI5g15587	NAC	0.995371	1	sen+
BRADI1g17440	NAC	0.975842	1	sen+
BRADI1g17480	NAC	0.958075	1	S+/T-
BRADI1g50057	NAC	0.986204	1	sen+
BRADI1g63600	NAC	0.99311	1	sen+
BRADI2g24987	NAC	0.99869	1	sen+
BRADI2g28020	NAC	0.54994	1	sen+
BRADI1g13680	NF-YA	0.980963	1	sen+
BRADI1g21762	NF-YA	0.896602	1	sen+
BRADI1g72960	NF-YA	0.990548	1	sen+
BRADI2g22940	NF-YB	0.962329	1	sen+
BRADI2g08600	Nin-like	0.999988	1	sen+
BRADI5g09140	S1Fa-like	0.993247	1	sen+
BRADI2g59110	SBP	0.984246	1	sen+
BRADI2g54940	TALE	0.946431	1	sen+
BRADI3g26690	TALE	0.917013	1	sen+
BRADI2g06890	TCP	0.962049	1	sen+
BRADI3g59320	TCP	0.661757	1	sen+
BRADI3g00697	Trihelix	0.923721	1	sen+
BRADI3g30457	Trihelix	0.994764	1	sen+
BRADI4g37730	Trihelix	0.995652	1	sen+
BRADI5g17150	Trihelix	0.799143	1	sen+
BRADI3g04450	Whirly	0.965904	1	sen+
BRADI2g54720	WRKY	0.993564	1	sen+
BRADI1g09170	WRKY	0.808248	1	sen+
BRADI1g63910	WRKY	0.995863	1	sen+
BRADI2g08620	WRKY	0.986031	1	sen+
BRADI3g36820	AP2	0.940483	2	sen-
BRADI2g50120	ARF	0.871014	2	sen-
BRADI5g10950	ARF	0.977268	2	sen-
BRADI1g47400	ARR-B	0.983965	2	sen-
BRADI3g06120	ARR-B	0.702141	2	sen-
BRADI1g05430	bHLH	0.988986	2	sen-
BRADI2g20720	bHLH	0.981898	2	sen-
BRADI2g60970	bHLH	0.847757	2	ΔLFC>1
BRADI1g06670	bHLH	0.906946	2	sen-
BRADI3g33170	bHLH	0.998329	2	sen-
BRADI3g39927	bHLH	0.994369	2	sen-
BRADI3g48070	bHLH	0.974618	2	sen-
BRADI3g52790	bHLH	0.988221	2	sen-
BRADI1g10170	bHLH	0.959651	2	sen-
BRADI1g13980	bHLH	0.990634	2	sen-
BRADI1g63840	bZIP	0.955242	2	sen-
BRADI2g52590	bZIP	0.951599	2	sen-
BRADI1g05480	bZIP	0.978704	2	sen-
BRADI2g55567	bZIP	0.962579	2	sen-
BRADI3g02730	bZIP	0.973156	2	sen-
BRADI3g02980	bZIP	0.866763	2	sen-
BRADI3g07540	bZIP	0.966399	2	sen-
BRADI4g02570	bZIP	0.953606	2	sen-
BRADI1g30140	bZIP	0.755322	2	sen-
BRADI1g43900	bZIP	0.908426	2	sen-
BRADI1g23470	C2H2	0.98981	2	sen-
BRADI1g68570	C2H2	0.991932	2	sen-
BRADI2g58770	C3H	0.935634	2	sen-
BRADI4g08050	C3H	0.980539	2	sen-
BRADI4g19010	C3H	0.958415	2	sen-
BRADI1g11310	CO-like	0.830497	2	sen-
BRADI1g31280	CO-like	0.988179	2	sen-
BRADI1g43990	CO-like	0.953787	2	sen-
BRADI3g05800	CO-like	0.925129	2	sen-
BRADI3g48447	CO-like	0.818923	2	sen-
BRADI5g14600	CO-like	0.991996	2	sen-
BRADI4g35950	DBB	0.940245	2	sen-
BRADI5g14280	DBB	0.994453	2	sen-
BRADI5g17080	DBB	0.997021	2	sen-
BRADI2g09720	Dof	0.963805	2	sen-
BRADI3g25670	Dof	0.982539	2	sen-
BRADI5g18640	Dof	0.889648	2	sen-
BRADI2g60340	ERF	0.896369	2	sen-
BRADI5g17480	ERF	0.858939	2	sen-
BRADI1g72457	ERF	0.916606	2	sen-
BRADI4g40020	FAR1	0.946494	2	sen-
BRADI1g19740	FAR1	0.976648	2	sen-
BRADI1g67740	FAR1	0.942526	2	sen-
BRADI3g09160	G2-like	0.899092	2	sen-
BRADI3g52320	G2-like	0.955378	2	sen-
BRADI4g27607	G2-like	0.971651	2	sen-
BRADI1g34470	G2-like	0.97471	2	sen-
BRADI5g17370	GATA	0.93063	2	sen-
BRADI1g23350	GRAS	0.898787	2	sen-
BRADI3g16400	LSD	0.967006	2	S-/T+
BRADI4g06867	MIKC_MADS	0.946494	2	sen-
BRADI3g42350	MYB	0.941164	2	sen-
BRADI4g04050	MYB	0.904702	2	sen-
BRADI2g23310	MYB	0.945451	2	sen-
BRADI2g23341	MYB	0.736999	2	sen-
BRADI2g24400	MYB	0.850795	2	sen-
BRADI1g29680	MYB_related	0.937589	2	sen-
BRADI3g14830	MYB_related	0.9705	2	sen-
BRADI3g16515	MYB_related	0.951663	2	sen-
BRADI3g33440	MYB_related	0.814427	2	sen-
BRADI3g51757	MYB_related	0.980566	2	sen-
BRADI3g52807	MYB_related	0.959644	2	sen-
BRADI2g13860	MYB_related	0.998512	2	sen-
BRADI2g16120	MYB_related	0.90397	2	sen-
BRADI2g42870	MYB_related	0.985909	2	sen-
BRADI2g44520	MYB_related	0.993877	2	sen-
BRADI2g53260	NAC	0.952158	2	sen-
BRADI2g55780	NAC	0.938814	2	sen-
BRADI3g13630	NAC	0.986277	2	sen-
BRADI3g13727	NAC	0.905212	2	sen-
BRADI3g41470	NAC	0.961914	2	sen-
BRADI2g25150	NAC	0.977315	2	sen-
BRADI1g21900	NF-YB	0.989748	2	sen-
BRADI1g60030	NF-YB	0.957987	2	S-/T+
BRADI1g67980	NF-YC	0.98454	2	sen-
BRADI4g37147	Nin-like	0.889867	2	sen-
BRADI1g09615	TALE	0.98679	2	sen-
BRADI1g30730	TALE	0.938503	2	sen-
BRADI1g51980	TALE	0.943861	2	sen-
BRADI2g59240	TCP	0.87486	2	sen-
BRADI4g41430	TCP	0.836473	2	sen-
BRADI3g44370	Trihelix	0.978279	2	sen-
BRADI5g08600	Trihelix	0.9965	2	sen-
BRADI2g45480	WRKY	0.856498	2	sen-
BRADI3g09810	WRKY	0.840563	2	sen-
BRADI3g34567	WRKY	0.927241	2	sen-
BRADI1g59180	WRKY	0.92735	2	sen-
BRADI2g44035	WRKY	0.97435	2	sen-
BRADI2g44540	ZF-HD	0.998754	2	sen-
BRADI3g37040	ZF-HD	0.90176	2	sen-
BRADI4g21160	ZF-HD	0.969912	2	sen-
BRADI4g30240	ZF-HD	0.965631	2	sen-
BRADI4g32580	ZF-HD	0.987218	2	sen-
BRADI4g40270	ZF-HD	0.900638	2	sen-

## Sheet: H. vulgare
Gene ID	TF class	score	Cluster	class
HORVU1Hr1G056500	AP2	0.524205	1	tol+
HORVU3Hr1G097200	ARF	0.993887	1	tol+
HORVU6Hr1G020330	ARF	0.985156	1	tol+
HORVU7Hr1G030000	ARR-B	0.976663	1	tol+
HORVU7Hr1G030050	ARR-B	0.997391	1	tol+
HORVU1Hr1G007010	B3	0.98636	1	tol+
HORVU4Hr1G084850	bHLH	0.93456	1	tol+
HORVU3Hr1G000170	bHLH	0.859558	1	sen+
HORVU5Hr1G103280	C3H	0.996012	1	tol+
HORVU2Hr1G092460	DBB	0.849223	1	tol+
HORVU7Hr1G032750	ERF	0.807374	1
HORVU5Hr1G018220	G2-like	0.975278	1	tol+
HORVU5Hr1G097560	G2-like	0.924398	1	tol+
HORVU2Hr1G021950	HB-other	0.924554	1	tol+
HORVU3Hr1G020400	HB-other	0.986431	1	tol+
HORVU2Hr1G092710	HD-ZIP	0.976609	1	tol+
HORVU2Hr1G097940	HD-ZIP	0.872634	1	sen+
HORVU4Hr1G070610	HD-ZIP	0.431423	1	tol+
HORVU5Hr1G059410	HD-ZIP	0.983774	1
HORVU5Hr1G081090	HD-ZIP	0.942118	1
HORVU6Hr1G061390	HD-ZIP	0.930993	1	tol+
HORVU3Hr1G069590	HSF	0.908237	1	sen+
HORVU3Hr1G021310	MYB_related	0.609236	1	tol+
HORVU1Hr1G063740	NAC	0.89626	1	sen+
HORVU6Hr1G019380	NAC	0.930556	1	tol+
HORVU7Hr1G072670	NAC	0.762627	1	tol+
HORVU5Hr1G099390	NAC	0.854326	1	sen+
HORVU2Hr1G039640	NAC	0.913136	1	tol+
HORVU4Hr1G051360	NAC	0.800678	1	tol+
HORVU5Hr1G011650	NAC	0.682735	1	tol+
HORVU1Hr1G071620	NF-YB	0.993878	1
HORVU5Hr1G122180	B3	0.334194	2	sen-
HORVU6Hr1G054050	B3	0.870141	2	sen-
HORVU5Hr1G073170	bHLH	0.986462	2	tol-
HORVU5Hr1G106120	bZIP	0.668922	2	tol-
HORVU5Hr1G081190	DBB	0.997221	2
HORVU6Hr1G028150	DBB	0.894026	2	tol-
HORVU6Hr1G073040	MIKC_MADS	0.430658	2	tol+
HORVU4Hr1G054420	MYB	0.809389	2	tol-
HORVU1Hr1G089460	MYB_related	0.928024	2
HORVU7Hr1G070870	MYB_related	0.951911	2
HORVU7Hr1G121210	MYB_related	0.960752	2
HORVU1Hr1G089490	MYB_related	0.960124	2	tol-
HORVU1Hr1G089500	MYB_related	0.98676	2	tol-
HORVU1Hr1G089570	MYB_related	0.96436	2	tol-
HORVU1Hr1G091520	MYB_related	0.943561	2	ΔLFC>1
HORVU1Hr1G091540	MYB_related	0.907556	2
HORVU3Hr1G052710	MYB_related	0.908781	2	tol-
HORVU3Hr1G090440	NAC	0.964897	2	tol-
HORVU2Hr1G048280	SBP	0.98449	2	tol-
HORVU7Hr1G114650	TALE	0.981444	2	tol-

## Sheet: O. sativa
Gene ID	TF class	score	Cluster	class	TF genes in the independent GCN	PsaO r correlation in GCN	SGR r correlation in GCN
Os01g0158900	NF-X1	0.939173	2		X	n.s.	n.s.
Os01g0202500	DBB	0.887699	2		X	n.s.	n.s.
Os01g0663051	MYB_related	0.848544	2	tol-	X	n.s.	n.s.
Os01g0813100	bZIP	0.961862	2	tol-	X	0.926459	-0.902959
Os01g0952800	bHLH	0.909384	2	sen-	X	0.956054	-0.961021
Os01g0975300	MYB_related	0.981417	2		X	n.s.	n.s.
Os02g0128200	bZIP	0.979719	2	tol-	X	0.97927	-0.955209
Os02g0539600	Trihelix	0.974798	2	tol-	X	n.s.	n.s.
Os02g0603600	bHLH	0.887008	2	tol-	X	0.906362	n.s.
Os03g0120900	B3	0.91155	2		X	n.s.	n.s.
Os03g0169600	Dof	0.707202	2	sen-	not present	-	-
Os03g0193000	GRAS	0.701076	2	sen-	X	n.s.	n.s.
Os03g0251350	NF-YC	0.894212	2		X	0.983943	-0.952236
Os03g0327800	NAC	0.201357	2	tol+	X	-0.988908	0.996238
Os03g0413000	NF-YB	0.800124	2	tol-	X	0.996545	-0.975906
Os03g0657400	WRKY	0.843535	2	tol-	not present	-	-
Os03g0769800	HB-other	0.955165	2	tol-	X	n.s.	n.s.
Os03g0782500	bHLH	0.947828	2	tol-	X	0.987125	-0.967687
Os05g0114700	MYB	0.47178	2	sen+	not present	-	-
Os05g0121600	AP2	0.783979	2	sen-	X	0.940921	n.s.
Os05g0155400	GATA	0.940754	2	tol-	X	n.s.	n.s.
Os05g0474800	WRKY	0.905585	2	tol-	X	-0.924457	n.s.
Os05g0567600	MYB_related	0.814559	2	tol-	X	n.s.	n.s.
Os06g0131700	NAC	0.331758	2	tol+	not present	-	-
Os06g0145800	Whirly	0.820436	2	tol-	X	0.942294	-0.908908
Os06g0146250	WRKY	0.731975	2	sen-	X	n.s.	n.s.
Os08g0159500	LBD	0.911991	2		X	0.983282	-0.988872
Os08g0357300	bZIP	0.871127	2	tol-	X	-0.951957	0.917256
Os09g0287000	ERF	0.908361	2		not present	-	-
Os09g0306400	bZIP	0.882854	2		X	n.s.	n.s.
Os09g0434500	ERF	0.993514	2	tol-	X	n.s.	n.s.
Os10g0463400	G2-like	0.716277	2	tol-	not present	-	-
Os11g0151002	FAR1	0.92271	2	tol-	X	0.954158	-0.974991
Os12g0601800	bZIP	0.744086	2		X	0.977906	-0.970084
Os12g0610600	NAC	0.68451	2	tol+	X	n.s.	0.918549
Os01g0105700	bHLH	0.904539	3	sen+	X	n.s.	n.s.
Os01g0108400	bHLH	0.773004	3	sen+	X	n.s.	n.s.
Os01g0159800	bHLH	0.938357	3	sen+	X	-0.960359	0.971636
Os01g0174000	bZIP	0.991127	3	sen+	not present	-	-
Os01g0239000	G2-like	0.931752	3	sen+	X	n.s.	n.s.
Os01g0305900	MYB	0.958497	3	sen+	not present	-	-
Os01g0797600	ERF	0.936668	3		X	-0.984196	0.970144
Os01g0863300	MYB	0.971967	3	sen+	X	-0.988743	0.991072
Os01g0867300	bZIP	0.987365	3	sen+	X	-0.976901	0.992744
Os01g0948200	GRAS	0.968617	3	sen+	X	-0.934277	0.930865
Os02g0174300	Trihelix	0.846881	3	sen+	X	n.s.	n.s.
Os02g0606200	DBB	0.948762	3	sen+	X	0.953612	-0.915569
Os03g0161900	HSF	0.850074	3	sen+	X	0.982935	-0.970843
Os03g0609500	LBD	0.995036	3	sen+	X	0.910767
Os03g0711100	CO-like	0.946442	3	sen+	X	0.948543	-0.905396
Os03g0764600	G2-like	0.860933	3	sen+	X	-0.931237	0.945945
Os03g0797600	bHLH	0.941116	3	sen+	X	0.908987	n.s.
Os03g0815800	ERF	0.990391	3	sen+	not present	-	-
Os04g0497700	CO-like	0.950289	3	sen+	X	n.s.	n.s.
Os04g0548700	HD-ZIP	0.996733	3	sen+	X	n.s.	n.s.
Os04g0569100	HD-ZIP	0.724794	3	tol+	not present	-	-
Os04g0669200	ERF	0.992661	3	sen+	X	-0.95261	0.968382
Os05g0128200	C3H	0.991612	3	sen+	not present	-	-
Os05g0411300	bZIP	0.945188	3	sen+	X	-0.96207	0.987529
Os05g0513100	TCP	0.992252	3	sen+	X	n.s.	n.s.
Os05g0536250	AP2	0.878157	3	sen+	X	n.s.	n.s.
Os05g0572000	ERF	0.962561	3	sen+	X	-0.979334	0.985147
Os05g0579300	ZF-HD	0.845218	3	sen+	X	0.989585	-0.960037
Os05g0583000	WRKY	0.906531	3		X	-0.955812	0.973622
Os06g0654900	CO-like	0.956637	3	sen+	X	n.s.	n.s.
Os06g0713000	DBB	0.928591	3		not present	-	-
Os07g0432800	MYB	0.516085	3	sen-	not present	-	-
Os07g0508700	Dof	0.932631	3	sen+	not present	-	-
Os07g0644100	bZIP	0.992587	3	sen+	X	-0.980236	0.995643
Os07g0684800	NAC	0.912398	3	sen+	X	-0.943121	0.975693
Os08g0408500	ERF	0.970655	3	sen+	X	-0.960857	0.961925
Os08g0544800	TCP	0.978925	3	sen+	X	n.s.	n.s.
Os08g0546800	HSF	0.876277	3	sen+	X	-0.980348	0.991963
Os09g0379600	HD-ZIP	0.915173	3	sen+	X	n.s.	n.s.
Os09g0431900	C2H2	0.908818	3		X	n.s.	n.s.
Os09g0466400	ZF-HD	0.99431	3	sen+	not present	-	-
Os09g0474100	bHLH	0.77489	3	sen+	X	n.s.	n.s.
Os09g0491644	MYB	0.993948	3	sen+	X	-0.967206	0.992429
Os09g0526600	HSF	0.940746	3	sen+	X	-0.977416	0.993127
Os10g0516500	Trihelix	0.800482	3	sen+	X	-0.979206	0.990605
Os11g0117400	WRKY	0.787156	3	sen+	X	-0.924427	0.960352
Os11g0197600	B3	0.982503	3	sen+	X	n.s.	n.s.
Os12g0116600	WRKY	0.937917	3		X	n.s.	n.s.
Os12g0116700	WRKY	0.980473	3	sen+	not present	-	-

## Sheet: Z. mays
Gene ID	TF class	score	Cluster	class
Zm00001d039267	ARF	0.96818	2	sen+
Zm00001d007172	B3	0.784856	2	sen+
Zm00001d042263	bHLH	0.747113	2	sen+
Zm00001d047017	bHLH	0.921405	2	sen+
Zm00001d018178	bZIP	0.876727	2	sen+
Zm00001d028936	bZIP	0.993152	2	sen+
Zm00001d043992	bZIP	0.96583	2	sen+
Zm00001d007042	bZIP	0.94961	2	sen+
Zm00001d030858	C2H2	0.956063	2	sen+
Zm00001d034145	C2H2	0.897735	2	sen+
Zm00001d035701	C2H2	0.878198	2	sen+
Zm00001d038297	C2H2	0.851751	2	sen+/tol-
Zm00001d006682	C2H2	0.875957	2	sen+
Zm00001d023557	C2H2	0.803991	2	sen+
Zm00001d028139	C2H2	0.872872	2	sen+
Zm00001d023636	C3H	0.821436	2	sen+
Zm00001d024200	CO-like	0.912928	2	sen+
Zm00001d032999	Dof	0.723229	2	sen+
Zm00001d032295	ERF	0.935989	2	sen+
Zm00001d034920	ERF	0.69042	2	tol+
Zm00001d043205	ERF	0.941378	2	sen+
Zm00001d049364	ERF	0.913677	2	sen+
Zm00001d016616	ERF	0.83594	2	sen+
Zm00001d018305	ERF	0.709942	2	sen+
Zm00001d046981	G2-like	0.980421	2	sen+
Zm00001d012757	GATA	0.877237	2	sen+
Zm00001d048588	GRAS	0.753286	2	sen+
Zm00001d038225	GRAS	0.977836	2	sen+
Zm00001d002799	HD-ZIP	0.723177	2	sen+
Zm00001d025964	HD-ZIP	0.859799	2	sen+
Zm00001d005888	HSF	0.963798	2	sen+
Zm00001d016255	HSF	0.940232	2	sen+
Zm00001d020714	HSF	0.87522	2	sen+
Zm00001d052738	HSF	0.940665	2	sen+
Zm00001d047752	LBD	0.939704	2	sen+
Zm00001d021761	MYB	0.900266	2	sen+
Zm00001d030644	MYB	0.799792	2	sen+
Zm00001d039893	MYB	0.92931	2	sen+
Zm00001d040621	MYB	0.812437	2	sen+/tol-
Zm00001d041580	MYB	0.964895	2	sen+
Zm00001d017383	MYB	0.977462	2	sen+
Zm00001d051480	MYB_related	0.88966	2	sen+
Zm00001d002285	NAC	0.843363	2	sen+
Zm00001d021069	NAC	0.992948	2	sen+
Zm00001d022424	NAC	0.878803	2	sen+
Zm00001d023669	NAC	0.752269	2	sen+
Zm00001d034277	NAC	0.951834	2	sen+
Zm00001d038221	NAC	0.742277	2	sen+
Zm00001d041472	NAC	0.791425	2	sen+
Zm00001d042609	NAC	0.97589	2	sen+
Zm00001d050893	NAC	0.917403	2	sen+
Zm00001d008399	NAC	0.848128	2	sen+
Zm00001d011969	NAC	0.993598	2	sen+
Zm00001d013151	NAC	0.985595	2	sen+
Zm00001d007436	NF-YC	0.947882	2	sen+
Zm00001d052621	NF-YC	0.939212	2	sen+
Zm00001d038907	RAV	0.936727	2	sen+
Zm00001d017420	Trihelix	0.990883	2	sen+
Zm00001d038994	Trihelix	0.979762	2	sen+
Zm00001d043076	WOX	0.979445	2	sen+
Zm00001d002405	WRKY	0.983032	2	sen+
Zm00001d026252	WRKY	0.892296	2	sen+
Zm00001d028962	WRKY	0.856901	2	sen+
Zm00001d035323	WRKY	0.982341	2	sen+
Zm00001d038023	WRKY	0.92611	2	sen+
Zm00001d039245	WRKY	0.976715	2	sen+
Zm00001d041740	WRKY	0.824593	2	sen+
Zm00001d043950	WRKY	0.865021	2	sen+
Zm00001d006001	WRKY	0.819018	2	sen+/tol-
Zm00001d049173	WRKY	0.96196	2	sen+
Zm00001d052357	WRKY	0.98081	2	sen+
Zm00001d053369	WRKY	0.985524	2	sen+
Zm00001d008794	WRKY	0.986194	2	sen+
Zm00001d010399	WRKY	0.993762	2	sen+
Zm00001d034629	AP2	0.553396	4	tol+
Zm00001d039006	ARF	0.964652	4	sen-
Zm00001d012128	ARR-B	0.771701	4	sen-
Zm00001d042463	ARR-B	0.995301	4	sen-
Zm00001d004358	B3	0.857574	4	sen-
Zm00001d034965	B3	0.884804	4	sen-
Zm00001d034298	bHLH	0.874021	4	sen-
Zm00001d008205	bHLH	0.899241	4	sen-
Zm00001d022442	bZIP	0.910396	4	sen-
Zm00001d031697	bZIP	0.897196	4	sen-
Zm00001d038296	bZIP	0.890901	4	sen-
Zm00001d053967	bZIP	0.655758	4	tol+
Zm00001d012719	bZIP	0.942046	4	sen-
Zm00001d015118	bZIP	0.891013	4	sen-
Zm00001d005837	C2H2	0.951355	4	sen-
Zm00001d028371	C2H2	0.874389	4	sen-
Zm00001d036297	C2H2	0.889012	4	sen-
Zm00001d026536	C3H	0.716104	4	tol+
Zm00001d042363	C3H	0.732971	4	sen-
Zm00001d013443	CO-like	0.715839	4	sen-
Zm00001d033719	CO-like	0.76671	4	sen-
Zm00001d017147	DBB	0.872274	4	sen-/tol+
Zm00001d017176	DBB	0.716897	4	sen-/tol+
Zm00001d051018	DBB	0.639608	4	sen-/tol+
Zm00001d017575	Dof	0.997411	4	sen-
Zm00001d028625	Dof	0.826042	4	sen-
Zm00001d026486	ERF	0.916942	4	sen-
Zm00001d039989	ERF	0.896797	4	sen-
Zm00001d051451	ERF	0.858389	4	sen-
Zm00001d002649	G2-like	0.903387	4	sen-
Zm00001d009193	GATA	0.672779	4	sen-
Zm00001d016361	GATA	0.963246	4	sen-
Zm00001d040254	GeBP	0.920848	4	sen-
Zm00001d003553	GRAS	0.980171	4	sen-
Zm00001d029607	GRAS	0.875073	4	sen-
Zm00001d030500	GRAS	0.808217	4	sen-
Zm00001d033834	GRAS	0.901702	4	sen-
Zm00001d040090	HD-ZIP	0.856733	4	sen-
Zm00001d051749	HD-ZIP	0.90769	4	sen-
Zm00001d035195	LSD	0.91581	4	sen-
Zm00001d039913	M-type_MADS	0.886992	4	sen-
Zm00001d020569	MYB	0.717321	4	sen-
Zm00001d018097	MYB	0.971113	4	sen-
Zm00001d011297	MYB_related	0.891189	4	sen-/tol+
Zm00001d017507	MYB_related	0.866927	4	sen-
Zm00001d017782	MYB_related	0.740583	4	sen-
Zm00001d002934	NAC	0.875717	4	sen-
Zm00001d022099	NF-YB	0.804473	4	sen-
Zm00001d028432	NF-YC	0.908612	4	sen-
Zm00001d052838	NF-YC	0.952058	4	sen-
Zm00001d006028	SBP	0.933763	4	sen-
Zm00001d046223	TALE	0.956168	4	sen-
Zm00001d012725	TCP	0.941951	4	sen-
Zm00001d018045	TCP	0.759797	4	sen-
Zm00001d025896	TCP	0.86086	4	sen-
Zm00001d037221	TCP	0.756506	4	sen-
Zm00001d039371	TCP	0.986907	4	sen-
Zm00001d044836	TCP	0.799915	4	sen-
Zm00001d015605	Trihelix	0.971817	4	sen-
Zm00001d054080	Trihelix	0.773858	4	sen-
Zm00001d036148	Whirly	0.84786	4	sen-
Zm00001d008612	WOX	0.995817	4	sen-
Zm00001d047574	WRKY	0.87416	4
Zm00001d050022	WRKY	0.989349	4	sen-
Zm00001d052847	WRKY	0.644844	4	sen-
Zm00001d039116	ZF-HD	0.938164	4	sen-
Zm00001d041780	ZF-HD	0.918598	4	sen-
Zm00001d050443	ZF-HD	0.958123	4	sen-
