# Supplementary material for: A Comparative Transcriptomic Meta-Analysis Revealed Conserved Key Genes and Regulatory Networks Involved in Drought Tolerance in Cereal Crops
Source: Int J Mol Sci. 2021 Dec 2;22(23):13062. doi: 10.3390/ijms222313062 (PMC8657901; doi:10.3390/ijms222313062)
Supplement: Supplementary file 1 [file ijms-22-13062-s001.zip › Supplementary_File_S6.xlsx]

## Sheet: TF-69_osmotic_0.9
Gene A	Gene B	r
Os_26	Os_44	0.999043
Os_C2H2_37	Os_NAC_47	0.998803
Os_bZIP_49	Os_C2H2_38	0.998389
Os_MYB_related_17	Os_TALE_1	0.99838
Os_44	Os_DBB_4	0.997988
Os_bZIP_63	Os_HSF_17	0.997953
Os_MYB_46	Os_NAC_17	0.997803
Os_MYB_48	Os_WRKY_22	0.997708
Os_bZIP_49	Os_NAC_17	0.99768
Os_MYB_45	Os_MYB_related_37	0.997659
Os_bZIP_47	Os_WRKY_27	0.997606
Os_31	Os_ERF_49	0.997592
Os_20	Os_NF.YB	0.997581
Os_20	Os_23	0.997578
Os_16	Os_DBB_4	0.997576
Os_20	Os_29	0.997562
Os_31	Os_NAC_44	0.997457
Os_13	Os_WRKY_52	0.99734
Os_20	Os_26	0.997312
Os_NAC_17	Os_NAC_47	0.997309
Os_bZIP_13	Os_NAC_47	0.997297
Os_16	Os_26	0.997294
Os_C2H2_37	Os_WRKY_11	0.997269
Os_13	Os_MYB_45	0.997208
Os_ARF_3	Os_LBD_2	0.997195
Os_C2H2_38	Os_NAC_17	0.997153
Os_bZIP_49	Os_NAC_47	0.997116
Os_MYB_45	Os_WRKY_46	0.997071
Os_26	Os_DBB_4	0.99707
Os_20	Os_28	0.997065
Os_20	Os_44	0.997044
Os_16	Os_44	0.997028
Os_58	Os_Dof_15	0.996962
Os_16	Os_29	0.99695
Os_13	Os_MYB_related_37	0.996937
Os_MYB_related_17	Os_NF.YB	0.996906
Os_44	Os_TALE_1	0.996868
Os_MYB_44	Os_NAC_8	0.996863
Os_C2H2_38	Os_MYB_46	0.996855
Os_HSF_15	Os_MYB_49	0.996795
Os_C3H_21	Os_ERF_3	0.996769
Os_41	Os_MYB_related_11	0.996756
Os_G2.like_5	Os_WRKY_22	0.996744
Os_MYB_11	Os_NAC_17	0.996722
Os_31	Os_WRKY_22	0.996705
Os_bZIP_13	Os_NAC_40	0.99668
Os_HSF_2	Os_MYB_related_37	0.99667
Os_44	Os_MYB_related_17	0.996638
Os_G2.like_28	Os_HD.ZIP_20	0.996636
Os_31	Os_WRKY_27	0.996616
Os_bHLH_60	Os_bZIP_53	0.996608
Os_23	Os_26	0.996585
Os_22	Os_23	0.996581
Os_bZIP_13	Os_MYB_11	0.99658
Os_CO.like_11	Os_NF.X1_2.1	0.996564
Os_C2H2_36	Os_NAC_17	0.996562
Os_28	Os_NF.YB	0.996545
Os_NAC_47	Os_WRKY_11	0.996544
Os_C2H2_34	Os_NAC_14	0.996531
Os_ARR.B_4	Os_bZIP_47	0.996529
Os_NAC_17	Os_WRKY_11	0.996513
Os_58	Os_WRKY_46	0.996497
Os_Dof_15	Os_MYB_related_37	0.996484
Os_HD.ZIP_5	Os_MYB_related_11	0.99645
Os_bZIP_13	Os_C2H2_37	0.996448
Os_CO.like_11	Os_NAC_14	0.996424
Os_23	Os_44	0.99642
Os_32	Os_G2.like_5	0.996408
Os_32	Os_NAC_33	0.996266
Os_bHLH_11	Os_bZIP_57	0.996256
Os_bZIP_54	Os_HSF_6	0.996239
Os_58	Os_NAC_8	0.996238
Os_C3H_22	Os_MYB_related_11	0.996232
Os_ARR.B_4	Os_VOZ	0.996218
Os_HSF_17	Os_HSF_2	0.996216
Os_NAC_14	Os_NAC_7	0.99621
Os_C2H2_37	Os_NAC_17	0.996209
Os_MYB_11	Os_NAC_47	0.996191
Os_C2H2_38	Os_NAC_47	0.996176
Os_HSF_17	Os_MYB_related_37	0.996171
Os_MYB_48	Os_NAC_43	0.996164
Os_62	Os_NF.YB	0.996144
Os_C3H_22	Os_ERF_33	0.996106
Os_NF.YB	Os_TALE_1	0.996097
Os_19	Os_34	0.996094
Os_1	Os_C3H_5	0.996093
Os_bZIP_63	Os_Trihelix_3	0.996074
Os_NAC_14	Os_NAC_17	0.996072
Os_12	Os_28	0.996062
Os_G2.like_27	Os_WRKY_52	0.99605
Os_NAC_14	Os_NF.X1_2.1	0.996017
Os_C2H2_37	Os_NAC_40	0.996001
Os_bZIP_57	Os_HSF_6	0.995968
Os_bZIP_47	Os_G2.like_27	0.995968
Os_MYB_45	Os_WRKY_52	0.995961
Os_ERF_19	Os_NAC_14	0.995959
Os_MYB_41	Os_WRKY_52	0.995955
Os_bZIP_54	Os_WRKY_52	0.995953
Os_bZIP_15	Os_bZIP_20	0.99594
Os_ERF_3	Os_VOZ	0.995935
Os_ERF_19	Os_NAC_7	0.995915
Os_32	Os_WRKY_22	0.995911
Os_NAC_40	Os_NAC_47	0.995891
Os_CO.like_11	Os_ERF_3	0.995859
Os_bZIP_53	Os_HSF_11	0.995858
Os_HD.ZIP_18	Os_MYB_related_11	0.995835
Os_31	Os_32	0.995825
Os_bZIP_49	Os_MYB_46	0.995814
Os_bZIP_47	Os_C3H_21	0.995811
Os_48	Os_WRKY_52	0.995807
Os_32	Os_NAC_31	0.995783
Os_NAC_47	Os_NAC_7	0.995776
Os_Dof_15	Os_HSF_17	0.995767
Os_Dof_15	Os_MYB_46	0.995741
Os_ARF_16	Os_MYB_related_37	0.995739
Os_ARF_14	Os_ARF_16	0.995738
Os_23	Os_NF.YB	0.995731
Os_bZIP_49	Os_WRKY_11	0.995708
Os_41	Os_C3H_22	0.995702
Os_bZIP_53	Os_WOX	0.995687
Os_58	Os_bZIP_15	0.995643
Os_bZIP_13	Os_C2H2_36	0.995638
Os_Dof_15	Os_HSF_2	0.995626
Os_MYB_46	Os_NAC_14	0.995607
Os_48	Os_bZIP_49	0.995587
Os_MYB_related_24	Os_NAC_1	0.995585
Os_DBB_4	Os_TALE_1	0.995564
Os_bZIP_47	Os_NAC_33	0.995564
Os_26	Os_TALE_1	0.995562
Os_ERF_49	Os_NAC_44	0.995543
Os_HD.ZIP_19	Os_MYB_45	0.995517
Os_62	Os_MYB_16	0.995516
Os_Dof_15	Os_WRKY_46	0.995496
Os_bZIP_53	Os_NAC_40	0.99549
Os_48	Os_NAC_33	0.995486
Os_C2H2_37	Os_NAC_7	0.995477
Os_C2H2_36	Os_C2H2_37	0.995458
Os_bZIP_63	Os_Dof_13	0.995455
Os_Dof_15	Os_G2.like_28	0.995453
Os_16	Os_20	0.99544
Os_HSF_16	Os_MYB_related_37	0.995421
Os_bZIP_49	Os_C2H2_37	0.995421
Os_MYB_43	Os_NAC_43	0.995419
Os_31	Os_Trihelix_14	0.995406
Os_bZIP_13	Os_NAC_17	0.995403
Os_29	Os_46	0.995396
Os_31	Os_MYB_48	0.995395
Os_bZIP_49	Os_WRKY_52	0.995395
Os_Trihelix_14	Os_WRKY_11	0.995394
Os_ERF_49	Os_WRKY_22	0.995377
Os_bZIP_53	Os_ERF_49	0.995366
Os_bZIP_20	Os_G2.like_27	0.995353
Os_MYB_related_9	Os_NF.YB	0.995331
Os_12	Os_62	0.995308
Os_MYB_11	Os_NAC_7	0.995306
Os_NAC_40	Os_WRKY_11	0.995265
Os_C2H2_36	Os_NAC_47	0.995259
Os_G2.like_5	Os_MYB_48	0.995234
Os_NAC_40	Os_Trihelix_14	0.995215
Os_bHLH_12	Os_NF.YC_6	0.995211
Os_MYB_43	Os_MYB_48	0.995184
Os_C2H2_38	Os_NAC_8	0.995179
Os_NAC_7	Os_WRKY_11	0.995178
Os_21	Os_WRKY_61	0.995178
Os_HSF_2	Os_WRKY_46	0.995177
Os_ERF_3	Os_ERF_33	0.995162
Os_32	Os_WRKY_27	0.995151
Os_Dof_15	Os_WRKY_58	0.99514
Os_MYB_43	Os_Trihelix_14	0.995118
Os_NAC_17	Os_NAC_7	0.995106
Os_bZIP_49	Os_MYB_44	0.995095
Os_NAC_44	Os_WRKY_27	0.995082
Os_bZIP_49	Os_NAC_14	0.995082
Os_32	Os_NAC_44	0.995081
Os_ARF_3	Os_MYB_related_10	0.995072
Os_VOZ	Os_WRKY_27	0.995063
Os_MYB_44	Os_NAC_17	0.995061
Os_20	Os_MYB_related_17	0.995044
Os_C2H2_38	Os_MYB_44	0.99504
Os_C2H2_37	Os_MYB_11	0.995038
Os_C2H2_38	Os_WRKY_11	0.995024
Os_bHLH_10	Os_bZIP_5	0.994998
Os_12	Os_NF.YB	0.994998
Os_bZIP_47	Os_VOZ	0.994991
Os_Dof_15	Os_MYB_45	0.994968
Os_MYB_44	Os_WRKY_58	0.994943
Os_23	Os_TALE_1	0.994938
Os_bZIP_53	Os_Trihelix_14	0.994937
Os_ERF_3	Os_GRAS_17	0.994926
Os_ARF_16	Os_HSF_6	0.994921
Os_NAC_40	Os_WOX	0.994886
Os_58	Os_MYB_44	0.994872
Os_HD.ZIP_19	Os_MYB_related_37	0.994866
Os_G2.like_5	Os_NAC_33	0.994862
Os_C2H2_36	Os_MYB_11	0.994857
Os_C2H2_38	Os_NAC_14	0.994854
Os_C2H2_38	Os_Dof_15	0.99483
Os_MYB_11	Os_MYB_46	0.99483
Os_28	Os_62	0.994809
Os_HSF_16	Os_HSF_17	0.994806
Os_Dof_15	Os_NAC_17	0.994798
Os_C2H2_37	Os_C2H2_38	0.994797
Os_NAC_43	Os_WRKY_22	0.99479
Os_13	Os_HD.ZIP_19	0.994788
Os_44	Os_NF.YB	0.994787
Os_bHLH_12	Os_MYB_related_17	0.994771
Os_bZIP_63	Os_Dof_15	0.99477
Os_31	Os_NAC_17	0.99477
Os_ERF_49	Os_Trihelix_14	0.994767
Os_26	Os_29	0.994767
Os_bHLH_60	Os_WOX	0.994759
Os_NAC_33	Os_WRKY_27	0.994749
Os_HD.ZIP_5	Os_HD.ZIP_18	0.99473
Os_20	Os_DBB_4	0.994725
Os_26	Os_8	0.99472
Os_G2.like_5	Os_NAC_43	0.994698
Os_bZIP_15	Os_MYB_related_37	0.994654
Os_C2H2_34	Os_Dof_15	0.994636
Os_bHLH_60	Os_NAC_40	0.994636
Os_HSF_16	Os_HSF_2	0.994628
Os_C2H2_36	Os_WRKY_52	0.994626
Os_HSF_6	Os_MYB_related_34	0.994614
Os_MYB_related_9	Os_TALE_1	0.994612
Os_44	Os_8	0.994605
Os_34	Os_NF.YC_6	0.994602
Os_bZIP_11	Os_HSF_1	0.994565
Os_bZIP_49	Os_WRKY_22	0.994564
Os_NAC_33	Os_WRKY_52	0.994563
Os_31	Os_bZIP_49	0.994561
Os_NAC_17	Os_WRKY_22	0.994557
Os_22	Os_36	0.994553
Os_Dof_15	Os_Trihelix_3	0.994542
Os_1	Os_LBD_2	0.994525
Os_26	Os_MYB_related_17	0.994512
Os_bZIP_54	Os_MYB_related_34	0.994501
Os_MYB_43	Os_WRKY_22	0.994497
Os_bZIP_11	Os_MYB_related_9	0.994492
Os_NAC_14	Os_NAC_47	0.994491
Os_ARF_16	Os_G2.like_28	0.994479
Os_MYB_related_37	Os_WRKY_46	0.994472
Os_bHLH_20	Os_NF.YC_6	0.99447
Os_ERF_49	Os_WRKY_11	0.994469
Os_C3H_22	Os_CO.like_11	0.994451
Os_bZIP_49	Os_NAC_8	0.994431
Os_MYB_related_37	Os_WRKY_52	0.994424
Os_C2H2_36	Os_C2H2_38	0.994401
Os_Trihelix_14	Os_WRKY_22	0.994392
Os_bHLH_12	Os_NF.YB	0.994391
Os_NAC_40	Os_NAC_7	0.994388
Os_bZIP_63	Os_MYB_related_35	0.994387
Os_20	Os_TALE_1	0.994385
Os_ARF_13	Os_bZIP_47	0.994379
Os_MYB_46	Os_NAC_47	0.994374
Os_ARR.B_3	Os_bHLH_50	0.994373
Os_HSF_11	Os_NAC_31	0.994372
Os_MYB_48	Os_NAC_42	0.994367
Os_HSF_17	Os_Trihelix_3	0.994367
Os_ARR.B_4	Os_C3H_21	0.994352
Os_58	Os_MYB_45	0.99435
Os_bZIP_49	Os_MYB_41	0.994349
Os_31	Os_NAC_33	0.994346
Os_ARF_16	Os_C3H_22	0.994342
Os_20	Os_46	0.994336
Os_bZIP_20	Os_bZIP_4	0.994324
Os_48	Os_MYB_41	0.994318
Os_HSF_2	Os_MYB_45	0.994309
Os_C3H_21	Os_MYB_related_34	0.994279
Os_46	Os_67	0.994245
Os_NF.YC_6	Os_TALE_1	0.994243
Os_MYB_44	Os_NAC_42	0.994241
Os_bZIP_49	Os_NAC_33	0.994239
Os_27	Os_Trihelix_3	0.994238
Os_ARF_13	Os_G2.like_28	0.994234
Os_bHLH_3	Os_ERF_43	0.994209
Os_bZIP_49	Os_C2H2_36	0.994205
Os_32	Os_MYB_41	0.994167
Os_bZIP_47	Os_ERF_3	0.994161
Os_bZIP_13	Os_bZIP_49	0.994146
Os_C3H_22	Os_NAC_14	0.994142
Os_MYB_46	Os_WRKY_11	0.99414
Os_29	Os_NF.YB	0.994135
Os_20	Os_62	0.994095
Os_bZIP_57	Os_HSF_9	0.994094
Os_MYB_43	Os_WRKY_11	0.99409
Os_bZIP_63	Os_MYB_related_37	0.994087
Os_bZIP_47	Os_WRKY_52	0.994087
Os_bZIP_13	Os_Trihelix_14	0.994086
Os_NF.YB	Os_NF.YC_6	0.994068
Os_bZIP_54	Os_G2.like_27	0.994062
Os_bZIP_15	Os_WRKY_46	0.994061
Os_C2H2_38	Os_WRKY_52	0.994057
Os_29	Os_DBB_4	0.994051
Os_29	Os_44	0.994034
Os_MYB_41	Os_MYB_45	0.994032
Os_ARF_13	Os_ERF_3	0.994029
Os_ERF_49	Os_WOX	0.99402
Os_NAC_42	Os_WRKY_11	0.99401
Os_MYB_48	Os_Trihelix_14	0.994002
Os_bZIP_49	Os_ERF_49	0.994002
Os_13	Os_G2.like_27	0.993997
Os_MYB_related_17	Os_NF.YC_6	0.993996
Os_MYB_related_27	Os_MYB_related_31	0.993992
Os_C2H2_34	Os_C2H2_38	0.993989
Os_G2.like_10	Os_LBD_2	0.993981
Os_C2H2_34	Os_ERF_19	0.993979
Os_22	Os_44	0.993965
Os_NAC_17	Os_WRKY_52	0.993961
Os_C2H2_36	Os_MYB_46	0.993956
Os_C2H2_30	Os_MYB_41	0.993954
Os_Dof_15	Os_NAC_14	0.993951
Os_bZIP_60	Os_ERF_3	0.993944
Os_ARF_16	Os_C2H2_34	0.993931
Os_bHLH_60	Os_HSF_11	0.99393
Os_DBB_4	Os_MYB_related_17	0.993924
Os_bZIP_20	Os_HD.ZIP_19	0.993917
Os_12	Os_ARF_6	0.993914
Os_23	Os_29	0.993899
Os_ARF_16	Os_bZIP_60	0.993892
Os_NAC_8	Os_WRKY_46	0.993882
Os_ARF_13	Os_VOZ	0.993881
Os_NAC_17	Os_Trihelix_14	0.993873
Os_32	Os_48	0.993871
Os_WRKY_11	Os_WRKY_22	0.993867
Os_ERF_33	Os_NAC_14	0.993866
Os_58	Os_C2H2_38	0.993852
Os_23	Os_28	0.99385
Os_5	Os_MYB_related_10	0.993849
Os_31	Os_NAC_43	0.99383
Os_G2.like_27	Os_MYB_45	0.993816
Os_bZIP_63	Os_G2.like_28	0.993803
Os_bZIP_60	Os_HD.ZIP_20	0.993788
Os_G2.like_28	Os_MYB_related_37	0.993788
Os_ARF_16	Os_bZIP_63	0.993779
Os_NAC_17	Os_NAC_42	0.993776
Os_32	Os_bZIP_47	0.993775
Os_ARF_14	Os_G2.like_27	0.993759
Os_bHLH_12	Os_ZF.HD_2	0.993753
Os_bZIP_54	Os_MYB_28	0.993748
Os_bZIP_2	Os_HSF_16	0.993746
Os_23	Os_DBB_4	0.993746
Os_5	Os_53	0.993719
Os_bZIP_49	Os_MYB_11	0.993707
Os_NAC_14	Os_WRKY_11	0.993702
Os_bZIP_60	Os_MYB_45	0.993702
Os_ARF_15	Os_CPP_7	0.9937
Os_bZIP_49	Os_MYB_45	0.9937
Os_ARF_16	Os_Dof_13	0.993698
Os_19	Os_NF.YB	0.993677
Os_MYB_43	Os_NAC_40	0.993674
Os_bZIP_2	Os_HSF_17	0.993658
Os_C2H2_34	Os_MYB_46	0.993649
Os_23	Os_MYB_related_9	0.993631
Os_MYB_41	Os_MYB_44	0.993624
Os_bZIP_54	Os_ERF_33	0.993615
Os_MYB_48	Os_WRKY_11	0.993608
Os_13	Os_MYB_41	0.993605
Os_HSF_6	Os_WRKY_52	0.993588
Os_bZIP_53	Os_WRKY_22	0.993586
Os_bZIP_48	Os_HSF_9	0.993572
Os_ERF_49	Os_MYB_48	0.993571
Os_MYB_11	Os_NAC_14	0.993568
Os_Dof_13	Os_ERF_40	0.993559
Os_ERF_33	Os_HSF_6	0.993553
Os_C2H2_38	Os_WRKY_46	0.993541
Os_26	Os_NF.YB	0.993534
Os_ARF_13	Os_NAC_33	0.993531
Os_ERF_33	Os_GRAS_17	0.993528
Os_ARR.B_4	Os_ERF_3	0.99352
Os_bZIP_15	Os_G2.like_27	0.993509
Os_MYB_related_17	Os_MYB_related_9	0.993507
Os_WRKY_27	Os_WRKY_40	0.993507
Os_48	Os_NAC_17	0.993503
Os_ERF_33	Os_MYB_related_34	0.993499
Os_12	Os_20	0.993489
Os_bHLH_11	Os_HSF_6	0.993489
Os_C3H_21	Os_VOZ	0.993471
Os_bZIP_20	Os_HSF_16	0.993466
Os_bZIP_15	Os_MYB_45	0.993459
Os_WRKY_51	Os_WRKY_54	0.993458
Os_48	Os_WRKY_22	0.993455
Os_28	Os_MYB_related_17	0.993454
Os_19	Os_NF.YC_6	0.99345
Os_23	Os_MYB_related_17	0.993439
Os_C2H2_38	Os_MYB_45	0.99343
Os_ARF_13	Os_CO.like_11	0.993403
Os_22	Os_DBB_4	0.993391
Os_ARR.B_4	Os_G2.like_27	0.993383
Os_MYB_46	Os_NAC_7	0.993379
Os_NAC_17	Os_WRKY_58	0.993379
Os_ARR.B_4	Os_CO.like_11	0.993368
Os_bZIP_13	Os_WRKY_11	0.993348
Os_NAC_42	Os_NF.X1_2.1	0.993329
Os_13	Os_bZIP_54	0.993321
Os_23	Os_C2H2_9	0.993319
Os_bZIP_11	Os_TALE_1	0.993308
Os_bZIP_20	Os_MYB_related_37	0.993308
Os_58	Os_MYB_46	0.993301
Os_GATA_8	Os_NF.YB_5	0.993285
Os_ERF_3	Os_MYB_related_34	0.993274
Os_ARF_16	Os_bZIP_4	0.993246
Os_48	Os_C2H2_38	0.993235
Os_WRKY_46	Os_WRKY_58	0.993229
Os_13	Os_bZIP_60	0.993227
Os_bZIP_20	Os_HSF_5	0.99322
Os_HSF_17	Os_MYB_related_35	0.993214
Os_C2H2_34	Os_NAC_17	0.993209
Os_58	Os_MYB_related_37	0.993207
Os_MYB_46	Os_NAC_8	0.993202
Os_13	Os_48	0.993198
Os_19	Os_bHLH_12	0.993192
Os_MYB_28	Os_MYB_related_34	0.993189
Os_bZIP_20	Os_MYB_45	0.993186
Os_16	Os_bZIP_17	0.993173
Os_ARF_16	Os_ARR.B_4	0.99316
Os_16	Os_8	0.993154
Os_NAC_33	Os_NAC_44	0.993154
Os_ARF_16	Os_HSF_17	0.993152
Os_ERF_33	Os_MYB_11	0.993145
Os_NAC_17	Os_NAC_40	0.993145
Os_Dof_15	Os_MYB_44	0.993142
Os_1	Os_MYB_related_10	0.993138
Os_8	Os_TALE_1	0.99313
Os_58	Os_HSF_5	0.993127
Os_C2H2_34	Os_MYB_11	0.993127
Os_bZIP_2	Os_ERF_10	0.99312
Os_27	Os_WRKY_46	0.993095
Os_HSF_16	Os_MYB_45	0.993093
Os_C2H2_34	Os_MYB_related_11	0.993093
Os_C3H_22	Os_Dof_15	0.993085
Os_bHLH_60	Os_ERF_49	0.993085
Os_29	Os_ZF.HD_1	0.993084
Os_ARF_16	Os_ERF_3	0.993082
Os_ARF_16	Os_G2.like_27	0.993081
Os_C2H2_34	Os_NAC_7	0.993078
Os_NAC_33	Os_WRKY_22	0.993077
Os_NAC_14	Os_NAC_42	0.993076
Os_G2.like_27	Os_HSF_6	0.993072
Os_31	Os_bZIP_53	0.993069
Os_MYB_related_36	Os_WRKY_33	0.993068
Os_CO.like_11	Os_G2.like_28	0.993068
Os_ERF_3	Os_WRKY_27	0.993064
Os_8	Os_DBB_4	0.993063
Os_bZIP_2	Os_HSF_5	0.993054
Os_43	Os_ERF_40	0.993033
Os_HD.ZIP_19	Os_WRKY_52	0.993019
Os_MYB_44	Os_MYB_46	0.993006
Os_C3H_22	Os_HSF_17	0.993005
Os_C2H2_6	Os_MYB_related_15	0.993004
Os_bZIP_47	Os_bZIP_60	0.992998
Os_NAC_40	Os_WRKY_22	0.992988
Os_SRS_2	Os_WRKY_46	0.992986
Os_bZIP_20	Os_NAC_46	0.992982
Os_32	Os_C2H2_30	0.992963
Os_MYB_48	Os_NAC_17	0.992962
Os_ARF_13	Os_WRKY_27	0.992957
Os_1	Os_bZIP_24	0.99295
Os_MYB_38	Os_MYB_related_35	0.992948
Os_bZIP_49	Os_Dof_15	0.992927
Os_C2H2_36	Os_WRKY_11	0.992924
Os_32	Os_bZIP_49	0.992922
Os_WRKY_22	Os_WRKY_27	0.992922
Os_41	Os_HD.ZIP_5	0.992918
Os_16	Os_23	0.992916
Os_MYB_46	Os_WRKY_58	0.992914
Os_ERF_1	Os_NF.X1_2.1	0.992914
Os_Dof_15	Os_MYB_related_11	0.992911
Os_31	Os_ERF_3	0.992909
Os_bZIP_54	Os_bZIP_57	0.992903
Os_bZIP_4	Os_bZIP_49	0.992897
Os_22	Os_26	0.992895
Os_C2H2_30	Os_NAC_45	0.992895
Os_MYB_45	Os_NAC_17	0.992892
Os_bHLH_20	Os_MYB_related_17	0.992881
Os_MYB_44	Os_WRKY_22	0.992879
Os_ARF_16	Os_Dof_15	0.992874
Os_C3H_22	Os_ERF_3	0.99287
Os_bZIP_57	Os_ERF_33	0.992857
Os_58	Os_NAC_17	0.992852
Os_ERF_49	Os_NAC_43	0.99285
Os_bZIP_13	Os_NAC_7	0.992846
Os_NAC_8	Os_WRKY_58	0.992841
Os_8	Os_TCP_1	0.992841
Os_C2H2_38	Os_WRKY_58	0.992839
Os_bZIP_47	Os_bZIP_49	0.992836
Os_G2.like_10	Os_MYB_related_15	0.992827
Os_G2.like_28	Os_MYB_45	0.992824
Os_C2H2_34	Os_C3H_22	0.992815
Os_C2H2_39	Os_ERF_51	0.99281
Os_32	Os_ERF_49	0.992808
Os_ARF_16	Os_MYB_45	0.992803
Os_12	Os_MYB_related_17	0.992802
Os_C3H_21	Os_WRKY_27	0.992794
Os_DBB_6	Os_MYB_related_5	0.992783
Os_C2H2_37	Os_MYB_46	0.992775
Os_NAC_17	Os_NAC_8	0.992765
Os_C2H2_34	Os_CO.like_11	0.992764
Os_bHLH_50	Os_MYB_28	0.992761
Os_CO.like_5	Os_MYB_48	0.992758
Os_58	Os_bZIP_49	0.992752
Os_58	Os_MYB_41	0.992752
Os_ERF_1	Os_NAC_7	0.992749
Os_bZIP_37	Os_NAC_47	0.992746
Os_58	Os_bZIP_20	0.992744
Os_32	Os_NAC_43	0.992741
Os_ARF_13	Os_ARR.B_4	0.992728
Os_ERF_3	Os_NAC_14	0.992726
Os_MYB_39	Os_Trihelix_3	0.992719
Os_20	Os_ZF.HD_1	0.992705
Os_31	Os_WRKY_11	0.992704
Os_32	Os_MYB_related_36	0.992703
Os_bHLH_12	Os_TALE_1	0.992703
Os_bHLH_12	Os_bHLH_20	0.992697
Os_HD.ZIP_19	Os_HSF_16	0.992685
Os_ARR.B_4	Os_WRKY_27	0.992673
Os_bZIP_49	Os_NAC_7	0.992668
Os_32	Os_GATA_8	0.992663
Os_MYB_11	Os_MYB_related_11	0.992651
Os_DBB_4	Os_NF.YB	0.992651
Os_bZIP_4	Os_C2H2_38	0.992645
Os_ARF_13	Os_HD.ZIP_20	0.992634
Os_C2H2_38	Os_NAC_33	0.992624
Os_NF.YB	Os_ZF.HD_2	0.992616
Os_G2.like_28	Os_MYB_44	0.992615
Os_44	Os_NF.YC_6	0.992614
Os_ERF_19	Os_HD.ZIP_5	0.99261
Os_NAC_43	Os_NAC_44	0.992608
Os_MYB_41	Os_NAC_17	0.992604
Os_31	Os_bZIP_47	0.992603
Os_NAC_11	Os_NAC_46	0.99259
Os_Dof_15	Os_NAC_8	0.992588
Os_31	Os_G2.like_5	0.992566
Os_MYB_related_35	Os_Trihelix_3	0.992565
Os_62	Os_ZF.HD_2	0.992558
Os_C3H_21	Os_CO.like_11	0.992556
Os_C2H2_37	Os_MYB_43	0.992553
Os_LBD_2	Os_MYB_related_10	0.992551
Os_41	Os_HD.ZIP_18	0.992543
Os_bZIP_47	Os_MYB_41	0.992541
Os_C2H2_38	Os_MYB_41	0.992536
Os_bZIP_15	Os_Dof_15	0.992535
Os_NAC_42	Os_NAC_7	0.992516
Os_48	Os_MYB_related_37	0.99251
Os_32	Os_54	0.99251
Os_MYB_41	Os_NAC_8	0.992505
Os_ARF_14	Os_MYB_related_37	0.992495
Os_12	Os_MYB_16	0.992492
Os_MYB_44	Os_MYB_45	0.992487
Os_CO.like_11	Os_ERF_33	0.992475
Os_MYB_44	Os_NAC_14	0.99247
Os_G2.like_27	Os_MYB_related_37	0.992465
Os_bZIP_49	Os_NAC_42	0.992462
Os_MYB_related_37	Os_NAC_17	0.99245
Os_C2H2_36	Os_MYB_41	0.992449
Os_29	Os_67	0.99244
Os_ARF_16	Os_HSF_16	0.992435
Os_ERF_3	Os_NAC_33	0.992431
Os_58	Os_MYB_related_2	0.992429
Os_67	Os_ZF.HD_1	0.99242
Os_Dof_15	Os_MYB_11	0.992418
Os_23	Os_62	0.992417
Os_Dof_13	Os_HSF_17	0.992416
Os_28	Os_67	0.9924
Os_bZIP_57	Os_C3H_22	0.992399
Os_NAC_42	Os_WRKY_22	0.992393
Os_ARF_16	Os_CO.like_11	0.992393
Os_48	Os_NAC_47	0.992393
Os_ERF_49	Os_NAC_40	0.992388
Os_bZIP_15	Os_HSF_5	0.992385
Os_C2H2_30	Os_C3H_15	0.992385
Os_62	Os_MYB_related_9	0.992381
Os_bZIP_4	Os_WRKY_52	0.99238
Os_G2.like_28	Os_Trihelix_3	0.99238
Os_1	Os_ARF_3	0.992379
Os_8	Os_TALE_3	0.992378
Os_G2.like_28	Os_NAC_14	0.992375
Os_21	Os_MYB_48	0.992374
Os_ARF_16	Os_WRKY_52	0.992371
Os_G2.like_28	Os_WRKY_58	0.99237
Os_21	Os_HD.ZIP_20	0.992348
Os_13	Os_NAC_33	0.992346
Os_13	Os_C2H2_36	0.992346
Os_bZIP_47	Os_WRKY_40	0.99234
Os_C2H2_37	Os_Trihelix_14	0.992337
Os_ERF_19	Os_MYB_related_11	0.992334
Os_C2H2_38	Os_G2.like_29	0.992334
Os_48	Os_MYB_45	0.99233
Os_ARF_14	Os_C3H_22	0.992327
Os_G2.like_28	Os_WRKY_46	0.99232
Os_C2H2_38	Os_MYB_11	0.992319
Os_bZIP_13	Os_MYB_46	0.992313
Os_58	Os_WRKY_58	0.992312
Os_MYB_related_36	Os_NAC_43	0.992306
Os_NAC_44	Os_WRKY_22	0.992305
Os_C3H_22	Os_HD.ZIP_18	0.992302
Os_13	Os_ARF_16	0.992296
Os_HSF_11	Os_NAC_40	0.992296
Os_C2H2_36	Os_MYB_45	0.992286
Os_5	Os_61	0.992286
Os_ERF_33	Os_WOX	0.992285
Os_C2H2_34	Os_G2.like_28	0.992285
Os_HD.ZIP_19	Os_MYB_11	0.99228
Os_ERF_49	Os_NAC_17	0.992275
Os_C3H_3	Os_ERF_1	0.992273
Os_31	Os_MYB_43	0.992269
Os_28	Os_29	0.99226
Os_20	Os_22	0.992254
Os_ARF_14	Os_WRKY_52	0.992254
Os_12	Os_TALE_1	0.992243
Os_ERF_1	Os_NAC_14	0.992241
Os_48	Os_MYB_28	0.992226
Os_21	Os_MYB_44	0.992222
Os_bZIP_38	Os_HB.other_5	0.992217
Os_bHLH_60	Os_Trihelix_14	0.992214
Os_21	Os_WRKY_22	0.992214
Os_C2H2_37	Os_MYB_44	0.992213
Os_ERF_33	Os_MYB_related_11	0.992208
Os_48	Os_bZIP_4	0.992205
Os_bHLH_12	Os_MYB_related_9	0.992204
Os_31	Os_MYB_44	0.992201
Os_MYB_related_36	Os_NAC_44	0.992201
Os_bZIP_13	Os_bZIP_53	0.992192
Os_bZIP_49	Os_NAC_40	0.992185
Os_bZIP_4	Os_G2.like_27	0.992181
Os_ERF_32	Os_HSF_11	0.992167
Os_58	Os_G2.like_27	0.992165
Os_C2H2_38	Os_G2.like_28	0.992163
Os_29	Os_62	0.99216
Os_CO.like_11	Os_NAC_17	0.992158
Os_41	Os_ERF_19	0.992148
Os_ARF_16	Os_bZIP_47	0.992147
Os_31	Os_NAC_31	0.992142
Os_MYB_related_9	Os_NF.YC_6	0.992141
Os_ERF_52	Os_HSF_18	0.992118
Os_MYB_related_27	Os_MYB_related_29	0.992117
Os_MYB_44	Os_WRKY_11	0.992114
Os_38	Os_MYB_27	0.992105
Os_31	Os_bZIP_13	0.992103
Os_ERF_20	Os_WRKY_32	0.992101
Os_MYB_44	Os_WRKY_46	0.992088
Os_ERF_45	Os_MYB_49	0.992086
Os_G2.like_27	Os_HD.ZIP_19	0.992076
Os_MYB_11	Os_MYB_45	0.992062
Os_G2.like_27	Os_MYB_41	0.992058
Os_32	Os_HSF_11	0.992058
Os_MYB_48	Os_NAC_33	0.992057
Os_MYB_11	Os_WRKY_52	0.992055
Os_ARF_16	Os_NAC_48	0.992051
Os_bZIP_4	Os_HSF_6	0.992042
Os_ARF_14	Os_bZIP_60	0.992039
Os_C2H2_38	Os_MYB_related_37	0.992037
Os_32	Os_WRKY_52	0.992012
Os_ARF_14	Os_NAC_48	0.992012
Os_Dof_13	Os_MYB_related_37	0.99201
Os_bZIP_63	Os_HSF_2	0.992005
Os_bZIP_60	Os_G2.like_28	0.992003
Os_53	Os_67	0.992
Os_C2H2_38	Os_HSF_2	0.99199
Os_bZIP_49	Os_MYB_48	0.991983
Os_C3H_21	Os_MYB_related_29	0.991975
Os_MYB_45	Os_WRKY_58	0.991973
Os_ARF_16	Os_bZIP_20	0.991967
Os_32	Os_MYB_48	0.991964
Os_58	Os_HSF_2	0.991963
Os_MYB_related_29	Os_WRKY_27	0.991949
Os_ERF_3	Os_NF.X1_2.1	0.991947
Os_NAC_47	Os_Trihelix_14	0.991944
Os_bZIP_63	Os_MYB_39	0.991932
Os_bZIP_60	Os_GRAS_17	0.99193
Os_C2H2_34	Os_NF.X1_2.1	0.991925
Os_NAC_31	Os_WRKY_22	0.991907
Os_NAC_42	Os_Trihelix_14	0.991906
Os_G2.like_5	Os_WRKY_27	0.9919
Os_ERF_49	Os_WRKY_27	0.991898
Os_bZIP_49	Os_C2H2_34	0.991897
Os_48	Os_G2.like_5	0.991894
Os_28	Os_C3H_5	0.991893
Os_C2H2_37	Os_NAC_14	0.991892
Os_13	Os_bZIP_47	0.99189
Os_HSF_1	Os_MYB_related_9	0.991874
Os_bZIP_63	Os_C3H_22	0.991873
Os_bZIP_20	Os_HSF_6	0.991873
Os_bZIP_49	Os_WRKY_46	0.991863
Os_HSF_16	Os_HSF_5	0.99186
Os_bHLH_20	Os_TALE_1	0.99186
Os_19	Os_MYB_related_17	0.991858
Os_58	Os_HD.ZIP_19	0.991857
Os_62	Os_bHLH_12	0.991857
Os_MYB_28	Os_WRKY_52	0.991856
Os_MYB_11	Os_NAC_40	0.991855
Os_bZIP_2	Os_bZIP_20	0.99185
Os_NAC_43	Os_Trihelix_14	0.991849
Os_HSF_2	Os_Trihelix_3	0.991845
Os_27	Os_bZIP_63	0.991839
Os_ARF_13	Os_bZIP_60	0.991839
Os_ERF_19	Os_MYB_11	0.991836
Os_ARF_14	Os_G2.like_28	0.991825
Os_bZIP_60	Os_Dof_13	0.991823
Os_bZIP_4	Os_bZIP_47	0.991819
Os_MYB_41	Os_NAC_33	0.991815
Os_ERF_3	Os_WRKY_22	0.991814
Os_NAC_7	Os_NF.X1_2.1	0.991806
Os_MYB_48	Os_NAC_44	0.991797
Os_MYB_41	Os_Trihelix_9	0.991792
Os_NAC_45	Os_NAC_8	0.991791
Os_NAC_42	Os_WRKY_58	0.991788
Os_C2H2_37	Os_WRKY_22	0.991786
Os_ARF_16	Os_bZIP_54	0.991769
Os_C3H_22	Os_HSF_6	0.991762
Os_ARR.B_4	Os_Dof_13	0.991758
Os_bZIP_11	Os_MYB_related_17	0.991756
Os_12	Os_MYB_related_9	0.991755
Os_bZIP_60	Os_WRKY_27	0.99175
Os_ARF_3	Os_G2.like_10	0.991741
Os_NAC_17	Os_NAC_33	0.991724
Os_HD.ZIP_19	Os_HSF_2	0.991722
Os_NAC_7	Os_WOX	0.991713
Os_G2.like_5	Os_MYB_43	0.991709
Os_CO.like_11	Os_Dof_15	0.9917
Os_ERF_43	Os_WRKY_46	0.991699
Os_C3H_22	Os_NF.X1_2.1	0.991696
Os_8	Os_G2.like_9	0.991693
Os_48	Os_bZIP_47	0.991691
Os_bZIP_37	Os_ERF_19	0.991685
Os_bZIP_60	Os_WRKY_52	0.991683
Os_bZIP_49	Os_WRKY_27	0.991668
Os_C2H2_34	Os_NAC_47	0.991666
Os_bZIP_53	Os_WRKY_11	0.991666
Os_NAC_14	Os_NAC_40	0.991665
Os_bZIP_17	Os_DBB_4	0.991658
Os_G2.like_28	Os_HSF_17	0.99165
Os_HSF_11	Os_WOX	0.991649
Os_bZIP_47	Os_MYB_related_29	0.991646
Os_HSF_17	Os_MYB_45	0.991643
Os_bZIP_49	Os_MYB_related_37	0.991643
Os_NAC_42	Os_NAC_8	0.991643
Os_ERF_45	Os_HSF_15	0.991624
Os_bZIP_15	Os_HSF_2	0.991624
Os_ARF_16	Os_C3H_21	0.991624
Os_ARF_7	Os_G2.like_15	0.991619
Os_bZIP_49	Os_ERF_33	0.991618
Os_CPP_6	Os_M.type_MADS_2	0.991606
Os_bZIP_13	Os_ERF_33	0.991591
Os_bZIP_47	Os_MYB_45	0.991585
Os_G2.like_29	Os_NAC_47	0.991567
Os_G2.like_28	Os_NF.X1_2.1	0.991565
Os_DBB_4	Os_NF.YC_6	0.991564
Os_CO.like_11	Os_CO.like_5	0.991541
Os_28	Os_TALE_1	0.99154
Os_ARF_14	Os_HSF_6	0.991536
Os_MYB_48	Os_NAC_14	0.991532
Os_Dof_15	Os_HD.ZIP_19	0.991527
Os_bZIP_15	Os_HSF_17	0.991519
Os_31	Os_MYB_46	0.991519
Os_bZIP_51	Os_C3H_3	0.991519
Os_bZIP_47	Os_WRKY_22	0.991515
Os_NAC_14	Os_WRKY_22	0.991511
Os_ERF_48	Os_NAC_40	0.991505
Os_13	Os_ARF_14	0.991503
Os_C2H2_37	Os_ERF_48	0.991499
Os_bZIP_37	Os_HSF_5	0.991493
Os_26	Os_28	0.991485
Os_NAC_47	Os_WRKY_22	0.991484
Os_HSF_5	Os_NAC_47	0.99148
Os_C3H_3	Os_NAC_7	0.99148
Os_ARF_3	Os_bZIP_24	0.991476
Os_ERF_49	Os_HSF_11	0.991475
Os_ERF_19	Os_NAC_47	0.991471
Os_bHLH_10	Os_MYB_43	0.991462
Os_bZIP_5	Os_bZIP_53	0.991451
Os_C3H_21	Os_NAC_33	0.991429
Os_ARF_16	Os_bZIP_57	0.991424
Os_ARF_16	Os_MYB_related_11	0.99142
Os_ARR.B_3	Os_C3H_21	0.991419
Os_MYB_44	Os_WRKY_52	0.991404
Os_MYB_44	Os_WRKY_27	0.991391
Os_MYB_related_11	Os_NAC_7	0.991391
Os_Dof_15	Os_MYB_39	0.99139
Os_bZIP_54	Os_C3H_21	0.991385
Os_48	Os_C2H2_36	0.99138
Os_C2H2_38	Os_WRKY_22	0.991373
Os_31	Os_C2H2_36	0.991361
Os_31	Os_NAC_40	0.991347
Os_ARF_13	Os_CO.like_5	0.991329
Os_bZIP_54	Os_bZIP_60	0.991309
Os_bZIP_63	Os_HSF_16	0.991303
Os_bZIP_54	Os_ERF_3	0.991302
Os_CO.like_11	Os_VOZ	0.991297
Os_bZIP_37	Os_NAC_7	0.991291
Os_MYB_related_37	Os_Trihelix_3	0.991291
Os_13	Os_NAC_17	0.99129
Os_MYB_related_11	Os_NAC_14	0.991285
Os_MYB_related_29	Os_WRKY_40	0.991284
Os_48	Os_ARF_16	0.991283
Os_C2H2_38	Os_NAC_7	0.991282
Os_ARF_14	Os_bZIP_54	0.991273
Os_C3H_5	Os_LBD_2	0.991272
Os_ARF_16	Os_ERF_33	0.991265
Os_16	Os_TALE_1	0.991261
Os_bZIP_4	Os_ERF_40	0.991252
Os_NAC_7	Os_Trihelix_14	0.991242
Os_38	Os_bZIP_15	0.991242
Os_ARR.B_4	Os_bZIP_60	0.991239
Os_ERF_33	Os_NAC_7	0.991238
Os_HD.ZIP_19	Os_WRKY_46	0.991226
Os_bZIP_49	Os_G2.like_5	0.99122
Os_bZIP_20	Os_WRKY_46	0.991214
Os_HSF_6	Os_MYB_related_11	0.991214
Os_bZIP_15	Os_HD.ZIP_19	0.991212
Os_bZIP_49	Os_bZIP_53	0.991211
Os_ERF_33	Os_NAC_17	0.991206
Os_58	Os_WRKY_52	0.991194
Os_NAC_1	Os_NAC_46	0.991194
Os_MYB_related_34	Os_WRKY_52	0.991193
Os_bZIP_47	Os_CO.like_11	0.991192
Os_MYB_44	Os_NAC_47	0.991191
Os_MYB_11	Os_MYB_44	0.991186
Os_bZIP_20	Os_WRKY_52	0.99117
Os_C3H_21	Os_ERF_33	0.991165
Os_12	Os_23	0.991164
Os_ERF_53	Os_MYB_49	0.991163
Os_ERF_46	Os_MYB_11	0.991161
Os_MYB_45	Os_NAC_33	0.991157
Os_58	Os_G2.like_28	0.991155
Os_29	Os_bZIP_17	0.991155
Os_bZIP_49	Os_Trihelix_14	0.991152
Os_bZIP_60	Os_MYB_related_37	0.99114
Os_28	Os_44	0.99114
Os_WRKY_27	Os_WRKY_52	0.991139
Os_CO.like_11	Os_MYB_46	0.991136
Os_41	Os_ERF_33	0.99113
Os_MYB_41	Os_NF.YB_5	0.991112
Os_21	Os_NF.X1_2.1	0.991102
Os_MYB_43	Os_NAC_47	0.991096
Os_bZIP_11	Os_NF.YC_6	0.991093
Os_13	Os_WRKY_46	0.99109
Os_ERF_19	Os_NF.X1_2.1	0.991084
Os_MYB_46	Os_WRKY_52	0.991078
Os_58	Os_MYB_11	0.991072
Os_ERF_46	Os_HD.ZIP_19	0.991072
Os_Trihelix_14	Os_WOX	0.991067
Os_bZIP_2	Os_HSF_2	0.991066
Os_MYB_41	Os_WRKY_22	0.991066
Os_G2.like_27	Os_WRKY_27	0.991058
Os_ARR.B_4	Os_MYB_related_29	0.991053
Os_13	Os_Dof_15	0.991039
Os_MYB_44	Os_NAC_7	0.991037
Os_1	Os_G2.like_10	0.991024
Os_bZIP_13	Os_C2H2_38	0.991023
Os_ARF_13	Os_ARF_16	0.991014
Os_HSF_5	Os_NAC_39	0.990985
Os_bZIP_47	Os_bZIP_54	0.990977
Os_G2.like_10	Os_MYB_related_10	0.990977
Os_NF.X1_2.1	Os_WRKY_22	0.990976
Os_G2.like_29	Os_WRKY_58	0.990976
Os_HSF_17	Os_WRKY_46	0.990976
Os_MYB_43	Os_NAC_17	0.990973
Os_NAC_14	Os_WRKY_58	0.990971
Os_bZIP_15	Os_MYB_41	0.990969
Os_C2H2_34	Os_MYB_44	0.990961
Os_ARF_16	Os_ERF_40	0.99096
Os_bZIP_17	Os_NF.YC_6	0.990955
Os_C3H_21	Os_GRAS_17	0.990952
Os_G2.like_5	Os_NAC_44	0.990944
Os_19	Os_44	0.99094
Os_31	Os_WRKY_52	0.990936
Os_NAC_31	Os_NAC_44	0.990936
Os_ERF_49	Os_NAC_42	0.99093
Os_MYB_41	Os_WRKY_46	0.990922
Os_MYB_44	Os_MYB_48	0.990919
Os_bZIP_4	Os_MYB_related_37	0.990918
Os_54	Os_SBP_6	0.990918
Os_NAC_44	Os_WRKY_55	0.990917
Os_bZIP_60	Os_C3H_21	0.990915
Os_58	Os_MYB_related_11	0.990912
Os_NAC_43	Os_WRKY_11	0.990911
Os_C2H2_39	Os_ERF_1	0.990908
Os_20	Os_67	0.990908
Os_bZIP_47	Os_G2.like_28	0.990907
Os_GATA_8	Os_M.type_MADS_2	0.990904
Os_HSF_5	Os_WRKY_46	0.990902
Os_bZIP_60	Os_NAC_33	0.990902
Os_G2.like_29	Os_HSF_2	0.990898
Os_bZIP_49	Os_G2.like_28	0.990895
Os_G2.like_29	Os_NAC_17	0.990895
Os_bZIP_4	Os_MYB_45	0.990893
Os_NAC_42	Os_WRKY_61	0.990892
Os_MYB_related_28	Os_MYB_related_29	0.990874
Os_1	Os_28	0.990869
Os_G2.like_29	Os_WRKY_11	0.990862
Os_bHLH_60	Os_bZIP_5	0.990852
Os_bZIP_49	Os_HSF_5	0.990852
Os_bZIP_13	Os_WOX	0.990846
Os_ARR.B_3	Os_C3H_20	0.990845
Os_MYB_46	Os_NAC_42	0.990841
Os_bZIP_4	Os_C2H2_34	0.99084
Os_31	Os_NAC_14	0.990837
Os_bZIP_20	Os_ERF_40	0.990832
Os_29	Os_MYB_related_17	0.990831
Os_bZIP_15	Os_WRKY_52	0.990826
Os_ARR.B_3	Os_MYB_28	0.990819
Os_WRKY_46	Os_WRKY_52	0.990819
Os_MYB_11	Os_MYB_related_37	0.990815
Os_B3_7	Os_MYB_related_33	0.990814
Os_Trihelix_12	Os_WRKY_63	0.990806
Os_CO.like_5	Os_ERF_3	0.990802
Os_12	Os_ZF.HD_2	0.990797
Os_DBB_6	Os_ZF.HD_3	0.990781
Os_ERF_49	Os_NAC_33	0.990779
Os_ERF_1	Os_ERF_19	0.990773
Os_31	Os_C2H2_38	0.990761
Os_5	Os_C3H_5	0.990753
Os_62	Os_MYB_related_17	0.990752
Os_HSF_11	Os_WRKY_22	0.990744
Os_bZIP_47	Os_G2.like_5	0.990741
Os_NAC_39	Os_NAC_47	0.990741
Os_bZIP_63	Os_C2H2_35	0.99074
Os_bZIP_49	Os_CO.like_11	0.990738
Os_MYB_related_29	Os_VOZ	0.990732
Os_bZIP_37	Os_bZIP_49	0.990726
Os_MYB_41	Os_WRKY_27	0.990713
Os_NAC_47	Os_WRKY_52	0.990713
Os_Dof_15	Os_WRKY_52	0.990712
Os_C2H2_34	Os_HD.ZIP_5	0.990709
Os_bZIP_60	Os_G2.like_27	0.990707
Os_16	Os_46	0.990697
Os_C3H_22	Os_G2.like_28	0.990697
Os_HSF_17	Os_MYB_related_11	0.990695
Os_41	Os_Dof_15	0.990695
Os_61	Os_MYB_related_10	0.990686
Os_31	Os_NAC_42	0.990676
Os_bZIP_53	Os_C2H2_37	0.990672
Os_ERF_49	Os_NAC_31	0.99067
Os_C2H2_10	Os_C2H2_11	0.990666
Os_ARF_16	Os_bZIP_15	0.990664
Os_28	Os_46	0.990662
Os_C3H_5	Os_MYB_16	0.99066
Os_46	Os_ZF.HD_1	0.990643
Os_MYB_11	Os_WRKY_11	0.990639
Os_bZIP_53	Os_NAC_31	0.990639
Os_bZIP_54	Os_HD.ZIP_19	0.990637
Os_ERF_49	Os_NAC_14	0.990629
Os_ARF_14	Os_bZIP_15	0.990628
Os_C3H_21	Os_WRKY_40	0.990628
Os_bZIP_4	Os_HSF_5	0.990626
Os_MYB_related_2	Os_WRKY_46	0.990623
Os_22	Os_TALE_1	0.990621
Os_58	Os_Trihelix_3	0.990605
Os_Dof_15	Os_ERF_19	0.990595
Os_16	Os_MYB_related_17	0.990594
Os_C2H2_34	Os_HSF_6	0.990591
Os_C3H_22	Os_MYB_related_37	0.99058
Os_bZIP_4	Os_HSF_16	0.990579
Os_CO.like_11	Os_ERF_19	0.990569
Os_C2H2_36	Os_ERF_46	0.990568
Os_bZIP_47	Os_MYB_related_34	0.990565
Os_C2H2_25	Os_ZF.HD_5	0.99056
Os_Dof_13	Os_G2.like_28	0.990558
Os_Dof_13	Os_MYB_45	0.990558
Os_bZIP_49	Os_ERF_3	0.990555
Os_bZIP_53	Os_NAC_47	0.990553
Os_C3H_22	Os_NAC_48	0.990547
Os_ERF_23	Os_HB.other_3	0.990542
Os_44	Os_MYB_related_9	0.99054
Os_53	Os_GRAS_6	0.990539
Os_G2.like_28	Os_NAC_8	0.990536
Os_bZIP_49	Os_G2.like_29	0.990533
Os_58	Os_C2H2_34	0.990525
Os_16	Os_NF.YB	0.990525
Os_ERF_46	Os_NAC_47	0.990516
Os_62	Os_C3H_5	0.990515
Os_MYB_45	Os_NAC_8	0.990512
Os_C2H2_35	Os_HSF_17	0.990509
Os_bZIP_37	Os_bZIP_53	0.990504
Os_MYB_45	Os_Trihelix_9	0.990504
Os_HSF_6	Os_MYB_related_37	0.990498
Os_NF.YB_5	Os_WRKY_52	0.990489
Os_ARF_13	Os_C3H_21	0.990487
Os_31	Os_48	0.990483
Os_HSF_2	Os_HSF_5	0.990478
Os_31	Os_C2H2_37	0.990474
Os_C2H2_34	Os_ERF_33	0.990472
Os_MYB_related_11	Os_Trihelix_3	0.990464
Os_ARF_16	Os_NAC_14	0.990463
Os_ERF_19	Os_MYB_46	0.990461
Os_WRKY_27	Os_WRKY_55	0.990457
Os_bZIP_49	Os_NAC_44	0.990437
Os_34	Os_NF.YB	0.990437
Os_MYB_45	Os_MYB_46	0.990436
Os_C2H2_38	Os_HSF_5	0.990435
Os_bZIP_49	Os_G2.like_27	0.990434
Os_ERF_40	Os_NAC_46	0.990427
Os_ERF_49	Os_MYB_44	0.990426
Os_bHLH_20	Os_NF.YB	0.990426
Os_22	Os_C2H2_9	0.990423
Os_57	Os_bHLH_20	0.99042
Os_bHLH_10	Os_bHLH_60	0.990415
Os_13	Os_bZIP_15	0.990412
Os_Dof_15	Os_NAC_47	0.990407
Os_C3H_22	Os_MYB_46	0.990407
Os_26	Os_TCP_1	0.990406
Os_MYB_48	Os_NF.X1_2.1	0.990393
Os_C3H_22	Os_ERF_19	0.990379
Os_C2H2_36	Os_HD.ZIP_19	0.990359
Os_27	Os_Dof_15	0.99035
Os_MYB_46	Os_MYB_related_11	0.990348
Os_bZIP_20	Os_Dof_15	0.990346
Os_bZIP_13	Os_NAC_14	0.990343
Os_C2H2_28	Os_MYB_27	0.990342
Os_bZIP_49	Os_C2H2_30	0.990342
Os_28	Os_MYB_16	0.990339
Os_ARR.B_4	Os_C3H_22	0.990335
Os_bZIP_13	Os_MYB_43	0.990334
Os_19	Os_20	0.990331
Os_MYB_41	Os_MYB_related_37	0.990329
Os_ERF_3	Os_ERF_49	0.990327
Os_19	Os_TALE_1	0.990322
Os_ARF_14	Os_bZIP_47	0.990322
Os_bHLH_10	Os_bZIP_53	0.990313
Os_G2.like_28	Os_NAC_17	0.990309
Os_bZIP_13	Os_WRKY_52	0.990308
Os_bZIP_47	Os_MYB_44	0.990302
Os_48	Os_MYB_48	0.990301
Os_bZIP_11	Os_DBB_6	0.990296
Os_bZIP_37	Os_NAC_40	0.990279
Os_Dof_15	Os_G2.like_27	0.990261
Os_bZIP_60	Os_NAC_48	0.990261
Os_bZIP_4	Os_MYB_41	0.99026
Os_bZIP_53	Os_MYB_43	0.99026
Os_bZIP_47	Os_NAC_17	0.990257
Os_C2H2_34	Os_Trihelix_3	0.990251
Os_5	Os_60	0.990249
Os_54	Os_bZIP_47	0.990247
Os_C2H2_37	Os_MYB_41	0.990243
Os_C2H2_28	Os_C3H_1	0.99024
Os_22	Os_NF.YB	0.990235
Os_ARR.B_4	Os_G2.like_28	0.990226
Os_G2.like_27	Os_WRKY_46	0.990222
Os_23	Os_46	0.990221
Os_ERF_3	Os_NAC_17	0.990221
Os_G2.like_28	Os_HSF_2	0.990217
Os_54	Os_NAC_31	0.990209
Os_27	Os_MYB_related_35	0.990206
Os_GRAS_6	Os_MYB_related_10	0.990206
Os_MYB_41	Os_NAC_47	0.990204
Os_ARF_16	Os_Trihelix_3	0.990203
Os_C2H2_36	Os_MYB_44	0.990203
Os_32	Os_MYB_43	0.990201
Os_ERF_33	Os_WRKY_52	0.990198
Os_MYB_39	Os_Trihelix_15	0.990195
Os_bZIP_20	Os_HSF_17	0.990192
Os_ERF_33	Os_NAC_40	0.990187
Os_31	Os_NAC_47	0.990183
Os_HD.ZIP_20	Os_MYB_44	0.990183
Os_bZIP_13	Os_bZIP_37	0.990179
Os_NAC_33	Os_NAC_43	0.990165
Os_13	Os_HSF_2	0.990157
Os_C2H2_37	Os_ERF_49	0.990157
Os_bZIP_54	Os_C3H_22	0.990154
Os_bHLH_60	Os_WRKY_22	0.990151
Os_HSF_5	Os_MYB_45	0.990145
Os_23	Os_MYB_16	0.990143
Os_G2.like_28	Os_MYB_39	0.990137
Os_bZIP_60	Os_C3H_22	0.990135
Os_31	Os_CO.like_5	0.990134
Os_Nin.like_4	Os_WRKY_22	0.990129
Os_C2H2_34	Os_HSF_5	0.990129
Os_ERF_49	Os_MYB_46	0.990126
Os_MYB_41	Os_NAC_45	0.990126
Os_13	Os_bZIP_49	0.99012
Os_C3H_15	Os_WRKY_40	0.990119
Os_bZIP_63	Os_MYB_45	0.990115
Os_Trihelix_3	Os_WRKY_58	0.990101
Os_NAC_17	Os_WRKY_27	0.990097
Os_CO.like_5	Os_NAC_33	0.990095
Os_20	Os_MYB_related_9	0.990094
Os_HSF_2	Os_WRKY_58	0.990094
Os_MYB_related_2	Os_NAC_8	0.990092
Os_23	Os_36	0.990081
Os_48	Os_ERF_3	0.99008
Os_26	Os_46	0.990077
Os_bZIP_13	Os_ERF_49	0.990076
Os_Dof_15	Os_HSF_5	0.990075
Os_C2H2_34	Os_MYB_related_37	0.990073
Os_MYB_48	Os_WRKY_61	0.990072
Os_ARF_14	Os_Dof_15	0.990072
Os_MYB_45	Os_NAC_47	0.990071
Os_48	Os_Trihelix_9	0.990071
Os_bZIP_24	Os_Nin.like_2	0.990066
Os_C2H2_38	Os_NAC_42	0.990063
Os_bZIP_11	Os_MYB_related_5	0.990061
Os_HSF_6	Os_MYB_11	0.990061
Os_bHLH_9	Os_MYB_12	0.99006
Os_Dof_15	Os_NAC_42	0.990055
Os_41	Os_NAC_14	0.990055
Os_Dof_15	Os_HSF_16	0.990053
Os_G2.like_28	Os_NAC_33	0.990053
Os_bZIP_37	Os_NAC_14	0.990053
Os_bHLH_11	Os_ERF_33	0.990052
Os_27	Os_MYB_39	0.990048
Os_34	Os_TALE_1	0.990041
Os_bZIP_24	Os_LBD_2	0.990038
Os_bZIP_5	Os_NAC_40	0.990033
Os_31	Os_MYB_11	0.990033
Os_ARR.B_3	Os_NAC_31	0.990019
Os_C3H_21	Os_SBP_6	0.990018
Os_ERF_3	Os_Nin.like_4	0.990016
Os_NAC_8	Os_WRKY_11	0.990011
Os_C2H2_30	Os_WRKY_52	0.990007
Os_ERF_32	Os_NAC_31	0.989998
Os_bZIP_54	Os_MYB_45	0.989997
Os_bZIP_24	Os_MYB_related_10	0.989991
Os_CO.like_11	Os_ERF_1	0.98999
Os_CO.like_11	Os_NAC_42	0.989983
Os_58	Os_SRS_2	0.989976
Os_32	Os_NAC_17	0.989974
Os_48	Os_C2H2_37	0.989968
Os_CO.like_11	Os_MYB_related_11	0.989967
Os_44	Os_bZIP_17	0.989962
Os_48	Os_C3H_21	0.989962
Os_MYB_45	Os_Trihelix_3	0.98996
Os_bZIP_5	Os_ERF_49	0.989958
Os_C3H_15	Os_MYB_related_29	0.989957
Os_27	Os_MYB_45	0.989952
Os_MYB_46	Os_MYB_related_37	0.98995
Os_bHLH_20	Os_DBB_4	0.989948
Os_ARR.B_4	Os_ERF_40	0.989946
Os_bZIP_37	Os_C2H2_37	0.989945
Os_MYB_46	Os_WRKY_46	0.989944
Os_bZIP_5	Os_MYB_43	0.989944
Os_bHLH_12	Os_bZIP_11	0.989942
Os_bZIP_57	Os_MYB_related_34	0.989927
Os_ERF_14	Os_WRKY_32	0.989923
Os_ERF_33	Os_MYB_46	0.989916
Os_HSF_6	Os_HSF_9	0.989913
Os_32	Os_NF.YB_5	0.989896
Os_bZIP_15	Os_HSF_16	0.989896
Os_NAC_47	Os_NAC_8	0.989893
Os_ERF_33	Os_NAC_47	0.989889
Os_G2.like_29	Os_NAC_42	0.989881
Os_48	Os_MYB_related_34	0.98988
Os_MYB_44	Os_NAC_44	0.989878
Os_29	Os_TALE_1	0.989873
Os_20	Os_MYB_16	0.989872
Os_28	Os_ARF_6	0.98987
Os_67	Os_C3H_5	0.98987
Os_C2H2_36	Os_Trihelix_14	0.989865
Os_bZIP_60	Os_VOZ	0.989862
Os_HD.ZIP_19	Os_HSF_6	0.989856
Os_C2H2_38	Os_ERF_49	0.989851
Os_28	Os_NF.YB_2	0.989847
Os_41	Os_HSF_17	0.989846
Os_31	Os_C3H_21	0.989846
Os_C2H2_34	Os_ERF_3	0.989844
Os_ARF_16	Os_MYB_related_34	0.989837
Os_G2.like_5	Os_MYB_41	0.989837
Os_MYB_48	Os_WRKY_27	0.989829
Os_C2H2_36	Os_NAC_40	0.989825
Os_ARF_3	Os_C3H_5	0.989819
Os_CO.like_11	Os_WRKY_22	0.989812
Os_5	Os_ARF_3	0.989812
Os_C2H2_36	Os_WRKY_58	0.989812
Os_13	Os_bZIP_20	0.989804
Os_bZIP_49	Os_WRKY_58	0.9898
Os_HSF_17	Os_MYB_39	0.989795
Os_Trihelix_3	Os_WRKY_46	0.989792
Os_44	Os_TCP_1	0.989787
Os_ERF_18	Os_WRKY_9	0.989778
Os_41	Os_NAC_7	0.989774
Os_HSF_11	Os_Trihelix_14	0.989771
Os_22	Os_MYB_related_9	0.98977
Os_C3H_22	Os_MYB_11	0.989765
Os_bZIP_15	Os_bZIP_2	0.98976
Os_NAC_42	Os_NAC_47	0.989759
Os_MYB_28	Os_NAC_31	0.989756
Os_HSF_5	Os_MYB_11	0.989756
Os_C2H2_36	Os_MYB_related_37	0.989747
Os_MYB_44	Os_NF.X1_2.1	0.989746
Os_CO.like_11	Os_MYB_48	0.989746
Os_43	Os_MYB_related_29	0.989742
Os_ERF_40	Os_G2.like_27	0.98974
Os_HD.ZIP_19	Os_HSF_17	0.989739
Os_C3H_22	Os_Dof_13	0.989738
Os_bZIP_53	Os_MYB_48	0.989737
Os_ERF_49	Os_MYB_43	0.989734
Os_ARF_16	Os_bZIP_49	0.989733
Os_ARR.B_4	Os_MYB_related_27	0.989707
Os_31	Os_MYB_41	0.989702
Os_21	Os_G2.like_28	0.989701
Os_53	Os_MYB_related_10	0.989699
Os_31	Os_WOX	0.989697
Os_CO.like_11	Os_HD.ZIP_20	0.989693
Os_NAC_17	Os_NF.X1_2.1	0.989689
Os_31	Os_CO.like_11	0.989685
Os_31	Os_VOZ	0.989684
Os_13	Os_58	0.98968
Os_ERF_19	Os_MYB_6	0.98968
Os_bZIP_54	Os_MYB_related_37	0.989679
Os_34	Os_bHLH_12	0.989666
Os_ERF_53	Os_HSF_15	0.989663
Os_MYB_16	Os_NF.YB	0.989661
Os_bZIP_51	Os_NAC_42	0.98966
Os_ERF_19	Os_NAC_17	0.989656
Os_G2.like_27	Os_NAC_33	0.989654
Os_bZIP_13	Os_HSF_11	0.989653
Os_bZIP_53	Os_NAC_7	0.989653
Os_C2H2_30	Os_NAC_8	0.989652
Os_CPP_6	Os_GATA_8	0.989647
Os_ERF_3	Os_WRKY_52	0.989647
Os_NAC_17	Os_WRKY_46	0.989641
Os_C2H2_37	Os_NAC_8	0.989639
Os_HD.ZIP_20	Os_Trihelix_3	0.989639
Os_MYB_related_37	Os_WRKY_58	0.989637
Os_13	Os_C2H2_38	0.989632
Os_bZIP_13	Os_WRKY_22	0.989629
Os_G2.like_29	Os_SRS_2	0.989628
Os_1	Os_62	0.989626
Os_bZIP_57	Os_WRKY_47	0.989623
Os_MYB_48	Os_NAC_40	0.989617
Os_CPP_7	Os_GRAS_1	0.989614
Os_C2H2_38	Os_MYB_48	0.98961
Os_ERF_49	Os_WRKY_61	0.989607
Os_bZIP_4	Os_NAC_33	0.989606
Os_58	Os_NAC_47	0.989595
Os_GATA_8	Os_NAC_31	0.989593
Os_MYB_related_2	Os_NAC_45	0.989592
Os_ERF_49	Os_NAC_7	0.98959
Os_53	Os_MYB_related_15	0.989588
Os_28	Os_ZF.HD_1	0.989585
Os_C3H_1	Os_ERF_4	0.989583
Os_21	Os_G2.like_5	0.989581
Os_bZIP_51	Os_WRKY_32	0.989579
Os_16	Os_22	0.989578
Os_48	Os_bZIP_13	0.989572
Os_C3H_15	Os_WRKY_27	0.989571
Os_bZIP_49	Os_NF.X1_2.1	0.989567
Os_ARF_14	Os_MYB_45	0.989565
Os_63	Os_MYB_related_9	0.989563
Os_C2H2_34	Os_HSF_17	0.98955
Os_bZIP_60	Os_CO.like_11	0.98955
Os_MYB_related_2	Os_SRS_2	0.989545
Os_ARF_13	Os_G2.like_5	0.989542
Os_MYB_43	Os_MYB_related_36	0.98954
Os_ARF_7	Os_bZIP_11	0.989538
Os_bZIP_47	Os_MYB_related_37	0.989537
Os_HSF_5	Os_MYB_related_11	0.989537
Os_Dof_15	Os_NAC_7	0.989537
Os_bZIP_63	Os_C2H2_34	0.98953
Os_48	Os_WRKY_11	0.98953
Os_ERF_10	Os_HSF_17	0.989525
Os_ERF_3	Os_HSF_6	0.989524
Os_36	Os_MYB_related_9	0.989521
Os_58	Os_HSF_17	0.989517
Os_ARF_16	Os_HD.ZIP_20	0.989508
Os_23	Os_8	0.989506
Os_5	Os_LBD_2	0.989485
Os_E2F.DP_4	Os_NAC_2	0.989465
Os_bHLH_11	Os_bZIP_54	0.989461
Os_32	Os_bZIP_53	0.989459
Os_C3H_21	Os_MYB_28	0.989453
Os_1	Os_5	0.989451
Os_31	Os_ERF_33	0.989449
Os_ARR.B_4	Os_NF.X1_2.1	0.989448
Os_C3H_22	Os_GRAS_17	0.989448
Os_ARF_14	Os_bZIP_63	0.989445
Os_bZIP_63	Os_MYB_related_11	0.989444
Os_C3H_24	Os_HSF_18	0.989444
Os_41	Os_MYB_11	0.989441
Os_31	Os_HSF_11	0.989432
Os_34	Os_bHLH_20	0.98943
Os_NAC_7	Os_WRKY_22	0.989429
Os_C2H2_30	Os_WRKY_27	0.98942
Os_bZIP_63	Os_G2.like_7	0.98942
Os_ERF_49	Os_G2.like_5	0.989413
Os_C2H2_30	Os_NAC_44	0.989413
Os_HSF_2	Os_NAC_17	0.989406
Os_ARF_16	Os_NAC_17	0.989402
Os_C2H2_38	Os_G2.like_5	0.989399
Os_Dof_13	Os_HSF_16	0.989398
Os_ERF_33	Os_ERF_49	0.989398
Os_41	Os_MYB_46	0.989396
Os_13	Os_MYB_11	0.989394
Os_C3H_21	Os_HSF_6	0.98939
Os_bZIP_4	Os_C3H_21	0.989387
Os_16	Os_ZF.HD_1	0.989382
Os_34	Os_HD.ZIP_9	0.989381
Os_bZIP_4	Os_G2.like_28	0.989379
Os_C3H_21	Os_WRKY_52	0.989369
Os_HD.ZIP_20	Os_WRKY_58	0.98936
Os_C3H_22	Os_Trihelix_3	0.989359
Os_32	Os_C3H_21	0.989358
Os_ERF_46	Os_HSF_2	0.989353
Os_CO.like_11	Os_WRKY_27	0.989352
Os_C3H_22	Os_NAC_17	0.989346
Os_Dof_13	Os_G2.like_27	0.989337
Os_ERF_43	Os_Trihelix_9	0.989333
Os_8	Os_MYB_related_17	0.989329
Os_GATA_8	Os_MYB_related_36	0.989326
Os_bZIP_5	Os_WRKY_22	0.98932
Os_bZIP_60	Os_MYB_44	0.989317
Os_31	Os_bHLH_60	0.989315
Os_ERF_19	Os_HD.ZIP_18	0.989313
Os_C2H2_36	Os_MYB_43	0.989306
Os_bZIP_47	Os_C2H2_38	0.9893
Os_54	Os_NAC_33	0.9893
Os_20	Os_NF.YC_6	0.989299
Os_19	Os_bHLH_20	0.989291
Os_MYB_44	Os_NAC_33	0.98929
Os_bZIP_61	Os_HSF_15	0.98929
Os_bZIP_2	Os_bZIP_63	0.989286
Os_NAC_14	Os_NAC_8	0.989285
Os_bZIP_20	Os_Dof_13	0.989285
Os_C2H2_30	Os_NAC_33	0.989284
Os_bHLH_20	Os_bZIP_29	0.989281
Os_bZIP_63	Os_WRKY_46	0.989281
Os_MYB_44	Os_WRKY_61	0.989275
Os_27	Os_G2.like_28	0.989271
Os_bZIP_63	Os_HD.ZIP_20	0.989261
Os_48	Os_G2.like_28	0.98926
Os_12	Os_29	0.989256
Os_AP2_2	Os_bHLH_25	0.989255
Os_NAC_31	Os_WRKY_27	0.989254
Os_62	Os_TALE_1	0.989247
Os_ARF_16	Os_HSF_2	0.989245
Os_ERF_49	Os_NAC_47	0.989244
Os_27	Os_58	0.989243
Os_34	Os_MYB_related_17	0.98924
Os_48	Os_bZIP_60	0.989239
Os_G2.like_28	Os_NAC_42	0.989236
Os_CO.like_11	Os_MYB_11	0.989234
Os_ERF_48	Os_NAC_47	0.989227
Os_MYB_related_15	Os_NF.YB_2	0.989227
Os_C2H2_6	Os_G2.like_10	0.98922
Os_21	Os_ERF_49	0.989219
Os_21	Os_NAC_42	0.989214
Os_MYB_44	Os_NAC_45	0.989211
Os_C3H_22	Os_HD.ZIP_5	0.989211
Os_ERF_1	Os_NAC_42	0.989208
Os_31	Os_WRKY_40	0.989204
Os_ERF_3	Os_G2.like_28	0.989203
Os_GRAS_17	Os_VOZ	0.989199
Os_MYB_11	Os_Trihelix_14	0.989198
Os_G2.like_29	Os_WRKY_46	0.989193
Os_GATA_8	Os_WRKY_52	0.989186
Os_bZIP_13	Os_ERF_46	0.989179
Os_13	Os_HSF_6	0.989174
Os_bZIP_15	Os_bZIP_63	0.989174
Os_C2H2_37	Os_WRKY_52	0.989171
Os_25	Os_61	0.989171
Os_C3H_21	Os_G2.like_27	0.989167
Os_C2H2_36	Os_NAC_33	0.989152
Os_C2H2_34	Os_C2H2_37	0.989147
Os_ARF_13	Os_NAC_14	0.989147
Os_C2H2_9	Os_TALE_1	0.989142
Os_C2H2_36	Os_Dof_15	0.989142
Os_ERF_3	Os_MYB_48	0.989139
Os_C3H_21	Os_MYB_related_28	0.989136
Os_bZIP_54	Os_MYB_11	0.989135
Os_CO.like_2	Os_MYB_related_5	0.989132
Os_bZIP_49	Os_HSF_2	0.989126
Os_bZIP_5	Os_Trihelix_14	0.989124
Os_ERF_46	Os_HSF_16	0.989122
Os_ERF_19	Os_ERF_33	0.98912
Os_LBD_6	Os_WRKY_51	0.989103
Os_MYB_related_11	Os_NF.X1_2.1	0.989097
Os_48	Os_MYB_44	0.989093
Os_ARF_16	Os_MYB_11	0.989091
Os_bZIP_2	Os_Dof_15	0.98909
Os_CO.like_11	Os_GRAS_17	0.989089
Os_G2.like_27	Os_MYB_related_11	0.989089
Os_bZIP_15	Os_bZIP_4	0.989087
Os_12	Os_bHLH_12	0.989086
Os_32	Os_Trihelix_14	0.989086
Os_48	Os_bZIP_54	0.989076
Os_C3H_5	Os_MYB_related_10	0.989073
Os_CO.like_11	Os_NAC_7	0.989069
Os_27	Os_WRKY_58	0.989065
Os_bZIP_15	Os_G2.like_28	0.98906
Os_ERF_19	Os_HSF_5	0.989058
Os_32	Os_C3H_15	0.989052
Os_bZIP_51	Os_bZIP_53	0.989042
Os_ARF_13	Os_Dof_15	0.989041
Os_13	Os_HSF_16	0.989041
Os_19	Os_ZF.HD_2	0.98904
Os_MYB_related_27	Os_WRKY_40	0.989031
Os_ARF_14	Os_ARR.B_4	0.98903
Os_ARF_16	Os_C2H2_38	0.989028
Os_ARF_13	Os_C2H2_34	0.989023
Os_ERF_43	Os_MYB_45	0.989021
Os_ERF_47	Os_Trihelix_3	0.989016
Os_bHLH_60	Os_MYB_43	0.989013
Os_Dof_15	Os_G2.like_29	0.989004
Os_bZIP_49	Os_C3H_22	0.98899
Os_ARF_7	Os_HSF_1	0.988989
Os_GATA_8	Os_MYB_28	0.988988
Os_bZIP_49	Os_MYB_43	0.988986
Os_bHLH_60	Os_ERF_32	0.988983
Os_MYB_45	Os_WRKY_27	0.988982
Os_DBB_4	Os_TCP_1	0.988981
Os_C2H2_37	Os_NAC_42	0.988977
Os_26	Os_ZF.HD_1	0.988977
Os_WOX	Os_WRKY_22	0.988977
Os_19	Os_62	0.988969
Os_C2H2_38	Os_NAC_40	0.988965
Os_ARR.B_4	Os_MYB_related_11	0.988963
Os_C2H2_32	Os_WRKY_51	0.988963
Os_HD.ZIP_20	Os_NF.X1_2.1	0.988962
Os_NAC_44	Os_Trihelix_14	0.988959
Os_31	Os_ARF_13	0.988956
Os_NAC_8	Os_WRKY_27	0.988956
Os_HSF_2	Os_SRS_2	0.988947
Os_HSF_16	Os_WRKY_46	0.988947
Os_bZIP_37	Os_ERF_33	0.988946
Os_B3_3	Os_MYB_related_5	0.988944
Os_MYB_related_37	Os_NAC_33	0.988943
Os_58	Os_C2H2_36	0.98893
Os_ARF_16	Os_HD.ZIP_19	0.98892
Os_HSF_12	Os_WRKY_33	0.988916
Os_C3H_21	Os_MYB_related_27	0.988915
Os_Trihelix_9	Os_WRKY_46	0.988911
Os_19	Os_26	0.988908
Os_NAC_14	Os_Trihelix_14	0.988906
Os_MYB_46	Os_Trihelix_14	0.988903
Os_ARF_13	Os_NAC_17	0.988901
Os_C3H_22	Os_NAC_7	0.9889
Os_HSF_16	Os_HSF_6	0.988897
Os_ARR.B_4	Os_WRKY_40	0.988895
Os_GATA_8	Os_MYB_41	0.988891
Os_HSF_2	Os_WRKY_52	0.988888
Os_MYB_43	Os_WRKY_63	0.988882
Os_HSF_2	Os_NAC_47	0.988876
Os_bZIP_20	Os_MYB_related_11	0.98887
Os_ARF_13	Os_WRKY_22	0.988869
Os_bHLH_50	Os_C3H_20	0.988864
Os_bHLH_60	Os_WRKY_11	0.988861
Os_ERF_48	Os_NAC_7	0.988859
Os_bZIP_47	Os_NAC_44	0.988858
Os_MYB_related_9	Os_ZF.HD_2	0.988856
Os_1	Os_61	0.988855
Os_27	Os_HSF_17	0.988852
Os_bZIP_37	Os_MYB_11	0.988851
Os_12	Os_26	0.988845
Os_ERF_46	Os_HSF_5	0.988841
Os_48	Os_NAC_40	0.988839
Os_13	Os_G2.like_28	0.988839
Os_bZIP_57	Os_MYB_related_11	0.988834
Os_21	Os_Nin.like_4	0.988833
Os_MYB_related_37	Os_NAC_14	0.988829
Os_27	Os_HD.ZIP_20	0.988828
Os_bZIP_24	Os_C3H_5	0.988825
Os_bZIP_37	Os_WOX	0.988822
Os_NAC_8	Os_WRKY_22	0.988814
Os_21	Os_ERF_3	0.988811
Os_C3H_21	Os_WRKY_22	0.988811
Os_19	Os_28	0.988811
Os_48	Os_G2.like_29	0.988809
Os_MYB_related_37	Os_NAC_47	0.988808
Os_MYB_related_28	Os_WRKY_27	0.988807
Os_MYB_11	Os_MYB_41	0.988805
Os_C2H2_37	Os_G2.like_29	0.988803
Os_ERF_33	Os_NF.X1_2.1	0.988803
Os_C2H2_34	Os_HD.ZIP_18	0.988802
Os_bZIP_48	Os_bZIP_57	0.988797
Os_C2H2_30	Os_C2H2_38	0.98879
Os_NAC_33	Os_Nin.like_4	0.988787
Os_G2.like_27	Os_WRKY_40	0.988777
Os_31	Os_MYB_related_36	0.988773
Os_Dof_15	Os_HD.ZIP_20	0.988772
Os_bZIP_20	Os_bZIP_47	0.988771
Os_C2H2_37	Os_ERF_46	0.988769
Os_HD.ZIP_5	Os_NAC_7	0.988762
Os_G2.like_5	Os_NAC_17	0.988752
Os_41	Os_ARF_2	0.98875
Os_MYB_48	Os_NAC_47	0.988746
Os_44	Os_62	0.988737
Os_WRKY_22	Os_WRKY_52	0.988735
Os_43	Os_ARR.B_4	0.988733
Os_24	Os_bZIP_23	0.988727
Os_WRKY_11	Os_WRKY_58	0.98872
Os_ERF_1	Os_Trihelix_14	0.988719
Os_bZIP_20	Os_MYB_41	0.988716
Os_21	Os_NAC_14	0.988714
Os_32	Os_C2H2_38	0.988712
Os_bZIP_15	Os_bZIP_49	0.988712
Os_GRAS_17	Os_WOX	0.988707
Os_HSF_9	Os_MYB_related_34	0.988705
Os_34	Os_44	0.988702
Os_HSF_5	Os_NAC_8	0.9887
Os_32	Os_MYB_44	0.988698
Os_bZIP_49	Os_HSF_6	0.988693
Os_WRKY_22	Os_WRKY_61	0.988688
Os_HSF_2	Os_MYB_46	0.988687
Os_ARR.B_4	Os_bZIP_4	0.988682
Os_HSF_5	Os_MYB_related_37	0.988679
Os_C2H2_37	Os_HSF_5	0.98867
Os_C3H_3	Os_MYB_6	0.98867
Os_WOX	Os_WRKY_11	0.988658
Os_bZIP_20	Os_HSF_2	0.988658
Os_C2H2_35	Os_MYB_39	0.988657
Os_C2H2_38	Os_G2.like_27	0.988655
Os_Dof_13	Os_HD.ZIP_20	0.988653
Os_GATA_8	Os_NAC_33	0.988652
Os_MYB_related_11	Os_NAC_17	0.98865
Os_bZIP_47	Os_SBP_6	0.988643
Os_HSF_2	Os_MYB_related_35	0.988635
Os_bZIP_47	Os_NAC_8	0.988632
Os_12	Os_44	0.988626
Os_C2H2_30	Os_MYB_related_36	0.988624
Os_ERF_49	Os_NF.X1_2.1	0.988618
Os_bHLH_60	Os_NAC_43	0.988618
Os_ERF_10	Os_HD.ZIP_5	0.988611
Os_G2.like_29	Os_Trihelix_9	0.988609
Os_ERF_1	Os_WOX	0.988606
Os_C2H2_34	Os_MYB_45	0.988605
Os_G2.like_5	Os_MYB_related_36	0.988605
Os_NF.X1_2.1	Os_VOZ	0.988604
Os_19	Os_DBB_4	0.988602
Os_NAC_33	Os_VOZ	0.988597
Os_CO.like_11	Os_MYB_related_37	0.988594
Os_MYB_46	Os_WRKY_22	0.988589
Os_G2.like_27	Os_MYB_44	0.988589
Os_ARF_13	Os_C2H2_38	0.988589
Os_bZIP_47	Os_C3H_15	0.988583
Os_C2H2_39	Os_MYB_48	0.988578
Os_ARF_14	Os_HSF_17	0.988577
Os_48	Os_NAC_14	0.98857
Os_M.type_MADS_2	Os_WRKY_57	0.98857
Os_G2.like_5	Os_MYB_44	0.988563
Os_bHLH_50	Os_NAC_31	0.988556
Os_bZIP_60	Os_ERF_33	0.988554
Os_21	Os_bZIP_60	0.98855
Os_G2.like_5	Os_NAC_31	0.988549
Os_MYB_45	Os_NAC_14	0.98854
Os_G2.like_28	Os_MYB_46	0.988533
Os_bZIP_49	Os_C3H_21	0.988531
Os_C2H2_38	Os_NAC_18	0.988528
Os_63	Os_bZIP_11	0.988528
Os_bZIP_54	Os_GRAS_17	0.988524
Os_C3H_3	Os_ERF_19	0.98852
Os_C2H2_35	Os_G2.like_28	0.988515
Os_C3H_22	Os_G2.like_27	0.988513
Os_G2.like_29	Os_MYB_48	0.988512
Os_HSF_16	Os_Trihelix_3	0.988508
Os_48	Os_GATA_8	0.988507
Os_TALE_1	Os_ZF.HD_2	0.988498
Os_C2H2_9	Os_G2.like_15	0.988498
Os_48	Os_Nin.like_4	0.98849
Os_58	Os_NAC_42	0.988488
Os_ARR.B_4	Os_HD.ZIP_20	0.988484
Os_bZIP_2	Os_MYB_related_37	0.988481
Os_ARF_13	Os_NF.X1_2.1	0.988481
Os_bZIP_53	Os_NAC_17	0.988478
Os_bHLH_10	Os_NAC_40	0.988475
Os_C2H2_38	Os_CO.like_11	0.988474
Os_HSF_16	Os_NAC_46	0.988461
Os_MYB_related_34	Os_NAC_33	0.988452
Os_C2H2_36	Os_NAC_7	0.988448
Os_58	Os_ARF_16	0.988446
Os_MYB_related_29	Os_MYB_related_31	0.988435
Os_NF.YB	Os_ZF.HD_1	0.988426
Os_bZIP_47	Os_HSF_6	0.988426
Os_48	Os_HSF_6	0.988425
Os_bZIP_20	Os_bZIP_63	0.988423
Os_bZIP_11	Os_NF.YB	0.988422
Os_13	Os_MYB_28	0.988421
Os_ARF_13	Os_ARF_14	0.98842
Os_C2H2_37	Os_MYB_48	0.988417
Os_MYB_related_17	Os_ZF.HD_2	0.988417
Os_G2.like_27	Os_G2.like_28	0.988416
Os_C2H2_34	Os_HSF_2	0.988405
Os_bZIP_47	Os_ERF_49	0.988403
Os_C3H_22	Os_HD.ZIP_20	0.988403
Os_bZIP_20	Os_bZIP_49	0.98839
Os_21	Os_31	0.988388
Os_C2H2_37	Os_NAC_39	0.988378
Os_ARF_16	Os_HD.ZIP_18	0.988372
Os_DBB_4	Os_TALE_3	0.988363
Os_ARF_2	Os_MYB_related_11	0.988361
Os_C3H_22	Os_MYB_related_34	0.98836
Os_28	Os_ZF.HD_2	0.988357
Os_bZIP_4	Os_NAC_47	0.988356
Os_54	Os_NF.YB_5	0.988353
Os_ARF_14	Os_MYB_related_11	0.988352
Os_HSF_17	Os_NAC_14	0.988348
Os_bZIP_49	Os_HSF_11	0.988343
Os_ERF_1	Os_NAC_40	0.988341
Os_41	Os_CO.like_11	0.98834
Os_48	Os_ERF_33	0.988339
Os_ARF_14	Os_Dof_13	0.988337
Os_ERF_3	Os_HD.ZIP_20	0.988332
Os_GRAS_6	Os_NF.YB_2	0.988331
Os_MYB_39	Os_WRKY_58	0.98833
Os_ARF_14	Os_HD.ZIP_20	0.988328
Os_Dof_13	Os_Dof_15	0.988325
Os_ARR.B_3	Os_ERF_3	0.988325
Os_12	Os_NF.YB_2	0.988324
Os_MYB_43	Os_NAC_44	0.988323
Os_32	Os_ERF_3	0.988315
Os_ARF_13	Os_MYB_44	0.988314
Os_bZIP_5	Os_NAC_43	0.98831
Os_ERF_47	Os_MYB_42	0.988307
Os_NAC_2	Os_NAC_31	0.988304
Os_48	Os_ARF_14	0.988304
Os_13	Os_bZIP_4	0.988299
Os_MYB_46	Os_NAC_40	0.988295
Os_ARF_16	Os_NF.X1_2.1	0.988295
Os_HSF_6	Os_MYB_28	0.988292
Os_MYB_44	Os_MYB_related_37	0.988289
Os_bZIP_54	Os_NAC_33	0.988286
Os_MYB_46	Os_NAC_33	0.988285
Os_CO.like_11	Os_Dof_13	0.988284
Os_ARF_13	Os_G2.like_27	0.988283
Os_32	Os_C2H2_36	0.988272
Os_C2H2_34	Os_NAC_8	0.988264
Os_58	Os_bZIP_63	0.988263
Os_Dof_15	Os_NF.X1_2.1	0.988262
Os_C3H_22	Os_MYB_45	0.988255
Os_13	Os_WRKY_27	0.988255
Os_NAC_31	Os_WRKY_55	0.98825
Os_MYB_28	Os_NF.YB_5	0.988249
Os_1	Os_GRAS_6	0.988245
Os_MYB_28	Os_NAC_33	0.988245
Os_MYB_related_34	Os_NAC_17	0.988238
Os_bHLH_11	Os_MYB_related_34	0.988235
Os_MYB_48	Os_WRKY_58	0.988232
Os_ARR.B_4	Os_bZIP_20	0.98823
Os_bHLH_11	Os_HSF_9	0.98823
Os_ERF_3	Os_WOX	0.98822
Os_bZIP_63	Os_CO.like_11	0.988217
Os_bZIP_5	Os_WOX	0.988205
Os_48	Os_MYB_11	0.988205
Os_22	Os_MYB_related_17	0.988203
Os_ERF_19	Os_Trihelix_3	0.988195
Os_38	Os_SRS_2	0.988195
Os_32	Os_MYB_28	0.988193
Os_HSF_17	Os_HSF_5	0.988192
Os_MYB_11	Os_WRKY_58	0.988183
Os_28	Os_MYB_related_9	0.988181
Os_ERF_4	Os_NAC_1	0.988175
Os_HD.ZIP_18	Os_NAC_7	0.988174
Os_43	Os_MYB_related_31	0.988173
Os_G2.like_28	Os_G2.like_29	0.988171
Os_28	Os_DBB_4	0.988167
Os_ARF_13	Os_MYB_48	0.988165
Os_bZIP_15	Os_MYB_related_11	0.988161
Os_ARR.B_3	Os_MYB_related_29	0.988156
Os_31	Os_bZIP_60	0.988155
Os_58	Os_NAC_14	0.988153
Os_ERF_19	Os_HSF_17	0.988152
Os_C3H_15	Os_MYB_41	0.988146
Os_NAC_14	Os_WOX	0.988144
Os_C2H2_35	Os_Trihelix_3	0.988144
Os_G2.like_29	Os_NAC_14	0.988143
Os_C2H2_36	Os_HSF_2	0.988141
Os_21	Os_NAC_44	0.988134
Os_MYB_41	Os_WRKY_40	0.988131
Os_26	Os_NF.YC_6	0.98813
Os_ARF_13	Os_MYB_46	0.988127
Os_44	Os_bHLH_20	0.988121
Os_ARF_14	Os_ERF_3	0.98812
Os_bZIP_15	Os_MYB_related_35	0.988118
Os_HD.ZIP_20	Os_NAC_14	0.988118
Os_MYB_related_11	Os_MYB_related_37	0.98811
Os_bHLH_59	Os_MYB_40	0.98811
Os_MYB_related_29	Os_WRKY_55	0.98811
Os_ARF_14	Os_Nin.like_4	0.988108
Os_HSF_16	Os_MYB_11	0.988108
Os_NAC_17	Os_NAC_44	0.988106
Os_bHLH_20	Os_GATA_3	0.9881
Os_ERF_43	Os_SRS_2	0.9881
Os_G2.like_29	Os_NAC_8	0.988098
Os_C2H2_36	Os_WRKY_46	0.988097
Os_C3H_3	Os_WRKY_9	0.988094
Os_ERF_32	Os_M.type_MADS_2	0.988091
Os_NAC_31	Os_NF.YB_5	0.988089
Os_C2H2_36	Os_WRKY_22	0.988078
Os_bZIP_49	Os_MYB_related_34	0.988075
Os_31	Os_NAC_8	0.988073
Os_bZIP_53	Os_NAC_44	0.988072
Os_48	Os_G2.like_27	0.988069
Os_bZIP_17	Os_MYB_12	0.988069
Os_31	Os_GRAS_17	0.988058
Os_48	Os_ERF_49	0.988043
Os_NAC_3	Os_NAC_31	0.988038
Os_G2.like_27	Os_MYB_related_34	0.988037
Os_58	Os_bZIP_4	0.988036
Os_bZIP_15	Os_Trihelix_3	0.988035
Os_HSF_5	Os_MYB_44	0.988035
Os_26	Os_MYB_related_9	0.988034
Os_NF.X1_2.1	Os_WRKY_61	0.988034
Os_G2.like_28	Os_WRKY_52	0.988026
Os_MYB_46	Os_NF.X1_2.1	0.988017
Os_C2H2_30	Os_C2H2_36	0.988004
Os_bZIP_57	Os_NAC_48	0.988004
Os_13	Os_ARF_13	0.988002
Os_HD.ZIP_20	Os_MYB_45	0.987998
Os_32	Os_WRKY_40	0.987997
Os_9	Os_WRKY_34	0.987994
Os_MYB_39	Os_WRKY_46	0.987991
Os_23	Os_NF.YC_6	0.987987
Os_HD.ZIP_19	Os_MYB_41	0.987976
Os_CO.like_11	Os_HSF_17	0.987973
Os_C3H_1	Os_MYB_27	0.98797
Os_C2H2_34	Os_WRKY_58	0.987965
Os_20	Os_8	0.987964
Os_HSF_5	Os_Trihelix_3	0.987964
Os_C2H2_36	Os_NAC_14	0.987963
Os_ARR.B_3	Os_MYB_related_30	0.987961
Os_C3H_24	Os_ERF_52	0.987957
Os_HSF_6	Os_NAC_48	0.987956
Os_MYB_39	Os_MYB_related_35	0.987952
Os_ERF_3	Os_MYB_11	0.987947
Os_23	Os_HSF_1	0.987932
Os_bZIP_51	Os_ERF_1	0.987931
Os_58	Os_C2H2_37	0.987927
Os_44	Os_bHLH_12	0.987925
Os_GRAS_17	Os_NF.X1_2.1	0.987924
Os_bHLH_20	Os_MYB_related_9	0.987924
Os_MYB_11	Os_WRKY_22	0.987918
Os_MYB_44	Os_MYB_related_11	0.987915
Os_C2H2_34	Os_HSF_16	0.987915
Os_C2H2_37	Os_ERF_19	0.987912
Os_27	Os_HSF_2	0.987908
Os_bZIP_20	Os_MYB_related_33	0.987906
Os_ERF_43	Os_MYB_41	0.987903
Os_HSF_2	Os_MYB_39	0.987902
Os_NAC_44	Os_WRKY_11	0.9879
Os_13	Os_NF.YB_5	0.987899
Os_ARF_2	Os_ERF_7	0.987896
Os_C2H2_38	Os_ERF_33	0.98789
Os_HSF_5	Os_NAC_7	0.987886
Os_C3H_22	Os_WRKY_52	0.98788
Os_bZIP_4	Os_Dof_15	0.987872
Os_48	Os_HSF_11	0.987871
Os_31	Os_Nin.like_4	0.987868
Os_ARR.B_3	Os_MYB_related_34	0.987867
Os_bZIP_2	Os_NAC_46	0.987862
Os_HD.ZIP_19	Os_NAC_17	0.987852
Os_58	Os_NAC_45	0.987846
Os_ARF_16	Os_GRAS_17	0.987843
Os_61	Os_C3H_5	0.987843
Os_C2H2_38	Os_WRKY_27	0.987838
Os_ARF_15	Os_WOX	0.987837
Os_CO.like_11	Os_MYB_related_34	0.987833
Os_27	Os_bZIP_15	0.987832
Os_bZIP_49	Os_bZIP_54	0.987831
Os_bZIP_4	Os_NAC_17	0.987821
Os_44	Os_bZIP_11	0.987821
Os_27	Os_MYB_related_37	0.987812
Os_31	Os_NAC_7	0.987811
Os_MYB_46	Os_WRKY_27	0.987807
Os_ARF_13	Os_bZIP_49	0.987807
Os_Dof_13	Os_Trihelix_3	0.987804
Os_CO.like_2	Os_DBB_6	0.9878
Os_58	Os_bZIP_42	0.987798
Os_ERF_33	Os_HD.ZIP_18	0.987797
Os_bZIP_4	Os_WRKY_46	0.987795
Os_54	Os_WRKY_27	0.987794
Os_13	Os_Dof_13	0.987789
Os_44	Os_46	0.987787
Os_bZIP_15	Os_NAC_8	0.987787
Os_bZIP_49	Os_MYB_related_11	0.987786
Os_13	Os_MYB_44	0.987781
Os_ARF_16	Os_NAC_33	0.987781
Os_HD.ZIP_19	Os_HSF_5	0.987778
Os_CO.like_11	Os_MYB_44	0.987777
Os_bZIP_63	Os_Trihelix_15	0.987773
Os_bHLH_50	Os_MYB_related_34	0.987772
Os_C2H2_34	Os_WRKY_52	0.987771
Os_48	Os_MYB_43	0.987771
Os_ERF_51	Os_WRKY_63	0.987765
Os_22	Os_28	0.987761
Os_bZIP_49	Os_ERF_19	0.987757
Os_48	Os_WRKY_27	0.987755
Os_HSF_2	Os_MYB_11	0.987751
Os_MYB_related_34	Os_WOX	0.987751
Os_NAC_47	Os_WRKY_58	0.987749
Os_bZIP_47	Os_Dof_15	0.987744
Os_C2H2_37	Os_WOX	0.98774
Os_HD.ZIP_19	Os_MYB_related_11	0.987736
Os_MYB_16	Os_MYB_related_9	0.987736
Os_bHLH_60	Os_MYB_48	0.987734
Os_CPP_7	Os_ERF_32	0.987733
Os_bHLH_10	Os_NAC_43	0.987731
Os_48	Os_NAC_31	0.987726
Os_58	Os_bZIP_47	0.987717
Os_NAC_8	Os_WRKY_52	0.987715
Os_bHLH_60	Os_bZIP_13	0.987713
Os_CO.like_11	Os_NAC_33	0.987713
Os_bZIP_23	Os_Trihelix_8	0.987712
Os_54	Os_C3H_21	0.987709
Os_SRS_2	Os_WRKY_58	0.987706
Os_SBP_6	Os_VOZ	0.987705
Os_ERF_3	Os_G2.like_5	0.987705
Os_36	Os_HSF_1	0.987702
Os_MYB_related_33	Os_WRKY_40	0.987699
Os_NAC_44	Os_WRKY_52	0.987698
Os_ARR.B_3	Os_bZIP_54	0.987697
Os_CO.like_5	Os_WRKY_22	0.987694
Os_ARR.B_4	Os_HSF_6	0.987691
Os_G2.like_15	Os_MYB_related_5	0.987689
Os_13	Os_C3H_21	0.987688
Os_bZIP_15	Os_NAC_46	0.987686
Os_bZIP_20	Os_bZIP_54	0.987682
Os_bZIP_47	Os_MYB_46	0.98767
Os_HD.ZIP_18	Os_Trihelix_3	0.987669
Os_HSF_6	Os_MYB_45	0.987667
Os_bZIP_5	Os_WRKY_11	0.987665
Os_62	Os_NF.YC_6	0.987661
Os_Dof_15	Os_MYB_related_35	0.987659
Os_58	Os_bZIP_2	0.987658
Os_MYB_44	Os_Trihelix_3	0.987657
Os_62	Os_LBD_2	0.98764
Os_bZIP_49	Os_WOX	0.987639
Os_G2.like_27	Os_VOZ	0.98763
Os_DBB_8	Os_HSF_11	0.987629
Os_G2.like_29	Os_MYB_related_37	0.987624
Os_bHLH_9	Os_bZIP_17	0.987621
Os_Dof_15	Os_MYB_41	0.98762
Os_22	Os_29	0.987615
Os_LBD_2	Os_MYB_16	0.987613
Os_G2.like_27	Os_NAC_17	0.98761
Os_bZIP_47	Os_C2H2_30	0.987606
Os_bZIP_60	Os_Dof_15	0.987605
Os_bZIP_51	Os_ERF_14	0.987604
Os_54	Os_CPP_6	0.9876
Os_bZIP_61	Os_MYB_49	0.987588
Os_C2H2_30	Os_G2.like_5	0.987583
Os_bZIP_13	Os_MYB_related_34	0.987582
Os_ERF_48	Os_MYB_11	0.987571
Os_C2H2_38	Os_ERF_19	0.987563
Os_ARF_13	Os_WRKY_52	0.987557
Os_13	Os_Trihelix_9	0.987557
Os_bZIP_13	Os_ERF_48	0.987557
Os_C2H2_38	Os_C3H_22	0.987555
Os_bHLH_10	Os_C2H2_39	0.987553
Os_C3H_23	Os_C3H_24	0.987552
Os_NAC_14	Os_Trihelix_3	0.987549
Os_bZIP_47	Os_Dof_13	0.987549
Os_ERF_48	Os_WRKY_11	0.987535
Os_58	Os_bZIP_23	0.987529
Os_HSF_2	Os_NAC_14	0.987525
Os_21	Os_NAC_33	0.98751
Os_ERF_49	Os_WRKY_52	0.987499
Os_21	Os_bZIP_49	0.987497
Os_ARF_13	Os_MYB_related_37	0.987497
Os_32	Os_WRKY_11	0.987495
Os_31	Os_WRKY_55	0.987493
Os_NAC_17	Os_NAC_43	0.987492
Os_G2.like_28	Os_MYB_48	0.987491
Os_ERF_3	Os_G2.like_27	0.987484
Os_bZIP_13	Os_MYB_41	0.987478
Os_bZIP_5	Os_HSF_11	0.987476
Os_23	Os_ZF.HD_1	0.987475
Os_ARF_13	Os_C3H_22	0.987473
Os_NAC_47	Os_WOX	0.987471
Os_TALE_1	Os_TALE_3	0.987464
Os_G2.like_5	Os_WRKY_11	0.987463
Os_bZIP_47	Os_MYB_related_28	0.987463
Os_C2H2_36	Os_NAC_8	0.987462
Os_MYB_related_34	Os_Nin.like_4	0.987461
Os_MYB_related_36	Os_WRKY_22	0.987459
Os_VOZ	Os_WRKY_22	0.987456
Os_43	Os_Dof_13	0.987455
Os_ERF_14	Os_MYB_33	0.987453
Os_NAC_31	Os_NAC_33	0.987449
Os_31	Os_C2H2_30	0.987447
Os_ARR.B_4	Os_C2H2_34	0.987443
Os_bZIP_15	Os_C2H2_38	0.987439
Os_ARR.B_4	Os_GRAS_17	0.987438
Os_bZIP_5	Os_NAC_31	0.987437
Os_16	Os_NF.YC_6	0.987436
Os_54	Os_GATA_8	0.987432
Os_MYB_11	Os_WRKY_40	0.98743
Os_MYB_46	Os_MYB_48	0.987429
Os_bZIP_53	Os_NAC_14	0.987428
Os_62	Os_ARF_6	0.987426
Os_MYB_48	Os_Nin.like_4	0.987423
Os_46	Os_NF.YB	0.987418
Os_26	Os_62	0.987417
Os_GRAS_17	Os_Nin.like_4	0.987416
Os_32	Os_WRKY_55	0.987412
Os_G2.like_27	Os_MYB_46	0.987404
Os_C3H_23	Os_NAC_47	0.987397
Os_NAC_18	Os_WRKY_58	0.987394
Os_CO.like_5	Os_WRKY_27	0.98739
Os_ARF_13	Os_MYB_45	0.987386
Os_ERF_32	Os_LBD_3	0.987377
Os_bZIP_54	Os_MYB_related_27	0.987375
Os_bZIP_60	Os_MYB_related_29	0.987374
Os_HSF_6	Os_NAC_17	0.987373
Os_bZIP_15	Os_MYB_38	0.987368
Os_bHLH_10	Os_WRKY_22	0.987367
Os_MYB_41	Os_MYB_46	0.987366
Os_20	Os_bHLH_12	0.987363
Os_bZIP_47	Os_ERF_33	0.987363
Os_bZIP_37	Os_C2H2_34	0.987362
Os_HSF_16	Os_WRKY_52	0.987361
Os_G2.like_29	Os_LBD_6	0.987361
Os_HSF_1	Os_NF.YB	0.987359
Os_62	Os_67	0.987352
Os_12	Os_MYB_related_15	0.987337
Os_NAC_14	Os_NAC_33	0.987335
Os_HSF_13	Os_NAC_46	0.987327
Os_ERF_33	Os_MYB_28	0.987326
Os_bZIP_11	Os_HD.ZIP_9	0.987325
Os_C3H_15	Os_WRKY_55	0.987324
Os_MYB_related_37	Os_Trihelix_9	0.987321
Os_48	Os_HSF_2	0.987321
Os_13	Os_MYB_46	0.987319
Os_HSF_11	Os_MYB_28	0.987317
Os_HD.ZIP_19	Os_MYB_46	0.987317
Os_MYB_related_36	Os_NAC_31	0.987315
Os_GRAS_17	Os_MYB_related_34	0.987311
Os_bZIP_54	Os_WRKY_27	0.987309
Os_bZIP_47	Os_C3H_22	0.987307
Os_34	Os_MYB_related_9	0.987304
Os_C2H2_34	Os_WRKY_11	0.987304
Os_bZIP_15	Os_MYB_44	0.987304
Os_ERF_33	Os_MYB_related_37	0.9873
Os_G2.like_5	Os_NAC_8	0.987289
Os_53	Os_61	0.987286
Os_bZIP_53	Os_NAC_43	0.987286
Os_20	Os_C2H2_9	0.987284
Os_NF.X1_2.1	Os_WRKY_11	0.987276
Os_8	Os_NF.YC_6	0.98727
Os_C3H_5	Os_NF.YB	0.987267
Os_31	Os_MYB_related_34	0.987265
Os_ERF_19	Os_NAC_42	0.987264
Os_bZIP_49	Os_bZIP_60	0.987263
Os_MYB_related_28	Os_VOZ	0.987262
Os_bZIP_38	Os_MYB_related_31	0.987257
Os_G2.like_27	Os_NAC_8	0.987252
Os_ARF_16	Os_HSF_5	0.987252
Os_HSF_11	Os_MYB_43	0.987247
Os_bZIP_47	Os_HD.ZIP_20	0.987247
Os_41	Os_C2H2_34	0.987245
Os_31	Os_NF.X1_2.1	0.987241
Os_ARF_16	Os_MYB_44	0.98724
Os_MYB_11	Os_NAC_8	0.987237
Os_bZIP_15	Os_bZIP_47	0.987232
Os_ERF_3	Os_MYB_46	0.98723
Os_NAC_8	Os_SRS_2	0.987229
Os_NAC_14	Os_WRKY_52	0.987224
Os_ERF_49	Os_VOZ	0.987224
Os_1	Os_MYB_16	0.987221
Os_C2H2_36	Os_ERF_49	0.987221
Os_58	Os_NAC_7	0.98722
Os_13	Os_32	0.987213
Os_MYB_11	Os_WOX	0.987207
Os_bZIP_20	Os_C2H2_38	0.987204
Os_12	Os_67	0.987204
Os_13	Os_WRKY_58	0.987202
Os_bHLH_10	Os_NAC_31	0.987197
Os_bZIP_60	Os_NAC_17	0.987193
Os_MYB_related_35	Os_MYB_related_37	0.987192
Os_bZIP_32	Os_NAC_9	0.98719
Os_bHLH_10	Os_Trihelix_14	0.987189
Os_ARR.B_4	Os_bZIP_54	0.987189
Os_C2H2_37	Os_WRKY_58	0.987186
Os_NAC_47	Os_WRKY_46	0.987175
Os_ERF_49	Os_Nin.like_4	0.987174
Os_C2H2_38	Os_ERF_3	0.987174
Os_bZIP_42	Os_MYB_related_2	0.987172
Os_C3H_1	Os_HSF_10	0.987169
Os_G2.like_9	Os_TCP_1	0.987168
Os_13	Os_HSF_17	0.987164
Os_bZIP_53	Os_ERF_33	0.987162
Os_bZIP_37	Os_NAC_39	0.987162
Os_Nin.like_2	Os_WRKY_34	0.98716
Os_NAC_45	Os_WRKY_46	0.987155
Os_bZIP_51	Os_WRKY_9	0.987154
Os_MYB_41	Os_NAC_44	0.987152
Os_bZIP_54	Os_NAC_48	0.987152
Os_NAC_48	Os_Trihelix_3	0.987149
Os_16	Os_TCP_1	0.987148
Os_bZIP_20	Os_MYB_11	0.987144
Os_DBB_4	Os_MYB_related_9	0.98714
Os_58	Os_ARF_14	0.987138
Os_C2H2_38	Os_NF.X1_2.1	0.987136
Os_NAC_31	Os_Trihelix_14	0.987133
Os_MYB_related_29	Os_SBP_6	0.987132
Os_bZIP_9	Os_Dof_3	0.987131
Os_22	Os_HSF_1	0.987129
Os_32	Os_bZIP_13	0.987129
Os_23	Os_bZIP_11	0.987128
Os_28	Os_bHLH_12	0.987125
Os_C2H2_32	Os_WRKY_33	0.987122
Os_48	Os_Dof_15	0.987118
Os_CO.like_5	Os_NAC_43	0.987117
Os_bZIP_47	Os_ERF_40	0.987116
Os_29	Os_MYB_16	0.987109
Os_HD.ZIP_10	Os_HD.ZIP_8	0.987105
Os_WRKY_33	Os_WRKY_54	0.987102
Os_41	Os_Trihelix_3	0.987101
Os_31	Os_MYB_45	0.987091
Os_C2H2_36	Os_NAC_44	0.987085
Os_HSF_5	Os_MYB_41	0.987082
Os_MYB_related_34	Os_WRKY_57	0.987082
Os_C2H2_9	Os_DBB_4	0.987081
[truncated: 76,302 more rows]
