# Supplementary material for: A Comparative Transcriptomic Meta-Analysis Revealed Conserved Key Genes and Regulatory Networks Involved in Drought Tolerance in Cereal Crops
Source: Int J Mol Sci. 2021 Dec 2;22(23):13062. doi: 10.3390/ijms222313062 (PMC8657901; doi:10.3390/ijms222313062)
Supplement: Supplementary file 1 [file ijms-22-13062-s001.zip › Supplementary_file_S7.xlsx]

## Sheet: Motifs
Consensus motif	Motif name	Reference	TF class	Total/Average in 3000bp
CCACA	NF-CO	Gnesutta et al. Plant Cell 2017	NF-CO	5.97429
CCAAT	NF-Y	Gnesutta et al. Plant Cell 2017	NF-Y	6.15563
CCACATA	NF-YB	Gnesutta et al. Plant Cell 2017	NF-Y	0.43912
TACGT	NAP	Lindemose et al. NAR 2014	NAC	3.11286
CACGCA	NACR	Lindemose et al. NAR 2014	NAC	1.03387
ACGTG	ABRELATERD1	New Place	bZIP	4.02666
MACGYGB	ABRERATCAL	New Place	bZIP	2.71607
YACGTGGC	ABREATCONSENSUS	New PLACE	bZIP	0.251296
WAACCA	MYB1AT	New PLACE	MYB-related	4.16271
TAACTG	MYB2AT	New PLACE	MYB-related	1.10198
CNGTTR	MYBCORE	New Place	MYB-related	8.02163
AACGG	MYBCOREATCYCB1	New Place	MYB-related	3.51488
MACCWAMC	MYBPLANT	New PLACE	MYB-related	1.01709
CCWACC	MYBPZM	New PLACE	MYB-related	2.44499
GGATA	MYBST1	New PLACE	MYB-related	4.60334
RCCGAC	DRECRTCOREAT	New PLACE	ERF	1.93527

## Sheet: RSAT_matches_seq
PatID	Strand	Pattern	SeqID	Start	End	matching_seq	Score
START_END	DR	-	Os04g0414700|Os04g0414700	-3000	-1	-	0
NF-CO	D	CCACA	Os04g0414700|Os04g0414700	-2375	-2371	gcacCCACAtgtc	1
NF-CO	D	CCACA	Os04g0414700|Os04g0414700	-2320	-2316	agccCCACAtatc	1
NF-CO	D	CCACA	Os04g0414700|Os04g0414700	-1233	-1229	ttagCCACAtagg	1
NF-CO	D	CCACA	Os04g0414700|Os04g0414700	-913	-909	acatCCACAcaag	1
NF-CO	D	CCACA	Os04g0414700|Os04g0414700	-293	-289	atctCCACAaaac	1
NF-CO	D	CCACA	Os04g0414700|Os04g0414700	-106	-102	tgatCCACAtcac	1
NF-CO	D	CCACA	Os04g0414700|Os04g0414700	-89	-85	gcccCCACAacga	1
NF-CO	D	CCACA	Os04g0414700|Os04g0414700	-32	-28	accaCCACAaaat	1
NF-CO	D	CCACA	Os04g0414700|Os04g0414700	-5	-1	gctgCCACAataa	1
NF-CO	R	CCACA	Os04g0414700|Os04g0414700	-2468	-2464	ttagCCACAtaga	1
NF-CO	R	CCACA	Os04g0414700|Os04g0414700	-2228	-2224	gcgcCCACAtgcg	1
NF-CO	R	CCACA	Os04g0414700|Os04g0414700	-1412	-1408	caccCCACAtagc	1
NF-CO	R	CCACA	Os04g0414700|Os04g0414700	-1367	-1363	ggccCCACAtgtc	1
NF-CO	R	CCACA	Os04g0414700|Os04g0414700	-1304	-1300	ggacCCACAtgtc	1
NF-CO	R	CCACA	Os04g0414700|Os04g0414700	-1135	-1131	tgaaCCACAaaac	1
NF-Y	D	CCAAT	Os04g0414700|Os04g0414700	-858	-854	ttcaCCAATtgca	1
NF-Y	D	CCAAT	Os04g0414700|Os04g0414700	-157	-153	tctcCCAATaggc	1
NF-Y	R	CCAAT	Os04g0414700|Os04g0414700	-2627	-2623	tattCCAATccgt	1
NF-Y	R	CCAAT	Os04g0414700|Os04g0414700	-1958	-1954	tctaCCAATgtag	1
NF-Y	R	CCAAT	Os04g0414700|Os04g0414700	-1942	-1938	cagtCCAATtata	1
NF-Y	R	CCAAT	Os04g0414700|Os04g0414700	-998	-994	tttaCCAATtcac	1
NF-YB	D	CCACATA	Os04g0414700|Os04g0414700	-2320	-2314	agccCCACATAtcat	1
NF-YB	D	CCACATA	Os04g0414700|Os04g0414700	-1233	-1227	ttagCCACATAggcg	1
NF-YB	R	CCACATA	Os04g0414700|Os04g0414700	-2470	-2464	ttagCCACATAgacg	1
NF-YB	R	CCACATA	Os04g0414700|Os04g0414700	-1414	-1408	caccCCACATAgcag	1
NAP	D	TACGT	Os04g0414700|Os04g0414700	-730	-726	ctacTACGTgcag	1
ABRELATERD1	D	ACGTG	Os04g0414700|Os04g0414700	-2480	-2476	gccgACGTGgcgt	1
ABRELATERD1	D	ACGTG	Os04g0414700|Os04g0414700	-2439	-2435	tctgACGTGatat	1
ABRELATERD1	D	ACGTG	Os04g0414700|Os04g0414700	-2417	-2413	gctgACGTGgcaa	1
ABRELATERD1	D	ACGTG	Os04g0414700|Os04g0414700	-2329	-2325	gcccACGTGagcc	1
ABRELATERD1	D	ACGTG	Os04g0414700|Os04g0414700	-1349	-1345	gcccACGTGggct	1
ABRELATERD1	D	ACGTG	Os04g0414700|Os04g0414700	-729	-725	tactACGTGcagt	1
ABRELATERD1	R	ACGTG	Os04g0414700|Os04g0414700	-2330	-2326	gctcACGTGggcc	1
ABRELATERD1	R	ACGTG	Os04g0414700|Os04g0414700	-1350	-1346	gcccACGTGggcc	1
ABRELATERD1	R	ACGTG	Os04g0414700|Os04g0414700	-1262	-1258	tctgACGTGgcaa	1
ABRELATERD1	R	ACGTG	Os04g0414700|Os04g0414700	-1221	-1217	gccgACGTGacgc	1
ABRELATERD1	R	ACGTG	Os04g0414700|Os04g0414700	-55	-51	gcggACGTGgcgg	1
ABRERATCAL	D	MACGYGB	Os04g0414700|Os04g0414700	-1350	-1344	ggccCACGTGGgctc	1
ABRERATCAL	R	MACGYGB	Os04g0414700|Os04g0414700	-2331	-2325	ggctCACGTGGgccc	1
ABRERATCAL	R	MACGYGB	Os04g0414700|Os04g0414700	-1806	-1800	agctCACGCGGgcga	1
ABRERATCAL	R	MACGYGB	Os04g0414700|Os04g0414700	-1351	-1345	agccCACGTGGgcca	1
MYB1AT	D	WAACCA	Os04g0414700|Os04g0414700	-2693	-2688	aaagTAACCAcgct	1
MYB2AT	R	TAACTG	Os04g0414700|Os04g0414700	-724	-719	agttTAACTGcacg	1
MYBCORE	D	CNGTTR	Os04g0414700|Os04g0414700	-724	-719	cgtgCAGTTAaact	1
MYBCORE	R	CNGTTR	Os04g0414700|Os04g0414700	-2057	-2052	catgCAGTTGagct	1
MYBCORE	R	CNGTTR	Os04g0414700|Os04g0414700	-1007	-1002	ttcaCCGTTGcaca	1
MYBCORE	R	CNGTTR	Os04g0414700|Os04g0414700	-470	-465	tattCCGTTAggaa	1
MYBCORE	R	CNGTTR	Os04g0414700|Os04g0414700	-435	-430	tagtCGGTTAcgac	1
MYBCORE	R	CNGTTR	Os04g0414700|Os04g0414700	-47	-42	gctgCGGTTGcgga	1
MYBCOREATCYCB1	D	AACGG	Os04g0414700|Os04g0414700	-1006	-1002	gtgcAACGGtgaa	1
MYBCOREATCYCB1	D	AACGG	Os04g0414700|Os04g0414700	-469	-465	tcctAACGGaata	1
MYBCOREATCYCB1	R	AACGG	Os04g0414700|Os04g0414700	-1570	-1566	agcgAACGGcggg	1
MYBPZM	D	CCWACC	Os04g0414700|Os04g0414700	-761	-756	atcgCCTACCaaag	1
MYBPZM	R	CCWACC	Os04g0414700|Os04g0414700	-2010	-2005	acccCCAACCataa	1
MYBPZM	R	CCWACC	Os04g0414700|Os04g0414700	-247	-242	agttCCTACCgagg	1
MYBST1	D	GGATA	Os04g0414700|Os04g0414700	-2900	-2896	ccgtGGATAtctg	1
MYBST1	D	GGATA	Os04g0414700|Os04g0414700	-2081	-2077	caatGGATAgcta	1
MYBST1	D	GGATA	Os04g0414700|Os04g0414700	-332	-328	agtcGGATAtaca	1
MYBST1	R	GGATA	Os04g0414700|Os04g0414700	-2927	-2923	agatGGATAtagt	1
MYBST1	R	GGATA	Os04g0414700|Os04g0414700	-341	-337	gactGGATAtgga	1
MYBST1	R	GGATA	Os04g0414700|Os04g0414700	-305	-301	ttatGGATAcccc	1
MYBST1	R	GGATA	Os04g0414700|Os04g0414700	-184	-180	gagtGGATAaggc	1
MYBST1	R	GGATA	Os04g0414700|Os04g0414700	-174	-170	acttGGATAtgag	1
DRECRTCOREAT	D	RCCGAC	Os04g0414700|Os04g0414700	-2484	-2479	tttgGCCGACgtgg	1
DRECRTCOREAT	D	RCCGAC	Os04g0414700|Os04g0414700	-433	-428	cgtaACCGACtaga	1
DRECRTCOREAT	R	RCCGAC	Os04g0414700|Os04g0414700	-1485	-1480	caaaGCCGACgggg	1
DRECRTCOREAT	R	RCCGAC	Os04g0414700|Os04g0414700	-1218	-1213	tttgGCCGACgtga	1
START_END	DR	-	Os05g0535900|Os05g0535900	-3000	-1	-	0
NF-CO	D	CCACA	Os05g0535900|Os05g0535900	-2686	-2682	ggagCCACAcgtc	1
NF-CO	D	CCACA	Os05g0535900|Os05g0535900	-2641	-2637	caatCCACActgg	1
NF-CO	D	CCACA	Os05g0535900|Os05g0535900	-2238	-2234	agaaCCACActgc	1
NF-CO	D	CCACA	Os05g0535900|Os05g0535900	-579	-575	atcaCCACAcata	1
NF-CO	D	CCACA	Os05g0535900|Os05g0535900	-410	-406	agtaCCACAccag	1
NF-CO	D	CCACA	Os05g0535900|Os05g0535900	-250	-246	ggccCCACAcgtc	1
NF-CO	D	CCACA	Os05g0535900|Os05g0535900	-215	-211	ggacCCACAtgtc	1
NF-CO	R	CCACA	Os05g0535900|Os05g0535900	-2979	-2975	cgatCCACAcata	1
NF-CO	R	CCACA	Os05g0535900|Os05g0535900	-2699	-2695	ggacCCACAcgtc	1
NF-CO	R	CCACA	Os05g0535900|Os05g0535900	-1707	-1703	cctaCCACAaagg	1
NF-CO	R	CCACA	Os05g0535900|Os05g0535900	-949	-945	catcCCACAcata	1
NF-CO	R	CCACA	Os05g0535900|Os05g0535900	-519	-515	gggaCCACAtgtc	1
NF-CO	R	CCACA	Os05g0535900|Os05g0535900	-497	-493	ccacCCACAgtat	1
NF-Y	D	CCAAT	Os05g0535900|Os05g0535900	-33	-29	tggcCCAATttgt	1
NF-Y	R	CCAAT	Os05g0535900|Os05g0535900	-2765	-2761	tgatCCAATcata	1
NF-Y	R	CCAAT	Os05g0535900|Os05g0535900	-2757	-2753	tgctCCAATgatc	1
NF-Y	R	CCAAT	Os05g0535900|Os05g0535900	-1355	-1351	tgcaCCAATctgc	1
NF-Y	R	CCAAT	Os05g0535900|Os05g0535900	-1034	-1030	attcCCAATataa	1
NF-Y	R	CCAAT	Os05g0535900|Os05g0535900	-1003	-999	aattCCAATgtaa	1
NF-Y	R	CCAAT	Os05g0535900|Os05g0535900	-550	-546	gcctCCAATgtca	1
NAP	D	TACGT	Os05g0535900|Os05g0535900	-2170	-2166	tttaTACGTcgct	1
NAP	D	TACGT	Os05g0535900|Os05g0535900	-1820	-1816	ctaaTACGTgtaa	1
NAP	D	TACGT	Os05g0535900|Os05g0535900	-1068	-1064	tcatTACGTcacg	1
NAP	D	TACGT	Os05g0535900|Os05g0535900	-864	-860	ttatTACGTttat	1
NAP	R	TACGT	Os05g0535900|Os05g0535900	-2432	-2428	ttcaTACGTtaac	1
NAP	R	TACGT	Os05g0535900|Os05g0535900	-1212	-1208	tcatTACGTcgga	1
NACR	R	CACGCA	Os05g0535900|Os05g0535900	-2220	-2215	aaaaCACGCActcc	1
ABRELATERD1	D	ACGTG	Os05g0535900|Os05g0535900	-2702	-2698	attgACGTGtggg	1
ABRELATERD1	D	ACGTG	Os05g0535900|Os05g0535900	-1819	-1815	taatACGTGtaag	1
ABRELATERD1	R	ACGTG	Os05g0535900|Os05g0535900	-2683	-2679	attgACGTGtggc	1
ABRELATERD1	R	ACGTG	Os05g0535900|Os05g0535900	-1571	-1567	ggtaACGTGgtgc	1
ABRELATERD1	R	ACGTG	Os05g0535900|Os05g0535900	-312	-308	gtgaACGTGgctt	1
ABRELATERD1	R	ACGTG	Os05g0535900|Os05g0535900	-247	-243	tgtgACGTGtggg	1
ABRERATCAL	R	MACGYGB	Os05g0535900|Os05g0535900	-1572	-1566	aggtAACGTGGtgct	1
ABRERATCAL	R	MACGYGB	Os05g0535900|Os05g0535900	-313	-307	ggtgAACGTGGcttg	1
MYB1AT	R	WAACCA	Os05g0535900|Os05g0535900	-1747	-1742	ccagTAACCAggta	1
MYB2AT	D	TAACTG	Os05g0535900|Os05g0535900	-1770	-1765	actaTAACTGaaaa	1
MYB2AT	R	TAACTG	Os05g0535900|Os05g0535900	-2783	-2778	aaccTAACTGtgcc	1
MYBCORE	D	CNGTTR	Os05g0535900|Os05g0535900	-2783	-2778	ggcaCAGTTAggtt	1
MYBCORE	D	CNGTTR	Os05g0535900|Os05g0535900	-2139	-2134	gcgcCGGTTGcccc	1
MYBCORE	D	CNGTTR	Os05g0535900|Os05g0535900	-2041	-2036	gccaCCGTTGcgcg	1
MYBCORE	D	CNGTTR	Os05g0535900|Os05g0535900	-1988	-1983	ttctCGGTTGgaag	1
MYBCORE	D	CNGTTR	Os05g0535900|Os05g0535900	-589	-584	caagCCGTTAatca	1
MYBCORE	D	CNGTTR	Os05g0535900|Os05g0535900	-467	-462	tagcCGGTTAaaaa	1
MYBCORE	D	CNGTTR	Os05g0535900|Os05g0535900	-134	-129	ggttCCGTTGggcg	1
MYBCORE	R	CNGTTR	Os05g0535900|Os05g0535900	-1770	-1765	ttttCAGTTAtagt	1
MYBCORE	R	CNGTTR	Os05g0535900|Os05g0535900	-1483	-1478	cgccCTGTTAgttg	1
MYBCORE	R	CNGTTR	Os05g0535900|Os05g0535900	-1259	-1254	aaatCTGTTAtttt	1
MYBCOREATCYCB1	D	AACGG	Os05g0535900|Os05g0535900	-1876	-1872	ctaaAACGGaggt	1
MYBCOREATCYCB1	R	AACGG	Os05g0535900|Os05g0535900	-2121	-2117	gtcgAACGGcggt	1
MYBCOREATCYCB1	R	AACGG	Os05g0535900|Os05g0535900	-2041	-2037	gcgcAACGGtggc	1
MYBCOREATCYCB1	R	AACGG	Os05g0535900|Os05g0535900	-1940	-1936	ttgaAACGGagga	1
MYBCOREATCYCB1	R	AACGG	Os05g0535900|Os05g0535900	-1605	-1601	acagAACGGttct	1
MYBCOREATCYCB1	R	AACGG	Os05g0535900|Os05g0535900	-624	-620	aggaAACGGtttg	1
MYBCOREATCYCB1	R	AACGG	Os05g0535900|Os05g0535900	-589	-585	gattAACGGcttg	1
MYBCOREATCYCB1	R	AACGG	Os05g0535900|Os05g0535900	-134	-130	gcccAACGGaacc	1
MYBPLANT	R	MACCWAMC	Os05g0535900|Os05g0535900	-2781	-2774	tgccAACCTAACtgtg	1
MYBPZM	R	CCWACC	Os05g0535900|Os05g0535900	-2777	-2772	tatgCCAACCtaac	1
MYBPZM	R	CCWACC	Os05g0535900|Os05g0535900	-1987	-1982	ccttCCAACCgaga	1
MYBPZM	R	CCWACC	Os05g0535900|Os05g0535900	-1704	-1699	ctagCCTACCacaa	1
MYBST1	D	GGATA	Os05g0535900|Os05g0535900	-2871	-2867	tcagGGATActga	1
MYBST1	D	GGATA	Os05g0535900|Os05g0535900	-2567	-2563	gaatGGATAtctt	1
MYBST1	D	GGATA	Os05g0535900|Os05g0535900	-1016	-1012	aagtGGATActaa	1
MYBST1	D	GGATA	Os05g0535900|Os05g0535900	-918	-914	tttgGGATAgaga	1
MYBST1	R	GGATA	Os05g0535900|Os05g0535900	-2906	-2902	agcgGGATActta	1
MYBST1	R	GGATA	Os05g0535900|Os05g0535900	-22	-18	aagcGGATAaaac	1
DRECRTCOREAT	D	RCCGAC	Os05g0535900|Os05g0535900	-293	-288	ccccACCGACgagc	1
DRECRTCOREAT	R	RCCGAC	Os05g0535900|Os05g0535900	-2357	-2352	acaaACCGACcact	1
DRECRTCOREAT	R	RCCGAC	Os05g0535900|Os05g0535900	-1409	-1404	aaggACCGACtaca	1
START_END	DR	-	Os02g0626400|OsPAL	-3000	-1	-	0
NF-CO	D	CCACA	Os02g0626400|OsPAL	-1627	-1623	ccaaCCACAacgg	1
NF-CO	D	CCACA	Os02g0626400|OsPAL	-1562	-1558	ccaaCCACAcgca	1
NF-CO	D	CCACA	Os02g0626400|OsPAL	-877	-873	tcctCCACAtctc	1
NF-CO	D	CCACA	Os02g0626400|OsPAL	-390	-386	ccgtCCACAcacg	1
NF-CO	D	CCACA	Os02g0626400|OsPAL	-307	-303	caccCCACAcagc	1
NF-CO	D	CCACA	Os02g0626400|OsPAL	-86	-82	aaccCCACActgc	1
NF-CO	R	CCACA	Os02g0626400|OsPAL	-2037	-2033	ctaaCCACAtgca	1
NF-CO	R	CCACA	Os02g0626400|OsPAL	-1548	-1544	ttatCCACActtt	1
NF-CO	R	CCACA	Os02g0626400|OsPAL	-1375	-1371	actcCCACAttgt	1
NF-CO	R	CCACA	Os02g0626400|OsPAL	-961	-957	acgtCCACAcgga	1
NF-CO	R	CCACA	Os02g0626400|OsPAL	-763	-759	ttttCCACAttta	1
NF-Y	D	CCAAT	Os02g0626400|OsPAL	-2321	-2317	tctgCCAATatgc	1
NF-Y	D	CCAAT	Os02g0626400|OsPAL	-751	-747	aaaaCCAATtata	1
NF-Y	D	CCAAT	Os02g0626400|OsPAL	-223	-219	cgccCCAATcaca	1
NF-Y	R	CCAAT	Os02g0626400|OsPAL	-2827	-2823	aactCCAATgcaa	1
NF-Y	R	CCAAT	Os02g0626400|OsPAL	-2534	-2530	aatcCCAATacaa	1
NF-Y	R	CCAAT	Os02g0626400|OsPAL	-2503	-2499	aatcCCAATacaa	1
NF-Y	R	CCAAT	Os02g0626400|OsPAL	-2456	-2452	cataCCAATaaaa	1
NF-Y	R	CCAAT	Os02g0626400|OsPAL	-145	-141	cctaCCAATctta	1
NAP	D	TACGT	Os02g0626400|OsPAL	-2379	-2375	atttTACGTacaa	1
NAP	D	TACGT	Os02g0626400|OsPAL	-2118	-2114	tcatTACGTacag	1
NAP	D	TACGT	Os02g0626400|OsPAL	-1929	-1925	ttagTACGTactc	1
NAP	R	TACGT	Os02g0626400|OsPAL	-2378	-2374	gttgTACGTaaaa	1
NAP	R	TACGT	Os02g0626400|OsPAL	-2117	-2113	actgTACGTaatg	1
NAP	R	TACGT	Os02g0626400|OsPAL	-1928	-1924	ggagTACGTacta	1
NAP	R	TACGT	Os02g0626400|OsPAL	-956	-952	gtagTACGTccac	1
NACR	D	CACGCA	Os02g0626400|OsPAL	-1559	-1554	accaCACGCAaaaa	1
NACR	D	CACGCA	Os02g0626400|OsPAL	-280	-275	gcaaCACGCAacgc	1
ABRELATERD1	D	ACGTG	Os02g0626400|OsPAL	-2055	-2051	gaagACGTGaaga	1
ABRELATERD1	D	ACGTG	Os02g0626400|OsPAL	-1424	-1420	agaaACGTGgaat	1
ABRELATERD1	R	ACGTG	Os02g0626400|OsPAL	-572	-568	aatgACGTGatcg	1
ABRERATCAL	D	MACGYGB	Os02g0626400|OsPAL	-1425	-1419	aagaAACGTGGaatc	1
ABRERATCAL	D	MACGYGB	Os02g0626400|OsPAL	-1192	-1186	gctcAACGCGTctgt	1
ABRERATCAL	D	MACGYGB	Os02g0626400|OsPAL	-385	-379	cacaCACGCGCtctc	1
ABRERATCAL	D	MACGYGB	Os02g0626400|OsPAL	-173	-167	gggcCACGCGTcgcg	1
MYB1AT	D	WAACCA	Os02g0626400|OsPAL	-754	-749	aaaaAAACCAatta	1
MYB1AT	R	WAACCA	Os02g0626400|OsPAL	-2035	-2030	tgtcTAACCAcatg	1
MYB2AT	D	TAACTG	Os02g0626400|OsPAL	-1319	-1314	tgctTAACTGcata	1
MYB2AT	R	TAACTG	Os02g0626400|OsPAL	-2223	-2218	tttcTAACTGatat	1
MYBCORE	D	CNGTTR	Os02g0626400|OsPAL	-2223	-2218	atatCAGTTAgaaa	1
MYBCORE	D	CNGTTR	Os02g0626400|OsPAL	-1228	-1223	ttctCTGTTGgtac	1
MYBCORE	D	CNGTTR	Os02g0626400|OsPAL	-982	-977	taagCTGTTGgcca	1
MYBCORE	D	CNGTTR	Os02g0626400|OsPAL	-912	-907	agtgCTGTTGgcca	1
MYBCORE	D	CNGTTR	Os02g0626400|OsPAL	-894	-889	ggccCTGTTGaggc	1
MYBCORE	R	CNGTTR	Os02g0626400|OsPAL	-2065	-2060	cttcCAGTTGactc	1
MYBCORE	R	CNGTTR	Os02g0626400|OsPAL	-1624	-1619	tactCCGTTGtggt	1
MYBCORE	R	CNGTTR	Os02g0626400|OsPAL	-1405	-1400	agcaCAGTTGaacc	1
MYBCORE	R	CNGTTR	Os02g0626400|OsPAL	-1319	-1314	tatgCAGTTAagca	1
MYBCORE	R	CNGTTR	Os02g0626400|OsPAL	-253	-248	gaacCGGTTGgttc	1
MYBCOREATCYCB1	D	AACGG	Os02g0626400|OsPAL	-1623	-1619	ccacAACGGagta	1
MYBCOREATCYCB1	D	AACGG	Os02g0626400|OsPAL	-839	-835	tctgAACGGtctt	1
MYBCOREATCYCB1	R	AACGG	Os02g0626400|OsPAL	-23	-19	ggggAACGGgcgc	1
MYBCOREATCYCB1	R	AACGG	Os02g0626400|OsPAL	-12	-8	gaagAACGGtggg	1
MYBPLANT	D	MACCWAMC	Os02g0626400|OsPAL	-2176	-2169	attaCACCAACCaaag	1
MYBPLANT	D	MACCWAMC	Os02g0626400|OsPAL	-357	-350	gtccCACCAACCcccg	1
MYBPLANT	D	MACCWAMC	Os02g0626400|OsPAL	-256	-249	gccgAACCAACCggtt	1
MYBPLANT	D	MACCWAMC	Os02g0626400|OsPAL	-95	-88	caacAACCAAACccca	1
MYBPLANT	R	MACCWAMC	Os02g0626400|OsPAL	-1723	-1716	cctcCACCAACCtcct	1
MYBPLANT	R	MACCWAMC	Os02g0626400|OsPAL	-1651	-1644	ctcgCACCAAACaggg	1
MYBPZM	D	CCWACC	Os02g0626400|OsPAL	-2174	-2169	tacaCCAACCaaag	1
MYBPZM	D	CCWACC	Os02g0626400|OsPAL	-1864	-1859	caagCCAACCatcc	1
MYBPZM	D	CCWACC	Os02g0626400|OsPAL	-1631	-1626	gttgCCAACCacaa	1
MYBPZM	D	CCWACC	Os02g0626400|OsPAL	-1566	-1561	gttaCCAACCacac	1
MYBPZM	D	CCWACC	Os02g0626400|OsPAL	-355	-350	cccaCCAACCcccg	1
MYBPZM	D	CCWACC	Os02g0626400|OsPAL	-254	-249	cgaaCCAACCggtt	1
MYBPZM	D	CCWACC	Os02g0626400|OsPAL	-60	-55	agccCCAACCacca	1
MYBPZM	R	CCWACC	Os02g0626400|OsPAL	-1723	-1718	tccaCCAACCtcct	1
MYBPZM	R	CCWACC	Os02g0626400|OsPAL	-142	-137	cctgCCTACCaatc	1
MYBST1	D	GGATA	Os02g0626400|OsPAL	-1667	-1663	gcccGGATAccca	1
MYBST1	D	GGATA	Os02g0626400|OsPAL	-1545	-1541	gtgtGGATAaaaa	1
DRECRTCOREAT	D	RCCGAC	Os02g0626400|OsPAL	-457	-452	agcgACCGACggac	1
DRECRTCOREAT	D	RCCGAC	Os02g0626400|OsPAL	-449	-444	acggACCGACggac	1
DRECRTCOREAT	D	RCCGAC	Os02g0626400|OsPAL	-441	-436	acggACCGACtgac	1
START_END	DR	-	Os03g0592500|LHCB	-3000	-1	-	0
NF-CO	D	CCACA	Os03g0592500|LHCB	-2839	-2835	ggccCCACAtgtc	1
NF-CO	D	CCACA	Os03g0592500|LHCB	-2402	-2398	aggtCCACAagag	1
NF-CO	D	CCACA	Os03g0592500|LHCB	-1850	-1846	actgCCACAtagg	1
NF-CO	D	CCACA	Os03g0592500|LHCB	-1240	-1236	tgttCCACAatat	1
NF-CO	D	CCACA	Os03g0592500|LHCB	-490	-486	gggcCCACAtcaa	1
NF-CO	R	CCACA	Os03g0592500|LHCB	-2968	-2964	accaCCACAtcag	1
NF-CO	R	CCACA	Os03g0592500|LHCB	-2899	-2895	ggtcCCACAtata	1
NF-CO	R	CCACA	Os03g0592500|LHCB	-2864	-2860	gaccCCACAaaat	1
NF-CO	R	CCACA	Os03g0592500|LHCB	-1985	-1981	gggcCCACAtgtc	1
NF-CO	R	CCACA	Os03g0592500|LHCB	-1387	-1383	tatgCCACActtt	1
NF-CO	R	CCACA	Os03g0592500|LHCB	-100	-96	cgcgCCACAcaat	1
NF-Y	D	CCAAT	Os03g0592500|LHCB	-2162	-2158	ctccCCAATctcc	1
NF-Y	D	CCAAT	Os03g0592500|LHCB	-1413	-1409	aactCCAATcaac	1
NF-Y	D	CCAAT	Os03g0592500|LHCB	-510	-506	gtcaCCAATttgt	1
NF-Y	D	CCAAT	Os03g0592500|LHCB	-107	-103	gcggCCAATtgtg	1
NF-Y	R	CCAAT	Os03g0592500|LHCB	-1933	-1929	gggaCCAATttgt	1
NF-Y	R	CCAAT	Os03g0592500|LHCB	-1684	-1680	gcatCCAATgccc	1
NF-Y	R	CCAAT	Os03g0592500|LHCB	-1155	-1151	acttCCAATggga	1
NF-Y	R	CCAAT	Os03g0592500|LHCB	-172	-168	tccaCCAATccgc	1
NF-YB	D	CCACATA	Os03g0592500|LHCB	-1850	-1844	actgCCACATAggcg	1
NF-YB	R	CCACATA	Os03g0592500|LHCB	-2901	-2895	ggtcCCACATAtatg	1
NAP	D	TACGT	Os03g0592500|LHCB	-2949	-2945	ctagTACGTgggg	1
NAP	R	TACGT	Os03g0592500|LHCB	-1924	-1920	aaagTACGTggga	1
ABRELATERD1	D	ACGTG	Os03g0592500|LHCB	-2948	-2944	tagtACGTGgggt	1
ABRELATERD1	D	ACGTG	Os03g0592500|LHCB	-2937	-2933	gttgACGTGgcgc	1
ABRELATERD1	D	ACGTG	Os03g0592500|LHCB	-1878	-1874	cgccACGTGtaaa	1
ABRELATERD1	D	ACGTG	Os03g0592500|LHCB	-90	-86	gcggACGTGgcgc	1
ABRELATERD1	R	ACGTG	Os03g0592500|LHCB	-1925	-1921	aagtACGTGggac	1
ABRELATERD1	R	ACGTG	Os03g0592500|LHCB	-1890	-1886	gttaACGTGgcgc	1
ABRELATERD1	R	ACGTG	Os03g0592500|LHCB	-1879	-1875	ttacACGTGgcgt	1
ABRELATERD1	R	ACGTG	Os03g0592500|LHCB	-1838	-1834	attgACGTGgcgc	1
ABRERATCAL	D	MACGYGB	Os03g0592500|LHCB	-2236	-2230	tcggCACGCGCccat	1
ABRERATCAL	D	MACGYGB	Os03g0592500|LHCB	-1879	-1873	acgcCACGTGTaaag	1
ABRERATCAL	R	MACGYGB	Os03g0592500|LHCB	-1891	-1885	cgttAACGTGGcgct	1
ABRERATCAL	R	MACGYGB	Os03g0592500|LHCB	-1880	-1874	tttaCACGTGGcgtt	1
ABREATCONSENSUS	R	YACGTGGC	Os03g0592500|LHCB	-1881	-1874	tttaCACGTGGCgtta	1
MYB1AT	D	WAACCA	Os03g0592500|LHCB	-483	-478	catcAAACCAtagt	1
MYBCORE	R	CNGTTR	Os03g0592500|LHCB	-2717	-2712	acgcCGGTTGcatt	1
MYBCORE	R	CNGTTR	Os03g0592500|LHCB	-2469	-2464	accaCCGTTGgtcg	1
MYBCORE	R	CNGTTR	Os03g0592500|LHCB	-2205	-2200	ctcaCCGTTGatgg	1
MYBCORE	R	CNGTTR	Os03g0592500|LHCB	-1613	-1608	cgtcCCGTTGcctg	1
MYBCOREATCYCB1	D	AACGG	Os03g0592500|LHCB	-2468	-2464	gaccAACGGtggt	1
MYBCOREATCYCB1	D	AACGG	Os03g0592500|LHCB	-2204	-2200	catcAACGGtgag	1
MYBCOREATCYCB1	D	AACGG	Os03g0592500|LHCB	-1612	-1608	aggcAACGGgacg	1
MYBCOREATCYCB1	R	AACGG	Os03g0592500|LHCB	-2891	-2887	gacaAACGGgtcc	1
MYBCOREATCYCB1	R	AACGG	Os03g0592500|LHCB	-2564	-2560	gagaAACGGagaa	1
MYBPLANT	R	MACCWAMC	Os03g0592500|LHCB	-238	-231	caccCACCAACCaact	1
MYBPZM	D	CCWACC	Os03g0592500|LHCB	-1978	-1973	gggcCCTACCtgtc	1
MYBPZM	R	CCWACC	Os03g0592500|LHCB	-2610	-2605	ttccCCTACCggct	1
MYBPZM	R	CCWACC	Os03g0592500|LHCB	-238	-233	cccaCCAACCaact	1
MYBST1	D	GGATA	Os03g0592500|LHCB	-1998	-1994	gaagGGATAaact	1
MYBST1	D	GGATA	Os03g0592500|LHCB	-1697	-1693	cacgGGATAggaa	1
MYBST1	D	GGATA	Os03g0592500|LHCB	-1649	-1645	cgagGGATAggag	1
MYBST1	D	GGATA	Os03g0592500|LHCB	-1046	-1042	tgttGGATAtgaa	1
MYBST1	D	GGATA	Os03g0592500|LHCB	-870	-866	aaatGGATAaacc	1
MYBST1	D	GGATA	Os03g0592500|LHCB	-836	-832	gtaaGGATAtttt	1
MYBST1	R	GGATA	Os03g0592500|LHCB	-1776	-1772	aaccGGATAtctc	1
MYBST1	R	GGATA	Os03g0592500|LHCB	-1161	-1157	aatgGGATAaatc	1
MYBST1	R	GGATA	Os03g0592500|LHCB	-131	-127	gactGGATAtggg	1
START_END	DR	-	Os04g0234600|Os04g0234600	-3000	-1	-	0
NF-CO	D	CCACA	Os04g0234600|Os04g0234600	-2423	-2419	cttcCCACAagtc	1
NF-CO	D	CCACA	Os04g0234600|Os04g0234600	-2146	-2142	gtgtCCACAatag	1
NF-CO	D	CCACA	Os04g0234600|Os04g0234600	-2078	-2074	tcgaCCACAtaat	1
NF-CO	D	CCACA	Os04g0234600|Os04g0234600	-1579	-1575	aaatCCACActgt	1
NF-CO	D	CCACA	Os04g0234600|Os04g0234600	-1279	-1275	cctcCCACAtttg	1
NF-CO	D	CCACA	Os04g0234600|Os04g0234600	-1241	-1237	tgctCCACAaccc	1
NF-CO	D	CCACA	Os04g0234600|Os04g0234600	-75	-71	agggCCACAcaaa	1
NF-CO	D	CCACA	Os04g0234600|Os04g0234600	-20	-16	agcgCCACAtggc	1
NF-CO	R	CCACA	Os04g0234600|Os04g0234600	-2060	-2056	agttCCACAtgct	1
NF-CO	R	CCACA	Os04g0234600|Os04g0234600	-657	-653	gttgCCACAgaca	1
NF-CO	R	CCACA	Os04g0234600|Os04g0234600	-480	-476	acaaCCACAtgtg	1
NF-Y	D	CCAAT	Os04g0234600|Os04g0234600	-2901	-2897	ggttCCAATgaaa	1
NF-Y	D	CCAAT	Os04g0234600|Os04g0234600	-2579	-2575	ggtaCCAATtccc	1
NF-Y	D	CCAAT	Os04g0234600|Os04g0234600	-2572	-2568	attcCCAATtcat	1
NF-Y	D	CCAAT	Os04g0234600|Os04g0234600	-1785	-1781	gagaCCAATtcca	1
NF-Y	D	CCAAT	Os04g0234600|Os04g0234600	-1779	-1775	aattCCAATaagg	1
NF-Y	D	CCAAT	Os04g0234600|Os04g0234600	-1742	-1738	tatcCCAATtcaa	1
NF-Y	D	CCAAT	Os04g0234600|Os04g0234600	-152	-148	gaacCCAATagat	1
NF-Y	R	CCAAT	Os04g0234600|Os04g0234600	-2526	-2522	aagaCCAATtcct	1
NF-YB	D	CCACATA	Os04g0234600|Os04g0234600	-2078	-2072	tcgaCCACATAatct	1
NACR	D	CACGCA	Os04g0234600|Os04g0234600	-1340	-1335	atcgCACGCAccta	1
NACR	R	CACGCA	Os04g0234600|Os04g0234600	-284	-279	cctgCACGCAaaac	1
ABRERATCAL	D	MACGYGB	Os04g0234600|Os04g0234600	-2328	-2322	cattAACGCGTgata	1
ABRERATCAL	D	MACGYGB	Os04g0234600|Os04g0234600	-431	-425	tttcCACGCGTatgc	1
ABRERATCAL	R	MACGYGB	Os04g0234600|Os04g0234600	-2327	-2321	ttatCACGCGTtaat	1
MYB1AT	D	WAACCA	Os04g0234600|Os04g0234600	-2710	-2705	acaaTAACCAtata	1
MYB1AT	D	WAACCA	Os04g0234600|Os04g0234600	-1735	-1730	attcAAACCAacaa	1
MYB1AT	D	WAACCA	Os04g0234600|Os04g0234600	-1707	-1702	tatgTAACCAcctt	1
MYB1AT	D	WAACCA	Os04g0234600|Os04g0234600	-69	-64	acacAAACCAcgga	1
MYB1AT	R	WAACCA	Os04g0234600|Os04g0234600	-2912	-2907	acctAAACCAggag	1
MYB1AT	R	WAACCA	Os04g0234600|Os04g0234600	-1072	-1067	aaacTAACCActca	1
MYB1AT	R	WAACCA	Os04g0234600|Os04g0234600	-1008	-1003	tcatAAACCAtaca	1
MYB1AT	R	WAACCA	Os04g0234600|Os04g0234600	-399	-394	gcaaAAACCAcgcc	1
MYBCORE	D	CNGTTR	Os04g0234600|Os04g0234600	-2937	-2932	ttcgCTGTTGaacc	1
MYBCORE	D	CNGTTR	Os04g0234600|Os04g0234600	-1306	-1301	ccaaCAGTTGctga	1
MYBCORE	D	CNGTTR	Os04g0234600|Os04g0234600	-555	-550	ttggCGGTTGtgtg	1
MYBCORE	D	CNGTTR	Os04g0234600|Os04g0234600	-129	-124	tttaCAGTTGctga	1
MYBCORE	D	CNGTTR	Os04g0234600|Os04g0234600	-100	-95	tgagCGGTTGagcg	1
MYBCORE	R	CNGTTR	Os04g0234600|Os04g0234600	-2879	-2874	agaaCTGTTGgaca	1
MYBCORE	R	CNGTTR	Os04g0234600|Os04g0234600	-1309	-1304	gcaaCTGTTGgctc	1
MYBCORE	R	CNGTTR	Os04g0234600|Os04g0234600	-857	-852	atcgCCGTTGctgc	1
MYBCOREATCYCB1	D	AACGG	Os04g0234600|Os04g0234600	-2344	-2340	gaaaAACGGagtg	1
MYBCOREATCYCB1	D	AACGG	Os04g0234600|Os04g0234600	-856	-852	cagcAACGGcgat	1
MYBCOREATCYCB1	D	AACGG	Os04g0234600|Os04g0234600	-406	-402	attaAACGGcgtg	1
MYBCOREATCYCB1	R	AACGG	Os04g0234600|Os04g0234600	-2231	-2227	gctaAACGGtgtg	1
MYBCOREATCYCB1	R	AACGG	Os04g0234600|Os04g0234600	-1391	-1387	aacaAACGGgatt	1
MYBCOREATCYCB1	R	AACGG	Os04g0234600|Os04g0234600	-290	-286	gcaaAACGGagca	1
MYBPLANT	R	MACCWAMC	Os04g0234600|Os04g0234600	-1095	-1088	ttacCACCTAACttcc	1
MYBPZM	D	CCWACC	Os04g0234600|Os04g0234600	-453	-448	gttcCCAACCcctc	1
MYBPZM	R	CCWACC	Os04g0234600|Os04g0234600	-2185	-2180	gttcCCAACCcttc	1
MYBST1	D	GGATA	Os04g0234600|Os04g0234600	-2493	-2489	tgctGGATAgaat	1
MYBST1	D	GGATA	Os04g0234600|Os04g0234600	-2452	-2448	ttttGGATAtgct	1
MYBST1	D	GGATA	Os04g0234600|Os04g0234600	-2012	-2008	cgaaGGATAaggg	1
MYBST1	D	GGATA	Os04g0234600|Os04g0234600	-1772	-1768	ataaGGATActgg	1
MYBST1	D	GGATA	Os04g0234600|Os04g0234600	-1695	-1691	ttctGGATAgaag	1
MYBST1	R	GGATA	Os04g0234600|Os04g0234600	-2839	-2835	gaccGGATAacac	1
MYBST1	R	GGATA	Os04g0234600|Os04g0234600	-1746	-1742	attgGGATAtgca	1
MYBST1	R	GGATA	Os04g0234600|Os04g0234600	-843	-839	tggtGGATAcctc	1
DRECRTCOREAT	R	RCCGAC	Os04g0234600|Os04g0234600	-766	-761	cgttGCCGACctgg	1
START_END	DR	-	Os10g0502400|HEMA1	-3000	-1	-	0
NF-CO	D	CCACA	Os10g0502400|HEMA1	-2672	-2668	ctcaCCACAcgga	1
NF-CO	D	CCACA	Os10g0502400|HEMA1	-1096	-1092	gggcCCACAaggt	1
NF-CO	D	CCACA	Os10g0502400|HEMA1	-1045	-1041	tcggCCACAggag	1
NF-CO	D	CCACA	Os10g0502400|HEMA1	-868	-864	gccaCCACActcc	1
NF-CO	D	CCACA	Os10g0502400|HEMA1	-425	-421	gttcCCACAtgct	1
NF-CO	D	CCACA	Os10g0502400|HEMA1	-99	-95	ggccCCACAcgcc	1
NF-CO	R	CCACA	Os10g0502400|HEMA1	-2635	-2631	catgCCACAgaag	1
NF-CO	R	CCACA	Os10g0502400|HEMA1	-1103	-1099	gggcCCACAtgtc	1
NF-CO	R	CCACA	Os10g0502400|HEMA1	-1079	-1075	gtggCCACActct	1
NF-CO	R	CCACA	Os10g0502400|HEMA1	-903	-899	gctgCCACAttct	1
NF-Y	D	CCAAT	Os10g0502400|HEMA1	-1780	-1776	gagtCCAATagca	1
NF-Y	D	CCAAT	Os10g0502400|HEMA1	-1293	-1289	tttcCCAATtcac	1
NF-Y	D	CCAAT	Os10g0502400|HEMA1	-889	-885	gcagCCAATcaga	1
NF-Y	D	CCAAT	Os10g0502400|HEMA1	-591	-587	cgttCCAATttca	1
NF-Y	D	CCAAT	Os10g0502400|HEMA1	-573	-569	acttCCAATtttg	1
NF-Y	D	CCAAT	Os10g0502400|HEMA1	-339	-335	gaatCCAATcaag	1
NF-Y	D	CCAAT	Os10g0502400|HEMA1	-126	-122	cgagCCAATgcat	1
NF-Y	R	CCAAT	Os10g0502400|HEMA1	-2242	-2238	ggtaCCAATaatt	1
NF-Y	R	CCAAT	Os10g0502400|HEMA1	-2080	-2076	acttCCAATttta	1
NAP	D	TACGT	Os10g0502400|HEMA1	-2831	-2827	caatTACGTagca	1
NAP	R	TACGT	Os10g0502400|HEMA1	-2830	-2826	ctgcTACGTaatt	1
NAP	R	TACGT	Os10g0502400|HEMA1	-517	-513	tcatTACGTggtg	1
NACR	D	CACGCA	Os10g0502400|HEMA1	-1808	-1803	tttcCACGCAcact	1
NACR	R	CACGCA	Os10g0502400|HEMA1	-1011	-1006	ggcaCACGCAgctc	1
NACR	R	CACGCA	Os10g0502400|HEMA1	-109	-104	ggccCACGCAacag	1
ABRELATERD1	D	ACGTG	Os10g0502400|HEMA1	-2512	-2508	taaaACGTGcagg	1
ABRELATERD1	D	ACGTG	Os10g0502400|HEMA1	-1032	-1028	gtggACGTGcgga	1
ABRELATERD1	D	ACGTG	Os10g0502400|HEMA1	-357	-353	tggaACGTGatat	1
ABRELATERD1	R	ACGTG	Os10g0502400|HEMA1	-1265	-1261	aaaaACGTGtatg	1
ABRELATERD1	R	ACGTG	Os10g0502400|HEMA1	-1141	-1137	gaaaACGTGgtgg	1
ABRELATERD1	R	ACGTG	Os10g0502400|HEMA1	-1070	-1066	gtcgACGTGgtgg	1
ABRELATERD1	R	ACGTG	Os10g0502400|HEMA1	-518	-514	cattACGTGgtga	1
ABRERATCAL	D	MACGYGB	Os10g0502400|HEMA1	-2513	-2507	ctaaAACGTGCagga	1
ABRERATCAL	R	MACGYGB	Os10g0502400|HEMA1	-1266	-1260	gaaaAACGTGTatgc	1
ABRERATCAL	R	MACGYGB	Os10g0502400|HEMA1	-1142	-1136	agaaAACGTGGtggt	1
MYB1AT	D	WAACCA	Os10g0502400|HEMA1	-1688	-1683	tcaaAAACCAtttt	1
MYB1AT	D	WAACCA	Os10g0502400|HEMA1	-1669	-1664	agcaAAACCActtg	1
MYB1AT	D	WAACCA	Os10g0502400|HEMA1	-1515	-1510	aatgAAACCAagat	1
MYB1AT	D	WAACCA	Os10g0502400|HEMA1	-1148	-1143	tgatAAACCAccac	1
MYB1AT	D	WAACCA	Os10g0502400|HEMA1	-318	-313	cttcTAACCAaatt	1
MYB1AT	D	WAACCA	Os10g0502400|HEMA1	-84	-79	ggccTAACCAcccc	1
MYB2AT	D	TAACTG	Os10g0502400|HEMA1	-2307	-2302	tgtcTAACTGaaat	1
MYB2AT	R	TAACTG	Os10g0502400|HEMA1	-2886	-2881	ctatTAACTGttag	1
MYBCORE	D	CNGTTR	Os10g0502400|HEMA1	-2886	-2881	ctaaCAGTTAatag	1
MYBCORE	D	CNGTTR	Os10g0502400|HEMA1	-1448	-1443	cgaaCTGTTAaaag	1
MYBCORE	D	CNGTTR	Os10g0502400|HEMA1	-113	-108	cccaCTGTTGcgtg	1
MYBCORE	R	CNGTTR	Os10g0502400|HEMA1	-2889	-2884	ttaaCTGTTAgaag	1
MYBCORE	R	CNGTTR	Os10g0502400|HEMA1	-2872	-2867	tgcaCGGTTGatgg	1
MYBCORE	R	CNGTTR	Os10g0502400|HEMA1	-2821	-2816	acatCTGTTActgc	1
MYBCORE	R	CNGTTR	Os10g0502400|HEMA1	-2307	-2302	atttCAGTTAgaca	1
MYBCORE	R	CNGTTR	Os10g0502400|HEMA1	-1773	-1768	cgcgCCGTTGctat	1
MYBCORE	R	CNGTTR	Os10g0502400|HEMA1	-1741	-1736	aacaCGGTTGcatc	1
MYBCOREATCYCB1	D	AACGG	Os10g0502400|HEMA1	-2604	-2600	ttgaAACGGtcgc	1
MYBCOREATCYCB1	D	AACGG	Os10g0502400|HEMA1	-1772	-1768	tagcAACGGcgcg	1
MYBCOREATCYCB1	D	AACGG	Os10g0502400|HEMA1	-374	-370	gacaAACGGtgac	1
MYBPLANT	D	MACCWAMC	Os10g0502400|HEMA1	-828	-821	ccccCACCAAACccaa	1
MYBPLANT	D	MACCWAMC	Os10g0502400|HEMA1	-583	-576	tttcAACCAAACttcc	1
MYBPZM	D	CCWACC	Os10g0502400|HEMA1	-858	-853	tcccCCTACCctct	1
MYBPZM	D	CCWACC	Os10g0502400|HEMA1	-37	-32	agctCCAACCtttt	1
MYBPZM	R	CCWACC	Os10g0502400|HEMA1	-1482	-1477	gattCCAACCccat	1
MYBST1	D	GGATA	Os10g0502400|HEMA1	-911	-907	tagaGGATAgaat	1
MYBST1	D	GGATA	Os10g0502400|HEMA1	-779	-775	cttgGGATAgtca	1
MYBST1	R	GGATA	Os10g0502400|HEMA1	-1338	-1334	aaaaGGATAagtc	1
DRECRTCOREAT	D	RCCGAC	Os10g0502400|HEMA1	-1110	-1105	cttgACCGACatgt	1
DRECRTCOREAT	R	RCCGAC	Os10g0502400|HEMA1	-1050	-1045	tgtgGCCGACggcc	1
START_END	DR	-	Os04g0459500|Os04g0459500	-3000	-1	-	0
NF-CO	D	CCACA	Os04g0459500|Os04g0459500	-2093	-2089	gagcCCACAataa	1
NF-CO	D	CCACA	Os04g0459500|Os04g0459500	-1688	-1684	attgCCACAatga	1
NF-CO	D	CCACA	Os04g0459500|Os04g0459500	-959	-955	tatcCCACAccac	1
NF-CO	D	CCACA	Os04g0459500|Os04g0459500	-954	-950	cacaCCACAtgtg	1
NF-CO	D	CCACA	Os04g0459500|Os04g0459500	-557	-553	atggCCACAtctc	1
NF-CO	D	CCACA	Os04g0459500|Os04g0459500	-64	-60	cgcaCCACAaacc	1
NF-CO	D	CCACA	Os04g0459500|Os04g0459500	-39	-35	aatcCCACActca	1
NF-CO	R	CCACA	Os04g0459500|Os04g0459500	-2882	-2878	gggcCCACAatca	1
NF-CO	R	CCACA	Os04g0459500|Os04g0459500	-2692	-2688	ctaaCCACAatac	1
NF-CO	R	CCACA	Os04g0459500|Os04g0459500	-2639	-2635	gagtCCACAtata	1
NF-CO	R	CCACA	Os04g0459500|Os04g0459500	-2590	-2586	ggccCCACAtgtc	1
NF-CO	R	CCACA	Os04g0459500|Os04g0459500	-2159	-2155	tgacCCACAcaat	1
NF-CO	R	CCACA	Os04g0459500|Os04g0459500	-176	-172	tcacCCACAcaaa	1
NF-Y	D	CCAAT	Os04g0459500|Os04g0459500	-1256	-1252	tttaCCAATttat	1
NF-Y	D	CCAAT	Os04g0459500|Os04g0459500	-497	-493	tctgCCAATctcg	1
NF-Y	D	CCAAT	Os04g0459500|Os04g0459500	-104	-100	tcgcCCAATccgg	1
NF-Y	D	CCAAT	Os04g0459500|Os04g0459500	-45	-41	gcgcCCAATccca	1
NF-Y	R	CCAAT	Os04g0459500|Os04g0459500	-1896	-1892	tgaaCCAATcaga	1
NF-YB	R	CCACATA	Os04g0459500|Os04g0459500	-2641	-2635	gagtCCACATAtatg	1
NAP	D	TACGT	Os04g0459500|Os04g0459500	-703	-699	gcgcTACGTtggc	1
NAP	D	TACGT	Os04g0459500|Os04g0459500	-136	-132	gccaTACGTtggg	1
NAP	R	TACGT	Os04g0459500|Os04g0459500	-2356	-2352	cgccTACGTggcg	1
NAP	R	TACGT	Os04g0459500|Os04g0459500	-718	-714	ttctTACGTtccg	1
NAP	R	TACGT	Os04g0459500|Os04g0459500	-310	-306	gtagTACGTgata	1
ABRELATERD1	D	ACGTG	Os04g0459500|Os04g0459500	-878	-874	ttaaACGTGtgtt	1
ABRELATERD1	D	ACGTG	Os04g0459500|Os04g0459500	-816	-812	gtgcACGTGtgtt	1
ABRELATERD1	D	ACGTG	Os04g0459500|Os04g0459500	-760	-756	ggcaACGTGggcg	1
ABRELATERD1	D	ACGTG	Os04g0459500|Os04g0459500	-679	-675	agcgACGTGgatg	1
ABRELATERD1	R	ACGTG	Os04g0459500|Os04g0459500	-2357	-2353	gcctACGTGgcgg	1
ABRELATERD1	R	ACGTG	Os04g0459500|Os04g0459500	-2346	-2342	gttgACGTGgcgc	1
ABRELATERD1	R	ACGTG	Os04g0459500|Os04g0459500	-817	-813	acacACGTGcact	1
ABRELATERD1	R	ACGTG	Os04g0459500|Os04g0459500	-311	-307	tagtACGTGatat	1
ABRERATCAL	D	MACGYGB	Os04g0459500|Os04g0459500	-879	-873	cttaAACGTGTgtta	1
ABRERATCAL	D	MACGYGB	Os04g0459500|Os04g0459500	-817	-811	agtgCACGTGTgttt	1
ABRERATCAL	D	MACGYGB	Os04g0459500|Os04g0459500	-761	-755	cggcAACGTGGgcgc	1
ABRERATCAL	R	MACGYGB	Os04g0459500|Os04g0459500	-818	-812	aacaCACGTGCactg	1
ABREATCONSENSUS	R	YACGTGGC	Os04g0459500|Os04g0459500	-2359	-2352	cgccTACGTGGCggca	1
MYB1AT	D	WAACCA	Os04g0459500|Os04g0459500	-1850	-1845	gaagAAACCAgcaa	1
MYB1AT	D	WAACCA	Os04g0459500|Os04g0459500	-1019	-1014	ttcgAAACCAtcgg	1
MYB1AT	R	WAACCA	Os04g0459500|Os04g0459500	-2690	-2685	tatcTAACCAcaat	1
MYB1AT	R	WAACCA	Os04g0459500|Os04g0459500	-2297	-2292	attaAAACCAgtgc	1
MYB1AT	R	WAACCA	Os04g0459500|Os04g0459500	-1490	-1485	gactTAACCAtcac	1
MYB2AT	D	TAACTG	Os04g0459500|Os04g0459500	-1745	-1740	atttTAACTGtgaa	1
MYB2AT	R	TAACTG	Os04g0459500|Os04g0459500	-1732	-1727	atttTAACTGtcat	1
MYBCORE	D	CNGTTR	Os04g0459500|Os04g0459500	-1732	-1727	atgaCAGTTAaaat	1
MYBCORE	D	CNGTTR	Os04g0459500|Os04g0459500	-1672	-1667	aaaaCCGTTGcaat	1
MYBCORE	R	CNGTTR	Os04g0459500|Os04g0459500	-1745	-1740	ttcaCAGTTAaaat	1
MYBCORE	R	CNGTTR	Os04g0459500|Os04g0459500	-1099	-1094	tataCCGTTAgcta	1
MYBCORE	R	CNGTTR	Os04g0459500|Os04g0459500	-1000	-995	ctagCGGTTAaaaa	1
MYBCORE	R	CNGTTR	Os04g0459500|Os04g0459500	-800	-795	ccccCTGTTAcaca	1
MYBCOREATCYCB1	D	AACGG	Os04g0459500|Os04g0459500	-1098	-1094	agctAACGGtata	1
MYBCOREATCYCB1	D	AACGG	Os04g0459500|Os04g0459500	-773	-769	aaagAACGGcagc	1
MYBCOREATCYCB1	D	AACGG	Os04g0459500|Os04g0459500	-240	-236	aaaaAACGGcgga	1
MYBCOREATCYCB1	R	AACGG	Os04g0459500|Os04g0459500	-2111	-2107	tctaAACGGgctc	1
MYBCOREATCYCB1	R	AACGG	Os04g0459500|Os04g0459500	-1672	-1668	ttgcAACGGtttt	1
MYBCOREATCYCB1	R	AACGG	Os04g0459500|Os04g0459500	-1026	-1022	ttcgAACGGcttg	1
MYBPZM	D	CCWACC	Os04g0459500|Os04g0459500	-452	-447	gcagCCAACCttgg	1
MYBST1	D	GGATA	Os04g0459500|Os04g0459500	-2252	-2248	tcagGGATAtgaa	1
MYBST1	D	GGATA	Os04g0459500|Os04g0459500	-1413	-1409	gggaGGATAttga	1
MYBST1	R	GGATA	Os04g0459500|Os04g0459500	-2272	-2268	taccGGATAtctc	1
MYBST1	R	GGATA	Os04g0459500|Os04g0459500	-963	-959	tgtgGGATAtgcg	1
MYBST1	R	GGATA	Os04g0459500|Os04g0459500	-383	-379	tgatGGATAttcg	1
MYBST1	R	GGATA	Os04g0459500|Os04g0459500	-126	-122	tttcGGATAgccc	1
DRECRTCOREAT	D	RCCGAC	Os04g0459500|Os04g0459500	-2584	-2579	tgggGCCGACatgt	1
DRECRTCOREAT	D	RCCGAC	Os04g0459500|Os04g0459500	-511	-506	gtttACCGACgcaa	1
START_END	DR	-	Os08g0104600|Fd1	-3000	-1	-	0
NF-CO	D	CCACA	Os08g0104600|Fd1	-1824	-1820	aacaCCACActcg	1
NF-CO	D	CCACA	Os08g0104600|Fd1	-1248	-1244	cctaCCACAtgaa	1
NF-CO	D	CCACA	Os08g0104600|Fd1	-345	-341	gtgaCCACAcata	1
NF-CO	D	CCACA	Os08g0104600|Fd1	-156	-152	gcgaCCACAcgca	1
NF-CO	R	CCACA	Os08g0104600|Fd1	-2881	-2877	tttaCCACAtgca	1
NF-CO	R	CCACA	Os08g0104600|Fd1	-1403	-1399	ctctCCACAgcta	1
NF-CO	R	CCACA	Os08g0104600|Fd1	-395	-391	ttgtCCACAcata	1
NF-CO	R	CCACA	Os08g0104600|Fd1	-115	-111	accaCCACAcgat	1
NF-Y	D	CCAAT	Os08g0104600|Fd1	-2900	-2896	ttttCCAATatta	1
NF-Y	D	CCAAT	Os08g0104600|Fd1	-1770	-1766	gaaaCCAATagca	1
NF-Y	D	CCAAT	Os08g0104600|Fd1	-733	-729	aagcCCAATaaga	1
NF-Y	D	CCAAT	Os08g0104600|Fd1	-424	-420	aatcCCAATctaa	1
NF-Y	R	CCAAT	Os08g0104600|Fd1	-2330	-2326	ttaaCCAATgagc	1
NF-Y	R	CCAAT	Os08g0104600|Fd1	-2311	-2307	tcaaCCAATaatt	1
NF-Y	R	CCAAT	Os08g0104600|Fd1	-2301	-2297	aattCCAATctca	1
NF-Y	R	CCAAT	Os08g0104600|Fd1	-1319	-1315	caaaCCAATttaa	1
NF-Y	R	CCAAT	Os08g0104600|Fd1	-654	-650	cggcCCAATccgc	1
NF-Y	R	CCAAT	Os08g0104600|Fd1	-243	-239	tgagCCAATcaca	1
NAP	D	TACGT	Os08g0104600|Fd1	-2510	-2506	atggTACGTgttg	1
NAP	D	TACGT	Os08g0104600|Fd1	-2122	-2118	tcggTACGTttgg	1
NAP	D	TACGT	Os08g0104600|Fd1	-1646	-1642	actaTACGTcaat	1
NAP	D	TACGT	Os08g0104600|Fd1	-1450	-1446	gtatTACGTccca	1
NAP	R	TACGT	Os08g0104600|Fd1	-1852	-1848	tatgTACGTttat	1
NAP	R	TACGT	Os08g0104600|Fd1	-1078	-1074	tataTACGTgtat	1
NAP	R	TACGT	Os08g0104600|Fd1	-1013	-1009	tggtTACGTggtc	1
NAP	R	TACGT	Os08g0104600|Fd1	-402	-398	cacaTACGTtgaa	1
NACR	D	CACGCA	Os08g0104600|Fd1	-153	-148	accaCACGCAagac	1
ABRELATERD1	D	ACGTG	Os08g0104600|Fd1	-2618	-2614	ttaaACGTGgttt	1
ABRELATERD1	D	ACGTG	Os08g0104600|Fd1	-2520	-2516	agaaACGTGcatg	1
ABRELATERD1	D	ACGTG	Os08g0104600|Fd1	-2509	-2505	tggtACGTGttgg	1
ABRELATERD1	D	ACGTG	Os08g0104600|Fd1	-1057	-1053	tacaACGTGtttg	1
ABRELATERD1	D	ACGTG	Os08g0104600|Fd1	-1002	-998	caacACGTGgccg	1
ABRELATERD1	D	ACGTG	Os08g0104600|Fd1	-56	-52	cgccACGTGgcac	1
ABRELATERD1	R	ACGTG	Os08g0104600|Fd1	-1079	-1075	atatACGTGtatg	1
ABRELATERD1	R	ACGTG	Os08g0104600|Fd1	-1014	-1010	ggttACGTGgtcc	1
ABRELATERD1	R	ACGTG	Os08g0104600|Fd1	-1003	-999	ggccACGTGttgg	1
ABRELATERD1	R	ACGTG	Os08g0104600|Fd1	-57	-53	tgccACGTGgcga	1
ABRERATCAL	D	MACGYGB	Os08g0104600|Fd1	-2619	-2613	tttaAACGTGGtttc	1
ABRERATCAL	D	MACGYGB	Os08g0104600|Fd1	-2521	-2515	aagaAACGTGCatgg	1
ABRERATCAL	D	MACGYGB	Os08g0104600|Fd1	-1058	-1052	gtacAACGTGTttgt	1
ABRERATCAL	D	MACGYGB	Os08g0104600|Fd1	-1003	-997	ccaaCACGTGGccgg	1
ABRERATCAL	D	MACGYGB	Os08g0104600|Fd1	-57	-51	tcgcCACGTGGcacc	1
ABRERATCAL	R	MACGYGB	Os08g0104600|Fd1	-1004	-998	cggcCACGTGTtggt	1
ABRERATCAL	R	MACGYGB	Os08g0104600|Fd1	-58	-52	gtgcCACGTGGcgag	1
ABREATCONSENSUS	D	YACGTGGC	Os08g0104600|Fd1	-1003	-996	ccaaCACGTGGCcggc	1
ABREATCONSENSUS	D	YACGTGGC	Os08g0104600|Fd1	-57	-50	tcgcCACGTGGCaccc	1
ABREATCONSENSUS	R	YACGTGGC	Os08g0104600|Fd1	-59	-52	gtgcCACGTGGCgagc	1
MYB1AT	D	WAACCA	Os08g0104600|Fd1	-2691	-2686	aaaaAAACCAcgag	1
MYB1AT	D	WAACCA	Os08g0104600|Fd1	-1773	-1768	acagAAACCAatag	1
MYB1AT	D	WAACCA	Os08g0104600|Fd1	-1010	-1005	cacgTAACCAacac	1
MYB1AT	R	WAACCA	Os08g0104600|Fd1	-2833	-2828	tttaAAACCAacaa	1
MYB1AT	R	WAACCA	Os08g0104600|Fd1	-2615	-2610	gaagAAACCAcgtt	1
MYB1AT	R	WAACCA	Os08g0104600|Fd1	-2328	-2323	caatTAACCAatga	1
MYB1AT	R	WAACCA	Os08g0104600|Fd1	-2139	-2134	ggtcAAACCAggga	1
MYB1AT	R	WAACCA	Os08g0104600|Fd1	-2068	-2063	aactAAACCAggcc	1
MYB1AT	R	WAACCA	Os08g0104600|Fd1	-1317	-1312	caacAAACCAattt	1
MYB2AT	R	TAACTG	Os08g0104600|Fd1	-1132	-1127	gagaTAACTGgagt	1
MYBCORE	D	CNGTTR	Os08g0104600|Fd1	-1603	-1598	ttttCGGTTGtaaa	1
MYBCORE	D	CNGTTR	Os08g0104600|Fd1	-1147	-1142	gcagCAGTTGatac	1
MYBCORE	D	CNGTTR	Os08g0104600|Fd1	-1132	-1127	actcCAGTTAtctc	1
MYBCORE	R	CNGTTR	Os08g0104600|Fd1	-2564	-2559	gatcCAGTTGcctt	1
MYBPLANT	R	MACCWAMC	Os08g0104600|Fd1	-549	-542	aactAACCTAACctct	1
MYBPZM	D	CCWACC	Os08g0104600|Fd1	-1252	-1247	tagtCCTACCacat	1
MYBPZM	D	CCWACC	Os08g0104600|Fd1	-76	-71	taagCCAACCagtc	1
MYBPZM	R	CCWACC	Os08g0104600|Fd1	-2454	-2449	gcggCCTACCcttt	1
MYBST1	D	GGATA	Os08g0104600|Fd1	-2577	-2573	tgtcGGATAaaag	1
MYBST1	D	GGATA	Os08g0104600|Fd1	-2291	-2287	atttGGATAgggc	1
MYBST1	D	GGATA	Os08g0104600|Fd1	-1460	-1456	gcacGGATAtgta	1
MYBST1	R	GGATA	Os08g0104600|Fd1	-2485	-2481	cccaGGATAtata	1
DRECRTCOREAT	R	RCCGAC	Os08g0104600|Fd1	-2127	-2122	acgtACCGACacgg	1
START_END	DR	-	Os03g0850400|Os03g0850400	-3000	-1	-	0
NF-CO	D	CCACA	Os03g0850400|Os03g0850400	-2288	-2284	taatCCACAagtc	1
NF-CO	D	CCACA	Os03g0850400|Os03g0850400	-2197	-2193	gagtCCACAatat	1
NF-CO	D	CCACA	Os03g0850400|Os03g0850400	-1219	-1215	atatCCACAgtgt	1
NF-CO	D	CCACA	Os03g0850400|Os03g0850400	-947	-943	caatCCACAcaac	1
NF-CO	D	CCACA	Os03g0850400|Os03g0850400	-244	-240	cccaCCACAcacg	1
NF-CO	R	CCACA	Os03g0850400|Os03g0850400	-2776	-2772	gtggCCACAggaa	1
NF-Y	D	CCAAT	Os03g0850400|Os03g0850400	-2628	-2624	tgggCCAATgtac	1
NF-Y	D	CCAAT	Os03g0850400|Os03g0850400	-2095	-2091	agtgCCAATagtt	1
NF-Y	D	CCAAT	Os03g0850400|Os03g0850400	-1617	-1613	ttttCCAATgcta	1
NF-Y	D	CCAAT	Os03g0850400|Os03g0850400	-1184	-1180	tcttCCAATtcaa	1
NF-Y	D	CCAAT	Os03g0850400|Os03g0850400	-556	-552	ttccCCAATtaaa	1
NF-Y	D	CCAAT	Os03g0850400|Os03g0850400	-485	-481	catgCCAATgctt	1
NF-Y	D	CCAAT	Os03g0850400|Os03g0850400	-365	-361	ttaaCCAATcata	1
NF-Y	R	CCAAT	Os03g0850400|Os03g0850400	-2941	-2937	aaatCCAATcaaa	1
NF-Y	R	CCAAT	Os03g0850400|Os03g0850400	-2686	-2682	tgtgCCAATggca	1
NF-Y	R	CCAAT	Os03g0850400|Os03g0850400	-2426	-2422	agacCCAATactg	1
NF-Y	R	CCAAT	Os03g0850400|Os03g0850400	-919	-915	agtgCCAATgttt	1
NAP	R	TACGT	Os03g0850400|Os03g0850400	-331	-327	ttccTACGTccca	1
ABRELATERD1	D	ACGTG	Os03g0850400|Os03g0850400	-2985	-2981	gttcACGTGgtcc	1
ABRELATERD1	R	ACGTG	Os03g0850400|Os03g0850400	-2986	-2982	gaccACGTGaact	1
ABRELATERD1	R	ACGTG	Os03g0850400|Os03g0850400	-239	-235	agcgACGTGtgtg	1
ABRERATCAL	D	MACGYGB	Os03g0850400|Os03g0850400	-2986	-2980	agttCACGTGGtcct	1
MYB1AT	D	WAACCA	Os03g0850400|Os03g0850400	-1462	-1457	ttttTAACCAgctg	1
MYB1AT	D	WAACCA	Os03g0850400|Os03g0850400	-1162	-1157	cataAAACCAaaaa	1
MYB1AT	D	WAACCA	Os03g0850400|Os03g0850400	-368	-363	tggtTAACCAatca	1
MYB1AT	R	WAACCA	Os03g0850400|Os03g0850400	-372	-367	tggtTAACCAtttt	1
MYB2AT	R	TAACTG	Os03g0850400|Os03g0850400	-1000	-995	aatgTAACTGttat	1
MYB2AT	R	TAACTG	Os03g0850400|Os03g0850400	-784	-779	tcccTAACTGtcta	1
MYBCORE	D	CNGTTR	Os03g0850400|Os03g0850400	-2953	-2948	aaacCTGTTGattt	1
MYBCORE	D	CNGTTR	Os03g0850400|Os03g0850400	-2555	-2550	tataCCGTTGtttt	1
MYBCORE	D	CNGTTR	Os03g0850400|Os03g0850400	-2247	-2242	gacgCAGTTGcaga	1
MYBCORE	D	CNGTTR	Os03g0850400|Os03g0850400	-2069	-2064	ttcaCGGTTGtctg	1
MYBCORE	D	CNGTTR	Os03g0850400|Os03g0850400	-1961	-1956	ttttCTGTTGatca	1
MYBCORE	D	CNGTTR	Os03g0850400|Os03g0850400	-1557	-1552	aagaCGGTTAtaaa	1
MYBCORE	D	CNGTTR	Os03g0850400|Os03g0850400	-1499	-1494	ggggCAGTTGctaa	1
MYBCORE	D	CNGTTR	Os03g0850400|Os03g0850400	-1386	-1381	tgcaCCGTTGcgat	1
MYBCORE	D	CNGTTR	Os03g0850400|Os03g0850400	-1000	-995	ataaCAGTTAcatt	1
MYBCORE	D	CNGTTR	Os03g0850400|Os03g0850400	-784	-779	tagaCAGTTAggga	1
MYBCORE	D	CNGTTR	Os03g0850400|Os03g0850400	-599	-594	catcCGGTTAaaca	1
MYBCORE	R	CNGTTR	Os03g0850400|Os03g0850400	-2820	-2815	acacCCGTTGtttg	1
MYBCORE	R	CNGTTR	Os03g0850400|Os03g0850400	-2323	-2318	caaaCTGTTAggcc	1
MYBCORE	R	CNGTTR	Os03g0850400|Os03g0850400	-2135	-2130	aactCTGTTAgtat	1
MYBCORE	R	CNGTTR	Os03g0850400|Os03g0850400	-1003	-998	gtaaCTGTTAtttg	1
MYBCORE	R	CNGTTR	Os03g0850400|Os03g0850400	-72	-67	cgggCCGTTGggtt	1
MYBCOREATCYCB1	D	AACGG	Os03g0850400|Os03g0850400	-2819	-2815	aaacAACGGgtgt	1
MYBCOREATCYCB1	D	AACGG	Os03g0850400|Os03g0850400	-71	-67	acccAACGGcccg	1
MYBCOREATCYCB1	R	AACGG	Os03g0850400|Os03g0850400	-2555	-2551	aaacAACGGtata	1
MYBCOREATCYCB1	R	AACGG	Os03g0850400|Os03g0850400	-1386	-1382	tcgcAACGGtgca	1
MYBCOREATCYCB1	R	AACGG	Os03g0850400|Os03g0850400	-48	-44	gggaAACGGacgg	1
MYBPLANT	R	MACCWAMC	Os03g0850400|Os03g0850400	-1118	-1111	aatgCACCAAACgaaa	1
MYBPZM	D	CCWACC	Os03g0850400|Os03g0850400	-2274	-2269	agctCCAACCagca	1
MYBPZM	D	CCWACC	Os03g0850400|Os03g0850400	-9	-4	cactCCAACCtcc	1
MYBST1	D	GGATA	Os03g0850400|Os03g0850400	-2838	-2834	ggatGGATAtttc	1
MYBST1	R	GGATA	Os03g0850400|Os03g0850400	-1222	-1218	ctgtGGATAtaat	1
START_END	DR	-	Os01g0803200|Oc1*	-3000	-1	-	0
NF-CO	D	CCACA	Os01g0803200|Oc1*	-2885	-2881	cctaCCACAgcag	1
NF-CO	D	CCACA	Os01g0803200|Oc1*	-2167	-2163	atcaCCACAaccc	1
NF-CO	D	CCACA	Os01g0803200|Oc1*	-1901	-1897	gatgCCACAtaca	1
NF-CO	D	CCACA	Os01g0803200|Oc1*	-1879	-1875	tatgCCACAtcag	1
NF-CO	D	CCACA	Os01g0803200|Oc1*	-268	-264	tcagCCACAtaca	1
NF-CO	R	CCACA	Os01g0803200|Oc1*	-2135	-2131	aatgCCACAtcag	1
NF-CO	R	CCACA	Os01g0803200|Oc1*	-1888	-1884	cataCCACAcgga	1
NF-CO	R	CCACA	Os01g0803200|Oc1*	-1835	-1831	atcgCCACAgccc	1
NF-CO	R	CCACA	Os01g0803200|Oc1*	-763	-759	gaaaCCACAtgac	1
NF-CO	R	CCACA	Os01g0803200|Oc1*	-650	-646	catgCCACAttgc	1
NF-Y	D	CCAAT	Os01g0803200|Oc1*	-1681	-1677	aaaaCCAATaact	1
NF-Y	D	CCAAT	Os01g0803200|Oc1*	-1595	-1591	agaaCCAATaagc	1
NF-Y	D	CCAAT	Os01g0803200|Oc1*	-210	-206	ataaCCAATgata	1
NF-Y	R	CCAAT	Os01g0803200|Oc1*	-2980	-2976	cgttCCAATctgt	1
NF-Y	R	CCAAT	Os01g0803200|Oc1*	-2588	-2584	taggCCAATccga	1
NF-Y	R	CCAAT	Os01g0803200|Oc1*	-1651	-1647	aggcCCAATaaaa	1
NF-Y	R	CCAAT	Os01g0803200|Oc1*	-533	-529	ggcaCCAATttgg	1
NF-YB	D	CCACATA	Os01g0803200|Oc1*	-1901	-1895	gatgCCACATAcatc	1
NF-YB	D	CCACATA	Os01g0803200|Oc1*	-268	-262	tcagCCACATAcagc	1
NACR	R	CACGCA	Os01g0803200|Oc1*	-2462	-2457	gactCACGCActcc	1
NACR	R	CACGCA	Os01g0803200|Oc1*	-840	-835	gcaaCACGCActaa	1
ABRELATERD1	D	ACGTG	Os01g0803200|Oc1*	-2942	-2938	gataACGTGttgt	1
ABRELATERD1	D	ACGTG	Os01g0803200|Oc1*	-2376	-2372	aatcACGTGgtaa	1
ABRELATERD1	D	ACGTG	Os01g0803200|Oc1*	-2118	-2114	atagACGTGacat	1
ABRELATERD1	D	ACGTG	Os01g0803200|Oc1*	-341	-337	ggtgACGTGacga	1
ABRELATERD1	D	ACGTG	Os01g0803200|Oc1*	-78	-74	cgtgACGTGatac	1
ABRELATERD1	R	ACGTG	Os01g0803200|Oc1*	-2377	-2373	taccACGTGattc	1
ABRERATCAL	D	MACGYGB	Os01g0803200|Oc1*	-2943	-2937	tgatAACGTGTtgta	1
ABRERATCAL	D	MACGYGB	Os01g0803200|Oc1*	-2928	-2922	aaccAACGCGCctat	1
ABRERATCAL	D	MACGYGB	Os01g0803200|Oc1*	-2377	-2371	gaatCACGTGGtaag	1
ABRERATCAL	D	MACGYGB	Os01g0803200|Oc1*	-446	-440	ggatAACGCGTactc	1
MYB1AT	D	WAACCA	Os01g0803200|Oc1*	-2933	-2928	ttgtAAACCAacgc	1
MYB1AT	D	WAACCA	Os01g0803200|Oc1*	-1692	-1687	cacaAAACCAtaaa	1
MYB1AT	D	WAACCA	Os01g0803200|Oc1*	-1684	-1679	cataAAACCAataa	1
MYB1AT	D	WAACCA	Os01g0803200|Oc1*	-213	-208	gcaaTAACCAatga	1
MYB1AT	R	WAACCA	Os01g0803200|Oc1*	-761	-756	aacgAAACCAcatg	1
MYB2AT	R	TAACTG	Os01g0803200|Oc1*	-1915	-1910	atctTAACTGaaaa	1
MYBCORE	D	CNGTTR	Os01g0803200|Oc1*	-1915	-1910	ttttCAGTTAagat	1
MYBCORE	D	CNGTTR	Os01g0803200|Oc1*	-692	-687	ccaaCGGTTAagct	1
MYBCORE	R	CNGTTR	Os01g0803200|Oc1*	-695	-690	ttaaCCGTTGgttc	1
MYBCORE	R	CNGTTR	Os01g0803200|Oc1*	-49	-44	tcgcCAGTTGccag	1
MYBCORE	R	CNGTTR	Os01g0803200|Oc1*	-8	-3	agCGGTTGgaac	1
MYBCOREATCYCB1	D	AACGG	Os01g0803200|Oc1*	-886	-882	ctcaAACGGgcca	1
MYBCOREATCYCB1	D	AACGG	Os01g0803200|Oc1*	-694	-690	aaccAACGGttaa	1
MYBPZM	D	CCWACC	Os01g0803200|Oc1*	-2889	-2884	tgtcCCTACCacag	1
MYBPZM	D	CCWACC	Os01g0803200|Oc1*	-2676	-2671	taagCCAACCatta	1
MYBPZM	D	CCWACC	Os01g0803200|Oc1*	-9	-4	ggttCCAACCgct	1
MYBST1	D	GGATA	Os01g0803200|Oc1*	-1436	-1432	ctttGGATAataa	1
MYBST1	D	GGATA	Os01g0803200|Oc1*	-450	-446	atccGGATAacgc	1
MYBST1	R	GGATA	Os01g0803200|Oc1*	-455	-451	atccGGATAacga	1
DRECRTCOREAT	D	RCCGAC	Os01g0803200|Oc1*	-140	-135	caccACCGACgttg	1
DRECRTCOREAT	R	RCCGAC	Os01g0803200|Oc1*	-2443	-2438	gcatACCGACatga	1
DRECRTCOREAT	R	RCCGAC	Os01g0803200|Oc1*	-2222	-2217	aatgACCGACcgtg	1
START_END	DR	-	Os03g0744700|Os03g0744700	-3000	-1	-	0
NF-CO	D	CCACA	Os03g0744700|Os03g0744700	-2994	-2990	ggacCCACAtgtg	1
NF-CO	D	CCACA	Os03g0744700|Os03g0744700	-2978	-2974	ggacCCACAtgtc	1
NF-CO	D	CCACA	Os03g0744700|Os03g0744700	-2665	-2661	ggtcCCACAacta	1
NF-CO	D	CCACA	Os03g0744700|Os03g0744700	-2372	-2368	actgCCACAtaaa	1
NF-CO	R	CCACA	Os03g0744700|Os03g0744700	-1399	-1395	taatCCACAcagc	1
NF-CO	R	CCACA	Os03g0744700|Os03g0744700	-143	-139	ggggCCACAataa	1
NF-Y	D	CCAAT	Os03g0744700|Os03g0744700	-2922	-2918	aatcCCAATcctc	1
NF-Y	D	CCAAT	Os03g0744700|Os03g0744700	-2422	-2418	ctggCCAATctca	1
NF-Y	D	CCAAT	Os03g0744700|Os03g0744700	-1461	-1457	atctCCAATgcaa	1
NF-Y	D	CCAAT	Os03g0744700|Os03g0744700	-798	-794	tagaCCAATtctg	1
NF-Y	R	CCAAT	Os03g0744700|Os03g0744700	-2189	-2185	atacCCAATggaa	1
NF-Y	R	CCAAT	Os03g0744700|Os03g0744700	-1961	-1957	aattCCAATacaa	1
NF-Y	R	CCAAT	Os03g0744700|Os03g0744700	-1897	-1893	atttCCAATctat	1
NF-Y	R	CCAAT	Os03g0744700|Os03g0744700	-944	-940	ctcaCCAATgctg	1
NF-Y	R	CCAAT	Os03g0744700|Os03g0744700	-372	-368	gaagCCAATtctc	1
NF-YB	D	CCACATA	Os03g0744700|Os03g0744700	-2372	-2366	actgCCACATAaata	1
NAP	R	TACGT	Os03g0744700|Os03g0744700	-57	-53	taaaTACGTggag	1
NACR	R	CACGCA	Os03g0744700|Os03g0744700	-1410	-1405	agcaCACGCAcaat	1
ABRELATERD1	R	ACGTG	Os03g0744700|Os03g0744700	-2712	-2708	gttaACGTGtctt	1
ABRELATERD1	R	ACGTG	Os03g0744700|Os03g0744700	-1331	-1327	gcaaACGTGtcaa	1
ABRELATERD1	R	ACGTG	Os03g0744700|Os03g0744700	-781	-777	tcaaACGTGttaa	1
ABRELATERD1	R	ACGTG	Os03g0744700|Os03g0744700	-58	-54	aaatACGTGgagg	1
ABRERATCAL	R	MACGYGB	Os03g0744700|Os03g0744700	-2713	-2707	cgttAACGTGTctta	1
ABRERATCAL	R	MACGYGB	Os03g0744700|Os03g0744700	-1332	-1326	agcaAACGTGTcaac	1
ABRERATCAL	R	MACGYGB	Os03g0744700|Os03g0744700	-782	-776	gtcaAACGTGTtaag	1
MYB1AT	D	WAACCA	Os03g0744700|Os03g0744700	-2894	-2889	aaatTAACCAcctg	1
MYB1AT	D	WAACCA	Os03g0744700|Os03g0744700	-2738	-2733	atatAAACCAgtcc	1
MYB1AT	D	WAACCA	Os03g0744700|Os03g0744700	-2457	-2452	tccaAAACCAgcac	1
MYB1AT	D	WAACCA	Os03g0744700|Os03g0744700	-1732	-1727	ctaaTAACCAaagg	1
MYB1AT	D	WAACCA	Os03g0744700|Os03g0744700	-324	-319	aaacAAACCAaaaa	1
MYB1AT	R	WAACCA	Os03g0744700|Os03g0744700	-1817	-1812	ctttAAACCActaa	1
MYB1AT	R	WAACCA	Os03g0744700|Os03g0744700	-1653	-1648	tgatTAACCAtcat	1
MYB1AT	R	WAACCA	Os03g0744700|Os03g0744700	-627	-622	aacgAAACCAaaaa	1
MYB2AT	D	TAACTG	Os03g0744700|Os03g0744700	-2872	-2867	attgTAACTGttcc	1
MYBCORE	D	CNGTTR	Os03g0744700|Os03g0744700	-1610	-1605	taatCGGTTGcttt	1
MYBCORE	R	CNGTTR	Os03g0744700|Os03g0744700	-2872	-2867	ggaaCAGTTAcaat	1
MYBCORE	R	CNGTTR	Os03g0744700|Os03g0744700	-2707	-2702	accaCCGTTAacgt	1
MYBCORE	R	CNGTTR	Os03g0744700|Os03g0744700	-36	-31	gaagCGGTTGaagt	1
MYBCOREATCYCB1	D	AACGG	Os03g0744700|Os03g0744700	-2706	-2702	cgttAACGGtggt	1
MYBCOREATCYCB1	D	AACGG	Os03g0744700|Os03g0744700	-1530	-1526	accaAACGGagcc	1
MYBCOREATCYCB1	R	AACGG	Os03g0744700|Os03g0744700	-1702	-1698	tttaAACGGataa	1
MYBPLANT	R	MACCWAMC	Os03g0744700|Os03g0744700	-1387	-1380	cattCACCAACCagat	1
MYBPLANT	R	MACCWAMC	Os03g0744700|Os03g0744700	-650	-643	aggaAACCTAACcctc	1
MYBPZM	R	CCWACC	Os03g0744700|Os03g0744700	-2118	-2113	aatcCCAACCcata	1
MYBPZM	R	CCWACC	Os03g0744700|Os03g0744700	-1387	-1382	ttcaCCAACCagat	1
MYBST1	D	GGATA	Os03g0744700|Os03g0744700	-2253	-2249	caaaGGATAtgta	1
MYBST1	D	GGATA	Os03g0744700|Os03g0744700	-901	-897	gtatGGATAtcac	1
MYBST1	R	GGATA	Os03g0744700|Os03g0744700	-1705	-1701	aaacGGATAaagt	1
START_END	DR	-	Os05g0439400|OsPUB44	-3000	-1	-	0
NF-CO	D	CCACA	Os05g0439400|OsPUB44	-2891	-2887	gattCCACAtcgt	1
NF-CO	D	CCACA	Os05g0439400|OsPUB44	-2855	-2851	gtggCCACAtttc	1
NF-CO	D	CCACA	Os05g0439400|OsPUB44	-2111	-2107	tgttCCACAaaaa	1
NF-CO	D	CCACA	Os05g0439400|OsPUB44	-1945	-1941	acaaCCACAtaaa	1
NF-CO	D	CCACA	Os05g0439400|OsPUB44	-1109	-1105	cttaCCACAtgtc	1
NF-CO	D	CCACA	Os05g0439400|OsPUB44	-936	-932	attgCCACAttaa	1
NF-CO	D	CCACA	Os05g0439400|OsPUB44	-415	-411	cctaCCACAattt	1
NF-CO	R	CCACA	Os05g0439400|OsPUB44	-2837	-2833	cgagCCACAagaa	1
NF-CO	R	CCACA	Os05g0439400|OsPUB44	-661	-657	tttcCCACAattt	1
NF-Y	D	CCAAT	Os05g0439400|OsPUB44	-2916	-2912	ccgaCCAATcatg	1
NF-Y	D	CCAAT	Os05g0439400|OsPUB44	-1404	-1400	tgagCCAATaaat	1
NF-Y	D	CCAAT	Os05g0439400|OsPUB44	-1375	-1371	tgatCCAATaaaa	1
NF-Y	R	CCAAT	Os05g0439400|OsPUB44	-2036	-2032	gataCCAATcatt	1
NF-Y	R	CCAAT	Os05g0439400|OsPUB44	-1177	-1173	tccaCCAATttta	1
NF-Y	R	CCAAT	Os05g0439400|OsPUB44	-207	-203	gatgCCAATataa	1
NF-YB	D	CCACATA	Os05g0439400|OsPUB44	-1945	-1939	acaaCCACATAaaat	1
NAP	D	TACGT	Os05g0439400|OsPUB44	-2630	-2626	aaagTACGTgtta	1
NAP	D	TACGT	Os05g0439400|OsPUB44	-1273	-1269	ccttTACGTatgc	1
NAP	D	TACGT	Os05g0439400|OsPUB44	-1132	-1128	aagcTACGTgcgc	1
NAP	R	TACGT	Os05g0439400|OsPUB44	-2764	-2760	tgcgTACGTgcac	1
NAP	R	TACGT	Os05g0439400|OsPUB44	-1272	-1268	agcaTACGTaaag	1
NACR	D	CACGCA	Os05g0439400|OsPUB44	-2757	-2752	tacgCACGCAcgca	1
NACR	D	CACGCA	Os05g0439400|OsPUB44	-2749	-2744	cacgCACGCAcgca	1
NACR	D	CACGCA	Os05g0439400|OsPUB44	-275	-270	actgCACGCAcgtt	1
NACR	D	CACGCA	Os05g0439400|OsPUB44	-229	-224	cggcCACGCAgaaa	1
ABRELATERD1	D	ACGTG	Os05g0439400|OsPUB44	-2629	-2625	aagtACGTGttag	1
ABRELATERD1	D	ACGTG	Os05g0439400|OsPUB44	-1131	-1127	agctACGTGcgca	1
ABRELATERD1	R	ACGTG	Os05g0439400|OsPUB44	-2765	-2761	gcgtACGTGcaca	1
ABRELATERD1	R	ACGTG	Os05g0439400|OsPUB44	-271	-267	tccaACGTGcgtg	1
ABRERATCAL	D	MACGYGB	Os05g0439400|OsPUB44	-237	-231	ggccCACGCGGccac	1
ABRERATCAL	R	MACGYGB	Os05g0439400|OsPUB44	-272	-266	ttccAACGTGCgtgc	1
MYB1AT	D	WAACCA	Os05g0439400|OsPUB44	-2024	-2019	ctagAAACCAactg	1
MYB1AT	D	WAACCA	Os05g0439400|OsPUB44	-2012	-2007	tgatAAACCAtttt	1
MYB1AT	R	WAACCA	Os05g0439400|OsPUB44	-646	-641	attcTAACCAgtga	1
MYBCORE	D	CNGTTR	Os05g0439400|OsPUB44	-66	-61	ttgaCCGTTGactc	1
MYBCORE	R	CNGTTR	Os05g0439400|OsPUB44	-2020	-2015	ttatCAGTTGgttt	1
MYBCORE	R	CNGTTR	Os05g0439400|OsPUB44	-471	-466	tgttCAGTTGaaat	1
MYBCORE	R	CNGTTR	Os05g0439400|OsPUB44	-386	-381	tgttCAGTTGaaat	1
MYBCOREATCYCB1	R	AACGG	Os05g0439400|OsPUB44	-2584	-2580	tgcaAACGGaaaa	1
MYBCOREATCYCB1	R	AACGG	Os05g0439400|OsPUB44	-66	-62	agtcAACGGtcaa	1
MYBPLANT	D	MACCWAMC	Os05g0439400|OsPUB44	-317	-310	atagAACCAAACgagc	1
MYBPZM	D	CCWACC	Os05g0439400|OsPUB44	-2446	-2441	ttgaCCAACCtttt	1
MYBPZM	D	CCWACC	Os05g0439400|OsPUB44	-419	-414	acatCCTACCacaa	1
MYBST1	D	GGATA	Os05g0439400|OsPUB44	-2222	-2218	cataGGATAaaag	1
MYBST1	D	GGATA	Os05g0439400|OsPUB44	-1171	-1167	tggtGGATActag	1
MYBST1	D	GGATA	Os05g0439400|OsPUB44	-1017	-1013	tctcGGATAagaa	1
MYBST1	R	GGATA	Os05g0439400|OsPUB44	-2505	-2501	aaagGGATAaagg	1
MYBST1	R	GGATA	Os05g0439400|OsPUB44	-1745	-1741	ttaaGGATAagat	1
DRECRTCOREAT	D	RCCGAC	Os05g0439400|OsPUB44	-2921	-2916	tcgcGCCGACcaat	1
START_END	DR	-	Os08g0434300|MDH	-3000	-1	-	0
NF-CO	D	CCACA	Os08g0434300|MDH	-2891	-2887	agggCCACAtctc	1
NF-CO	D	CCACA	Os08g0434300|MDH	-2071	-2067	tataCCACAtaaa	1
NF-CO	D	CCACA	Os08g0434300|MDH	-1647	-1643	taaaCCACAgaat	1
NF-CO	D	CCACA	Os08g0434300|MDH	-1604	-1600	caaaCCACAgaat	1
NF-CO	R	CCACA	Os08g0434300|MDH	-646	-642	tcttCCACAccaa	1
NF-Y	D	CCAAT	Os08g0434300|MDH	-2873	-2869	agtaCCAATctta	1
NF-Y	D	CCAAT	Os08g0434300|MDH	-1881	-1877	tagcCCAATgacg	1
NF-Y	D	CCAAT	Os08g0434300|MDH	-1352	-1348	acgaCCAATccgg	1
NF-Y	D	CCAAT	Os08g0434300|MDH	-524	-520	atatCCAATatta	1
NF-Y	D	CCAAT	Os08g0434300|MDH	-419	-415	aagcCCAATtatc	1
NF-Y	D	CCAAT	Os08g0434300|MDH	-175	-171	gttgCCAATctgt	1
NF-Y	D	CCAAT	Os08g0434300|MDH	-153	-149	ctcaCCAATataa	1
NF-Y	R	CCAAT	Os08g0434300|MDH	-2379	-2375	catcCCAATggtg	1
NF-Y	R	CCAAT	Os08g0434300|MDH	-1283	-1279	cgatCCAATcttg	1
NF-Y	R	CCAAT	Os08g0434300|MDH	-1272	-1268	ggagCCAATctcg	1
NF-YB	D	CCACATA	Os08g0434300|MDH	-2071	-2065	tataCCACATAaaaa	1
NAP	R	TACGT	Os08g0434300|MDH	-1875	-1871	acaaTACGTcatt	1
NACR	D	CACGCA	Os08g0434300|MDH	-1570	-1565	gatcCACGCAgtgc	1
NACR	D	CACGCA	Os08g0434300|MDH	-1396	-1391	aaccCACGCAtccc	1
NACR	R	CACGCA	Os08g0434300|MDH	-1219	-1214	aaagCACGCAgcca	1
ABRERATCAL	R	MACGYGB	Os08g0434300|MDH	-1239	-1233	gaacCACGCGCgaac	1
MYB1AT	D	WAACCA	Os08g0434300|MDH	-1650	-1645	cactAAACCAcaga	1
MYB1AT	D	WAACCA	Os08g0434300|MDH	-1607	-1602	caccAAACCAcaga	1
MYB1AT	D	WAACCA	Os08g0434300|MDH	-917	-912	ttggAAACCAtttt	1
MYB1AT	R	WAACCA	Os08g0434300|MDH	-1179	-1174	caacAAACCAacca	1
MYB1AT	R	WAACCA	Os08g0434300|MDH	-1014	-1009	tcccAAACCAtggt	1
MYB1AT	R	WAACCA	Os08g0434300|MDH	-734	-729	tttgAAACCAggtg	1
MYB1AT	R	WAACCA	Os08g0434300|MDH	-590	-585	agtaAAACCAcctc	1
MYB2AT	R	TAACTG	Os08g0434300|MDH	-668	-663	ttccTAACTGcgta	1
MYB2AT	R	TAACTG	Os08g0434300|MDH	-131	-126	ttttTAACTGcagg	1
MYBCORE	D	CNGTTR	Os08g0434300|MDH	-1539	-1534	aagcCCGTTGtttc	1
MYBCORE	D	CNGTTR	Os08g0434300|MDH	-855	-850	tgtgCTGTTAaatc	1
MYBCORE	D	CNGTTR	Os08g0434300|MDH	-668	-663	tacgCAGTTAggaa	1
MYBCORE	D	CNGTTR	Os08g0434300|MDH	-451	-446	atttCTGTTGagtg	1
MYBCORE	D	CNGTTR	Os08g0434300|MDH	-437	-432	atccCTGTTGtgtg	1
MYBCORE	D	CNGTTR	Os08g0434300|MDH	-131	-126	cctgCAGTTAaaaa	1
MYBCORE	D	CNGTTR	Os08g0434300|MDH	-112	-107	tcagCTGTTAccat	1
MYBCORE	D	CNGTTR	Os08g0434300|MDH	-97	-92	agttCGGTTGgcgc	1
MYBCORE	D	CNGTTR	Os08g0434300|MDH	-16	-11	tcatCCGTTAgctt	1
MYBCORE	R	CNGTTR	Os08g0434300|MDH	-2999	-2994	caaaCTGTTAa	1
MYBCORE	R	CNGTTR	Os08g0434300|MDH	-1250	-1245	aacaCGGTTAgaca	1
MYBCOREATCYCB1	R	AACGG	Os08g0434300|MDH	-1539	-1535	aaacAACGGgctt	1
MYBCOREATCYCB1	R	AACGG	Os08g0434300|MDH	-16	-12	agctAACGGatga	1
MYBPLANT	D	MACCWAMC	Os08g0434300|MDH	-1611	-1604	aggaCACCAAACcaca	1
MYBPLANT	R	MACCWAMC	Os08g0434300|MDH	-1186	-1179	aaccAACCAACCacgg	1
MYBPZM	D	CCWACC	Os08g0434300|MDH	-1402	-1397	aacgCCAACCcacg	1
MYBPZM	D	CCWACC	Os08g0434300|MDH	-1312	-1307	tcctCCTACCtctt	1
MYBPZM	R	CCWACC	Os08g0434300|MDH	-1186	-1181	ccaaCCAACCacgg	1
MYBPZM	R	CCWACC	Os08g0434300|MDH	-1089	-1084	atatCCTACCagca	1
MYBPZM	R	CCWACC	Os08g0434300|MDH	-96	-91	agcgCCAACCgaac	1
MYBST1	D	GGATA	Os08g0434300|MDH	-2958	-2954	gagaGGATAgaaa	1
MYBST1	D	GGATA	Os08g0434300|MDH	-1085	-1081	ggtaGGATAtatg	1
MYBST1	R	GGATA	Os08g0434300|MDH	-2943	-2939	gttcGGATAcccc	1
MYBST1	R	GGATA	Os08g0434300|MDH	-2310	-2306	aataGGATAaatc	1
MYBST1	R	GGATA	Os08g0434300|MDH	-527	-523	tattGGATAtcta	1
MYBST1	R	GGATA	Os08g0434300|MDH	-490	-486	taatGGATAcatg	1
MYBST1	R	GGATA	Os08g0434300|MDH	-483	-479	tcagGGATAatgg	1
DRECRTCOREAT	D	RCCGAC	Os08g0434300|MDH	-2413	-2408	atatACCGACgact	1
DRECRTCOREAT	R	RCCGAC	Os08g0434300|MDH	-780	-775	agcaGCCGACtgct	1
START_END	DR	-	Os09g0426800|WSL2	-3000	-1	-	0
NF-CO	D	CCACA	Os09g0426800|WSL2	-2681	-2677	tggaCCACAgtgt	1
NF-CO	D	CCACA	Os09g0426800|WSL2	-1075	-1071	tccgCCACAccac	1
NF-CO	R	CCACA	Os09g0426800|WSL2	-2552	-2548	aaaaCCACAaaag	1
NF-CO	R	CCACA	Os09g0426800|WSL2	-2354	-2350	caatCCACAaaag	1
NF-CO	R	CCACA	Os09g0426800|WSL2	-1733	-1729	tgctCCACAtaca	1
NF-CO	R	CCACA	Os09g0426800|WSL2	-1290	-1286	tattCCACAaaaa	1
NF-CO	R	CCACA	Os09g0426800|WSL2	-331	-327	cgtaCCACAcaca	1
NF-CO	R	CCACA	Os09g0426800|WSL2	-287	-283	ggcaCCACAcacg	1
NF-CO	R	CCACA	Os09g0426800|WSL2	-224	-220	caggCCACAgcac	1
NF-Y	D	CCAAT	Os09g0426800|WSL2	-1705	-1701	taatCCAATcctt	1
NF-Y	D	CCAAT	Os09g0426800|WSL2	-1576	-1572	gtttCCAATttct	1
NF-Y	D	CCAAT	Os09g0426800|WSL2	-538	-534	tggcCCAATtaat	1
NF-Y	D	CCAAT	Os09g0426800|WSL2	-203	-199	ccggCCAATcgat	1
NF-Y	R	CCAAT	Os09g0426800|WSL2	-2837	-2833	attcCCAATtttc	1
NF-Y	R	CCAAT	Os09g0426800|WSL2	-1103	-1099	gtaaCCAATtctg	1
NF-YB	R	CCACATA	Os09g0426800|WSL2	-1735	-1729	tgctCCACATAcacc	1
NAP	D	TACGT	Os09g0426800|WSL2	-1662	-1658	caagTACGTttag	1
NAP	D	TACGT	Os09g0426800|WSL2	-1613	-1609	tttgTACGTgaaa	1
NAP	D	TACGT	Os09g0426800|WSL2	-501	-497	tccgTACGTgatc	1
NAP	D	TACGT	Os09g0426800|WSL2	-339	-335	cctgTACGTgtgt	1
NAP	D	TACGT	Os09g0426800|WSL2	-326	-322	gtggTACGTagcg	1
NAP	R	TACGT	Os09g0426800|WSL2	-2093	-2089	gtttTACGTgaaa	1
NAP	R	TACGT	Os09g0426800|WSL2	-1977	-1973	acggTACGTctcg	1
NAP	R	TACGT	Os09g0426800|WSL2	-1652	-1648	ttccTACGTtcta	1
NAP	R	TACGT	Os09g0426800|WSL2	-325	-321	ccgcTACGTacca	1
NAP	R	TACGT	Os09g0426800|WSL2	-36	-32	tataTACGTgaaa	1
NACR	R	CACGCA	Os09g0426800|WSL2	-367	-362	aaatCACGCAcgcg	1
ABRELATERD1	D	ACGTG	Os09g0426800|WSL2	-1612	-1608	ttgtACGTGaaat	1
ABRELATERD1	D	ACGTG	Os09g0426800|WSL2	-500	-496	ccgtACGTGatcg	1
ABRELATERD1	D	ACGTG	Os09g0426800|WSL2	-338	-334	ctgtACGTGtgtg	1
ABRELATERD1	R	ACGTG	Os09g0426800|WSL2	-2897	-2893	acgaACGTGtgac	1
ABRELATERD1	R	ACGTG	Os09g0426800|WSL2	-2094	-2090	ttttACGTGaaac	1
ABRELATERD1	R	ACGTG	Os09g0426800|WSL2	-1421	-1417	cgaaACGTGcgcg	1
ABRELATERD1	R	ACGTG	Os09g0426800|WSL2	-37	-33	atatACGTGaaac	1
ABRERATCAL	D	MACGYGB	Os09g0426800|WSL2	-1176	-1170	cctgCACGCGGcaga	1
ABRERATCAL	D	MACGYGB	Os09g0426800|WSL2	-470	-464	gcacCACGCGTccac	1
ABRERATCAL	D	MACGYGB	Os09g0426800|WSL2	-462	-456	cgtcCACGCGTctct	1
ABRERATCAL	R	MACGYGB	Os09g0426800|WSL2	-2898	-2892	cacgAACGTGTgacg	1
ABRERATCAL	R	MACGYGB	Os09g0426800|WSL2	-1422	-1416	acgaAACGTGCgcgt	1
ABRERATCAL	R	MACGYGB	Os09g0426800|WSL2	-1127	-1121	tagcCACGCGTaacc	1
ABRERATCAL	R	MACGYGB	Os09g0426800|WSL2	-372	-366	cacgCACGCGGctgg	1
MYB1AT	R	WAACCA	Os09g0426800|WSL2	-2550	-2545	aagaAAACCAcaaa	1
MYB1AT	R	WAACCA	Os09g0426800|WSL2	-1132	-1127	cgcgTAACCAacgc	1
MYB1AT	R	WAACCA	Os09g0426800|WSL2	-1101	-1096	ggcgTAACCAattc	1
MYBCORE	D	CNGTTR	Os09g0426800|WSL2	-2768	-2763	aaaaCAGTTGccaa	1
MYBCORE	D	CNGTTR	Os09g0426800|WSL2	-2255	-2250	tataCCGTTAattc	1
MYBCORE	R	CNGTTR	Os09g0426800|WSL2	-54	-49	tgcaCAGTTGcact	1
MYBCOREATCYCB1	D	AACGG	Os09g0426800|WSL2	-2591	-2587	cgagAACGGataa	1
MYBCOREATCYCB1	R	AACGG	Os09g0426800|WSL2	-2255	-2251	aattAACGGtata	1
MYBCOREATCYCB1	R	AACGG	Os09g0426800|WSL2	-1972	-1968	gctaAACGGtacg	1
MYBCOREATCYCB1	R	AACGG	Os09g0426800|WSL2	-308	-304	ttgaAACGGgatt	1
MYBPLANT	D	MACCWAMC	Os09g0426800|WSL2	-950	-943	ggacAACCAAACaagc	1
MYBPZM	R	CCWACC	Os09g0426800|WSL2	-265	-260	ttccCCAACCagac	1
MYBST1	D	GGATA	Os09g0426800|WSL2	-2588	-2584	gaacGGATAatgc	1
MYBST1	D	GGATA	Os09g0426800|WSL2	-2565	-2561	ttagGGATAtctt	1
MYBST1	D	GGATA	Os09g0426800|WSL2	-1212	-1208	tttaGGATAattt	1
MYBST1	D	GGATA	Os09g0426800|WSL2	-732	-728	cttcGGATAataa	1
MYBST1	D	GGATA	Os09g0426800|WSL2	-246	-242	tggcGGATAgccc	1
MYBST1	R	GGATA	Os09g0426800|WSL2	-1941	-1937	ttttGGATActcg	1
MYBST1	R	GGATA	Os09g0426800|WSL2	-1115	-1111	ggctGGATAgtag	1
MYBST1	R	GGATA	Os09g0426800|WSL2	-1042	-1038	tatcGGATAgtag	1
MYBST1	R	GGATA	Os09g0426800|WSL2	-610	-606	ttttGGATActat	1
DRECRTCOREAT	D	RCCGAC	Os09g0426800|WSL2	-2512	-2507	aaacACCGACcaaa	1
DRECRTCOREAT	D	RCCGAC	Os09g0426800|WSL2	-1821	-1816	gaacGCCGACgaag	1
DRECRTCOREAT	D	RCCGAC	Os09g0426800|WSL2	-1453	-1448	aagaGCCGACaatg	1
START_END	DR	-	Os03g0336000|Os03g0336000	-3000	-1	-	0
NF-CO	D	CCACA	Os03g0336000|Os03g0336000	-2254	-2250	gaagCCACAagtc	1
NF-CO	D	CCACA	Os03g0336000|Os03g0336000	-1709	-1705	tttgCCACAatcc	1
NF-CO	D	CCACA	Os03g0336000|Os03g0336000	-611	-607	gttaCCACAtgtg	1
NF-CO	R	CCACA	Os03g0336000|Os03g0336000	-2588	-2584	tataCCACAgctg	1
NF-CO	R	CCACA	Os03g0336000|Os03g0336000	-2464	-2460	tactCCACAagga	1
NF-CO	R	CCACA	Os03g0336000|Os03g0336000	-1697	-1693	ttgtCCACAtgag	1
NF-CO	R	CCACA	Os03g0336000|Os03g0336000	-1119	-1115	ttccCCACAaaca	1
NF-CO	R	CCACA	Os03g0336000|Os03g0336000	-778	-774	cgctCCACAacgg	1
NF-CO	R	CCACA	Os03g0336000|Os03g0336000	-670	-666	gatcCCACAactc	1
NF-Y	D	CCAAT	Os03g0336000|Os03g0336000	-2762	-2758	gaacCCAATttta	1
NF-Y	D	CCAAT	Os03g0336000|Os03g0336000	-2080	-2076	agtaCCAATggga	1
NF-Y	R	CCAAT	Os03g0336000|Os03g0336000	-2488	-2484	tatcCCAATtacc	1
NF-Y	R	CCAAT	Os03g0336000|Os03g0336000	-2391	-2387	attaCCAATaaga	1
NF-Y	R	CCAAT	Os03g0336000|Os03g0336000	-1567	-1563	gttgCCAATcttc	1
NAP	D	TACGT	Os03g0336000|Os03g0336000	-1150	-1146	aaaaTACGTtata	1
NAP	R	TACGT	Os03g0336000|Os03g0336000	-1578	-1574	tctgTACGTgctg	1
NACR	R	CACGCA	Os03g0336000|Os03g0336000	-765	-760	gtgtCACGCActta	1
ABRELATERD1	D	ACGTG	Os03g0336000|Os03g0336000	-163	-159	cctcACGTGtaca	1
ABRELATERD1	R	ACGTG	Os03g0336000|Os03g0336000	-1579	-1575	ctgtACGTGctga	1
ABRELATERD1	R	ACGTG	Os03g0336000|Os03g0336000	-554	-550	cggaACGTGtatt	1
ABRELATERD1	R	ACGTG	Os03g0336000|Os03g0336000	-164	-160	gtacACGTGagga	1
ABRERATCAL	D	MACGYGB	Os03g0336000|Os03g0336000	-920	-914	ggacAACGCGGtccc	1
ABRERATCAL	D	MACGYGB	Os03g0336000|Os03g0336000	-164	-158	tcctCACGTGTacac	1
ABRERATCAL	R	MACGYGB	Os03g0336000|Os03g0336000	-555	-549	acggAACGTGTattt	1
MYB1AT	D	WAACCA	Os03g0336000|Os03g0336000	-427	-422	ggagTAACCAccgt	1
MYB1AT	R	WAACCA	Os03g0336000|Os03g0336000	-1990	-1985	cgatAAACCAgaca	1
MYB1AT	R	WAACCA	Os03g0336000|Os03g0336000	-1880	-1875	aaacTAACCAagaa	1
MYB1AT	R	WAACCA	Os03g0336000|Os03g0336000	-1368	-1363	acacAAACCAaaca	1
MYB2AT	D	TAACTG	Os03g0336000|Os03g0336000	-2457	-2452	ggagTAACTGggga	1
MYB2AT	D	TAACTG	Os03g0336000|Os03g0336000	-1743	-1738	taaaTAACTGaaga	1
MYB2AT	D	TAACTG	Os03g0336000|Os03g0336000	-1687	-1682	caagTAACTGaaga	1
MYBCORE	D	CNGTTR	Os03g0336000|Os03g0336000	-2561	-2556	gcatCTGTTAggga	1
MYBCORE	D	CNGTTR	Os03g0336000|Os03g0336000	-2099	-2094	taagCTGTTGgaac	1
MYBCORE	D	CNGTTR	Os03g0336000|Os03g0336000	-984	-979	ttttCCGTTGtgtg	1
MYBCORE	D	CNGTTR	Os03g0336000|Os03g0336000	-782	-777	cgggCCGTTGtgga	1
MYBCORE	D	CNGTTR	Os03g0336000|Os03g0336000	-282	-277	tttaCGGTTGaggg	1
MYBCORE	D	CNGTTR	Os03g0336000|Os03g0336000	-57	-52	tgtcCCGTTGggcc	1
MYBCORE	R	CNGTTR	Os03g0336000|Os03g0336000	-2457	-2452	tcccCAGTTActcc	1
MYBCORE	R	CNGTTR	Os03g0336000|Os03g0336000	-1743	-1738	tcttCAGTTAttta	1
MYBCORE	R	CNGTTR	Os03g0336000|Os03g0336000	-1687	-1682	tcttCAGTTActtg	1
MYBCORE	R	CNGTTR	Os03g0336000|Os03g0336000	-294	-289	aatcCGGTTAtaat	1
MYBCOREATCYCB1	D	AACGG	Os03g0336000|Os03g0336000	-853	-849	agtaAACGGagga	1
MYBCOREATCYCB1	R	AACGG	Os03g0336000|Os03g0336000	-984	-980	acacAACGGaaaa	1
MYBCOREATCYCB1	R	AACGG	Os03g0336000|Os03g0336000	-782	-778	ccacAACGGcccg	1
MYBCOREATCYCB1	R	AACGG	Os03g0336000|Os03g0336000	-57	-53	gcccAACGGgaca	1
MYBPLANT	R	MACCWAMC	Os03g0336000|Os03g0336000	-1420	-1413	ctccAACCAAACactg	1
MYBPLANT	R	MACCWAMC	Os03g0336000|Os03g0336000	-1371	-1364	cacaAACCAAACaaaa	1
MYBPZM	D	CCWACC	Os03g0336000|Os03g0336000	-662	-657	ggatCCAACCccct	1
MYBPZM	R	CCWACC	Os03g0336000|Os03g0336000	-1416	-1411	tcctCCAACCaaac	1
MYBPZM	R	CCWACC	Os03g0336000|Os03g0336000	-1101	-1096	gatcCCAACCctaa	1
MYBST1	D	GGATA	Os03g0336000|Os03g0336000	-2484	-2480	attgGGATAtttg	1
MYBST1	D	GGATA	Os03g0336000|Os03g0336000	-1432	-1428	taatGGATAaatc	1
MYBST1	R	GGATA	Os03g0336000|Os03g0336000	-2809	-2805	acttGGATAtggc	1
MYBST1	R	GGATA	Os03g0336000|Os03g0336000	-2788	-2784	acctGGATAcctc	1
MYBST1	R	GGATA	Os03g0336000|Os03g0336000	-1301	-1297	tacgGGATAgagg	1
START_END	DR	-	Os04g0390100|Os04g0390100	-3000	-1	-	0
NF-CO	D	CCACA	Os04g0390100|Os04g0390100	-2312	-2308	tataCCACAgatc	1
NF-CO	D	CCACA	Os04g0390100|Os04g0390100	-1860	-1856	tacaCCACAaaac	1
NF-CO	D	CCACA	Os04g0390100|Os04g0390100	-1285	-1281	agcaCCACAttgt	1
NF-CO	D	CCACA	Os04g0390100|Os04g0390100	-651	-647	gaagCCACAcgag	1
NF-CO	D	CCACA	Os04g0390100|Os04g0390100	-422	-418	atctCCACAataa	1
NF-CO	R	CCACA	Os04g0390100|Os04g0390100	-2052	-2048	acttCCACAaaat	1
NF-CO	R	CCACA	Os04g0390100|Os04g0390100	-1780	-1776	aaagCCACAaaca	1
NF-CO	R	CCACA	Os04g0390100|Os04g0390100	-1138	-1134	gttcCCACAcaaa	1
NF-Y	D	CCAAT	Os04g0390100|Os04g0390100	-2634	-2630	gtgcCCAATatat	1
NF-Y	D	CCAAT	Os04g0390100|Os04g0390100	-2425	-2421	ccttCCAATctgc	1
NF-Y	R	CCAAT	Os04g0390100|Os04g0390100	-2986	-2982	cagcCCAATtttt	1
NF-Y	R	CCAAT	Os04g0390100|Os04g0390100	-926	-922	aaggCCAATttaa	1
NF-Y	R	CCAAT	Os04g0390100|Os04g0390100	-806	-802	ttttCCAATcaag	1
NF-Y	R	CCAAT	Os04g0390100|Os04g0390100	-552	-548	ttttCCAATctgc	1
NAP	D	TACGT	Os04g0390100|Os04g0390100	-2838	-2834	acaaTACGTaaca	1
NAP	D	TACGT	Os04g0390100|Os04g0390100	-1129	-1125	gaacTACGTgggt	1
NAP	R	TACGT	Os04g0390100|Os04g0390100	-2837	-2833	ttgtTACGTattg	1
NAP	R	TACGT	Os04g0390100|Os04g0390100	-1507	-1503	acaaTACGTcatg	1
NAP	R	TACGT	Os04g0390100|Os04g0390100	-777	-773	tgggTACGTgcat	1
NACR	D	CACGCA	Os04g0390100|Os04g0390100	-1724	-1719	aattCACGCAtgta	1
ABRELATERD1	D	ACGTG	Os04g0390100|Os04g0390100	-2508	-2504	ctcaACGTGgatc	1
ABRELATERD1	D	ACGTG	Os04g0390100|Os04g0390100	-1707	-1703	cctaACGTGctat	1
ABRELATERD1	D	ACGTG	Os04g0390100|Os04g0390100	-1128	-1124	aactACGTGggtc	1
ABRELATERD1	R	ACGTG	Os04g0390100|Os04g0390100	-778	-774	gggtACGTGcatc	1
ABRERATCAL	D	MACGYGB	Os04g0390100|Os04g0390100	-2509	-2503	gctcAACGTGGatcc	1
ABRERATCAL	D	MACGYGB	Os04g0390100|Os04g0390100	-1708	-1702	acctAACGTGCtatt	1
MYB1AT	D	WAACCA	Os04g0390100|Os04g0390100	-2880	-2875	tcttAAACCAtgtt	1
MYB1AT	D	WAACCA	Os04g0390100|Os04g0390100	-2065	-2060	tacaAAACCAtgga	1
MYB1AT	D	WAACCA	Os04g0390100|Os04g0390100	-623	-618	tttgAAACCAtgga	1
MYB1AT	D	WAACCA	Os04g0390100|Os04g0390100	-443	-438	agtaAAACCAaaaa	1
MYB1AT	R	WAACCA	Os04g0390100|Os04g0390100	-1011	-1006	agttTAACCAccat	1
MYB2AT	D	TAACTG	Os04g0390100|Os04g0390100	-983	-978	ggtgTAACTGcatt	1
MYB2AT	D	TAACTG	Os04g0390100|Os04g0390100	-731	-726	gtgaTAACTGaaaa	1
MYBCORE	D	CNGTTR	Os04g0390100|Os04g0390100	-2449	-2444	tccaCGGTTAtctt	1
MYBCORE	D	CNGTTR	Os04g0390100|Os04g0390100	-752	-747	ctagCTGTTGtgca	1
MYBCORE	R	CNGTTR	Os04g0390100|Os04g0390100	-2417	-2412	tgtaCCGTTGcaga	1
MYBCORE	R	CNGTTR	Os04g0390100|Os04g0390100	-1105	-1100	gagaCTGTTGgttg	1
MYBCORE	R	CNGTTR	Os04g0390100|Os04g0390100	-983	-978	aatgCAGTTAcacc	1
MYBCORE	R	CNGTTR	Os04g0390100|Os04g0390100	-793	-788	aaccCGGTTGtgcg	1
MYBCORE	R	CNGTTR	Os04g0390100|Os04g0390100	-731	-726	ttttCAGTTAtcac	1
MYBCOREATCYCB1	D	AACGG	Os04g0390100|Os04g0390100	-2416	-2412	ctgcAACGGtaca	1
MYBCOREATCYCB1	R	AACGG	Os04g0390100|Os04g0390100	-2740	-2736	attaAACGGaaca	1
MYBPLANT	R	MACCWAMC	Os04g0390100|Os04g0390100	-1978	-1971	atgtCACCAAACagat	1
MYBPZM	D	CCWACC	Os04g0390100|Os04g0390100	-1555	-1550	tctaCCTACCgtgg	1
MYBPZM	D	CCWACC	Os04g0390100|Os04g0390100	-514	-509	tagtCCTACCactc	1
MYBPZM	R	CCWACC	Os04g0390100|Os04g0390100	-1523	-1518	actgCCTACCgcta	1
MYBPZM	R	CCWACC	Os04g0390100|Os04g0390100	-787	-782	gcatCCAACCcggt	1
START_END	DR	-	Os05g0468900|Os05g0468900	-3000	-1	-	0
NF-CO	D	CCACA	Os05g0468900|Os05g0468900	-2702	-2698	ccgcCCACAgctt	1
NF-CO	D	CCACA	Os05g0468900|Os05g0468900	-2145	-2141	cgggCCACAgcct	1
NF-CO	D	CCACA	Os05g0468900|Os05g0468900	-1235	-1231	attcCCACAagcc	1
NF-CO	D	CCACA	Os05g0468900|Os05g0468900	-167	-163	aaacCCACAcgac	1
NF-CO	D	CCACA	Os05g0468900|Os05g0468900	-104	-100	ctcgCCACAccac	1
NF-CO	D	CCACA	Os05g0468900|Os05g0468900	-99	-95	cacaCCACAcgcc	1
NF-CO	R	CCACA	Os05g0468900|Os05g0468900	-1286	-1282	tgagCCACAaaag	1
NF-Y	D	CCAAT	Os05g0468900|Os05g0468900	-2955	-2951	ccatCCAATcgca	1
NF-Y	D	CCAAT	Os05g0468900|Os05g0468900	-2598	-2594	cagcCCAATcgta	1
NF-Y	D	CCAAT	Os05g0468900|Os05g0468900	-1392	-1388	cactCCAATcata	1
NF-Y	R	CCAAT	Os05g0468900|Os05g0468900	-2513	-2509	atcaCCAATtcct	1
NF-Y	R	CCAAT	Os05g0468900|Os05g0468900	-2260	-2256	attcCCAATctaa	1
NF-Y	R	CCAAT	Os05g0468900|Os05g0468900	-1923	-1919	aataCCAATagta	1
NF-Y	R	CCAAT	Os05g0468900|Os05g0468900	-380	-376	tacaCCAATggca	1
NAP	R	TACGT	Os05g0468900|Os05g0468900	-2544	-2540	ggctTACGTctag	1
NAP	R	TACGT	Os05g0468900|Os05g0468900	-2023	-2019	acgtTACGTgaaa	1
NAP	R	TACGT	Os05g0468900|Os05g0468900	-6	-2	gTACGTcgcg	1
NACR	R	CACGCA	Os05g0468900|Os05g0468900	-2916	-2911	ttttCACGCAgtgc	1
NACR	R	CACGCA	Os05g0468900|Os05g0468900	-1377	-1372	tttcCACGCAggtt	1
ABRELATERD1	D	ACGTG	Os05g0468900|Os05g0468900	-1221	-1217	gcaaACGTGccag	1
ABRELATERD1	R	ACGTG	Os05g0468900|Os05g0468900	-2024	-2020	cgttACGTGaaat	1
ABRERATCAL	D	MACGYGB	Os05g0468900|Os05g0468900	-1222	-1216	agcaAACGTGCcagc	1
ABRERATCAL	D	MACGYGB	Os05g0468900|Os05g0468900	-77	-71	cgggCACGCGCgcca	1
MYB1AT	D	WAACCA	Os05g0468900|Os05g0468900	-1277	-1272	ctcaAAACCAacgc	1
MYB1AT	D	WAACCA	Os05g0468900|Os05g0468900	-687	-682	ttggTAACCAgggg	1
MYB2AT	R	TAACTG	Os05g0468900|Os05g0468900	-1934	-1929	gtagTAACTGttca	1
MYBCORE	D	CNGTTR	Os05g0468900|Os05g0468900	-2727	-2722	tgtcCGGTTGgatc	1
MYBCORE	D	CNGTTR	Os05g0468900|Os05g0468900	-2089	-2084	gctaCCGTTGctgc	1
MYBCORE	D	CNGTTR	Os05g0468900|Os05g0468900	-1934	-1929	tgaaCAGTTActac	1
MYBCORE	D	CNGTTR	Os05g0468900|Os05g0468900	-1477	-1472	cttcCGGTTGtaaa	1
MYBCORE	D	CNGTTR	Os05g0468900|Os05g0468900	-1425	-1420	gcagCTGTTAggcg	1
MYBCORE	R	CNGTTR	Os05g0468900|Os05g0468900	-2561	-2556	agtgCAGTTGttgt	1
MYBCORE	R	CNGTTR	Os05g0468900|Os05g0468900	-1198	-1193	ctagCTGTTGaccg	1
MYBCOREATCYCB1	D	AACGG	Os05g0468900|Os05g0468900	-1036	-1032	ggaaAACGGagcg	1
MYBCOREATCYCB1	R	AACGG	Os05g0468900|Os05g0468900	-2934	-2930	agaaAACGGagta	1
MYBCOREATCYCB1	R	AACGG	Os05g0468900|Os05g0468900	-2089	-2085	cagcAACGGtagc	1
MYBCOREATCYCB1	R	AACGG	Os05g0468900|Os05g0468900	-1077	-1073	ctcgAACGGatgc	1
MYBCOREATCYCB1	R	AACGG	Os05g0468900|Os05g0468900	-655	-651	tgaaAACGGagga	1
MYBPZM	D	CCWACC	Os05g0468900|Os05g0468900	-212	-207	tttaCCAACCttaa	1
MYBPZM	R	CCWACC	Os05g0468900|Os05g0468900	-2726	-2721	cgatCCAACCggac	1
MYBST1	D	GGATA	Os05g0468900|Os05g0468900	-2458	-2454	tccaGGATAtttt	1
MYBST1	D	GGATA	Os05g0468900|Os05g0468900	-963	-959	ttttGGATAaggg	1
DRECRTCOREAT	R	RCCGAC	Os05g0468900|Os05g0468900	-1142	-1137	ctcgGCCGACtggc	1
START_END	DR	-	Os06g0486800|OsFDH	-3000	-1	-	0
NF-CO	D	CCACA	Os06g0486800|OsFDH	-2810	-2806	ccatCCACAttgc	1
NF-CO	D	CCACA	Os06g0486800|OsFDH	-122	-118	gagcCCACAcagc	1
NF-CO	R	CCACA	Os06g0486800|OsFDH	-2954	-2950	aaacCCACAccta	1
NF-CO	R	CCACA	Os06g0486800|OsFDH	-2120	-2116	tacaCCACAccac	1
NF-CO	R	CCACA	Os06g0486800|OsFDH	-1643	-1639	gcctCCACAgaac	1
NF-Y	D	CCAAT	Os06g0486800|OsFDH	-2934	-2930	gttaCCAATttgg	1
NF-Y	D	CCAAT	Os06g0486800|OsFDH	-1617	-1613	gcgcCCAATtttt	1
NF-Y	D	CCAAT	Os06g0486800|OsFDH	-916	-912	acctCCAATgtat	1
NF-Y	D	CCAAT	Os06g0486800|OsFDH	-821	-817	actaCCAATtttc	1
NF-Y	R	CCAAT	Os06g0486800|OsFDH	-2633	-2629	agatCCAATggga	1
NF-Y	R	CCAAT	Os06g0486800|OsFDH	-1742	-1738	tgttCCAATatgg	1
NF-Y	R	CCAAT	Os06g0486800|OsFDH	-1003	-999	tttaCCAATttaa	1
NF-Y	R	CCAAT	Os06g0486800|OsFDH	-523	-519	tcaaCCAATcttt	1
NF-Y	R	CCAAT	Os06g0486800|OsFDH	-513	-509	cgtaCCAATttca	1
NAP	D	TACGT	Os06g0486800|OsFDH	-837	-833	aataTACGTttgt	1
NAP	D	TACGT	Os06g0486800|OsFDH	-415	-411	ggccTACGTgcat	1
NAP	R	TACGT	Os06g0486800|OsFDH	-1970	-1966	cctcTACGTgatg	1
NAP	R	TACGT	Os06g0486800|OsFDH	-209	-205	cacaTACGTggcc	1
NACR	D	CACGCA	Os06g0486800|OsFDH	-398	-393	gactCACGCAgcct	1
NACR	R	CACGCA	Os06g0486800|OsFDH	-344	-339	gaagCACGCAcgct	1
ABRELATERD1	D	ACGTG	Os06g0486800|OsFDH	-2383	-2379	tccgACGTGgttg	1
ABRELATERD1	D	ACGTG	Os06g0486800|OsFDH	-1301	-1297	aaccACGTGtcca	1
ABRELATERD1	D	ACGTG	Os06g0486800|OsFDH	-414	-410	gcctACGTGcatg	1
ABRELATERD1	R	ACGTG	Os06g0486800|OsFDH	-2522	-2518	actaACGTGgatc	1
ABRELATERD1	R	ACGTG	Os06g0486800|OsFDH	-1971	-1967	ctctACGTGatga	1
ABRELATERD1	R	ACGTG	Os06g0486800|OsFDH	-1302	-1298	ggacACGTGgttt	1
ABRELATERD1	R	ACGTG	Os06g0486800|OsFDH	-210	-206	acatACGTGgccc	1
ABRERATCAL	D	MACGYGB	Os06g0486800|OsFDH	-1302	-1296	aaacCACGTGTccac	1
ABRERATCAL	D	MACGYGB	Os06g0486800|OsFDH	-68	-62	cgtcCACGCGGccca	1
ABRERATCAL	R	MACGYGB	Os06g0486800|OsFDH	-2523	-2517	cactAACGTGGatca	1
ABRERATCAL	R	MACGYGB	Os06g0486800|OsFDH	-1303	-1297	tggaCACGTGGttta	1
ABREATCONSENSUS	R	YACGTGGC	Os06g0486800|OsFDH	-212	-205	cacaTACGTGGCccct	1
MYB1AT	D	WAACCA	Os06g0486800|OsFDH	-2744	-2739	tcacAAACCAaaag	1
MYB1AT	D	WAACCA	Os06g0486800|OsFDH	-1306	-1301	caatAAACCAcgtg	1
MYB1AT	D	WAACCA	Os06g0486800|OsFDH	-296	-291	attaAAACCAgatt	1
MYB2AT	R	TAACTG	Os06g0486800|OsFDH	-2693	-2688	catgTAACTGtgaa	1
MYBCORE	D	CNGTTR	Os06g0486800|OsFDH	-2940	-2935	ccaaCTGTTAccaa	1
MYBCORE	D	CNGTTR	Os06g0486800|OsFDH	-2693	-2688	ttcaCAGTTAcatg	1
MYBCORE	R	CNGTTR	Os06g0486800|OsFDH	-2943	-2938	gtaaCAGTTGggaa	1
MYBCORE	R	CNGTTR	Os06g0486800|OsFDH	-1496	-1491	gaaaCCGTTGtttt	1
MYBCOREATCYCB1	D	AACGG	Os06g0486800|OsFDH	-1495	-1491	aaacAACGGtttc	1
MYBCOREATCYCB1	R	AACGG	Os06g0486800|OsFDH	-1084	-1080	cagaAACGGtcga	1
MYBPLANT	D	MACCWAMC	Os06g0486800|OsFDH	-82	-75	cgccCACCTACCcgcg	1
MYBPZM	D	CCWACC	Os06g0486800|OsFDH	-2500	-2495	agccCCAACCtcaa	1
MYBPZM	D	CCWACC	Os06g0486800|OsFDH	-80	-75	cccaCCTACCcgcg	1
MYBPZM	R	CCWACC	Os06g0486800|OsFDH	-2974	-2969	gttcCCAACCagca	1
MYBPZM	R	CCWACC	Os06g0486800|OsFDH	-2379	-2374	ctccCCAACCacgt	1
MYBPZM	R	CCWACC	Os06g0486800|OsFDH	-2307	-2302	tccgCCAACCctcc	1
MYBST1	D	GGATA	Os06g0486800|OsFDH	-2137	-2133	aagaGGATAaaat	1
MYBST1	R	GGATA	Os06g0486800|OsFDH	-680	-676	tggcGGATAtaaa	1
MYBST1	R	GGATA	Os06g0486800|OsFDH	-232	-228	gttaGGATAagac	1
MYBST1	R	GGATA	Os06g0486800|OsFDH	-165	-161	attaGGATAttta	1
MYBST1	R	GGATA	Os06g0486800|OsFDH	-27	-23	atatGGATAgata	1
MYBST1	R	GGATA	Os06g0486800|OsFDH	-13	-9	gatgGGATAgatt	1
DRECRTCOREAT	D	RCCGAC	Os06g0486800|OsFDH	-2844	-2839	cagaACCGACacct	1
START_END	DR	-	Os09g0438000|rbohG	-3000	-1	-	0
NF-CO	D	CCACA	Os09g0438000|rbohG	-1342	-1338	taatCCACAgggt	1
NF-CO	D	CCACA	Os09g0438000|rbohG	-1117	-1113	tgcgCCACAtcta	1
NF-CO	D	CCACA	Os09g0438000|rbohG	-983	-979	tggcCCACAttag	1
NF-CO	D	CCACA	Os09g0438000|rbohG	-249	-245	tcgtCCACAgcca	1
NF-CO	R	CCACA	Os09g0438000|rbohG	-2291	-2287	ttagCCACAaacc	1
NF-CO	R	CCACA	Os09g0438000|rbohG	-1948	-1944	cgcaCCACActac	1
NF-CO	R	CCACA	Os09g0438000|rbohG	-1851	-1847	acttCCACAcacc	1
NF-CO	R	CCACA	Os09g0438000|rbohG	-1304	-1300	agatCCACAtcga	1
NF-Y	D	CCAAT	Os09g0438000|rbohG	-1564	-1560	cgttCCAATttca	1
NF-Y	D	CCAAT	Os09g0438000|rbohG	-818	-814	gtctCCAATcaac	1
NF-Y	D	CCAAT	Os09g0438000|rbohG	-790	-786	ggtaCCAATaaca	1
NF-Y	R	CCAAT	Os09g0438000|rbohG	-2418	-2414	gaatCCAATatgg	1
NF-Y	R	CCAAT	Os09g0438000|rbohG	-2303	-2299	caaaCCAATcctt	1
NF-Y	R	CCAAT	Os09g0438000|rbohG	-2282	-2278	aaggCCAATttag	1
NAP	D	TACGT	Os09g0438000|rbohG	-1813	-1809	ggagTACGTgttg	1
NAP	D	TACGT	Os09g0438000|rbohG	-1279	-1275	aggaTACGTagcc	1
NAP	D	TACGT	Os09g0438000|rbohG	-58	-54	attaTACGTattt	1
NAP	R	TACGT	Os09g0438000|rbohG	-1703	-1699	agccTACGTgtgt	1
NAP	R	TACGT	Os09g0438000|rbohG	-1278	-1274	aggcTACGTatcc	1
NAP	R	TACGT	Os09g0438000|rbohG	-57	-53	taaaTACGTataa	1
NACR	D	CACGCA	Os09g0438000|rbohG	-711	-706	acaaCACGCAtact	1
NACR	D	CACGCA	Os09g0438000|rbohG	-290	-285	accgCACGCActcg	1
NACR	R	CACGCA	Os09g0438000|rbohG	-2379	-2374	aacgCACGCAcata	1
ABRELATERD1	D	ACGTG	Os09g0438000|rbohG	-2882	-2878	atcaACGTGcaaa	1
ABRELATERD1	D	ACGTG	Os09g0438000|rbohG	-1812	-1808	gagtACGTGttgt	1
ABRELATERD1	R	ACGTG	Os09g0438000|rbohG	-1704	-1700	gcctACGTGtgtc	1
ABRERATCAL	D	MACGYGB	Os09g0438000|rbohG	-2883	-2877	catcAACGTGCaaag	1
ABRERATCAL	D	MACGYGB	Os09g0438000|rbohG	-321	-315	accgAACGCGTctcg	1
MYB1AT	D	WAACCA	Os09g0438000|rbohG	-2984	-2979	ggtaAAACCAggta	1
MYB1AT	D	WAACCA	Os09g0438000|rbohG	-2129	-2124	cttcAAACCAaata	1
MYB1AT	D	WAACCA	Os09g0438000|rbohG	-2067	-2062	cctcAAACCAaacc	1
MYB1AT	D	WAACCA	Os09g0438000|rbohG	-1320	-1315	taatTAACCAgaaa	1
MYB1AT	R	WAACCA	Os09g0438000|rbohG	-2301	-2296	aaccAAACCAatcc	1
MYB2AT	D	TAACTG	Os09g0438000|rbohG	-1371	-1366	ttagTAACTGttca	1
MYBCORE	D	CNGTTR	Os09g0438000|rbohG	-2961	-2956	aacaCAGTTGcaat	1
MYBCORE	R	CNGTTR	Os09g0438000|rbohG	-2788	-2783	cagaCAGTTGaaga	1
MYBCORE	R	CNGTTR	Os09g0438000|rbohG	-2389	-2384	cataCCGTTAtgtg	1
MYBCORE	R	CNGTTR	Os09g0438000|rbohG	-1371	-1366	tgaaCAGTTActaa	1
MYBCORE	R	CNGTTR	Os09g0438000|rbohG	-1354	-1349	tattCGGTTAtgac	1
MYBCORE	R	CNGTTR	Os09g0438000|rbohG	-1043	-1038	ctctCAGTTGctat	1
MYBCORE	R	CNGTTR	Os09g0438000|rbohG	-869	-864	acttCGGTTAggcg	1
MYBCORE	R	CNGTTR	Os09g0438000|rbohG	-224	-219	cgcgCGGTTGggtt	1
MYBCOREATCYCB1	D	AACGG	Os09g0438000|rbohG	-2388	-2384	acatAACGGtatg	1
MYBCOREATCYCB1	R	AACGG	Os09g0438000|rbohG	-607	-603	tataAACGGatta	1
MYBPLANT	D	MACCWAMC	Os09g0438000|rbohG	-2066	-2059	ctcaAACCAAACcagc	1
MYBPLANT	D	MACCWAMC	Os09g0438000|rbohG	-1830	-1823	ctctCACCTACCtcgc	1
MYBPLANT	D	MACCWAMC	Os09g0438000|rbohG	-1556	-1549	tttcAACCAAACtttt	1
MYBPLANT	D	MACCWAMC	Os09g0438000|rbohG	-184	-177	cccgCACCAACCccgc	1
MYBPLANT	R	MACCWAMC	Os09g0438000|rbohG	-2299	-2292	cacaAACCAAACcaat	1
MYBPZM	D	CCWACC	Os09g0438000|rbohG	-1828	-1823	ctcaCCTACCtcgc	1
MYBPZM	D	CCWACC	Os09g0438000|rbohG	-1718	-1713	atctCCAACCatgt	1
MYBPZM	D	CCWACC	Os09g0438000|rbohG	-1520	-1515	acacCCTACCttca	1
MYBPZM	D	CCWACC	Os09g0438000|rbohG	-415	-410	cggcCCAACCccaa	1
MYBPZM	D	CCWACC	Os09g0438000|rbohG	-235	-230	aaacCCAACCcaac	1
MYBPZM	D	CCWACC	Os09g0438000|rbohG	-225	-220	caacCCAACCgcgc	1
MYBPZM	D	CCWACC	Os09g0438000|rbohG	-182	-177	cgcaCCAACCccgc	1
MYBST1	D	GGATA	Os09g0438000|rbohG	-1282	-1278	gaaaGGATAcgta	1
MYBST1	D	GGATA	Os09g0438000|rbohG	-72	-68	cacgGGATAgtcg	1
MYBST1	R	GGATA	Os09g0438000|rbohG	-2546	-2542	gggaGGATAtata	1
MYBST1	R	GGATA	Os09g0438000|rbohG	-34	-30	actaGGATAtata	1
DRECRTCOREAT	R	RCCGAC	Os09g0438000|rbohG	-1867	-1862	attgACCGACgacg	1
START_END	DR	-	Os02g0465900|OsARP	-3000	-1	-	0
NF-CO	D	CCACA	Os02g0465900|OsARP	-2977	-2973	gggcCCACAgttt	1
NF-CO	D	CCACA	Os02g0465900|OsARP	-2879	-2875	acctCCACAacca	1
NF-CO	D	CCACA	Os02g0465900|OsARP	-493	-489	tcaaCCACAcccg	1
NF-CO	R	CCACA	Os02g0465900|OsARP	-2896	-2892	tcacCCACAaccg	1
NF-CO	R	CCACA	Os02g0465900|OsARP	-2772	-2768	aattCCACAtact	1
NF-CO	R	CCACA	Os02g0465900|OsARP	-1443	-1439	cataCCACAtata	1
NF-Y	D	CCAAT	Os02g0465900|OsARP	-2907	-2903	ctccCCAATgacg	1
NF-Y	D	CCAAT	Os02g0465900|OsARP	-1923	-1919	atgtCCAATcaga	1
NF-Y	D	CCAAT	Os02g0465900|OsARP	-1285	-1281	ctagCCAATaaat	1
NF-Y	D	CCAAT	Os02g0465900|OsARP	-448	-444	ctccCCAATcccc	1
NF-Y	R	CCAAT	Os02g0465900|OsARP	-1645	-1641	aacaCCAATgcag	1
NF-Y	R	CCAAT	Os02g0465900|OsARP	-1198	-1194	tgaaCCAATcgac	1
NF-Y	R	CCAAT	Os02g0465900|OsARP	-1155	-1151	caatCCAATcagc	1
NF-Y	R	CCAAT	Os02g0465900|OsARP	-1065	-1061	ctagCCAATgtcc	1
NF-YB	R	CCACATA	Os02g0465900|OsARP	-2774	-2768	aattCCACATActaa	1
NF-YB	R	CCACATA	Os02g0465900|OsARP	-1445	-1439	cataCCACATAtatt	1
NAP	D	TACGT	Os02g0465900|OsARP	-1837	-1833	taaaTACGTacac	1
NAP	R	TACGT	Os02g0465900|OsARP	-1836	-1832	ggtgTACGTattt	1
NAP	R	TACGT	Os02g0465900|OsARP	-1251	-1247	aactTACGTtggc	1
NACR	D	CACGCA	Os02g0465900|OsARP	-724	-719	ttcaCACGCAtgtt	1
ABRELATERD1	D	ACGTG	Os02g0465900|OsARP	-2930	-2926	ttccACGTGgagg	1
ABRELATERD1	D	ACGTG	Os02g0465900|OsARP	-291	-287	cgtcACGTGccgg	1
ABRELATERD1	D	ACGTG	Os02g0465900|OsARP	-183	-179	cctcACGTGcctc	1
ABRELATERD1	D	ACGTG	Os02g0465900|OsARP	-74	-70	gacgACGTGcccg	1
ABRELATERD1	R	ACGTG	Os02g0465900|OsARP	-2931	-2927	ctccACGTGgaag	1
ABRELATERD1	R	ACGTG	Os02g0465900|OsARP	-292	-288	cggcACGTGacgg	1
ABRELATERD1	R	ACGTG	Os02g0465900|OsARP	-184	-180	aggcACGTGaggg	1
ABRERATCAL	D	MACGYGB	Os02g0465900|OsARP	-2931	-2925	cttcCACGTGGaggg	1
ABRERATCAL	D	MACGYGB	Os02g0465900|OsARP	-292	-286	ccgtCACGTGCcggc	1
ABRERATCAL	D	MACGYGB	Os02g0465900|OsARP	-184	-178	ccctCACGTGCctcg	1
ABRERATCAL	D	MACGYGB	Os02g0465900|OsARP	-111	-105	cgatCACGCGGcgac	1
ABRERATCAL	R	MACGYGB	Os02g0465900|OsARP	-2932	-2926	cctcCACGTGGaagc	1
MYB1AT	D	WAACCA	Os02g0465900|OsARP	-2964	-2959	ggccTAACCAccat	1
MYB1AT	D	WAACCA	Os02g0465900|OsARP	-1241	-1236	gtttTAACCActga	1
MYB1AT	D	WAACCA	Os02g0465900|OsARP	-646	-641	atatTAACCAaaat	1
MYB1AT	D	WAACCA	Os02g0465900|OsARP	-270	-265	accaAAACCAgctc	1
MYB1AT	R	WAACCA	Os02g0465900|OsARP	-2701	-2696	gacaAAACCAactt	1
MYB2AT	D	TAACTG	Os02g0465900|OsARP	-2510	-2505	ttatTAACTGctct	1
MYB2AT	D	TAACTG	Os02g0465900|OsARP	-1578	-1573	tgccTAACTGatat	1
MYBCORE	D	CNGTTR	Os02g0465900|OsARP	-2900	-2895	atgaCGGTTGtggg	1
MYBCORE	D	CNGTTR	Os02g0465900|OsARP	-2416	-2411	ttagCGGTTAccgt	1
MYBCORE	D	CNGTTR	Os02g0465900|OsARP	-2069	-2064	gattCGGTTAagga	1
MYBCORE	D	CNGTTR	Os02g0465900|OsARP	-1594	-1589	ggttCGGTTGatat	1
MYBCORE	D	CNGTTR	Os02g0465900|OsARP	-1508	-1503	gtatCGGTTAggtc	1
MYBCORE	D	CNGTTR	Os02g0465900|OsARP	-1374	-1369	tcatCGGTTAggtt	1
MYBCORE	R	CNGTTR	Os02g0465900|OsARP	-2510	-2505	agagCAGTTAataa	1
MYBCORE	R	CNGTTR	Os02g0465900|OsARP	-1578	-1573	atatCAGTTAggca	1
MYBCORE	R	CNGTTR	Os02g0465900|OsARP	-539	-534	tttaCTGTTGatgt	1
MYBCOREATCYCB1	D	AACGG	Os02g0465900|OsARP	-2020	-2016	agagAACGGgttc	1
MYBPLANT	D	MACCWAMC	Os02g0465900|OsARP	-2888	-2881	ggtgAACCAACCtcca	1
MYBPLANT	R	MACCWAMC	Os02g0465900|OsARP	-1372	-1365	gtcaAACCTAACcgat	1
MYBPZM	D	CCWACC	Os02g0465900|OsARP	-2886	-2881	tgaaCCAACCtcca	1
MYBPZM	D	CCWACC	Os02g0465900|OsARP	-2199	-2194	taagCCTACCctta	1
MYBPZM	D	CCWACC	Os02g0465900|OsARP	-277	-272	catcCCAACCaaaa	1
MYBPZM	D	CCWACC	Os02g0465900|OsARP	-101	-96	gcgaCCAACCattt	1
MYBPZM	R	CCWACC	Os02g0465900|OsARP	-2388	-2383	gccgCCTACCtcac	1
MYBST1	D	GGATA	Os02g0465900|OsARP	-2486	-2482	ctctGGATAaaaa	1
MYBST1	R	GGATA	Os02g0465900|OsARP	-2350	-2346	ggagGGATAcaaa	1
MYBST1	R	GGATA	Os02g0465900|OsARP	-2032	-2028	ttctGGATAagct	1
MYBST1	R	GGATA	Os02g0465900|OsARP	-439	-435	tgggGGATAgggg	1
DRECRTCOREAT	D	RCCGAC	Os02g0465900|OsARP	-504	-499	cgtgGCCGACctca	1
DRECRTCOREAT	R	RCCGAC	Os02g0465900|OsARP	-1671	-1666	aaggGCCGACggaa	1
DRECRTCOREAT	R	RCCGAC	Os02g0465900|OsARP	-1654	-1649	tgcaGCCGACataa	1
DRECRTCOREAT	R	RCCGAC	Os02g0465900|OsARP	-354	-349	ggacACCGACacgc	1
START_END	DR	-	Os06g0528600|OSSPDS2	-3000	-1	-	0
NF-CO	D	CCACA	Os06g0528600|OSSPDS2	-2886	-2882	atttCCACAggga	1
NF-CO	D	CCACA	Os06g0528600|OSSPDS2	-1106	-1102	gcccCCACAgtaa	1
NF-CO	R	CCACA	Os06g0528600|OSSPDS2	-1119	-1115	ttccCCACAgtgt	1
NF-Y	D	CCAAT	Os06g0528600|OSSPDS2	-2030	-2026	gcccCCAATtttc	1
NF-Y	D	CCAAT	Os06g0528600|OSSPDS2	-1618	-1614	ccccCCAATttgt	1
NF-Y	D	CCAAT	Os06g0528600|OSSPDS2	-1554	-1550	gaatCCAATtagt	1
NF-Y	D	CCAAT	Os06g0528600|OSSPDS2	-1058	-1054	ttatCCAATgtga	1
NF-Y	D	CCAAT	Os06g0528600|OSSPDS2	-933	-929	atatCCAATttct	1
NF-Y	R	CCAAT	Os06g0528600|OSSPDS2	-2038	-2034	ggggCCAATggag	1
NF-Y	R	CCAAT	Os06g0528600|OSSPDS2	-1953	-1949	aaacCCAATtaaa	1
NF-Y	R	CCAAT	Os06g0528600|OSSPDS2	-1228	-1224	atagCCAATatta	1
NF-Y	R	CCAAT	Os06g0528600|OSSPDS2	-874	-870	agacCCAATccaa	1
NF-Y	R	CCAAT	Os06g0528600|OSSPDS2	-633	-629	gtatCCAATgtac	1
NF-Y	R	CCAAT	Os06g0528600|OSSPDS2	-67	-63	ggcaCCAATttta	1
NAP	D	TACGT	Os06g0528600|OSSPDS2	-813	-809	ccatTACGTtcac	1
ABRELATERD1	D	ACGTG	Os06g0528600|OSSPDS2	-2760	-2756	cctaACGTGatac	1
MYB1AT	D	WAACCA	Os06g0528600|OSSPDS2	-2496	-2491	gaacTAACCAagaa	1
MYB1AT	D	WAACCA	Os06g0528600|OSSPDS2	-1017	-1012	ctatAAACCAagag	1
MYB1AT	R	WAACCA	Os06g0528600|OSSPDS2	-1979	-1974	tgccTAACCAccat	1
MYB2AT	D	TAACTG	Os06g0528600|OSSPDS2	-2100	-2095	taccTAACTGaact	1
MYB2AT	D	TAACTG	Os06g0528600|OSSPDS2	-365	-360	ccgtTAACTGtagt	1
MYB2AT	R	TAACTG	Os06g0528600|OSSPDS2	-336	-331	tgctTAACTGttat	1
MYBCORE	D	CNGTTR	Os06g0528600|OSSPDS2	-2734	-2729	caacCCGTTGcttc	1
MYBCORE	D	CNGTTR	Os06g0528600|OSSPDS2	-2153	-2148	gtgaCAGTTGgagc	1
MYBCORE	D	CNGTTR	Os06g0528600|OSSPDS2	-1655	-1650	tgggCAGTTGtgca	1
MYBCORE	D	CNGTTR	Os06g0528600|OSSPDS2	-1360	-1355	tgacCGGTTAattt	1
MYBCORE	D	CNGTTR	Os06g0528600|OSSPDS2	-369	-364	ctagCCGTTAactg	1
MYBCORE	D	CNGTTR	Os06g0528600|OSSPDS2	-336	-331	ataaCAGTTAagca	1
MYBCORE	R	CNGTTR	Os06g0528600|OSSPDS2	-2597	-2592	aattCTGTTGacgc	1
MYBCORE	R	CNGTTR	Os06g0528600|OSSPDS2	-2100	-2095	agttCAGTTAggta	1
MYBCORE	R	CNGTTR	Os06g0528600|OSSPDS2	-1754	-1749	acggCTGTTAagta	1
MYBCORE	R	CNGTTR	Os06g0528600|OSSPDS2	-466	-461	ccacCTGTTAtaca	1
MYBCORE	R	CNGTTR	Os06g0528600|OSSPDS2	-365	-360	actaCAGTTAacgg	1
MYBCORE	R	CNGTTR	Os06g0528600|OSSPDS2	-339	-334	ttaaCTGTTAtaag	1
MYBCORE	R	CNGTTR	Os06g0528600|OSSPDS2	-315	-310	ggtaCAGTTGgatt	1
MYBCOREATCYCB1	D	AACGG	Os06g0528600|OSSPDS2	-2137	-2133	cgaaAACGGtcac	1
MYBCOREATCYCB1	R	AACGG	Os06g0528600|OSSPDS2	-2734	-2730	aagcAACGGgttg	1
MYBCOREATCYCB1	R	AACGG	Os06g0528600|OSSPDS2	-369	-365	agttAACGGctag	1
MYBCOREATCYCB1	R	AACGG	Os06g0528600|OSSPDS2	-141	-137	tctaAACGGcgcc	1
MYBPZM	D	CCWACC	Os06g0528600|OSSPDS2	-2739	-2734	ctagCCAACCcgtt	1
MYBST1	D	GGATA	Os06g0528600|OSSPDS2	-2230	-2226	gggaGGATAagga	1
MYBST1	D	GGATA	Os06g0528600|OSSPDS2	-1920	-1916	gtttGGATAtaag	1
MYBST1	D	GGATA	Os06g0528600|OSSPDS2	-1497	-1493	ggagGGATActta	1
MYBST1	D	GGATA	Os06g0528600|OSSPDS2	-1047	-1043	gaaaGGATAgctc	1
MYBST1	D	GGATA	Os06g0528600|OSSPDS2	-630	-626	cattGGATAcgaa	1
MYBST1	R	GGATA	Os06g0528600|OSSPDS2	-1155	-1151	agaaGGATAtgtt	1
MYBST1	R	GGATA	Os06g0528600|OSSPDS2	-1061	-1057	cattGGATAaacc	1
MYBST1	R	GGATA	Os06g0528600|OSSPDS2	-936	-932	aattGGATAtata	1
MYBST1	R	GGATA	Os06g0528600|OSSPDS2	-666	-662	tcatGGATAcaaa	1
MYBST1	R	GGATA	Os06g0528600|OSSPDS2	-575	-571	tgatGGATAgtct	1
MYBST1	R	GGATA	Os06g0528600|OSSPDS2	-252	-248	ctcgGGATAtcgc	1
MYBST1	R	GGATA	Os06g0528600|OSSPDS2	-96	-92	taagGGATAattt	1
DRECRTCOREAT	D	RCCGAC	Os06g0528600|OSSPDS2	-2396	-2391	aattACCGACattc	1
DRECRTCOREAT	R	RCCGAC	Os06g0528600|OSSPDS2	-148	-143	cggcGCCGACagta	1
START_END	DR	-	Os07g0524900|Os07g0524900	-3000	-1	-	0
NF-CO	D	CCACA	Os07g0524900|Os07g0524900	-2959	-2955	tttgCCACAtagt	1
NF-CO	D	CCACA	Os07g0524900|Os07g0524900	-2511	-2507	cttgCCACAtcat	1
NF-CO	D	CCACA	Os07g0524900|Os07g0524900	-288	-284	agcaCCACAttgt	1
NF-CO	D	CCACA	Os07g0524900|Os07g0524900	-57	-53	gctaCCACAcaca	1
NF-CO	R	CCACA	Os07g0524900|Os07g0524900	-2754	-2750	ggtgCCACAtcta	1
NF-CO	R	CCACA	Os07g0524900|Os07g0524900	-819	-815	ctggCCACAtacg	1
NF-Y	D	CCAAT	Os07g0524900|Os07g0524900	-2640	-2636	tcttCCAATacaa	1
NF-Y	D	CCAAT	Os07g0524900|Os07g0524900	-770	-766	tgcaCCAATtaaa	1
NF-Y	R	CCAAT	Os07g0524900|Os07g0524900	-2834	-2830	aaccCCAATatta	1
NF-Y	R	CCAAT	Os07g0524900|Os07g0524900	-2453	-2449	caacCCAATaact	1
NF-Y	R	CCAAT	Os07g0524900|Os07g0524900	-1694	-1690	tgcaCCAATatct	1
NF-Y	R	CCAAT	Os07g0524900|Os07g0524900	-1642	-1638	ataaCCAATacat	1
NF-Y	R	CCAAT	Os07g0524900|Os07g0524900	-1485	-1481	gacaCCAATtgtg	1
NF-YB	D	CCACATA	Os07g0524900|Os07g0524900	-2959	-2953	tttgCCACATAgtat	1
NF-YB	R	CCACATA	Os07g0524900|Os07g0524900	-821	-815	ctggCCACATAcgaa	1
NAP	D	TACGT	Os07g0524900|Os07g0524900	-2275	-2271	cgccTACGTatgc	1
NAP	D	TACGT	Os07g0524900|Os07g0524900	-2098	-2094	gaaaTACGTgtgt	1
NAP	R	TACGT	Os07g0524900|Os07g0524900	-2274	-2270	agcaTACGTaggc	1
NAP	R	TACGT	Os07g0524900|Os07g0524900	-1825	-1821	ttacTACGTgatc	1
ABRELATERD1	D	ACGTG	Os07g0524900|Os07g0524900	-2097	-2093	aaatACGTGtgtg	1
ABRELATERD1	D	ACGTG	Os07g0524900|Os07g0524900	-2053	-2049	ttgaACGTGgtaa	1
ABRELATERD1	R	ACGTG	Os07g0524900|Os07g0524900	-2262	-2258	taggACGTGagca	1
ABRELATERD1	R	ACGTG	Os07g0524900|Os07g0524900	-1826	-1822	tactACGTGatcg	1
ABRERATCAL	D	MACGYGB	Os07g0524900|Os07g0524900	-2054	-2048	tttgAACGTGGtaaa	1
MYB1AT	D	WAACCA	Os07g0524900|Os07g0524900	-2566	-2561	gtagAAACCAtgtc	1
MYB1AT	R	WAACCA	Os07g0524900|Os07g0524900	-2768	-2763	atttAAACCAtatc	1
MYB1AT	R	WAACCA	Os07g0524900|Os07g0524900	-2544	-2539	aaggAAACCAtatc	1
MYB1AT	R	WAACCA	Os07g0524900|Os07g0524900	-1886	-1881	gataTAACCAtgta	1
MYB1AT	R	WAACCA	Os07g0524900|Os07g0524900	-1640	-1635	ttaaTAACCAatac	1
MYB2AT	R	TAACTG	Os07g0524900|Os07g0524900	-790	-785	atgtTAACTGaaag	1
MYBCORE	D	CNGTTR	Os07g0524900|Os07g0524900	-951	-946	cataCGGTTAgcca	1
MYBCORE	D	CNGTTR	Os07g0524900|Os07g0524900	-790	-785	ctttCAGTTAacat	1
MYBCORE	R	CNGTTR	Os07g0524900|Os07g0524900	-1870	-1865	ttgaCTGTTGacaa	1
MYBCORE	R	CNGTTR	Os07g0524900|Os07g0524900	-1863	-1858	atctCTGTTGactg	1
MYBCORE	R	CNGTTR	Os07g0524900|Os07g0524900	-994	-989	tgcgCCGTTAggaa	1
MYBCORE	R	CNGTTR	Os07g0524900|Os07g0524900	-87	-82	ctagCTGTTAgtca	1
MYBCOREATCYCB1	D	AACGG	Os07g0524900|Os07g0524900	-993	-989	tcctAACGGcgca	1
MYBPLANT	D	MACCWAMC	Os07g0524900|Os07g0524900	-681	-674	tgtcAACCTAACctga	1
MYBPZM	R	CCWACC	Os07g0524900|Os07g0524900	-2449	-2444	attcCCAACCcaat	1
MYBST1	R	GGATA	Os07g0524900|Os07g0524900	-1939	-1935	tcttGGATAcaaa	1
MYBST1	R	GGATA	Os07g0524900|Os07g0524900	-1809	-1805	attaGGATAgaag	1
MYBST1	R	GGATA	Os07g0524900|Os07g0524900	-1727	-1723	agggGGATAaggg	1
MYBST1	R	GGATA	Os07g0524900|Os07g0524900	-870	-866	tgttGGATAaagc	1
MYBST1	R	GGATA	Os07g0524900|Os07g0524900	-712	-708	gcaaGGATAtcat	1
START_END	DR	-	Os01g0639900|BETACA1	-3000	-1	-	0
NF-CO	D	CCACA	Os01g0639900|BETACA1	-653	-649	acagCCACAaacc	1
NF-CO	D	CCACA	Os01g0639900|BETACA1	-645	-641	aaacCCACAatta	1
NF-CO	D	CCACA	Os01g0639900|BETACA1	-553	-549	cgttCCACAcctc	1
NF-CO	D	CCACA	Os01g0639900|BETACA1	-535	-531	gccaCCACAtccg	1
NF-CO	D	CCACA	Os01g0639900|BETACA1	-446	-442	aaatCCACAtcca	1
NF-CO	D	CCACA	Os01g0639900|BETACA1	-440	-436	acatCCACAtctc	1
NF-CO	D	CCACA	Os01g0639900|BETACA1	-416	-412	ccacCCACAacct	1
NF-CO	R	CCACA	Os01g0639900|BETACA1	-313	-309	tggtCCACAcgcg	1
NF-CO	R	CCACA	Os01g0639900|BETACA1	-237	-233	cgcgCCACAcgcg	1
NF-Y	D	CCAAT	Os01g0639900|BETACA1	-846	-842	cggcCCAATtaat	1
NF-Y	D	CCAAT	Os01g0639900|BETACA1	-673	-669	acgaCCAATccgt	1
NF-Y	R	CCAAT	Os01g0639900|BETACA1	-2975	-2971	agcgCCAATtcgc	1
NF-Y	R	CCAAT	Os01g0639900|BETACA1	-1118	-1114	ttttCCAATatta	1
NAP	D	TACGT	Os01g0639900|BETACA1	-2193	-2189	accgTACGTaaaa	1
NAP	R	TACGT	Os01g0639900|BETACA1	-2377	-2373	atcaTACGTttgt	1
NAP	R	TACGT	Os01g0639900|BETACA1	-2192	-2188	ctttTACGTacgg	1
NAP	R	TACGT	Os01g0639900|BETACA1	-124	-120	tgcgTACGTgact	1
ABRELATERD1	D	ACGTG	Os01g0639900|BETACA1	-741	-737	gccaACGTGtatc	1
ABRELATERD1	R	ACGTG	Os01g0639900|BETACA1	-559	-555	tggaACGTGtgat	1
ABRELATERD1	R	ACGTG	Os01g0639900|BETACA1	-125	-121	gcgtACGTGactg	1
ABRERATCAL	D	MACGYGB	Os01g0639900|BETACA1	-742	-736	agccAACGTGTatca	1
ABRERATCAL	D	MACGYGB	Os01g0639900|BETACA1	-53	-47	tcggCACGCGGgggc	1
ABRERATCAL	R	MACGYGB	Os01g0639900|BETACA1	-560	-554	gtggAACGTGTgatc	1
ABRERATCAL	R	MACGYGB	Os01g0639900|BETACA1	-318	-312	tccaCACGCGCgcgg	1
ABRERATCAL	R	MACGYGB	Os01g0639900|BETACA1	-266	-260	cgatAACGCGCcgcg	1
ABRERATCAL	R	MACGYGB	Os01g0639900|BETACA1	-242	-236	gccaCACGCGCgcgg	1
MYB1AT	D	WAACCA	Os01g0639900|BETACA1	-899	-894	cagaAAACCAaggc	1
MYB1AT	R	WAACCA	Os01g0639900|BETACA1	-2458	-2453	atgaAAACCAtatt	1
MYB2AT	D	TAACTG	Os01g0639900|BETACA1	-2272	-2267	cgttTAACTGttca	1
MYBCORE	D	CNGTTR	Os01g0639900|BETACA1	-2422	-2417	ttggCAGTTGagaa	1
MYBCORE	D	CNGTTR	Os01g0639900|BETACA1	-286	-281	ggaaCCGTTGgcca	1
MYBCORE	R	CNGTTR	Os01g0639900|BETACA1	-2272	-2267	tgaaCAGTTAaacg	1
MYBCORE	R	CNGTTR	Os01g0639900|BETACA1	-406	-401	cgcgCCGTTGcagg	1
MYBCORE	R	CNGTTR	Os01g0639900|BETACA1	-393	-388	tttgCGGTTGggtc	1
MYBCOREATCYCB1	D	AACGG	Os01g0639900|BETACA1	-2493	-2489	acaaAACGGggac	1
MYBCOREATCYCB1	D	AACGG	Os01g0639900|BETACA1	-858	-854	ctggAACGGcccc	1
MYBCOREATCYCB1	D	AACGG	Os01g0639900|BETACA1	-405	-401	ctgcAACGGcgcg	1
MYBCOREATCYCB1	R	AACGG	Os01g0639900|BETACA1	-286	-282	ggccAACGGttcc	1
MYBPZM	D	CCWACC	Os01g0639900|BETACA1	-511	-506	cggcCCAACCcccc	1
MYBPZM	D	CCWACC	Os01g0639900|BETACA1	-394	-389	cgacCCAACCgcaa	1
MYBST1	D	GGATA	Os01g0639900|BETACA1	-2826	-2822	aggcGGATAtcat	1
MYBST1	R	GGATA	Os01g0639900|BETACA1	-249	-245	gcgcGGATAggct	1
DRECRTCOREAT	R	RCCGAC	Os01g0639900|BETACA1	-58	-53	gcgtGCCGACaacc	1
START_END	DR	-	Os01g0733500|RD22	-3000	-1	-	0
NF-CO	D	CCACA	Os01g0733500|RD22	-2739	-2735	tccaCCACAaggc	1
NF-CO	D	CCACA	Os01g0733500|RD22	-754	-750	ttttCCACActcc	1
NF-CO	R	CCACA	Os01g0733500|RD22	-2574	-2570	cctgCCACAtttt	1
NF-CO	R	CCACA	Os01g0733500|RD22	-2014	-2010	attaCCACAttgc	1
NF-CO	R	CCACA	Os01g0733500|RD22	-278	-274	gcagCCACAattg	1
NF-Y	D	CCAAT	Os01g0733500|RD22	-2841	-2837	acatCCAATggag	1
NF-Y	D	CCAAT	Os01g0733500|RD22	-2636	-2632	ttctCCAATtttc	1
NF-Y	D	CCAAT	Os01g0733500|RD22	-1875	-1871	ccacCCAATaaaa	1
NF-Y	D	CCAAT	Os01g0733500|RD22	-283	-279	tgagCCAATtgtg	1
NF-Y	D	CCAAT	Os01g0733500|RD22	-75	-71	tgtgCCAATttaa	1
NF-Y	R	CCAAT	Os01g0733500|RD22	-2029	-2025	tgtgCCAATaagg	1
NF-Y	R	CCAAT	Os01g0733500|RD22	-1366	-1362	gcaaCCAATcgag	1
NF-Y	R	CCAAT	Os01g0733500|RD22	-480	-476	cggaCCAATccat	1
NAP	D	TACGT	Os01g0733500|RD22	-1406	-1402	tcacTACGTaact	1
NAP	R	TACGT	Os01g0733500|RD22	-2246	-2242	acgtTACGTgcga	1
NAP	R	TACGT	Os01g0733500|RD22	-2207	-2203	taatTACGTcgtg	1
NAP	R	TACGT	Os01g0733500|RD22	-1405	-1401	gagtTACGTagtg	1
NAP	R	TACGT	Os01g0733500|RD22	-849	-845	gccaTACGTcgcg	1
NACR	D	CACGCA	Os01g0733500|RD22	-2378	-2373	ccgaCACGCAcacc	1
NACR	D	CACGCA	Os01g0733500|RD22	-717	-712	catgCACGCAaagt	1
NACR	D	CACGCA	Os01g0733500|RD22	-645	-640	gataCACGCActcg	1
ABRELATERD1	D	ACGTG	Os01g0733500|RD22	-617	-613	tacaACGTGcacg	1
ABRELATERD1	R	ACGTG	Os01g0733500|RD22	-2247	-2243	cgttACGTGcgag	1
ABRERATCAL	D	MACGYGB	Os01g0733500|RD22	-618	-612	gtacAACGTGCacgg	1
ABRERATCAL	D	MACGYGB	Os01g0733500|RD22	-395	-389	gatcCACGCGTtggc	1
ABRERATCAL	R	MACGYGB	Os01g0733500|RD22	-1562	-1556	ggttAACGCGCcatg	1
ABRERATCAL	R	MACGYGB	Os01g0733500|RD22	-394	-388	tgccAACGCGTggat	1
ABRERATCAL	R	MACGYGB	Os01g0733500|RD22	-212	-206	ctgaCACGCGGagat	1
MYB1AT	D	WAACCA	Os01g0733500|RD22	-2310	-2305	tagtTAACCAtcgc	1
MYB1AT	D	WAACCA	Os01g0733500|RD22	-1556	-1551	gcgtTAACCAactc	1
MYB1AT	R	WAACCA	Os01g0733500|RD22	-1609	-1604	cattAAACCActgg	1
MYB1AT	R	WAACCA	Os01g0733500|RD22	-1542	-1537	ccagTAACCAccga	1
MYB1AT	R	WAACCA	Os01g0733500|RD22	-155	-150	caagTAACCAgtgt	1
MYB2AT	D	TAACTG	Os01g0733500|RD22	-243	-238	ccggTAACTGttag	1
MYB2AT	R	TAACTG	Os01g0733500|RD22	-1100	-1095	ctctTAACTGcttt	1
MYBCORE	D	CNGTTR	Os01g0733500|RD22	-2526	-2521	atgaCTGTTAggtt	1
MYBCORE	D	CNGTTR	Os01g0733500|RD22	-1100	-1095	aaagCAGTTAagag	1
MYBCORE	D	CNGTTR	Os01g0733500|RD22	-291	-286	gggaCGGTTGagcc	1
MYBCORE	D	CNGTTR	Os01g0733500|RD22	-240	-235	gtaaCTGTTAggtg	1
MYBCORE	D	CNGTTR	Os01g0733500|RD22	-143	-138	tgtaCTGTTAcagg	1
MYBCORE	R	CNGTTR	Os01g0733500|RD22	-2587	-2582	tttgCAGTTGcttt	1
MYBCORE	R	CNGTTR	Os01g0733500|RD22	-2511	-2506	ttggCCGTTGcacc	1
MYBCORE	R	CNGTTR	Os01g0733500|RD22	-1008	-1003	gagaCTGTTAgtta	1
MYBCORE	R	CNGTTR	Os01g0733500|RD22	-999	-994	aacaCTGTTGagac	1
MYBCORE	R	CNGTTR	Os01g0733500|RD22	-785	-780	ctttCGGTTGggag	1
MYBCORE	R	CNGTTR	Os01g0733500|RD22	-417	-412	ttgaCGGTTGcacg	1
MYBCORE	R	CNGTTR	Os01g0733500|RD22	-410	-405	cctcCGGTTGacgg	1
MYBCORE	R	CNGTTR	Os01g0733500|RD22	-243	-238	ctaaCAGTTAccgg	1
MYBCOREATCYCB1	D	AACGG	Os01g0733500|RD22	-2937	-2933	tttgAACGGaatt	1
MYBCOREATCYCB1	D	AACGG	Os01g0733500|RD22	-2920	-2916	tttgAACGGaata	1
MYBCOREATCYCB1	D	AACGG	Os01g0733500|RD22	-2510	-2506	gtgcAACGGccaa	1
MYBCOREATCYCB1	D	AACGG	Os01g0733500|RD22	-1854	-1850	ttggAACGGatga	1
MYBPLANT	R	MACCWAMC	Os01g0733500|RD22	-2524	-2517	acctAACCTAACagtc	1
MYBPLANT	R	MACCWAMC	Os01g0733500|RD22	-238	-231	ggtaCACCTAACagtt	1
MYBPZM	D	CCWACC	Os01g0733500|RD22	-2230	-2225	actaCCAACCaacg	1
MYBPZM	D	CCWACC	Os01g0733500|RD22	-2219	-2214	acgtCCAACCtcca	1
MYBPZM	D	CCWACC	Os01g0733500|RD22	-901	-896	ttcgCCAACCatga	1
MYBPZM	D	CCWACC	Os01g0733500|RD22	-786	-781	actcCCAACCgaaa	1
MYBST1	D	GGATA	Os01g0733500|RD22	-1938	-1934	atctGGATAataa	1
MYBST1	D	GGATA	Os01g0733500|RD22	-1923	-1919	atctGGATAataa	1
DRECRTCOREAT	R	RCCGAC	Os01g0733500|RD22	-1639	-1634	aaagACCGACaaat	1
DRECRTCOREAT	R	RCCGAC	Os01g0733500|RD22	-1380	-1375	ctgcACCGACacta	1
START_END	DR	-	Os10g0516100|OsGDCH	-3000	-1	-	0
NF-CO	D	CCACA	Os10g0516100|OsGDCH	-2536	-2532	caagCCACAtacg	1
NF-CO	D	CCACA	Os10g0516100|OsGDCH	-2340	-2336	atgaCCACAgcat	1
NF-CO	D	CCACA	Os10g0516100|OsGDCH	-1213	-1209	ctatCCACAtaaa	1
NF-CO	R	CCACA	Os10g0516100|OsGDCH	-2482	-2478	tctcCCACAtgca	1
NF-Y	D	CCAAT	Os10g0516100|OsGDCH	-2816	-2812	tagaCCAATggca	1
NF-Y	D	CCAAT	Os10g0516100|OsGDCH	-2686	-2682	ggtaCCAATtatg	1
NF-Y	D	CCAAT	Os10g0516100|OsGDCH	-2327	-2323	tgccCCAATgaca	1
NF-Y	D	CCAAT	Os10g0516100|OsGDCH	-1454	-1450	ggctCCAATaatc	1
NF-Y	D	CCAAT	Os10g0516100|OsGDCH	-367	-363	ccgaCCAATctcg	1
NF-Y	R	CCAAT	Os10g0516100|OsGDCH	-2656	-2652	gaggCCAATaaga	1
NF-Y	R	CCAAT	Os10g0516100|OsGDCH	-2462	-2458	attgCCAATtact	1
NF-Y	R	CCAAT	Os10g0516100|OsGDCH	-1826	-1822	taatCCAATtatt	1
NF-Y	R	CCAAT	Os10g0516100|OsGDCH	-1344	-1340	accaCCAATtaac	1
NF-YB	D	CCACATA	Os10g0516100|OsGDCH	-2536	-2530	caagCCACATAcgca	1
NF-YB	D	CCACATA	Os10g0516100|OsGDCH	-1213	-1207	ctatCCACATAaaaa	1
NACR	D	CACGCA	Os10g0516100|OsGDCH	-289	-284	taacCACGCAcagt	1
ABRELATERD1	D	ACGTG	Os10g0516100|OsGDCH	-450	-446	catcACGTGaaac	1
ABRELATERD1	R	ACGTG	Os10g0516100|OsGDCH	-2709	-2705	gttaACGTGctac	1
ABRELATERD1	R	ACGTG	Os10g0516100|OsGDCH	-451	-447	tttcACGTGatgt	1
ABRERATCAL	R	MACGYGB	Os10g0516100|OsGDCH	-2710	-2704	ggttAACGTGCtact	1
MYB1AT	D	WAACCA	Os10g0516100|OsGDCH	-2544	-2539	gattAAACCAagcc	1
MYB1AT	D	WAACCA	Os10g0516100|OsGDCH	-677	-672	tcagTAACCAacca	1
MYB1AT	D	WAACCA	Os10g0516100|OsGDCH	-293	-288	ctggTAACCAcgca	1
MYB1AT	R	WAACCA	Os10g0516100|OsGDCH	-2751	-2746	cgatTAACCAttct	1
MYB2AT	D	TAACTG	Os10g0516100|OsGDCH	-1384	-1379	catgTAACTGacgg	1
MYB2AT	D	TAACTG	Os10g0516100|OsGDCH	-221	-216	cagtTAACTGaact	1
MYB2AT	D	TAACTG	Os10g0516100|OsGDCH	-144	-139	taatTAACTGagta	1
MYB2AT	R	TAACTG	Os10g0516100|OsGDCH	-1993	-1988	atgcTAACTGccat	1
MYB2AT	R	TAACTG	Os10g0516100|OsGDCH	-1350	-1345	caatTAACTGatta	1
MYB2AT	R	TAACTG	Os10g0516100|OsGDCH	-225	-220	cagtTAACTGtcaa	1
MYBCORE	D	CNGTTR	Os10g0516100|OsGDCH	-2562	-2557	ttacCGGTTAacaa	1
MYBCORE	D	CNGTTR	Os10g0516100|OsGDCH	-2199	-2194	aatgCAGTTGggtt	1
MYBCORE	D	CNGTTR	Os10g0516100|OsGDCH	-2077	-2072	tcatCGGTTGatca	1
MYBCORE	D	CNGTTR	Os10g0516100|OsGDCH	-2034	-2029	gcagCTGTTGttaa	1
MYBCORE	D	CNGTTR	Os10g0516100|OsGDCH	-2008	-2003	ttctCTGTTGttgc	1
MYBCORE	D	CNGTTR	Os10g0516100|OsGDCH	-1993	-1988	atggCAGTTAgcat	1
MYBCORE	D	CNGTTR	Os10g0516100|OsGDCH	-1665	-1660	agttCAGTTGatat	1
MYBCORE	D	CNGTTR	Os10g0516100|OsGDCH	-1412	-1407	cctaCAGTTGatcc	1
MYBCORE	D	CNGTTR	Os10g0516100|OsGDCH	-1350	-1345	taatCAGTTAattg	1
MYBCORE	D	CNGTTR	Os10g0516100|OsGDCH	-536	-531	ttatCAGTTGcaca	1
MYBCORE	D	CNGTTR	Os10g0516100|OsGDCH	-232	-227	acagCCGTTGacag	1
MYBCORE	D	CNGTTR	Os10g0516100|OsGDCH	-225	-220	ttgaCAGTTAactg	1
MYBCORE	R	CNGTTR	Os10g0516100|OsGDCH	-2723	-2718	tgctCTGTTAgttg	1
MYBCORE	R	CNGTTR	Os10g0516100|OsGDCH	-1384	-1379	ccgtCAGTTAcatg	1
MYBCORE	R	CNGTTR	Os10g0516100|OsGDCH	-1000	-995	attcCCGTTAatgc	1
MYBCORE	R	CNGTTR	Os10g0516100|OsGDCH	-703	-698	gcagCAGTTGagac	1
MYBCORE	R	CNGTTR	Os10g0516100|OsGDCH	-418	-413	acctCAGTTGcagg	1
MYBCORE	R	CNGTTR	Os10g0516100|OsGDCH	-221	-216	agttCAGTTAactg	1
MYBCORE	R	CNGTTR	Os10g0516100|OsGDCH	-144	-139	tactCAGTTAatta	1
MYBCOREATCYCB1	D	AACGG	Os10g0516100|OsGDCH	-999	-995	cattAACGGgaat	1
MYBCOREATCYCB1	R	AACGG	Os10g0516100|OsGDCH	-2413	-2409	atcaAACGGtact	1
MYBCOREATCYCB1	R	AACGG	Os10g0516100|OsGDCH	-232	-228	tgtcAACGGctgt	1
MYBPLANT	D	MACCWAMC	Os10g0516100|OsGDCH	-888	-881	atccAACCAAACattc	1
MYBPLANT	D	MACCWAMC	Os10g0516100|OsGDCH	-676	-669	cagtAACCAACCattt	1
MYBPLANT	D	MACCWAMC	Os10g0516100|OsGDCH	-49	-42	caccCACCAACCatac	1
MYBPLANT	R	MACCWAMC	Os10g0516100|OsGDCH	-2226	-2219	catcAACCAACCtata	1
MYBPLANT	R	MACCWAMC	Os10g0516100|OsGDCH	-1708	-1701	caagAACCAAACatca	1
MYBPZM	D	CCWACC	Os10g0516100|OsGDCH	-890	-885	tgatCCAACCaaac	1
MYBPZM	D	CCWACC	Os10g0516100|OsGDCH	-674	-669	gtaaCCAACCattt	1
MYBPZM	D	CCWACC	Os10g0516100|OsGDCH	-47	-42	cccaCCAACCatac	1
MYBPZM	R	CCWACC	Os10g0516100|OsGDCH	-2226	-2221	tcaaCCAACCtata	1
MYBPZM	R	CCWACC	Os10g0516100|OsGDCH	-518	-513	aaatCCAACCagat	1
MYBST1	D	GGATA	Os10g0516100|OsGDCH	-2877	-2873	ccatGGATAaggt	1
MYBST1	D	GGATA	Os10g0516100|OsGDCH	-2348	-2344	tgctGGATAtgac	1
MYBST1	D	GGATA	Os10g0516100|OsGDCH	-1019	-1015	aactGGATAtaat	1
MYBST1	D	GGATA	Os10g0516100|OsGDCH	-981	-977	cactGGATAtgag	1
MYBST1	R	GGATA	Os10g0516100|OsGDCH	-2835	-2831	aggaGGATAagat	1
MYBST1	R	GGATA	Os10g0516100|OsGDCH	-1785	-1781	agtaGGATAcctt	1
MYBST1	R	GGATA	Os10g0516100|OsGDCH	-1216	-1212	atgtGGATAgcaa	1
MYBST1	R	GGATA	Os10g0516100|OsGDCH	-31	-27	gcagGGATAggat	1
DRECRTCOREAT	D	RCCGAC	Os10g0516100|OsGDCH	-459	-454	atctGCCGACatca	1
DRECRTCOREAT	D	RCCGAC	Os10g0516100|OsGDCH	-372	-367	tttgACCGACcaat	1
START_END	DR	-	Os10g0530500|OsGSTU13	-3000	-1	-	0
NF-CO	R	CCACA	Os10g0530500|OsGSTU13	-1886	-1882	cacaCCACAcaaa	1
NF-CO	R	CCACA	Os10g0530500|OsGSTU13	-1816	-1812	agcaCCACAtatc	1
NF-CO	R	CCACA	Os10g0530500|OsGSTU13	-1745	-1741	tcatCCACAtgct	1
NF-CO	R	CCACA	Os10g0530500|OsGSTU13	-171	-167	gtcgCCACAagct	1
NF-Y	D	CCAAT	Os10g0530500|OsGSTU13	-2138	-2134	caccCCAATttat	1
NF-Y	D	CCAAT	Os10g0530500|OsGSTU13	-1949	-1945	gtcaCCAATaaaa	1
NF-Y	D	CCAAT	Os10g0530500|OsGSTU13	-1898	-1894	gatgCCAATaagt	1
NF-Y	D	CCAAT	Os10g0530500|OsGSTU13	-1515	-1511	cctaCCAATaatc	1
NF-Y	D	CCAAT	Os10g0530500|OsGSTU13	-1329	-1325	ctaaCCAATgaac	1
NF-Y	D	CCAAT	Os10g0530500|OsGSTU13	-1181	-1177	agctCCAATcaaa	1
NF-Y	R	CCAAT	Os10g0530500|OsGSTU13	-1768	-1764	ttttCCAATcaac	1
NF-Y	R	CCAAT	Os10g0530500|OsGSTU13	-1703	-1699	ttaaCCAATctga	1
NF-Y	R	CCAAT	Os10g0530500|OsGSTU13	-1686	-1682	aggcCCAATagaa	1
NF-YB	R	CCACATA	Os10g0530500|OsGSTU13	-1818	-1812	agcaCCACATAtcgc	1
NAP	R	TACGT	Os10g0530500|OsGSTU13	-1058	-1054	agacTACGTttaa	1
ABRELATERD1	D	ACGTG	Os10g0530500|OsGSTU13	-2554	-2550	ggcgACGTGagcc	1
ABRELATERD1	D	ACGTG	Os10g0530500|OsGSTU13	-726	-722	tacgACGTGagaa	1
ABRELATERD1	D	ACGTG	Os10g0530500|OsGSTU13	-50	-46	gacgACGTGaagg	1
ABRERATCAL	R	MACGYGB	Os10g0530500|OsGSTU13	-10	-4	gcgCACGCGGatcg	1
MYB1AT	D	WAACCA	Os10g0530500|OsGSTU13	-1332	-1327	caccTAACCAatga	1
MYB1AT	R	WAACCA	Os10g0530500|OsGSTU13	-2025	-2020	acatTAACCAgaat	1
MYB1AT	R	WAACCA	Os10g0530500|OsGSTU13	-1701	-1696	tcctTAACCAatct	1
MYB1AT	R	WAACCA	Os10g0530500|OsGSTU13	-1638	-1633	tgagAAACCAagta	1
MYB1AT	R	WAACCA	Os10g0530500|OsGSTU13	-1557	-1552	tcatAAACCAgtag	1
MYB1AT	R	WAACCA	Os10g0530500|OsGSTU13	-362	-357	taatTAACCAacat	1
MYB2AT	D	TAACTG	Os10g0530500|OsGSTU13	-637	-632	ccagTAACTGtagt	1
MYBCORE	D	CNGTTR	Os10g0530500|OsGSTU13	-304	-299	cttgCAGTTGcact	1
MYBCORE	R	CNGTTR	Os10g0530500|OsGSTU13	-2967	-2962	cgggCCGTTGcccc	1
MYBCORE	R	CNGTTR	Os10g0530500|OsGSTU13	-637	-632	actaCAGTTActgg	1
MYBCOREATCYCB1	D	AACGG	Os10g0530500|OsGSTU13	-2966	-2962	gggcAACGGcccg	1
MYBCOREATCYCB1	D	AACGG	Os10g0530500|OsGSTU13	-705	-701	tctaAACGGcggg	1
MYBCOREATCYCB1	D	AACGG	Os10g0530500|OsGSTU13	-148	-144	ccaaAACGGgtgg	1
MYBCOREATCYCB1	R	AACGG	Os10g0530500|OsGSTU13	-2398	-2394	cgggAACGGcggc	1
MYBCOREATCYCB1	R	AACGG	Os10g0530500|OsGSTU13	-561	-557	ggaaAACGGatcg	1
MYBCOREATCYCB1	R	AACGG	Os10g0530500|OsGSTU13	-21	-17	cgcgAACGGgctc	1
MYBPLANT	D	MACCWAMC	Os10g0530500|OsGSTU13	-1336	-1329	agttCACCTAACcaat	1
MYBPLANT	R	MACCWAMC	Os10g0530500|OsGSTU13	-650	-643	tggcCACCTAACgctt	1
MYBPZM	D	CCWACC	Os10g0530500|OsGSTU13	-1519	-1514	atatCCTACCaata	1
MYBPZM	R	CCWACC	Os10g0530500|OsGSTU13	-1731	-1726	aagcCCAACCattg	1
MYBST1	D	GGATA	Os10g0530500|OsGSTU13	-2320	-2316	gagaGGATAagtg	1
MYBST1	D	GGATA	Os10g0530500|OsGSTU13	-1300	-1296	attcGGATAagcc	1
MYBST1	D	GGATA	Os10g0530500|OsGSTU13	-1088	-1084	catcGGATAtaag	1
MYBST1	R	GGATA	Os10g0530500|OsGSTU13	-1522	-1518	ggtaGGATAtttt	1
MYBST1	R	GGATA	Os10g0530500|OsGSTU13	-137	-133	tgcaGGATAggcc	1
DRECRTCOREAT	R	RCCGAC	Os10g0530500|OsGSTU13	-2712	-2707	ggagGCCGACgggg	1
DRECRTCOREAT	R	RCCGAC	Os10g0530500|OsGSTU13	-2603	-2598	gaagGCCGACgggg	1
START_END	DR	-	Os12g0428000|OsStr7	-3000	-1	-	0
NF-CO	D	CCACA	Os12g0428000|OsStr7	-1978	-1974	cataCCACActac	1
NF-CO	D	CCACA	Os12g0428000|OsStr7	-1869	-1865	tctcCCACActgc	1
NF-CO	D	CCACA	Os12g0428000|OsStr7	-1362	-1358	taacCCACAaggt	1
NF-CO	D	CCACA	Os12g0428000|OsStr7	-1306	-1302	taacCCACAaagg	1
NF-CO	R	CCACA	Os12g0428000|OsStr7	-2513	-2509	tggcCCACAccat	1
NF-CO	R	CCACA	Os12g0428000|OsStr7	-1955	-1951	aactCCACAtgtg	1
NF-Y	D	CCAAT	Os12g0428000|OsStr7	-2698	-2694	acttCCAATaaac	1
NF-Y	D	CCAAT	Os12g0428000|OsStr7	-2250	-2246	tctaCCAATtatt	1
NF-Y	D	CCAAT	Os12g0428000|OsStr7	-1703	-1699	gtagCCAATttgc	1
NF-Y	D	CCAAT	Os12g0428000|OsStr7	-1593	-1589	ataaCCAATcaat	1
NF-Y	D	CCAAT	Os12g0428000|OsStr7	-60	-56	caaaCCAATaatg	1
NF-Y	R	CCAAT	Os12g0428000|OsStr7	-2433	-2429	ctatCCAATgtct	1
NF-Y	R	CCAAT	Os12g0428000|OsStr7	-2144	-2140	gcctCCAATgctt	1
NAP	D	TACGT	Os12g0428000|OsStr7	-2995	-2991	attaTACGTgtta	1
NAP	D	TACGT	Os12g0428000|OsStr7	-989	-985	atccTACGTatga	1
NAP	R	TACGT	Os12g0428000|OsStr7	-988	-984	ctcaTACGTagga	1
ABRELATERD1	D	ACGTG	Os12g0428000|OsStr7	-2994	-2990	ttatACGTGttac	1
ABRELATERD1	D	ACGTG	Os12g0428000|OsStr7	-2967	-2963	cgtcACGTGactc	1
ABRELATERD1	D	ACGTG	Os12g0428000|OsStr7	-2642	-2638	cgtcACGTGacgc	1
ABRELATERD1	R	ACGTG	Os12g0428000|OsStr7	-2968	-2964	agtcACGTGacga	1
ABRELATERD1	R	ACGTG	Os12g0428000|OsStr7	-2643	-2639	cgtcACGTGacga	1
ABRERATCAL	R	MACGYGB	Os12g0428000|OsStr7	-2677	-2671	tgtcCACGCGGtggc	1
MYB1AT	D	WAACCA	Os12g0428000|OsStr7	-2864	-2859	atttTAACCAttag	1
MYB1AT	D	WAACCA	Os12g0428000|OsStr7	-1596	-1591	ttcaTAACCAatca	1
MYB1AT	D	WAACCA	Os12g0428000|OsStr7	-63	-58	aatcAAACCAataa	1
MYB1AT	R	WAACCA	Os12g0428000|OsStr7	-565	-560	tgttTAACCActca	1
MYBCORE	D	CNGTTR	Os12g0428000|OsStr7	-2815	-2810	agatCGGTTAtatc	1
MYBCORE	D	CNGTTR	Os12g0428000|OsStr7	-472	-467	ttatCTGTTAgtag	1
MYBPZM	D	CCWACC	Os12g0428000|OsStr7	-168	-163	atggCCTACCtagc	1
MYBPZM	R	CCWACC	Os12g0428000|OsStr7	-248	-243	atgcCCTACCtagc	1
MYBST1	D	GGATA	Os12g0428000|OsStr7	-2826	-2822	ttacGGATAtgag	1
MYBST1	D	GGATA	Os12g0428000|OsStr7	-2430	-2426	cattGGATAgtag	1
MYBST1	D	GGATA	Os12g0428000|OsStr7	-1730	-1726	caaaGGATAcagt	1
MYBST1	R	GGATA	Os12g0428000|OsStr7	-2616	-2612	tataGGATAttat	1
MYBST1	R	GGATA	Os12g0428000|OsStr7	-751	-747	tgaaGGATAattg	1
MYBST1	R	GGATA	Os12g0428000|OsStr7	-634	-630	ctttGGATAataa	1
START_END	DR	-	Os06g0129400|OsSPX-MFS3	-3000	-1	-	0
NF-CO	D	CCACA	Os06g0129400|OsSPX-MFS3	-2294	-2290	aaatCCACAtgca	1
NF-CO	D	CCACA	Os06g0129400|OsSPX-MFS3	-2197	-2193	tagcCCACAtcag	1
NF-CO	D	CCACA	Os06g0129400|OsSPX-MFS3	-1696	-1692	acaaCCACAgttc	1
NF-CO	D	CCACA	Os06g0129400|OsSPX-MFS3	-387	-383	gggaCCACAtata	1
NF-CO	R	CCACA	Os06g0129400|OsSPX-MFS3	-1124	-1120	ctgaCCACAagat	1
NF-CO	R	CCACA	Os06g0129400|OsSPX-MFS3	-1030	-1026	aacaCCACAccat	1
NF-CO	R	CCACA	Os06g0129400|OsSPX-MFS3	-865	-861	atggCCACAcacg	1
NF-CO	R	CCACA	Os06g0129400|OsSPX-MFS3	-629	-625	aagtCCACAtcat	1
NF-CO	R	CCACA	Os06g0129400|OsSPX-MFS3	-72	-68	gtgtCCACAtcac	1
NF-Y	D	CCAAT	Os06g0129400|OsSPX-MFS3	-2940	-2936	tactCCAATattc	1
NF-Y	D	CCAAT	Os06g0129400|OsSPX-MFS3	-436	-432	gtagCCAATtgca	1
NF-Y	R	CCAAT	Os06g0129400|OsSPX-MFS3	-335	-331	gactCCAATtcac	1
NF-YB	D	CCACATA	Os06g0129400|OsSPX-MFS3	-387	-381	gggaCCACATAtaaa	1
NAP	D	TACGT	Os06g0129400|OsSPX-MFS3	-2028	-2024	caaaTACGTcagt	1
NACR	R	CACGCA	Os06g0129400|OsSPX-MFS3	-1981	-1976	aacgCACGCAatca	1
NACR	R	CACGCA	Os06g0129400|OsSPX-MFS3	-1669	-1664	aactCACGCAgttc	1
NACR	R	CACGCA	Os06g0129400|OsSPX-MFS3	-1560	-1555	tgttCACGCAaccc	1
NACR	R	CACGCA	Os06g0129400|OsSPX-MFS3	-871	-866	cacaCACGCAacag	1
ABRELATERD1	D	ACGTG	Os06g0129400|OsSPX-MFS3	-2904	-2900	ttccACGTGaagt	1
ABRELATERD1	D	ACGTG	Os06g0129400|OsSPX-MFS3	-257	-253	gagaACGTGcggc	1
ABRELATERD1	D	ACGTG	Os06g0129400|OsSPX-MFS3	-85	-81	cgccACGTGgcgt	1
ABRELATERD1	R	ACGTG	Os06g0129400|OsSPX-MFS3	-2905	-2901	cttcACGTGgaat	1
ABRELATERD1	R	ACGTG	Os06g0129400|OsSPX-MFS3	-86	-82	cgccACGTGgcgc	1
ABRERATCAL	D	MACGYGB	Os06g0129400|OsSPX-MFS3	-258	-252	agagAACGTGCggcc	1
ABRERATCAL	D	MACGYGB	Os06g0129400|OsSPX-MFS3	-227	-221	caccCACGCGCgcat	1
ABRERATCAL	D	MACGYGB	Os06g0129400|OsSPX-MFS3	-86	-80	gcgcCACGTGGcgtg	1
ABRERATCAL	R	MACGYGB	Os06g0129400|OsSPX-MFS3	-2906	-2900	acttCACGTGGaatt	1
ABRERATCAL	R	MACGYGB	Os06g0129400|OsSPX-MFS3	-87	-81	acgcCACGTGGcgct	1
ABREATCONSENSUS	D	YACGTGGC	Os06g0129400|OsSPX-MFS3	-86	-79	gcgcCACGTGGCgtgt	1
ABREATCONSENSUS	R	YACGTGGC	Os06g0129400|OsSPX-MFS3	-88	-81	acgcCACGTGGCgctc	1
MYB1AT	D	WAACCA	Os06g0129400|OsSPX-MFS3	-1160	-1155	agccAAACCAactt	1
MYB1AT	R	WAACCA	Os06g0129400|OsSPX-MFS3	-2788	-2783	aattAAACCAggag	1
MYB1AT	R	WAACCA	Os06g0129400|OsSPX-MFS3	-775	-770	aaatAAACCAtgat	1
MYB2AT	R	TAACTG	Os06g0129400|OsSPX-MFS3	-1767	-1762	cgccTAACTGacct	1
MYB2AT	R	TAACTG	Os06g0129400|OsSPX-MFS3	-502	-497	tttaTAACTGgcta	1
MYBCORE	D	CNGTTR	Os06g0129400|OsSPX-MFS3	-2915	-2910	ttgcCCGTTAattc	1
MYBCORE	D	CNGTTR	Os06g0129400|OsSPX-MFS3	-2103	-2098	tcgaCCGTTGataa	1
MYBCORE	D	CNGTTR	Os06g0129400|OsSPX-MFS3	-1767	-1762	aggtCAGTTAggcg	1
MYBCORE	D	CNGTTR	Os06g0129400|OsSPX-MFS3	-1323	-1318	atttCAGTTGatta	1
MYBCORE	D	CNGTTR	Os06g0129400|OsSPX-MFS3	-875	-870	agttCTGTTGcgtg	1
MYBCORE	D	CNGTTR	Os06g0129400|OsSPX-MFS3	-502	-497	tagcCAGTTAtaaa	1
MYBCORE	D	CNGTTR	Os06g0129400|OsSPX-MFS3	-361	-356	atagCTGTTGtatg	1
MYBCORE	R	CNGTTR	Os06g0129400|OsSPX-MFS3	-1730	-1725	accgCGGTTGttcg	1
MYBCORE	R	CNGTTR	Os06g0129400|OsSPX-MFS3	-883	-878	agaaCTGTTGaaca	1
MYBCORE	R	CNGTTR	Os06g0129400|OsSPX-MFS3	-148	-143	ggtaCGGTTGtgaa	1
MYBCOREATCYCB1	D	AACGG	Os06g0129400|OsSPX-MFS3	-2493	-2489	ccgaAACGGcata	1
MYBCOREATCYCB1	R	AACGG	Os06g0129400|OsSPX-MFS3	-2915	-2911	aattAACGGgcaa	1
MYBCOREATCYCB1	R	AACGG	Os06g0129400|OsSPX-MFS3	-2103	-2099	tatcAACGGtcga	1
MYBPLANT	D	MACCWAMC	Os06g0129400|OsSPX-MFS3	-645	-638	tgtcCACCAACCagca	1
MYBPLANT	R	MACCWAMC	Os06g0129400|OsSPX-MFS3	-1831	-1824	cgccAACCAACCtcac	1
MYBPLANT	R	MACCWAMC	Os06g0129400|OsSPX-MFS3	-1653	-1646	ggacCACCTACCctgt	1
MYBPZM	D	CCWACC	Os06g0129400|OsSPX-MFS3	-2183	-2178	agagCCTACCacga	1
MYBPZM	D	CCWACC	Os06g0129400|OsSPX-MFS3	-643	-638	tccaCCAACCagca	1
MYBPZM	D	CCWACC	Os06g0129400|OsSPX-MFS3	-284	-279	ggccCCAACCtagt	1
MYBPZM	R	CCWACC	Os06g0129400|OsSPX-MFS3	-1831	-1826	ccaaCCAACCtcac	1
MYBPZM	R	CCWACC	Os06g0129400|OsSPX-MFS3	-1653	-1648	accaCCTACCctgt	1
MYBPZM	R	CCWACC	Os06g0129400|OsSPX-MFS3	-1481	-1476	atcgCCAACCaacg	1
MYBST1	D	GGATA	Os06g0129400|OsSPX-MFS3	-1713	-1709	acagGGATAccta	1
MYBST1	D	GGATA	Os06g0129400|OsSPX-MFS3	-1299	-1295	attaGGATAagga	1
DRECRTCOREAT	R	RCCGAC	Os06g0129400|OsSPX-MFS3	-1247	-1242	tgaaGCCGACatca	1
DRECRTCOREAT	R	RCCGAC	Os06g0129400|OsSPX-MFS3	-214	-209	ggcaGCCGACcgat	1
START_END	DR	-	Os08g0141300|Os08g0141300	-3000	-1	-	0
NF-CO	D	CCACA	Os08g0141300|Os08g0141300	-510	-506	attaCCACAcgta	1
NF-CO	D	CCACA	Os08g0141300|Os08g0141300	-484	-480	ataaCCACAcaat	1
NF-CO	D	CCACA	Os08g0141300|Os08g0141300	-31	-27	accaCCACAataa	1
NF-CO	R	CCACA	Os08g0141300|Os08g0141300	-534	-530	gaaaCCACAacaa	1
NF-CO	R	CCACA	Os08g0141300|Os08g0141300	-99	-95	cccaCCACActcc	1
NF-CO	R	CCACA	Os08g0141300|Os08g0141300	-67	-63	ggccCCACAcccc	1
NF-Y	D	CCAAT	Os08g0141300|Os08g0141300	-1291	-1287	tcaaCCAATatcc	1
NF-Y	D	CCAAT	Os08g0141300|Os08g0141300	-917	-913	attaCCAATgaaa	1
NF-Y	R	CCAAT	Os08g0141300|Os08g0141300	-2401	-2397	acatCCAATgtga	1
NF-Y	R	CCAAT	Os08g0141300|Os08g0141300	-1949	-1945	gaatCCAATaatc	1
NF-Y	R	CCAAT	Os08g0141300|Os08g0141300	-1856	-1852	ccaaCCAATcaaa	1
NF-Y	R	CCAAT	Os08g0141300|Os08g0141300	-1800	-1796	actaCCAATtttg	1
NAP	D	TACGT	Os08g0141300|Os08g0141300	-2768	-2764	gactTACGTaaaa	1
NAP	D	TACGT	Os08g0141300|Os08g0141300	-1393	-1389	ttagTACGTgaca	1
NAP	R	TACGT	Os08g0141300|Os08g0141300	-2767	-2763	ttttTACGTaagt	1
NAP	R	TACGT	Os08g0141300|Os08g0141300	-506	-502	atatTACGTgtgg	1
ABRELATERD1	D	ACGTG	Os08g0141300|Os08g0141300	-2050	-2046	tccgACGTGcctc	1
ABRELATERD1	D	ACGTG	Os08g0141300|Os08g0141300	-1392	-1388	tagtACGTGacat	1
ABRELATERD1	R	ACGTG	Os08g0141300|Os08g0141300	-507	-503	tattACGTGtggt	1
ABRERATCAL	R	MACGYGB	Os08g0141300|Os08g0141300	-1152	-1146	tggaCACGCGCtttt	1
MYB1AT	D	WAACCA	Os08g0141300|Os08g0141300	-2352	-2347	aataAAACCAtcca	1
MYB1AT	D	WAACCA	Os08g0141300|Os08g0141300	-1813	-1808	gaagTAACCAaaac	1
MYB1AT	D	WAACCA	Os08g0141300|Os08g0141300	-1303	-1298	tgctTAACCAtttc	1
MYB1AT	D	WAACCA	Os08g0141300|Os08g0141300	-634	-629	tgacAAACCAgcaa	1
MYB1AT	D	WAACCA	Os08g0141300|Os08g0141300	-594	-589	catcAAACCAaacc	1
MYB1AT	D	WAACCA	Os08g0141300|Os08g0141300	-550	-545	gcggTAACCAtgag	1
MYB1AT	D	WAACCA	Os08g0141300|Os08g0141300	-487	-482	gtaaTAACCAcaca	1
MYB1AT	R	WAACCA	Os08g0141300|Os08g0141300	-1617	-1612	aatcTAACCAggtg	1
MYB1AT	R	WAACCA	Os08g0141300|Os08g0141300	-1370	-1365	taatTAACCAcctc	1
MYB1AT	R	WAACCA	Os08g0141300|Os08g0141300	-768	-763	ttatAAACCAtcat	1
MYB1AT	R	WAACCA	Os08g0141300|Os08g0141300	-532	-527	tttgAAACCAcaac	1
MYB2AT	D	TAACTG	Os08g0141300|Os08g0141300	-496	-491	tataTAACTGtaat	1
MYB2AT	R	TAACTG	Os08g0141300|Os08g0141300	-212	-207	tataTAACTGtaga	1
MYBCORE	D	CNGTTR	Os08g0141300|Os08g0141300	-1843	-1838	tccaCGGTTGataa	1
MYBCORE	D	CNGTTR	Os08g0141300|Os08g0141300	-1679	-1674	gctaCGGTTGataa	1
MYBCORE	D	CNGTTR	Os08g0141300|Os08g0141300	-212	-207	tctaCAGTTAtata	1
MYBCORE	R	CNGTTR	Os08g0141300|Os08g0141300	-2624	-2619	ttttCTGTTAgcat	1
MYBCORE	R	CNGTTR	Os08g0141300|Os08g0141300	-1197	-1192	gactCTGTTGactt	1
MYBCORE	R	CNGTTR	Os08g0141300|Os08g0141300	-1188	-1183	aaggCAGTTGactc	1
MYBCORE	R	CNGTTR	Os08g0141300|Os08g0141300	-683	-678	cctcCCGTTGtttt	1
MYBCORE	R	CNGTTR	Os08g0141300|Os08g0141300	-496	-491	attaCAGTTAtata	1
MYBCOREATCYCB1	D	AACGG	Os08g0141300|Os08g0141300	-682	-678	aaacAACGGgagg	1
MYBPLANT	D	MACCWAMC	Os08g0141300|Os08g0141300	-593	-586	atcaAACCAAACcttg	1
MYBPZM	D	CCWACC	Os08g0141300|Os08g0141300	-1056	-1051	caacCCTACCtagg	1
MYBPZM	R	CCWACC	Os08g0141300|Os08g0141300	-1853	-1848	tggaCCAACCaatc	1
MYBST1	D	GGATA	Os08g0141300|Os08g0141300	-2390	-2386	gtttGGATActaa	1
MYBST1	D	GGATA	Os08g0141300|Os08g0141300	-1358	-1354	taatGGATAatga	1
MYBST1	R	GGATA	Os08g0141300|Os08g0141300	-1287	-1283	tagtGGATAttgg	1
MYBST1	R	GGATA	Os08g0141300|Os08g0141300	-1211	-1207	aaaaGGATAtctc	1
MYBST1	R	GGATA	Os08g0141300|Os08g0141300	-1127	-1123	tgatGGATAtgta	1
MYBST1	R	GGATA	Os08g0141300|Os08g0141300	-402	-398	actaGGATAtatc	1
START_END	DR	-	Os08g0508800|Lox2:Os:1	-3000	-1	-	0
NF-CO	D	CCACA	Os08g0508800|Lox2:Os:1	-2469	-2465	ttgcCCACAttca	1
NF-CO	D	CCACA	Os08g0508800|Lox2:Os:1	-1411	-1407	gctaCCACAtcga	1
NF-Y	D	CCAAT	Os08g0508800|Lox2:Os:1	-2932	-2928	acgtCCAATgaac	1
NF-Y	D	CCAAT	Os08g0508800|Lox2:Os:1	-2223	-2219	aatcCCAATgtgc	1
NF-Y	D	CCAAT	Os08g0508800|Lox2:Os:1	-1865	-1861	cacgCCAATacgc	1
NF-Y	D	CCAAT	Os08g0508800|Lox2:Os:1	-1347	-1343	gcggCCAATtcaa	1
NF-Y	D	CCAAT	Os08g0508800|Lox2:Os:1	-744	-740	atgaCCAATatac	1
NF-Y	D	CCAAT	Os08g0508800|Lox2:Os:1	-128	-124	ttgcCCAATcgaa	1
NF-Y	R	CCAAT	Os08g0508800|Lox2:Os:1	-2695	-2691	cgatCCAATtaca	1
NF-Y	R	CCAAT	Os08g0508800|Lox2:Os:1	-2683	-2679	tcatCCAATctac	1
NF-Y	R	CCAAT	Os08g0508800|Lox2:Os:1	-1897	-1893	tctgCCAATattt	1
NF-Y	R	CCAAT	Os08g0508800|Lox2:Os:1	-1477	-1473	cggaCCAATagat	1
NAP	D	TACGT	Os08g0508800|Lox2:Os:1	-1492	-1488	gtcgTACGTatgt	1
NAP	D	TACGT	Os08g0508800|Lox2:Os:1	-1385	-1381	gataTACGTgtgc	1
NAP	D	TACGT	Os08g0508800|Lox2:Os:1	-862	-858	aatgTACGTatat	1
NAP	D	TACGT	Os08g0508800|Lox2:Os:1	-295	-291	ctacTACGTgcca	1
NAP	R	TACGT	Os08g0508800|Lox2:Os:1	-1835	-1831	taagTACGTgtta	1
NAP	R	TACGT	Os08g0508800|Lox2:Os:1	-1491	-1487	tacaTACGTacga	1
NAP	R	TACGT	Os08g0508800|Lox2:Os:1	-1360	-1356	cgcgTACGTcgcg	1
NAP	R	TACGT	Os08g0508800|Lox2:Os:1	-861	-857	tataTACGTacat	1
ABRELATERD1	D	ACGTG	Os08g0508800|Lox2:Os:1	-1384	-1380	atatACGTGtgca	1
ABRELATERD1	D	ACGTG	Os08g0508800|Lox2:Os:1	-1273	-1269	ataaACGTGcagt	1
ABRELATERD1	D	ACGTG	Os08g0508800|Lox2:Os:1	-294	-290	tactACGTGccaa	1
ABRELATERD1	R	ACGTG	Os08g0508800|Lox2:Os:1	-2937	-2933	ttggACGTGacta	1
ABRELATERD1	R	ACGTG	Os08g0508800|Lox2:Os:1	-2562	-2558	tacaACGTGaaag	1
ABRELATERD1	R	ACGTG	Os08g0508800|Lox2:Os:1	-1836	-1832	aagtACGTGttac	1
ABRERATCAL	D	MACGYGB	Os08g0508800|Lox2:Os:1	-1274	-1268	aataAACGTGCagtc	1
ABRERATCAL	R	MACGYGB	Os08g0508800|Lox2:Os:1	-1860	-1854	ttatAACGCGTattg	1
MYB1AT	D	WAACCA	Os08g0508800|Lox2:Os:1	-2963	-2958	gtacAAACCAgcta	1
MYB1AT	D	WAACCA	Os08g0508800|Lox2:Os:1	-2598	-2593	agacAAACCAgcta	1
MYB1AT	D	WAACCA	Os08g0508800|Lox2:Os:1	-1885	-1880	atagTAACCAactc	1
MYB1AT	D	WAACCA	Os08g0508800|Lox2:Os:1	-905	-900	ggacAAACCAaata	1
MYB1AT	D	WAACCA	Os08g0508800|Lox2:Os:1	-106	-101	attaAAACCAcgaa	1
MYB1AT	R	WAACCA	Os08g0508800|Lox2:Os:1	-1816	-1811	taatTAACCAcggg	1
MYB1AT	R	WAACCA	Os08g0508800|Lox2:Os:1	-709	-704	cattTAACCAaaat	1
MYB1AT	R	WAACCA	Os08g0508800|Lox2:Os:1	-381	-376	ttccAAACCAtgtg	1
MYBCORE	D	CNGTTR	Os08g0508800|Lox2:Os:1	-1744	-1739	aacgCCGTTGattt	1
MYBCORE	D	CNGTTR	Os08g0508800|Lox2:Os:1	-1215	-1210	tgccCTGTTGcaag	1
MYBCORE	R	CNGTTR	Os08g0508800|Lox2:Os:1	-2211	-2206	tttaCTGTTGgatg	1
MYBCORE	R	CNGTTR	Os08g0508800|Lox2:Os:1	-1721	-1716	taaaCGGTTAaata	1
MYBCORE	R	CNGTTR	Os08g0508800|Lox2:Os:1	-1575	-1570	aataCCGTTAactt	1
MYBCORE	R	CNGTTR	Os08g0508800|Lox2:Os:1	-824	-819	taaaCTGTTAgaaa	1
MYBCOREATCYCB1	D	AACGG	Os08g0508800|Lox2:Os:1	-2375	-2371	atgaAACGGagga	1
MYBCOREATCYCB1	D	AACGG	Os08g0508800|Lox2:Os:1	-1600	-1596	aacaAACGGtcag	1
MYBCOREATCYCB1	D	AACGG	Os08g0508800|Lox2:Os:1	-1574	-1570	agttAACGGtatt	1
MYBCOREATCYCB1	D	AACGG	Os08g0508800|Lox2:Os:1	-511	-507	gccgAACGGtttc	1
MYBCOREATCYCB1	R	AACGG	Os08g0508800|Lox2:Os:1	-2501	-2497	atgaAACGGagag	1
MYBCOREATCYCB1	R	AACGG	Os08g0508800|Lox2:Os:1	-1744	-1740	aatcAACGGcgtt	1
MYBCOREATCYCB1	R	AACGG	Os08g0508800|Lox2:Os:1	-1718	-1714	gataAACGGttaa	1
MYBPLANT	D	MACCWAMC	Os08g0508800|Lox2:Os:1	-1428	-1421	gatgAACCAACCctct	1
MYBPZM	D	CCWACC	Os08g0508800|Lox2:Os:1	-1426	-1421	tgaaCCAACCctct	1
MYBPZM	D	CCWACC	Os08g0508800|Lox2:Os:1	-18	-13	ggccCCAACCatag	1
MYBST1	D	GGATA	Os08g0508800|Lox2:Os:1	-2639	-2635	aggtGGATAgggt	1
MYBST1	D	GGATA	Os08g0508800|Lox2:Os:1	-1390	-1386	gtatGGATAtacg	1
MYBST1	D	GGATA	Os08g0508800|Lox2:Os:1	-1227	-1223	ggctGGATAttat	1
MYBST1	D	GGATA	Os08g0508800|Lox2:Os:1	-617	-613	tatgGGATAgagt	1
MYBST1	R	GGATA	Os08g0508800|Lox2:Os:1	-1785	-1781	gttaGGATAacgc	1
MYBST1	R	GGATA	Os08g0508800|Lox2:Os:1	-1143	-1139	agatGGATAgtca	1
MYBST1	R	GGATA	Os08g0508800|Lox2:Os:1	-313	-309	atatGGATAtaga	1
START_END	DR	-	Os09g0438100|Os09g0438100	-3000	-1	-	0
NF-CO	D	CCACA	Os09g0438100|Os09g0438100	-2329	-2325	gctcCCACAcagg	1
NF-CO	D	CCACA	Os09g0438100|Os09g0438100	-1220	-1216	taacCCACAttta	1
NF-CO	D	CCACA	Os09g0438100|Os09g0438100	-870	-866	actgCCACAcatc	1
NF-CO	D	CCACA	Os09g0438100|Os09g0438100	-810	-806	tagcCCACAgaaa	1
NF-CO	R	CCACA	Os09g0438100|Os09g0438100	-1568	-1564	aggcCCACAatgg	1
NF-Y	D	CCAAT	Os09g0438100|Os09g0438100	-2892	-2888	ctcaCCAATggct	1
NF-Y	D	CCAAT	Os09g0438100|Os09g0438100	-2067	-2063	attcCCAATgtat	1
NF-Y	D	CCAAT	Os09g0438100|Os09g0438100	-617	-613	atccCCAATgatg	1
NF-Y	R	CCAAT	Os09g0438100|Os09g0438100	-2752	-2748	attaCCAATatgc	1
NF-Y	R	CCAAT	Os09g0438100|Os09g0438100	-2745	-2741	taacCCAATtacc	1
NF-Y	R	CCAAT	Os09g0438100|Os09g0438100	-2047	-2043	tttaCCAATatgc	1
NF-Y	R	CCAAT	Os09g0438100|Os09g0438100	-1558	-1554	aggcCCAATaagg	1
NAP	D	TACGT	Os09g0438100|Os09g0438100	-2997	-2993	gcaTACGTaccc	1
NAP	D	TACGT	Os09g0438100|Os09g0438100	-1906	-1902	cgcaTACGTatat	1
NAP	R	TACGT	Os09g0438100|Os09g0438100	-2996	-2992	ggggTACGTatgc	1
NAP	R	TACGT	Os09g0438100|Os09g0438100	-2771	-2767	gggcTACGTctca	1
NAP	R	TACGT	Os09g0438100|Os09g0438100	-2228	-2224	taatTACGTcgta	1
NAP	R	TACGT	Os09g0438100|Os09g0438100	-2176	-2172	taaaTACGTcata	1
NAP	R	TACGT	Os09g0438100|Os09g0438100	-1905	-1901	gataTACGTatgc	1
NAP	R	TACGT	Os09g0438100|Os09g0438100	-922	-918	tggtTACGTtgtt	1
NACR	D	CACGCA	Os09g0438100|Os09g0438100	-23	-18	aacaCACGCAcaca	1
NACR	R	CACGCA	Os09g0438100|Os09g0438100	-2840	-2835	cagcCACGCAttga	1
NACR	R	CACGCA	Os09g0438100|Os09g0438100	-59	-54	agtgCACGCAttga	1
ABRELATERD1	D	ACGTG	Os09g0438100|Os09g0438100	-756	-752	atccACGTGtcct	1
ABRELATERD1	R	ACGTG	Os09g0438100|Os09g0438100	-757	-753	ggacACGTGgatg	1
ABRERATCAL	D	MACGYGB	Os09g0438100|Os09g0438100	-757	-751	catcCACGTGTcctc	1
ABRERATCAL	R	MACGYGB	Os09g0438100|Os09g0438100	-758	-752	aggaCACGTGGatgg	1
MYB1AT	D	WAACCA	Os09g0438100|Os09g0438100	-1957	-1952	acggTAACCAcggt	1
MYB1AT	D	WAACCA	Os09g0438100|Os09g0438100	-919	-914	aacgTAACCAaact	1
MYB1AT	D	WAACCA	Os09g0438100|Os09g0438100	-433	-428	aagaAAACCAgtgg	1
MYB1AT	R	WAACCA	Os09g0438100|Os09g0438100	-2116	-2111	gctaAAACCAtgca	1
MYB1AT	R	WAACCA	Os09g0438100|Os09g0438100	-264	-259	gataAAACCAaaaa	1
MYBCORE	D	CNGTTR	Os09g0438100|Os09g0438100	-2585	-2580	tcacCTGTTAggtc	1
MYBCORE	D	CNGTTR	Os09g0438100|Os09g0438100	-1939	-1934	tggaCGGTTAccac	1
MYBCORE	D	CNGTTR	Os09g0438100|Os09g0438100	-1853	-1848	cgcaCGGTTAccgc	1
MYBCORE	D	CNGTTR	Os09g0438100|Os09g0438100	-1785	-1780	caggCGGTTAccgt	1
MYBCORE	D	CNGTTR	Os09g0438100|Os09g0438100	-1764	-1759	cgcgCGGTTAccgc	1
MYBCORE	D	CNGTTR	Os09g0438100|Os09g0438100	-1287	-1282	accgCGGTTAccgc	1
MYBCORE	D	CNGTTR	Os09g0438100|Os09g0438100	-1276	-1271	cgcgCGGTTAccgg	1
MYBCORE	D	CNGTTR	Os09g0438100|Os09g0438100	-1031	-1026	atgaCTGTTGcatg	1
MYBCORE	D	CNGTTR	Os09g0438100|Os09g0438100	-582	-577	tgccCTGTTAcggt	1
MYBCORE	D	CNGTTR	Os09g0438100|Os09g0438100	-576	-571	gttaCGGTTGacag	1
MYBCORE	D	CNGTTR	Os09g0438100|Os09g0438100	-225	-220	atggCCGTTGctta	1
MYBCORE	R	CNGTTR	Os09g0438100|Os09g0438100	-1871	-1866	tgtaCGGTTAtcgt	1
MYBCORE	R	CNGTTR	Os09g0438100|Os09g0438100	-1840	-1835	cgcgCGGTTAggag	1
MYBCORE	R	CNGTTR	Os09g0438100|Os09g0438100	-1293	-1288	accgCGGTTAccgg	1
MYBCOREATCYCB1	D	AACGG	Os09g0438100|Os09g0438100	-2971	-2967	cccgAACGGcgct	1
MYBCOREATCYCB1	D	AACGG	Os09g0438100|Os09g0438100	-1819	-1815	tcaaAACGGaggg	1
MYBCOREATCYCB1	D	AACGG	Os09g0438100|Os09g0438100	-1626	-1622	gaaaAACGGtggg	1
MYBCOREATCYCB1	D	AACGG	Os09g0438100|Os09g0438100	-1172	-1168	ctaaAACGGcaag	1
MYBCOREATCYCB1	D	AACGG	Os09g0438100|Os09g0438100	-675	-671	gagaAACGGtatc	1
MYBCOREATCYCB1	R	AACGG	Os09g0438100|Os09g0438100	-225	-221	aagcAACGGccat	1
MYBPLANT	D	MACCWAMC	Os09g0438100|Os09g0438100	-918	-911	acgtAACCAAACtcct	1
MYBPZM	D	CCWACC	Os09g0438100|Os09g0438100	-1336	-1331	aaacCCTACCgccg	1
MYBPZM	R	CCWACC	Os09g0438100|Os09g0438100	-1950	-1945	ccacCCTACCgtgg	1
MYBST1	D	GGATA	Os09g0438100|Os09g0438100	-2348	-2344	ggtgGGATAttct	1
MYBST1	D	GGATA	Os09g0438100|Os09g0438100	-837	-833	ggatGGATAcata	1
MYBST1	D	GGATA	Os09g0438100|Os09g0438100	-489	-485	taagGGATAgctt	1
MYBST1	R	GGATA	Os09g0438100|Os09g0438100	-2506	-2502	gacaGGATAaaag	1
DRECRTCOREAT	D	RCCGAC	Os09g0438100|Os09g0438100	-1879	-1874	cgaaGCCGACgata	1
DRECRTCOREAT	D	RCCGAC	Os09g0438100|Os09g0438100	-1317	-1312	cgttACCGACcctc	1
DRECRTCOREAT	R	RCCGAC	Os09g0438100|Os09g0438100	-2596	-2591	tgatGCCGACgagg	1
START_END	DR	-	Os09g0532000|SGR	-3000	-1	-	0
NF-CO	D	CCACA	Os09g0532000|SGR	-2831	-2827	aagcCCACAcgcc	1
NF-CO	D	CCACA	Os09g0532000|SGR	-2086	-2082	accaCCACAgcaa	1
NF-CO	D	CCACA	Os09g0532000|SGR	-1911	-1907	gggcCCACActgt	1
NF-CO	D	CCACA	Os09g0532000|SGR	-245	-241	aacgCCACAattt	1
NF-CO	R	CCACA	Os09g0532000|SGR	-1557	-1553	aacgCCACAatgt	1
NF-CO	R	CCACA	Os09g0532000|SGR	-1243	-1239	gttcCCACAgccc	1
NF-CO	R	CCACA	Os09g0532000|SGR	-517	-513	cgtaCCACAcacc	1
NF-Y	D	CCAAT	Os09g0532000|SGR	-2404	-2400	tccaCCAATccct	1
NF-Y	D	CCAAT	Os09g0532000|SGR	-699	-695	aatcCCAATtaag	1
NF-Y	D	CCAAT	Os09g0532000|SGR	-620	-616	cgggCCAATatta	1
NF-Y	R	CCAAT	Os09g0532000|SGR	-1475	-1471	ggacCCAATctta	1
NF-Y	R	CCAAT	Os09g0532000|SGR	-476	-472	acttCCAATttcg	1
NAP	D	TACGT	Os09g0532000|SGR	-2486	-2482	tgcaTACGTggcc	1
NAP	D	TACGT	Os09g0532000|SGR	-721	-717	aacgTACGTaacg	1
NAP	D	TACGT	Os09g0532000|SGR	-512	-508	gtggTACGTatac	1
NAP	D	TACGT	Os09g0532000|SGR	-506	-502	cgtaTACGTatat	1
NAP	D	TACGT	Os09g0532000|SGR	-421	-417	tataTACGTagga	1
NAP	R	TACGT	Os09g0532000|SGR	-2963	-2959	ggtaTACGTgctc	1
NAP	R	TACGT	Os09g0532000|SGR	-1871	-1867	gtacTACGTggca	1
NAP	R	TACGT	Os09g0532000|SGR	-724	-720	tacgTACGTtgca	1
NAP	R	TACGT	Os09g0532000|SGR	-511	-507	cgtaTACGTacca	1
NAP	R	TACGT	Os09g0532000|SGR	-505	-501	tataTACGTatac	1
NAP	R	TACGT	Os09g0532000|SGR	-420	-416	ttccTACGTatat	1
NACR	D	CACGCA	Os09g0532000|SGR	-1037	-1032	ctcgCACGCAtcgc	1
ABRELATERD1	D	ACGTG	Os09g0532000|SGR	-2945	-2941	cgaaACGTGgatc	1
ABRELATERD1	D	ACGTG	Os09g0532000|SGR	-2485	-2481	gcatACGTGgccg	1
ABRELATERD1	D	ACGTG	Os09g0532000|SGR	-2473	-2469	gccaACGTGacat	1
ABRELATERD1	D	ACGTG	Os09g0532000|SGR	-1251	-1247	ggtcACGTGggct	1
ABRELATERD1	D	ACGTG	Os09g0532000|SGR	-1151	-1147	ccaaACGTGacga	1
ABRELATERD1	D	ACGTG	Os09g0532000|SGR	-449	-445	aacgACGTGacaa	1
ABRELATERD1	D	ACGTG	Os09g0532000|SGR	-299	-295	cgccACGTGcagc	1
ABRELATERD1	R	ACGTG	Os09g0532000|SGR	-2964	-2960	gtatACGTGctcg	1
ABRELATERD1	R	ACGTG	Os09g0532000|SGR	-2814	-2810	ggcgACGTGgatg	1
ABRELATERD1	R	ACGTG	Os09g0532000|SGR	-1872	-1868	tactACGTGgcag	1
ABRELATERD1	R	ACGTG	Os09g0532000|SGR	-1516	-1512	cccaACGTGaatc	1
ABRELATERD1	R	ACGTG	Os09g0532000|SGR	-1252	-1248	gcccACGTGacca	1
ABRELATERD1	R	ACGTG	Os09g0532000|SGR	-300	-296	ctgcACGTGgcgt	1
ABRERATCAL	D	MACGYGB	Os09g0532000|SGR	-2946	-2940	gcgaAACGTGGatcg	1
ABRERATCAL	D	MACGYGB	Os09g0532000|SGR	-1252	-1246	tggtCACGTGGgctg	1
ABRERATCAL	D	MACGYGB	Os09g0532000|SGR	-300	-294	acgcCACGTGCagca	1
ABRERATCAL	D	MACGYGB	Os09g0532000|SGR	-257	-251	caccCACGCGCgaac	1
ABRERATCAL	D	MACGYGB	Os09g0532000|SGR	-92	-86	gcacCACGCGTgcac	1
ABRERATCAL	R	MACGYGB	Os09g0532000|SGR	-301	-295	gctgCACGTGGcgtc	1
ABRERATCAL	R	MACGYGB	Os09g0532000|SGR	-91	-85	tgtgCACGCGTggtg	1
ABREATCONSENSUS	D	YACGTGGC	Os09g0532000|SGR	-2486	-2479	tgcaTACGTGGCcgcc	1
ABREATCONSENSUS	R	YACGTGGC	Os09g0532000|SGR	-1874	-1867	gtacTACGTGGCagtc	1
ABREATCONSENSUS	R	YACGTGGC	Os09g0532000|SGR	-302	-295	gctgCACGTGGCgtct	1
MYB1AT	D	WAACCA	Os09g0532000|SGR	-2576	-2571	tcgaAAACCAgaca	1
MYB1AT	D	WAACCA	Os09g0532000|SGR	-2276	-2271	gcacAAACCAtcac	1
MYB1AT	D	WAACCA	Os09g0532000|SGR	-1860	-1855	actgAAACCAcccc	1
MYB1AT	D	WAACCA	Os09g0532000|SGR	-1215	-1210	atgaTAACCAcgag	1
MYB1AT	D	WAACCA	Os09g0532000|SGR	-660	-655	gtcaAAACCAaatg	1
MYB1AT	D	WAACCA	Os09g0532000|SGR	-326	-321	catcAAACCAcgct	1
MYB1AT	R	WAACCA	Os09g0532000|SGR	-2508	-2503	tcaaAAACCAtcca	1
MYB1AT	R	WAACCA	Os09g0532000|SGR	-466	-461	atttTAACCAaact	1
MYB2AT	D	TAACTG	Os09g0532000|SGR	-1536	-1531	gttaTAACTGcagt	1
MYB2AT	R	TAACTG	Os09g0532000|SGR	-1542	-1537	gttaTAACTGtttc	1
MYB2AT	R	TAACTG	Os09g0532000|SGR	-1130	-1125	ggtcTAACTGaaga	1
MYBCORE	D	CNGTTR	Os09g0532000|SGR	-1542	-1537	gaaaCAGTTAtaac	1
MYBCORE	D	CNGTTR	Os09g0532000|SGR	-1130	-1125	tcttCAGTTAgacc	1
MYBCORE	R	CNGTTR	Os09g0532000|SGR	-1740	-1735	tccaCGGTTAcgaa	1
MYBCORE	R	CNGTTR	Os09g0532000|SGR	-1536	-1531	actgCAGTTAtaac	1
MYBCORE	R	CNGTTR	Os09g0532000|SGR	-948	-943	ggcgCTGTTGcttg	1
MYBCORE	R	CNGTTR	Os09g0532000|SGR	-349	-344	cattCGGTTAcggc	1
MYBCORE	R	CNGTTR	Os09g0532000|SGR	-136	-131	gtcgCGGTTGtgtg	1
MYBCOREATCYCB1	D	AACGG	Os09g0532000|SGR	-1296	-1292	aagaAACGGatcg	1
MYBCOREATCYCB1	D	AACGG	Os09g0532000|SGR	-1237	-1233	tgggAACGGgtga	1
MYBCOREATCYCB1	R	AACGG	Os09g0532000|SGR	-554	-550	ttgaAACGGgcta	1
MYBCOREATCYCB1	R	AACGG	Os09g0532000|SGR	-268	-264	tggaAACGGgagg	1
MYBCOREATCYCB1	R	AACGG	Os09g0532000|SGR	-233	-229	ggaaAACGGggga	1
MYBPLANT	D	MACCWAMC	Os09g0532000|SGR	-28	-21	taatCACCAACCtgca	1
MYBPLANT	R	MACCWAMC	Os09g0532000|SGR	-469	-462	ttttAACCAAACttcc	1
MYBPZM	D	CCWACC	Os09g0532000|SGR	-26	-21	atcaCCAACCtgca	1
MYBST1	R	GGATA	Os09g0532000|SGR	-2593	-2589	agggGGATAattc	1
MYBST1	R	GGATA	Os09g0532000|SGR	-609	-605	agcaGGATActta	1
DRECRTCOREAT	D	RCCGAC	Os09g0532000|SGR	-2317	-2312	ggtgGCCGACggcg	1
START_END	DR	-	Os11g0145200|OsUGT75E1	-3000	-1	-	0
NF-CO	D	CCACA	Os11g0145200|OsUGT75E1	-2857	-2853	ccggCCACAtacc	1
NF-CO	R	CCACA	Os11g0145200|OsUGT75E1	-2611	-2607	agtgCCACActaa	1
NF-CO	R	CCACA	Os11g0145200|OsUGT75E1	-2540	-2536	acctCCACAagcc	1
NF-CO	R	CCACA	Os11g0145200|OsUGT75E1	-2504	-2500	tcctCCACAatct	1
NF-CO	R	CCACA	Os11g0145200|OsUGT75E1	-1553	-1549	agcaCCACAttgt	1
NF-Y	D	CCAAT	Os11g0145200|OsUGT75E1	-2913	-2909	caagCCAATgggg	1
NF-Y	D	CCAAT	Os11g0145200|OsUGT75E1	-2737	-2733	gcacCCAATtcaa	1
NF-Y	D	CCAAT	Os11g0145200|OsUGT75E1	-801	-797	ttcaCCAATtaaa	1
NF-Y	D	CCAAT	Os11g0145200|OsUGT75E1	-478	-474	aaaaCCAATtata	1
NF-Y	R	CCAAT	Os11g0145200|OsUGT75E1	-784	-780	caatCCAATcagg	1
NF-Y	R	CCAAT	Os11g0145200|OsUGT75E1	-98	-94	gttgCCAATggtt	1
NF-Y	R	CCAAT	Os11g0145200|OsUGT75E1	-59	-55	gttgCCAATggtt	1
NF-YB	D	CCACATA	Os11g0145200|OsUGT75E1	-2857	-2851	ccggCCACATAcctc	1
NAP	D	TACGT	Os11g0145200|OsUGT75E1	-306	-302	cataTACGTcagt	1
ABRELATERD1	D	ACGTG	Os11g0145200|OsUGT75E1	-319	-315	tagaACGTGagta	1
ABRELATERD1	R	ACGTG	Os11g0145200|OsUGT75E1	-2039	-2035	gcagACGTGtttg	1
ABRERATCAL	D	MACGYGB	Os11g0145200|OsUGT75E1	-1173	-1167	gatgCACGCGGttcc	1
ABRERATCAL	R	MACGYGB	Os11g0145200|OsUGT75E1	-125	-119	gaagCACGCGCatat	1
ABRERATCAL	R	MACGYGB	Os11g0145200|OsUGT75E1	-78	-72	gaagCACGCGCatat	1
MYB1AT	D	WAACCA	Os11g0145200|OsUGT75E1	-481	-476	aaaaAAACCAatta	1
MYB1AT	D	WAACCA	Os11g0145200|OsUGT75E1	-103	-98	taatTAACCAttgg	1
MYB1AT	D	WAACCA	Os11g0145200|OsUGT75E1	-87	-82	actaAAACCAtatg	1
MYB1AT	D	WAACCA	Os11g0145200|OsUGT75E1	-64	-59	cctaAAACCAttgg	1
MYB1AT	R	WAACCA	Os11g0145200|OsUGT75E1	-1492	-1487	tagtAAACCAcgag	1
MYB1AT	R	WAACCA	Os11g0145200|OsUGT75E1	-1318	-1313	cgggTAACCAtagg	1
MYB2AT	R	TAACTG	Os11g0145200|OsUGT75E1	-363	-358	aataTAACTGtttt	1
MYBCORE	D	CNGTTR	Os11g0145200|OsUGT75E1	-3000	-2995	CCGTTAcaga	1
MYBCORE	D	CNGTTR	Os11g0145200|OsUGT75E1	-2885	-2880	acaaCGGTTGcaga	1
MYBCORE	D	CNGTTR	Os11g0145200|OsUGT75E1	-1296	-1291	aatgCTGTTAacga	1
MYBCORE	D	CNGTTR	Os11g0145200|OsUGT75E1	-842	-837	catcCGGTTAaacg	1
MYBCORE	D	CNGTTR	Os11g0145200|OsUGT75E1	-363	-358	aaaaCAGTTAtatt	1
MYBCORE	R	CNGTTR	Os11g0145200|OsUGT75E1	-2888	-2883	gcaaCCGTTGtagc	1
MYBCORE	R	CNGTTR	Os11g0145200|OsUGT75E1	-2805	-2800	ctagCCGTTGgggg	1
MYBCORE	R	CNGTTR	Os11g0145200|OsUGT75E1	-2360	-2355	cagaCAGTTGtagt	1
MYBCORE	R	CNGTTR	Os11g0145200|OsUGT75E1	-2107	-2102	ttctCTGTTAagac	1
MYBCORE	R	CNGTTR	Os11g0145200|OsUGT75E1	-1795	-1790	tcgaCCGTTAattt	1
MYBCORE	R	CNGTTR	Os11g0145200|OsUGT75E1	-1484	-1479	gaatCCGTTAgtaa	1
MYBCORE	R	CNGTTR	Os11g0145200|OsUGT75E1	-717	-712	cttgCAGTTGcaaa	1
MYBCORE	R	CNGTTR	Os11g0145200|OsUGT75E1	-224	-219	ttgtCAGTTGtctg	1
MYBCORE	R	CNGTTR	Os11g0145200|OsUGT75E1	-186	-181	tcacCTGTTGttgt	1
MYBCOREATCYCB1	D	AACGG	Os11g0145200|OsUGT75E1	-2887	-2883	ctacAACGGttgc	1
MYBCOREATCYCB1	D	AACGG	Os11g0145200|OsUGT75E1	-2804	-2800	ccccAACGGctag	1
MYBCOREATCYCB1	D	AACGG	Os11g0145200|OsUGT75E1	-1794	-1790	aattAACGGtcga	1
MYBCOREATCYCB1	D	AACGG	Os11g0145200|OsUGT75E1	-1483	-1479	tactAACGGattc	1
MYBCOREATCYCB1	D	AACGG	Os11g0145200|OsUGT75E1	-794	-790	attaAACGGgcct	1
MYBCOREATCYCB1	D	AACGG	Os11g0145200|OsUGT75E1	-349	-345	ttagAACGGatgg	1
MYBCOREATCYCB1	R	AACGG	Os11g0145200|OsUGT75E1	-3000	-2996	ctgtAACGG	1
MYBPLANT	R	MACCWAMC	Os11g0145200|OsUGT75E1	-2791	-2784	ctccCACCAACCaaaa	1
MYBPZM	R	CCWACC	Os11g0145200|OsUGT75E1	-2791	-2786	cccaCCAACCaaaa	1
MYBST1	D	GGATA	Os11g0145200|OsUGT75E1	-1151	-1147	tgccGGATAaaaa	1
MYBST1	R	GGATA	Os11g0145200|OsUGT75E1	-1840	-1836	ttagGGATAattt	1
MYBST1	R	GGATA	Os11g0145200|OsUGT75E1	-621	-617	gctgGGATAcatg	1
MYBST1	R	GGATA	Os11g0145200|OsUGT75E1	-448	-444	ttaaGGATAaatc	1
DRECRTCOREAT	D	RCCGAC	Os11g0145200|OsUGT75E1	-2990	-2985	cagaGCCGACggag	1
DRECRTCOREAT	R	RCCGAC	Os11g0145200|OsUGT75E1	-2932	-2927	tcagACCGACgttg	1
START_END	DR	-	Os03g0700700|OsLOX1	-3000	-1	-	0
NF-CO	D	CCACA	Os03g0700700|OsLOX1	-2681	-2677	aaggCCACAgggc	1
NF-CO	D	CCACA	Os03g0700700|OsLOX1	-2673	-2669	agggCCACAtgat	1
NF-CO	D	CCACA	Os03g0700700|OsLOX1	-2146	-2142	gcagCCACAacaa	1
NF-CO	D	CCACA	Os03g0700700|OsLOX1	-2076	-2072	tataCCACAttac	1
NF-CO	D	CCACA	Os03g0700700|OsLOX1	-1608	-1604	gtagCCACAcctg	1
NF-CO	D	CCACA	Os03g0700700|OsLOX1	-785	-781	gtgtCCACAgcgc	1
NF-CO	D	CCACA	Os03g0700700|OsLOX1	-410	-406	tgtgCCACAgccc	1
NF-CO	R	CCACA	Os03g0700700|OsLOX1	-1639	-1635	cccaCCACAaagg	1
NF-CO	R	CCACA	Os03g0700700|OsLOX1	-1080	-1076	cgagCCACAgcta	1
NF-Y	D	CCAAT	Os03g0700700|OsLOX1	-2745	-2741	ccatCCAATgagg	1
NF-Y	R	CCAAT	Os03g0700700|OsLOX1	-1719	-1715	tcggCCAATgtat	1
NAP	D	TACGT	Os03g0700700|OsLOX1	-2704	-2700	gcagTACGTcaac	1
NAP	D	TACGT	Os03g0700700|OsLOX1	-1786	-1782	tgagTACGTaacg	1
NAP	D	TACGT	Os03g0700700|OsLOX1	-1492	-1488	cctgTACGTaatc	1
NAP	R	TACGT	Os03g0700700|OsLOX1	-1785	-1781	acgtTACGTactc	1
NAP	R	TACGT	Os03g0700700|OsLOX1	-1780	-1776	gattTACGTtacg	1
NAP	R	TACGT	Os03g0700700|OsLOX1	-1614	-1610	tggcTACGTgccg	1
NAP	R	TACGT	Os03g0700700|OsLOX1	-1491	-1487	ggatTACGTacag	1
NAP	R	TACGT	Os03g0700700|OsLOX1	-1413	-1409	aagcTACGTgcat	1
NACR	D	CACGCA	Os03g0700700|OsLOX1	-592	-587	atcaCACGCAcaca	1
ABRELATERD1	D	ACGTG	Os03g0700700|OsLOX1	-2605	-2601	tggcACGTGcttt	1
ABRELATERD1	D	ACGTG	Os03g0700700|OsLOX1	-1599	-1595	cctgACGTGcacc	1
ABRELATERD1	R	ACGTG	Os03g0700700|OsLOX1	-2606	-2602	aagcACGTGccat	1
ABRELATERD1	R	ACGTG	Os03g0700700|OsLOX1	-2404	-2400	attaACGTGctca	1
ABRELATERD1	R	ACGTG	Os03g0700700|OsLOX1	-1615	-1611	ggctACGTGccga	1
ABRELATERD1	R	ACGTG	Os03g0700700|OsLOX1	-1414	-1410	agctACGTGcatg	1
ABRERATCAL	D	MACGYGB	Os03g0700700|OsLOX1	-2606	-2600	atggCACGTGCtttt	1
ABRERATCAL	R	MACGYGB	Os03g0700700|OsLOX1	-2607	-2601	aaagCACGTGCcatc	1
ABRERATCAL	R	MACGYGB	Os03g0700700|OsLOX1	-2405	-2399	gattAACGTGCtcac	1
ABRERATCAL	R	MACGYGB	Os03g0700700|OsLOX1	-1579	-1573	ctctCACGCGCacaa	1
MYB1AT	D	WAACCA	Os03g0700700|OsLOX1	-724	-719	gaatTAACCAgctg	1
MYB1AT	R	WAACCA	Os03g0700700|OsLOX1	-2727	-2722	atccAAACCAtagc	1
MYB1AT	R	WAACCA	Os03g0700700|OsLOX1	-1990	-1985	tataAAACCActtt	1
MYB1AT	R	WAACCA	Os03g0700700|OsLOX1	-505	-500	aaccAAACCAtgga	1
MYB2AT	D	TAACTG	Os03g0700700|OsLOX1	-1266	-1261	tattTAACTGttcg	1
MYBCORE	D	CNGTTR	Os03g0700700|OsLOX1	-1592	-1587	tgcaCCGTTAattt	1
MYBCORE	D	CNGTTR	Os03g0700700|OsLOX1	-1320	-1315	atgaCGGTTActcc	1
MYBCORE	R	CNGTTR	Os03g0700700|OsLOX1	-2653	-2648	tcacCTGTTGagaa	1
MYBCORE	R	CNGTTR	Os03g0700700|OsLOX1	-2468	-2463	gtttCTGTTAgcac	1
MYBCORE	R	CNGTTR	Os03g0700700|OsLOX1	-1802	-1797	ttgcCGGTTGagct	1
MYBCORE	R	CNGTTR	Os03g0700700|OsLOX1	-1266	-1261	cgaaCAGTTAaata	1
MYBCOREATCYCB1	R	AACGG	Os03g0700700|OsLOX1	-1592	-1588	aattAACGGtgca	1
MYBPLANT	D	MACCWAMC	Os03g0700700|OsLOX1	-931	-924	aaacAACCAAACaata	1
MYBPLANT	R	MACCWAMC	Os03g0700700|OsLOX1	-503	-496	gtggAACCAAACcatg	1
MYBST1	D	GGATA	Os03g0700700|OsLOX1	-2983	-2979	ttttGGATAataa	1
MYBST1	D	GGATA	Os03g0700700|OsLOX1	-1126	-1122	cgttGGATAcgga	1
MYBST1	D	GGATA	Os03g0700700|OsLOX1	-744	-740	catcGGATAtttg	1
MYBST1	R	GGATA	Os03g0700700|OsLOX1	-607	-603	ataaGGATAaatg	1
MYBST1	R	GGATA	Os03g0700700|OsLOX1	-601	-597	tgatGGATAagga	1
DRECRTCOREAT	D	RCCGAC	Os03g0700700|OsLOX1	-434	-429	gaccGCCGACcggt	1
DRECRTCOREAT	R	RCCGAC	Os03g0700700|OsLOX1	-1461	-1456	tcggACCGACcgat	1
START_END	DR	-	Os05g0453300|Os05g0453300	-3000	-1	-	0
NF-CO	D	CCACA	Os05g0453300|Os05g0453300	-1595	-1591	tcggCCACAgcgg	1
NF-CO	D	CCACA	Os05g0453300|Os05g0453300	-1092	-1088	cccgCCACAcgaa	1
NF-CO	D	CCACA	Os05g0453300|Os05g0453300	-830	-826	gacaCCACAcaca	1
NF-CO	D	CCACA	Os05g0453300|Os05g0453300	-310	-306	cgtaCCACAacta	1
NF-CO	R	CCACA	Os05g0453300|Os05g0453300	-2650	-2646	acacCCACAatgg	1
NF-CO	R	CCACA	Os05g0453300|Os05g0453300	-2260	-2256	ggtcCCACAttta	1
NF-CO	R	CCACA	Os05g0453300|Os05g0453300	-2204	-2200	agacCCACAaaac	1
NF-CO	R	CCACA	Os05g0453300|Os05g0453300	-1362	-1358	gggcCCACAtgtc	1
NF-Y	D	CCAAT	Os05g0453300|Os05g0453300	-2533	-2529	tcacCCAATcggg	1
NF-Y	R	CCAAT	Os05g0453300|Os05g0453300	-1789	-1785	gtgtCCAATgaaa	1
NF-Y	R	CCAAT	Os05g0453300|Os05g0453300	-589	-585	gtgcCCAATcacg	1
NAP	D	TACGT	Os05g0453300|Os05g0453300	-850	-846	ctgcTACGTgaca	1
[truncated: 1,760 more rows]

## Sheet: RSAT_score
Rank	Gene ID	Gene symbol	seq	NF-CO	NF-Y	NF-YB	NAP	NACR	ABRELATERD1	ABRERATCAL	ABREATCONSENSUS	MYB1AT	MYB2AT	MYBCORE	MYBCOREATCYCB1	MYBPLANT	MYBPZM	MYBST1	DRECRTCOREAT
1	Os09g0532000	SGR	Os09g0532000|SGR	7	5	0	11	1	13	7	3	8	3	7	5	2	1	2	1
2	Os02g0626400	OsPAL	Os02g0626400|OsPAL	11	8	0	7	2	3	4	0	2	2	10	4	6	9	2	3
3	Os10g0516100	OsGDCH	Os10g0516100|OsGDCH	4	9	2	0	1	3	1	0	4	6	19	3	5	5	8	2
4	Os08g0104600	Fd1	Os08g0104600|Fd1	8	10	0	8	1	10	7	3	9	1	4	0	1	3	4	1
5	Os05g0535900	Os05g0535900	Os05g0535900|Os05g0535900	13	7	0	6	1	6	2	0	1	2	10	8	1	3	6	3
6	Os04g0414700	Os04g0414700	Os04g0414700|Os04g0414700	15	6	4	1	0	11	4	0	1	1	6	3	0	3	8	4
7	Os02g0744000	Os02g0744000	Os02g0744000|Os02g0744000	3	8	0	6	2	11	6	0	1	3	8	5	3	4	6	1
8	Os10g0502400	HEMA1	Os10g0502400|HEMA1	10	9	0	3	3	7	3	0	6	2	9	3	2	3	3	2
9	Os04g0459500	Os04g0459500	Os04g0459500|Os04g0459500	13	5	1	5	0	8	4	1	5	2	6	6	0	1	6	2
10	Os09g0426800	WSL2	Os09g0426800|WSL2	9	6	1	10	1	7	7	0	3	0	3	4	1	1	9	3
11	Os02g0465900	OsARP	Os02g0465900|OsARP	6	8	2	3	1	7	5	0	5	2	9	1	2	5	4	4
12	Os01g0733500	RD22	Os01g0733500|RD22	5	8	0	5	3	2	5	0	5	2	13	4	2	4	2	2
13	Os09g0438100	Os09g0438100	Os09g0438100|Os09g0438100	5	7	0	8	3	2	2	0	5	0	14	6	1	2	4	3
14	Os09g0438000	rbohG	Os09g0438000|rbohG	8	6	0	6	3	3	2	0	5	1	8	2	5	7	4	1
15	Os06g0129400	OsSPX-MFS3	Os06g0129400|OsSPX-MFS3	9	3	1	1	4	5	5	2	3	2	10	3	3	6	2	2
16	Os03g0114800	Os03g0114800	Os03g0114800|Os03g0114800	3	12	0	2	3	2	3	0	9	1	11	1	4	2	6	2
17	Os05g0453300	Os05g0453300	Os05g0453300|Os05g0453300	8	3	0	3	5	10	0	0	5	1	10	8	0	0	3	4
18	Os04g0508800	OsRFP	Os04g0508800|OsRFP	3	7	1	1	2	9	7	0	9	0	7	8	0	0	3	3
19	Os03g0592500	LHCB	Os03g0592500|LHCB	11	8	2	2	0	8	4	1	1	0	4	5	1	3	9	0
20	Os04g0234600	Os04g0234600	Os04g0234600|Os04g0234600	11	8	1	0	2	0	3	0	8	0	8	6	1	2	8	1
21	Os08g0434300	MDH	Os08g0434300|MDH	5	10	1	1	3	0	1	0	7	2	11	2	2	5	7	2
22	Os08g0508800	Lox2:Os:1	Os08g0508800|Lox2:Os:1	2	10	0	8	0	6	2	0	8	0	6	7	1	2	7	0
23	Os08g0364900	Os08g0364900	Os08g0364900|Os08g0364900	3	6	0	4	0	8	5	1	7	1	8	6	1	4	4	1
24	Os02g0815700	OsCttP2	Os02g0815700|OsCttP2	9	8	1	1	3	7	8	1	3	1	4	2	0	2	4	4
25	Os09g0297000	FC1	Os09g0297000|FC1	5	11	0	1	2	2	1	0	6	2	9	4	2	5	6	1
26	Os03g0336000	Os03g0336000	Os03g0336000|Os03g0336000	9	5	0	2	1	4	3	0	4	3	10	4	2	3	5	0
27	Os06g0486800	OsFDH	Os06g0486800|OsFDH	5	9	0	4	2	7	4	1	3	1	4	2	1	5	6	1
28	Os11g0145200	OsUGT75E1	Os11g0145200|OsUGT75E1	5	7	1	1	0	2	3	0	6	1	14	7	1	1	4	2
29	Os01g0111100	OsCYP26-2	Os01g0111100|OsCYP26-2	5	12	0	6	1	3	3	0	4	0	5	3	1	4	8	0
30	Os02g0710900	Os02g0710900	Os02g0710900|Os02g0710900	6	11	1	2	1	7	5	0	3	1	8	1	0	2	6	1
31	Os03g0850400	Os03g0850400	Os03g0850400|Os03g0850400	6	11	0	1	0	3	1	0	4	2	16	5	1	2	2	0
32	Os06g0528600	OSSPDS2	Os06g0528600|OSSPDS2	3	11	0	1	0	1	0	0	3	3	13	4	0	1	12	2
33	Os07g0148900	PsaK	Os07g0148900|PsaK	10	8	2	0	0	1	2	0	5	3	12	1	1	3	6	0
34	Os08g0141400	Os08g0141400	Os08g0141400|Os08g0141400	3	5	0	5	1	8	4	0	1	0	9	5	0	4	5	4
35	Os01g0551000	Os01g0551000	Os01g0551000|Os01g0551000	3	1	0	8	6	2	1	0	4	2	7	4	2	4	6	4
36	Os03g0129300	GADPH	Os03g0129300|GADPH	11	6	1	2	1	1	1	0	5	0	15	3	0	2	4	2
37	Os01g0803200	Oc1*	Os01g0803200|Oc1*	10	7	2	0	2	6	4	0	5	1	5	2	0	3	3	3
38	Os06g0716000	Os06g0716000	Os06g0716000|Os06g0716000	3	7	0	4	1	5	3	0	7	1	7	1	1	7	5	0
39	Os03g0849800	Os03g0849800	Os03g0849800|Os03g0849800	3	5	0	1	1	2	2	0	4	3	17	4	4	2	2	2
40	Os02g0101500	OsHPR1	Os02g0101500|OsHPR1	7	7	1	2	2	3	1	0	5	1	7	3	1	3	5	4
41	Os08g0141300	Os08g0141300	Os08g0141300|Os08g0141300	6	6	0	4	0	3	1	0	11	2	8	1	1	2	6	0
42	Os03g0700700	OsLOX1	Os03g0700700|OsLOX1	9	2	0	8	1	6	4	0	4	1	6	1	2	0	5	2
43	Os05g0501700	Os05g0501700	Os05g0501700|Os05g0501700	5	8	0	4	0	5	2	0	7	0	9	1	1	2	4	2
44	Os05g0439400	OsPUB44	Os05g0439400|OsPUB44	9	6	1	5	4	4	2	0	3	0	4	2	1	2	5	1
45	Os05g0186300	OscytME2	Os05g0186300|OscytME2	5	3	0	5	0	6	4	0	5	0	4	6	3	2	4	2
46	Os01g0117300	OsRLCK17	Os01g0117300|OsRLCK17	7	5	0	6	0	4	1	0	3	1	7	2	0	2	10	1
47	Os10g0462900	Os10g0462900	Os10g0462900|Os10g0462900	9	8	1	1	2	3	1	0	5	3	9	3	1	1	2	0
48	Os03g0744700	Os03g0744700	Os03g0744700|Os03g0744700	6	9	1	1	1	4	3	0	8	1	4	3	2	2	3	0
49	Os12g0115700	CHI	Os12g0115700|CHI	4	7	0	4	2	1	1	0	5	0	5	4	4	5	4	2
50	Os12g0420200	CSP41b	Os12g0420200|CSP41b	4	10	0	1	1	4	2	0	6	3	6	1	0	2	7	1
51	Os04g0390100	Os04g0390100	Os04g0390100|Os04g0390100	8	6	0	5	1	4	2	0	5	2	7	2	1	4	0	0
52	Os10g0530500	OsGSTU13	Os10g0530500|OsGSTU13	4	9	1	1	0	3	1	0	6	1	3	6	2	2	5	2
53	Os03g0192700	OsINO1	Os03g0192700|OsINO1	3	6	0	3	2	3	0	0	5	2	7	4	2	2	6	0
54	Os01g0227800	Os01g0227800	Os01g0227800|Os01g0227800	2	6	0	5	0	11	4	0	4	0	3	2	0	0	6	2
55	Os03g0844900	Os03g0844900	Os03g0844900|Os03g0844900	7	9	0	1	0	4	4	0	5	0	3	1	1	3	4	3
56	Os07g0524900	Os07g0524900	Os07g0524900|Os07g0524900	6	7	2	4	0	4	1	0	5	1	6	1	1	1	5	0
57	Os04g0618200	Os04g0618200	Os04g0618200|Os04g0618200	3	5	0	4	0	3	2	0	5	1	11	1	1	2	3	3
58	Os12g0534100	Os12g0534100	Os12g0534100|Os12g0534100	7	6	1	3	0	4	2	0	4	2	9	1	0	1	3	1
59	Os11g0520500	Os11g0520500	Os11g0520500|Os11g0520500	7	6	0	3	1	3	2	0	6	0	5	2	2	2	3	2
60	Os05g0468900	Os05g0468900	Os05g0468900|Os05g0468900	7	7	0	3	2	2	2	0	2	1	7	5	0	2	2	1
61	Os01g0639900	BETACA1	Os01g0639900|BETACA1	9	4	0	4	0	3	6	0	2	1	5	4	0	2	2	1
62	Os09g0294000	Os09g0294000	Os09g0294000|Os09g0294000	3	4	0	4	3	3	2	0	2	2	7	3	0	1	8	0
63	Os05g0429500	Os05g0429500	Os05g0429500|Os05g0429500	6	12	0	0	0	1	3	0	4	2	9	1	0	2	0	1
64	Os02g0783625	Os02g0783625	Os02g0783625|Os02g0783625	7	3	0	2	0	3	3	0	4	0	2	5	1	2	4	5
65	Os03g0238300	Os03g0238300	Os03g0238300|Os03g0238300	0	5	0	6	0	2	3	0	3	5	7	1	0	0	7	0
66	Os08g0485900	Os08g0485900	Os08g0485900|Os08g0485900	7	5	0	2	0	1	0	0	6	1	2	1	2	2	8	1
67	Os04g0496000	Os04g0496000	Os04g0496000|Os04g0496000	3	5	0	2	1	3	1	0	5	2	7	4	0	0	4	0
68	Os12g0428000	OsStr7	Os12g0428000|OsStr7	6	7	0	3	0	5	1	0	4	0	2	0	0	2	6	0
69	Os11g0455500	Os11g0455500	Os11g0455500|Os11g0455500	2	5	1	1	1	1	2	0	4	0	7	5	1	3	1	2

## Sheet: Enrichment
Order	Gene index	Gene ID	Gene symbol	NF-CO	NF-Y	NF-YB	NAP	NACR	ABRELATERD1	ABRERATCAL	ABREATCONSENSUS	MYB1AT	MYB2AT	MYBCORE	MYBCOREATCYCB1	MYBPLANT	MYBPZM	MYBST1	DRECRTCOREAT
1	Os_1	Os01g0111100	OsCYP26-2		1.94805		1.92926										1.63934	1.73913
2	Os_2	Os01g0117300	OsRLCK17				1.92926											2.17391
3	Os_3	Os01g0227800	Os01g0227800				1.60772		2.72953
4	Os_4	Os01g0551000	Os01g0551000				2.57235	5.82524					1.81818			1.96078	1.63934		2.06186
5	Os_5	Os01g0639900	BETACA1	1.50754						2.20588
6	Os_6	Os01g0733500	RD22				1.60772	2.91262		1.83824			1.81818	1.62095		1.96078	1.63934
7	Os_7	Os01g0803200	Oc1*	1.67504		4.54545		1.94175											1.54639
8	Os_8	Os02g0101500	OsHPR1			2.27273		1.94175											2.06186
9	Os_9	Os02g0465900	OsARP			4.54545			1.73697	1.83824			1.81818			1.96078	2.04918		2.06186
10	Os_10	Os02g0626400	OsPAL	1.84255			2.2508	1.94175					1.81818			5.88235	3.68852		1.54639
11	Os_11	Os02g0710900	Os02g0710900		1.78571	2.27273			1.73697	1.83824
12	Os_12	Os02g0744000	Os02g0744000				1.92926	1.94175	2.72953	2.20588			2.72727			2.94118	1.63934
13	Os_13	Os02g0783625	Os02g0783625																2.57732
14	Os_14	Os02g0815700	OsCttP2	1.50754		2.27273		2.91262	1.73697	2.94118	4								2.06186
15	Os_15	Os03g0114800	Os03g0114800		1.94805			2.91262				2.16346				3.92157
16	Os_16	Os03g0129300	GADPH	1.84255		2.27273								1.87032
17	Os_17	Os03g0192700	OsINO1					1.94175					1.81818			1.96078
18	Os_18	Os03g0238300	Os03g0238300				1.92926						4.54545					1.52174
19	Os_19	Os03g0336000	Os03g0336000	1.50754									2.72727			1.96078
20	Os_20	Os03g0592500	LHCB	1.84255		4.54545			1.98511		4							1.95652
21	Os_21	Os03g0700700	OsLOX1	1.50754			2.57235									1.96078
22	Os_22	Os03g0744700	Os03g0744700			2.27273						1.92308				1.96078
23	Os_23	Os03g0844900	Os03g0844900																1.54639
24	Os_24	Os03g0849800	Os03g0849800										2.72727	2.1197		3.92157
25	Os_25	Os03g0850400	Os03g0850400		1.78571								1.81818	1.99501
26	Os_26	Os04g0234600	Os04g0234600	1.84255		2.27273		1.94175				1.92308			1.69014			1.73913
27	Os_27	Os04g0390100	Os04g0390100				1.60772						1.81818				1.63934
28	Os_28	Os04g0414700	PSAO	2.51256		9.09091			2.72953									1.73913	2.06186
29	Os_29	Os04g0459500	Os04g0459500	2.17755		2.27273	1.60772		1.98511		4		1.81818		1.69014
30	Os_30	Os04g0496000	Os04g0496000										1.81818
31	Os_31	Os04g0508800	OsRFP			2.27273		1.94175	2.23325	2.57353		2.16346			2.25352				1.54639
32	Os_32	Os04g0618200	Os04g0618200																1.54639
33	Os_33	Os05g0186300	OscytME2				1.60772								1.69014	2.94118
34	Os_34	Os05g0429500	Os05g0429500		1.94805								1.81818
35	Os_35	Os05g0439400	OsPUB44	1.50754		2.27273	1.60772	3.8835
36	Os_36	Os05g0453300	Os05g0453300					4.85437	2.48139						2.25352				2.06186
37	Os_37	Os05g0468900	Os05g0468900					1.94175
38	Os_38	Os05g0501700	Os05g0501700									1.68269
39	Os_39	Os05g0535900	Os05g0535900	2.17755			1.92926						1.81818		2.25352				1.54639
40	Os_40	Os06g0129400	OsSPX-MFS3	1.50754		2.27273		3.8835		1.83824	8		1.81818			2.94118	2.45902
41	Os_41	Os06g0486800	OsFDH					1.94175	1.73697		4						2.04918
42	Os_42	Os06g0528600	OSSPDS2		1.78571								2.72727	1.62095				2.6087
43	Os_43	Os06g0716000	Os06g0716000									1.68269					2.86885
44	Os_44	Os07g0148900	PsaK	1.67504		4.54545							2.72727
45	Os_45	Os07g0524900	Os07g0524900			4.54545
46	Os_46	Os08g0104600	Fd1		1.62338		2.57235		2.48139	2.57353	12	2.16346
47	Os_47	Os08g0141300	Os08g0141300									2.64423	1.81818
48	Os_48	Os08g0141400	Os08g0141400				1.60772		1.98511								1.63934		2.06186
49	Os_49	Os08g0364900	Os08g0364900						1.98511	1.83824	4	1.68269			1.69014		1.63934
50	Os_50	Os08g0434300	MDH		1.62338	2.27273		2.91262				1.68269	1.81818			1.96078	2.04918	1.52174
51	Os_51	Os08g0485900	Os08g0485900													1.96078		1.73913
52	Os_52	Os08g0508800	Lox2:Os:1		1.62338		2.57235					1.92308			1.97183			1.52174
53	Os_53	Os09g0294000	Os09g0294000					2.91262					1.81818					1.73913
54	Os_54	Os09g0297000	FC1		1.78571			1.94175					1.81818			1.96078	2.04918
55	Os_55	Os09g0426800	WSL2	1.50754		2.27273	3.21543		1.73697	2.57353								1.95652	1.54639
56	Os_56	Os09g0438000	rbohG				1.92926	2.91262								4.90196	2.86885
57	Os_57	Os09g0438100	Os09g0438100				2.57235	2.91262						1.74564	1.69014				1.54639
58	Os_58	Os09g0532000	SGR				3.53698		3.22581	2.57353	12	1.92308	2.72727			1.96078
59	Os_59	Os10g0462900	Os10g0462900	1.50754		2.27273		1.94175					2.72727
60	Os_60	Os10g0502400	HEMA1	1.67504				2.91262	1.73697				1.81818			1.96078
61	Os_61	Os10g0516100	OsGDCH			4.54545							5.45455	2.36908		4.90196	2.04918	1.73913
62	Os_62	Os10g0530500	OsGSTU13			2.27273									1.69014	1.96078
63	Os_63	Os11g0145200	OsUGT75E1			2.27273								1.74564	1.97183
64	Os_64	Os11g0455500	Os11g0455500			2.27273
65	Os_65	Os11g0520500	Os11g0520500													1.96078
66	Os_66	Os12g0115700	CHI					1.94175								3.92157	2.04918
67	Os_67	Os12g0420200	CSP41b		1.62338								2.72727					1.52174
68	Os_68	Os12g0428000	OsStr7
69	Os_69	Os12g0534100	Os12g0534100			2.27273							1.81818

## Sheet: PSAO-PSAK-LHCB_SGR_enrichment
Order	Gene index	Gene ID	Gene symbol	NF-CO	NF-Y	NF-YB	NAP	NACR	ABRELATERD1	ABRERATCAL	ABREATCONSENSUS	MYB1AT	MYB2AT	MYBCORE	MYBCOREATCYCB1	MYBPLANT	MYBPZM	MYBST1	DRECRTCOREAT
28	Os_28	Os04g0414700	PSAO	2.51256		9.09091			2.72953									1.73913	2.06186
44	Os_44	Os07g0148900	PsaK	1.67504		4.54545							2.72727
20	Os_20	Os03g0592500	LHCB	1.84255		4.54545			1.98511		4							1.95652
5	Os_5	Os01g0639900	BETACA1	1.50754						2.20588
58	Os_58	Os09g0532000	SGR				3.53698		3.22581	2.57353	12	1.92308	2.72727			1.96078
