# Supplementary material for: A Comparative Transcriptomic Meta-Analysis Revealed Conserved Key Genes and Regulatory Networks Involved in Drought Tolerance in Cereal Crops
Source: Int J Mol Sci. 2021 Dec 2;22(23):13062. doi: 10.3390/ijms222313062 (PMC8657901; doi:10.3390/ijms222313062)
Supplement: Supplementary file 1 [file ijms-22-13062-s001.zip › Supplementary_Table_S9.txt]

>Os04g0414700|Os04g0414700	Os04g0414700; upstream from -3000 to -1; size: 3000; feature type:gene; location: Oryza_sativa.IRGSP-1.0.46:4:20493054:20496053:D
ATAATATAGTGATTTAAGATAAGATGTGATATTTTATACTACAATAAATTTTGTCTTAGG
TTGCTATATACTATATCCATCTCAAAATATGTACATCCGTGGATATCTGTGTCCAACGTT
TGACCATTCGTCTTATTTAGAAAAATAAAAAAAATTAGTCACACATAAAGTACTATTCAT
GTATTATCATCTAATAACAATAAAAATACTAATCATAAAAAATATTAAATAAAACAAATA
GTCAAACATTGAATGAACAATGCAAAACATTATTTATTTTGGGACGGAGGGAGTATATTA
TGAAAAGTAACCACGCTAGTGTGTATGGTAGCCGCGGAATGGGCTGGCCTTCGGGAGTTC
GGGATCTTTACGGATTGGAATAAGTGCACTTTAGGTCTCTCTATTCGTCGCTCAGTCCGA
TTTTCGTCCCTGAACTGTAAAACCGGGTACAACCCATCCCCCAACTTACGAAAACCGGAC
AAACGAGGTCCCTCGGCAGTATGGAGGGCAGTTTTGGCCGACGTGGCGTCTATGTGGCTA
ATTTGACTTGATCTTCATCTGACGTGATATTGACATGGCGCTGACGTGGCAATTCGATCC
AGAAAAATATTAAACCCCGTGGCACCCACATGTCAGTTTGACACACAAATTAATAAAAAA
TAGTGGGGCCCACGTGAGCCCCACATATCATTCTCACCCTTCTCTTCTTCCTCCTCCCTC
CCTCTCCCTCTCCCTCTCCCTCCCCTCTCGTGGAGGAGTTCAGGGCCGCGCATGTGGGCG
CGGTGCCGGGAGCTGCACGACCGAGTCGTGGCGTCCGCGTCCCCTTCCCTGCTGCGGCAG
CCCGCGCTGCGGTCCCTCCTCTGCCTCGTTGCCGTCGAGCTGCAGCTCCTCAAACTCCTA
AACGACACCACTAATCAATGGATAGCTAGCTAGAGGAAGAGCTCAACTGCATGTCTGCCA
CTCTGCATGCTTATGGTTCATGGTGTTTATGGTTGGGGGTTGAAGCCAGCTTGAACACAT
GTGTAGTACTTCGGTCAACTACATTGGTAGAGAGTATAATTGGACTGAGCTGCGTTGGAT
GGATGTGAAGAAGAGCGAGACGGCACGAGGCAAGTAGCAGGTGATGAGGCTGCAAAATGA
GAAGGAACATGAGCAAGTGACGACGACACAGTCGTGCAGCTTCCGGCACCTCGCCCGCGT
GAGCTCCAGTTCGTCGGAGTCGGGCGGCGCCGTGGCCCCGAACTCCTCCACGAGCCCCCG
CGCGGGGTCCGCGCCGCTGCCGTGGAGGAGGAGGAGGAGGAGGAGACCACGGCGGCCGGC
TGTGCCAGTGGGAGAGGGGGAAGAGGAGGCCGGCGAGCAGGTTGCCGCCGAGTTGCAGCC
GCACACGGGCGGGAACTTAGCGCCGCACCCCGCCAACGACGAGGTTCCCGCCGTTCGCTT
GGCTCCACCGCCCCGCCGGCTTCGGGCGCCGCCACTGCGCCCGCGCGTCCGCCCGCCGCT
GCCCCACTCCGCCCCGTCGGCTTTGCGCCGCCGTCCGCCTGCCGCCGCCCCCCACTCCGC
TCCGTCGTTGTCCCCGGCGCCGCTGCTATGTGGGGTGAGATGGGGAGAAAGAAGAGGTGG
GGTGAGAATGACATGTGGGGCCCAGTGGCCCACGTGGGCTCCACCATTTTTTATTAATTT
GTGTGTGAAACTGACATGTGGGTCCCATAGTGTTTAATATTTTTCCAGATCGAATTGCCA
CGTCAGATGAAGACTGAGTCAAATTAGCCACATAGGCGTCACGTCGGCCAAAACCGCTCT
CCATACCGCCGAGGGATCTCATTTGTCCGGTTTTTGAAAGTTGGGGGACGGGTCGTACCC
GGTTTTGTGGTTCAGGACAAAAATCGGACTGAGCGACAAATAGGGGACCTGAAGTGAACT
TATTCCTTACGGATTTGCGTCTCCCGCCCGCTGGGTTAAGAACTTACGACGAGCCGCTGT
TTCTGATCGTGTGCAACGGTGAATTGGTAAAGTCTGCTGTCTGCAGCGAAGCCCGGTATC
ATGCCTTGTGAGGTGAACGAACTAGGCGGGCCGGTGGCTCATCACATCCACACAAGTTAT
CTACCTGTTCACCACTTTACCTCGTTAAACAGCTCCAGTTCACCAATTGCATAGTCTAGA
GTCTAGACCTCGATCACATTCCAAGGTAGTAGCACGAAAACAGAGTACCTGATCTGGAAA
AACATAGTGCCGGCCATCGCCTACCAAAGTATGATTTGCGGGTACACTACTACGTGCAGT
TAAACTTGTCGAAACAAAGATTTCGGTAATACGAAAAAGGGTGGCTATCAAGCTAGAAAA
GTGGATGGGTTTAGAGACACAGGTTCAGGCCATCTCAATGAGAAGTAATACCCTACTCCT
GTCCGGGGATTAATCCACCGAGTATATTATTGATCGTATGATCTGGGAGAAAAGTTATGT
CCCAAGAGATACTCGGACCCCTCTTTATATAGGGAGAGGAGTCCGTATTACAAGGTATAG
CCTATATTCCTAACGGAATAGGCAAATAAAGATAAAATACAGTCGTAACCGACTAGAATC
CCGAGTATTTCCTTGATATACAAGTTAAGGAATGTAACCCGAGTCCCTTAAAGATATTCT
ACCTATATATGGCATTCCATATCCAGTCGGATATACATGCCGTGTAAATATGGGGTATCC
ATAATCTCCACAAAACTGCCATAGTCTTCTACTGACGAAATTAAGTTTGCCTCGGTAGGA
ACTACTAGCTGAGTACTCAGCATACTGGACGGCAGAAACAGCCGTGGCACTGGCCTTATC
CACTCATATCCAAGTGGAGTCTCCCAATAGGCCGCTGCACGGGCGACGAATCTATTTCAT
CCGCTGCAAGTGATCCACATCACGCGAGCCCCCACAACGATCCGCGCCCGCTCATCCCCT
CCCGCCACGTCCGCAACCGCAGCCACCACCACAAAATAAGGCCTAACCTACGCTGCCACA
>Os05g0535900|Os05g0535900	Os05g0535900; upstream from -3000 to -1; size: 3000; feature type:gene; location: Oryza_sativa.IRGSP-1.0.46:5:26613540:26616539:D
GACAGTGGATTATGTTTTATGTGTGGATCGATCAGAAGAAGCCAAAGAAGTTCCCTGTTT
CGCTGTCGTTTGATTTGTCTTTGGCCTTTGTAAGTATCCCGCTTCAGTACTCGGTAGCAG
TATCTTCAGGGATACTGAGTATAGTAGTCGTACTGGCAGGAAATTGAAGGCCGGCAATGG
CAGCTTCAAGTACCCGATTTACTACTACAGGAGGGCACAGTTAGGTTGGCATATGATTGG
ATCATTGGAGCAGCAGGGTACGGAAACAAATCCTCGGCAGTACTAGTAGCGGTGATTGAC
GTGTGGGTCCGGAGCCACACGTCAATGTCTGCTACTGTATCAGTAGTACTGCAGACAATC
CACACTGGTAAAGTACTACCTGATCTACCATGGGATCGCCATTTGCCGTAAAGAAGTGTT
TTCATTCCTGAATGGATATCTTCTCATTTCTTGCATACCATCTATTTAATATTAAAAAAA
ATAAAAAATACAAGATAAATTAGTATAAAACATATTACACCAGAAACATACCATACCAAA
TTCGATTTCTGTAAATTAAAAGTAGTTAACGTATGAAAAACGAGAGAATGTTTCCTCCAT
GCATGGAAGAAAATTCACCTCCCATTAGCTGCCAGTAGTAGTGGTCGGTTTGTTGCTAGC
GGCTGCCATTCTGTCCATGTAAAAACAAGCACATGAGGCGTTTGATGGCGGTGCGTTCGG
TGGACCAGTAGTCCAGTACTACTACGACTGCACAACACAGAACCACACTGCTCAATGGAG
TGCGTGTTTTTCGCTGCAGGGGACGGTGGTGAAAGTGAATGCGATTTTTATACGTCGCTC
GTGCGGTCGTGCCGCGCGCGCCGGTTGCCCCCTCCACCGCCGTTCGACCGTAACTCCGCG
CTTGCGGCTCTCTCGTACGAGAAACCGCGGCGCGCGGCGGCGTTAAAGCGCGGCCGCCAC
CGTTGCGCGATCGGCGGGGAGTTGGAGGCAAGCATGCACACCTGAACCTTCTCGGTTGGA
AGGTTAGGGGCGGAGCTTAAAAAAAAAAAAAGTATTTCCTCCGTTTCAAGTTACAAGAGA
CTTCTTATAGAATGCGGACAATGCTAGAAAGTCTTATAACCTAAAACGGAGGTAGTACCA
CTCATTCGTTTTATTTTACTTTGAATCGAGTTGAAGCTAATACGTGTAAGTTTGCATTGA
GAGATGCATGTAGTGAAAATAAATGAACTATAACTGAAAAGAAAAAAAATACCTGGTTAC
TGGGCATCTCCTTTTATAGTGTAGCTCCGCCTTTGTGGTAGGCTAGAAAAAAAATGTATT
TGTTTAAGCTAGGGCTAATAAGTCATATAATCTCTATCAAATCAAGAAAAACACACGGCA
CCATACAACGAAGAACCGTTCTGTCAACGAAGATCGGTCGCCTCAGCACCACGTTACCTC
TCGCGATTGATAATTGCTTCGCTGGTGGTCAGATCAACTAGACAATTAGTATCGGACTCG
GAGATTACTACTGCAACTAACAGGGCGGCAAAGTCAAGGCCAGCTGCATGCATGCATGCA
GATTGCAGAGCGATGGGCCGGTAGTTCTGTAGTCGGTCCTTGTGTCGCCCGGAGTTTGGA
GTAACTTGCTTAGAAATTAAAGCAGATTGGTGCATTTTGCGTTGCTGAAACATTAATTCC
AACTTGAAATATAAGTGGATTCCATATGATATTCGGAAGAATTTATTTTTTTCAAAGAAA
ATAACAGATTTGCACAATTTTCACACAGGAGCATCAAAGAAACATCCGACGTAATGAGAC
GAGCTAAACTAGGTTTTTAACTCGTGAGATCATTTTCATATGCACTTTCTAATTACTCCT
TCCCTATCATAACATGCTCATTTTTAGCTCTTATCATTTGTGTTTTTTAAAAAATATTTT
TAGAGTAATCATTACGTCACGGTTTGTTAAAATAAAGAATAATTATATTGGGAATAGATA
AAGTGGATACTAATTACATTGGAATTATAAAAATAGATGTATTCTAGTAATTTTGGCTAT
GTATTTGTATGTGTGGGATGAGTGAAAAATAAACTTATTTTGGGATAGAGAGTAGTGCTT
AATTTTTTAGCTATAGGTTTAGTGCTTTACCATTATTACGTTTATGTATAATAAAATGAT
AGGAATAAGACGGAACTTATTTATGAGCCAGTACACGAGTGATGAGTCGAGTCAAATTAA
ACATTTTGCTTGTAAAATTAACAAGACGAAGCTGATCCGACTTTTTAATTAGGAGCTGTC
TATATGTTGACAGAAAACCCTATAAATCTTGCAACGAGCTCAGTCCACCCTAATCGCATA
GACAAGACTCCATTTCAAAACGAGCAGAGCGTCAAACCGTTTCCTAATCAGGCCATAAAA
GGCGGTTCAAGCCGTTAATCACCACACATACCCTTTAATCTCTCGGTGACATTGGAGGCG
CATGCACGGCGCCCGCTGACATGTGGTCCCACCCTGCAAATACTGTGGGTGGGGACTCGG
GTTGACAGCTAGCCGGTTAAAAAAGACGAGGCTTCCCGCTTTTCTCAGTAAAAAAAAAAA
GGCTCCAGTACCACACCAGCTGTACAAAAAGTTCGACATGGCCCACTGACAAGTGGACCC
CACCTCGCTTCGGCCCCACTCCTCCCCCCATCATTTTTTTTCCCAAGCCACGTTCACCTC
GCCCCCCACCGACGAGCCGCACCCACTCATTAAAAAAAACAAACAAGGCCCCACACGTCA
CACTCTCAGGAGCGGGGAGTGGGACCCACATGTCAGTGAAGGTGGGTCAGCCTCACCTGG
TCAGGCGGGGTACCCGTACTGGGACGGACGCGAGGTGGTGGTGGTTCCGTTGGGCGGTGG
GGCCCGCACGCTGGCTCAGTCATCAGTTCGTCACACTACTCGCCTTTTTTTTTTCCTCTC
CCTTTTTCTCGCTTTTTTTTTTTTGGCCCAATTTGTTTTATCCGCTTCAGCGCTCTCGCT
>Os02g0626400|OsPAL	Os02g0626400; upstream from -3000 to -1; size: 3000; feature type:gene; location: Oryza_sativa.IRGSP-1.0.46:2:24989389:24992388:R
AACCGATGTGTTTGGTATAAAAACTTTCCATGGAGAATTTTTTTTAAAAAAAATCAATTT
TCAAATTAGTAGTATTTAATACCTAATTAGTTACTTCTTCCGTCCCATATTAAGTTCATT
TTTAGCACCTTCCATTTGTCCCAAACTAAGTTTATTTTTAGAGTAATCATTGCATTGGAG
TTTGTGAAAGTATGGAATACTTCCTCCGGTTCCATATTAATTGACATTTTGAACAAGGTT
GAGGTCAAACTTTTATAACTTTGACCATCAATAACTTTATAAATATTTAGTTTAAAGGAA
TTAGAACAACATATATAGATTTTTCTTTTAAAGCACTATAATAAAAGTAAACATGCATTT
ATTTATTATATATATTATAATAAAAAAAATAAGGTCAAAGATATATCTCGTAGACCGTAT
CATTGTCCAAAACGTCAATTAAAATGAAACCGGAGGGAGTAATTGTATTGGGATTAGATA
CAGTGAGGATTAGTTGTATTGGGATTTGATAAAGTATGGGTATTCTAATTTTTTTTTACT
TTTTATTGGTATGTGTTAGATGGGTGAAAAATAAACTTATTTTGGTATGGAGGTAGTATA
CACTAATTACTCATCTCATTTTACGTACAACTAAGTATTTTTTTTACATAATGAAAATGA
TTTACATCTCCGGTTTCTGCCAATATGCGCACGGCTAATGAGTCAAGAAAAAAAAAAAGA
TAAAAAAGCTTAAGGTTATGGGACACAAACCTCATCTTCTTTCTAAAAACAAAATATCAG
TTAGAAAACACATAGAACCTATAACAATATTCTAAAAAAAATTACACCAACCAAAGTAGG
ACAAAAGACTCGTGGCTACCGATTCTAAGAGTGTAGTTTCATTACGTACAGTCTCCCACT
TCTCCTATGAAAGCATCAAGGATTAATAATAGAGTCAACTGGAAGACGTGAAGATAACCT
GCATGTGGTTAGACAATTTCTTGTTATTGAAAACTATATCATTTTGACCATGCCAAATTG
ATCAATGTAAGGTATTAGTTCCAAATAAAATAAGTTTTTTAATGGATTTAGTACGTACTC
CCTTTATCGAACTCACCCTAAATTTTCAACAAACCTCGGACCTTTGAAACACCAAGCCAA
CCATCCATCTTGAAGTCAATGAAGTCACTCATGGTTGCTTATCTCATTATCTTAAAAAAA
AAAAAGGTTGCTTATCTGAAGAACGTTGAAGCAGCAACATTTTCGCAGCTCCTATATGAA
GAACGCAAGTAGTAGGAGGTTGGTGGAGGAGATATACGAATGACGTTGTCTGAATGAACT
TACGGGAGGGCCCGGATACCCAACACCCTGTTTGGTGCGAGCTTAGTTGCCAACCACAAC
GGAGTAGATCGACCTGGCCATCAAGCTGAGTTGGTCACCATGAGTTCGTTGTTACCAACC
ACACGCAAAAAGTGTGGATAAAAATATTAAGACAGCCCTTTTAAATGGACAAAAAATAAT
CACATGGACGATGCATTGCTGTACCTGCCTCCCATTGAACCGGCTCTTTAATATTTCCTG
GTTCTTAAAGTAAGAAACGTGGAATCTTCATGGTTCAACTGTGCTCGTGCTACTCTTCGG
GACAATGTGGGAGTAAATCATTGTTTATACCAGGTTCTTTACGCGCAACATAGCGCCTGC
TTAACTGCATAATACACGAGGAAAAAAACTAAACAATTTGCTTCATTTTGTCTGAACTCT
GAAGGCTTCAACTTGCTTTCCTTGGAAGTTCTCTGTTGGTACAGAATCAAATGCGGCAAC
TTGAGCTCAACGCGTCTGTACCAAAAGAGAGAGAGAGAGAGTTGCAAACACATCGCTTGG
CTTAACGCTGAAAATGACTTATCATAAAAGAAAATTCATAGATAATTTTTTATATGTATA
TTTAGCGATTAAAAATCAATGCTAAAAAAACTACGAAGAAAAGCCCTAAATCAACTCTAC
AATTAAAATTTTAAATTTAAATTTTATAGCTGCATAAGCTGTTGGCCAAAATGCCTCCGT
GTGGACGTACTACAAGCTTTAAGCCCATTTTCTGCTGCTGCTGTAGTGCTGTTGGCCAAA
ATGGCCCTGTTGAGGCAATTCCTCCACATCTCGCACAGCCAAAAGGTGACTGTAGTTTCT
GAACGGTCTTGTTTAGATAAAAAAAAATTAGCCAAAAAGTCACATCAAATATTTGAATAT
ATGCATGAGACATTAAATGTGGAAAAAAACCAATTATACAGTTTATATGTAAATTGCGAG
ACGAATCTATTGAGTCTAATTACGCCATAATTTAACAATATGATGTTACAGTAAACATTT
ACTAATGATAAATTAATTAGGCTTAATAAATAGCTCGTATACACACCCTTCGCTCTGCAG
CAATTCGCGCTCCGAATAATGAACCGATCACGTCATTTCATCGTGTTGTCCTGATGACCA
CTTGGGTCAGTCCTGCACTCCTGCAGCGTCTCGGATCTCGGAGTGGGTGCATGTGTAAAA
ACAGGACGATACCGGATCGAGCGACCGACGGACCGACGGACCGACTGACCGCGAGAGACC
GTCAGCGTTGGCTCAGCAGAGGCCTCCCGTCCACACACGCGCTCTCGCTCGCTCTCTCCG
TCCCACCAACCCCCGCCAAATCCCCCGGCCGCGCAAGTCTCCAGCCACCCACCCCACACA
GCTACGCACCACCGAGGCAACACGCAACGCAAGCGCCGCCGCCGAACCAACCGGTTCCCC
CGGCTCGGCGCCTCGCCCCAATCACAATCCTGCAGGCAGAGCAGCCACGCGAGCTGGCCA
GGTGGGCCACGCGTCGCGCATCGCCGCATGGTAAGATTGGTAGGCAGGCCCCATCCGACG
GCGAGCGTATGGTCAGCTAGCCAACAACCAAACCCCACACTGCCCTGGACGCCCTTAGCC
CCAACCACCATCACCCGTCGCCACGCTATTTAAGCGCCCGTTCCCCCACCGTTCTTCTCC
>Os03g0592500|LHCB	Os03g0592500; upstream from -3000 to -1; size: 3000; feature type:gene; location: Oryza_sativa.IRGSP-1.0.46:3:21997043:22000042:D
TTGGAGGGGCGGTTTTGCTGACATGGCGCTGATGTGGTGGTGTTGACCTAGTACGTGGGG
TTGACGTGGCGCTTAGGTGGTATTTGAATAAAAAACATATATGTGGGACCCGTTTGTCAT
TCACACACATAAATTTTGTGGGGTCCACTGACATATGGGCCCCACATGTCATCCTCTCTC
TCTGCTTCCTCCCCTCTTCCTCCCTTCTCTCTTTCTTTCTCTTTCTCTCCCCTTCGGTGG
CGGCCAACGAGAGCGAATGGTAGTGGCGGCACTGCCCCAAATGCAACCGGCGTGGCTCCA
GCGATGCCGCCCCTCGTCCTCCTCCTCTCTCCCTTATTTATCTCTTTCTCCCACCTTTAC
TTCCCTCGGCAGCGGCGGTGAGCAGTAGCCGGTAGGGGAAAAGAGCTAGGTGGCGACGCA
AGGCATCCAGGCTTCTCCGTTTCTCTAGCAGCGTCGCCTCCTCTTCCATCTTCGATATGG
CGCCACCACGGCAAGTGAATCTGAGGGGAACGAAAGGGCGAGGCGATCGACCAACGGTGG
TGGTGGGCACCCCTAGACCTGGAGCGGCGGCGGCATCGAGCAGCGCGGACACCGAGGTCC
ACAAGAGGGGTGGCCATGGAGAGTTGTTCGGCCCTCGCCAGCCTGTCGTCGCCGCCACTC
CAACGCCCGCCCTCAAGCCCGCCGCCGCCATCGTGGCCCTCGCCTGGTGCTGCTCCAGTG
CCCGCCCATACGCCGGCCACCGTCCACCACCACCGCCACTTCGGCACGCGCCCATTGCCT
TCTCAGCCACCCCATCAACGGTGAGGGACTCTCTCTCTCTCTCTCTCTCTCTCTCTCCCC
AATCTCCTTTTCTTGCTCGCAAGGGACTGCGACTGGTGATGATGGCAGCGGGACGGAGCT
CAGCGAGGGTGCTCTAGTGGACGCCATTGAGGCAGCCGGCGCCGGCGCCGATAGCCTTGC
CGTGTCAAGCTCGAAATGAGAGACAGAGAGAGATGGGTGAAGGGATAAACTGACATGTGG
GCCCTACCTGTCAGTGGGTCCCGCAATTTTTTTTGTGTAATTGACAAATTGGTCCCACGT
ACTTTTTTAATTCTAATGCCACTTAAGCGCCACGTTAACGCCACGTGTAAAGAAGACCCG
GTCAATACTGCCACATAGGCGCCACGTCAATAAAACCGCCTAGGGAATCAAATTGCACCG
GTTTCAATAGTTCGGTGGTCGAGATATCCGGTTTTGTAGTTTAGGTTGATGAATTAGATT
CAGGTCACTTTTAAGGGAGTCAAAGTGAACTTATTCCTTCACGGGATAGGAAGGGCATTG
GATGCTGGCCCATGAGCAGAAACAGATCGAGGGATAGGAGGAGATATCGTGACAGATAAA
CAGCAGGCAACGGGACGAAGAAAGAAAGAAAAAGGAGAAAGAGAGGAAAAAGAAAAGAAC
AGGAACTTTTTTTAGAAAAGTCTAAATTTGAAGGATTTGGAATTTTGGACATTTTAAGAA
TGTTGGGGAAATTTTCTGGATTAGCAATTTTATGAGATTTTAGGAATTTAGCTCCACTTC
CAAAAGGCAAATAAAAATCAAATAACTCCAATCAACAAATGATAAAATAAAAGTGTGGCA
TAATTAATAATTTATTTAGTCAAATTAAACCCTTTTCATTTATGAAATTTTTATTAAGCT
ATTTTAGGCGAATAAATATGAATGTAAAATTTTCAAATCAAGCAAATTAGAAAACACGAA
AAATGTGATGTGACATTGTTCCACAATATGTCATTGAGCTAAGCCTTTTTTTTAGAAAAA
AAAAACACTATTATACACATACAATGTTAAGAATTGATTTATCCCATTGGAAGTTTAAAA
AATATATCATTTTTTATTTAGCCTCCTTACACAACTTGGAAGTTTGCGCACAAGTTTCAT
GTTTTTAGAAAAGTAGTTAAAAATATTTTGTGTTGGATATGAAATATTATTTGCATTAAA
AACAACAATTTGAAAGTATTATGTATAGCATATAATGGATGAATTATATTTGAAAAACAG
AATGTAGAAATTTTAAAACCTATACAGAAACTTTTATATTGTGTAAAGATACTACACAAA
TGTTTCATAATTTTTTGGAAACTTCTAAATGGATAAACCTATTGTTAACCTTGTACATTT
GTAAGGATATTTTTGGTAATTTTGAAGAAAAAATCAGCCTAATGACATATTTTAGAACAA
TTGATATACTCACTGGTATATTATGAAAAAAAGATAATGTCAATAGCAAATAGCAAATCG
TTAAACTATGATAAACTCAGTGACATGGAGCAAATTCTCTCAATATATATGACTTAAAAT
ATAGCATGTTTGACAACATGATAAATTACATGAAAAATATTAATTCCAAAAAGAAAAGAC
CGTATTTGTAACAATTTGTTATTTCTAGCGTCCATTAATAAAAATGTATTATGTCTTAAT
TGAAAGAGTTTTCATCATGTCTTTCAGTCACCAATTTGTCACTAGTGGGCCCACATCAAA
CCATAGTTAGTGGCAAGGTAGTCCTACGAAGTAATTAACATATCATTTTGAATGCAAGAA
ATGCCACCCTTTGGCTATGGCGATAGTCTGATTCATCGTGTTGCAAAAAGAACAAGTAAC
TTTTTCCAAGTGAATTCACTGATGAACAAGTTAATTTTTATATGCTGAGCTAGCTGTACA
ATTTTTTGTTTCCGGTAGACCATCAGCACTTCAGCAGCAAGCTACTTCTAGCTAGGTGAG
TTGGTTGGTGGGTGCAGATAGTGTTGGATGCAGGAGACGAGATCTTTCCGTCCAGGTGGC
ATCAGCGGATTGGTGGAGTGGACGGGGAGGAGATTCCGCGCCATACCCATATCCAGTCGC
GGGGGCGCGGCGGCCAATTGTGTGGCGCGGACGTGGCGCGCCGCGCGTCCACCAGTCCAC
CGCTCCGCCACTCGTACGCCGTATAAAGATCTCCCCTCCCGCGCCGCCCATCTCCACCAC
>Os04g0234600|Os04g0234600	Os04g0234600; upstream from -3000 to -1; size: 3000; feature type:gene; location: Oryza_sativa.IRGSP-1.0.46:4:9077889:9080888:R
TTCCATGCAGCAAGCCGAAAAACATCCATAAAATATGAACCTCCAAAAGAGATTTTTTTT
TCGCTGTTGAACCATCCCATGGATCTCCTGGTTTAGGTTCCAATGAAAACTAATCTTTGT
CCAACAGTTCTGACTGAACTCACTAAAAAAAAAAGAGGTGTTATCCGGTCTATCTAGTAT
CAGGCTGGCACAAAAGGAGCAATTAATAGTTACATTTGGAGGCTTACATTTCTTCTTATC
AGGTAGTAGGTCCCTACTCCCTAGTATTAATTGATTATGTCCATCAACAATAACCATATA
TGTGAAAACCTTTATTTTCATAATTACTGAGTTTGTAGAACTCACTTTAGAGCTTGTAGA
ACTCACACTTTAGAGCTTATATAAGTCCATATAGCATCTTTGCTGGACAAAGTGAATGGT
ACCAATTCCCAATTCATGTTATTGTATTCATCATGAGCCTGCACAGATAGAGGAATTGGT
CTTGAACCTGTCTTGTCATGAACTGCTGGATAGAATCATCTTTATGTCTCACAAAGGAAA
ACATTTTTGGATATGCTTGTGCCCTAACTTGGCCTTCCCACAAGTCCACCCAGAACAAAA
CAGAACTTATGCTGCGTTTGGAGATCTGGAGGGGAACTCTTCCCCTCCGCACGAAAAACG
GAGTGGTCCATTAACGCGTGATAAATTAAGTATTAGTTATTTTTTAAAAAAAATGAATTA
ATTTGATTTTTTAGCAACTTTCGTATAGGAACTTTTTGCAAATAACACACCGTTTAGCAG
TTTGAAAAGCGTGCGCACGGAAAACGAGGGAGAAGGGTTGGGAACCCTGAGTAGCAAACA
TACCCTTACTGTGTCCACAATAGGTTTAGTCATGCCTTTGAAAATGATATCAAATTGCGT
TATATCTTTCCACCAAATTCGACCACATAATCTGGCAGCATGTGGAACTGAAGAGGAGTA
ATATGTAGTCCAAATCAAATTCACCGAAGGATAAGGGCATTTGTAATTGAACTTGTACAA
ATGTTTGGGTAATAAAGCTTTGTTCTGTACCCTGAGATCAATGATTCCCATTGTAACTTT
TTTCATAGGCTTACAAACCTTTTCCCAAGCTACAAGTGATCCACTACATTGACCTTGATT
GAAAAACTCTCCAAATGAAAGCTCATACATGCTGAAATCTTACTCCTCACCTCATCAGAA
GGGAAATTAATGAGACCAATTCCAATAAGGATACTGGTTCACCTTCACCTTGCATATCCC
AATTCAAACCAACAAATAAGTGTCTCAGATATGTAACCACCTTCTGGATAGAAGCCTCAC
CATGATTCACTATTAGGATCCCCCTCACTCAAGTTCTAGCTAACTCAACCTCTAAAATAT
CAATGTGCAAACTATAGAAACCTTGACGAGGAATCCCAAATCCACACTGTTTAACATCTC
TTTTCATCATATTTTCATCAGACAGTGTAATGAGATGCCCAGTATTGTGACATGTATAGC
AAAGGGGTGGGCTAGGGCATGTTGAGTGGTGGTGGCCATCACGGCTACATTTGAAGCAAT
TGATCGCCGATTTCGTCGCACCCATGCCTGGCTCCATCTCTTACTAATCCCGTTTGTTCG
ATCCAGTGCTGGACACTCCTAGTTGGGACACCATTCATCGCACGCACCTAGGTTTGCCCT
GGATTTTGAGCCAACAGTTGCTGATGCAGCTCCTCCTCCTCCCACATTTGGAGATTCCGC
CCATTGCAGCTGCCTTGCTCCACAACCCCTGTCTTATTCGCTTGCCAAGGTTTCTTTAGT
TTGTTATGAATGTCCGGTCCCCAGCATCTCATCCTCATGAACGTCCCTTGAAACTATAAT
GCCATCTGGCATGTGAAACTTTCCATGCCTTCCAAGTAAGAGGAAGTTAGGTGGTAAAAA
TAAATGAGTGGTTAGTTTGTGTCATAGTGTGTCTTATACTCATTCAGGCTGCTATGTTCA
ACTCATTCTGTATGGTTTATGAAAAATCCAACTCATAGTACATCCTAATGATATATGTTC
ATAAAAAAAATAATCTCTACCCCTATACAGTTCAATCTCCAAAATTGTGAATGCTGTCTG
TTCAACGAAACAGCAGATCTCTGATTGTTCAATGAAAAAGCAGCAACGGCGATGAGGTAT
CCACCACTCCACCAGACACAGAAGCTCGACGGCAGTAGAGTGCTCTGAATCGAGGACGCC
GGTTCCACTTCCAGGTCGGCAACGACACAGCGGAACTGATCCCTCTCTTTCCATCTCCCT
CACAGCGGACCTGCTTCTTCGATTTGCTCATGGAGAATGTCGACGGCGTGCTCTTGGTCT
GTCTGTGGCAACAAGCTCCGAATCGGGGTCTACAGCTGGCATGGTACGGATCGAACTCGT
CAGCGATGGTCTGCTCCTGGCCGAGCTCGCTGACGGCTGCGTTGGCGGTTGTGTGCGATG
CTCTGCTCTCCAGTCCAAGTGCGGATCTAACATGCGGGCCCGACTGTCTGCTGCTTCACA
TGTGGTTGTGTTTGCAACCCCATGTTCCCAACCCCTCTCCCTCATTTTCCACGCGTATGC
TTTTCAAACTATTAAACGGCGTGGTTTTTGCAAAAAAAAATTTATACGAAAGTTGCTTAA
AAAATCAAATTAATCTATTCTTGAAAAATAAATAGCTAATACTTAATTAATCATGTGTTA
AAAGGCTGCTCCGTTTTGCGTGCAGGAGGATGGGTTCAAATCCTGCACTTGCGAATTAAC
ACACCCCTACACAGCACAGTGTGTGAAGTGTACCCATCCCCCGACCTAAACTGCAAATGG
CACTGTGTTGCTGATGCTACGGACGAACCCAATAGATAGTAGTCCAGTTTACAGTTGCTG
AACTTGTGATCAGACCTGAGCGGTTGAGCGATCCTCCCCGCAGGGCCACACAAACCACGG
ATGGTCGTGGTGCATCCATGACGCTCTATCTTCTCCAGCGCCACATGGCTTCACCCCGTC
>Os10g0502400|HEMA1	Os10g0502400; upstream from -3000 to -1; size: 3000; feature type:gene; location: Oryza_sativa.IRGSP-1.0.46:10:19162399:19165398:R
CCACTGATGAAATCCGATGTCAAACATGTTATCTGCTGATGCCCAGACATATATGTTTTC
TAACACGCTTAAAATACTTTTGTTGTTCTAGGCACCAGCATGGCCTTCTTCTAACAGTTA
ATAGCCATCAACCGTGCAAGGTTGTTACTTGTTACCACTACAACACAATTACGTAGCAGT
AACAGATGTAAGATTTTTCCTCCTTTTTTTTTTCTGAATTGAAAGATGGATGTAAGATGT
TTTGCCATGTGAAGTCTTCAGGTAACCTAAGAATAAAAGATTTAGCAAAATTGCAGTCAA
AGCCAAGCCTCACCAGGTCACCCACTCACCACACGGAAGAGTCTTGTTGACGAGTAGGGA
TCTTCTGTGGCATGATCATCTCCTTTGTTTGCTTGAAACGGTCGCATCGTAAGCAGCCAG
CAAGTAGCAGAGAATGAGTCATTGTGCACATAAGATCCCAGCTTTGACAGATTAAGCGTC
CAACTAAAACGTGCAGGAAAACAGCCGTATACACACCAGCACGATGTCAAACGCCATAGA
AAATTAGTATTGTTTAGGAAGGTTCAACTCTGGTTCTTCTAATCTGCAGTGTGTAAACTG
AGCTGCCACCTTTGATGCTCCTCATTTCTTTTTGAGAATGTTTCCCGGTCAACTACGGTT
CATGCATGCAATTGATGCAATCTCAGTCCTGTCTAACTGAAATATTCTTTGTTCTTAAAA
AGGAGTGTATTCATAATCACCGCTCAGTTCTTACAATTATTGGTACCATTAGATCCCAAC
TAGATTACCTCTAATTAATTAAGTTCAGAAGTAATATAGTTTCTTTAAAGCAAAGGCAAG
AATAAATTTTAAAAAATAATGCAGACTGAATACTCCTTTTTTAAAAAAACTTACTGAGAG
TGTGTTTAGTTCGCGCTAAAATTGGAAGTTTAGTTAAAATTGTAACGATGTGACGGAAAA
GTTAAAAGTTTGTGTGTAGAAAAGTTTTGATACGATGAAAAGGTTGAAAGTTTTTTTAAA
AAAATTTGGAACTAAACTCGGCCTGAATACTGCATGTTGAACAACTTTCTCCCCGACACT
GAACAAACAGGGCAATGCTGCAATGTTAATTTCGAAAGGGAAACTACATTTTGGCAGGAT
GGTTCTTCCATGGCCGGCAATGACGGGAGCTTTGGCTTGATGTCGCCATTTCCACGCACA
CTATGTTCCAAAATGTGAGTCCAATAGCAACGGCGCGAGAAAGGAACATTGCAAAGATGC
AACCGTGTTCTTTGCTCTCATCAGAGAGAGAAACGCTCCATTTGTTTATCAAAAACCATT
TTGCTAAAGCAAAACCACTTGGGTATTAGTAAATTTTAGAGAATGATTCATAGCTTGTCG
TGCCTCAAAATCTTCGAATATGCGTCGCATTATTATCGATTAGTACTCATCTTCAACATG
ATTAAAGAAATCCAAAATAGACCCAAGCAATTACAAAATAAAATGAAACCAAGATACTTA
AACCGAGTTCTAAAATGGGGTTGGAATCAATCCCTCTACCACGATTTCCGAACTGTTAAA
AGATGTATTTCGTGATATTTTTTACATATTTTTGAAATAAATAAATAAATCTCTATAGTT
TATAATACTAGTTAATGCTCAACTAATCATAAATTAATGACTTATCCTTTTTTTCAAGCC
TAAGGATGAGTTCTATTCTTCTCTTTCCCAATTCACCTTTCTCTTTTTTCGCATACACGT
TTTTCATACTACTAAACATTGTATTTTTTCAAAAAAAATTATAACAAAAGTTGTTTCAAA
AATATATTAATATAATTTAAAATTATTTATACTTAATTAATTATACATTGATAAACCACC
ACGTTTTCTAAAATCAGCATGAGACCCTTGACCGACATGTGGGCCCACAAGGTCAGGAGA
GTGTGGCCACCACGTCGACACGCTGGGGCCGTCGGCCACAGGAGGTGGACGTGCGGAGGC
CATGGGAGCTGCGTGTGCCCACCTCGCATGCTCAAAATTTGATGGCTGCAATTCGCGAAT
GGGTTTTCTTTCAGAGATGAGAAAAAGCGAAGAGAGAGATAAGGGTAGAGGATAGAATGT
GGCAGCTGCAGCCAATCAGAGGCCAGAGGCCACCACACTCCCCCTACCCTCTCATCCCTT
CCCCCCACCCCCCACCAAACCCAACATGGCCATGGGATTCATAAACATTTTGGAAATCTT
GGGATAGTCACCTTTTGTTTTTGGGGCTTGTAGTTTTTGGAAATTTGGGGGAGGTCCAAC
TCTTGCTCCTTTTTTTTTTCTTTTACAACACCGTGTTTAGTTCCAAAGTTTTTCTTCAAA
CTTCCAACTTTTCCATCACATCAAAACTTTCCTACACACATAAACTTCTAACTTTTCTGT
CACATCGTTCCAATTTCAACCAAACTTCCAATTTTGATGTGAACTAAACACATCCCAAGT
TTGAATGTGAAGGTGAGGTCACCACGTAATGAGTATTTACTCGCATTTCGCTCTTTGGGG
ACCCATAAGATAAAAACTTAAAGCAAAATACGATAAGTTCAATCTTTCCTAGTTCCCACA
TGCTGCTAAATTTTCTCGGAAATTTTTATTGTATAAACTTATGACAAACGGTGACATGCT
GGAACGTGATATCATCTGAATCCAATCAAGACAATAAACTTCTAACCAAATTTGATCAAT
CTCCTGGTGAAAGAAATCTCTTCATAGATCTCCTGATGAAAGAATTTAACACTGAAAGAA
AAACAAGAGATTCACAAGAGCTTGAGACAAAGTTACAAATTCCCCCCTAACACAGGGGCC
TCTGAACAAAACTAATTTTGCAATAGAAAAATTCAGAGCCGGCAGTAGACCGAGCCAATG
CATCCCACTGTTGCGTGGGCCCCACACGCCATGGCCTAACCACCCCTCCTCTTCATCCCC
CCATAACCTCTCGCTCCAAAGCTCCAACCTTTTCCTCCTCTTGACCAAGCCAAGAACACC
>Os04g0459500|Os04g0459500	Os04g0459500; upstream from -3000 to -1; size: 3000; feature type:gene; location: Oryza_sativa.IRGSP-1.0.46:4:22934162:22937161:D
CTGCTCTCCTCGTCGCGGCACCGCTTGAATCCGCCGCCCAGCTCTTTGATGCCGTCGTCG
CCGCTCCATCTCTTATTGCCACCGCTCAACCTCAGCTTTATGGGAAGGAGAGGATGATTG
TGGGCCCCATAATAATTTTTTTAATGATAAATAGGTCACATATGACTTTTAAATTCTAAT
ACCATATCAATACCATATTGAACGAAGACCAGGTCAACACCTTCACATCAGCTGAAACTG
TCATCCAAACTATCGAGGAAGTCAAATTATACCGGTTTTAATAGTTGGATGGTTGAGAAA
TCTGGTATTGTGGTTAGATATACGAATTAGATTCAGCCGCTTAACTAGTGAAAAACATAT
ATGTGGACTCGTTCGTCATTCACACAACAAAAAATTTAGGCTCACTGACATGTGGGGCCG
ACATGTCATCCCCCCTCTCTCATCCTTCCTTCTCCCTCCCTCTCTGTTTCTCTTCCTCTC
CCCTTCGGCAGCGAGCGGGCGAGAGCCGGAGCGGCGACACCATCTCTCCGGCCCTCACCC
CTCCGGAGATGGAGGAGGTGTCGTGGCCGGCGAAGAGGGTGACCATGGCGGTGTCGATGA
TCCCCTCTTTGGTCAGCAGCGACCCGCCGCTGTTCAATGCCGCCACGTAGGCGCCACGTC
AACGAAACTGCCCTTCAAAACCGCTGAGGGAGTCAAATTGCACTGGTTTTAATAGTTGGG
GGTCGAGATATCCGGTATCGTGGTTCAGGGATATGAATTAGATTCGACCACTAGTTAAGG
GAGCCTAAGTGAACTTATTTCCCTGGACAAACCTATGTCCGGCTCGTCTCAGTTTGGATT
GTGTGGGTCATCTAGATGGGCTTTGTATTGCTAGGAAGGAGATAAGAGCCCGTTTAGATG
GAGGAGCCCACAATAATCTCTTTAAGCTAACATGAAGTCCTAGTATAAGGTTTGGCTAGG
AAAATCAGAGCCAAACTTTAGCTAGCAATAAGTAAGGGACAAAACCGTCACATTTCCTCT
TGTATCATTGTTGTGAGGAAGGTGCCAAGAAAACATACAATTGTCACAAGTATTGCCGTG
GTACCTAATACAATCATAGCTCTGATTGGTTCAGCCACGAGTGACAGGCTATAAAAAAAT
ATAAATGAAGAAACCAGCAAAGTTTGTGATTTAAAAGTTAAGGTTGAAAGATAGACTATG
AATAAGAAACCCCAAATCAACCTGGAACTAAAATTAAGTTTTAAAACTTAAATTTTAACT
GTGAATGACAGTTAAAATTTTAACTTCACTATACCACTCAGCGTGTGAATTGCCACAATG
AATAAAAACCGTTGCAATTTTGTGCTAATTAAAACATAAAGTGAACAATTTAGACGCAAA
CTATATCGATCTGTTTTTAAAGTTCAGTTTATAAGATAGAAATTTTACCAAGTAGGTCCT
ATTTCACTATTTTTATAGAATTGAAGATTAAAAACTGTCCGGAAGAGAATGACAGTAGCA
GGGCGTGTGATGGTTAAGTCGTGAACATTGAAGTCGTCCGGAAGAGAATGGTGGAGCAGT
ATGCGATGGTGGAGTCGTGGGAAGGGAGGATATTGAGCTAGCTTAGTGCGTTTGGGTTTG
TTATCTTAACTCGGTTTGGTAACCTTAACGATCTAAAAGCATAACTCAGCTTGGCTCGAC
TCACAACTTGACTCGTTAACGAGTTCTCTCATTAATATCACATTTGCATCTTTGAATTGA
TTTACCAATTTATCATATATTAATATAATGAATAAACACCAAATGATAAATAACTCATTG
AATCCAAATAATTTATAAGCAATTAATGGACTAATGTACTTATGTATAAAATGTATAAAA
ATATATATTGACCTCATGGCCTAGCAAGCTACACAAGTAGCTAACGGTATATCTTATTAA
GCTAATGAGCTAAAAACCTAGCTCGACTCAATATACTATGGCTATGAGTTCAAGCCGTTC
GAAACCATCGGCTTTTTTTTTAACCGCTAGTCATGAGTTCAGTGCATGGCTAGCGCATAT
CCCACACCACATGTGCGGGTGTGTTTTTAATAGGAATTTAGTAATGTTGAGAGGATTTAT
CATCTATCTTTCTTTTTCTTAAACGTGTGTTAGAGATCTACCCGCAAATGTGTAACTATA
GTGTATGTGCACAATGCACAGTGCACGTGTGTTTTCTGTGTAACAGGGGGAAAAAAGAAA
GAAAAAGAACGGCAGCGGCAACGTGGGCGCCCAACGAAATCTGAATTTCTGAACATCCCG
GAACGTAAGAACAGCGCTACGTTGGCCGAGACCGGAGAGCGACGTGGATGTTAAGCTTAC
TCCAGGCCTCAGAAAAACAAGAGGATCCGGGAGACTGAACTGATGATGGACCGGGGGCGA
GGGCCACCGCAAGATGCATTGCAGCAGGCGCGAGCCCGCATGGCCACATCTCGCAAATCC
TCGCTTCCCCTCCCCCTCGCCCATCGTTTACCGACGCAATCTGCCAATCTCGCATTCGCA
AGAGCTGTACCGCTCGGTCCACGAGCAGCCAACCTTGGCATTTTTACCTCCGAAAGCGAG
CTCGACCTCCTCAAGAATGACAGAATCGAACGCCGAATATCCATCAGCTGCGTAGCCATC
ACCGCCTGCGTCGCAGAGAGGGCCTCCCATGCAGTACCGCGTACAATATCACGTACTACC
TGAAAGGCTGGAACGCTCAGTTCTTCACCGCGACAAGAATCACCGAGGGGAAAAAGAAAA
AACGGCGGACACATAATGGATGGAGCAGCTGAACTTTGAGATGTGTGTGACACACATGTG
TTTGTGTGGGTGACGCGATGGCTGTGCGAGAACGCTGGGAGCCATACGTTGGGCTATCCG
AAATCTCATCTCTCGCCCAATCCGGGCCTCACGATGACACCTCGCTGCACCGCGCACCAC
AAACCCCTGGCGCGCCCAATCCCACACTCATATATACACACTTCCCGGCCTCGCCGTCCT
>Os08g0104600|Fd1	Os08g0104600; upstream from -3000 to -1; size: 3000; feature type:gene; location: Oryza_sativa.IRGSP-1.0.46:8:242629:245628:R
TGTTGTAGGTGGGTAGTCTTATATATACCCCGTGTAATATAAATTTATCATAATTGATGT
CTCAAGTTAAACTCTAAAAACTCTAAACATGTTTATTTTTCCAATATTAGAAAGTTGCAT
GTGGTAAATATGTCATGAAAAATACTTTGATAGTATTATAATATTGTTGGTTTTAAAATG
TTTTGCTTTTAATTAGGTACAAATTACTCCCTTTGTCCTCGGAGGTAGTAGTAGTCAATG
TTATATTTTCAAACAATATAGATGCGGCATTCAGAGTACATGCATGTTTTGTGACAAAGG
GGAGTAAAAAAACCACGAGATCAGCACTTGAAATACTAGAGACACAGAGAGAATTTTCAA
CAAAAAAAATCAGCAATTTTAAACGTGGTTTCTTCTTTAAAAGTGATGAAGATTAATCTT
GTCGGATAAAAGAAGGCAACTGGATCACACACGCGAAGAGAGAGAATACAAAACGAAGAA
ACGTGCATGGTACGTGTTGGCATATACTCCGTATATATCCTGGGAGTAGTGCCGGGCAAC
AAAAAGGGTAGGCCGCAGGCAAAGCACGAACTGATCGATGAATTGCTTACAAGCAAAGTG
AAATGATTAAAAGCAACAATTAAAATTAATCAGTTTGGCTAGTACAATAAAAAAATCTCA
TATATAGCTCATTGGTTAATTGCTTAATTATTGGTTGAGATTGGAATTTGGATAGGGCCG
GGTGGGAAGCATATGCTTAGTCATTATTAGTATATTGATTAATGAAATAGGAAAATAGAA
CAGTAGTGGCTACCGGAAGAATAGAAAACATTAGAACATGCATGCTGGTCAAACTATAGA
TAGGAAACATTCGCGCATCCCTGGTTTGACCGTGTCGGTACGTTTGGATGTCGATCGGAT
CCGAGCAATCTTCACGCGACCGTACCTAGGCCTGGTTTAGTTCCTAATTTTTTCTTCAAA
ATTTTAACTTTTTTATCACATCAAAACTTTTCTACATACATAAACTTTCAACTTTTCAGT
CACATCATTACAATTTCAATTAAACTTATAATTTTAGCGTGAACTAAACACACCCAGCTA
CAATTTAATTTCACTAATGAAATATAATCCATGTTTGATTTTTCTTTTTTTTTTCAATTG
TGCAATAAACGTACATACACCACCATACATGCAACACCACACTCGTACACCCGAGAATGC
ATCCCCTAACATGTACTAAAAAGACAGAAACCAATAGCACATCTCGATCTGATCTCACTC
AAATCATGGTACAAGCTTCACTTGCATATTTGCTAAGTATTCATGGACATATTTGCTAAA
GATATGCATCCACGACTTTATCATCACATTACTATACGTCAATACCAGTGGTGCTTTCCC
GATGTTTTCTTTCTTTTCGGTTGTAAATCTTTTTTTTTCTCTCACTCCATATATCAATCT
GTCTATTAATTGTTAGATATGTGTGTTTTTTTCCTCCCTAGGGAATCTGTGTAGCTAGTC
ATTTTCTTAATCAATTGCTATTAATTTGCTAATAATGCACGGATATGTATTACGTCCCAA
CAAGCTAGGGCCAAGGCATGCATGTGAGTCAGCTAGCTGTGGAGAGTTTTTCTTTTGTTA
CGATACAATGTACTAGTTACACACACATATACTATCAGTATAAATGATTCAAAATATTTA
AATTGGTTTGTTGTTTGACTTAAATAGAATGTAATATAAAATTGAATGAGGTAAAATTGT
CTTTTAGTCCTACCACATGAAGGGCGATTCGATTGCATGCGGATGATCAATATTCATATC
GGGGTATATATATGTGAACATGTGATGGATGCTTGACATGCATATATGTGCAGCAGTTGA
TACTACTCCAGTTATCTCGATCTACTAATTGATCAATCAATTATTGTTCCGCTTACACAT
ACACGTATATATGTGTGTGTACAACGTGTTTGTTCACTGATAGTGTCGTGTGAGGATCAA
AAGGACCACGTAACCAACACGTGGCCGGCCGGCCAGTAGCAATATATATATATAGAGTAG
AACTTAAAGAGTTGAAAATATCATGTACAATCATCGATCATGCGTATATATTCCTGCATG
CATATAGAGTTGGATCGATCGAATTCGATCAGCACATGAACTACTCTCTTGTTATACATC
CACTCATATTTTTATACTCAATCACTCCTGTATGTACCTGCTGCCTGCTGCAGGTTCCAT
CGTGTCCTAGAAGTAGATGAGATGGATGTTCCTGTCAACAAACAAGCCCAATAAGAGACA
AGATGGGCTGGTCATCGCATCCAGTGTTCTATGGGCCGTATCTTGGAATCGGGTACGGCT
ATGCGGATTGGGCCGGCCCATTTACATGGAATATCATATAAGCGTGCATGTGATCGTACA
AAGCAAAAGTTTTGGCCTGGCCCTCAAAAAAGAGAGAAGAAAAACAGAGAGGTTAGGTTA
GTTTGGAGAAAGTTCCTAGCCAGGAACAGGAAGGAAGAAGGCACATGCAGCAGTTCAAAA
TTATTAGAGGCTGCACATCGCACTCTATCTTGTGCAAGACTCGTGACCATCAAATCCCAA
TCTAACAATTGTGATTCAACGTATGTGTGGACAACATATATACATAGCAAAAGAAATTAA
AGAAAATGTGTGTGACCACACATACATCTTGTTCAATTATTTTTCTCGTGAAAAACAAAA
TCAATGGACGGCCATGGGAAAAAGAGATACCAGATCTGAATCCTGGAGGTACATGTGATT
GGCTCACAAATTATTTTTTTTAAAAAAAAAAGCTCAAAAGAAGTTAAGGTGTGAAGAAGA
AAACAAAAAAGAAAAGCGAGGCGACCACACGCAAGACGGCCGGACAGCATCGGCGATGTG
CATCGTGTGGTGGTCGTTGCCCCATCCACTCCCCCGCAGATAAGCCAACCAGTCGCCGCT
CGCCACGTGGCACCCTCCACCTCCCTTCTTATTGCCTCAGCCTCCTTCAACCTCACGCTC
>Os03g0850400|Os03g0850400	Os03g0850400; upstream from -3000 to -1; size: 3000; feature type:gene; location: Oryza_sativa.IRGSP-1.0.46:3:35787044:35790043:D
AGGCTCGACCAGTTCACGTGGTCCTGGCCGGCCTGAAAAAAACAAACCTGTTGATTTTGA
TTGGATTTTGATATGATCAGACGTCCTGTACCCGGAACTGGGACTCGGAAAATCTGGGCG
TCGTTGGTCATTGCCTTGCTGTTTGGGCGCAAGAGAATGGATGGATATTTCTGAAACAAA
CAACGGGTGTGTGCAAGAGAATATCTGAAGATCACTCGCCTTCCTGTGGCCACTAGTAAT
TCGGTGCTACAGTTTCTCTTCCCATCGATCATATGCACAGTGCATGGAAATGACCTCAAT
GCATGAATGATGCCATTGGCACAGAACACTGTCGAACCAAAAACAGTCGATCCATCCACT
GATTGATCTGGGCCAATGTACCTTTCAACCAAATCTATCACTCTCTAATTGCCTGTCCTT
TTCTCTCAAGGCTAAATAAATTATACCGTTGTTTTCTCTTTTACTAGTTGGCATCAGCAT
GAATCAGTTTATACATTATATTATATAGAATACATGAGTATCTTTCGGCACCAGGAATCG
CAGATGAGCTTCTTACATAAAGCATAAGACCAGTATTGGGTCTTTTTGCCCGTCAGACAA
GTCCACTCTTGCTTCTTGTATGCATGAAGAATGGAAAATACTGCAGCTCAGCTGGCATGT
TCCAAGCAGGTCAGGCCTAACAGTTTGCACACGAATTTTGACCAGAAATAATCCACAAGT
CCAGCTCCAACCAGCATCCAGATTCAGATGACGCAGTTGCAGAAAAAAGATCGAATTCAA
TATGGAAGGATTCTTTTCAGAGTCCACAATATGTACAAGTGTTCTGTGTTCACTTGTTCA
GTCTCAACCATTCATAAAGAGATACTAACAGAGTTCAAGTTCTTGTTGCATACATCTTCC
AAGTGCCAATAGTTTATTTATTCACGATTCACGGTTGTCTGTTCACTGTTTTGTCCCTTG
ATTCTTCTTTTATTTGACGAGTGCGCCATGGTGTAAGCATGAATGCGTTGCGTATTCAGA
GAAAGTGAATCTGAATTTTCTGTTGATCAAGTAACAAAGAGGAAGACACCATCACACCAC
GCTCTACTTGCTGGGTTCAGAGAACCATGAAACTTTCAGAGTGGGAGTAGACTCAGAAAT
CAATTCCTTTATATATTTCGGGCTTGTTCACATTGATGCCAAAAAAAACCTTATCAAATT
TTGGTAAATTTTGGCAATTTGCCAAAATTTTGGCAGGATTTCTTATATAGTTACCAAAAT
TTGGCAGGAAACTAAATATAGCCACTTTTTTGGCAACTTTACCAAAATTTGGTAAGGTTG
AAAATAACATCAAAGTGAACAGGCCCTTCAGCTAATAAAACTCCTACGCTGTATATATTT
TTTCCAATGCTATGAAACTCTGAAGCTTGAGATGAATGTTCAGAGAAAAAGAAAATGGCA
AGACGGTTATAAAGTGTGCCTTTTGAAAAGTTTATCTATAAATCCATTTTTGGGTGAGGG
GCAGTTGCTAAAGACGGATCTTTGTTGGATTCTTTTTTTAACCAGCTGACTTGATTTCCA
CTGAGCATTTTGTCCTCCTATGAGCACCTCATGCATCAATATTGCATGTTTGCACCGTTG
CGATTTTTTATTTCTCTTTATTTTGTTTGCTTAAGCCGATGCATGAAGGATGCAATTTGT
CAGTGAAAATCAGGTAAGAAGAATTTGACAATCGTATGGCCAGAATTTTTCAAAAGAAGA
AGAAGAAGAAGAAGAAGAAGAAGATTTTTATTTCATTATATCCACAGTGTATCTATTGTT
GTTTTGTTGTCTTCTTCCAATTCAATCAGTATCACATAAAACCAAAAAAAAAAGACTGAA
AGTGGCAGGTTTTTAGATTTTCGTTTGGTGCATTCGTCGATAGTATATATGGGTATCATT
TCTTCATAAAAAGATGGAAACAGTTTATTGTCTGCAAGTGATATGTGCTTGTCAGCTTTC
CTGCTGATTATAACAAATAACAGTTACATTGTTGGGTGACTGATCAGCCTGATCTACCCT
GCAATTCAGCAATCCACACAACTCTAAACATGAAGAAAAACATTGGCACTAGTAACAAGA
TCACCATAGCATAAGGCCCAGTTTAGTTCACAAATTTTTTTCTCAAAAACATCACATCAA
ATCTTTGGACACATACATGGAGCATCAAATATAGATAAAAATAAAAACTAATTAGACAGT
TAGGGAAGAAATAGCGAGACGAATCTTTTGAGTCTAATTAGTCTATGATTAGCCATAAGT
ACTATAGTAACCTGCATGTGTTAATGATGGATTAATTAGGCTCAAAATATTAGTCTCACG
GTTTCCAGACGAGTTATGAAATTAGTTTTTTCATTCATGTCCAAAAACCTCTTCCGACAT
CCGGTTAAACATCCGATACGACACCCCAAAATTTTTTCTTTTCCCCAATTAAACATGCCC
TAAATTAACTAGAAAACATACTCCTGAGATCGAGCAAGTATTTACTGAAGCCATGCCAAT
GCTTAAAAAAAGATGTAGCCATGAATCATGCCAAAGAAAATGTAGTACTACTAATAAGCT
TAGATCAAAATCAACTTTAGTTTAGTTTCTAGAGAGAAAAATAAAAAATGGTTAACCAAT
CATATTCATGGTGGCAATGTTGGAGTGGGACGTAGGAATCGCAAGCAGTGTTCCCATCGA
CATACAGAGACAGCCGGTGGATTCCAAAACAAAACCGGCGCGAGGTGAAGACCCCACCAC
ACACGTCGCTTCCAGGTGGGCCCTCCCATCCGCCCACCCCCACTCGCGTCGCGGCGTCCC
CCCGCCCACCTTTCGCTCGCCCATTTTTCTGCGTCCCGGCGGCGGTGGGGCCCCGCGTCT
CGATCGCCGTCGGAGTTTGATCCACGCCGTCCACTGGCCGCGTAAACCCAACGGCCCGCC
TCTCCCCGCCGTCCGTTTCCCCTCCCCCTATATAACCCCCTCCTCCCCACTCCAACCTCC
>Os01g0803200|Oc1*	Os01g0803200; upstream from -3000 to -1; size: 3000; feature type:gene; location: Oryza_sativa.IRGSP-1.0.46:1:34030159:34033158:D
TAATCTAATAATAAAAACAGATTGGAACGACAAACCGGTGATGGCAGAGCTGCTGATAAC
GTGTTGTAAACCAACGCGCCTATTAGCGGATCACCGGATCCATTCCCTGTCCCTACCACA
GCAGTAGAGGCGTGAGATGATGTAGAACACCCGCGCCTATTCCTTTGCCCTCAAGAACAT
TGCAGAAGTAGATAATGAACACAGATATAGGGTGGAGCTCTCTCTTCATTATAGATCTCA
TCTGGAGTACAAGCCGAAGTAGACAATGAACACAGATATAGGGTGGAGCTCTCTCTTCAT
TATAGATCTCATCTGGAGTATAAGCCAACCATTAGCCATTAGATGTCACACCCTGTCCCT
GTATATATAGGGGTCTTAGAAAGAAATAGACCTTATCTCTACTCCGGTTCGGATTGGCCT
ACAAAAAACTTATCTCCAAGAGATTTGTTTCACAACAATCGCTGCCAGTCCGGCTGGCTG
CTCCGAATCCTCCGATGTGTATCTCTGCTGTTCGCGCGTACTACTAGGACCATAGGAGTG
CGTGAGTCATCAGTCATGTCGGTATGCAACTATGCAAGCAATCATGATCTAGTTGACCGT
ACAAAAAAGTCGTGATCATGAATCACGTGGTAAGCATAGATTAAATGTTTTGATATATAT
AATACTCTTTTCGTGTCAAAACATTGCAACCTACTATGGAATGTGCAATGGCGGATTTAC
AATTTTTCTTAAGTTTGGGCAAACTTAATAAGAGATAAAATCTAGAGTAAAATACACGGT
CGGTCATTAAACCTAAAGGGTGCGTCATCTAGTTTCTCAAAGTCTCAAAATCACCACAAC
CCTCTAGGAGCTTACATGACGCTGATGTGGCATTTCACATAGACGTGACATAATCTTGAC
TGACAAATTTGACTCGCTTAATTTTTCTTTCTTCTCCTTCTCTCCCCCCTTCTTCTCCTT
CCTCTCAGTGCAACTATAGGCCACCACCGCACGGGGTGCTACAGTCACAGAGAAAGGAGA
AGAAAAGAAAAAAAAGAGAAGAAGAAAAGAAGAAAAAAAGGAAAATTTTTAAGTGTCATA
TTTTTCAGTTAAGATGATGCCACATACATCCGTGTGGTATGCCACATCAGCATACATGGG
AGCATACATGGGATTCTAGAAGGGCTGTGGCGATTTGGGACCTAAATGACACACTTTGAT
AAGTTCTACGATTTGGATCTGTATTTTGAGAGTTTAGAGACATAGATGACACATCCTTAC
AAGTTTAAAGACTGCCTGCGCATTTTATTTTAAAAATATATGTACACAAAACCATAAAAC
CAATAACTTCATAGACCATTTACTCTTTTATTGGGCCTTGCTTTGCTTGTTTGTTAGCAT
ATCATCGAATTAATCTCCATTAGAACCAATAAGCAAGGTAATTAAGTAAACATTTAATGA
GTAATACTCCCTCCGTCCCCTAATATAAGGGATTTTGATAGTTTGCTTGTACTGTTTGAT
CACTCGTCTTATTCAAAAAATTTGTGCAAATATAAAAAATGAAAAGTTGTGCTTAAAGTA
CTTTGGATAATAAAATAAGTCACAAATAAAATAAATAATAATTCCAAAATTTTTTAAATA
AGACGAATGGTCAAACAGTGCAAGCAAAAAATCAAAATCCCTTATATTAGGGGACAGAGG
GAGTAGCTGCTTATGCCTGTGAAGCAATGTGTTGCTGCGCCTATGGATGCATGGAGCTCG
GGCGCCTGCCCGTAGCCCTGGCTCCATCATTGAGGATGTGATATTTTAATACTATAAATT
TAGACGGTCCTACAGATTCGCAGTACTAACATGTGTTACATTTCGTATTATATTTATTCT
TTTACGAGATAAAGAGATACAGTAATAAGAAGTAACATGCACGAGACAACATAGTTATCT
TTTTTTTATTGATATAAAATTTACCTCAATGTTCGTTAACACGATTTTAGAATAACATAG
TGTAAAAACATTAAGTTGCTTTAAAATATTAGATCAATTTAATTTTTAAGTTCAAAATTT
TGAATATTAATTAATTATGTGTTAATGATTCTTTTGTTTTATGTGATACCTAATCTTCAT
CTAATGTGTACTCAAACGGGCCATAGTCCCCATCATCGATGGAGCATAAAAATCGATTAG
TGCGTGTTGCTCTTGTACACGACGTCCCGGGATGAAGTCCGAAACTCCAAACCGTGTGCC
GAAGGTCGAGGTTGTCATGTGGTTTCGTTGTCCTTGCGGTTCAATCAACGTTCCAAGTTC
AACGATCATGTGCATGACAGTGAACCAACGGTTAAGCTTCCAGATGCCTACAAATTAAAT
TGCGTAGCAATGTGGCATGTAGGTAGTAATGGGAAGGAACAATCTTGTTTCAACGCCTAG
AAGATTATTTGAAAAACAAAAAAAAAAGAGAAAAAACTTGTTTCCGATACCAAACTGAAA
TGTCCAAATTGGTGCCGTGCAAGTTCAATGTTGCATAGGTTTGACTCCCCAGAAATTCAA
ACATAATATGCTACATCGTTCTCGTTATCCGGATAACGCGTACTCCCGCGTCGGGTTAAT
GGTCCAAGATGCCGATAACTATACATGGACAAGGTGTCAAGGTTATTCTTTTCAACGATA
TACATGATCAGAGTAGGTGACGTGACGACATGGCCGCACACACCGGCTCTCTAGTCATGG
ACCATCTTGGAGCTCAAAGGCTCAAAGCTCAGCCACATACAGCCAGGCGAAAAAAAAAAT
CGAAAACTTGTCAAATATCTGTAGCAATAACCAATGATATCTCTACTAGTCATCTCAGCG
GCCGGTGGCACGCGAACCGGAGTTATATCAAACAAACACCACCGACGTTGCCATCGTCAC
GGTACCAGACTCCTGCGTTCCACCACTCCACCAGTGACCGTGACGTGATACATGGAGATA
ACGCCGCCTGGCAACTGGCGAGATAATTAAAGAAACCGGGAAACACTGGTTCCAACCGCT
>Os03g0744700|Os03g0744700	Os03g0744700; upstream from -3000 to -1; size: 3000; feature type:gene; location: Oryza_sativa.IRGSP-1.0.46:3:30590512:30593511:D
TGGGACCCACATGTGACTGGACCCACATGTCAGTGACTCAATGTCACCGAGAATGTCACG
GGGCAATGTCACCGAATCCCAATCCTCCATACACATGATCTTAAATTAACCACCTGAATC
TAATATTGTAACTGTTCCCATCAGAATCCAAAGTCCCAACTCTAAACAAGTAGATGAGCA
TCTAGCTTTCCTGCATGTCCTGCTATATATAAATACATAAATATATAGTTTTTCTTTAGG
GAATATATAAGTTAGTACATATAAACCAGTCCCTATTTTTAGTTAAGACACGTTAACGGT
GGTTGAATCCACCATCCCTTTGTGCTTGCAGGGTCCCACAACTAATGCAAGTGGAATAAA
TCATTAGCTAAGCCATCTAGGATGATGAACTCCTTTACACTAGCTAGCATCGATCAACCA
TGTAGAAATGCAGCTTCAGTGGGAGAAGGTGGGAAAGTCTTAGGACAAGAGCGGGAGTCG
CGGAGCGTAAAGCGAGACAGCTAAATGGCAAAGGATTAAGTCAACATCATATTTAGCAAT
CCAAAACCAGCACCGCCTGTGAGACGGTGTCCCTCTGGCCAATCTCAACCCTCCGTCTTA
GCTAGTATGAATAGCATTAAATCCACTGCCACATAAATAAAAATTTGATGTTATAAGAGA
ATTAATAAAAAGAGAGGTAAAAAGATAAATGAAACTATTTCTTATACAAGAAACTATCTC
TATACAGGAATCAGGAATTAAAACAAAGGATATGTAGATAAAAAGAGAGAAAAGCGGTGA
TTAGATAAGAATTTAATTAAAGATACCTTCCATTGGGTATATAATTTATATATATAGTGT
CTATATGACATAGAAATTATGAAAACTAATTAATAGTTTATGGGTTGGGATTACCCTGAC
AGAAGCGCTATGAGGCTACACCCTGGTCTTTTTTCTCAACATTTTAATTATTAGATTATA
GCTTATAAAATTTTTAAAAATACATTGAAAATAAAATAAAATTAAATTACGATTTGTATT
GTGTTTCTAAAAAAGTTGTATTGGAATTTGAGAAAACGAGAGTATTATGGCTTATTTGTT
TTGTATTGATATGTGTGAGATAGATTGGAAATAAACTTATTTGGAGATAAAGGGTGTATG
ATCATGAAACAATTTATAGGTAAAATGGTACTCCATTAGTTAGTGGTTTAAAGTTAATGC
TAAAATATAAATTATGACGATAGATCCTCTAAATTAATTTTAAAATTTTAAATTTCAGCT
ACCGCTAATAACCAAAGGATGAGAGAACACTACTTTATCCGTTTAAAAATATAAGATTTT
TGAGGAATTCTTTTTTGCAGATTATGATGGTTAATCATGAAATGGTGGTATGAAACTAGA
GTAACTTAATCGGTTGCTTTGAAGATAGCTTTGGACTAAGTTTATCTTTCAATGATCAAG
ACAACATCAGGTGAAAACAAATTAAGACCAAACGGAGCCTTCATATAGATAGGGTAATCA
TCAGGGATGTAAGATCACAGTGATCAGGCACATGCATCTCCAATGCAAGCAACATCACAC
AGGTGGAAGTTGTTGGTAGCTTCTACATTGTGCGTGTGCTGTGTGGATTATCTGGTTGGT
GAATGATGATTGATGAGTACGACGCGAGAGAGATGAATCTCCTGGTTGACACGTTTGCTA
GCAATTCTCCCATGTTTTTGCATTTTGGGCGTTGCAGTGTTGTTATTGTTGTGATGGCGT
CATAAAAGCCTCCTAATTAATCCCATCAGGACATCTTTTCTCATCTACAACTACTAGATG
CATTTCTCAATAATCAGCTCATTCACTAATTCATTTAATAGCATCATTCCGTGAATATTT
TTCTTAAAGGGAGTATGATATTTTGAGTTAAAATAAAGATGACATGACATGACATGACAT
GACATGCATGCCATTAGACCTAGGTGATAAATACTCCACCATCATTCTAATTTCTCTAGA
AAAAAACACAATCCTAATGAACAAGAACAATGATTCAATGGTACAGCTCAATCATGGCAT
TTTCATGCATTGCAGCATTGGTGAGGTGTGAAGGGAGTAGTGGAGGAATTGTAAGGTATG
GATATCACCAGGGGAATCAAGAGGAGCAGTGGGATTATGGAATTGTCATGGAGTGTTTGT
TTTTGAGCTTAATTCATATCTGAATCTAGCTTGGCCAGTAGACCAATTCTGCTCCTTAAC
ACGTTTGACTAAATCATAGGAATGTACAAGGATGATACATTTGTATTAATTATTTGCGGA
TGAGTTAGCATTGCACACGCCTGCAGGGATTTGGTCAAGATGGGGGTCAAAATGCAGGCA
TAAAAGGAGGGTTAGGTTTCCTTTTTTTTTTTTTGGTTTCGTTAGATGCATTGATTCATT
CAAAAACTTCGTTCCATAGGGAAAAGTTCCGATTCTATGCTTAGGCCACCTTTGATACAG
AGGAATTTTAAAGGATCTGAATTCTGAACTAAAGATCAATAAAAATCTTGTAGAATTCAT
GTGTTCTAAGTGTCCCCCTTCTTCTAAAGACCCTTGAGCTTACAATTTTCTGTCATGGCT
GAGATTTTAACCCGAAATCATGTTCTTTTCACCGAAATGAAGTCGAGAATTGGCTTCAAT
GCTAGATCCACTCACCGCCATTTTGTTAATATAAACAAACCAAAAAAATGATAATATTTT
GTGTATGGGCCAGGCCCAACTAAGAAAGAAGCCCAAACAGCATATTCTAACGAGCCCCAA
CATCCGGCCCATTTAACACAAAGATTCAGCGAGAGCGATGGGCCGGCGTTTCCTCTCCTC
GCGTTCCCCCGTCGCCACTCATCCAGTCGTTTTTTATTGTGGCCCCTGAATTTCCGGCGA
ATTACATTTCTCCCTCCGTCACTCACACAGTGGGGTTATATTTTTTAAGCACGGAACCCC
TCCACGTATTTATATTTTCCACTTCAACCGCTTCATCCCCTTCTTCCTCCTCCGGATTCC
>Os05g0439400|OsPUB44	Os05g0439400; upstream from -3000 to -1; size: 3000; feature type:gene; location: Oryza_sativa.IRGSP-1.0.46:5:21522171:21525170:D
TCGCCATGCCGCTGCCGGCGAGAGAGGACACGGTGAGTGCGTCTCGCCTTCGTTGCGCCC
TCGCTTTTAATTTTGTCGCGCCGACCAATCATGCCGGCTTTGCCGGATTCCACATCGTCG
TGAAAGCTTTCGGGAAAAGAAGTGGCCACATTTCCAGCGTTCTTGTGGCTCGCGGCAAAG
CGGGGTGGGGCACAGAGGGGCACCCGGATTATTCCAGGTTCCAGCGGCTGATGTGCACGT
ACGCACGCACGCACGCACGCACGCCGGCTTAATTCCAAGCTTAAAGACGGATCAGAACTG
AAAACTCAGTTCCCAGCTCGAGAAAAAAGTGTGCTTAGCTTTTGCATGCATGCATCTTCA
AGTGGCAAAGTACGTGTTAGGGAGGGTGGAAATTCAGGCTTATGATGTTGTGTTTTCCGT
TTGCAGGTAGCAGTGTTTCTTCCAGTCTCTTGTACTGTGTCCGTGGTTCCATCCCGGTAT
CTCTATGCCTCCCTTTATCCCTTTTCAAAAAGATTTTTTTTCCAAAGTAGATTCTTATCT
TTCATAAAGTTTGACCAACCTTTTCAAGCCTGCTCAAAAGATTTTCAGCCCAAAAATTAT
TGAGATTCTTTAGTGGCATTAGTTGCTCGCCCTAAATCAAGGACAAAATTTGTTAGTTTA
TAAGTTATAACAACTCCATTTAGCAGTAACCTTTCACTTACATTTGGCAGATTTTGCTAG
TTAAACTAATCAAGACAGCCATTTGCTCGCTCACACCGTCAATATAATCGTCACCATAGG
ATAAAAGTTATTCACGATATTTCCCATTTAGCGAAAAAAGGAAGATTCTTTTACTGTTTT
TCCCATTATTTTCATCGACTTCTTTTCAAAATTTAAAATATATTTTGTTCCACAAAAAAA
TAATTTATGTTTTAATTCATATTTGTTGCTTGAAATGGAGTATTTAAATTTGCTGGAGGA
AATGATTGGTATCTAGAAACCAACTGATAAACCATTTTTCAATAAAAAATAAAATATTTT
TACATAAATAAGAAATGTTCTTTTCCATAGAACAACCACATAAAATTCATCCAAAACAAA
CTCGATCTTGGATTGAAAACTAAAACTCAAATGCATTGCCAGTGCACTATTTTATTTTTT
TAGAGAGGAAAAAAGTTTCATTTTACTCCCCAAACTATTTCGCCAAATCACATGACCCTC
TAAACTATTTTTTAACTTATTTTTACACCCATAAACTATGGAAAACAATCCATCTTATCC
TTAATTGTATTTCTATTTTTTGTTTCTTGCTATACAAGTCGTATTTTGCACAAAAAATTT
GGAATGATTGATAAATGCATTATATATAGCTCACCTTTCAACATTTTTAGTAAATTTTTT
ATCTATCTTTGTTGGAAACACCTAAGATTGATTTAAACATCAAGATTTAAAATTTGAAGC
AAATATTATTAAAAAAATCTGAAAATATTTTTATACCTTTGATAATGATTCATCTATCGC
TCTACAAAGTTTTAGATTAAAATATAATTTGTATAAAGAAAATCAAAGAACATAAATTCT
ATGAAGTATTACTAATAGTTTAGGGTGTAAAATGAGCCAATAAATAGTTTAGGGGGTTAA
ATGATCCAATAAAATAGTGCAGAGGAGTACAATGAACTTTCTTTATAAAGTAGTAATTCG
ACACACACAAATAGTACATCACCCTTACATATGCCATAGATGTCCTTTACGTATGCTTGA
AACGATGTTGGAGGTATCAAACACCTTGCGACCGTAGACACACACATGCCCATTTATGGC
ACACTTGTGTATGTATTGCTAAAATTGGTGGATACTAGTGCCAAATATAGGTTTAAATCT
TGATAAGCTACGTGCGCAAATGCACCACTTACCACATGTCAATAATAATAATTATTATTA
GATACTTTGAATTTCATATATTCCATGCCATTTTAAGTATGGAATTGAAAGCATAAACCT
CTCGGATAAGAATCTATCTATATATCTATCTATAAAGATAGCTCTGTAAGACACCCCAAC
ATTTGATCTCGAGACTAAAAATTGCCACATTAATCAAAGAAAAAAAAATAAAGATGGAAA
TTACGAGTTGTATAACAAATTCAAAATGTACTTTTGAAATACACTGTATAATTTACAACT
TTATACATTAAAAGGTAAGAGTAGTTGTATATAAAACCTAATTCTACTTTCAAAATATTA
TATAGAAATTACAAATGTTTACATTAAAAAAGGGTAAGAGTTGTATAAAAATCTAATTGT
ATTTTCAGTACCATAATTTAGAAACAGAAGACAAGATATTTTTTACCTCGATATAAAATT
GTGGGAAAATTCACTGGTTAGAATGGCTAAACTGTAAGATGGAGATTTTTGTTCACGGGT
TATCTGAAAAACACACAAACAAATTGTGCTCAAGTCTGCAAATGTTTCTTCTGCTCCAAA
TAATTTCAAGTTCCTACTCAATTATTTGATCCTGACGGGACCTTACTTTTTGGACACTTG
ATTTTATTTCAACTGAACATAATTTTTACACCAGTAGCTCTTATATTCTGTACAAACACA
TCCTACCACAATTTTGGACACTTTGATTTAATTTCAACTGAACATGATTTTTACACCAAA
GCATACAAATTTAATTCCATGGCAGGAGCAAAGTTTGGTATAGAACCAAACGAGCCGGTA
CTGTTCCTGATGAAAATTTTGACTGCACGCACGTTGGAAGAAGATGGCAAGGAGCATGGG
GCCCACGCGGCCACGCAGAAAAATCTGGATTATATTGGCATCTTTTCTCTCGTCTCGTCC
CCATCCATTCCATCCTCCCCTCGCTTGTTTGTTCCCATGGCAGTGGGGCCCACCCACCCC
CATCGTTGTCCAAAGAAAACGTCAACACCACCATCCCCACCCACTTGACTTTGACCGTTG
ACTCGCTGACATCACATCCACCATTCTTAAGGCCCCCACTCCCACTTCGCCCCCAGCCCA
>Os08g0434300|MDH	Os08g0434300; upstream from -3000 to -1; size: 3000; feature type:gene; location: Oryza_sativa.IRGSP-1.0.46:8:21056009:21059008:R
TTAACAGTTTGAAAAACATGCGCGCGGAAAACGAGGGAGAGAGGATAGAAAAAGGGGTAT
CCGAACACAGCCTAAAATAGGAATAGCTAGGATCAATAATGAGTTAGGGCCACATCTCCT
AATAGTACCAATCTTATGAGCCAACAACTCAAGGCTTGTTTTTTTTTCAAAAATTTGATT
GAGAAAATAGAGGAATAAAAAAATATGTTATTATGATAGGAATTTAAGTGTGAAATAGAG
AATTATAGAACACGGAAATGATAGTTTAGTAGAAATTGAATAAAAGAGATATACTTATAT
GAAATCTTCTATAAGGTTGATCCTCATGTTAAAAATCCTCCAAAACTTTATATGGATCAA
GAAATTTGAATTTCACATGATCCCATAGTTTTATATCATTTGTTATAAAGGGTTGTATAG
CATAAAATCCTATAGGATTAAAATCTAAAAAAAAAAATCCTATCTTATTTTCAAATCAAA
GCAACCTGTAAGCACTTTACCCCATTTTTTAGAGAGAATCTATTCTATACCACTGAGTTT
ATTCGAGTTCAACGATTTGCCATCGACATTGTCTCCTTCTATAATATACCGACGACTTTA
TCAATTGTTCTACAATACACCATTGGGATGGACATTATTTTCAAAAATGCCTAAAATACC
CTTATGAACATACAAGGTTAACAATTGATTTATCCTATTAGAAGTTTCAAAAAAAATATG
AAAATTTTTATATGGCCTCCTTACACAACATGAAAGTTTGTATAGAAGTTTTAAGTTTTA
CAATTATATATTTTTTTAAAAAATATATAACTTATTTGTTATATGCTATATAAAACTCTT
TTATTGATGTTTTTAATATAAATCATCTTTCATACACTACATAAGATATTTTTTATTATC
TCTCGTATAAACAAATTTTATCTCATATACCACATAAAAATATTTTTTTCTAAAAACTAA
ATATACCAGAAAAAACTTGAAACATGCATACAAACTTCCATGTTGTGTAATGAGGCCGCA
TAAAAATGTTCATATTGTTTTGAAACTTCTAATGAAATAAATCAATAATCTTGTATGTCC
CTAAAGGTATTTTGGGTATTTTTGAAAAGAAGGCCTAGCCCAATGACGTATTGTAGAATA
ATTGATAAAGTCGTTGGTATATTATAGAAAAAGACAATGTCAATGACAAATTGTTGAGCT
CGACAAACTCAGTAGTATAGAATATATTCTTTCTTTTTTTATATAATTACATAGAAGATG
CAGATAATCAATTTTTAACATGGGCAATTCAGGTTAGACTTGCACATTATTCAACCCTAC
TACATGTTTGGTCATGGTTGAACAATCACTAAACCACAGAATTGTATTTTTCCATGTGAA
AAAAAAGGACACCAAACCACAGAATGGTGAGGCAGTCCATACACCGGATCCACGCAGTGC
ACGGACGGCGGAGGCAAAAGCCCGTTGTTTCCGAGGCCCTCACGCCGCCGCCGCCGCCGC
CGCCATCGCCGTCTCCAGCGACCACCACCATAAAAAGCGAGCCACCCACGCCGCTGCCCG
CTGCCCTTTTCACGACCCAAAAAAAAAAGAGGCCAACGCCAACCCACGCATCCCCTCCCC
TCCCCTTCCTCCGCCCACGAGTCCACGACCAATCCGGCAATCGAGGTACCCGTCCGTCGA
TCTCTCCTCCTACCTCTTCTTCTTCTTCCCCTCCAAGATTGGATCGAGATTGGCTCCGAT
TCGTGCTGTCTAACCGTGTTCGCGCGTGGTTCTTGGCTGGCTGCGTGCTTTGGTCTGGGA
CAGTGGGATTCCGTGGTTGGTTGGTTTGTTGCTTGCTTGCTCTGGCCCCGATCTGTTCGC
GGTCGCACGGCGGAGTTCCCGAGGGTTTCTTGAGAAGCTTCATGGATTGCTGGTAGGATA
TATGCAATGGTACTAGATGGTAATCGTTGGGTTCGATGGGTTCTGTATTTAGGGGGGAGT
TCACCATGGTTTGGGATTAGGTTGCTGGGTTATCGCTGAAACAATATGTTTTCTAGTAGT
TCAGTGAGTCGTCAGGCTGATTGACTGGTGTTACATTTCTTGGAAACCATTTTGTAAGAA
AGCTTGAGATTGATCTTGGTTGCTTGGATGTTTTCAAATTGTGTGCTGTTAAATCCAGCA
ACAACTTCAAGTTGTTCTTTGTTTGCTTCGTGCTATCGAACAAGTTCAAGAATTGCAGCA
GTCGGCTGCTTTGCGTTGCTTTCGTATTGAGTTAACAATCAACACCTGGTTTCAAAAAGA
AAAAAAAAATACAATCGATATCATGTGCAGTAGTCTGAAAGAACAAACTACGCAGTTAGG
AACTTAGGATTTGGTGTGGAAGAGCCTTTTTTTATTTGGGTTACATTTTTTGTAGTGAAA
AAGGAGGAGGTGGTTTTACTCTGTCTAAGTCAGGTGTATACTAGTATTGATTAGCTGGAG
CGTTTTATTTAGATATCCAATATTAACATTACTTCCCTTGCATGTCCATGTATCCATTAT
CCCTGATCCTTTGTTTGCTATGATTATTTCTGTTGAGTGATCCCTGTTGTGTGCGATAAG
CCCAATTATCTTTTAAGTGACTCTCATGTGCTGATGTACTATTATTCAAGATCTGAAGGA
TTTGGTGCTCTGATGCCCGTAGGTGTTGTCTGTTCCATTGCATTTGCCTGGAAATACTGT
AGAATCTTGTAGATAAATGATCCCTTTTGTCGGGGAAGATAAGGGATCATTTTAATCTGT
CAGTATCACTTTTCAGGGTTTTTGGATGAATTAGTGTACTGATTTATAAAAGTTTCTTCA
TGTTGCCAATCTGTATATTATATCTCACCAATATAAATCTATATTCCTGCAGTTAAAAAT
GGCATCAGCTGTTACCATCAGTTCGGTTGGCGCTCAGGCTGGCATGATCTCAAAGCCAAG
GAATCATGGCTTCACAAGCTACAGTGGCCTGAAGGCAGCATCATCCGTTAGCTTTGAATC
>Os09g0426800|WSL2	Os09g0426800; upstream from -3000 to -1; size: 3000; feature type:gene; location: Oryza_sativa.IRGSP-1.0.46:9:15490031:15493030:D
TGCCTGCTGGCGATGAGTGCTGCTGACTGCTTGCTCCATGCTGGATGCCGCTGGTCTGCT
GCGGCGCTGCGCGCTTCCTGCCTGCCCGCGGCTGCCGCCGTCACACGTTCGTGCCTCACT
GCCTTAGTTGTCGTCGCTGACTCATTCACTCGCGCGATCGAAAATTGGGAATGACAATTG
CGATGGAAACGAAAGGACGCGGTGCTTGTTGCAGCGAAAAAACGAAGCAAAACAGTTGCC
AACTTGCCATTGATATTTTTCTAGAAGTAACGCATAGGGGTGATGGGCCTTGGGCTAGAT
TTCTATGGTGGTCCATGGACCACAGTGTAACTCCGCTCCTGTGCTTAACTCTTATTCTTA
TTTTTAAAGAAAATCCGCTTTACAACTTTAATTTAGATGGATGAACGAGAACGGATAATG
CGCCCGATAAATTAGGGATATCTTCTTTTGTGGTTTTCTTTTTTTTTTGCCGGTTCGGCG
GAAGAAACACCGACCAAATTTTATTAAGATTGAAAGAAGTTACATGCATCCGACATTAGA
CCGTCGAGTTAAGGCGAGAAGACCTAAGAAGCAAAACAAAAGAAAAACTGAGAGAAGAAT
GTAAAGGGCAAGTGCACTTAGGGCTACTCCTCACTAAACCTTCTTTTGTGGATTGATGCA
TCAAAAAACTATATGTACTAGGTTACATCGTGTTTTTTTTTTCGTTTTCGTCTCATTCTC
TGCTTCGGCCTGCCGTCTGCTTATACCGTTAATTCGATGATGACTCCAGACTTCATTCAT
GAATATATTTCTACTATAGATATACAACCCTCGCTCCTCTATGTTTATCTTCATCTTCAT
CTTCAGGAGATTCAAACACCACCTCTTAAAGATGAAGATGAAGATGAAGATAAAAATTAA
GTGTTTCACGTAAAACGATGTATTAATAACATGTGATTAATAGAGTTTTAATTGTTATAA
ACTTGAAAAATGAATTAGTATGATATTTTAGAGCAACTTTCATATATAAAGTTTTCGCAC
GAGACGTACCGTTTAGCAGTTTGAAAAGCATGTCACGAGTATCCAAAATTTAATCTTGTG
CTTGCAGAAGAAACGAAGAGGGCCTAACCCATATAACCTGCGTCATTAATCTATAGCTTA
GCAAAGTTTACTTTTTTGCCTGCCTCCTGGCACAGGAACGCCGACGAAGAAAAACCTACA
GGCTTTCTCAACTATGATTCCTTCCTCAACCTGTGAACTCTGGCGACAGGAGGACGACAG
GGGTGTATGTGGAGCAGATAATGCACAGTAATAATCCAATCCTTAGGACTTACAAACTGC
TGGAATGAACTGACCAAGTACGTTTAGAACGTAGGAATTTTGACTTATACATGCATAGTG
TGATTTGTACGTGAAATACATTAATTAATTTTCTGAATTTGTTTCCAATTTCTCGTCGTC
AGGCAATGCCGCAATGCCTTGTCTTAAAGATTGCAAATTGAATGCGCCATCTCCATCGAT
CTCTCTATCTCCATTGATGGCTGCCCAAAAAATAAAAAATAAAAAGAGCCGACAATGTTT
AAGGAGAGAAGCATACGCGCACGTTTCGTGATGAAACATACATGCAAGACTAATTTCGAA
TTATATATCACATATTCGCTCTCTGAATGAGCGTATCGGGTATTTGGAATTTCGTTTGAT
ATGTAAAAGTTGAATTTTAGGTTACTTTTTTGTGGAATAATATATCATAAATTAATATTT
TTTATAACTATTTATGTGACATGTAAATGACGAGCTGATATCAGTTTAGGATAATTTCCT
CGCTAGGTGATTGAACGAACCCTGCACGCGGCAGACGTCGTGGCTACTACTATCTAGCTA
GCTAGCGTTGGTTACGCGTGGCTACTATCCAGCCAGAATTGGTTACGCCGTCGCCCATCG
ATCCGCCACACCACGCCAAACGCGAACTTAATTGCTACTATCCGATAGTATGTACGCGTA
CTACACAAAAGTGGGGAAAAGAAGGTTGTCCTGACTCCATGAGAAGACGATCCAAAACAC
GGGGCCGGACAACCAAACAAGCTAGCTAGCGGCCGGCGGCGAGCCACCGTCGTCGTTGCT
GAAGACGTCGACTAATTTGGCCTCCCGGCCGGCGCCATCGATCATCTCAAAATTAATACT
CCCTCTGTATAAGGGATTTTGAGTTTTTGTTTGCACTGTTTGATCACTCGTTTTATTAAA
AAAATTTGTGACAATATAAAAAACGAGAAGTTGTGCTTAAAATACTTCGGATAATAAAGT
AAGTAAAAAATAAATAATAATTCTAAAAAAAATTTAATAAAATAAGTGTGCAAACAATAC
AAGCAAAAACTCAAAATCACTTATAATCATGGGACGGAGGGAGTATATAGTATCCAAAAA
TCATCTCAAAATTAAAACCGAATCGAAACTCGCCGGGCCGCGGCCCGCCCGGCCGTCCTG
GCCCAATTAATTCCGGCGACCGCTGCATGCAACGCTCCGTACGTGATCGCCCAGCGGCTC
GCGCGCGCACCACGCGTCCACGCGTCTCTCTCCTTTATACATGGACAATGGATTAATTTA
CTTGTAGAAAAAAAAACACGAGGCTAGCTTAGCTTGTGCCCGGCCCAGCCGCGTGCGTGA
TTTCCCCAAGTTCACAACCTGTACGTGTGTGTGGTACGTAGCGGTCGCAATCCCGTTTCA
AATCTCGATCGTGTGTGGTGCCATTAACTCCGTCTGGTTGGGGAAGCCGGTGGCGGATAG
CCCGACTGACAGGTGCTGTGGCCTGGCGGCCGGCCGGCCAATCGATGGATGGACGGATGG
ATCCCATCGATGATCCTTCGTTGATTCGCGTCAACCTCTCGCTGCCCGAATCGGACTCTC
ACCTTCCCCGCCCTCCACCGCTGTGACCGCGCGCTGTCTGTCCCTTGGCTAATACCAGTC
GCAGTGCAACTGTGCAAGTGTTTCACGTATATAAAAGCATCCCGAGACGCAGCGCGCATG
>Os03g0336000|Os03g0336000	Os03g0336000; upstream from -3000 to -1; size: 3000; feature type:gene; location: Oryza_sativa.IRGSP-1.0.46:3:12441923:12444922:D
TGGAGTGAAGGAAATACACGAAGCAGGAATCATACATAGGGACTTGAAGCCTCTCAATAT
TCTCATAGACAGTGATGATCACATTTATATCACTGACTTTGGCATCTGTAAGTTTCTGTT
TGTAGCATGTAAACTATGATATTGTAAATTCAGTATAGCTAACATTTCAGTTTTCAGCAA
AGATAAAGCCATATCCAAGTGCAAATGTGAGGTATCCAGGTGGCCCTCAGTATGGAACCC
AATTTTATTGCGACCCTATCTTAAATTCCACCCATCTGCAACATGATGAGAAGGTTAGCC
TATATTGTTGTTGGTACCTTTATCTAAAAAAAAATAGTGTTGTTGGTACTAGAAACAGTA
ATATCATTGATTTATTAACGTTGTTTGTCTTACATAGGTGGACTTTTACAGCTGTGGTAT
AATTTACTTTGAGATGCATCTGTTAGGGATCACAAAAAGAAGAGCTTATGTAAGAAAGTT
CTGCGACAAATACTCATACAGTAAAAGAGGTAATTGGGATATTTGGACTAGTTCCTTGTG
GAGTAACTGGGGAGGAGATCTGAAGATTATGAAAGACTTGATCGTGAAGCGTACTGCCTC
TTCAATCTTATTGGTAATGGCCTTAATAGAATACACTATCTATAAAAGCAGGGATCTCCA
TTTTCTTAGAAAAAAAGGATTGATAAAAAAACAAAAGTTTGTGCCACTATAATTTACAAG
AAAAAACATTTCTTTTACAGGAGAAGCCACAAGTCGCTGATTCAGAAGATAGGGAAGCAC
TTGAATGAACAGTCTACTCAAGAGGTCCATCTCTCCCCTCTATGATTTCCCAGGAACTAT
TGTGTTTATTTAATCAATTCGTTTGAGTTAGAATTCATCAATAGTTGATTTAGGGGGTAA
GCTGTTGGAACTTGGAAGTACCAATGGGAAGTCTAATCACGAGGTGTGCTCTTTGTAGTG
AAAATTGTGATTTGCATGCTTTCCCATGTTAGATAATCCTCCTAAGTGTCTGGTTTATCG
TTTTAGGCTTGTTTACATGGTTCCATGTTTGTCATGTCAGATATGTCCTAGTAGTGCTTA
GTTTGCACTTTGCAGCATTTGTTGCTCGCACTCACTTTCTTGGTTAGTTTAGCTTACTAA
GGCTCAGTATCATTCATAAAGCATGAATTTCATTCATCTAATTGTTATTTGTGCTTACAA
CTTCCTCTATCTTTATGCAGGAAAAAACGAATTTACCGATATGGATTCCCATGTAAATAA
CTGAAGATTAGCAATGTGTCTGCTTGTTTTGCCACAATCCTCATGTGGACAAGTAACTGA
AGATTAGCAACGAGATGTGCATAGAGGTTATCTTGTTTGATGGCTCTAAGGCTGTAAATA
TACTGTCTTAGCTTTCCATAAACTTTCTGTAGATATTTCAGCACGTACAGAAGATTGGCA
ACGAGATGTATAGATAGAATAGATCTACAGAAACATTGAGATATATAGCGGTATGTTTGG
TACATATGATGAGATCATGAGATATACTGGAACACTGCACAGAATGGTATCAGAGGATTT
TTTTTAATGGATAAATCAGTGTTTGGTTGGAGGAATAGGGTGGTCCATTATCTTCACACT
CACCTTTTTGTTTGGTTTGTGTAATGGAATGGGTTAGATCCACCACCACCTCATCCCTAG
AAGTAATTAGTGCCACCTCTATCCCGTAATGGAAGGGATTTTGCCTACATTCATCCCTTA
TATTCTTAATCCCCATAATGGAAGGACTTCATCCCTCATCATGGGTTTTTTGGTCTCTTT
TAGTTAATGGGATTAGTACAGGGTTCACTGATTCGTTTCTTTGCAGAAAATACGTTATAC
TATTCTGAGAAGCACATTGTTTGTGGGGAATATATTTAGGGTTGGGATCTAAAAAACATG
TTTTGAGCTTCTTCCATCCAGACAACATGAGAGTTGATGTACTTAGTAAATCATTTTATA
AAACAGTCCCAAGGTAATCGGGCATTCACTACTTTTCCGTTGTGTGTTTCTTTCGTTGAT
GAATAGTGTTGTCAGAGGGTTAACTCCGCTAGCGAGGGACAACGCGGTCCCCCTTTGTGA
GTTCGGCCGGAGGCAGCGAGTGAGCGCAGAGGGAATGGAGAAAAGTAAACGGAGGAAACC
CTCGAGGGGGTCAGATACTCGAGGTGGAGGAGACACAAGAGATTTAGACAGGTTCGGGCC
GTTGTGGAGCGTAAGTGCGTGACACCCTACTCATGTGTATGATGATTTTTCTGAACTTAC
AAAGTCTTTGAATCTCTGGTGAGGAAGCTAACGCACGGTCTCTCAGGAGTTGTGGGATCC
AACCCCCTCCTCCGTAGGCCTGGACCTCCTTTTATATCTCAAAGGGTTACCACATGTGCC
GCAAGAGCTATCACTAGAGGAGGGAAAACATTCTCTATATTAAATACACGTTCCGTGCCT
TAGCTCAGAAGTCATCCCTGCATCGGCTGCTGTGCGGGGCCCGTCAAATCATGCCGGCTG
ACACGGGGACGCCCCTCGTCACTCATCATTTAATGAACAAGGACTTGGGGGAGTAACCAC
CGTGCTAGAGACACAATCTTGGGTGTGTCCAGTGAGCGGTGAGTGGCTCGAGGTCCCTTA
TCATCACGATGGGACGCGACATACCTGCCGGCTTATACTAGTACTAACTAGCTTTTCCGG
ACATTATAACCGGATTTACGGTTGAGGGAGGCGATTCAACTAGCAGCAAGAGATGAGGGG
GAAAAAAAGACTTATTCCCAACTCAGATTGACTCAGCCCATCTCCTACGGCCTAGGTCAC
TCGGCCCATCTCTCCTCACGTGTACACTAACCCACGAGAGGCCTAGGTCACCTCCTGCTG
CCTCGGCCTATCTTCCCTAGCTGCTCGAGTGGTGGCAGCCCATATATGACTTGGCCACTT
GTCCCGTTGGGCCCTCACCGAGTGGGGAACATTAGGGGTGCTACGCTTCGTGTGCTTGGC
>Os04g0390100|Os04g0390100	Os04g0390100; upstream from -3000 to -1; size: 3000; feature type:gene; location: Oryza_sativa.IRGSP-1.0.46:4:19186127:19189126:D
TTTCTGAAGAAAAAATTGGGCTGTTTCAGTTTTTTTCTTTACTTATTTTTTTACATGTTC
CAAATTCATATCTGCGAGAATATTCTAGCAACCCAAATTATTTGTGTTGAGTATCGTCTT
AAACCATGTTAAAAGCGAGGGAAGATGTAAACTATTTGACAATACGTAACAAAATTTCCA
TATTCCAAACAAGGCCTCGTGCCTGTAAAATACAATAACTTGTTGATAATTGAAAAGAAG
AAGAAATTACTCCATGTGTTCCGTTTAATTCACATTAAGCCTCGTTCATGTCATGATAAG
TTGTTAAAGACATATGTGAAGCTCTCAGGATTCAGTGACGGATGCATAACTAGAATTATC
AGGTGCCCAATATATATCTTACTAACATATAGGCCGGACAGACAGATCAACTAAATACTT
TAATTATATATCAAGGTAATAGTTATAGAGATTGTAAATTGTACCGGATGTCCCTTTCAC
CATGTAGGCTCAACGTGGATCCACTCTGCTTGCTTGGATCAGTACAAGATTTGTAAGAAA
GATATATTCCACGGTTATCTTATTCATTTCCCCTTCCAATCTGCAACGGTACACTGCAAT
ACAGGCACCAGACATGTACGAAACAATCCTTAACTCTTTATTAATTAGCTGTAGAATTGA
ATTGCTGTGATCCAAAACCCAGAATATACCACAGATCAGGCACTGTGCATATTATGAACT
TCAGAGTAATTTGCAGAATGCCTAGCTAATTACCAACTAATTTGCATCTGAGCTTATGTC
CATGAGTTTAATTATTAGTCATACCAAAATGACATGAAACCCACTCAGAAGCAGATAACC
TGGTGCTTTTTTTTTATTTTATGTTAGATCTATTGAAGTGTTAGATTCAATGGCTATAGG
TGTTCCTTGCAACTTGCAAGGAAGGACCATCTACAAAACCATGGATTTTGTGGAAGTATA
TGACAAACTAAATCAACATCATCAAGCAACCTGCAGGTTTTTCTTTTCTTCTGTGTTTAT
CTGTTTGGTGACATCCTTTTTAGTTTCTTGACAACGAAAGAAATCCTTCTACTACACTCT
TTAATTTGCCTCCTTGTTTTCCCAGGTACTATCATCTTGTTGCAATGCAATGCTAATACA
CCACAAAACAAAAGGAGAGGAGAAAAAAAAAGAAAGGGAAAAAGCTAAACATCTACACTT
CTATTAAGCTGACAAGTGTTTGTGGCTTTGTGCATGAATGCAAAGGCTGTGCACTGCATC
TTGCAGCATCACAATTCACGCATGTACTACCTAACGTGCTATTCTTTTTTTTTTCTATTA
CACGAAATACACATAGCCACGAACTACTATACATGTGTGTAAGTCTATAAGAGCACACCC
TCTTAAAAACAAATACCGAATAGTTGAGACCAACGATAAATACCTGATCACACTAAACAT
ATCTACCTACCGTGGTACTCTTTTTAACTTCCTTAGCGGTAGGCAGTAGCATGACGTATT
GTACATTCATGGAAGAGAAGAGAACACTAACTCAATCAAGGGGGTGTTTAGATCCAGGCG
TGTAAAATTCTGGCGTGTCACATCGGGTATTATATAGATGTTGCATGGGGTATTCGGGCA
CTAATAAAAAAACTAATTATATAATCCATCGCTAAACCGCGAGACAAATTTATTAAGCCT
ATATAATCCGTCATTAGCAAATGTTTACTGTAGCACCACATTGTCAAATCATGGAGCAAT
TAGGCTTAAAAGATTTGTCTCGTAAATAGTCTCAATCTATGCAATTAGTTATTTTTTAAG
CATATATTTAATACTTAATGCAGGTGTTTAAATATTCGATGTGATAGGGGGTAAAATTTT
TGTGTGGGAACTACGTGGGTCCAAACAAGCACAACCAACAGTCTCCTGGGTTACATATGT
ACAAGCCTATAACTACAACTACAACAAGGCTGTATGCAATTGCATGGATTTGCTAGCTGT
TTTGAATGGTGGTTAAACTGGCCTATTTTGCCAGGTGTAACTGCATTTAGAGGTGATTTA
ATTTAATTTGCTCGCTGTTTGAATGTTGGCTTAAATTGGCCTTTTGTTTTGCCAGGTGTC
ACTGTATTTAGAGGCTCTAATGAGTCATGATTGTCAGATACATAGGATTTGTTTCTACTT
AGCTGTGTGTGATGATGCATGCATGCCTATCTTGATTGGAAAACGCACAACCGGGTTGGA
TGCACGTACCCATCTTTCTATCTACTAGCTGTTGTGCAGGCTGGAGTGATAACTGAAAAC
TTTGAAACTTTTGTGAATTGCTTTGAGGAAGAAAAAAAAAGAAGAAAAAAAAAAGTCACT
TTGAGGAAGCCACACGAGCACGGCAACAAGCTCTTTGAAACCATGGAAGCTAGCCTTTGT
TTGCAGTTTTGTGCAACCCGATGGATGGATGCACTCACCTTCATGCAGATTGGAAAAAGA
ATTCATCTTTGGTACAATGTACTAGTCCTACCACTCCTACTTAACTAGAAATAAATAAAA
GATGATGAGAATTGCCTATAGAAGAAAAAGAAAAGTAAAACCAAAAACCGTGCCATCTCC
ACAATAAAACTTAAAGCTTAATACATAATTGTACCTAAACGCAAAATAGACCTATTTGAA
CCGCCCGCCGCCGAATCATCCGACTACCGTAGACGCTACGCATATATTGTTTCTCGAACA
CTCCAGACGCGCCCCCGTCCAAACTACAACACATTTTCCATCACTAAATACCTCATCCCC
CCTCCTAATCTTTTTTCCCTTTAGGTACACCAAAAGAAAAAAGAATATTGAAAACTCCAA
AAACATAAAGGAAATAAAAAGGAAAATAAATCCTAGGGGCATAGATAGAGAGAGAAAAAA
AAGGAGAGAGAAAGTGAGTGAGTGAGAGAGAGAGATTGAGATGCCAAATCATTTCCATGC
GGATCTTGGAGGCGCCCACCCCGGCTACATAAGGTGCCGAGGCAGTGACACCACCACCCC
>Os05g0468900|Os05g0468900	Os05g0468900; upstream from -3000 to -1; size: 3000; feature type:gene; location: Oryza_sativa.IRGSP-1.0.46:5:23017500:23020499:D
AAAGCAAGCTAGATAGGAGTAGCAATTATATGATCCATCGTCCATCCAATCGCATGACAG
CGTACTCCGTTTTCTAACTTGCACTGCGTGAAAAAAGTTGTCACTTCACTGATATGATCA
TGCTTTGGCTAAGTAGCCAACAACTACTGGCAAGTACGAGAACAGCGAGTAGAATGTAGC
CATGACGGAAACCGTACGATGGGGATGAGTGGGATCAGGGGACTCATAGTGCGATGCTGG
TGAAGAAGATATGGCGCTTTTGCAGTTTTTGTCCGGTTGGATCGCCTACTTTTTCCGCCC
ACAGCTTAGCTAGTTCGCACTTTGCCATATGCAACCTGGGCAGGGCAACGCCATATGCGC
CTTTTACCCGAGCACCGTGCCTAATCTAAGCTTAAGCTCAGCCCAATCGTAATGTGCACT
AGGTGCAACAAGGCAACAACAACTGCACTGCACTAGACGTAAGCCCAAGAAAGGAAGAAA
GCTAGGAATTGGTGATAGAACGCACGGAAAGTAGCCTGGACAGCCTTCGTCTCCTTCCTC
CAGGATATTTTTCAGAAATGATGATAGATAATGGAAGTGATCAGACACATGGCTTTCTGG
CTTTAATTCAGTCATTGCCCCTTTTTTGGAGCTGCTAGCTAAGCTAGCTAGCTATCTGTT
TCTCTGCTTTAATTTGTGTGTAGCGGTCATTGTTAGGCATGCAATAATCTATTAGCAAAA
GGAGCATGATAGTAGATTAGATTGGGAATTAAAGGGTGGTGTGTGTGATATATATGTATG
CAGCTAGTGATATGTGTGATCGACCACTCAAAGCCCGGCCGGGGTCCATGGTGTGCAGCG
AGCTTTTCGATCGGGCCACAGCCTTATCTCGATCAATCGAGCTCAAAGCGATCTGTGATT
TGTGACCGCTACCGTTGCTGCCTTTGATCTCGCGCGCCGCGCGCGCGCGGTCGAGCCGAG
AGATCAGGGTGGATTTCACGTAACGTCGCACGCCATGTGTCTTGTTGGCTTCCTGTCTCG
GTGGCTAGAGGCGTAGTGCACATCAGAACAGAGGCGCCAAACTGAACAGTTACTACTATT
GGTATTTTCTCCTTTTCTTTATCTTTCGAGATAGAGAAAAAAACAAGTGCTGGTATTCTT
TTTAGCGGTCTAGATATTTTGTTTTCATGTTTTCTGTTTGATTTACATTATTCAGTTTAC
TATCGTAGATTTTCTACTTGAATATAGGAACAATTCAATTAGGTATTTTTAAAAAAAAAA
TAAAAACAAGTGGTCTGAACAAACAAAAGAAGAAAGTTTTTTTTTGAGAAAACATATTTT
TTTTGAAGAGCAGAATAAATAATCCATTTTAATGATTCGGTAAATAATATGAAAAGATTA
CTTAGGTTATTGCTGCATGAGCATTGCTTCAAGTTATTTCAAGTGTTAACTACTGAAAAT
TGCTTGAAACAAGACGGTATGAAGGCGAAAAAGGCCGCACTACTTTTGTCTTGCTCGATT
TTATTATCATCCGGTTCAACTTCCGGTTGTAAATAAAATGGTCATGTTAACTCATGTGTC
TACTTGTACCAGCAGCTGTTAGGCGCATAGCATGAAGACATGTACACTCCAATCATACAA
ACCTGCGTGGAAAGTCGTCTACCGGATGCAATAATATATGGAGCAGTACACACCAACTTA
TGTACACAAACAATTTGAATATTTACATGACTTTTGTGGCTCAAAACCAACGCCCTCCAT
TGCGACTTGCGAGTCAATAATATTCCCACAAGCCAGCAAACGTGCCAGCGACATCGCTCG
GTCAACAGCTAGCGACCAAATCTTTCCAAGTCGACGCGAAAACGAGCGCGCGGAGCCAGT
CGGCCGAGCCCGAAAACGACCGGATCGCTCCGAAGCTTAGCCAGCCGGCCGAGCCGGATG
CATCCGTTCGAGCGGCTGTCTTCGTTGCTGCCCCTTTCCCGGAAAACGGAGCGGTTCACT
AGTACTTAAAAAAAACATATCGTTTACTCCCTCTGGGTTGATAATACTTATCGTTTTGGA
TAAGGGCACGGTCTCTAAAAAATAATTTTGACCATTATTTTTTATTATAACATGTATAAA
AGTGTTAACAAATATATGATTTTATTAAAGTACTTTTTAAGACTAATCTATACATGTTAT
TATCATGTTTGAAAGATAAATATTTTAAAAATAATTCATAATCAAAGATTCTAAAATTTG
ACTTCACTCTTGTCTAAAACGACAAGTATTATTAGCCCGGAGAAAATAGTAGTTTGAAAA
GCGTGAGCGCGAAAAACGAGAGCGGGGAGTTGGTAACCAGGGGAAATGAACTAGGATGGA
CTCCTCCGTTTTCATATTGTAGGTCTTTTTAACTTGTTTTTTTAAACATTTTTAGTTCGA
GTAAGATTATGAAAAAAATTAGTAACATCAGTTTTATTAAAAATATATTTTCATAATATG
TCTATTTATACTAGAAATATTGATATATTTTTCCATAATTTTAGAAAAAAAATTAAAAAT
GTTTAACTAGGAAAAAAATGACTTATAATACAAAACAGAGGGGTATTTGAGAAGACGGGG
AAATGAGAAAATTTAAAAGATGTGAGAAATGAGGTGTGCCATTGGTGTATGATTAATTAA
ATATTAACTATTTTAAATTTAAAACAAAAATTAATATAATTTTAAAAACAACTTTTCTGT
ATGTTTCTTTTTCTTTTCTTTTTTTTTTGAAAAAACGAACCTTTTAGCGTTTAGGTGTTC
GACTGCGCGCGCGGCAGCCACGCCTTTACCAACCTTAAAAGGGACGGCCCTGCCGCCTTG
AATTTGTTAAAACCCACACGACACCCATCGCGTTTCGCACTCCGGTACACCACGGTGCTC
GCGCTCGCGTCGCTCGCCACACCACACGCCACCACCGCGCGGGCACGCGCGCCACTTGCG
CGCAGACGCGCCGAAGCTTCTTCGTCTCGATCGCGCCGCGCGCGATCGAGCGCGACGTAC
>Os06g0486800|OsFDH	Os06g0486800; upstream from -3000 to -1; size: 3000; feature type:gene; location: Oryza_sativa.IRGSP-1.0.46:6:16646553:16649552:D
GTACTACAGAGCACCCCATAGGTGCTGGTTGGGAACCCCTTATAGGTGTGGGTTTCCCAA
CTGTTACCAATTTGGAGGCACCTTTACCTATATGTATAGGTGCTAGTTCCAGAACCGGTA
CCTATAGAGATTATAGCTGCCAGTTCTCGAGACAGAACCGACACCTAGCCCCATCTGCAA
TCCCCCCCATCCACATTGCAAATCAACAAGAACACAAGAGCATATGCATACATCAAAAAA
CAAAGAAGCACATCACAAACCAAAAGGACAAGAACAAGCTAATCACAGATTAGATCAAAA
CAATTCACAGTTACATGTTTCGCCATGGCTGACCATTACATGTTCAACATATCAGGCTCA
CTGTCCCATTGGATCTGTCGCCTTCGTTCCCTTGCTACTCTCCTTCGACTGACCGCCACC
GTCGCCATTATCTCCTTCTAGCCAGACCGCACCAGCCCCAAGCACATGCAAGGTGATCCA
CGTTAGTGATCCAGTGAGCCCCAACCTCAAGGAGGCCGGATCCGGTGAGCCCTGACCTCA
AGGAGGACGGATCCGGTGAGCCCTGACCTCAAGGAGGCCGGATCCGGTGGCCTCAGACCT
TTAGGTGACCAGATCCGACGTGGTTGGGGAGACATAGCTCGAAGGCGGCGAGGAAGTGGT
GAGGGGCGCTGCAAGGGAAAGGAGGAGGAGGAGGGTTGGCGGATGGAGAGGAAGGAGGAG
GAGGATGGGCGGCAGACGGAGAGGAGGAGGAGCGACAGACAATGAGGAGGAGGCCAAGCG
CAAGTGAGGCTGGAGCGGTGGCGGGGTTGTGTGAGTGGGATGGGGATCGAACGATGTGCG
AAAGAGACAGCCGGGTGGGAAGAGGATAAAATGCAAGTGGTGTGGTGTATATGGACGGCT
TGGCTCAATCTATTTTATGGGTACCCTTCTTTTTTTATAAAAAAACCGGTATCTATAGTA
TTGATGTCGGGTTTTCCTCTAGAACCGATACCTACAATGGTCAAATTTGTCGATACTATA
TTTTTTCATCACGTAGAGGTGGAAAAAAAAATCCATAGATGCTAGTTTCATTTAGGGTTT
TGTAGCAGTGGTCTTTACTTTGAAACAAGAGGGAGAATGCCACCTTGTTAAATGGACCTC
AAAATTCGCCTATTTATGATCAACAAAATGGTGTTTTTTTATTTCAATAATACTACTTAA
AAAATAGAAAAAAAAAGATGAAGGAGAACTGTTTTGGCTATGAAACAAAAGGGACCATAT
TGGAACAATCACTATAGATGCATATGGAACAATAATTAGAGGCGGCTAGAGAGACTCATG
GCTTTAGACTAAGAGTTGGTGAGGCTTGTGCAGGTTCTGTGGAGGCGCCTACAAACCGGG
CGCCCAATTTTTTCTGTATAAATCGGGCGCTGTTTCACCAAGTAGATCGAAAATATTTCA
ATCTTGTAAAAAGCTGAAACACAACCAAATCACCTCATGAAATATTTTGCTACAATATAT
AAAACAACGGTTTCCAAAAAAATCGAGCGTTGTTTCACCCTATATAAAAACAATGTTTCA
GCAAATAGCGAAAGAATGTTTCAATTGTTAAAAAAAGTGAAACACAGTAAGATCACTTGA
TGAAATAATTTGGTTCAACATATGCAACAAACGATTTAAAATCATTGCAACACTTAAACC
CCGTGTACATCAATAAACCACGTGTCCACTAAGATGAAATTACGAAACAATATCAAAATC
CACTGCAACTCATCCATACATAGTGAAACACAATGGCGGAGGCAGGGCCCGGCCAGCACG
GGCAGCTGCCCGGGCTCCATGCCATTGCAACAATACACTGCTCCATGGCATAAACAACAT
TTATGAAAATTCTTGACTGAATGAGTATTATTTCTGTATGAGTAGTACCATTTCGACCGT
TTCTGATTTTGGCCATATGTAAAATTTGACTTTTTTTCTATTTCTTTAGCACATAATACG
GTCTACAATAAAGTTAAATTGGTAAAAGAAACTATTTTACTCACTTGAACTATTTTAGCA
AAACACTTAAACCTCTAAATAATTTTTCATTTCGTTTTATACCTCCAATGTATTGAAAGT
GGTTCCCCTTATTATTGTCTAACAACGTTTCTCCTTTTTTTTTCTCTCTACATATAATTA
ATATACGTTTGTTCGACTACCAATTTTCGTTGTTAACTTTCTCAATGTTCATGCCGTGCG
TTGCTGTACCAGTGCCGTGAGCCGGCGACTATGATTTGTGTGCATTGTGCCATTACCTAA
TTAGGGCTAGCTCTGCCGCCCCATCTGTATTTTAAATTTATATCCGCCACTGATTGTAAT
GGGGCGCGAATGATGGACATACATAGTGGGGGCGGCCCGCGCATATGGGCGCCCCATTTT
TTTCGCCGCATCAGGCGCCCGATTTTGAGCATTCGGAGGTTCTACGGCTGTGTTTAATTC
ACACTGAAGTTTAAAAGATTGGTTGAAATTGGTACGATGTGATAGAAAAGTTGTGTGTGT
ATGAAATGTTTGATGCGATGGAAAGTTGGAAGTTTGGAAAAAAAACTTTGGAAATAAACA
GGGCCTACGTGCATGGGTGACTCACGCAGCCTTTCTGTTTCTGCCACGGCTCCATGGCGC
AAAGCTGCACGAAGCGTGCGTGCTTCCCTAGTGTCCTCACTTGTTCAGTCCCTGTCACAA
ATTAAAACCAGATTATTTGCTAATAAGTGCTTACATTGTTTTGGATGATCACCAGCAAGG
CTCCGTCTTATCCTAACAACGCCAAGGGGCCACGTATGTGTAGCTTATACATATACTCCA
GAAAATGAAAATAAATATCCTAATAGTGTGAGCAGCTGCAGACGCTGACAAATGGAGCCC
ACACAGCCTCTGGTCCCCAGCTGTCAGCCCGCCGCGCCCACCTACCCGCGTCCACGCGGC
CCACCTGGCGGCGCGAGGTGGCGGGCCTTTATCTATCCATATCAATCTATCCCATCGAGT
>Os09g0438000|rbohG	Os09g0438000; upstream from -3000 to -1; size: 3000; feature type:gene; location: Oryza_sativa.IRGSP-1.0.46:9:16183282:16186281:D
ACTTGACTTCAAGGTAAAACCAGGTATCTAATCTTAACACAGTTGCAATGAGAGCCCCTG
GAAACGATGAAAAAGATTCAATCTGAGCCACGAATTTGGTCGGGGAGTCGAGTCATCAAC
GTGCAAAGTACGGTATTGACGCCAAATAGTGGTAGAAGTAGCAGCAGTAGTGCCCTCTCG
CTTTCACTTTAGTGCCATTGCATTCTGCTCTTCAACTGTCTGTACTCTTCTGTACTGTAC
TGATCAATCACTGCACTTAGGGTGTGTTTAGTAAATCTTTGATTCGTTTCTGATCATCTC
AATCGGAATCTTTCATGCTCCTACATGATCTATCAGGTTCGTTAGGATTAATTGTCTTCC
CTGTGCACTTGGAAAGGGAGCCTCAGGTTTAGCTTCAGAGAGAGATGGAGTGTACTGTAC
TTGCGAGTTGTTTAATGCTACCACTACTAGTATATATCCTCCCTCAGAAGCTTCTAGAAG
GACCCATGATAATAATGTTCTAATGCTGAGGAATTCAGTTTAACTCATCATCCTTCATGA
ACCAGCTAATTAGGCCACTGAATCAGGAGGCCACTTTGCCATATTGGATTCTTGGAAGTC
CTGCCAACACATAACGGTATGTGCGTGCGTTTATATGAGCGACTATTCGCTTCGGCCAAA
TAATTAAATAAAAGATTAGAGAAGAAAAAGAATAAGGATTGGTTTGGTTTGTGGCTAAAT
TGGCCTTCCCAAATTTTGTCAGTGCCAAATTTTGACATGTTTTGGCATGACTAATTTTGG
TAAGACAAAGTTGTGTTTGGATTGAAACTAAAATAGCTTAAGTTCACTATTGAAATGACC
TATTTTCTTAGACATGCCAAAATTTGGCTTCAAACCAAATAGACACTAAACACTATTGAA
ATATTAAATATTAGTAAACCTAATTTAGACCTCAAACCAAACCAGCCCTAAAAGGCGAGA
CTGAGACCGAGAGACCGAGAAAAAAAAAAGAGATCAGGCATCAACATCTGCAATGCAGCC
GTGTTCTACACGGTGCACTGAACCAGTAGTAGTGTGGTGCGTTGCTGCATCCATCACTGG
CTAACAAACCCTTGGCTTAGCTGCTTAGGTCGACCTAAGTCATCGCTTTCGTCGTCGGTC
AATTCGGTGTGTGGAAGTACACTGAACTCTCACCTACCTCGCCGGAGTACGTGTTGTACA
CAGCTGCTGCTAGCTCCTGCCGGTGGCTACTCCGGCGACTGGCTCTTCGTGTGCGCGGCG
GTGGCCGTCACCGTCCTCATCTCCAACCATGTGACACACGTAGGCTGTCCTTTACCGATG
CTTCCTAGCTACTACGGCCGAGTTTAGTTCCAAAATTTTTCTTTAAACTTTTAACTTTTT
CATCACATCAAAATTTTCCTATATATACAAACTTCTAACTTTTCAGTCACATCGTTCCAA
TTTCAACCAAACTTTTAATTTTGGTGTGAACTAAACACACCCTACCTTCATCTCAAAATG
TACAAGACTTTGACTATGTACTCAAAGAAGTATAATATCTGGGTAAATAACTATAGTCTT
TTATATTTTGGGAGAAAAGTAGTGACTAATAATATCATATCATGTCATTGTTAGCGACCT
AGCAATTAGTAACTGTTCATCAGTCATAACCGAATAATCCACAGGGTTTAAATGTTTAAT
TAACCAGAAATTTCGATGTGGATCTAATGCTTAAGAAAGGATACGTAGCCTTCATGTAGG
CCAGTGAGAAAAAAAAAAGGAGATCTTGAGCTTCTAGAAGGGCGATCTCTGAAAATCCTG
GAGTCTGAAGTTCTGAACATTGATCCTCGACTGTAGGTATCATATTTCAGAGTCATTTCT
GGCTCTGAAATAACACACATGCGCCACATCTAATGTAGACAAAAAGATGAGTCCCCTTCA
GAGCCCAGGGGAGAACTAAACCCAGCGAGGACGATAGCAACTGAGAGTGTATGTATTGAG
ACCAGAAGCGATTCTGCAAATGCAAAATAGTGTTGGCCCACATTAGGTACTCATAAATGG
CTTCAGAAACATCACATGTCTCTTGTATTAATTATTGTTTCCAGATGTTCTTGGACCGAT
GATCAGAGAGAACATTATGTACAGGCACGCCTAACCGAAGTCTGAACGCTGGAGTTTAGC
ACCTGACAGCTGCTCACCGTCTCCAATCAACTCATCACACTAAGATGGTACCAATAACAC
TCACAGCAAAGTGACAAGGTGCACACAAAGAGTGGCAACTCGCTACTACATTACAATGGA
ATATAACAACACGCATACTTCCCGAGATCCTAAATGCTGCGATGCAAAAAAAGTTCTTGA
AATATCAATTCAAATTCAAAATTCATTTCTTAACCTTAAAATAGTCAATTAATCCGTTTA
TATTCTCGTACAATTCAGCATTCCATTTCACTCCATTCAACCCCCAAAAAAGAAAGACAT
ACCCCCGAATTAAAGGAAAAACCTTTTGTGATATAATGTTTTCATAAATTGTGAGACCCA
TATAAGGACAATAAGTTAGATGATCTAATTTCAAGTTTGATGATGCCCTGTGAACATGTC
TCGGCCCAACCCCAACTAATGTCAGTACGGCACCTTGGATTCCCCACCCCGCTACACCGC
CAAAAACCGCAAGGCTCCGAGGTTTTTTTTCCTTCACCGAACGCGTCTCGTCAGTCATCA
GTCGTCACCGCACGCACTCGTGTCCCGCGGAGCTCATTTCTCGCGTGTCGTCCACAGCCA
AAAACCCAACCCAACCCAACCGCGCGCGCCGAGCCGTGGACGCGAGCCTCTCCCCGCACC
AACCCCGCAGAAAAACGAGAAAAACACCGCGCGATTGCGCGAGACGGAGACGAAATCACC
GCACTCCGCACCGCACCGCGCCGCGCGCAGGCAGCGGCCGCGCCCACGGGATAGTCGCAT
TATACGTATTTAGTACTACTAGTATATATCCTAGTAGGGGGGGGGGGGGGGGGGGAAGGA
>Os02g0465900|OsARP	Os02g0465900; upstream from -3000 to -1; size: 3000; feature type:gene; location: Oryza_sativa.IRGSP-1.0.46:2:15679461:15682460:R
AAAGAGCAGCTGAGAGGTGGGGCCCACAGTTTGGCCTAACCACCATAGACGCCACCCTCC
ATCTGCTTCCACGTGGAGGGCCTGGATCACTCCCCAATGACGGTTGTGGGTGAACCAACC
TCCACAACCATCATAAACACCCTATAAAAGAAGGAGAAGCTCTCACTTTTAACTTGCACA
ACAATGCGAAGTACAAGTCATTTTTATATTTTAGGCACCACTTTAGTATGTGGAATTAGG
TAGAGAGTGAGGGGAGCTCCAGAAGGAGTGCCCAAATATCGGAGTTCTCTCCGGGAAGTT
GGTTTTGTCAACATTCTTCCACTGGAGTTCCGAAGAAGCACTGGAGTTGTTGTTCTTCTG
CTCTCGCTTGTACCTTGGCGGATGCTTCTTTCAATAAAGTAAGTATTCGATATCTCCTTA
TGGTATTTAATTTATTTGCTTGAGTGAGTTATATTCCCATTGTTGCGGGTTCGTCGCTTA
ATTGAATTATTAACTGCTCTAGTACTAGGACTCTGGATAAAAAAAAAAGTTCATGCGCGA
GACTAGAGTAGTAATCAATAACTTAGGCGTGATTTATAGGTTAGCGGTTACCGTGTGCTC
CACGAAAAGTGAGGTAGGCGGCAGGTCGTGACAGTCATGTCTGCCCTTTGTATCCCTCCA
TATTCGGGTACATCATAGAGCCGTAGGCCAGACTCAGCTTGAGAGACCAGTGGAGAGCCG
GTGTGCCCGAAGCAATCGACAGAGTTTTACCTTTAACTCAACACTAGTAAATTAACCCAT
AGGAATCCTTTTTAGTCTAAGCCTACCCTTAGTTGTTGTTCTTGGATTGAATTATGTTCT
TAGATATACACACACATTCCCTATGATTCGATACTCTTGGAATGCTATGAGAATGTTAAC
GCCAAAATTTGATAAGATTCTTTAGTGGATTCGGTTAAGGAAAGATTACAATCAGTCGAT
TAAAAGCTTATCCAGAAGAGAACGGGTTCGAGAAGGAGTCACGAAGACCACGACATAGCA
GCTTGAGTTTATATATTAATTAGGCAAGTTTTGTATTTAGGAAAGTTTGTGTCATGTCCA
ATCAGAACTTATGTTTTTCCTTTTATCTTTTGGAAAGTTTGTGTCGTGCCCGACTAGGAC
TCTTATCGGCCTATGGGTATAAATACGTACACCCGGGGTCCCTGTAATCTATCTCTCGAT
CAATACAACTAGTCTTGACGCATCACCACCTTATTTTCCAAGGTTTTTATTTATCACCGG
CGGAACTTGGCACTTAACACGGGGCTGCATCGGCTTCGATCTCCTTCAAAGGAGTAAGCC
CTATGTTCCGTCGGCCCTTGAATTATGTCGGCTGCATTGGTGTTATTCATGGCTGTATCG
CTTTGACCTCTTGGATCACTCTGGTTCGGTTGATATTTTGCCTAACTGATATTTCGATTC
TATCTTTAATCACATTGTGTTTAGAGACACATTAGTTTAGTTGAGACTGTATCGGTTAGG
TCTGGTCTTCTGTCTTAGACGATATATCTCTACAATTACAATGTTGTTTTAAATATATGT
GGTATGTCCATCATGTTTTCATAGGCTTATCGGCTTATTGAGTATTAGATTATTATATAC
AATCATCGGTTAGGTTTGACCTACTACATTATTGTTGATAATCTAAGTATTGTTAAGTCG
ATAGGTTTCTTACCTATGTTTTATCGGAGTGCTAGCCAATAAATTATTTGTGCACCAGAC
TTCCAGCCAACGTAAGTTTTAACCACTGAGCCAACATTTAATATTCAGCATAAATATCGT
CGATTGGTTCATCGGGCATCTACTTCATTATATTATAATCGGCTGATTGGATTGTTTGTT
AAAGTTCTATCATTGTTTATACAAGTGTTAGAATCTATATCGGACATATAGTCGATTGTT
CAAAATTCTATGGACATTGGCTAGTATCGATATCAGCTAATATCGCTACATTTGCTTGTT
AGCCGATCGGCTTTTCGATCATTTACATATTTATATGTCTTGTTAGTCGCAGGATCAAAC
TGACTAGCACGCCCGTATCTCATCAATAATTTAGAACCTGCACTAGCGTTTTTTTTCGGA
GACCTGCACTAGAGTTAAGCAGATCTCCCAAACAATTGTGTTGTTTTTCGCGTCAATGGA
GGTGAGTGTTACATCGATAATGGTGCGCTTGCGAATTTTAGATGTGACCGTATCACAACG
ACGACTATGTAGTTTTTTTTTTTTGTTAGTTCTCAACTTTATCTTTCTCTTTTTCACACG
CATGTTTTCTCAACTACTAAATGATATGTATTTTACAAAAGTATTAGTAAGAAAGTTACT
TTAGAAAATTATATTAACCAAAATTTTAAGTTATTTTAATTAATACTTAATTAGTTATGT
ATTAATCTATCGTTTTCCATGTTGCATACGAAGGGGAGGAGGAGTTGAGAATAAGTCACA
TCAACAGTAAATAAAGTCAAACTCGCGACAGGCGTGGCCGACCTCAACCACACCCGACCG
TCCACTGAACCGGGACATCCTCACGGCTCTCCCCAATCCCCTATCCCCCAAACCCGTCCA
GATCCATCGTGCCAGCTACTATAGCTCCCAAACACCGGTCGTAACTCGTAACCCCGTACG
GAGCGTGTCGGTGTCCGGTGTCCCCCCGTATCTCCGTGCCCCCCCACCACCCACCCACCC
ACCCCCGTCACGTGCCGGCCATCCCAACCAAAACCAGCTCGTTTTCCGCGAGAACCCACG
CCCCCCTCGGTCTCCCCTCCGTCTGCAGGGAGCCAGACACACGGGGTCGCGGCCCTCACG
TGCCTCGCGCCGTGCGGCCCCCATCGCCGTCCTCATCCTGATCCTAATCCCAAGCGACCG
CGGCGCGATCACGCGGCGACCAACCATTTCTCTCGTCGACGAGACGACGTGCCCGCCGCT
CGCCACCCCCCCCACCCGCTCGCGCGGCATAAATACAGCACGCCACGCCCATCCCTCTCC
>Os06g0528600|OSSPDS2	Os06g0528600; upstream from -3000 to -1; size: 3000; feature type:gene; location: Oryza_sativa.IRGSP-1.0.46:6:19611314:19614313:D
CAAATATTTTTGAGTATTAGTGTTGGTATTTCTTAACATCACAGATAAAATTCGCAAGCG
CACGGAAGATACTGATGTAGCACTTCACCTGGGAGTATTCCAAGGAATCGATTTCCACAG
GGAACATGTATGCTCAGCTCTTCTTTAGGTTCATCCAAGGACACAAAGCAAATGTAGGCA
AAAGGTAGAGAACATTTCCTAATGAGAAACAGTGTCTACGGAAAGCTCAGTTTAATCCTA
ACGTGATACTTCAGGCACTAGCCAACCCGTTGCTTCCAGATATCGCTCTTCTGCGTACCC
GGACAGAGAGGACTTTAAGTATTTGAGGGCTGTCACCATCTCTACACCCACCTCAAATGG
AATACGAAACAACAATCAGAAATTAATTACCCAGACACCGCGTCAACAGAATTAATAACT
ACTCTAGTGCTTATAACTCACTAAAGTAATCACTATATTTTAATGAACTATAGTGAACAA
TGATCTCGCACACTAATTAGGAACTAACCAAGAATAATTCTCACAAAGTAAATCTTAATT
ACTCAGAATGATATTTCTATTAAAGCAGAGTAATCAGCAAGGTACAAAAAGTAAGAGGAG
AATTACCGACATTCCGAAATTCCTCCGACATCTTCTACCTTACTCTCTTCATAATCTAGT
ACACAATAAAGTACAATAGAGCCTCTTGTAATTCAGCTCATGCTTTAGTGTGTGTGACAG
TGTGAGAATAAGGGAGGAGAGGGGTATTTATAGGTGGAGGTTGCTTGGGAGGATAAGGAT
GCTCCATGGAATCCAAGGAGCATCTTCCATCTAACTTTATCTCCTTGTGCCAAGTGTCCT
CTGGTGACAGTTGGAGCGCCGAAAACGGTCACAACCATCATTGAGAGGTTAGTAGCTACC
TAACTGAACTTGGGCCTGGACTATCGCCTCTGTCAGGATTCGGCCGAACCCTGGCCAGCT
CCATTGGCCCCCAATTTTCGGTCTAGACACTCATTTTGGGGCTCTCAATCCATTGCCATG
GTGGTTAGGCATATTTGGAGGTGTTTAATTGGGTTTTTGGGTCCAAAACTCCATAAGTTT
GGATATAAGTTTGATTCTCCTCCTCCTTCATGTATATTTCCTCTAAAGTTTGGTAGTTTG
TCACCTACATCTAAATATACACCAACACTCGTAGAAATTGTTAGAAATATACCATACTAC
TATGTTGGATGTTTTATGTAGGTATTGACGGTGTGAATTTGGTACTTAACAGCCGTCAAT
AACTAGGTCTAGTATTTAGGGAGTAGGTATCGTCGAAATTTTCAAGAGAATATTATCTAT
ATACCGATCTCTTCTTTCACCTGGGCAGTTGTGCAAGTAATACATTTTCTCTCCCCCCCC
CCCCAATTTGTTTTGGCCCTATTAATAGTAAGAAGAATATTTCTTGCTTCCTCCTCCCAA
ATGAATCCAATTAGTAGGATTTGTGTATTTTTTTTAGAAACATGTATTTATTTTCAAATG
GAGGGATACTTATAATATTAAATGATTTTCCGTGAAATTTGTGTGTTCCGAATGTCCCCC
CCCCCCTTCCCCCTCCTTTAGGAGTTCTCTAGCACCTTCCTAGATATTTGTTTGTTGGAC
TTTTTAGTTTTAAAAATGACCGGTTAATTTTTCCTGTAAATGTAGTAGATGACTTTGGAC
AAGTGCATAAATAATCTACCATAGTTATTGCGTAAAATTTAAGAGGTTATGCAAAAAATA
TTACAAATGGCGTTCATATAGAGGGAATTAATATTGGCTATTGAAAAATGACCTCATCCT
CTCTTTTTCCCCTTTATTTTGCTTCAAAGAAAATTCAATTTAACATATCCTTCTATAGAT
AATATTTTTAAGGGAAAACACTGTGGGGAAGCCCCCACAGTAAAAATATATTAAATAAAA
AAAGAAATTACAATAGGTTTATCCAATGTGAAAGGATAGCTCTCTCATGTACATTTAATC
TATAAACCAAGAGGGGGAGATCACTCTCCAAAAGGAAACAAAAGGAATACATTATCAAAA
AAATTAGTCAATAATTGTGCTATATATCCAATTTCTTACACACACCCCATTTGCATTCCC
TTTGGCTTTTGATTAGGTTAACTTGGATTGGGTCTATTGCATTAATGGATTTGGAAAATA
TCATTTAGAGAGGTCGAAAAGAACCATTACGTTCACTTTAAAAGGGCTAAAAATCACTAT
ATTAATCAAATAAAAAGATAAATACTTACACCATTAGATCGTTGCTGGTCGAAATTATAA
TGATTAAACAAAATTGATCGATATAACTATATATAAAATACAAAATACATTTTGTATCCA
TGAAAATAAAAAATGAAAGAGTTGTACATTGGATACGAAATGCAATTGTACCTATGTAGT
AATTAGAGCAGGTACAATACTAGACTATCCATCAGCTATAAACACATATTGAGGAGATAA
AAAAGAAGAGAGAAAAACAGCAGGCTACAGATTTGTAGCCAGCTAAACACGAACTGTAAT
ACGCAATGTATGTATAACAGGTGGGACCAGATATCAATAGTGTAATATATATTTATATGT
AATTATTGTATGTATTTGCTATTAAATTAATTATAGATGATTTAGAGCTAGCCGTTAACT
GTAGTATTAAACTTGCTCTTATAACAGTTAAGCATATATCAAATCCAACTGTACCATAGT
TTACAATCATGCAAGGACATGAATGCAATTTCTCTATATTCGAGGCGATATCCCGAGTTC
TCGCCCTCATCACGGCAGCAGAAGTACCCGCGGAACTGCGGCTATTTTATACTGACCCCC
CTCCTATCTTTCCAAAATTTTCTCGTGTTACTGTCGGCGCCGTTTAGACTTGAGAGCTGT
AGCCGAAAGACACCAAAAGCAAATTATCCCTTATTTAAGGGTGTTTGTGTAAAATTGGTG
CCGCACGAGTGGACTGGGAGCTCCCTCCCTATTTCTTGGTCTCGTCTCGTCTCGTCGTCT
>Os07g0524900|Os07g0524900	Os07g0524900; upstream from -3000 to -1; size: 3000; feature type:gene; location: Oryza_sativa.IRGSP-1.0.46:7:20367833:20370832:R
GGGCAAGTACTATAAGCCTCTACATGTTGTCCCTAAATTTGCCACATAGTATTAGGTGAT
GAGTTGGAGGAGAGAAGTTAGAAGAGAGAATGAGCCACCCCTCATGCAAGGGGCAACCTC
CTCACAATTTCTAAAAAAAAGTAAGATGATGTGAGAGTAAATTAATATTGGGGTTTGTGT
ACTAGAAGTGACATGTTGTATTTGTTACCTCTTAATTAATGAGAAGATGATATGGTTTAA
ATTAGATGTGGCACCCACCTCTACTATAAAACTTGCCCTCTGGCCATTCCTAACCCAAGA
CACTAGACATAATTTCCATAAACTAACATCATCAAGAAACTAGTACTAGACACTACTCTT
CCAATACAAACATCACTATTCCATACTTAAATTCAATACTACTTATCTCACATGATGTCT
TGGATGTTATGTAGAAACCATGTCTCATGCAAGATATGGTTTCCTTCTCTTTCCTCATTT
ATTCACTTGCCACATCATTTTTTATCTAGGTGGCAGCTTATTTAATGCTATATACATCAT
CCTAGTTATTGGGTTGGGAATGGCCTTATGTCACCAGTGTAAATATTATTATGCTACAGA
ATGATGACATGAAAAAGAAGACCCTTAATTAAATTTTATATACCTTCCAGGGCTTGAAAG
AACCTATATGATGAAAGGTAAGATACCACTTATTAAGGAATGCAATATATTACCTTCTTA
CCGCCTACGTATGCTGCTCACGTCCTAGATTCCACTCCTTTGAGCTCAGCAGCCATGCAT
CAGCCATCAGAACCATAAAATTTAAAGAAAAGGGAAATATTCTGTGTTCAGTCCACGGCT
ACTAATTCCATTTCAGATATCACAAGTAAAATTAAAATAATTTAGTGTGTGTGATCGTGA
AATACGTGTGTGTAGGGTGTAGCTAGACAAAGCACTTTCAGCTTTGAACGTGGTAAAGGT
GGTCATACATGCATCTTTTCGTAAAGAGAGAGAGAGAAAAAAAAAGAAGATTCAGAAAGC
TCACATTGCATCTACTGATGTTGAAAATCCCTTTTAATTTGTATCCAAGAGTCCGAAGGT
TACAGTGAATCGACATGACTTAATTAGGACTACATGGTTATATCATTTGTCAACAGTCAA
CAGAGATAATAATAGTGTTAAAGGCCATTCCGATCACGTAGTAATTCCTTCTATCCTAAT
TTATCATCATATATTTTTTAAGGTTATTTTCAAATGATTATCGTATTAATATTATTTTCC
TAAGTCTACCCCTTATCCCCCTTATCTATGTACGAAAGTAATAGATATTGGTGCATGCAT
TCCCATGCATACAAGATTTTTTTATCAGCATGTAATGTATTGGTTATTAATTATTAGCTA
AAAAAACAGTGGGATGGTAATACTAGAATAAATATAGTACTTGAGAGTTATTTGACTTTC
CTTGGTCTTGGTGCATTCTATTATGATCAATTGAAAGGCAAAGGAGTACTCCCTCCATTT
AATAAAACAAACACAATTGGTGTCCAAATTTGTTATACTAAGTTCGATTTCTTTGGACGG
CTGTACTCCCTCAATTTCTTTTGACCTTTTTCTTACTCAAACTTTTTTAAATTTGACCAA
ATTTATAAAAAAAATATAGTAACATTTTCAACACAAAACAAACATGTTATCAAAATATAT
TTAAAGTTTTATATAATAAAACTAATTTGATGTTGAAGATATTGCTAATTATTTTTATAA
TTTGGTCAAACCTAAAAGTGATTAAGAAAAAAATCAAAACAAATTATAATATAAAAAGGA
GGAAATAGTTAATTATTTAGAAGACCATTGCTGGCTAAAGTCAATGGACTTATAACATGT
TAATTTGCCAGTAGAACATGGGAGAATTTAATGGAGATGTCAAATTAATTAAACCGATCA
TGTAGCAGGCAGTCAGTCAGTCAGTCAGCTAAGCAAAGACTCGAAGTCACTTGCTATCGG
TCACTGCGAAATTGTAAACTATTTCCTAACGGCGCACATGATATTCATCCCAAAAAAATA
ATAATCATACGGTTAGCCAAGGAAGCTTCACCAAAGGGTATTATATAGCCTAAGCTTTTT
GCCCTAAACAATTTCAGGGCACTCGCGCTTTATCCAACAAATTGCCATTCTGCTGATTCA
AGTGGCAGTTTTGTTTTCGTATGTGGCCAGCGCACTACTCGTATATCTTTCAGTTAACAT
GACCATTGCACCAATTAAAATCTGATCTTTTCTTCGGTTTCTTTTAAAAACTCACTCATG
AATCATGATATCCTTGCCGTCTCAAAATCCTGTCTTGTCAACCTAACCTGAACCCTTTTG
CACACACACACACACACAAAACTTTATCTTTCTTTTGTTTTTGTTGTAAGCCCTTTTGCC
CATACTATGACCACTGTATCAACCTGAAAATTGTTGTTGATCTGATCTGATCTGATCCAG
CATGGATCATGCAGAATTGAAGCAGAACATGCTAAGAAGCTTCAGCTTGTCTCCTCCTTT
GCATATCTCACTTCAGGAGGTGCTTACATCCAGGGGTGTCAAATTTTTAAGTATCACATC
GGGTATTATATAGGATGTCGTATGGGGCGTTCGGACGCTATTAAAAAAACTAATTACAGA
ATCTGTCAGTAAACCGCGAGACGAATTTATTAAGCCTAATTAATCCATCATTAGCAAATG
TTTACTGTAGCACCACATTGTCAAATCATGGAGCAATTAGGCTTAAAAGATTCGTCTCGC
AAATTAGTCGCAATCTGTGCAATTAGTTATTTTTTAAACTTATATTTAATACTTCATGCA
AGTGTTTAAACGTTAGATGTGATAGGGTGTAAAATTTTTGTGTGTGAACTAAACAGAGCC
TTAGTAGAGTCTTCAGTGTTCACACAAAATGACTAACAGCTAGGCTCTATAGCTAGGTAG
CTACCACACACACACAGATAGTATATATAGGGAGCTTGGTGAAGCATACACAAAAACAGT
>Os01g0639900|BETACA1	Os01g0639900; upstream from -3000 to -1; size: 3000; feature type:gene; location: Oryza_sativa.IRGSP-1.0.46:1:25693671:25696670:D
ATGCCACTAAAGGCATCAGATGCGAATTGGCGCTCCTTTCTCCTTTCAAGGAGTAGGCAT
AAACATAGGCTCTGCAGTAGTTTCATCTGAAATTTTAAGATCAGCTGAGGTCTTCCAAGA
ACCCATGTTCTTGGAAATCACATGTTCAAGCTTTAAAATGCATTGATAAAAGGCGGATAT
CATGGTAGCGGCCATTTTAAAATGCATTGATAAAAGGTGGAAAGAAAAAAAAAACATCTC
CAAGTGTACCTTGGATTGTGAGAACGATAAATATTCTAACAAAAAATTTGAATGCTAGAA
CGACAAGTAAACTGAAACAAAGGGAGTATTAGTGAAGATTCAAAGCAGTAGTAAGTAACT
AATTTGAATGTTCATAATGATGATATTGTAACATAAACAATGATAGAATATAAGGTTTAA
GGTTAAGTTTTCATAACACACTATACCATTTATATTTCATTTCCGGAGTCCAAACATTAC
CGAATCGGAATAAAATGGTCCTTACAAAACGGGGACAACCTATACGGTCAAAAATCTCAA
TATGGTTTTCATTCATGTTTTAGGTTGTGTTCTTTTGGCAGTTGAGAACATTTTCCTAGC
ATGCAAAACGAAGCAATGGACAAACGTATGATTAATTAAGTATTAGCTAAAAAACTTAAA
AAAATATATCAATATAATTTTCTTAAACAACTATCTTATATAATTATTTTTTAAAAAAAC
ACATCGTTTAACTGTTCAGAAAACATGCGCACGAATAATGAATATAGAACTTGGGAAGAG
GGAGTATAGAACACACCTCTGCTACCGTACGTAAAAGTGGCGTAGTGGTAGAGGCACTAC
TACAGAAAGTGTTTTTCAGTACAAGGGGGTTATTAGTTTACATGCGGGCGGCTTAAACCT
TATAAATTTCTGTACGAGGGGGTCATACTATGGTGGCCAAAATCTATCTATTAACTTATA
AAAGTAATAGAAAAAGGAGGCTCCAAGTTCGCTCTTATGACTTAAAAATTCTCACATTAA
TTAGAGAAAAATAAAAAAAAGAGTCCATATTAAAATACATTTTATAAATAATTAAAATTT
AGAACTAAAAAAATAAGAAATATGGAAGAGAAGACTAGAGTCCATGTAGATATACAATTT
AGAACTAATTAAAATTTAGAATTAAAAATAAGAGATTAAAACTAGAGTTTAGAGTCTATA
TACAAATATAATTTGTAAATATATAAAATTCAAAATTAAAAATAAATAATATTGTAAGAA
GAGTCTAGAGTTCATGTATATAAAAAAAATAAAATGGCTAAAATTTGAAACAAAAAAGAA
AATATTAAAAGATGGGTTTAGAGTCCTTAAAGAAATATATTTTACAAATGAAATAAAAAA
AAAGAGTCCATATTAAAATACATTTTATAAATAATTAAAATTTAGAAAAAAAAAAGAAAT
ATGGAAGAGAATACTAGAGTCGATGTAGATATACAATTTAGAACTAATTAAAATTTAGAA
TTAAAAATAAGAGATTAAAACTAGAGTTTAGAGTCTATATACAAATATAATTTGTAAATA
TCTAAAATTCGAAATTAAAAATAAATAATATTGTAAGAAGAGTCTAGAGTTCATATATAT
AAAAAATTAAAATAGCTAAAATTCGAAAAAAAAAGAAAATATTAAAAGATGGGTTTAGAG
TCCTTAAAGAAATATATTTTACAAATGATTGAAATTCGAAATGAAAAATAAGGAATATTG
AAAGAAAAGACTAGAGTCTAGGTATGCAATTTAGAACTAATTAAAATTCTGAGATAATAA
AATAAAAATAAAAGTAGAGTTTAGAATCCATAAAAAATACAATTTTTTAAATACTAAAAC
TCAAAATTTAAAAGTAATTAATATTGGAAAAAGAGTTTAGAGTCCATACAGTAATATAAT
TTAGGAATAGCTGAAATTCAAAATTTAAAAAGTAAAAATATTGAAAAAGGGGTTTAGAGT
CCATATGTCAGTGTTACGGTCCACCTTAGGATTTAGGAACATAAACTGACACATCACAGG
TGGCCATCTTAAGCTAATGGGCCAGCCGCCCAGCTCGTTTCTATCTGCAACATAAGGCAG
AAAACCAAGGCCTTGACATTTCTTTTAGGACACACGGGCTGGAACGGCCCCGGCCCAATT
AATTAAATCCTGCTATTGAAAAAGGGTTCTGTAATTAGAGTTCCTACTACTATACATACT
TCCGCAAGGTAATCTAGCACCCAAATCAAACTACAGCCAACGTGTATCATCAGTAGATTC
CACCCCAAGATCGTGTGCCCGCTCCGATCGGCAGAACCTAATCACGACCAATCCGTCGCC
AACACAGCCACAAACCCACAATTACGCGGCGGTGCATTCTCGTTGCTTTGACGGCTTCGC
TAAACGAAAGATATTTACCGTGGCTAAGCAAGCCCTGATCACACGTTCCACACCTCGCAG
CGCCACCACATCCGAGCCGATCGACCGGCCCAACCCCCCCGTGAGACAGACTCCAGAGGC
CGCGAGCGGTGGCATCGTCATCGCAATATCAAATCCACATCCACATCTCCATCGAGCGAT
CCACCCACAACCTGCAACGGCGCGACCCAACCGCAAAGCCGCTCGCATTGAAACCCGCGT
AGGTTGCCTTCGTTTTCCGCCCCGCGGCGGCCCATCATCCGCGCGCGTGTGGACCAGGAC
GCGCGGGCGGGGAACCGTTGGCCACGGCGCCGCGGCGCGTTATCGCGAGCCTATCCGCGC
GCGTGTGGCGCGCTGGGTGGGTGAGGCGCCGAGTGGCCCGGATCCACCCGCCCAGCCGGG
CCGCACGCCCCCCCTCGCCCCAGCCACCCGGCGCCGCGAACGACCCATCACCAGTCACGT
ACGCACCGCTCGGCGCTCGCTAGCTGCCACCATCTCCCTCCCGCTGTCCGGGGGCGCTGG
TTGTCGGCACGCGGGGGCGCGGGCGTCTATTTGTTGCGCGCGCGGGCGCGGCGGCGAGAC
>Os01g0733500|RD22	Os01g0733500; upstream from -3000 to -1; size: 3000; feature type:gene; location: Oryza_sativa.IRGSP-1.0.46:1:30586859:30589858:D
GGAACAGACGAACAGAACACATACAGGGAAGGGCTACGAACTATAGATTCACACTATTTT
TTGAACGGAATTTTTTTTTGAACGGAATAGATTCACACTATAGCTCTCTTACCACCTGAC
AAATACATAAAGCCCAACATGAAGAAGTAAAAAAAACATCCAATGGAGCAAAGCTTCAGC
TACAAGGATGCACCCCATCAAGCCCTGTTTTAATCCAAAAGTTGGGTCTATTAATCCGAA
TCTGAATAATTCTCCATTCCACCACAAGGCGATCATTGTCCTGCTGCTACTTTAATGAGC
AAGTATCATTTGGCGATCAATCTGTCCGGTGCTCAATCTTTCCTAGGTGTTGCAGAGATC
TTCTCCAATTTTCCCCACTACAAGAAGTGAAGAAGGTTTGTACGCAAGTAAAGCAACTGC
AAAAAATGTGGCAGGGCCGCAGGGCGATCTCACCTCCCGCCATGAACAAGATGACTGTTA
GGTTAGGTGCAACGGCCAAATTACTCCTTCGAGTACTGCGAATAGTGTCCATGCTGGTGC
TCATGGGGCCATTGCTGCGAGTCCGGAATCATTTGGATGGCCACTGTGCCAGCTTTGTTC
AACTATCTTTGTATAGTTCCGACACGCACACCAGAATTAATTGTTGAAACTTATTTCGCA
AAAACATAATTAACGATCGAGTAGTTTAGTTAACCATCGCATCTAGAAAAGGTGTTTTCC
GTGGCAAATTAAGGATGGCTTCGCAGTCACTCGCACGTAACGTCGTACTACCAACCAACG
TCCAACCTCCACGACGTAATTAAGGAGAGCCGTACTGGCTTACCGCCAGTTTAACGTCTC
GTCGTGGATGCGAAGAATAGCCAAATCGATGGTAAAACACGGCTCCGGTGAAAAATAACG
ATGCAGCAAAAATAAGAAATCCGATTTAATCCCATTTCCTTTTTGTGTTTAGTACATGTT
GTTTCTTCCTTATTGGCACATGGCAATGTGGTAATGTATTTCCTCCATTCCCAGATATAA
GAAATCTTAGGTGGATGAGACACATGCTAGAACTATAAATCTGGATAATAAAAATCTGGA
TAATAAGATATTCAGATTTATAGTATTAAGATATGACTCCTCCACCCAATAAAATTTATA
TTTTGGAACGGATGAAGTATTTATGATCGACGGCAAGTATTCTTAGGTAAATGAGATACA
TGCTATAACTATGAATCTAAATAATAGCATCTTTAGATTCGTAGTATTAAGATATGACTT
GTCCACCCAAAAAAATTTATATTTTGAGATGGATGGAGTATTTATGATCGACGGCATGCA
TTCAGATGCCATATCATTCATCAGGCAGTCTTTGAAGATTTGTCGGTCTTTCAGACAAGC
AGTGCAACCAGTGGTTTAATGCCTCTGGAGTTTGGAAAGAATCTGATATTGCGGCATGGC
GCGTTAACCAACTCTCGGTGGTTACTGGCCAGAACAATGGTACATTCTTTCTCTCTTTGG
GTGAAATCTTCCATCGTCACCAACTCACCGTCAGTCATGATAATCTGTTTGCGACCAAAA
CATACTACTGGATCAGATGATCAGATCGCTTCACTACGTAACTCACCATTTCTTTCTAGT
GTCGGTGCAGCTCGATTGGTTGCTACTTTCAATGGATCAGCACAGTGTATGTCATAAACT
AGGAAGCATTTGCAACGTTGCAAAAGGACCGTACACAAGCAGGTAGAGTTTAGTCATCCA
GATCGCATTACATTAAGCATACTACAAAGTACTAGTAGCTCATTTGAGGGGATGGTTCTG
GAAACTAAGTACCTGCAGGGGAGAGTAGGAAGGTAAAAGTCTCGATCTCGATCACTTTCA
GGCTTGGTACGGTGGCATTGCGCTGCACCATGGGAGAAAGCAGTTAAGAGCATCTGAACA
TCAGAACATGGGTATGCATAACAAGTAATTGACCCTAACTAATGACAGCTGAGCAGTGTT
TTGTGCATTAACTAACAGTCTCAACAGTGTTCTTAGGAAACAGCAGCGTACTTCTGATCC
ATTTGCTTAAACCCTAGGTTAGTAGAACCATGAAATATATCTGGAGAAAGAATCCTTCGC
CAACCATGAGTCAAATTCATGATCCGGCGGCGGAAAGGTGGTGGGTGCGCGACGTATGGC
AGGGGAAATTCAGCTCTTGTTCTTCAAGTTCCTGCGCATGTCTCCAGCCAACTCCCAACC
GAAAGTGAGACGAGCTGCCCAGTTTTCCACACTCCATTAGTGGCCATTCAGGCTTGCTAC
ATGCACGCAAAGTCGCAAACAGCATTGCTCTGTCATCGCAGGACTGTTTAGCTAATTAGG
TTGCGCCATTTGATACACGCACTCGCTTGATCTAGCCCGTACAACGTGCACGGGTACATG
CCGGCCAGCATGGCTAGATTTAATAACTTCTATGGACAATATGTGCCCTGAAACTACATC
CTACAACCACCAGAGATGGACGCTTAATTATGGTGTTCATCTGTTCGATATGGTCCATGG
ATTGGTCCGGTGATTGCTTGCGTTCTTATACACTAGAAGGATCGGAGATATGAGTTCACC
GTGCAACCGTCAACCGGAGGAGATCCACGCGTTGGCAATGCGGCATACCGGCATCGGCAT
GGGACGGCGACGGCGACGGCGATGGCCGGCGGGCGGCATTCAATAACGCGAGCTCAGCTG
AGGCAGGGACGGTTGAGCCAATTGTGGCTGCGTTGGAGTCTCTGTAGCTAGCACCGGTAA
CTGTTAGGTGTACCATCTCCGGTGATCTCCGCGTGTCAGCATTCAGCAACACAGCGATCT
CTAGCTAGGAGCAGAGTAAACACACTGGTTACTTGTACTGTTACAGGCATAGCAGTGGCG
CTAGTGCTGCTGTATTGCTCAGCGCGATTAATTCATCGGCTTGTGCCAATTTAATTCCCC
CAACTCCCTAGCTACTCCCTGTCCCGGTTCTATAAATAAACCCGGATCTGTGTTGGTTGC
>Os10g0516100|OsGDCH	Os10g0516100; upstream from -3000 to -1; size: 3000; feature type:gene; location: Oryza_sativa.IRGSP-1.0.46:10:19891753:19894752:D
GTGGTGATCGACACTCGACAGGACAGACAGGGGTGCAGAGATCATCACATCACACATGTC
CAACAACACCATCTCCCGGCCTCTCATCTCTCTCGATCATGGCGGCAATGATGGATTCGC
CATGGATAAGGTGAGGTCCAGAGCATGTGAGCTAATGCACAATCTTATCCTCCTCCATGG
TAGACCAATGGCAAATGGCACTATCTCTTCGATCTTGTTGTTCTTGGAGAAATTAATTAA
TATATAGAATGGTTAATCGCTTTGAGTGCATTGCAACTAACAGAGCAGTAGCACGTTAAC
CCTGCAACTAGGTACCAATTATGCTCTGCGAAATGCAAGGTCTTATTGGCCTCTCGATCA
ATCAACATGTATCTACTACTACTACTACCACCTACTGCCAGCTTGGCTGCTTGCATTGCT
GATAGATCACTCGATTACCGGTTAACAACGATGATTAAACCAAGCCACATACGCAATCTC
TGAGAATGACTGTTCCAAAGTAACACTGTGCATTTGCATGTGGGAGATTGCTAGAGTAAT
TGGCAATGCTGATAATAACATTCTTGATATAAATATATTTGAAAGTACCGTTTGATGGGT
TGACCTATCGATGGAAGTGACCAAGTATGTCGAGGATGTCCCTCATGCTGCTGGATATGA
CCACAGCATTGCCCCAATGACAAGTGTTTGGCATGTGCCATGCTTCCTCTAATTAAACTC
CATTATGGATCAACGCAGAATTGATGTTTCTGCATGTTAGGATGAATAATTATAGGTTGG
TTGATGATCACAGCAGCAATGCAGTTGGGTTGTTCATGCAATTCCCCCTTTTAGCTCACC
AGCTAGGAACCCTTTATTCTCTCCTGAACTGTTCATTCCATGATGATAAATATATATATA
TATATACTCCTAATATGGATCATCGGTTGATCAATGTGAATCATTCACTAGGTATGCATG
CAGCAGCTGTTGTTAACTAGTCTGTTTTTTCTCTGTTGTTGCAATGGCAGTTAGCATTGT
GTCAACCTCATGCTAACATTTAGCATGTGCTTGTGTACTTTGGATGACACAAACTTATAT
AGTTAAGCTTCCATCTAAAAAATGTCTGTGAATGACGTCTGGTAGTAGGTGGATGTGACA
TAATTACATATAGTTTTTAGTTAGTAGTTGAATAATTGGATTAACAAATGCCCCTCCTCA
AGTGCATGCAAAAGGTATCCTACTTTCTGATTCATTGTTGCATTGCATTGCACCCCGTGA
AGAAGTAGCTACTACAATCTGGACTACTTGATGTTTGGTTCTTGCAGCTTTTTCTTGAAC
AACCTGTACTTAGTTCAGTTGATATATATCAGCATGCAAAGTTTATTATTGTTCAGTGCT
ACTTGCAAGTACATATCTCTAATATATACTAACAATTACTTATATGAATCATTCGAATGC
TAGCAAGATATGATTCTCTCAAGGTATGCATTGCTGCAGGAGCAGATGAAGAAGAGATTT
TTCACTCACTCTTTACATTGCAAAGGACAGGCATCTTTTTCTGGCTCCAATAATCAGATG
TAGCAGCAGCTATTAGCAATGAAACCTACAGTTGATCCATCGATCACCTGATCATGTAAC
TGACGGATGCATCTGCAATGCCAACTTAATCAGTTAATTGGTGGTCTCAGGTCGACATGC
ATGTGATGTGCTCCTGTTTAGGGTATCAAAAATTAAGGCCATAATCGTAAGCAAGGTGTA
AAGTTGATCACATTCTCTTCATGCTAAGGAAAGGCGATCCTTGCTATCCACATAAAAAAT
CTCACCTTCCTTGGAAAGACATCCTGTTCAAAAATTCTTTATTTGTCACTGCTTACTAAT
TGTGCTAAGAAAGAAGTCAATGCGAATTTGTGAGAGAATTTCGTTGAAATGCACGAGGGA
TTAAACAATTCACACCACTTGCTGGCTTGCTGCAAACGCAAGAATTGTAACATTTCGAAC
TGGATATAATGCATTTGCATTAACGGGAATCGTCGCACTGGATATGAGCAGAGAGCTCGT
GGCTTTGAATTATTGAGAGAGATGAAGAGAGGATTTCTTGGCGAGCTAAGCTAAGGAGAG
CGCGCATGATCCAACCAAACATTCCAGCCAAGCAGCTCAAGTCTTTTCTTTTCTTTTCTG
ATTCCAAACAAGAGAAGAGAATGCCTTTTACTTTAGCATCCACTTGAGTTGTCGCGCTCC
ATGCTCTATCTCATACTACTACTCTTCCATCCAACTCTACCTAGCTAGCTTAGCTAGCTC
TTATCTTGCTACTGTCTCAACTGCTGCACAAATAATTCTTCAGTAACCAACCATTTTTTT
TTATCGCTGCCATTTTGCCGCCATCCTTTCTTCAGGATCGCAGCATTTTGCTGTCATTAT
TTCTTCGGGATTGAAGTTCCATCTACATGAAAGATGAGTTGCAAATAGTGTGATGATCAA
TTATCAGTTGCACAGCTCATCTGGTTGGATTTTTTTGTTGATTGTTCAGAGTTTCAGCAT
TTGAGACATGGTCCATGATCTGCCGACATCACGTGAAACGAGTGATTTTTTTTTACCACC
TGCAACTGAGGTAACATTTGGGAGATGTAAAGGGCCAGATAGATTTTGACCGACCAATCT
CGTCTTAACATATAGTACTACATTTTTTTTACTGCGATTAGATCTGAAATTATTTTACTG
CACCTGGTAACCACGCACAGTAAAAGCTTCATTTTGACTCAGAACAGTCTGCCATCCCAA
ATCTACAGCCGTTGACAGTTAACTGAACTTTCACTAGTTCAATCACTCAACTTATAAAAC
TGCCGTCAGATATTTTTTTCCAGTCTCACACTTAATTAACTGAGTAACTAATCTGTCCTA
ACCCATGGATGTACACTGGATCAAGCAGAGGGGAATTAATGGTCTAAACAAAGGATGAGG
CTATGAGCACCCACCAACCATACAAATCCTATCCCTGCACAACCCCCTCTCATTTTCCCC
>Os10g0530500|OsGSTU13	Os10g0530500; upstream from -3000 to -1; size: 3000; feature type:gene; location: Oryza_sativa.IRGSP-1.0.46:10:20623390:20626389:R
GACTGCGAAAATCATCGATTTTCGCAGTCGGGGCAACGGCCCGCCTGCAAAAATGCAAAA
AAACGAACAAAAAAAAAATCGCCGCATGCCGCCGCCACGCCGCCGCCCCCCTCCCCGGCC
AGATCAGAGAGGGGAGGGGAGGGGAGCCGTCGTCGTCGTCGCCGCCGCTCCACGCCGCCG
TCCCCGCCACCGGCCTCCCCCCTCCCTCCTCCGGCCAGATCTGGGAGGGAGGGGGCGAGG
GGAGCCGCCGGCGGCCGCCCCGCGCGCGTCGTCGCCGCCGTCGCCCCCGTCGGCCTCCCC
TCTCCCTCCTCCGACCAGATCTGGGAGGGAGGGGGCATGGGGAGCCGCCGCCGGCCGCAC
CGCGCCGCCCCGCGCCGTCGTCACCACCGTCGCCCCCGTCGGCCTTCCCCCTCCATCCTC
TGGCCAGATCTAGGAGGAAGGGGGCGACGTGAGCCACCGCCGGCCACCCCGCGCCGTCGT
CGCCGCCGTCGCTCCCGCCGGCCTCCCCCTCCCTCCTCTGGCCAGATCTAGGAGGGAGGG
GGCGAGGGGAGCCGCCGCCGCTGGTCGCGCCGCCGCATGCAGTCGCCGTCCCCGCCGCGC
CGCCGTTCCCGCCGCACCGCTGGAGAGGAGAGGAGAGTCAGTGAGGGAGAGGGATCTGAG
GGAGAGAGAGGTGAGGGAGAGGATAAGTGAGGGAGAGAATGGGACTTAGAAAAAATTTGC
TCCAAAATGGGTCTATTTATATTGCTCCTCATTTTCGCAGGCGGAGCATATAAGGTGCGC
CTGCGAAAATGATTTTCGCAGGTGACGCTTAAGTGGTCCGCCTGCGAAAATAGATTTACG
CAGGCGGACAGTGAACATCACCCCAATTTATATTTTTATAGGCAGTCATTTGGCTCCAAA
AGTCATGTCCGTCTGCGAAAATAATACCTCAACGTTGGGGAAAATGTTTTTTCTTCTAGT
GACTTATATATATTCTGGTTAATGTGACAACCAACTACCATCCACTTCTCCCTCTCCTCT
CTAATTTCGAGTGTTGCGCGCGTATTAGTCACCAATAAAACATACTCTCATTTTTTTTCA
AGGCCCAGATTATTTGGTGATGCCAATAAGTTTGTGTGGTGTGATAGGATTCATTTGTCA
CATCGGGGAGATAGTGTTATTCGCAAATATTTGGCCATGCGATATGTGGTGCTCTGGCAG
CGTGTACTTGGGGGCCATTATTTTTGAAGTTGATTGGAAAAAGAAACAGAAAGCATGTGG
ATGAGCAATGGTTGGGCTTTTAGCAATGGGGAATCAGATTGGTTAAGGATTTCTATTGGG
CCTTCAAATTAGAATGGGAGAAACTTGTGTACTTTGTATACTTGGTTTCTCACTTTTAAT
TTATAGGGAATACTTCTATGGATTACTACCACTATTATCACCGATGGAAACAATCTAAAC
TACTGGTTTATGAGTTCTACTACAAATAGAAAAAAAAATATCCTACCAATAATCAATAGT
TCTATGGTCCACTAATTTGTAAGAAAAGATGAAAGGTCTAATTGATTCTGCTACTTAGTA
CGGACCATCATAAAAATTGTCTTTTTAAGAGAGACGTCACAAAACTTTTGTTAAATTTAC
GAATCGTTATAATTCTTTATTTTTTGCAACCTAAAAATGTAGTTCACCTAACCAATGAAC
AAAATGCAACGAAATAATTCGGATAAGCCTCAAGTCAGCTGGTAATTAAAGATATCATAT
ATAACATTTTACAAAACAATTATAGTACAAGAAATTATGGCACGACTAAATCAAGTCAAA
CGTTGTATAGGCTTAAGCTCCAATCAAACGTCACTTATGTACATGCCGCCAGATTTCTGA
CAATTTAGGCTGTGTTTAGATTTAGGGGTGAAAATTTTTGTCATGTCACATCGGATATAA
GGACACACATTTGAAGTATTAAACGTAGTCTAATAACAAAACAAATTACAGATTCCGCTT
GTAAACTGCGAGACGAATTTATTAAACCTAATTAATCTGTCATCAACAAATATTTACTGT
AGCACAACATTATCAAATCATATAGCAATTAGGCTTAAAAGATTCGTCTCATAATTTACA
CATAATCTGATTAATTAGTTTTTTTATATATTTAATACTTCATATATGTGTCTAAACATT
CGATACGACAGGGTGAAAAAACTTGTCAAGGATCTAAACAAGCCCTAGGATGGTAGCTTT
TGGTCTCATACTCTCATGTTCTTCGTCCCTCTGTCACAGCAGCTGCCTTTTACGACGTGA
GAAGTGTCAATTCTAAACGGCGGGTCTTAATTTGTTGCATTGCATCAACGCCATTTCAGA
AATTTAAAGCGTTAGGTGGCCAGTAACTGTAGTGAATTTTCTGAAAGCCATCCACTTCGA
GTCAGATTTGCGAAAGTGCAAGTCTTAAATCAAACCGATCCGTTTTCCATTTCTAGTACA
AATCAAATGGAAAAAAAAAATCTCTTTTCGGATCACTACACCAACTCGTACTAAATTTTG
GGATTTCCACTACACCCAAGAGATTTTTTTTTTGCAGAGTCGGGGGGAAAAAAATACAGA
GGGTCTGCACAATTTCATTACTTACTTACTACTCCATCCATTTCCAAATATTTGATGTTG
GTTAATTAGTTTAATTTTGGGCAACCAACATTAGTAACAAGAAAATCCAGTTCTTGCAGT
TGCACTTAAAATGCTCATTAGCTTACAATTAATCTATCAATTTTTAGTATATTAATATTG
CACTGACCAAATTAACCCCAGTCTACGCTTGCTGGAGTTCCTTCATGCTCCTCCCAGTAG
TCTTGAGCTTGTGGCGACATAAAAAGGCCCAAAACGGGTGGCCTATCCTGCACTGCATCA
CAAAACCTCATCTAGAGCATCGAGCTGAGAGGTAAGGAAGAGAAGAAAACAATGGCGGGG
AAAGACGACGACGTGAAGGTGCTCGGCGTGGTGGTGAGCCCGTTCGCGATCCGCGTGCGC
>Os12g0428000|OsStr7	Os12g0428000; upstream from -3000 to -1; size: 3000; feature type:gene; location: Oryza_sativa.IRGSP-1.0.46:12:13654101:13657100:D
AATTATACGTGTTACAAACGCTCTTAAATCGTCACGTGACTCTCTAATAAATTAGAAAAA
ACCCTACAAGTTCTAAGAAAAAAAGAAAAATATCTTTAGCATTGATTTTCATCTAAAACG
TTAGAGAAATTAATTTTAACCATTAGATCTATATAAAATAGATCGATCACTTACGGATAT
GAGATCGGTTATATCTTCGGTCGTACACTTACGGAAGAAGAAAACATTACATAGTAGTCT
AAAAAATTGAGATTCATTTTTCTTTCTGAAACTGAAAAAAATACTAAAAGTCTATTATAC
TTCCAATAAACATTCTTAAGCCACCGCGTGGACATCCTACAAATGCTCCTAAATCGTCAC
GTGACGCTATAACAAATTAGATAATATCCTATAAATTCTAAAAGAAGAAAAATATTTCTT
ACCATCGGTTTTCATTCAAATCAGCAGAACTATTGATTTTAATTATTAGATCTATATAAA
TGAATGGTGTGGGCCATGTACATCGATCTAACGCAAAGGAAAATAGATTTGTTATAGCTT
CATCCGTACATATAGAGTACAAAAGACATTGGATAGTAGTCTAAAAAATCGAGATTCATT
TTTCTTTCTTGAACTTAAAAAAATTAAGACTCTGATCGGTCACAGTTTTGCCCCCATCGA
CATTACTCGGGACACTATCAGTGTGACGGGGAAAATTAGCTTGGGACTACATGTGTGTAT
CACATATGGCCGAGCTAAAAGCTTTATCTACCAATTATTTTAGAAACTTAAAAGTTAAAA
ACTATTTAGTATTTAAACTATCATGGTTGTATAAATGGCTAATTCTTTCAAACAACAAAG
ATAAAATAGGGTAAGCATTGGAGGCTTCATATTTAGGATTATGCAATATAAATATAATCA
CTAAAGGCCTAATGCATGTTAGCTAAAATAAAATCACAAAGTGACCATTTGCATTATGTA
TATTCCTAATGTTTAATCATAAATTTTAGAGTAAAAATATTTAAATCATGACAACAATCA
TACCACACTACATAATAATCACACATGTGGAGTTATTTTTCGCAACGAAATTATGTTCAT
GCTAAGTTACATGGAGTCTCACACACTCTACACGAAATAATAAACTATCTCCCACACTGC
GGAATCAATTTAGACTCGAGAAGGCTTTTTAGTTGAAATATATATTGTGTCACATGCACC
CAAGGCATCCATTAATAAACAATGAGACAATCAAGTATACAGAGAAAAAAAGCAGGTGCA
TCTCAACAAAGGATACAGTAAGTTGTAAAATATGTAGCCAATTTGCTACATACCAAAAGG
AACACCAAAAGTAACTATCAAGTTCTATTGATTGTTGGCAAACAATGATATGGGCACAAA
GATTTGTATATACCATTATTTTCATAACCAATCAATGTGAAATGACAACATTAAGCCACT
TTTCCAACTTTTTTAATTGAATGTACAATTGTGTTCATCACACTTCTAATCAGATGATTT
CCGCGAGAATACTTTTCACATGTTCCTCAAATGTGTAGCCCCCTATGTGATGAGCCTTTT
GCCTCGGACTCACCGGCTACCTTTAGAAATGACTTTTGTAATGTTTTTACACATAACTAT
TTTAGTGGAGTACTTAACCCACAAGGTAGCGTTGAAGCTTTTACACAGTGAACTATATTA
GTGGAGCACTTAACCCACAAAGGTAGTATTGAATCAATCTACTCCCTTGGCTACAGGGAA
AAAAGAAAGCTCATTTTACATCCTAATGATATTTTATTCTTTTAAACTTTTTACATAAAA
GTAATATTTCGCTTTGACACATCAAGAGACGAAGGTCAATAATAATTAAACGAATACACA
AAATTCGACGGCTTGCATGTAAATGCCTCTAAGGTGTCAATACAAAATCAATAGCATTTC
TTATAACAATATGATTAGAAATTTCCTACTAATTTTTATTTTAAGACTCATATTGACTAG
GTATTTTTTTCTTAAAAATACTGTAGGATCCTACGTATGAGAATCACTATCTAAGATATG
TATATTTGATCAATTTAAGAAGGAGATAGCAAGATGGTAAAAATTATATATTTATGAGAA
ATTAAAGTTTCTCAAGATTTTTAAAGAAAAAATACAATGAATATTCCCTCACTTTAATTT
AAACTTATTTTTGTTAGACCTGTTTTCGCAACGAAATAAAAACATGCCCGCGCAAATGCG
CGGGCTACCTTCCTAGTTCATAGAACAATTATCCTTCATAATACTTCCTCTGTTCCATAA
TATAAGGGATTTTCAGTTTTTGCTTGCACTGTTTGACCACTCATCTTATTCATAAAAATT
TTGGAATTTTTTTTGACTTACTTTATTATCCAAAGTACTTTAAGCACAACTTTTCGTTTT
TTATATTTGCACAATTTTTTTTTGAATAAGATGAGTGGTTAAACAATACAAATAAAAACT
CAAAATCTCTTATATTATGGGACGGAGGGACTACTAGTTGCAATATTTTTTATAGTTTTT
TATATTATCTGTTAGTAGATGTTTTTATATACCTGTCAGCGTATGTTTTTTATGTGTGAT
GGGATGTGTCGCCGCGTCATCGTGCCTATCTGATCTTTCTTCAGTGTTGCATGCATGCAT
CATCCTTTTTTCCTGCGACCAAGGGAAGGCTGATCTGAAACTGGCGTGGCACCAGCCGTG
TTTCATGTAAACATATCGCAGATAGCGCAGTACAACAAAATTAATCGAGCTAGGTAGGGC
ATAGGATCGGGTCGATCGAGGCGAAGACTTATCAGAAAATGATGGCCCGGCAGCATCGCA
TTCGTATGATGGCCTACCTAGCTGGATGGATTATGCCTGGATGCGGCTAATCGATCGGTG
GCAACAACTACTCCTCCTCCGATTAATTAGTCCCAAAAATCTTTGAGAAATTTAATCAAA
CCAATAATGCACTGAGCCACTCACCTGCCTATAAAAGACGAGCCTCGCCGCGGCCGTCGG
>Os06g0129400|OsSPX-MFS3	Os06g0129400; upstream from -3000 to -1; size: 3000; feature type:gene; location: Oryza_sativa.IRGSP-1.0.46:6:1551861:1554860:D
TAAATACAAGAGTGATTCCTTATCATGATGAAATTAAAAAAACAGAAGTCTAGAACTACT
CCAATATTCATTTCTGAATTCTTGCCCGTTAATTCCACGTGAAGTACTTGCCTTTTTTTT
TTCTTTCTGGCAGATGAGATCTAGCTACTGCTCATCGTCTCAATTACTAAATTCTCAATA
AGAATTTAGAAGCTAATGTCAACTAATCCTCCTGGTTTAATTTAGCGATCGCTCTCGATC
GTGCTATCACATGCAGAAGACCTATGCCTCGTACTAAGAATGATTAATTGTGAGATATAT
ATATATATATATATATATATATATATATATATATATATATATATATATATTCCTATATGG
AACGAAATAATATATGAACCCTACACTCTTCCAAACAGGCCTGATCATTTCCCTATATTC
AGGTGACGGCAACATGCTACCAAAAAGGTTTCTTTAATTATCATCTTCATATATAATCAT
CCGGCAGTTTATTGATTCCGTCCCCGAAACGGCATATTCGCAAACAAAAAATAATTTATA
AATAAAACTTTTGCATAAGTGTTTTTAGCGATTTAAAAGCAAAGACTGAAAAATAAAACT
TCGATGAAAAAACCTTACAATCAACTTCAAATTTAAAATTGAAAATTTAAATTTTAGCTT
ATAAATATAAGTATAATCGAAAAGATAATGTCGTTCCAGCACAAATCCACATGCAGCGTC
TCGTCGCCGTCGATCATATCTCATCTCATCTCATAGCATGATTGATCTACACTGTCCGAA
GATAGCGTCGTAGTGAGTATAGCCCACATCAGCAGAGCCTACCACGATTTGAACCATTGA
TTACATTGCCTTTTGTTTTCTTTTTCCCTTCTAGCCTCATCTCGTTTGCTCTATCGACCG
TTGATAAGTCATAGAAAACTTATATGGTAGAACTTTTATATATTTATATATTTGTTCTTC
GTCAATCTCAAATACGTCAGTTCAGTCTTTCGCCGATGCTTATAAAAATAAAATGTGATT
GCGTGCGTTTATACAAATGAGTGTGTGTTTTATGAACATCTACATCTGTGTTGTATTTTC
TAAAATATAATCTATCAAATTTAGTTAAAGAATAGTAACTTTTAAAATTTAAATTTTAGC
TACGACAAGTCACATGGAAAACAATGTGAGGTTGGTTGGCGAATTTTTTTTAAAAGCAAT
ATGATTTTAATGGAAAATCGCAAAACTATAGGTCAGTTAGGCGAAATCGCAAGTTTAGCA
CCCTGTCGAACAACCGCGGTTCGACAGGGATACCTATCGAACAACCACAGTTCGACAGGT
ACATGTCGAACTGCGTGAGTTCGACAGGGTAGGTGGTCCAAAAATAAATAAAAAATTACA
TGAACAGTATCACTACAATGCTAGGCAGGGACATATCGAACAGCCAAAGTTCGATAGGGT
TGCGTGAACAGTGCGCTACAGTGATGCTACAGTGCTCGCAGGCACATATCGAATTGCCTT
AGTTTAAAAAAAATTCGTTGGTTGGCGATCATAAGTCATGGTCTGGCCTGAAACTGAAAG
CTCCATTCATTCCGGCCATCTCAATCGGTTTGGATTCTATATTGATTCGATAGATAGACA
GACAGATCGTGATGATGCACTAATCCGGCCCAGTAGTGTGACTAGGAGTAAATATTTCAG
TTGATTAATACTCCATAATTAGGATAAGGATGGCCATGTGTTGCATTATTATTATCATGG
TATTTATTTTGATGTCGGCTTCAGCTTGCTGCCAAATCAAGTTTTTTTGTCCCGATCGGA
CGCGAGCTAATCTTCAGCCGGTTTGAAGGCGAGAAGAGCCAAACCAACTTGGCTTTTGTA
ATCTGGCTGTCGATCTTGTGGTCAGGGTTAATGACTCGCCTGACTGCCATTTTTGACGGG
TTTTAATAATTGCTTTTCTTTTCATCTTGCGTTTTGCCGCATGTTTATGGTGTGGTGTTC
AACTTTATTTTTTTTTCTTTTCTTTTTTTTTCGGGGAAAGGGAAATAAATTACTCAGGAA
TAATATCGTTTCTTACCAGACCTAAAATACAAGTGCAGCTATTACCGCACCAGAGATTTT
CTTTTCGGAATGGTGTTCAACAGTTCTGTTGCGTGTGTGGCCATCGTCGTATGCTTGTCA
ACTTATTATTAATTATTCACTGCTAAAAATTGAGTTTTGTAATTTAATTCTAAATTTTTT
TATCATGGTTTATTTTTCAATGTTGATTTTATAAACCGCAAACAAAAAATACATAGAAAT
TTCGACTTATAATAAAATATTCGTTTTACTTATCAATCATGGCTCAAACAATTAGTTTAA
GATGGAATGTTTGTCCACCAACCAGCAATGATGTGGACTTGTTGAGCCGCCGGCGCCAAC
ATTTGATCGGATTATTTATTTATTTTTTCCCCTCACGATGCAACATGATCCACTTGTTCA
CTGCATACTTAGAGTAAAAACAATAGCGGACTATTAGCCAGTTATAAACATATTTTAATA
AAATAAAATATGAGAGAAAAAAGCAGCGGGCTACAGATCTGTAGCCAATTGCAGTATGGA
CTTTAAGACACATTGTGCGTATGATAGATGGGACCACATATAAATAGCATAGTAAATAGC
TGTTGTATGAATTGACTATAGGTGAATTGGAGTCATTAATGGGCTATACTATTGAACTTG
CTCTTACGGGTGGGCCCCAACCTAGTACTGCTGGAGCAAGAGAACGTGCGGCCGCCGCAA
AATCCCCACCACCCACGCGCGCATCGGTCGGCTGCCAGCTAAGCCGAGAGCAAACATTTC
GTCAAAACCCCCTCAACCTTTCGTAATATTCACAACCGTACCCCTCGATCTACCCACCGC
CGCCGCTGCTGCAATGATCGGAACAAGCGAGCGCCACGTGGCGTGTGATGTGGACACTCC
GGAATATATTTTTTTTTAAAAAAATAAAAAATATATCACCGCGATTTAAGCGGAAAGCTG
>Os08g0141300|Os08g0141300	Os08g0141300; upstream from -3000 to -1; size: 3000; feature type:gene; location: Oryza_sativa.IRGSP-1.0.46:8:2302809:2305808:D
TTCTTTAAACTTTGAATTTTAGTCAAACTTCTAATTTTAACATGAAACTAAACACACCCT
AGGAGTCCTAAAACTTGTGAGCTATCACGAGCAGACTCCATTTCTACATTCCATTTGAGG
AGAAGCCATATCAATGTCTGTCTCACTACATTCCAGTAGAGAAGGCAGCCAAAGCAGCCA
CGCCCGTGTTTAAAACTGATGAAGATGAATATAGATGAATATTAAATTGACTTACGTAAA
AAAAACTATTAGCACATTATTAATTAAGTTGTAATTCTTACAAATTTAACAAACGAATAT
ATTTGATATTTTAAAGTAACTTTTATATATAAAGTTTTCACACGAAACACACTGTTTAGT
AATTTAAAAAACATGCTAACAGAAAAATCGAGATAAAATATGTATCTCAACGAGAAAAGA
GCTGAGGGCCTGAGGCATCTTCTTGGCTCCGGGAAGAAGAACACGGCTCGTGACTCGTGA
TTGACCGGATCAGTGTCACCATGCTTGTCGCTAGCAACCTTAGCATAGAGACGATCAGTG
ATGATATATGTATGCGAAAATGCAAAGACAAAAGAGAGAAAAAGAATAGTCCCTATCACA
TTGGATGTTTGGATACTAATTATAAATATTAAACATAGACTATTAATAAAACCATCCATA
ATCTTAAACTAATTCGCGAGACGAATCTATTGAGCCTAATTAATACATGATTAGCCTATG
TGATGCTACAGTAAACATTCTCTAATTATGAATTAATTAGGCTTAAAAAATTTGTCTCGT
AAATTAGCTTTCATTTATGTAATTAGTTTTGTAAGTAGTCTATATTTAATACTCTAAATT
AGTATCTAAATATAGGAACTAAAGTTAATTGCCCTCGATCCAAACACCACCTGAGCAGCA
GCTGACAAGAGCTCGCTCGAAATGTATGCGAAATTGTCCCTGTCGATCCGACGTGCCTCG
CAAGCTCTGCCATTGACTTCTCCAGCGCTCTTGTAGCACACCACCACTGTACCCTGCCCC
TTCTTCTGCAGCGTTTTGTTCCATCTTGATTATTGGATTCTACTGCCAGGCCCTACATAT
TTCCTCCTTAGAATCTTTTAAGATTTTTAAGATTTTTCTTCTTTGTAGAAAATTCCAGTG
TTTGATTGGTTGGTCCACGGTTGATAAGCTCTATAATAATGATGAAGTAACCAAAACAAA
ATTGGTAGTAAAAATATGTATTCTTATATTATCATTAGCGGTTTAAAACTCAATGAAAAA
CAAACTAAGACAAACAAAAACCTAAATTTTAAAATAAGTTATTAAATATAAATGTTAGCT
ACGGTTGATAAGCAACAAGCTGATAGGGAGAGTGATGTTCCTCGGAGCTCAGTGGTGTTC
ACCTGGTTAGATTATCTAATCCTAACTTGATTTATACCATGTTAGTTGGTAGTCAGTCAA
CAATTAGATTATGTATTGAACTTATGGTAAATTTTGTTCTGGTTCGAACTTATGGGTTTT
CTTTCTTCCATCCTACGAAACTCTGTACCTTACTACTCCGTGAATATTTTAGCAGTAGCC
GTGAATGTTCTTACCATTATAATTAAATATATTATTATTGTAATTAGTACGTGACATTTA
ATTTAAGAGGTGGTTAATTAATGGATAATGAGCTTGATGGATGTCCAAAGATTAGTAAAG
CACACTAGCACTCTGCTTAACCATTTCAACCAATATCCACTAAAAGTGACAGTACTTTGC
CTAAGGCACTAACTTAAAATATTTGAGAATATTTTACTTTTAATTGAGATATCCTTTTTA
AGTCAACAGAGTCAACTGCCTTGAAAAAGTCATTAGTAAAAGGCAAAAGCGCGTGTCCAA
GTCAATCCATACATATCCATCATCTTTAATTTTGTGCTTAGTGTTAGACCATAGTTTTAG
GCCATCGTTATAGCTCATATCAACCCTACCTAGGTAGCTAGTAATCCATTCTCCCATTAA
TTAATTTCTATGTGCAAAATTTATACCCAGAAGTAGTTATTGTTCCTAGAGTTTACTAAA
GATAATGACCTCATTCATCTAATGATGATTATAAACCTTATTACCAATGAAAAAAATAAT
AATTTGTAAGTAAATCATATATGCTTGTGTCCTTAACAATCCAAAATTCTGAAAATCAAT
TGTAAGAAATAAAGTTTGATGAAAAAATAAAATTAACTTTAAAATACAGTTTTAAAATGT
AAATTTTGATGATGGTTTATAAGTTGTAGCCTTATAGGACGAATGATGGGAGTATAAATC
ATCAGGACAATCAACCATAGCATCCAACTAACTAAAACAACGGGAGGTTCTACTACTAAA
CTAGCCACTAATAATGCAATCATGACAAACCAGCAAAGGAATAAACTTATTACTACCAGA
TTCATCAAACCAAACCTTGGACGAGTTTACCTTCATCCCATGATAAGCGGTAACCATGAG
ATTTGTTGTGGTTTCAAAACTAAAAAATTACCACACGTAATATATAACTGTAATAACCAC
ACAATAATCACACGGTTTCGCAAATGAGTAAGTAGTCCCTTCATCTCAGTATATAAATAA
TTTGAATTAGATGAGATATATCCTAGTATTATAAATGGACAAAGTTAGTACTATAATTTA
TCACATACAACTAAAGTCATTTATATTTTGGCACGAAGAGTACCTGTATTAGGGTTTTTT
CGGGAAGCTTAAAATTCTGAGAAGTTAGCTAGTGAGAAAGAAGCTGAAAAACTCAGCTTA
TGACTTCTAGTTTATTTTTCAGATTCTACAGTTATATATTCTCATCCTCTAAATAAAAAG
ACTATAGGAGCTTCCGTCAAGTAGCGAGCTTCCGTCAAGTAGCGATTAAACAGGCCCTAT
GAAGATTAGCGAGGGAAGGAGTGTGGTGGGCCCCACCAAGCAGGAGAGGGGGGTGTGGGG
CCCACCATGCAGGGCCACTCACTCCACCACCACAATAAGAGAAGACGAATTGACAATTCC
>Os08g0508800|Lox2:Os:1	Os08g0508800; upstream from -3000 to -1; size: 3000; feature type:gene; location: Oryza_sativa.IRGSP-1.0.46:8:25224079:25227078:R
TATTTTTCAAGTTGAAAGGAAACACTAGATGGAGTACAAACCAGCTACCACTAGTTGTGT
AGTCACGTCCAATGAACAAAAGGCATGCATTAAAGTTACTTTCTTTTTGTTATAAGTTAC
TTCTATAATATATGTAAATTACTTTTTAAGCTTTATTTAATTTACTTTTATATGTTGAAG
AAGTAATTTAGTGAAATCTAAAAGTAATTTAGATATATTATAAAAGTACTTTATAATTTT
TCATCAAAATATAATCATGTGAAATCTTGTTATAAAGATTTAATTGCTACGAACACAACG
TTGTAATTGGATCGTAGATTGGATGAGTAGTTTAAGAGAAAATTTTATTTGAAGTATAGG
TGGATAGGGTCTCTCATGGATGGAGTGGTAGCTGATTTAGACAAACCAGCTACCACTAGC
TGTGCGGTCACATCCTTTCACGTTGTACACATATTTTATATATAGATAAAGAAAACACAT
ATACATTAGATTACTCTCTCCGTTTCATACTATAACACTTTCTAGCATTGCCCACATTCA
TATAGATGTTAATAAATCTATACACATATATGTCTAGATTTATTAACATCTATAATATTA
GTAATGATAAAAACTTATAATATGAAACGGAGGAGGAAGTAATTTTTTTTAATTAGTAGT
GATCGTATGTTGTCATTAATGTAGGGACGACTGTTTTGACTGCCTATCTATCATTCGATA
AAAGGGTCTCTCCCAAGTCCCAAACGACAGCCGGCATTCATGCATGAATCTCAAATCCCA
ATGTGCATCCAACAGTAAAAAAAAATTGACAGATACTCTCATCCGTATAGTAAAAGAAAG
TCGTTTATGATAATGTTTGAGTCAAATCTTGAGAATATAAATCATAAATAACTCTCAAGT
TGTTGAGTTTAAAAATATAAAAATTATATGAATAGATTCGTCTTAAAAAATACTTTCATA
AAAATATACAATATCACTTTTTAATAAATACTTTTATAGAAATAAGAAGTCAAACTTGTG
TTTTAAAGACCGTGTCGCTGTCCAAAACGACTTTCTATATGAGTATAGAGGGAGTAGATA
TTGCTACCGAAAATCTGTCAAATATTGGCAGATAGTAACCAACTCGCATCGCACGCCAAT
ACGCGTTATAATGTGTAAGTGTAACACGTACTTACTGATCCCCGTGGTTAATTAATTTGA
CCGCTGAATCGGCGTTATCCTAACGACCTACTCTCTCCGTCTCTAACTATTTAACGCCGT
TGATTTTTTTAAACATATTTAACCGTTTATCTTATTTAAAAAGTTTAAGTAATGATTATT
TTTTTCTATTATTTGATTTATTGTTAAATATACTACTACTCAAGTTTTTAAAAATATTCA
TAAAACTTTTTAAATAAACAAACGGTCAGATATATTTAAAAAAGTTAACGGTATTAAATA
TTTAAAGACGGATGCGGATGGAGTAATATTTTAGTTTCTACCGCGAGAGCGACGGCCACG
CCATGTCGTACGTATGTACATCTATTGGTCCGATCGATCGCAACGTTGCCGCACCCAACG
AAAGTTCGGATGAACCAACCCTCTAGCTACCACATCGATCCGCGTCGTATGGATATACGT
GTGCACAAAACGCGAGCGCGACGTACGCGGCGGCCAATTCAACAAGTAGCTATCTGTAGC
TACTTGGTCTCACCGGTCGATTTTTCTCTGCACCGATCGAGTAATAAACGTGCAGTCGAT
ATATTGTTGGATTCCTGTACAAGTTGGGCGGCTGGATATTATGCCCTGTTGCAAGGTGAG
GACATACTTTCTCCGTCTAAAAAAACAAACCCTGGGTTTTTGTGTCTAACGTTTGACTAT
CCATCTTATATAAATTTTTTTATAATCAGTATTTTCATAGTTGTTAAATGATAAAACATG
ATTAATACTTTATGCGCGACTTATCTTTTTAATTTTTTTCAAATAAGACGGACGGTCAAA
CGTTGGACACGGAAACCTATAAGTTTGTCTTTTTTTAGACGGAGGGAGTATATGGGTACG
GTGGTATATTCTTCCGGATCTATATGACATAACTATTTAGTACTTACGAATGGACAAACC
AAATATCAAAAAGTTGATGATTAAATGGATTTTAAATGTACGTATATATTCTATAAATTT
ATATGCACTTTTTTTCTAACAGTTTAATTAGCTTGTAGTAGCATTTTTTTTAAAAAAAAA
TTATAGTTAGCTGATTAAAGTACTGGCTATATATGACCAATATACTCTCCTTATCATAAT
ATAAGAGATTTTGGTTAAATGTGACACATCTAGTATAATGAATCATGACCAAATTCATTG
ATTAGATTGTGTCATATTACTCAAAATGATTTTTTATATTATGGGATAGAGTAGTATCAT
TGTATATTCGTATGCAATAACGACACGAGGATGACTGGCTGACTGGTACTTTGCATCGGA
TCATATATTACAACTCGCCGAGAAGGCCGAACGGTTTCGTACTACCTTTTCGTTTATCTC
CATCGATTTTGGTAGCTATACTAGCTAGTTGCTGCTGTCAACTACAGTGCTACTACTTGC
TGGTGGACCAGAGCATCCAGAATAGTACGAATTCACACATGGTTTGGAAGCAAGCGCAGC
TGTCTGAATTTTTTTTTCTTTTTCTTCCCTGCTCTCTCTATAATCTATATCCATATTTCT
CCTACTACGTGCCAACAACTAGTCGTCGAAGCGTGTGCTTGCAGACTTGCAGAGTTGCAG
TACATGGCAGAACTCAGTTCAAAGAAATGGCACGATGGCATGCATGCATGAATGAATAAA
TCTACGACGACGCGACCATCGCCGATCGAGAGAGGAAAGGAGGACGAATTGCCCAATCGA
ACAGAAGAAAATTAAAACCACGAATAATATTCTCGATTAGTTACTCTTCTTTTTCTTCTT
CTAATATTTCCTTCTACTATTATAAATAGCTTGGCCATGGCCCCAACCATAGACGACCTT
>Os09g0438100|Os09g0438100	Os09g0438100; upstream from -3000 to -1; size: 3000; feature type:gene; location: Oryza_sativa.IRGSP-1.0.46:9:16201903:16204902:R
GCATACGTACCCCACTTTTGTGTCTCCCGAACGGCGCTCACAAAGTATGGATTATCGGCG
TTTCTACCAGGAATGCCGGCGGTAAAGAAGAACCTTGCCCATGACTCACCAATGGCTTGC
CTAGCTTGCTTCCCTTTCTTTGTGAAGAATCCTGTGTCAATGCGTGGCTGCACAGGGGCC
TTGGCAGATGCTAGGTTGTAATCTCTCACAGCAGGTGACTCCCTATGAGACGTAGCCCTT
CGTAGCATATTGGTAATTGGGTTACTTCTACCTTTCCGTGCCTCCGGCTGAGCGGATCCA
CTCCCACCGCCATGCTCATAAGTGCCACCACGCTCCTCAACATCCCTCCTAAAGTTTTCG
TCTTGTCGTGAGGCTGCAATGGCTGCTTCCATTTGTTCCTCCTCGTCGGCATCACCTGTT
AGGTCATAATAGTTGACCCTTGCTGCTTCAACCCTTCTTCCGCTATCACTCTTACGCTGG
TCACCTGCATCTTTTATCCTGTCCAACTCACGGCAGAAGAACTCACGGACATCCGGAGGC
ACTGAATTGCAATATGTAACCCCCTTCCCTCTTGCAGCCAAGTGTTGCTTTAGTCTTGTT
GCCCCACCACCGCCCCTCTTTGTATGGCAATACTTACAGCGCCATCCAGGTGGGATATTC
TCCCCGTGCTCCCACACAGGGTCCCTACTATCTGACATCTCCACCCTGTATCAAATGCAT
GAGAAATTATCACTGCTAATTATAAACATACCTCCCATTATGCAATAATACGACGTAATT
ATATGTACACTGGTAAGCATGCATCCAAATTCTTCCATACTATGACGTATTTAATTTAAC
CTATATGTACATAGACCAAAGCAATCAAATATACTTCACATGCATGGTTTTAGCCAAGCA
CGGGCAACCAAATGCCGAAATAAACTCATATTCCCAATGTATTTCACATGCATATTGGTA
AAAATATGTTCTATTGACCTAAATCCCTAAATATGTCCATGCATATCACAGTAAAAAATA
CCATACCACGGTTCAAGCCACGGTAACCACGGTAGGGTGGACGGTTACCACGGTTTTCAC
ACGATTACCGCGCATACGTATATCGTCTCATAGATTACGAAGCCGACGATAACCGTACAA
AACCGCACGGTTACCGCTCCTAACCGCGCGAAAACCTTCAAAACGGAGGGATTACCTCTT
GCCCGTCGACCCAGGCGGTTACCGTCGCGTACCGCGCGGTTACCGCCGCTTACCGCGCGG
GAACCGGCCTCGCCGGCGCAGAGGCGGCGGATCTGGCGCGGAGGCGGCGGATCTGGCGCG
GGCGCACGCCGTCGCCCCTTCGGTCCTGAGCGCAGCTACGCGAGAGAGGGGAAAAACGGT
GGGATTCGCCAGAGAAACGAAGCAGAGGCTTCCAAAGATATTTTCCTCCCATTGTGGGCC
TTATTGGGCCTCGTGAAGAGTGCATACTTGGCCCATTCCATTTAATCTTTTTTCTTTTTT
ATAATTCACAATAGGTTTTGCGCTCAAATTTGAATTTACCTGCATCTTTTTGATGAAATT
TTTTCACCATAACAACATACAAAACAAGCTTTACATCCATGATTTTTTTTTATTTTTTTC
GATTATTTTTCAAATTTTTGAATTTGAGCAAAATTTGCCCAAACCCTACCGCCGGTTTTC
GTTACCGACCCTCCACGGTAAGCCCGGTAACCGCGGTTACCGCGCGGTTACCGGCGAGAA
AGTGAACCCTGGGAACATGTCGAAGGGTGCACCTTCTAACCCACATTTAAAAAGATGTAT
ACCAAAGGCAGCTCACTAGCCTGACTAAAACGGCAAGAATCTGACACTACGAACATCAAA
CTTTTTACAGCATATAGTATTTTTCAGCTTTTCAGGTCCTCACTATACAAACGATGAAGT
CGACATGTTCTAATCTGTCAATGCTATCATGATTTGATTAATTCCATGACTGTTGCATGG
CATCTAATCAATTAGGGGAGTTAATGAGGTCTGCTTTAAGATTTATGGTCCTGTAGAGAG
GGAGATGAGGTCTTTGCAATATAATTTCGTTCCAAACAACGTAACCAAACTCCTGGCTAA
AACAACTCTATTTGCACAGTAACCCCACTGCCACACATCACAGATTTACATATCTCGACG
GATGGATACATATGCCTCGGCGATCTTAGCCCACAGAAACCGGGAAGTATAGATCTCAGA
GCCCCGGGAAAATCTGGGCCATCCACGTGTCCTCCCGTCGACCACGAGCCGAAAACGACG
CTCTCACGCTGGTGTCATGTAGCTTTTTTTTTTCCCATTTGGAGAAACGGTATCTCAAAA
AGCATCTCCCGACGTCGATTCCCAGCATCTCCTTGTTTGATCCCCAATGATGCCACTCCT
GTAGGATCTCTGCCTGCCCTGTTACGGTTGACAGCTAATTACCTTGATTCGTTTGTGTGT
TTTACAAGTACAAACCTGAAACCTCATGTTTTGTGTAGCTAATTAAGTAAGGGATAGCTT
TAATAGCTCGATTTTGAGCTATATGATGCTTTGCTATATGTTCAAGAAAACCAGTGGCAA
ACACTTCATTAATGCCATGCTAAAAGACACTAAACATAAGCTATTACTAGTTTACTATTA
TTACCTCATTCCAAAATATAACAAGTTTTAATTATATATCTGAATAAGTGTAGTTGTTTG
ATAGCCATCTATAACACGGTCTTTACCTACTTTTTTTGGTTTTATCACTAACATGTCTAC
AAAACACTTAAATGGCCGTTGCTTAAAACAGAGTCATCATCCTGTGTTCAATAATCAACT
TTATAGGTCTAATTTTGAACTAAAAACTTGTTTATAATCCCAAGTACCTGCTTACAAAAA
CTAATAAATCGCCGTGCAACTTTTTTAAAAAAATATAGTTAAAACAAAATGAATGGCTCA
ATGCGTGCACTTCCATTCGGAGACCTATATATAAACACACGCACACACTTATCAGTTCTC
>Os09g0532000|SGR	Os09g0532000; upstream from -3000 to -1; size: 3000; feature type:gene; location: Oryza_sativa.IRGSP-1.0.46:9:20871078:20874077:R
GCGCGCCCGTGGCCGTGGGAGCTGAACCTGATCGAGCACGTATACCGCACGCGAAACGTG
GATCGGATCGCGACATGCCCCCGGCCGGCGGCCGCGGGCAGCGTGCGGGCCAGGCAGGCG
ATCGCGAGAGAGGGCAAACCGTGCCTTCTAAGCATCACGGAAATGAAGCCCACACGCCGG
TGCATCCACGTCGCCTAGCTAAATTTGGCCCGGTGTCCTCTCCAGTTTCCTGACGACGAC
TGCATCCTGGAACTGGAAGTAGTAGTAGTAAATAAAATACTCAAAATTCACCGGAATTCA
CCTCCGGATTACTACTAAAATGCATCTCAACCCAAGAAATCATCTCTATGTATTAAAAAG
GAAAAAAAATACGAATTACCCTTTTAAACTATAGCGGTCGATCGAATTATCCCCCTAAAC
TCGAAAACCAGACATCGTTCCCCCTAAACTATGTATACCGGACGAATAACCCCCCCTGAG
CACTGTTTTGGATGGTTTTTGACTTGTGTCTGCATACGTGGCCGCCAACGTGACATCCAG
TCAGCAAAATAAAAATAAAAAAAATCTTAGGACCCATATGTCATCTCTTTCCTCCACCAA
TCCCTCTCAAATCCCATCCCCCTGGCCCCTGCCTCCCTGCTTGCTCTCTCTCTCTGCGTC
TATGGCTGGAGGAGGAGACGGTGGCCGACGGCGGAGACGGATCGACGCGCAGACATCGGT
GCACAAACCATCACCGAAGGTGGCTGCCGTGCTTGTCCACCACCCCCATCGGCGACGTTG
GCGAGCCTCCGCGGGAGCATGAGGCAGAGATGGGGGACAAGCACGATGTCCGGTGGAAGC
AAAGGTGGGGCGCGTCGTACGGTCACCCGAGCTCGATGGTAATGGGGGACTCGCGCCTTG
CCAGCCGGCCACCACCACAGCAAGGGTAGAGAGGAGAGAGATGGCGCGTCGCCGTGCGCC
GGCCGGCTGCCGCCGCTCGCTGCAGCAGGTGAGGGAGGAGGAGGAAGAGAGGGGATGGGG
ATTGAGAGAGTAGAGAGAGATTGAGACGTTAGAGGTGAAAGAGAGAGCGGAGAGTCTTAC
AGGTGGGGCCCACACTGTTTTTTAAAAAAAAAATGCTGATCGGACTGCCACGTAGTACTG
AAACCACCCCGGATTGAGCCGGGGGTTATTTACCCGGTTTGTATAGTTAAGGGTGTAAAA
TATCTGATATTCGAGTTTAGGGGGTAATTCGATCGTCCATAATAGTTTAGGGGTAATTCG
TAACCGTGGATTATTTACCGGACGGAATTCACCTCTAGATTATTTACGGCCGGGCTGCAA
ATTCTCGCTCGGAGTTGCATGAACGTCTCCGCCTCTGACGAATCTGCACTTTCTGCAGCC
TTCCGCCGGCAGCTAGCCCGCCTGGCGTATCGGAGCAGAATTTTTACAGATTTTTTGAGA
CATTGTGGCGTTTTGAAACAGTTATAACTGCAGTATATGTGATTCACGTTGGGCCTCAAG
ATTTTCAATTTTCCTTTTTAATAAGATTGGGTCCCCAGATTGAAGGTATATATGATCATT
TCATATGGGGGTTCTTAAGCTGACCCATCGATATACGATTTTGTCTAGCTTATGTAGATT
CTTAAAAGCTCGTTACCAGCTAGCTGTTTCTCATAGCGTTAACCTTCACAAACATGGCAT
ACATATCGAAAACAGAAGCAAAGAAACGGATCGATGAAGCTTTGGCGCTCTCGTTCATCC
TGTTTGGTCACGTGGGCTGTGGGAACGGGTGAGGCTAGAACATGATAACCACGAGCCAAG
TCTCCCATTTTCGTCTTCCAACTATATGTCGCATGGCCGTATTTGCCAAACGTGACGAAT
GCTCCTTCTTCAGTTAGACCGAGAAAAATTAAGCTAGATTCCATAACTAGCATCGATCGC
TTATGTGAGTGTGTCAGCTGCCTTGCACGAGCTGATCAGCTCGCACGCATCGCGGAGGAT
TCAGTCAAAAATATGATCACTCGCGCATATATACATGCATTTCAGAAAGCACGGATGCGC
CTAGCTCGCAAGCAACAGCGCCGTGCAGTAGCCTTACACCATGTAATTACACTTGGAATC
TAGTTCTACCATGTAATTACACTTGGAATCTAGTTCTATAAAAAAAAGAAGTTGGAATCG
TGTTTGGAACGATCACTCTGAAGTTTGATCCACTCAGATCCCCCGGAAAAAAAAATATCT
CCATCATTTGCTTTGTCAACGAGTTACTTGAAATGTTGAGTACACTGCGCGGTGCAACGT
ACGTAACGCAAAATTACAATCCCAATTAAGCAGACGCAGTCCCCATATATTGCATGGTCA
AAACCAAATGAAGTCCAAGTCTCCACTAGATTAATTCGGGCCAATATTAAGTATCCTGCT
GTATGTCTTTCGGTAGAAACTCTGCAAATTACGATCAATATTTAGCCCGTTTCAAGAGGA
AAATAGTTACAGATAAGTAGGTGTGTGGTACGTATACGTATATATGTGTTTAGTTCACAT
CGAAATTGGAAGTTTGGTTAAAATTGAAACGACGTGACAAAAAAAGTTAAAAGTTTATAT
ACGTAGGAAAGTTTTGATATGATGAAAAAGTTGAAAGTTTGAAGAAAAAATATTTGGAAC
TAACAAGGCCGTAACCGAATGTCAAATTTGCATCAAACCACGCTCCTGTAGCAGAGACGC
CACGTGCAGCACGGCCAAGCGTTCCATTCCTCCCGTTTCCACCCACGCGCGAACGCCACA
ATTTCCCCCGTTTTCCTGGGCGTTTTTCCACCACCACCACCACCGCCGCGAGACGACACG
AGAGGAGGGCGCGGCGACGACGCGAGCTTCCCCGCGCGCGCACACAACCGCGACGTTTCC
CGACCCCTCACTCCACCCCCCACCGCACCACGCGTGCACACCAACACTAATACAACACTC
TTCTTCTCACTTAACCCGCTCTCTCTTATAATCACCAACCTGCAGCGAGCTGAACTGACT
>Os11g0145200|OsUGT75E1	Os11g0145200; upstream from -3000 to -1; size: 3000; feature type:gene; location: Oryza_sativa.IRGSP-1.0.46:11:2069429:2072428:R
CCGTTACAGAGCCGACGGAGCCGTATTCGGTCAGACCGAGCTGAGGCCGGTCTGACCGGC
CACTCAACGTCGGTCTGACCGGCCAAGCCAATGGGGCCCTCTGACAGGGCTACAACGGTT
GCAGAGTAGCACGGTCTGACCGGCCACATACCTCCGGTCAGACCGGCAGAGCACTGAGTT
GGGGGATTTCGCCCCCAACGGCTAGTTTTGGTTGGTGGGAGTATAAATACTCCCCTCCAG
CAGCAAGGGGGCTCTCTTGGCACCCAATTCAATTGCATAACACCCTTTGCACCTCTCTCA
CACACATTTGAGCTTAGTGTTCATCCATGGTAGTGGTTGAGGTTGTTCTAGCCAAGAGTC
AAGTGCATTTTCTTCCATTGTAGAGTTAGTGTGGCACTTGATCATCTCCGAGCCGGGTCA
TCGCTTGTTACTCTTGGAGGTTGCCACCTCCTAGACGGCTTGTGGAGGTGTTGCCCGGTG
ACCTCTCCGAGAAGATTGTGGAGGAGGCCCGGTGCCGGTTTGTGAGTGGCTTAGTTAGAC
TTGTCCCTCACCGAGCCTAGCAACTTAGGTTAGTTTTGATTAGGTATCATTTAATTTTAA
ATCGCCTATTCACCTCTCTCTAGTCGACATCTCGATACTACAACTGTCTGATCCAAAGAT
AGAGAATAAAGCTAACTAGCTAAGGTTGTTCCTGACAATCAAACTTGTTCCTGACATTAC
ACTATCTCACCTTTCCGTCACTAAGGTGACAAACTAAAGCTATATCGTCTCTCAAAATAT
CGTTCAGATGGTCTTCCAGCATCCTTTTGTAGCATTCATCCAAAAGATCGTTCTTGTTGA
GATCAATCGCAGGCTGTACAGTGAAATCAGATTAGAAACATAAGCATCTGTCTTAACAGA
GAAATCAGGCAGCCCACTAGTATGCTTTCCTAAGACTATATTCCTCAATTACCAAATCAA
ACACGTCTGCAAATTGAGGATTTCGCCGCGCCGAGCCGCTGGCAGCGCCGCCGGCCGCGC
CGCCAGTGATTTTTGCCGTGCCGCTGCCTGCCGGGAGGAAGCGAAAACCTGCATCGGGGA
GATGCGGTGCATGCGTCGGGGCGAGATACAATGCGTCGGACCTGATGCGAAGAAGCGAAG
AAAACATCCCATACCAAAATTATCCCTAAACTATATTAGGAGATTACTAATCTATCTTAT
AAAATTAACGGTCGAGATTAATTCTACTTGTAGTAGAATACTTCAAGTAGAGAGCACCGG
AGCGTAACTCAAGAAGAAAAGATAGGTCCTGTTTAGATCCCACCTCAAAATTTTTTACCC
TGTCACATCGAACGTTTGAACACCTACATAAAGTACTAAATATAGGCTAAAAAAATAACT
AATTGCACATATTGCGACTAATTTGCGAGACGAATCTTTTAAGACTAATTGCTCCATGAT
TTGACAATGTGGTGCTACAGTAAAGATTTGCTAATGACGGATTAATTAGTCTTAATAAAC
TCGTCTCGTGGTTTACTAACGGATTCTGTAATTAGTTTTTTATTAGTACCCGAATACCCC
ATGCGACACCCTATATAATACTTAATGTGACACACCAAAACTTTACGCCCCTGGATCTAG
ACACCCCTATACTGCTCTTATCTTCAACGAGCGGTCCCGCTTTCAATGCGGGTCGAACCC
TATGGTTACCCGGATGGTTGAATGCTGTTAACGAGAATAGTAATTCGCTTTTCTTAATAA
TAGGACCCGGAGATTTCTTGGTTCATCATGCTATTGCTTTAGGTTTGCATACAACTACAT
TGATTTTAGTAAAGGGTGCTTTAGATGCACGCGGTTCCAAATTAATGCCGGATAAAAAAG
ATTTTGGAAATGAGGGGCTGTTTAGTTCCCAAAAACTTTCCCAAAAACATCACATTGAAT
CTTTGACACATGTATGAAGCATTAAATATAGATAAAAAGAAAAACTAATTGCACAGTTTG
CATGTAAATCGCGAGACGAATCTTTTGAGCCTAATTAGTCCATGATTCGCCATAAATGCT
ACATTAATCCATATGTGCTAATGACAGATTAAGTAGACTCAAAAAATCCGTCTCGCGGTT
TCCAGACGAGTTATGAAATTAGTTTTTTCATTCGTGTCCGAAAACCCTTTCCGACATCCG
GTTAAACGTTCGATGTGACGTCCAAAATTTTTTATTTCACCAATTAAACGGGCCTGATTG
GATTGACACTTGTTCTGAATATTTTATGCTGCATTTGTGATTTGAGCAGTCGTTCAGATT
TTGCAACTGCAAGAAGATCCATATAGTACTGCACAAAACGCTAGGTAGCTGGTCCTTTTT
ACTCTTCTCTTTTCTTGATTAGCTTGTCTTTTACTCATGTATCCCAGCTAGCCCCATTAA
TGTGACAACAAAGACAGCACGAAACAAGAAACCTATCACAATGGCTTCGTCTCAAAATAT
AAATAGTGACAAGTTAAACAACTTTAACTTTAACTATTATTAATAGCAAAAGAATAAAAA
AACCAATTATATAAAATTCATGTTACTAGATTTATCCTTAAACAAAAAATCATAATATGT
AACTCTTTTTATTTAAACATATTTCTTTTATAGATATTTTTAGTAAAAGTAAAAAAACAG
TTATATTTTAGAACGGATGGAGTTTTTTTTTGGGTGATAGAACGTGAGTACATATACGTC
AGTGCTAACATCACATGCATTCCATTATTGCTCTCTGCAATAAGCTCAGAAAATCTACTT
TGCAAATCTAATCAGACAACTGACAAAATTAAATTTCAAGTGGACTAATGACAACAACAG
GTGATATTGAAAGATACTTGATAATTATCTACCTAGATACTTAAAAAAAACATATGCGCG
TGCTTCCTGAAATTAATTAACCATTGGCAACTAAAACCATATGCGCGTGCTTCCTAAAAC
CATTGGCAACTAGTCTATGGAGTGTGTATATATACAGAACTTATGGACATTAGACAATCC
>Os03g0700700|OsLOX1	Os03g0700700; upstream from -3000 to -1; size: 3000; feature type:gene; location: Oryza_sativa.IRGSP-1.0.46:3:28103903:28106902:D
TGTGCTTAAAGTATTTTGGATAATAAAGTAAGTAAAAAAATTAAATAATAATTTTAAATT
TTTTTAATAAAATGAGTGGTCAAACAGTGCAAGTAAAAACTCAAAATCCCTTATATTATA
TTATGGGACGGAGGGAGTAGCTCCTTTCGTACTCAATTTTCTTTCCAAATCACATGTCTT
GTTTAGGTGTGTCCGGTGTCCTAATCTCAACTTAAGCTGCGTATATGTATTCGTCTTAAA
GTACAAACAGACCATCCAATGAGGTACGGGCTATGGTTTGGATGAATAAACTGCAGTACG
TCAACGAAGTAAACAAAGGCCACAGGGCCACATGATCTCAAGTTTCTCAACAGGTGAGAT
TAAGTCCAAATTCAGATGAGCAGCAAAGGGATGGCACGTGCTTTTTTAAAAAATACATCT
TATATACGAAATATCGTAAGCAATTTGCAGTTTTTTTTTCGAGGAGTAGACTAGTCGCTG
GTATTGTCATTCGTCTCTAAAGGCTGAAGCAAGCGAGCACTTGAGCTTGTGCTAACAGAA
ACACTTACAAAAACATATGATGAGTGGTAAACTTCTACTTGCTTATTTTTCGTGAGCACG
TTAATCTTATGAATATGTTCTTTACAACAAATTCTATAAGAAAGATGTTTTAAAAGCTAA
ATTATATTAATTTTCAGGTTTTTATAGCTAATACTTAATTATATGCTAATAAGCCACCTT
ATTTTTCATGTTGGAGAGTAGGTTCCAGACCTTTATATTCGAACACAACCTTAGAACTTA
TTCAGAAGTTATGACTATAGTTGTACAACCAGCTACTATAGAAATAAAACTTACATTTCT
TCAATCGCTTGCAGCCACAACAAGAGGCGCCAAACAAAGTCTTAGTATTAGACAAACCTA
TTGTATGTATCATAAAAAATTATACCACATTACTCTTTTTAATATGAAAAATAGAAAAAT
AAATATTTAACCTTTCTATTACTTTTTAAAGGCACAACTAATTTTTAAAGTGGTTTTATA
ATATAAGACATGCATTTTTATCATAAATAATATTCCGCACAACAAACTCATGAATATAAA
GTCATACTATACAATAAACTTATACACTACCAAGTACCAACAATGTACTCCATGAATTTC
TATAATTCTTCCGTACTTAAGGGTAAAATGGATTTTTTTTAAACGAACAACTAAAGCTCA
ACCGGCAAAATGAGTACGTAACGTAAATCAAAATCAAATTCCAAACGTTTATCAGAAAGT
GAGCAAAATATAAGCGCATACATTGGCCGAAATTTCTAAGGCATTCGAGAAAATTTCCCC
ATAAAAAGGGCAGTATATATTCATGAATTCGTCGAACCCTTTGTGGTGGGGTCCCTCACC
CTCGGCACGTAGCCACACCTGACGTGCACCGTTAATTTTGTGCGCGTGAGAGAGGGCGCG
GTCACTTGTATGTATACCCTCGCTAGTCAAGAGTCAAGACGCGCGCCCATGGATTCGAGT
AACGCCTGTACGTAATCCTCCCCGGCCTAGTCGCGATCGGTCGGTCCGATCGATCGAGTC
CACGGCCATGAGCTTAGCTTGTCATGCACGTAGCTTAATTAGGCCCGGAACTTCCAGTCT
CCATCGATCCGATCTCTCTTGCTCGCCTCCAAAAACACAATGGCGTGTTAACAATGATGA
CGGTTACTCCCTCCGTCAAAAAAAGACAAATCCTTAATTTCCGTGTCTAATATTTAACTG
TTCGTATTATATGAAATTTTTTTATAATTAGTATTTCCATTATTGTTGATGATAAAACAT
GATTAATACTTTATATGTGACTTATCTTTTTAATTTTTTATAATTTTTTTAAATAAGACG
AACAGTCAAACGTTGGATACGGAAATCCAAAGTTTGTCTTTTTTTTTACGAGGGAGTAGC
TGTGGCTCGTTCTCGAGGTGGTGCTGTCGCATCCTTTGAATTAAACGCATGTGTAATCAT
TTTTTTTTCTAATAGAAAAGGGTAAGGTGACGCATGCTAATGAGTTTGTGCCGATTCTTC
GTTAGTTTACTCAAGTAGATATGGTAAACAACCAAACAATAGACTGAAACATGCATAAAT
TGCATACAAGATATTGAGTTTTACTTTTCCATGGAGTTGAATGCCTTGGAAGGAGCAGGC
ATTTTATACAAGTTCGTAAAATATTCAAAATTCGCAAGAAGCCAAAGCACCGTGTCCACA
GCGCGCCTAATGAGGTAATGCCAGGTTTGATGCATCGGATATTTGTAAGAATGAATTAAC
CAGCTGACGGGACACTGACGTTGTACGAACCCAGCAAAATTCAACATTCTGAATAGTACC
CGAATTCAATTCCTTTCCGGGTTCAAATTCTCTTTTGAACTTTGCGATGCATTTATCCTT
ATCCATCACACGCACACACGGCACACGGGTGTTTATGCTGGTGTGCGGCGAAACACCCCG
AGTATTTCCCTCGTTTTGATCATTCGATCATTCCATGGTTTGGTTCCACCATTTGGACAG
TCAACCCGGCAATTGTTGGCATCAAGCGCGGCGGATGGCAGCGACCGCCGACCGGTACAC
CGCCCATGTGCCACAGCCCGCCCGCCCGCGCGCGCCAGCGGCCAGCCTCTCGCGAATCGA
TCCCAAAAACACAACGTTTACAAAAACTATTATGAACTAGAGTGGATTTTAATAGGAGAT
ATTTATAATTGTTTACACACTTAAATAATTAAAAAACAATGGTAAAATTAAAATTTTGAG
AAGATATATTAACATATGATATATCAAATTTTAAGTTATACCATTTAAAAAAGGTAAATT
AAACAATAATTAATGCATATTTATAGTTAATTTTTTTATAATATGTTGAAGTTAAATTTA
AATTTGAATGTCTGTGAAGCGATTTATATTAATCTATCTTTTCATAAAAAGTTTAATATT
TTTTTTGCGAGGAAAAGTTTAATAATTATTTAAGTGTGCATACCAACAACAAGGGATGTC
>Os05g0453300|Os05g0453300	Os05g0453300; upstream from -3000 to -1; size: 3000; feature type:gene; location: Oryza_sativa.IRGSP-1.0.46:5:22241633:22244632:R
GGCTATAAATCTGTAGCCCACTGCTCTTCTCTCTCTTCATTTATCTTCTTAAAATATGTT
TACAGCTAACTTATAGCATGCTATTGTAAATGCTATAAGAGCACCCGCAATGGTAAAGTA
AGGTGCTCTCTATAAAACATGTACATCTCAGCAATAGACTAGATTAATAGTAAACCACCT
CAATAGTATGTCTACAACAGTATCTATAGCTCTCTCATGTATTGCCTCGTTTTTCTCTAT
AGACTATCTCTAAGTTAGTAGATAGTTTTGCTCTCTCTCTTCATTTAATATCTTTCAAGT
AGAAAAATATGCTGACATGGATCTCTTGTAGAGAGCCTATAGATAACCATTGTGGGTGTC
CTAAGTGCAAGTACTACTACCGCTACCGTAATCAGCAACTCATCGGCCGCTCTTGAATAA
AAAGGATCACGTCGCTCTCCGGGCACGTCACGAAATAGCGGGCTCACCCAATCGGGATCC
GACACAGGACACCCCGGGCTTGCATCACTGCAGGTTCATGTTTTCATTTCGCTCGTATAG
AGTAGGGCATCTACAATGTGCTAAAAAGTAGGTAGTAAGAAATCCTACTACCTAGTTTAC
TATTATGAGGCATGTAATAAAGTGAGCAATAGTATCATCTGGGTAGTAGCACTACTATCA
TGTAACAAGTAATAAACAAATATTAAAACTCTATTATCTCTCATTCTTTCTCTCTACCTC
ACCCATCCACTCCTCTTAAATGTGGGACCCAGCTTACCTATACATTGTGAGAATCAAAAC
ACCTACTATCCAGTTTTGTGGGTCTCATCTTACTACCCACTTAGTAAATATACATTGAGG
TAATAATATCATCCGTTGTCATCGTCAGTAATCATCGCTAAAAGCAACATTAGCACCACG
CAAACGGTGGAAATCATGTCACAACCGTATTCCCCTGTGTGCATGGGGCTCTCTTTTCCT
ATTCAACCATGCAATCAATCGTTCTGGTTATCTTTTATTCTTTCGTTTTTTCTTTCTTTT
TTATATACCAGATGAAACCAGTCATTTTCTGGTGGGTGAACACGTCCCCACGTCCACCGC
CTCAACGCCTCACCCTCCTGATCCGGATAGCGTTTTTTTTCCAGAAAAAAACCCGAGAAA
AAAAATGCGTAAACACTTGAAAAAAGAGGGGCAAACGCTAGCGTAGTTTTTTTCGTGGCC
TCCCGAATTTCATTGGACACGATAATAACAGCGGCCTACGCAACAAACACTTTTTCTTGT
AAAGAAATTTTATGGGAAAAAGAACTACAGAAAAAGCTTTTTATTGAGAGGGAAACGTGA
AAAACTTGAACGAAAGGACGCGAAAAAACTCTGGGTACGATGGTTTCGGCGAGTTCGCAG
GACCAAAAGGGTCCCACCACGTCGGCCACAGCGGTTGCCGTGGACCCCACCGACCGCGAC
AACCGCGCCGCCGTTATAATTGACGGAGAGGGAGGGTGACGTGCGTGGCGCGGGGCCCGC
CCGACAGCGACGTGGGCGCCAAGCCGTATCGGGAATCTCCGGCGTGGCGCGCGTCAGCCA
GGCGCGCGGAGATTCACAGGAATCCGAGAGGCCGCTCTCCTCGGTGGGACCCACGCACTG
GGGTGCGGCTCACTGACATGTGGGCCCACGGAGAGAGCGACAGGTGGGCTAAGCGAGGAC
TACATGGCAGCAGTTTGCCGTTTGCTTGCCTCGCCCTTATCCGCATTGCCACCACTTCCA
CGGAAGGGATTCTGACACGCCACTGGAAAACCTGCTGCAGTTTCGATCAGTACTTGATTT
TAAAGGCAAGGCTTCAAATTCAAACAAAAAATGAGAAATTATTTTTTCGAAACGGTGCAT
GCGTAGGGGCAAAAAAACGGTCTCCCCAGAAATCAAACTCCCCTCCCGCCACACGAAGCA
CCATCCCGATCACCAGAAGGGACGCCTCGGGTGGGTCCCGTGGTCAGTTACCGATGCAGC
GGTTCGTCGCCGTCGGCGTCGTTTCATCTGGCTCGTCGCCGAACGGGCCACCCGGTCCCG
GTTCAGTTTCACCGCTTTTCACTCGATTTATGGCGGGTTATCGGGCGATGTGAAAAATGC
AATGATGCAGTGGTGCGTTACGGTGCGCAGCATTTGCCTACTACTGCTGCTACGTGACAT
GTGCCCGACACCACACACACATCATACCACTGCCTCTTTCTCTTTTCCACTCACCGTAGT
ACCAAAACTCCCCGCTTTAAAGCGCTCACGACTTTAATGCGCTGTAAAAAAAAATCGTCC
TGAGAATATGCAATTCTCGTGACCGTATGGCGCTAACCCATCCCTTTACCCCCGCCGACG
TGGCGTGCATTCAATGGAGCAATAACAATCTCACTAGGTACACGCACGAAACACGCCGTG
AATACGCCGTGATTGGGCACTGTTCGGTGTGAGATTTTCACAACTGGGGATTGACGAGAG
GTGGTGCGTACAGCGGCCAGGGTAGAGTGGGTGTTGTATCGCCGATGTAAAAGAAATTAA
GCTTTTGCTTCTGCTCCATTTTGGGTCCATTTGGGTGGTGTGATCTTCTCTAAAATCGGT
TGAACCACCATTTAGCAAACGGTGTAGTGGGTGAAATGCGCTTGACATGATCGCCCCACG
CACACAAACATCCGGCAAAAATATAGGAGTAGATCCGAGATGAATTCGTACCACAACTAC
GTACTGACCCCATAATAACTCCCTCGGTCTTGCATTGCACGGCCCAAAAAATACGCGCAA
GAGTACTCGAAATCCCCCTCGCTGACGCTGAACAGGGGAGAGGCATTTGGGGGCGCTACG
GTTCACCGGCCGTCACTCAACTCCCACTTGCTCACCACTCCAAAAAAAAAAAGAAAAAAA
CATTTGATTTAAACCGCTTAATTTACGCAAAAAAAAAACACTGAGAGATGATAATCCGGC
TTCCCTTTCTCTCTCCTCTCGCTCGCCTCTTTTATAGCCCCCGTCGCGGCGAGGCCGAGC
>Os12g0115700|CHI	Os12g0115700; upstream from -3000 to -1; size: 3000; feature type:gene; location: Oryza_sativa.IRGSP-1.0.46:12:768579:771578:R
TAGGACGAGGGATCAGCGATCTCTGTGACGAACTGCTGCCTCCGACAAAGGCGCCGGAAG
GCAGACGGGGACCTGCGCGTAACGTATTTAGTTAGGACGTAGTCATGTTACCGAGAATAA
ATCATATATACTTGAACTAACCTCTGGGCGGAGCAGTACCGTGCGAAGAACCAGCTGTAG
GTCGCACAACTCCGGTACTAGGGGCGCGTGGACATGGTGGTACTGGACCAGGTGGAGGTA
CCGCGTCCATGGCGCTGCAACAAGAGAAGACGCGCATGACAGCGTGCATCTTCTCTTGCA
TCCGGTCGAAGGTAATCCTCTGCTCAGCATCACTCAAGTATAGCCCGGCGTCCAACCTCA
CTATTATCGAGGTAATATCGGCGTTCACAGCTCGTGCCGTGTCGGCCTATTCAAGACATA
AGACAGCATGTCAGTAGGAAAATAATTGAAGGAACTGAGTAGAAACTATTGCCAGAAGTG
AGTAGAAGTTCGACATACCCCCATGAAGTAGTCTCGGTCACGGTGCGTGGGGTACTCGTC
CCTGACAGTGGCAAGTCGCGGCTGTGGTGCGGCTGGAGTGATGTTGTTGCGGTGATGTTG
CAGTGATACTTCTTGACATCTTGTAAGTGGCACTGGTGCTCGGTCACAATGCTAACTTTC
CAATAATCTTTCCATGTACCCTTATATGCATGAACACGCCACGGACAATCTTCTTTCACG
CACCTCACTTCATACACATAATTGGTTGACTTGACCACCCTAAACTCTCTCATCAATGAG
ACCGCCCAATGCTTCACTGCCTCCTTCATATCCTCCTTATGAGCATACGTAGCACCCTCA
ATTACCTCGTTATCCTTGTATTCCTAGGGTACATGATGTTCCTCTGAGATAACAAGTCCC
GAGAAGTCCTCATTTGTCCAATCAGTGGGCATTACATCACCTTCCTCGTCGGATGATGCA
TCGCCCTCCGCTTGCTCGTTATCCGAATCTTCCCTCTTCATTTCATCAACGATTGTACTG
ATTCTCTCCCCCTCATCTGCCACGCCCATGGCCTGCACCACCCCTGTGTCATTTCCCTCA
TCTTCCCCCGATGGTTCAACAAAATCCCCCACATGGCTTGGACCCTCGACATCTTCGGTT
TCCATTGCAATATTTCTATCATTTTCATGCACCGACACAAAAATAACCAAGGGCCATGAC
CTTTCAAAAGCCATCTCCAGATACCGTTTCCAAGCAATAGTGCTATGCGCATCGGCATGA
GTTCCCAAAAATAACCTTCCGTTGCACGACTCACTACAACCGATACTGACATTGTGTGGA
CTTCTGAGTCTATTCTATATCCTTGCATCAACCAATTATAAATTGACTGAAATGATCTCT
CAGCAGGCCTATCGATGCCCTTCGATGTCATTACAAAATCTGACAGATCAACACCATCAG
GACCAAATCTAAGGTTGCCTTCACCGTGAACTATCTGAAACATGACCTTACTTGACATTG
TGCTTGATGAAAAAATATCTATGTTAACTAAGTTCATATCATACTAACCAGATCTAACCC
CCCATTCATCAATACATACTACGCCCTAAGTTAAAGATACTACAAATAAGTTGTATGTCC
TATGTCTCAAATTCTAAAATAGGCTGTGTGCTACAGATCTACTAAAGTATATGGTAAAAA
AACTAAAATGCAACAAAAAAAATGGAAACACATTTCAAATGAATGTATTACCTGTGATGG
AGTCAGCAAACCAGCAGGGCTTCGCCGCTCCCCTTCTCTTCCTCCTCACCCCTCCCTCTT
TCTCTTTTTCTGGATTTTGAGTGAATATAATGAAAATTCTGAGAGGGGGAAGGGGTTTTA
TACTCGGAGGGGTAAAAATCGCCCTCCCTAAGGGCGGCAAGGGGGCCGCCTGCAAAATTC
CAGGCCGCCTCGCCGCCCTTTTGCAGGCGGCCCCCCGCACAGTAATAAATCGCCCTTCGG
GAGGGCGGCAAGGGGGCCGCCTGCAAAAAACCAGGCCGCCCTTTTGCAGGCGGCCCCCCG
CACCGTAGTAAACCGCCCTCCGTAAGGGCGGCGAGGGGGCCTCCTGCAAAATGGCAGCCC
CCCTATAGACGGCCGTTAGGCGTGCGCTAACGGTGGTCAGCCACGTCACGAAAATCGCCC
TCTGGGAGGAAAAAATCGCCCTCCCAGAAGGCGGCGGGCGACTACTTTTGTAAAATTTTG
AAACACAAAATTACTTTTGTAAATATTTTAATAAAAAAAATTAAAAATAAAAAAAATTTC
TCCACCCGGGTTGGTTCATCGGTACATGAAGAAGCCCATCGGCCCAGCATCAGTTTAGGC
CCAAATGATCAGGCGGCCCATCAAATATGTGCACATGTGCTCTTCAGTGGTAGCATAGGG
TATAGATTATTTGACTGTACGATTGGAGGGGACAACTCCTCTTTTTTATATTACTATATA
GAATATAGATTATTTTGTGAAGTCACTCGCATAAATACATTAAATATTATAAAGCTAATA
AATAACTTTGAAAAAGAAGCTATTTAAACCATGCTTAAAAAGTTTGAGAAAACATACTTT
CGGAAGCGTGCTACCTACATTAGCTGTTTAAAACGCCACCGAAGTGATATAAGACGAGGA
CGTCCTAACAAATTCAGTTTTAATTTCCTCGTCTTTGCATATATGGAAGGAACCGAAGAA
CTTCACCTCAAAAAAAAAAAAAGAAACTCTGCTCTTAACAGATTAAATCTTGTTAAACTA
GGATTAGCTTCGGTTTAAGCTGAGACTGCGTTTGGTGAACATTGCTACCTACCCATCCAT
TAGCAATTTAGGTCTCATTTTTTCTTGAGTTGCAGCGGTTTGGGACTTTGGGAGTGGTAG
GTGTATCTGACAGTCTCGAATGTGCCACATCTCTTTTCTTCTCTCCTGTCTCCTTCTCCA
ACCTAACCCCTGCCTGCCTGCATCAACCATATATGTTGTCCTTCACCAATAAAACACATT
>Os02g0744000|Os02g0744000	Os02g0744000; upstream from -3000 to -1; size: 3000; feature type:gene; location: Oryza_sativa.IRGSP-1.0.46:2:31199228:31202227:D
ACCTTTTGCACGATCACGAGAGCCCCCCCAGATTAGCCAAAATTCAGTAATATTTTACGT
TTTGATCGATCGATTTATACCGAGTCAAGGAAGATCAACACCAGCCTACTGTAACTTGCC
CTGCTCCTGATGATGTGCACGACGGACAGCGGGATGGACAGCACCAGGTACGCAGTAACA
GCCGAATTCGCCACCACGAACAACCTGGTGACAACAGGAAGGAATAAACGAGCTTGCAAA
CGGAAGTAATGCAGATTGACGATTGTAGCTAGAAGGCAAGAATGGTCGCACGTTAAGGTC
GGGAGGTCACTGTACTGCGCCTTGAACCGGAGGAACTGCGTGAAGAACGGGAGCGTCTGG
TTGGTGGTGCCCATGGCGATGGCGCTGTCGACGATGGCGACGACCGCCACGACGCGGAGG
ATGAGGTCGGCCACGGACAGCGCTCTGCTCGCCGCTCCGCCGCGGCTGCTGCCGCTCACC
ACGGTGCGGGCCGCCGTTCTCGAAGCCTCGCCGTCGCCGTGCTCGGTCGACGTCGTCACT
GCGGCTTTTCCTTCCATTGGTGACGCTTAATTAGTTCAAGCGAAGGTGAAGGATGCAGAC
TCGCTGTTCTTGATGAAGCAGGATATACGACGTGTTCGTGTTGGCGTGTTGGTGTTGCAA
GCTTGTGTGGCTGTGTGCCAAAGTGTAATATTCTAGTATTACGAATCTGAATATATATAT
ATATATATATATATATATATATATATATATATATATATATATATATATATATATATATAT
ATATATATATATCATATTAGAATATAATATATACGGTTTTAAATTTGTATTTTATAGGAC
GGAGATAGTATACAGGAAGGGACAGGGCCGAGGCACCCATGAAACTAGCGCGTGTGGGGT
TAGGTGATTGTGACGTGAGTAATACATGGCATGATGCGTGCCCCGCGCTCACCGGCCGGT
GCATGGTGTTTGGTTGGTACCAACTGTCGCTTGCTCCATCGACATAAACAGCATCAGCTA
GACTTGTTCTATGTTCAGTACTCCGTACTGCTAATTGGACCTTTTTCCAATGTGTGAAAG
TATCACTTGGAGCTTGCGTCCTTGTGTTTATCACTTATCAGCTTGCAAAAATGGGCTGCC
GAGCTTAGTGCTATGCCTGTAGTTTGTGAAGTGGGTTGAAACATCTCCACAAGTGATGAA
AGAATTATTTTTAAATAGTTCAACATAAGTTTGTTTTTTTTCTAGAACACATATATTTTT
ATCAAAATATATTCATGTGAGATCTTGTTATAAATTATAGATTGGATATATATTTTAGAA
TAAAATTATGTTTAAAGTTTGATTAAGAGAGACAGAGTAATGATGCCTCACGTCATCTTG
GCAACCAGGTCTACTCCTGCATGCATGCATGCATGCGACAACCTCGCTCCTTCAACGTGT
CCCTGCATACAAACGAGGAGCAGCGTCTTTAAAAAAATATTGAACGTACGATTGGTAGGC
TCCGATATTTGAAAAAATATTGAACGTACGATTTGTAGCGTCCGATTTAAAAATATTTCA
ACATAATTAAGTATTTGTGCAAAAATATTTTATTTTTCATATGATTTTTTTTATGTTTCA
CTCATTGGTATTTAACGTTTTGTGTAGTGGTTGTGATTGTTTCAGTTAGTAAATTGTTGT
ATTTCTCTAAATTTGAAACAATTCACGAGGTGAGTTGTAATATTTGTGTACATGTGATGA
AACAGTTTTCTATCAATGGTGAGACAAGTTATTTTTTGAGACACATGTATATTTTTATCA
AAATATAACCATGTGAGATCTTGTTATAAAGATTTAATGATGATGAATCTAATGGTATCA
TTGAAATTTAGATCAGAATATATAATTTTGGAGAAAAAAATATTTAAAATTTGAGGAAAA
AATTAGGCACATGTAATAATAGAAGGGAGAGGGAGGGAGCGTATGCAAGCAGCAGCGCAA
GCAACACATACAGGGGAGGCAAGCAACGTGGCACGTGAACAATGCAGCATGGGCGGCCTA
CATGCATGCGTATGCGCGCGGCAGTGCGGGGGTGAGCGTTGACCAGCAAGTGAAACATTA
TGTTATATATGGTGAAACAAAAAAAATCAACAACCGAAACATTTAAGTATTTTATGAAAC
ATGGTGAAAATACACGTTGAAACATGTCGCTGGCACATATGAAACAACAAGTATTAACGA
ATTGAAACATATATTTTTCTTTTATCAAAATAAAATCATGTGATATTTTATTGTAAAGAT
TTAATTAGAACAAATATAATGGTGTGATCGGATCATAAATTGGATAAGTAATTTAAGAGA
AAAATTATTTTGAAGCTTGCTAAAATACATACATGTGTGCATGGATGAGGTGGAGAGAGA
GGAGAGAGAGTAGTAGCAGTTAGTTTCATGAATTTTGTGAAACACACCGATGACACATAT
TGAAACATATCACTATCACGTACGAAACATTTTGTTTTAACGTTTTGAAATACATGTTTT
TCTTTTGACATAATATAATCATGTGATATCTCATTGTAAAGATTTAATTGCAACGAATAG
AACGGTGTGATCGGATCGTAAATTGGATAAGTAATTTAGGATAAAAAATATCTAAAGAGA
GGAGAAAAGAATGAAAAGAAGCAGTTAGACACATACGTTACAGTGACAGGGTTCGTTCTC
ACATGCCTGCATGGGCGTCCGATTTTTGGTGAGATGCCGGACGCCAAGCCGTAGCGCCCT
CCAAGAAATGGCGGACGGATGCACGTAACGGGCCACGAGCCCACGGGTCAACCTAATCCC
ATCCGGCCCAAACATGACCTTGACCGGGCAAGGCCTAGCAACGCTCAAGCCCGCTTCAAC
CAAGCCCAAAATTCTTGTGCTTTTCGTCTGCCCAAGATCAGACAATGGTTGGCCACCCAA
AAGTCTGACCTTATCCACTAAAATTTTCCATACAGATTACAGGTTACAGGTTTCACCCCT
>Os04g0508800|OsRFP	Os04g0508800; upstream from -3000 to -1; size: 3000; feature type:gene; location: Oryza_sativa.IRGSP-1.0.46:4:25429269:25432268:R
TGTTAAGCCTCAAAATGTTCTGAACAATCTGCAGAAGCTTCAGGGTGGGTGAACCAGTGC
TTGTTAAGTAGGAGTACCATACTTATCTTTTCGCGTAGCACTAATCCATCAACTAATCAA
GCCATTGACTATGCTTGGCGTGGGTGGTACTATGTGTTTAGTGTTTACCAGCTACTTTTC
TGTTGCTTCCATCGGTGTACGAATGAGCTGTCTGCTTGATTTGTCAGTCTCGTTGTTCCG
AAATATGTACACACGTGAGAAGGAACGTGTTACTTAAGGCATCCTAGTCCTTAGTCGGTG
AAAATGCCACCATAAAATGGGTACTTGTTTATTTCATTTTGAAAGGGAAAAAAGGAAGTG
AAGTTATACAGGGATGACCAATCTGTTTAAGTCAGTCAAATTACAAAAAGAAACTGCGTG
GCTAGCTGTTTCACTAAAAACCCACAAAAAAAGTCTTAGCACACAGGTAATTATGGTGAT
TGCAAGTAAGTACTTTGCTGCTAAAATATTTTAAAACTTCCATTCCATGTTGTAACGTGT
TTTATTTGACACAAATCAAACTTCTATAACTTTAACCAATTTAATAGAAAAAAATATACC
GACATCTATTATACCACATAAATGCATACCAATTTAATGTTATGGCTGTTCCGTTACAAT
TTACAAATCAATTGTCATTGTTCCAAGTTAAACATATCTATGATCATCATTTTTTTCTAT
AAACTGGTCATACTAGGGAAAATTTATTTTTTTTTTTCAAAATTTGGCATTGCGAAAAAT
TTAGCAAGATTGCAGCATTGATAAGTTTTGATAGAAAGGATAGGTTAAATGTAATTCTCT
AGGCATAACCAATATTTGATAACAAACTAAATATTGTTATATATTTATCAACTTTATCAA
ACAGTAGGATAATTTAAAATGACATCGATATGAACATATCTCTACTACTTAACCGAGCGA
AAAAATAACCAAGTTTGTCCGATAAAAAAACCGGGCGAAAAAAAGTGCGAAAAAAAAGAA
AAACCAAATATGTCCGATCCAGAAAAAAGGGGTGGAAAAAACCGAGCGAAAAAAAAACCA
AAATTGTCCGATAAAAAAAACCGGGCGAACAAAAACGTGAAAAAAAAGAAAAGAAAAAAC
AAAATAGCGATAAAAAACGTCCGACTCGGTCCCGTAAAAAAATAGCGATAAAAATAAAAA
AAAAGTCCGACTCCTCGTTGTGATTCCCTCTCAGAAACAAAAAAAAAGTCCGACTCTAGA
TCCGAGTCCCACTCCTCTCGGTTTGAGTCCGAGATACTAAGCACCACTTCTCTCGGTTTC
AATCTATACCGTGATATTCCATACATCTTGGTGAAAAAAAATTGATGTGCCGGATTGAAG
ATCTGTTTGCAAAACGGAACCTACATGTCGAGAGCATTCCATTTTTATATGATTTTAATT
TTTGGGTTTATACATTTGCATTTGAGTCCCTGTAATTTTTATATTTACATTTGAGTCCCT
ATAATCTTGCAATAAGGTGCTTTTGGTCTTTTTTTTAAAAAAACAATAAATAAAAGGGAT
AGAACAAAGGCAGAAATATACATAAAAAGAAAAAGAAAAGCCACACAAAAAATAAAATAA
ACAAAAAACAACAATAACAAAAGTCTATTTCCCCTAAGTGGCGAAAAAAAACTGTAGATG
CAAACGGAAAAAAAAAATCCGATTCCTATAAAAGGCAAAAAAAAAGTGGTGAAAAAAAAG
CCAAATCCGATTCCTTTAAAAACGGAAAAAAAAGTCTGATTCCTTCAAGGCGAAAAAATA
AGAAAAAACATCTTAAAAAAGTTTGTCCGATACCCTAAGAAAGTGGCAAAAAAAATGGTT
CGTAAAAAATAAAAAGCTGGTTTGTATAAAATAAAAAAAGTACGTGAGAAAAAAATGGAA
AGGGCGAAACAAAGTCCAATTTCTAATCACTATAAATCTCTTCTCTATCTCTAATCTAAT
CTAACTATTTAAAAATAAAAAATACACGAGAAAATAAAAACGGTCAAAAAAACGTGTGAG
AAAAAAGTCAGAAAAAAGCGCAAAAAACACGCTGAAAAGGTTTTTCCATCTTCTTAAAAA
AAACGCGTGAGAAAAATTATTTCCATTGTCGGCAAAAACTTTTTAAAAAAAACATGCGAG
GAAAAGACTGTTAGAAAAAATGCGCCATTTCTAAAAAAAAATTGGTTTGAAAAAACCACG
CAAGAAAAAAAAACACTATCTATATAAAAAAATCGCTTTGAAAAAACTGTCAGAAAAAAG
CTAAATTGATGGACGCTTGAGTCAGATTTGATCCATCTATTTTTTACCATCTACTACACG
GCTTTTATTTCGTCATATATTCTCATGTATTGGAAAAACGCAAAAAATAACATTTAGAAA
AAACAGGCAAAAAAAGCACGCGAGAAAGTAATTGTCAGAAAAATAGGCAAAAAAACACGT
GAGAAAAACAAAACAAAAAAGGGAGAAAAATATGGTTTTCGTCATAAGTAAAAAAAGGAA
AAAAAATATGCTAGGAAAAAACTGTTAGAAAGAAATGCGCTATTTCTGAAAAATGATTTG
AGAAAATCGCGCAAGAAAAAAAACACCGTTTATAAAAAAAATAAGCCGCTCATTAAAATA
CAAACATTGTCATTGACATGATTATGCATGAAAAATGTATATTATCATTAGAATTTTTTC
ACCCGTTGCAACGCACGGGCATTTTTTTGCTAGTCATTATAAAACTAAAGGTATGAAAGG
GAGAGACTTTGTTTCTCTTTCTCAAAAAGTTAAAATATTCGTATTTAAGACAGCACATTC
AAATTAAGATAAGACTCTCAAGTGCATCTCCACTGACAGGTGGCCCCCCTAGAAAAACTA
ATTTCCTACTCCACTGTCAACGCTTCCGCGCGCGGGTCCCACCCCACCACCACCCATCAC
TCGCGAGTTAACCCATCGCTTTTTAAACACCCCCCGCCTCTCTTCCGTTGCGATTCCTTG
>Os06g0716000|Os06g0716000	Os06g0716000; upstream from -3000 to -1; size: 3000; feature type:gene; location: Oryza_sativa.IRGSP-1.0.46:6:30405686:30408685:D
AATTACCCACCATGCCACCCACTCCCTCTTTAGACTTGCAAACCCAATAATTTAGGCTCT
AATAATGTAGGAAAGAAACAATTAACCGCTTATTCTACTACAGATTATAACAATCTAGCT
TATAGTAATCTGACTCAGTAATCTAGATTATAATAATCCTAAGCTGAAATAAACAGAGCC
TAATACTGGTTGGTAAGCACAAACGCTTTGATTGCAATTAGTTACTCCTATACGTGCTTA
CCAGCTACTTCATCCGTATCAATTTACTGTTCTACTCCCTCTGTCATATGATATAGCAAC
CAATAACTGAATGGAACGCCTCCCTCCGTCTTATAATATAGCGTAGTCACATCCGGTTTT
AGGTTGTTGTATTTTGGGACGGAGGGTATAATAAATTTCACACTAAATTAAGAACAAAAA
TCATAATAAAAAGAACATGACATACTACTCTGCAGTATATACTCTCTTCGGCATAAAGAA
AAAAAAGGTAAGGATTTAAAAATTTCTATAGCTTTCATTAATATGGGGAGAAAAATTTAT
GAGGAAGAGTAAACCAGAAGAATGAGAGAGTACTGTTGGGTTGATGGTTAAAATAATACT
TCCTCCGTTTCACAATGTGAGTCATTTTAGTATTTTTCACATTATATATATTTATATAGA
TTTATTAACATCAAGATGATTTCTAAAAAAAACATTAAGATGAATATGGAAAATGCTAAA
ATGACTTACATTGTGAAACAGGGAAAGTAATAACAATGATAATATCATAGTATTAATGAG
ATTTTAGAAAGCTAAACCGATAGTATATACTTTACGCATCTGACAAGCATATGCAGTCCT
ATTTATAGTAGGAGAACAATGACTTTTGTTTGTGATCAAAGGACACGTGCGGTTTTTCCA
TTGACGGTACCTGCATTAAGGTCAAAATTAAGCGTGTTTCGGTTTTGAAGAAGCCAAATC
CAATTTTCAACTATGCACACATAACTACCATTTCGTTCGGAGACTAAACCCAGCAATTTA
GCATACGTGGTCTAATCCTACCATCGACAATAATAATATAAATTAATAATAACAGAGGAA
AAACATTCAGCAACAGTATTACTCACAGCAAGACTTTTTAATCTTGCTGTATCTGTAACA
GTACACCCTTCATCCAAAAAAAAAATAATTTCAACAACAAATCTAAATATAGACTATGTG
TAGATTTATAATAAAAAAATTGATTCTTTTAATTTTGAATGGAAGGAGTATGCAGTAGTA
GTAAAAATATCTCCTAGAGAATTTTTATTCTATGAGAACAAATTATATATTAAGCTCTTT
TTTTTGCCCTATGAACACACGCACGCAAACCCTACCCCTATGAGCATCTTCAAAGACTGG
GCCGGACTGGGCCGGCAAATCCTGGAGAGATTGACGAAGTAAACCCTACCCCTATGAGCA
TCTTCAAAGACTAGGCTGGACTGGGCCGGCAAATCCTGGAGAGATTGACGAAGTTACCAC
AGGCGCCTAGCTGTTGACGGGTACGTCGCCTACCACTGAAAGCACAACGCCGATAAATCC
TGGAAAATTCGCTCCCATGGGGAGTCGAACCCAGGACCTTAGGTGCTACTGAGGCTCTTG
TAACCACTAGGCTACAGGCCGATATTAAGCTTTTGAAACAAAAAAATTGGTTACTATTAA
TATTTTGAAGTTTCTAAATGATGGTCAAGAAATTAATCGACTTAATTTACCCTATTCATT
TTCATATTACAAGTTGTTTTGATTTTTCTAATCAAGTTTGTAAAAAAAAAGTAACATCTA
AAACATCATATTAACTTCATCAAATCTAACATTAAATATACATTTTGATAATATGTCTAT
GTTTATTTTAATTAAAAATATTACTATATTTTTAAAATTTTGGTTAAATCCAAAGAAGTT
CAACATCAACTTATAATATAAAACAAAAACAGTAGTAGTAAGTAGATACTTTCTCCTTAA
AAAAAATCCAACCTAAGATAGGATATGATATATCCTATTACAACGAATTTGATATTTTAG
GTTAGACTTTTTTTTACTGAAGGAGTAAATCTGATATATGACCATTTTGGATTGATGCCA
AAATGTGCCCTGCCAATTTATTGGTACCTTCAATAGTAATAGTATAGGTTTGGATTGAAG
CCAAATTGTTTGGCTATTCCTATGATCAATTTGGCACTAATCTAGAGTCTTCTTCTCTGT
ATCATCAACATTTGGCAACATATTAGTAGCAATCCAAACATGTATAATAAATCTCTACCT
TACAAAAAAAAATTGGTAATACCAAAACATGCCAAGAATTTGGTAGATACTCTCTCCGTC
TCATAAAAACGAATCTAGGACCGGATGTGACATATTCTAGTACTACGAATCTGGATATGA
TATGTTACATCCGGTACTAGGTTGGTTTTTTATGGGACGGAGGAAGTAAGGTAGAGAACA
AAAGAGCCCCATAATTTTTAGCGCAGTGGTAAACTGGGGAGTGGATTTTCACCCCTCGAG
GGGATATCCTCTTGTTGTTTGCACATCACTCAAATGGTTATGAAAAAATTTGAAAGAAAT
TGAGAAGATGTATTAACATGTGATATATCACTCCACAAACATGCAACTTCTACATCTCGC
AAAAAAAAATAAATTCGTTTGTTTTTTCGTTGCGAGATGTAGAAGTTAAATTTGAACATA
CATGTTTGTAGAGTGATATATCACATGTTAATACATCTTCTTAATTTTTTTTATTTTTTC
CATAACAAAGTTACATGTAAACAACGAGATGATGAAAATAGTTTCTCCGGTAAACTGTGG
TGGAGAAGTGGAGAACCGAATAGGCCTTGCAGAGAGAGAGGGGGAGGCGCGTGGCGTACG
TGAGCGTGGCGTGGGCGCGGGAGAGAGAACAAGTCAAAGGATGCGAACGCAACAAGACGA
GCACCAGCAGCATGGTCAGGACGACACAACACAACTAGTCTCCTCGACTACTCGTCTCTC
>Os07g0148900|PsaK	Os07g0148900; upstream from -3000 to -1; size: 3000; feature type:gene; location: Oryza_sativa.IRGSP-1.0.46:7:2543465:2546464:D
ACTCCCTCTTTGCAGTTGGGGTTTGGATGCATCATGTTGTATTAGTTCAATTGGTGCATA
AGTGTGTACTTCTGTCATCTTCATTGAACTTCTTGTGTATATACTACTAAAAGAGGCTTG
GCTAGTTGGATTAATCTCTATTGCCAAGTTTGCTTGATGACCGTACTGATATCCATCCTC
ATGCAAATCATTAAAATTTGCAATACCACTGAAGCGTGATGTTTGATTTTAACAGGAAAA
CCTAAAATTGAAAAACTGGAGATTGAAGGAAGAGGTTTCCACACTAACCTGTATGCTGTT
CGGGGTACCTATTCTGGAGGCAAAGAAGGCAAGAGCAAAATCCAATGGCTCAGGTCTATG
GTTGGAAGCCCAGATCTTATCTCTATACCTGGTATGATTATTTGAATTCTACATTTTTTT
TAAATGATATAATATTTACCACTTTTAAATCCTAATGGGCACAAGATGATGCCCACTTAT
TTTTGCTTCAATTCTTGGTACTTATATTCTTATATTGCAATTAACTTCTTGTGCAGGCGA
AATTGGAAGAACATATGAAGCCAATGTTGATGATGTAGGTTATAGACTTGTTATCATTTA
TACACCTGTGAGAGAGGATGGAGTTGAGGGACAACCTATCTCTGCTTCAACGGAGCCAAT
TGCAGTTGGTATAGTCCATTCACCTATCTTGTCGCCTACTAACATTTATTATTATCATCA
TCTCAGTTTTTTATCCTTTTGGTGATCCGGCAGCGGTTAGCTAAACAGTTTCTTCTAGCC
TCAGTTTACTTTCTGCGATAGTTATATTTATTCACTATTAAGTTTAATCTTCAGAGCATT
ACTTAAGGTTGTCAGCCTGGTCTATTAACTGCTTGGTTTTTTCTTATGCAGAGCCTGAAA
TTTACAAGGAGGTGAAGCAGAAGCTTGATGATGGATCTGTCAAGTTTGAGGTAATATTCA
TTTCAATACTGATGTTAGTTCCTTTTTGGTAGTATTAGACTACTGGACTGTCTCACTGTC
ATGGATAGCTGGGCCTCTTATTCGTCAAACTATGGAGAGCATACTTGTTTCCTATTTGCA
CAGCTAATGTTTCCAAATTTGAGTGCTGAGCAATTCTGCAGCAGAGTGATTATTTCAGTC
AATAGTAACTGTCTCAAGCATAATTACATTTCTACTTGGGCTATCTTTATTATCTAAAGA
AATGGGCTACCTTCACAGTAATGTTTTTTTTATTGTTATCATTGCAACAATTAATACTTT
GTTTAGTAACAAGTGCATAAAATTTGCATTGAACAGGTTTTGTGTGACAAGGACAGAACA
CCAAAAAAGGTATTTCCTCCTACATGTAATATATTTTTTAAATCACAATTCACCAGGATA
ATAAGCGTTGCAATCTACAAGTTACATTCTTTTCTTTTCTTTTTTTGGAAAAACAAACAA
TTTAACAGGCACAAGTGATGGGACATTTGGAGCGAAGAATTTTAGAAGTGAATAGGAAGA
GGATCAAAGTTGTAAAGCCTGGATCCAAGGCATCATTCCCAACTACAGAAGTGCGAGGAA
CATATGTTCCACCCTTCCATGTAAATTCTTGCATGAACTTGGAAAATAAAATGTTCATTT
TAGAATGTATAATCCCTGTCCTACGCAAATTTATAACTAAAGCTAACTGTTCATTGAATC
TTTCAGGTTGAGCTATATCGCAACGATCAGCACCGCTTCAAGATTGTTGTTGATGGTGAG
AGCGAAGTTGACTTGATGGTGCAAACTCGGCACATGCGAGACGTCATCATTCTGGTGATT
AGAGGTCTTGCTCAAAAGTTCAACAGCACATCTCTCAACTCACTCCTCAAGATAGAAGCA
TGAAGATCGAGTTGCCAACCTGATATAACTTACAGTATGAAACCGATTAGAAAAGGTTGT
TCAGTATCGATTCAAGTTGTTTAGTTTGGAGGATGTGTAATATTTATAGGATTTGGAGCG
TGGCAGCTTTTGTGTATGGGTGTGGTTGAGTGTGTTAAAGTTTTTCTTTTTCTCAAATCA
GGAGCGGGTTGCTCTTCTGACCCTGGTTTTCCATACTCATGAAATGTACATAGGAAAGGG
AGGGTTGGTGATATGGTGTTGCATTAATATACAAGTTGTGTATGCAATTCTCATATTAGG
CTATATGATTGATTGGGAAGATTTTCTGTTTTTTTTGGCTCGTCATCGTTGGTTTCATAT
ACAAAATTCGAAATGGAAATATGTACGAGTGATGGTTATTGAAGTGTCCATTCTATTTTA
ATTCTTTGCGCGTTGTGAGGTAATCTCATCGTGGTGTAGGCTTACAGCAGTAAGATGCGT
CGCCACGTTGTTTCACATTGCAAAATCCATTTCTGCAATTGCAAGCAATGGGCTTCAAGT
TCTTGATTATTTCAGTTCATGACTCGGCATAGCACCAGCAAAGGAGCAACTGGTAAAGTG
GCACATCCACTTCAGTGTCGATGCAAGCAACTCATTCCAGCCTACAGGAACAGTAAATCC
AGGTTCATTTACTCATTTTTCTGTGGTTGAAAAATACCAAGATTTCCATTTTTCTTACTG
CTCCACATAATTCCTATTTCCCATTCTCTTGCACTTATTCCAGCCTACAGGGACAGTAAA
TCCAGGTTCATTTACTCATTTTTCTGCGGTTGAAAAAATACCAAGATTTCCATTTTTTTT
TACTGCTCCACATAATTCCTCTTTCCCATTCTCTTGCTCACTATATATGCCTGTCAATTT
TTTTGACAGAACATGCATCAAGTCACCACCAACAACATTTGCAGCTGCATCCAAGAACAT
TGCATGCAGAGGTGAGCATCTTATCCACATTGGCAGGCTCTAACCAGGAGATGCCACATC
AGCAGCAAGGATCTGTAACCTATCCATGAGTGGCCACTGCAGTCCACAAGCTCCCCTTGT
GGCTCCCATTCCACATCTCCTCCAAGAATTAAAGCCCAATGCATCTCCATGGTGGCACTT
>Os03g0192700|OsINO1	Os03g0192700; upstream from -3000 to -1; size: 3000; feature type:gene; location: Oryza_sativa.IRGSP-1.0.46:3:4829534:4832533:R
TTTGTTAGTTTTCTTCTCTCTTCATGCACAGATTAAATTTAACCTTACATTGATATAGTA
GTAATATATAACATCACTTGTATGGTGTTTAACTTTTCATAATTGCTTGAGCCATTTGCT
AGAAACGAGGATAATTTAGAGTTAAATAATTTTCCTACTAACACCTTGAGGATGCTTAAG
ATTATGATAAACACCTCCTGATCGAGTAGGCAACTGGTGAGACCGAAAAAAATAAAGCTG
ATTTTTTTATTATTATTTTTAGAGAAGGGTATATTACCCGGCCTCTAGATTCAACCTTAT
GGTACTACTTATGTCACTGTAACCACTGGGGTACATGCCCTTTTGTTAAAGTTGAAATTT
AGACCTTTGACCTCTGATTCATTTTCTAGATATTCTCATCTATAGCCACCAATTCTTAAA
AGGACGTGACTACACAGCTAGTGATAACTGGTTTGTCTAAACTAGCTACCACTCCATATA
TGAGAGACACTATCCACCTATACTTTAAATACAATTTTCTCTTAAACTACTCATCCGATC
TACGATCCGATTACACCGTTGTGTTCGTAACAATTAAATATTTATAACAAGATCCCACAT
GATTATATTTTGATGAAAAATTATAAATTGCTTTTATAATATATCTAAATTACTTTTAGA
TTTCACTAAATTACTTCTTAGACATATGAAAGTAAATTCAATAAAGCCTAAAAGTAATTT
ACATATATTATAGAAATAACTTATAACAAAAAGAAAGTAACTTTAGTGAATGCCTTTTTC
ATTGGACGTGACTACACAGCTAAAAAAAAAGGAAAAAACAATCGATGATTAAATAGATTT
ATAGAGAGTTACTTTTGAACAATGCAAAAGTTACTACCAATTAACATTGAAGTTACTTTT
CAAAATTGTTAAACTTACATGTGTTGATCCGTGCTGATTAAATTTTATTTCTAGATAAAT
TTATATTGTTATTCCTACAACGAATTTACTTATAATGTATTGACAAAGTTACTTCCGTTT
TGTTTTAAGTGTTAAATTAGTTTTAGACTATATTGAATTTACTTTTATATGTCTAAGAAG
TAATTTAGTCAAATCTAAAAGTAACTTATATATATTATAAAAGTAACGTTCATATGTAAT
AAAAGTAATTTACAAATATAAATATTTTTTCATCGTAATATAATCGTGTAAGATCTTGTT
GTGAAGATTCAATTATAACGAACACAATGGTGTAATCGGATTATAGATTATCACATAGAT
TCTAAGTATCAGTAATCATATAATCCAAAAAAATAAATTGAAAGCTAGAAGCTGAAACCG
TATTCTGAAAAACTATCTACCAACAACAGATTCTCATAATCTTATGCTCCTTTAAACAAG
GCCCTATTTTGTTGTAGAACATAATTGTTCCCTAGGTAATAACTAATCCAAGAATTCACC
CTTCATCCAGAACACATAGTAACCAATAATGCCTCTAATGCAAAAACGGTACAACCGATT
TATATTTATTTGTATATAATAATGTCCTTCACTTAGAGAGTTAGGTTCTGTTTAGTTTCC
AAAACAAAAATTTTTATGTTATCACATCGAATGTTTGGACACATGCATGGAGCATTAAAT
GTAGAGAAAAAACAATTACATGAATTGCGTGTAAATTGCGAGATAAATCTTTTAAGTCTA
ATTGCGTCATGATTTGACAATGTGGTGCTACAGTAAACATTTACTAATGACGGATTAATT
AGGTTTAATAAATTCGTATCGCAATTTCCTGGCGGAATCTGTAATTTATTTTGTTATTAG
ATTGTGGTTAATACTTCAAATGTGTATCCGTATATCCGATGTGACAACCAAACCCAAAAT
TATTCTCCAACTAAACAAGGCCTAGAGGTCTCTTCCAAAATAGAATTGAAGGCTAGACTA
GGAATTAATCTCTTACTTATATATCGTAATCCATTTATCGTTTCAATTTCCGTTACCATT
ATCCAAAATATACATATTTATTTGTCTAGCTATCGCTATTACATATTAAAAGAATCATAG
TTATTTCCATTACCATTATCGGAAAAAACATTCATATTTATCTATTTAATTAGTTGTTGC
TCCTATATGTATTAAAAAAACCATTAATTATTTATATAGTAATCCCTCTACAATTTTTCG
TGGTGATGGAAACATGATCACCCTGTTTGTATTTTTATCAGCAGTGATTTATCATCAGAC
TCTCTTTCACCCTTAGGTTTGCTGAATTTCAGTGGAAAATTTGAACTCCAAACCTCTCCT
GTTTAAGCTCCCATTGGTTGCCCATTTGGCCAAAATAGCTTATTTGGCTTATTAGAAAAT
TAAAATTAATTTGTAAGTAAAACTTTTATAGAACTATTCGTAGCGACTTAAAAGCCAACA
TTAACAAAAAAAAATTACGTTAAAAATATTTCAAAATCAAATTTAAAAATTCAAATTTTG
ACTTATTCTTTGGCTGTTTAGGCCAAACAATATAGCTATAACATTGCGACGCACGGGACG
TATCAGTACTGGTATCAAACAAGCTTTTCTAATTTTGTAACTGATCTTTTACTATAGTAG
TTTCCAGCGATCAAATGCAAATAGCCCTCGAAAAGAAAGCAGAGACAAAACATAATAATC
ACTCAGAAAACCCATCCGGAGAGGACGAACTTGCAAACACAGAACTGTATGCCTACCCAC
GTACTCCTACGGTCCTACCTACTACCGTCAACTTGAGATTTTCTCCCTGAGAAAAACTGA
TTTTACCGATTCCCCCCACGCACAACGCACGAACCTTCTCAGCTCTCACCGGTGGATAGA
TAGATGATACTCCTCGCCTCGCCGCTTGCCTCCCCCATTGCGCTCCCACCGGCGGCCGGA
GTCGTCTCCCAATCCGACCCAAGGTGGGGACCACCCTCCTGCTCGGTGGGCCCGAGCAGC
CCGGCCAAGTGGCCGCCGAAACCCGCTATAAATCCCCCACGCTCCACCAGCCTCCGATTC
>Os08g0364900|Os08g0364900	Os08g0364900; upstream from -3000 to -1; size: 3000; feature type:gene; location: Oryza_sativa.IRGSP-1.0.46:8:16889349:16892348:D
GGGATTATAAGTTAATAATTACTCCCTCCGTCCCAAAATATAAAAATCTAGTACTGGATA
GGATATTTCCTAGTACAACGAATCTGGTATTAGGAAATGTCCCATCATATTATAGGTTCT
TATATTTTGGGATGGAGGGAGTAGATAATTTGGTTGTGTTCTAGTATCAAGTTTTCAACC
TCTGTTTTTTTTTCACGTGTATGCTTCCCGAACTGCTAAATGGTGTGTATATTTTTAAAA
ATCCATAAGAAAGTTGCTGTAAAAAAATCATATTAATCTATTTTTTAAAAATAACATACT
TATTTAATCATATGTTAATAATCGATCCCGTTTTCCATACGCAGGTTCTCAAACTCTTCT
ACCGAAAAAGCCTTAGTACATATTGTACACTTCGATAATTCTTGCTCACCACTATATGTA
TATATATGTGACTGTTAGAAACTTAGAATAATTAGTGACGCCACACAGGTAGTTGCCGTA
GTGGAGCGGATGTGAATTGTATTATCCGTGCGGATGAAAAAGGAAGCATTGAAGCAAGAT
GATGGCCAGCAGAACCGGTTGGTTTATTTGCCACGTAGGACGATCTGTCTGACACCACTT
GCAAGTGTGTGTGACGTGCAGCCTTCCACAAACGTACAGTGCCAGCAGCTAGCAAACAAG
TAACCAAGGAACACTGAGACCCGGCTGTTCACACTAGCTGGCTCGGTCACTATAAAACTT
ACTCCTATATCGCACGTGCGAGCTAGCTATTTGTTGCTTCTTTTTTTTTTTTGCTTCGAT
CGACATGGTAGATCGAGGTAGCGCTGGATTCAATTTTATTATCGAAAAAAAACTAGCTTC
ATTCTGAGTACGCACCATATATATATATTTCAAATACACCTACTCACACGCGCGCACATC
CATATAAGTATGTCATAACACACGTCTAAATAAGATTAAAGACCTGATATCATGTACTCC
CTCTATATTAAAAAAAAACTTTATTATGTCGAGATTCAAACCTAGAATTAGATTTTTTTT
CGGACGGAAGAAGTAGCACACAAGCATGCACGCGCTTTAATGGTTGAACATACTACCATA
TCTCAAAATGTACAAATTTATTCTACTCACTCCATTTCTACATATGATTATTTCTGAGTT
GTTTAAAAAAATATAAACATTTATATATTGTTTTATTTTTTTTCCTCTTCAGCTATCTTA
TTGGTTAATTTTTAAATCGCTTGCATTTCACTCCAACCATTTGATATGTTGGAATGCTTA
GATTTCCATGTGATGGATTTAGTATTAAAAAATGTTTATATTTTGTACAAAATTTGAATA
CTTTAAATGTTTAGATTTCCATGTATTGGAATTAGTATAAAAAATCCTTATATTGTGTAA
AAATTGGAGTACCTGGATTTAAACTCTGAAAGAAAATACGAGCAGCCTGTCGAGCAGATA
TCATACGTTTAATCGATCTGATGTCTGAAAGGAAAATACGAGCAACGTCGTAACTCGTAC
GTGTATAGCCGGGCAGATGCTGGTGGACATGTTCCATATATAAAAGAAAAGACTCCAGCT
ATCTTAAAAAGTACTCCCTCGTAAAGGAAATCGTTTAGGATAATGTTTAAGTCAAACCTT
GAAAATATAAATTATGAATAACTCTTAAGTTGTTGAGTTTGAAAATGTAAAAATTATGTG
AATAGATTTGTCTTGAAAAATACTTTCATAAAAGTATACATATATCACTTTTCAATAAAT
TTTTTTATAGAAACAAGAAGTCAAAGTTGTGTTTTGTAGACCATGTCGCTGTCCAAAACG
GCTTCCTTTATGAGTATGGAGGGAGTATGCTAACTACTCTCGTTTTGGTTTCATATCGTT
TTGGTTTCATATTTCAAGACGGTTTGATTTTCTTTGTTTCATCAAGTACATAAAAAAAAA
TCTAATAACTGAATAATTTAATTCTGACAGTAGGTTTGTTTTGCGTTGGAAATGTTACAA
TGTTTTTCTATAAACTTGATTAATTTTTTTAGAAAACAACCTAAAACGGGGAAGAGAGTA
TGTCGTTAGTTTTCTCTATACTTCTGTAAAATCAAAGTGTTTTTCATTGTTATTCTATGA
TGAACAATTGGCATTGAAGATTATTGGTTTTGATATTTGAAGATTATTGGCAAAGTGATT
TTGGAGATGATTGATTTTCAGGTGATGAACAGGGTTACTGTTTTTATCGGGACCGGGATG
AACAGGGTTACTGTTGGACCGGTCAGACCGGCGGAACAACGGCGGTCAGACCGGCGACAG
CAACAGGAGGCGGCGACAGGTTTTGGTGATTAGACCGGTGATCTATACCGGTCAGACCGA
TAGCTTCTAGACAGTCAGACCGGCGCTTCACCTTCGGTCGGACCATGATCCGTCGAATTT
GAGAGTAACTTTTAATTTCGCAAAAAGTTTAGGTTTTGGGTATACCAACCATTCACACCT
CCCTCTGGTTAACTTAGTTATTGTGTTTCGATCCAACGAGTTCCTCTCCTCCACACATGT
GAGTTACATAAATCCTTTTATGACAAACCCATGTCAACAACCTTCATTGTAAGAAATGGC
TGTTGAGGGAGACATGAGATATATTCTAAAAAAAATGAAAGAAAAATAAAAAAAAGAAAG
AAAGGAAGGGAGACATCAGACATGAGATGCCCAGGTGGATTAGGGTCGGCCGGCGGCCGT
GATCGACCAACAACGGCATGCATGCATGCAAGGGGTGACGTCATGACGAGATACGGAGGG
TGGGGATCCACGGCGGGCCGCCCCCGTTCACACTATCGCCATTTACTAATCCGCATAGGG
TTGGCGGTGGGCCCACCCTCCCCGCCTTAGCGTTCACACCTGTTCCTTTCCCGCGCTTCG
GATTCGTAGTTTTTTTATATAAAAAAAAAGAATAGAAATGTTGGAGCTGTGCTGAACTAG
TCGTCGTCTTCGTCGGGCTAGCTAGCGTATATAAGAGTCGACGAGGGCGAGCGAATTCAT
>Os03g0849800|Os03g0849800	Os03g0849800; upstream from -3000 to -1; size: 3000; feature type:gene; location: Oryza_sativa.IRGSP-1.0.46:3:35750369:35753368:D
ACACAGGCACATTACCTGCTCCTGCTGCTGATTTGATCCGTTCATTTGGTTTAAACATCC
ACAGGGCATTCTCTGAAAAATAGTTCTCCTGCCTAGTCTGAAAACCCATATATATAACTG
ATAGGTTCATGCATGTTTGGTGCTATACATGCTTTAATTATGCACGCTTCACCTGCAATA
ATTGTCATCCTAGCGAGTTGAGTTTGGCCTAATACAGCAATAGCAATGGCATCATGCACC
TAAACAGCAACCTCTCCACTGTCGTCGTCTCTCCGTGTGAGGTCCCCTGCAAAGCCGGTT
ACCTGATACTCCTTTTCATATAGCTATGCAGAGCTGGTTTACTCTTAAACAGCAAGATTT
CCCAATATTATACTCGCTACACAAATGCAGAGCCTCCAACTGTCCTAAGTTTTGGCAAGC
CACTGCATTTTGTTCTTGAGAAGCCATGTGCAAACGGCTACATATACCATCTGTACTGTT
GTGCACATCATATCTTCTTTTTTTTCTCTTCCTTTTTTTCATTTGGGTGCATGTTAGCTC
GTATCGTAGCAAGTAGCTAGATATGAATAGATTAATTCTTGTTCATGTCGCAATCATGGA
TTCGTTAAAACTGAACCTCTTAGTTCCTTTATTCAGTAGTATATATCAATATATAATGCT
GTCTGATTACCTGTATAATATTATATGTGCAGACCAGACTACAGAATCCAACTAATAACT
ATAGTCAAGTTGCCAGCCTTATATCTGCTTGCACGTTTGAGGTCAATCCAAGAAACTTCC
AACACAGTAATCGTCCTAACATCTGTCGTTCTAATCAAATTAACTCTGCCAACTTGCCAT
AAACCTAGGAGCATATATAATATCATCAACTACATAAGAATGGCTAGCAAAATGCAGCAT
TTCCAGCGTGATTTACGGTGTTGTTCTTCCTCAAGACTGGTAAACAGACAGTTTGGTGCT
AATGTTATGATTCAACCAACAACAGGAAAGGCAAAAATGTGTACATGGCTGCGCCTAAGG
TTTGGCAAGCAGCTTGTATCTGGTGATTATTAAGACAAAATACCGGATAAATAATAATCA
ACCCGGCCAGTCTTTATATGGTTAGGCAAAACAATCAGTCAGCTAGGCCATTCTATTAGA
CATTTCGGCTCATGAATCATGATCGGGACAGGAACCCGACCTGATTAGTTAACAGAATAT
GTGTTGCATATGCTGCTAACTTCCATGGAAATATGCACGTTTTTGTACATGTTGTTTTCC
CTGACCCAAAATGATTAGAATAAGATAGTTAGTCAAAGATGTATTTAGGCCTTCAATAGA
GACGTCTGTCTATAGGAAAATGGATGAATAATGTTTTTAGATAATTAATAATAGGCAGTG
TAAACAAGTTTATTCACCCGCCCGTGTGGAGAGTTAATTTACTGCAATACTGCATAGTAT
ATGTTTCCACCTAAAAATAGTTCCTCCGGCATTGGCTTTTTCAGCAGTTGAGAAGAACAC
TTGCACTGTTGCACATAGACTGATCTGACAGAAACACACAAAAGTATATAGCACTGTATC
GGCCAAAGCTATTGATGGATGGTAGTTTGCACCCAAGAGCATGCAAGATTGCAAAAGCAG
AGTGAAAGCTAGGTAAAAAAAAAAAACAATCCTTCTGTTGTGCTTCAGATTAGCAGTGCT
AGTACCAAATCGCTGCACCGACAAATCGCCATCAGATTACTTGTTCAGTTATAGTTCAAA
GCTTAGTCTTGCATGCAATCCCGAAATTGGCGGCAGAATGACAGGCTCACGCTACCCTTT
ATTTAGATGCCTACTTCTCCAATTTGTTTATATACCGAGAATGACAGAAGTTGGTGCTTA
CTTGCTTACCTCAAAATGACAAGCTAGATACACGAAAAACTACAAAAGAATACGCTGCAG
ACAGTTCAATTTAACTCTGAACAAGGAACCTATTTTGTCAAGAAAAGAGGCAGGCTGAGT
TTTTCTGAACTTTTTCTGAAGATGCAAGTAGCGAAAGATGGAGTTGACGATGAGATAGCA
GAGCTAGTAGGTAAGGTTTGCTCATCGATGGCAACAGCGGCATGAGCTTTGCTGCGACTT
ACACATGAGCAAACCTAACACGGCAAGTGCAGCATCATACTAGTAGCATATAGGGTGTGG
TGGCCATCAGATGGCGTCTGACCTAGCTAGCTAGAAGTCGCTAATAGCACCTTAGTCATT
TCCTTCCGGTAGAGAAAAAATCTTCACCAAATTAATAATTAATCAACTCTAACAGTTGCA
GGTCGAAATTACCATCATTTTCTTCTACATGCGGCGATAGACCGATAGTGAATGTTTGTT
CGTTTTGTAAGACTCAGCACGCGAATGATTGGCGGTGTTTACCATACAGCATGAAGCCGT
TTGTACGCAACAATACTTTTTTTGACATAAATAAGCAACAATATTCAAAGCATGAAACCG
TTTTGTACTCAAATTAGCAACAGTATCCAACGTTTGATTGTGCAGTTCTTTTCTTCATGT
CGAACCTTATTTTCCTACACAGTACGAGGGAAATTCAGAAATATTGTTTCTCCCCCATGT
GAGCAAACAGAATAAAACCAACCAGCCGTCTGCAACACTAAAAAAATCACCTCCAAAGAC
GCGTACACAATGTCATGTACAGGTAAGTAGCATAGAAAAATTCAGTTATTGCAGGGATGC
AGGGAGAGAATTCAGAAATCAGAATAATACCCCGGATCGGGTTTATTACGTCCATCTCAA
CAGTTCAACGCATCAGGTCCAGTCTACGCCTAAACAAACGCGAACCTACAGGCAGACAGG
GTCGGCACCAACAACCCAACCCATCCTGAGTTCCTGACAGCCAAACCTCGACCTCCAGCT
CCAGCAGCTAGCAAATCAAAGCAAAGCAACCGTGTGTTGCGACTTTGAAACCTGTCACGC
TGAAGCAAGAGGCACGCATCACACTACAAGTTGTCATCACACCAGCAAAGCCAAAACTAC
>Os01g0227800|Os01g0227800	Os01g0227800; upstream from -3000 to -1; size: 3000; feature type:gene; location: Oryza_sativa.IRGSP-1.0.46:1:7068481:7071480:D
AGATGTTATTTCCTGAATTGAGTAAGATAATGACTACATATAACTCGCAAGCTGCTGCGA
AACAATGGTTAAGTTTCACCCTAACCATAGAAATAAGTTGTTCTCTTTATATATATTTAG
ATTAAAAAATATTAAAAATTTTGGTCAAAATAATATCATATCAGATGGTCGAAATTTTCA
ACTGGAATTTCTAACCCTGAGCGCGGTACCCAAGCGCCGTCGCGGACGAGGCACCGGTGT
GATGCGGCCTGCAATCTATAGCCACACGTGGTCCCGCGGATTGGTCGTGTGTTGGCCTGG
TGGCACCCAATTTATTTAATTTTGTCGCAATGAACAAGAAAATTGATGCGACACGTATAA
AAATCAAGATTTAATTAAGAAATCTACATCGAATTCATCGATCGAGCTTAACTATATGAA
TCTATACCTAACAAATGAAGAATGTTTGGACCGGTGGCTCCATTCACTGAATAAAATTAA
ACTTTATTCAACCTGATCACTAAGCTAGTTTCTTCTCCTTCCCTCCTCCTCTCTTCAATT
ACTTTTCTCCTCAATTATTTACCTGATCTACAATCTGATCACACTATTATATTCGTTGTA
ATTAAATCTTTACAACAAGATATCGTATAACTATATTATGATAAAACTAGATGTTTCATT
ACGTGATAGTAACATGTTTACATGTGTATTTTCACTGTGTTTCACAAAACTCACCCCTAT
TCTCCCTCCACTCCATCCTGCATGTATTTAACGATCTTCAAAACGATTTTTCTTCTAAAT
TACTTATCCGATTACATCGTTATATTTGTTATAATTAAATATTTATAACAAGTATCGCAT
GTTTAAATTCTAATGAAAAAACATATATTTCAATCCGTTAACACTCGATGTGTCATACTG
TCATGGTTACAGATAAGACATACCTCATATCCTATGACTTATGGAATATACGGATATGGT
ATACCTTCGAGTATATGATATGTTTCCGTATATGATAATAAAACTAACAAGAGATTATGG
AAATTATTCTCACAGGCAAGTGAATATCAGAGTCCTACTTGGAGAAGATAAGGTTTATAT
TATATCATGTGGGGACCATAGTCTCCGAGTTCTACTTGGAGACTTAGTTGATTCACGGTA
TAAAAGGCACACCCCCTGAGGGGTTTAGATCATCGAATCATACTGCCAACACAACCACCA
TAGCCTACTTGCGGGACTTCTCGTCGAGACCATCTCGACAAGGGATCTCGCCGGTAATCT
CGGGATCGTCGGTTCTCTATTTGTAATCTATGGTCTTTCCATATCAATCTTATATAAATT
GGATTAGGGCTATTACCTTATGAGGGGTCTGAACCAGTATAATCCTTGTCTTCTTGTTTG
CTTGATGTCGATCATGTATATCCTCGTACCAACGTATCCCAATACCCTATTCATCCAGTT
TACAGGTATCCCCCGTCGACACATACGTGATAGCAACATGTTTCAACGTGTGCCTTTATT
ATGTTTCACAAAAGTTTTCAATGATTCAGTGACTTTATTTGTTTTCCACCATGTGTAACT
TAATTTTTACCGTGGTCAACTGAAACATTTGGATCATTTGATTTATTTAGAACAATCGAG
CGCCAGATTTGAAGTTTTCTCCCTAATAAATCTATGGAAGAAAGCAACCACGCTAGTTAA
TTAGCTGGACGAAAAGTGACCACGCTATTTAATCGCCATCGATCCGTCTGCCATTCGGCG
TGACCAATTTGCGCGACTGCGTCGGTTCCACGTCCCCGATCCACGAGCGGTCACGTGTGA
TGGCATCGCACCACCATCTCTTCCATTTGTCTCACGTCTTCGAGGGTGACGACTCCCTCG
TCCCTCGCGCTCCCTAGCCCGCGAGGTATGCATATTTGCACAAACAAATTTAAAACATGT
ACTCTCTCCGTTCGAAAATACTCCCTTCTTTCCAAAATATAAAGTATAACCACTCCTAAC
TCAAAGACCAAGAAAATAATTATTATCATCTTGTAGTTTGGATCATCCTAATAAATACTC
CCTCCATACTCATAAAGGAAGTCGTTTAAGATAATGTTTAAGTCAAACCTTGGGAATATA
AATCATGAATAACTCTCAAGTTGTTGAGTTTTGAAAATGTAAAAATTATATGTATAGATT
TGTTTTGAAAAATACTTTCATAAAAGTTTACATATATTACTTTTTAATAAATATTTTTAT
AGAAATAAGAAGTCAAAGTTGTGTTTTAGAGACCGTGTCGCTGTCCTAAACGACTTCCTT
TACAAGTATGGAGGGAGTGAGAATAGAATTAGAGAACATGAGAGTGGAGGATTTAAAAAA
GTAATAATTTAATGAAGAAGTGATCATAGTTAATGGCCTACATGCATGTATGCCTTATAT
TATAGAACATCTAAAAAAAGTGGTTGTGCATTATATTATGGAATGGAGGGAGTACTTATC
ATTCTATATATTTTAGCATAGGTTAAAATTTAAGGAAAAAATAATAGTTCCATTCATTTA
TAAATGATGTATAGTTAGGATTGGAGTGGTACTTGAAGGCCCGGGTGGAGATAGGAGTAG
AGCAGGTAGAGCTGTAGCCGATCCTAAATATTCATTGAAATTTCATTTTAAACCTTCAAA
AAATTAGAAGATAAAGGCAAAATTTTATTAATTCAATTAAGGTCCAGAAAAATTATGGCT
CTACCACTAGCACTACTTGAAGGGTATAATAGAGAAAATTTTCTGGATGGGAGTATGGGA
CCTATAGTACTTTAGAGATATGGCGGTAGTATATATAGTACGTGTACAACATCGTGAGAG
ATGAGTTATATTTAAAAACGAAAAATTCCTCAACATTATCACTTGTCCCTTGCTCCCATT
CACCACCAGAAAATATACTTTTCGTGAGGGGCCGTCACCGTCAGCCCGTCCAGTTTCTGG
TTGTTGATTTGCTACCCTTCCTTCCGTCCTCAACATTATCAATAGTCCCATGCTGCTGCC
>Os04g0496000|Os04g0496000	Os04g0496000; upstream from -3000 to -1; size: 3000; feature type:gene; location: Oryza_sativa.IRGSP-1.0.46:4:24811142:24814141:R
GCATTCAAAGACTTAAATGAATAGGTAAATTAAATGTTTAACCAGAAACTAATGAGCCAT
CTTAATACTCATTGGTTGCATGAGTGCTTACACTACTTGATCTTTGTTATATGTTAGATA
GTTAATTTGTGTTTGGTCTTGGTGAGAAAAGTAATACGGAGTAGTGTAATTTTTGTGGAA
GGATAGAGTATGAAATATAGGGAGTATTAAAAAGCTCATGATAACGTGCCGCTGCCCGCT
GATTGGCTCTGGCTGCAGCACTTTTGACTATCTAGGTGGAGTAACAACTTACAATCTTGT
TGGCTGGTCTTGTTCTTAATTCTGCAAGCTGTTTAATTTTCTTCAAGTCAAATCCGTCCA
TTGGTTAATCCGTATTGCCACTTTGTTACAAGTCGGATATCTCTCCCTTTCATTCGTTCA
AAGTTCAAACCCATACTTGCAGAGGCGTTGGAAGCCATAGCTCCCGGCCTGTGTTTATAT
ATGCTTGGAGCTGCTCCTGTGTAATGCGTAATTTACTGAACTGGAGTATGTTACTGCTTA
CGGCCAGTCTTAACGACAGCTGCCAGAACAGAAGAACAAAAACAAACACATGATCTTCAG
GCTGTGCAAACCGAGCTAGGCAGATTGGGGCATTGGGCCATGGTCAAGCTAGGTGACCTG
TAATCTACCAAAATGGTGATCCATACTCCTTACCTGAATACAATGATGGCGTGGTTTATT
CATGTTGAGCTGGCACTTTCAGATAACGGGTGTTAAGTTTGATCTAATCGATCTCCATCT
GTTTGTTGGCACATCCATACCATCAAGTAATCTAACTGACATTAAGAGGGTAGCTTTTGT
AGAGTACGATGAGGCCTGAGACTTTGTGGAGTGATAGGCATAGTACACCACATTTTTTAG
ATAATGAAAATGGATTACATCTCCGGTCTCTGCCCGTGGGCACACAACCAAAAAGTCTCT
GAAGTAAACAGAAAAGAAATTAAAAAAAAAAGCGTGATACGACAAACCCTTAACTTATGT
CAATAAGATGATCTACATATAGTGACCAAGTGCGGTTTAGTGGAGTACATTTCCAGCCTC
CTAACATTATAGCTGCAATAAAAGGGAGTTGTTACTATCTGAAACCAGTTCGTTCAGTAG
CTCCACTCTAATCCATGATGACTTGCTTTTTTCTGCGATGATGAAATGAATTGTATCTGC
ACATTTTGTTGATGTAGGTGAACAATGCAGCAGTTTCATTCAATGAAATTGACACTAACT
CAGTGGAGCACGCCGAGACGGTCCTTAGAACGAACTTCTATGGGGCCAAGATGCTGACTG
AAGCACTCCTGCCACTTTTCCGGCGATCACCAGCCACCAGCCGAATACTGAATATCAGCT
CCCAACTTGGACTACTCAATGTAAGTGCTCAAATGGATATTTATAATTCATGTTAATCTA
GTATTGCTTCCCTGTCCATATATCTCGTCACACCCAAAATTATAGAACTAGTGGATGAAC
TTGTTTGAAACTCTCCTGAAAAAAAAAAATCTAAGATGGAACACGCAACTATTTTACCTT
CATTGTTGTGTACCTCATAGATCATCGATAGATAACAAGACAAGGAAAATAAATGATGAT
ATTTTCATGAGGAAAATAATATTTGTTGCTTGTCGTATTGAAAGATTTTTTTTCTTTTTA
ATAAAGACTAGCCTCTAATTTGTTTTTAATAAAGAATAGCTGGTTGTAGCTCAAATTGTT
AGGAAAAAAAATTCCATAGTGGTCTCCTTGTACATCATGAGTCACGTTAAGTGTATGTGC
GTTGAAACTTTGAGCCTGTAATTAACTAATTCTCTTTAAGTATAGTGTCACTGACCTAAC
CGTTTTTGGATTAAATCAAACTATGTTTTAAAACAACAGTAGTTTTGACATATCAAGAGG
CAAGCTTGACAAGTAGTAGCACACAAATAGCTAGTAGATAAAGACTTGAGATTATGAAGT
GTGAATGCACGAGACCAGTGGTGGACAAATTATAATTTGAAGCTTATCTTAAGGCATAAT
GCATATCTCATCATGAATGTGCTGGCTAATACGTTGTCTATGGTCTGTACAAATACACGG
CCAAATACATGTCATTTTGAAGTCTTTTCTTTCATTATCACTGACACAGCATAAACTAGA
ATCCGCAACTTGTTTGTTTTCTAGCTAAACTCCAAGTTTACAGAAGTTCTTCCGTCTAAT
TTACTCCCAACTACATTTGGAGTGTTGAGCAGAAGTTGAAAGATGATCTTTATATGCAAG
TTTGAAAATCACGTACTATCATGCGCAATTTATGTTTCTTGCACAGAGACGAACCCTTAA
AATTTTCCAGTTATAAATGGTTGTATAGGTTGTAAAACTAAGCTTGCGTCGCTTTCGTCG
TCACATGCATATGCTATTAGTATATAACTAAAGCTGGAGAGATCTTCTCTCACAAAAGAT
CTGTATACATGGGCCATAAAGTTAAAAAACACGAAAGGGGACGAGGATAAGAGGTTTGAA
AGCAACGGGAAAAGAGCGAGGAATCTATTGACTCTTATTTTCTGACTCTTATTTTCTCAG
TATTCCCTCCATTTCATATTATAAATCGTTTTGATTTTTTTTTCCTAGTCAATTTTTTAA
AAATCTGATCAAATTGATAGAAAAATTTAGCAACGTCTATAACACTAAATTAGTTTTTAT
CGAAACTAATATTTAATATATTTTGATAGTGTGTTTGTTTCATGTTGAAAATGCTATTAT
ATTTTTTTTATAAACTTGATCAAACTTAAATGAGTTTGACTAGAAAAAAAATAAAATAAT
TTATAATATGAAACAGAGGGAGTAGTTTACAGCGACGAGAAACAGAGGGAGTAGTTTACA
GCGACGAAAGTTGGTTAAACTTACAGCAGGGCATCAGCAAGTCAGCATCTGTAGTGCATC
AGCAAGTCAGCATCTGTAGTGCAACGGCATCATTAAACGCAGAATGTGTACACGACGACT
>Os05g0186300|OscytME2	Os05g0186300; upstream from -3000 to -1; size: 3000; feature type:gene; location: Oryza_sativa.IRGSP-1.0.46:5:5297418:5300417:R
TATTCAGTGCTTTAAAAAAAGAATTCAAGGTATTTTGTGATTTCTAGAAATTCCGAGAAA
ATTTCCGTAAAGTTTCCGACCGATTCCGAGTTCCGACGGAAACTGCCATTATCATTTTCG
ATTGTGTTTCCGAGAAAATATTTCCGAATCTGTTTCCGTTTCCAAAAATTTCCGAAAAAA
TTTCGACCGATAAATTCTGTTTTCGAAAATAGATCCGGAATCCAGAAAGTTTCCATACCG
TTTTCAACCCTAGTATACACTGACCAAGAGTCCGTAATAATCTGTTGGTTGGTGTACTAT
ACACGTTTTCAGTGACCACCATGTATAACAGACAATTAAAAGTAAGCAACGACTCCGGAG
ATGCGGCGAACGAACAAAGGCATTTTGGTCTCAAAGCCTTGCACTTTTGGAGAAAAGATA
CGAGTAAACAAGTCTGATCGAATTGGGTTTGTAGTTTGACCATGCCTGGGGCTAATAGTA
GCTGCCAGGTACCCTGTGGACCATTGAAAAGTCAACGTTGAAGTTGAATTCTAGTGTGAA
ACCTGAATATGCCCTAAAATAGTAAAAACTCTGAAACTTGACTGGTTGCCAGGACGGTGA
GCTAGGGCATGGTTAGTTCGTGAAAAGAAATTTTTTGAGTGTCACATCATATATTTAATC
GGACGTTGGATGGAATTTTTAGATACGAATAAAAAAACTAATTTCATAACTCGTCTGAAA
ACCGCGAGACGAATCTTTTGAGCCTAATTAATCCGTCATTAGCACATGTGGATTACTGTA
GTACTTATGGCTAATTATGGACTAATTAAGCTCAAAAGATTTGTTTCACGATTTTCCCTC
TAATTATGCAATTAGTTTTTTTAATATATATTTAATGCTCCATTTGTGTATTCAAAGATT
CGATGTGATGTTTTTTAAAAAAAAATAGAGAAATAAACAGGCCTTAGCCGGCGTCCCGCG
AATGGACGAAGAATCAATGGCATGTTATACGGTCGAGATACATTGACAAGTGGTATGTTT
GTTTTAATTTCGAGATCCCGTGCTTATAATTTATTTTTAAAACTTGTTTGGAGGGACTTC
TCTTCCTCTTCCTTTGAATTTCGTTTTTTTTTTTTCATGATGAACTGTCCGTACATCGCC
GATCCTTTGACGACATTCCTCGTATGCAGGCAGGGTATGCTGACGTGGCTGGTCGGCCCA
TGTGCTCCCGCGAAAACAGACCGACTTTAGACGGACTAACACTTTTAAGCCCCTATCACA
TCGAATGTTTGGATACTAATTATAAATATTAAACGTAGACTATTAATAAAACCCATCCAT
AATCTTGTACTAATTTGCGAGATGAATCTATTGAGCCTAATTAATCCATGATTAGCCTAT
GTGATGCTACGGTAAACATTCTCTAATTATGGATTAATTAGGCTTAAAAAATTTGTCTCA
CGAATTAGTTTTCATTTATATAATTAATTTTGTAAGTAGTCTATATTTAATACTCTAAAT
TAGTGTCTAAATGTAGGGACTAAAGTTAAGTCTCTGGATCCAAACACCACCTGAACCAAA
CCTACGTGCGATAAAGGGGTTGTTTAGATGCAGGGAGTAAAGTTTTAGCGTGTCACATCG
GATATTATATAAGGTGTAGCATAGGGTGTTCGGGTATTAGTAAAAAAACTAATTACAGCA
TCCGTCAGTAAGCCGTGAAACAAATTTATTAAGCATAATTAATCCATCATTAGTAAATGT
TTACTGTAGCACCATATTGTCAAATTATGGAGCAATTAGGATTAAAAGATTCGTCTCGCA
AATTAGTCGCAATCTGTGCAACTAGTTATTTTTTAAGCATATATTTAATGCTTTATACAG
GTGTTCAAATGTTCGATGATGAAAAAATTTATGGTGTAATCTAAACAGGCCGTAGTACTC
AAAATGCAGGCACGTAAAAGCCAGCTGCGAAGGACCCGGTGCAGTTTATTTAAAGTTTCA
AATATACTTATATCTTTAATTGTTTATGATGGATAGAAACACTATATAAAGGATAGATGT
CCACAACACGTGTATAATTATCTCTATAAACACACATTTAATTTTTATGAGTAGATATGA
TTAGATAAGCATATTTTAAAATTGACGAAATTATCACGGGTTATCAACATTGATAAGTAC
TACATCCATAAGAAAAATACGCCATCAAATCTAACTTAGGCTGCGTTCGTTTGGAGAACA
AAGGGAGTTTGTTTGTTTCGTTTTTCGCGCGCACGCTTCCTAAACTACTTAACGGTGCGT
TTTTTGCAAAAATTTTCTATATAAAAGTTGCTTTAAAAAATCATATTAATTCATTTTTAA
AGTTTAAAATAGTTAATACTCAATTAATCATGTGCTAATGGCTCACCTCGTTTTACGTAT
CTTCCCACTTTTCTCAATCCCCTATCTTTCAAACACAGCCTTATAATCGGATGGGTTAGT
TCCACACTTCCACTAAATGAAAACCTAAACCAGCTACACTCTTTTTATTGTTTTTCTACC
AATGCTGCTACTACACATACAATTTTATTTCACTTTTATAATAAGCAATAAAAAATAGAA
AAGGGAAATGGTGGGGTCGCACCGTTCCAGGTACGGAGCCACAGGCAAACGGGTAAGCCC
GAAAACCAGGTGCAAAACCAATCACCCCCACCATTGCACCATCCACCGGTACCCACCCGT
GCACTTGCCCGCCCATCGCAAAAACAACAGACGCACATACCCCCGCCGCCGGTTCGCCGC
TCGCCGGCGACGGCCGCCACGACGACGACTCGTCTTCCGTCACCTACCTCCGCTTTCCCA
CTATTCAATCCCCTCCCGTTTCCCACCACCTTCCCCCCTTTCGCTCCATGGGAAAACCAC
CCGTCCTACGAATTAAATGCCACCACCCGCGCGACTCCTCCGACCCGACGTTTCCTCCCT
TTCACACGCGGGCCCCCACCTTCTCTCTATAAATACCCCGTCTCCTCTCCTCCTCGCCGC
>Os08g0141400|Os08g0141400	Os08g0141400; upstream from -3000 to -1; size: 3000; feature type:gene; location: Oryza_sativa.IRGSP-1.0.46:8:2315262:2318261:R
AAAAATTAAAACAAATCATGTGAGATCCACGTATAAGTGGCCACCCCATCTTCTTCCTCT
ACTTTCTCTCTCCTCTCTTCCCCTTGTCTCATCCATGCCAACCGCAAAGCCGTCCGTCCA
TTCACTTTAATTTACTCGTCTGTTCGTCGTAACAGACGGTGTCGTTTTCTCGGCGTACGA
GACGCGTACGTACGTGTAGGACCGGACGTGGCACCGACAAGTAACATCCATTGGTGCTGG
CATATATTCTGCCATGTGACACACGACGAAAGAGCGGAAGATGGTGCTGCTGGTGCTGGT
CAAGTCATCAGGTCAGCTCCGTCCGCCCTGGCCGGCGCCGGGTAACGCAATGCAACTCAA
GAGAGCTACACCATCCGTGTCCTACTGGAATAAAGTTACATCGAAGTTCATAAAAAGTAG
AAAGTAATTAATTACGTGTAAAATTGATAAAGTGAAAAATAATTATATTAGATCTAATAA
AGTGGGGTATTCTAGTTTATAAAAAAAAATTATGAAGAAAACAAACTTATTTTGGGATAG
AGGGAGAACTAGTTAGGGTGCGTACAATAGAGACCACGGGTACCAGTGGTCTCAGCATGC
CATATTGGAAGAACTGTACAAATGTCATACTACCCACAGTGCAAACCACTCCAAAACATT
TGTACGTTTCAGCCCCTAACTATTTATATACCTGCTCTTACGGTATATCTTACTGTCAAG
CTTATATCGTACCCTAAAGCAACAAAAAGAATTACAAATATGCCACTAAGCACAACACAA
ACCTATTGTCAGCCACCACCCTCTCTTTTTTTATTTCCCCCTCGATCCCCTTCCCCCCTC
TCTCCTAATCCCCAATTCTTCATGCCGCCACCGACACCTCCGTTGTTCGTCCACGCCTCC
TCCTCGACGAGATCCCTCTCCTCTGATTCACCGCGAGCTCGGCGGATCCAGAGTGAGCTC
CATTTCCCTTTCCGCCGACGAGAGGGGACCATGACGGGAGTGAGGATAGTGATCCTTCTC
CACCGATGAGAGGGGCCACTGCAGCGGTGAGGATGACGAGCTCTTCTTCATCGCGCGGAT
CTGGATTGCAAACTCGCCGGATCTACAATTGCGGGGAGCAGTGACAGCCTTAGGGAGCAG
GTTGGCCGGTTATGAGCTCCGCGCGGTGAAGGGGCGACAAGTACCATGGTGAATGCGCTC
CTCAACAACGCATGGCGGTGGTCGATTTCCAGGTGCACCCGCCTTTTCTTCTTCCACTCT
CTTTTCCCCCTCCCGGACCACCTTTTCTTATCGAAGCCATTGTTTCCTCTCCAAACTTGC
CCAATGCGTGGCTCCGAGCAGTGGCGCCACAATCCTTGAGCTAAGGGGTATCGAGACCAC
TACGACCTCTACAAGCACGGCTAGGCGTCACGAGGCCTTGGTCCCCCACTGCCAAGAAAG
CTCGGCTCTAGTGTGAATGCTTGAGACCACTGTTCGTTATGGTGCTTTGCGCCTGATCTT
AGTTTGCTGTCGGCGGACGTCAAAATTGATGGTTCCTATCGGTTACCTGTGTTGATTACA
AGCGTAACGGCTTGAGATAAAAAGTAATTTATTCATACAACTTTTAATATAGGTTGTTAG
TGACTCAAAAGCAATCAAGTTGAAAAATTAAAATTGAAGGCTCAAGTTTAAGTAACAGCT
TAAAGCAAACGATAGGATATCCGTTGTGTGCATAGGATTCGGCGGTTGGTCTTTCTTCTA
GATCTCTCCGCCAAATGCTGTTCTTCTTGCGCAGCAAGTCATGCCCGCCCGGCGCCACCC
ACTCTCATCAGTTTTTAAAATGATTCTTAGTCTGTGGCTCTGTGCCTTCGCTTTATTAGC
ATGCTGACCACGTGTGCCAACGCCAAACCCTCCTCCTCTCCTCTTTCGCCGGAACAAACG
AGAAAGCAGCCAGCCAGCCTCCTTTGACCGGGGGGAGCCTTTGATCTGGAGTGGGGCCCC
ACTCACCAGCCTCACCACCGCCACGCCGCCAACCTACAAAATCAAAGAAAATAAATAACG
TGCTCCATTTTAGTACTCTCTTCGTCCCATAATATAATAGATTTTGAGTTTTTATTTACA
CAGTTTGACCACTCGTCTTATTAAAAAAATTTAGAATTATTATTTATTTTTTTGACATAC
TTTATTATCCAAATTACTTTAAGCACAACTTTTTGTTTTTTATATTTGTATAAGTTTTTT
GAATAAGACGAGTAGTCAAACAGAGTAAGAAAAACTCAAAATTCCTTATATTATGCGACG
GAGTGAGTACTTTTTAAAATCACTAGTATTTCTCGGTATCAATCACATGTCTCCGATTAG
TCATAACTTGTTCATGAGAATCACTATAGTACATGTACTCCGTTTTCTTTATTTTTTTCC
CAGAGTTCAAAAGATATAAATGAGGTTTCTATATTCCTTGCAAAGATACATATTCTGTCT
CAGTTTCTATTAGCATGTACTAATTAGTACTATTTTATACCCCAGAATCATACTAAAACA
TTCAATATAAATGTTGTTTTAAAATATCAAATAATATTTCTTTAAGTTTGTAAGAGTTAA
AATCTCAAACTACTACTCTCTTTGTCCTAAAATATATTAAAATATATGCTATTTTAGTAT
AGTGACAAGTCAAACATTTTTAACTTTTAACTATTAGTAGCAAAATAACAAAAAAAATCA
ATCATGTTACTATATTTATAATTAAACAAACTATCATAATATACAACTCTTTTTACTTAA
AATATTTTACTTTTATAGATATTATTGATTAAATTAGTATTTCGGAGACCGTATCAAAGT
CAAAAATGCTTATATTTTAGAACGGATGGAGTAATAATCTCTCGTTTAACGTGTCCTTTA
CATAATTAGGTTCAAACATGGCCTAAAATACATAATTATTAATTTAAAGTAATTTAGTCG
TGGAACCAATAGTTTGCATTTGCAAAGCTTTTATATAGGCCTTCTTCTTCCTGGGTCTAC
>Os01g0111100|OsCYP26-2	Os01g0111100; upstream from -3000 to -1; size: 3000; feature type:gene; location: Oryza_sativa.IRGSP-1.0.46:1:587697:590696:R
ATAGTAAGTTAGCAGAAGAAGGTGCTGTTGTAGTGGGCAGGATACCTGAGGAAGGGCCTT
GGGTAGTACCAGGTGGTTGCAGCAAGGGGGGCTGCAGTTCTGACAGTTTTTGTGGCCCTG
ACGATAGAGTGGGATTCAATCCTGCATATTGGAGACCCTGGGGAACTGATAATCCTGGCT
GGAGCAAAGGAGGTTGCTGCAAATGAGGTGGAAGCCCACCAGGTGGATAATATCCCTGCC
AATACATTGGGGGAACTGAAAGGCCTGATGCATTTCCAGCAGAAGGTGGAGCAGAGGATC
CCCATGGAACACTCCCAGGTTGATATAGAGGAATATTGCTCTGAAAACTTGGCCTCTGAA
GCCCATATTGAGCTGCCTGGGAGCTGAGGTCTGGCAATACTGCACTTCCAGCAGAAGGCA
AACTTGAAGAAGCCGATGCTGGCTGAGAGTAGTGCGACTGCAGAACAGAATTGCATGAGT
TGTGCGGCTCTAAGAAGTATTTTTCAATGTTTTTGTTTCATTGCGGTACCTGTATTATGG
CAGGATCATTGTGCGGGGCAGCTGGTTGTGGTGGTGGCGGTGGAGGTGGTGATGACTTAA
CTTGCAAATCCTGGAGAAACAAATAAATTGGCCTTAGGTAGAGATATGGTGCAAAAGCAT
GTTAAATCAAATAGATAGAAGATAGTGAAAAGGACATTTTACAGGAAACATGTCCTTGAA
TCTAGATACAAATTGGATATATGCAACCGCGAAACTGACCAAACAAAAACACTTCACAGA
CTGGTTAATGCTACCATAGCCTAATATGATGTTACTATCAGCTAACTTAACATTTTGACG
CAGTAAACAGATGGCATAAATTCAACAATCAGTGCACAACATGAGCAATCACTCATGAAT
ATTTGGCATTACGTAGGCATCCTTTTCATGCTTCCTTGCCCCTGCCAGTCTGAATCTGAG
CCCACCCAATGAAAACAAGGCAAATAGTAACACAAGAGAAATATTCCACGCGTGCGTTTA
TACAAGTACAAGCATGAATGGTTTCACAAATCAAAATTGCACCAGTGATCCTGTTCATAA
AGCAATATACCTTGATATCACTTCCCCGGAAAAGTATGTACTCATAAACTTTGGTGCTAG
CAGGAATTTGCACTCCATCTTTCTTGCGCCCTTCGGTTCCAAATGATCGAACTAGAGAAC
AACAAATGGACAGACAGGTGTAAAACAAACATTGGGATGAACAAAGCGTCTAACAGTGCT
GGAAGTAAAGCAAAGCGTAGTCAACACTTGAGTTGTACGGATACGAGAATAAGCATCAGG
TGGCTTAAAAAATCTTTTAAGAAAAACTAGTCGCGAAGGTCAACATTGTTGCATCCCAGA
AATTTCAAATTGAATAACACGTAGCTAGGTTGGGGGCTGAGATTCACCTCACGGGGGAAC
CAAATCTAGCGCTGAATCAAGCGAATCTGAGGAAATGAGAGGGGGAGCGGGCGCGGGGGG
CGGGATGGAATTAATACCATTGCGCAAGCCGATGCTGGACTCCTCGGTGTTGATGTTGTA
GAGGATGCCCTCGTACCTGATCTCGCTCTTGGATGTCAAACTGATGAGGCTCCCGATGTA
CGAGTCCGGCGAGGCCGCCGCCCCGCCGCCGCTGGAGCCGGCCGCGGCGGGGGGCCCCGC
GGAGGAGGAGGTCGACGACGACGGTGGGGCTTCCGCCGCCATGGCCGCCGCGGGCGCGGG
TGTGGGCGAGGGCCGGGAGCTAGGGTTAGGGATGCGATGCGATGCGAAAGAGGGAGAAAC
GAAACCCTAAGCGGCTGATCCGTTTGGGATGTGCGCTTTGGTTTGGATGGTGTTTTAGCC
TATTAAACGGGTCGTTTGGGTTAGTTTGGGAATTGGACAGGACGTGGCTTCCATCGGAGG
CCCATATGTTGCCGTTTTCTTGCTACCAATGCAAGAAGATGCCTGATCAAATTTACCTCT
ACTTCGATTTAGTTTAGTCCCTTTTAAATGGCTTAGACTTTAGAGAGCCCAAATTACAAA
ACAACGAATGAATAGTTTGCTTTTTCATGATTTAATGGTAGGCCACAATGAAAAATAATG
CCCCCAACTGATAACCTCTCTAAAACTCTATCTGACAGCTTCCCATGTAGCCAATATTTT
TTTTCTCAATCATTTCTTATCATTATTATTATTGTTGTTGTTGTTCGTTATGATAGTGAT
ATAAATAATAATTACTATTTGTTGCCTTCTTTTCCTTGATCCTTTATTTGATATTTGTTT
AGATATATAATTGTGCAATTACTCGTGTTTTTAAATTAAAATATTAGGTTGAAACGTGCA
AGCCCTTATAAATGTCATGTCTTATTCAATGGACTATCTTTTTTTCCCTGATTACACGGT
AGGTACACATACAACACCGCCCTCACGCACTCCGCTAATGTGTCCTCTAACATATAGAAG
AGACAGAAACCAATAATACATGGTTGAGTTTACTAAAGTTGTATTGAAAGCTCGTTCTAC
TGCCTATCTTTTATGTTGTTATCCTTGCACATTAAAATTTCGGAGGATCAACCGTCGTGT
GTCCAAACTTCCTAGGCAGTTTTATCCCACTTCGATTCTCCAACCAGGATGAAATATATG
TGCGCACTCAAAACGAGATAGTAAGTCATTAGCATATGATTAATTAAAATTTTATCATTT
AGAACTTGAAAAATGAATTTATTTGATTTCTCATAGCAACTTCTATATAAAAACTGTTCG
TACAAAATAAATCGTTTGGCAGTTTGGTTCATTCAGCCATTATGTTTAGCAGTAGATTGA
TTATCTTGTCAAGTTGCAGAAAATCCCAGGTACGTCGTCCTACGTAGCAAGCAGATGGAT
TATCTTATCCAATCCAGCCACGCCTCGTCACTCGCCACCCACACTGCGCAAGCGCAACGC
ATATGCCAAATCGCCATCCTTGCGATGTGATGCGATGCGATGCAGCTCTCACCTCTCGTC
>Os05g0429500|Os05g0429500	Os05g0429500; upstream from -3000 to -1; size: 3000; feature type:gene; location: Oryza_sativa.IRGSP-1.0.46:5:21079883:21082882:R
ATCCTGACAAGAAGGAAGGCAAGTTCGCGAGCAAGATACAGCTTCGGATGTCGCTGGACT
TTGGGTACCATGTTCTTGATGAGTCCACCTACTACAGTAGTGATCTCCAGCCATCATCGA
AGCACACACGGAAGCCAAGCATTGGGATCCTTGAGCTGGGGATTCTTGGAGCACGAAACT
TGATACCAATGAAGGGGAAAGATGGGCGCACCACCGATGCTTACTGTGTTGCCAAGTATG
GACCGAAGTGGGTGCGCACGAGAACCATTCTCAACACTCTGAATCCTCAGTGGAATGAGC
AGTATACTTGGGAGGTGTTTGATCCTTGCACGGTGATTACAGTGGTGGTGTTTGACAATA
ACCAGATTGGCAAGAATGGCGATGCCCGGGATGAGAGTATCGGCAAGGTGAGAATCCGGC
TCTCTACCCTGGAGACTGACAGGGTGTACACCCATTTCTACCCTTTGTTGGCTCTCAAGC
CCAGTGGCCTTAAGAAGACTGGAGAGTTGCATTTGGCTGTGCGATTTACATGTACGGCAT
GGGTGAACATGATTGCGCTGTATGGCCGTCCATTGCTGCCAAAGATGCACTACACACAGC
CAATCTCAGTGATGCAGTTGGATTACCTGAGGCACCAGGCAATGCAGATTGTCGCGGCGA
GGCTTAGCCGTGCCGAGCCTCCACTTCGCAGGGAGGTTGTGGAGTACATGCTCGATGTGG
GATCGCACATGTTCAGTCTCCGCCGCAGCAAGGCCAACTTCTACCGTATCACCTCGCTGT
TCTGTGGTTTTGCAGCGACGGCCAAGTGGTATGATGGCATCAGAAGCTGGCGAAACCCAA
TTACAACCGTGTTGGTGCATATGTTGTTTCTAATACTGATCTGCTACCCAGAGCTCATCC
TGCCTACCATCTTCCTCTACATGTTCATGATTGGATTATGGAACTACCGTTACAAGCCAA
GGCATCCACCTTACATGGACACTAAGCTATGCCATGCTGAGTTTACAAACCCAGATGAGC
TTGATGAGGAGTTTGATTCATTCCCTAGCAGCAGGCCAGCGGACATTGTAAGAATGCGCT
ACGATAGACTAAGGAGTGTTGGAGGTCGTGTGCAGACAGTCGTTGGTGACCTGGCGACAC
AAGGTGAGAGAGCCCATGCTTTGCTTAGCTGGAGAGACCCTCGGGCCACCGCCATCTTCA
TATTCTTGTCCCTGGTTGTTGCCATTGTGCTGTATGTGACACCATTCCAGGTTCTGCTGG
TTATTGCAATGCTATACCTGTTGCGCCACCCCCGGTTCCGCAGCAGGATGCCCTCTGTGC
CTTTCAACTTCTACAGGAGATTGCCTGCCAAGTCTGATATGCTCCTTTGAGCCCAATGCA
TTGAGAACAAGAGAAAATGGAGGAAACCCTGTAACTTTGTTTCTCTCTTCCATTCAGTTC
CCTACTGATTAGCATCAGATCAGATGTGAATATACTTAAGGAGTTGGTAAATTAGAGGCA
AGTTAGCGGCCAGGGAATAATGTGTTCATTCGAATGTTATTTGCTCAGATAGGCAGAAAG
AAGGGATTGACTGGACCCCTTCGAGTTTGGGGGGGCAGAGTTTGTTAATGTCGTGTTTCT
TGGGGTAAGAACAATAGGCAGGCGCAAGCTAATCTTCAGTGTATTTTGTTTATGGATTTG
TGCCAATTTTGTTATTTTCTTCATGTAATCATGTACTACCTGTTGGATGATGATGTTTTG
CATTTCTGTGTGCTTATTCCTCTTGAAGCACTCGGCCTTCTTTTTCAGTGGTCATGCACT
CATGCTGTTCTTGCTGAAGTTGTACTTCTCAGGCTTGCGATGTTTGTTGTTGCTGAAGTT
GGTGCGGGTGTTTATTATCATGAAACTTTATTGTCGTTTTGGCTTTGCAACAGATTGATT
TTGCTACATTTACTCTTGCCATATTCCAGTGTGATGTTGTGGCCTTCTTCGTCGCCGTGG
TCCGCTGCAGAAATGTAGTGTCTGTTTCGTACGCGACGCAACCGACTGCAAGAAAGGAAT
TGGACAGCTATTGACCGAGGACCAGCTATTGGTACGAAAAGAATGCTGGTCCATGAGATT
GAGACCCAATTGAATTTGCCAAGAAGGTGTTGGAAAAAACAGGTGTGAGAGAAGGTCGCT
TTTCTGTTCTGCATGAGCCATGTGGATTTGGTTGTCTACTTGCCTACCTAATGGCAGGAT
GAGTCCTGCCTGACTCTGGCTTACCGCGGGTAAACCAGTTAGTTTCAATTTGCTCGGTAA
CCCTCTGACTTACGGGCCTGAACTGCCAATGCAAGAGTGCGTTCCCATCCATAAAGCGAT
CGACCTCGAATGCATCGGTGATGAGAAAATGATAATCTTAGAGCTGTAGAATTCTGACGC
CCCCGGTTTATTTATCTTTTTTTTTCTTTTTACCAACAAGGCAACAACCAAATAATTTCA
TTATAGGGGTCTCCTTTCTCCTATGTTTCTCGAGTAAGATCCTTTCTCCTATGTTAGTTC
ACCAAATACTCGTGAGTGGTCGTGCACAGGTACACTGACCCAAGACCATTGCAACGTGCA
TCGATCGATCGCACTAACTGTCTGTCTGTTCAGTAGACTGTAGTCATGGTACAATGATGC
ATCCCCCGTACAGCTCTGAACTGGCCTGTGACAACTCCCAAGCCCAAGATATCTTACATG
GGCCGTGTTCCACAATTAGGCCAGTGCAAGCCCAACAACTATCTTGGGCCAGATTTTCCC
TTCGATTAGAACGCGCGGAATCCTCGCCATCCGGCGGGGAAAATCCACGGCGCGGCGCCG
TGGCCGTCGGATTTCCCGCCGGCCCCACTCCCATCCGCTTCGCCGTCGCAACGCGAGCGC
TCGTCCGCGACCACGACCACGACCACGACACGACGAGCTCCAGAGCGCGCGCGGCGTGGG
AGTGATCGCGACTCGCGAGGGAAGAAAAATATCTGGACGCGTGGCTGTGCCGAGACAGGG
>Os08g0485900|Os08g0485900	Os08g0485900; upstream from -3000 to -1; size: 3000; feature type:gene; location: Oryza_sativa.IRGSP-1.0.46:8:24027174:24030173:R
GGACTTATGCTTTTATGAGAGCGACTAAAATAAGTCCCCCCATCCAAACACTACTTGACC
CACATTTTAAAGCAATGATTGAATAGAAAAGAGAGTGAGAGAAGAGAGTTTAATATGCTT
GTTACCAGGTAGTAGTGTTATTGACTGGTATAGTTATTACCTGCTCTACTACCCACCTCC
ACAATGGTAAAGAACTAGCATCATCGAACTCATGCATGGTGCTTGGTGAAGAGGATAAAT
GTAAAAGAGGATGGACTAATAGATACGAGTAGGAAGTGGTGCTAGGAGAAGTTATGTTCA
GAGAGGATGTTTCAAGAGAAGAGCCGTCAAAGGAGATGTGCAAGTTCTAGAATGATAGGA
TCTGTTCACTTTGATGCAATTTTCAATCATACTATTTCTGATAAAGTTGTCAAAAAATAT
CTACGTTTAGTTTGTTGTCAAATTTGGTCAACATATAAGAAATCCCACCAAAATTTTGAC
AATATTGCCATCTTGTTGGAATTTTGGCATAGCTAAAACTTGGTAAGATTTATTTTAGTT
ACAATCTGAACAGGCCATAAATCTAGCTAGATCCAAATTCAAATAATCGTAGCTATGAGC
ACAGGGAGCTCAGATCCGATCACTAGAGTAGATGAAGAGGAAAGGTCTAGGGGAGCGTAT
CCTATGAAAACCAGCTATCATGTGTAAACTTTGGAAACTCCAATCAAGACCTCTGTGGAT
GGGCATCCGATGGATAGGGTTGGAGGTGGGACAATTTTGTAAAAAACCGTCCGCAATTAG
CCTTGCTAATCTCGTTTTGTTATTGCAAATCACCTCCGCAGCAACCCCGTCCAGCGCCCT
GGGGCGCGTCGTCCGCTTCGCTTCGTTTCGACTCCGCCTCCCGTGATTCAAGACGACGAC
GACGACGCCCAGTGAATCGTCAGACGCCGCCGGGGTCGCGGGCCTAACACGATGCCGCCG
ACGCCCGCTGCCCCTTCTTTTCTCGTCGCGCCGTCGTCCCTTTGCGGGTCTCCCGTCGCC
CGCCCGCTCGAGAGCTGGCGGCGCCGCCCTTCTCCGGCGATGGGCCCCCGGCACCGTCGC
GTGAGCGGTGGCGATGGAGTGTAGCAAGGCCGGGACTGTGAATGGTGGTCAAGAGGAGGT
GGCCATTGGCCGAGTGGAGATGCCGCCGGCGCCGAGCTGGACAGAGACGACAGTGCAGAT
ATTCAGATAACCAAGTGCTTTCTTCAGATAACTGAGTGCTTTCTTCAGATTGGGAATGCT
GTGCATCTGATAGTGGAGTAATTTTGTTGTTACACCTTACGTGCTTGCTTGATCCTAAGC
AAGTAAGTAGTGTAATATTTTTACTCCAGATTCAGAACCATGTATATCTTTAGATTCAGA
ACCTTCTGTGTCAACATTGATTTAATGCCAATGATAAGTACTCCATCTGTTTCACAATGT
AAGTCATTCTAGTATTTCCCACATTTATAGTAAATGTGGGAAATACTAGAATGACTTACA
TTGTGAAACAAAGGGAGTAGATTGCAGTGAACTGAAAATCAAAATGGAATGTGATTAACT
CAAAATTGACCTGGCAAGTACATGCAGCACAATTGAACTGAAAATTAGGAGCAATAAGCT
GAATGATGTCACTAGTAAAAAAAAGGTGTTTACAAGAAGCATTCCATAGCGGGCGCCGCA
CAAGAGTACATTGTTCAATTCATCTTAAGAGTACATTTAAGAGCAGAAAACAAACAACAA
CAGAGCTTCAGCTTCATGGCCGTGATGAGCTTCAGCAGACAAGCAGCAGGAGGAAGGAGG
AGCACGAACAGCAGCTTGTCCCAGGTGGGCAGCACCAGGGGCCCGATGGCTGTGATGTTG
ACCTTGAGCGCGTCCCCCGCGATGGCGATTCACTGGGCGGCGGCGTCATCGTCTTGAATC
GCGGGAGGTGGAGTCGAAACCAGGGCGCCGGACGGGGTTACTGTGGGGGGTGATTTGAAA
AAAAAAACAAGATTAGGAAGGTTAATTGCGGGTGGTTATTTGCAAAATTGTCCCACCTCC
ACCCCTATCCATCGGATGCCTATCTAGAGGTCTTGATTGAAGTTTTCAAAGTTTACACAT
GATGGTTGGTTTTCATAGGATACGCTGCCAAGGTCTAGAGAGGTAGACTCTTATTAAAGA
TATTTTGATCCTTTTGTTACTATCCATTATTTATCTTTTTTACACTTTATTGTGTGCAAG
TATTTTACCCTAATCGGATAATACAAATGAAGCTACGAACTAATCATAGAGGCATGTCTT
CCGCCTAGTTGAAGGTCAATTTTTCCTTGATATGGTAATTAGTTTTTATGTTTCACATAT
CGATTGTTGGTATTATAATCAATATATTTTAAAAATATTTCATCTGATTTAAGCATTTGA
TACCGTTTAATTTATGGTTTGGGATCGACCGTCCGACGTCTAGTCACATCCTAATTTAAA
ATGTACCACATTATGTTAGGTGTGTTTTAGTAAAAATAGAATGATGTCATATACTACATT
CGTCTTAAAATATAATAACTTTTAGCTATGAATCTGGACGCACAATTATTCAAATTCATA
GCTAAAAATATTTATATTTTGGGACGGAAGGAGTAATATTAAAATAAAAGAATAAAATCA
ATTTAGAGTTAAAATTTATGTCTTGAAAATTAAATTTTGACTACAACATATAAGTTGAAA
AGCAAACGATAAAAAACTAATTTTGGCTACTGAGTACCGTCGCAAATGTATATCATATCG
TTATCAACACTATTTTTTTTAAAATAGCGTAAATATTAGAAAATGATCTAATATCAAATA
ATTAAAAGAGACGAGACTCTAAACCTAGATAAGTTGGCCGGAAGACCGTATAAAACAAGC
ATGGATTTCGCATTTCGTATCCGCTGAGTTTCCCTCCTCTCAAACACGATAAGAAACAGA
CGAACGCGAAAAGCCCAAAAAAAAAACCGATAAGCACCCATTCTCGAGCCAATCGCGCCT
>Os09g0294000|Os09g0294000	Os09g0294000; upstream from -3000 to -1; size: 3000; feature type:gene; location: Oryza_sativa.IRGSP-1.0.46:9:7009478:7012477:R
TTTTTAAAAATAACTTTCTTATAGAATTTTTTTTTAAAAAAAATACGTCGTTTATCAGTT
TGATAAGCGCGTAAGGAAAATGAGGGAGATGAAGTTGAGAAGACAGAACTTATGAACACA
AGTGCTACAGCACGCAAGGAACAACTCGAAATAAATCTTACTCTACTCCTTTTATCAATA
TAGCTACATGGTCTGTCTAGATTTATTAATTGTAGTAGGATATGTTTTATGTAATATAAG
GTTGGATGAGGATAGTTAAACGGTAAAAGTAAAGGAAACAGTGAGTGCCCTTTGAATCAC
ATGAATACAAAAATTGAGGAAAGGAAAAACACATGATTCTAACAAGAGCAAAACAAATGA
TTGCAAAATATAGAAAAACATAGGGATAATCATTTGATTGGACCGCAGTAAAAACATAGG
AATCAGATGAGAGAGATAAACTCAAAATGAAATTTTCAAGAGGTTTAAGCTCTTACTAAA
TTTTCTGTAAAATCTGTATATGATTGTTTATTCTATAGGGATTTCGAACGATGATATAGG
ATTCAATCTTTTGTTTCAAATACCTTCGTAGAAAATTTTTCTATAAAATTTAAATCCTTT
AAAATTTTTATATTTTTTCTTCAAATCAAAGACACATGAATAACAGCCAACTCCAAAGAG
AGGAGGGGGCCACCACCACATTGAAGTCACTAGCCCCCACCCCACCCCCCCAGAGCCAGA
TTATACCGGTGCGCAACGCATGCGCGGGGGGACACACGACACGAGAGACAGCGACGTGTG
CACGCACCGTTCGCGTTATCGCACAGTGATTTTGGTGATTTGATTCGATTCGCCGCGCGG
CCACCGGTAGCCGTCCGCCTCCTCTGGGGCTCTGCTGTCGCCGTCGATCGATCGGCTCCT
TTCCGCCAACTGCCGCCGCGACTCACTTTCACTAGCTTTGCACTAACACAATCGATCATG
CATGCACACACCCCCGCCTGAGAAAACAAAAGGCGCGAATTATTTTTGTGTTCCTCTGTT
GCCTGTTGTGGTTTGTTTATCTTGGGTATTCCGGCCAATATGAGATCTGATGGGATCGAG
GAGAAAGCGACACTGCCATTTCACATCTTGGAGATGGGAAATTGCTCCTGAGTTCTCACT
CAATTATTCTGGGAATTGCTAAAATAATTACCGCAAATATTGTTAACTATGATATAACTG
CACTGGAATTTTTATATAGCTTAAGTACATTTTTTATGGAAGTTACATGTATTTTAATAA
TAGTGCAAATACATTATAAATTATATTTGAAAGTTTTCTGACAATTTTCTAATAGTCTTA
TCATTTTTAATGTCTTTGAACTTATCCCTTATATACGCACTTGAATTTTTATTTTGATTC
TCACTATATGCATTACATTAGTTAACTGTTAGTTTTATTCAAAATGACTTTATTGCCTAT
TTCTCATATCTATGTGCTACCTAATTAAAAATATAAATCTCAATATAACTTTTAAATTTA
AAATAAAATAAAATGAGATAAATTATTTATGCTAAAATTATATAAGTTTTGAAATTTTCA
AACAAAATTTAAAATTTTCAATCAGATCCATGCAAGGATTTCATTGGGAATTGAAAACAA
AAATTTTTTTTAGTTGATTTAAAATTTTGGTGAAATTGTTGTATGAATATCATTAAATTT
TATTTTTATATTTATTAAAAAAGGTTGAATTTTCAGTTTTCAATTTTTCAGACAAATAAT
CTTATCTTCTTTTTTTTAAACAAATGAATCTTTGTTCATGTTGAGAATCAAGTTTTTTTT
TTTTAAAAAAATAAGCTAGTGTATAAGCAAGCGAGTGGGATAATATAGTCATTTTGAAAA
AAAAAAATCAATGACTAGTTCACATTGAACTATGTAAGATTGAGATCTTTCCCCAGTTTT
CCCAACTCATCTTCCTTGTTTTTCGTCCGCATGCTTTTTAAATTGATAAATGGTACGTTT
TTTTAAAAAAGTTTATATACAAAAATTGCTTTAAAAAAATCATATTGATCCATTTTTAAA
GAAAATAATTAGCTAATACTTAATTAATCACGCGTTAATGGATCGTTCCGTTTTCCATGC
GTAGGAGATGAGTTTCTAACCCAAATCAATGAACACAGCCTAAGAGGTCAAATAAATTGA
TGGTAAACTCAGGGATATATAAAGAATTTCTTCTTTTAAAGAAGCGTAAACCTCATTTAG
ATTGAGTGCGTGTAGAATCTTTTTCCTGAGTTCCTACAAGAAATAATATTGTACTCCTAC
GTATCGAAGTCATGCGAAACTCATGCATGGCCTTTTCACGTTTTTCTTGTTAAGAAACCC
CAAACAACAAGCTTCTAAATTAAAACGAGCATCGCATGGGCTGTGTAATTTGGTCGCATG
ATTGTTATGTTGGGCATTAATATTTTCAGCGTTTAAAGAAATTAACTTGACAAGCTAATC
ACTTTCAAAACTAACGATATACTAAATCAGAGAAGTAGAGAGCGTACCACAAATGAGGAT
AGGCATGCATGATTGAAGATTTGAAGAGCACATGAGAATTATACTTCGCTTATTTCAGCA
TAACTAAAACTTATTATTATTATTATTATTATTATTATTATTATTATTATTATTATTATT
ATTATTATTATTATTATTATTATTATTATTATATAACCAATATCTTTGTCTCGCTGGCAA
TACGATTCCAAGCTGTGTGTATTTTTCACATCAGTTTTTTTACACATATTGTAACAAACC
TAAAACCTTTGTGTATTTTTCACATCCTAATTCACGCTGACAACAAATCGACAACCAAAT
TTAATTTATAGTGTCATTGTCCAGGTTCATCAGTAGAAAACAAATCTCGCCAAACCTTGC
AAATAAAAAAACAAAAAAAAAAGAAACAAAGTACTCATCCGGATATAATTATAATTAACT
CGGCAATTTGGTTCGACGACGTGATGAAAAAGCCGCGGCGGGCGCGGGCGTGCGCAGCTA
>Os09g0297000|FC1	Os09g0297000; upstream from -3000 to -1; size: 3000; feature type:gene; location: Oryza_sativa.IRGSP-1.0.46:9:7195635:7198634:D
CTTACCCGTTATTTACTTTTAGGTCTTTAATGTGCTCAAACTGGTACCTAGTCTGCCAAG
CATAAGCAGAATTTTTTTTTTTTTGGTATTGTCCTGAATACAAGTTTGAGATACCGTGCA
TTTGGTCTTGATCGAACCGTTTAACATCGTTTATTTTTTGAAGCACACTGCCAATCGTAT
TAATAGAAAATGGACTGGCTTTCAGATTTTTAGAGAGGATCAACCCTTTTGGCTTGAGCT
TCCTTGTGTCCAAATTCCAATCTACCTTTGCTGGGGGTCTCGCTCATTCTAGATAATTCT
AAGGCTACAGATGGTGTTTTATATTAATCATTTTTCTGTATAATGTGAGGTTCTGGTATT
CAACTTTTCCATTACTGGTAATGAATTCATACTGAGCTAGGATCCACTAGGGTTCAATGC
TTAAGAAAATGTTGTGCCGAGGATTCTAATCTATTGTTTGATTGGTATAGCCAGTTAGGC
CAGTTTGATTGGTTCTACTTCTGAGTGAACCCAATGCTAATTCTTTTCGCAGGAACTTAT
CTCCACAGATTCATATGCCCAATGAATCATATCCCATCCCAGCTAAATCATGGTGGTCAA
TTTTGAAGGACCAACATGCAGATGTTCGCCTTCCTGAGTAATCCACAACATGATTGCACT
GAGACTCCGGAAAACATTTTGTGACGATCATGAAGACTTCGCTCTGCACCTAGGTAACAG
TGACGCGGGTAAGAACTAAGAAGCAAGCTGTGAGAGAACAGTCAAGGAAACCGCTCCCGG
TGGCAGCATATGTGACTAAGTTAGTGGTTGACTAATTTCATTGCTAGAGGTAGAGCAGGA
GGATGCTGGTGTATTGATGCTGCCTTAGCCAGAAAATGGGGTAGCAGATGAAATCTAGCA
ATTGGCATACATGTCAATGTGTCATGTTGCTCTGCATGACGTTGTCCTAATGGACTGTAA
CAATGGGATGTTGCTGCAATCAGAAGCACATACGCTCTTATTAACATGATTTGCTGTTAT
GCAAATCTTTTTTCTGCCGGTATATGGACTGGGGTTGGTGTATGTTGGGCAAATGAATCC
CAAAACCACATTAGTAAATGCGAGAAAATGGGTATCATGATGTCATCGCATATCACTTCA
AGATTAATTAGAAAGGCTCGTTTGACAAATAGGATAGGGAAATAATATCCCATCCATTAA
AGGGTAATATTGTATTCTAACCATTCATTCTTTATACCTCATTTAATCTTAGTCATTCAT
CCTTTTTTTTCTTTCCCAATCCCACATCTCATAACCATTTGCCAAACAGGCCTTGAGGAT
TTTGTTGTCTTATTCCTCACTTGTGAATGACTATGATTAGCGAGTGATGAATTTGAGGCT
CCTTTGGATATAAGAAATTTAAGAAAAAAAAAATACTCCCTCTGTTCCTTGATATAGGGT
GCAACTGGTATAGGGTGCAACTGGTTTTTTAAGTGTACCAGAATATAAGGCATCCATACA
CATGCAAGCAAGCAGCATTAAAACAAAAAGTATGAAATCTGGTCGACTTCCGTGCGCATG
CATGCAAAGGCTTTCAATGCGTGGAGTTAGCTCTTCGTTTCTTGCGTTCGCGGGGTCGTT
CACCCACCAAATAGCAGGTTGTTTGCGGGGAAGGATGCGAAGAGCTGCATGCATGAGCAA
AGGCCGATGCACACGGAGAAGCGAAGCGTCGCAGGCGTCACCCTGAGAAAATCAGTTAAG
CCTCCTTGGTATTGCCGTCCAGAGCATTTGCGCCCTATATTAAGGAATGGAGGGAGTACA
GGATTATAGTGTTCTAGCCCCTTAAATCATATGGATAGAAAAACGTAAAAAGAAAAAAAA
AGTAAGAATGATAATTTGAATGGAGTGCAACGAGAAAGAAGAGAGGTAGACACAAATGAC
CCATTTTCCCAATAGGTTGATGGTTATGTTATAATTTTTCTAAAAGTTCTTATGTTTTGA
GTCAATCAAAAGAAAATTATAGGACTTTTGATAGCTATTCTTTTTAATCCAAAAGGCTGC
ATAGTAAAAAAAATTATAGGATTAAACTCCAAAATTCCACCCCCTTTATTTTTGTCAAAA
TGGCCATTTTAAAAACTTATTTCGAAACTAACCATACAAAAGAATTCATCCAAAAATAGG
ATGGGGGCTTAGCGCCAAAGCAGTTGGCGCTGAGGTTAGCCGTCTACCAGTGTGGTGGCC
GAGCCGATCCCCCGTCAACGTGGAACAACTAACCTCAGCCTTGGTGCTAAGACAACTAAC
CTCAGCGCTACATGCGTTGATATTGAGGTAGTGGCCATAACCTCGCTTAGGGAACAACCT
TAGCGCTAGCGTAAATGGTGCCGAGCTATACGACCTTAGTGCCATTACGCTAGCGCTGAA
CCCTCACCGCTTGGATATCGCTATGTACGGACCTCAGCGCCATTCCATCTTGCATTGACC
TATGCCGGCTCAGTGCTTGCAGGCTGCCTAACACAGGAGAAGTGTTGGGCGACCCAGGCA
CGAGTGCTTAGTGCTGAAGATCAGCGTGGGAAGGAAAGGCGCTGATAAGGGTTCAACGTG
AGGGTAATTGGCGCTGACATCCTTGCCATGTCGGCGGGGGGAACGGCTCGGCCGCCGCGC
CGATAGGGTGTCAGCGCCAAGGCGGTTGGCTCCGAGACGGCTTATATTAGCGCTAAGAAC
ATTGGCGCTGAGTCCGTGATTTATTTTTGGATGAAGTTTTTTTTACACGGTCTTTCGAAA
TAATTTTTTGAAAATGGCTAATTTGTCAAGAAAAACCGTGGCCATAGCCATCTGCGTGCT
TCGTTCTTTGCGAAGCTCTTCATGGATGCTTTGAGATTAGTGCCAGATCGTGGGAGGTAG
GTGTGTGCCTGTGCGCTGCGTCTTTTGACCAACCCAGTCGTTGACCCAAGACGAAGCGAA
GCAGGCGACCATTTTGTTTTTTTCCTTTTAATTTATTATTTCCAACCAAGAAACGGAGGC
>Os11g0455500|Os11g0455500	Os11g0455500; upstream from -3000 to -1; size: 3000; feature type:gene; location: Oryza_sativa.IRGSP-1.0.46:11:15422973:15425972:R
GCTTCTGACTTCTAACTAATTTTCTAAGATTTTACAACTGCAGCTTCATAGGAATTGTAT
GAAAATCTATATTGTTTGAAGGAGTTTCTAGCAGCTAAAGATTCTAGAAAAAACTGTAGT
TATCAGAAACTCCCCTAAGCAAATCCTATAATGGACATAAATGACAATGTTTATGTACCA
TACACATCTCCATGTTTTTTTACGGATCTTAGTTGACATGGCGACAGCTGCGTCGATTCC
CGTAAACTTATTTAGTCAAAACATTCCATTAAGATCTTAATCCCGGAGTAAGTGCTAAGC
AAGGCTATGCTTGTTTGGTCTTTACACACTTCAAAGAAAGATGTTCTCTCTTTCTTAATT
CCTTTGCTCCTACTGCCACTACCTTTTACTACGATACCATTCGCACCTCAACAATTTTGC
ACATAGTTTAAGTTTATCGATAACTAATAAACCATGTGAGCTGATCAAATAAGCAAGATC
ATCATGACGGTATCTTCGATGAAGTAGTGTATAAATAATAATTGAACCCCCCAAGTATGT
AGTGCTATACTCCCTCTGTACTCATAAAGTAAGTCGTTTAGGACAGCGACACGGTCTCCA
AAACACAACTTTAACTTATTGTAAGCTATAATTCAGTACGTGCTCCATTATTATGTGGTT
TAATTAGTGTTTTGGTTTAGTGGTAGGTGTTTGATTTGGCAACGATGCGTTAACACGAGT
TACATGCAGCTGATTAATGATTAATTGTTGTTTGGGGTGCAGTGGTCGTATGTCACTTTC
TGGACATTGAGTTTTTTCTACAGGCTTGGTGTAGGAAAAGAACAATTAATTAATAATACT
AGTGGAAACAGCTCGGAGAAATCTGCTGCCATTGCACCTAAACTGCAAGTGGAACTTTGG
TGTGGTGACACTGAATTTCGTGCGGTTTGGTCACTGTCACCAAAAGTTTGGTATTCATGC
TTGGACTCCTGGTTGGCATAAAGGTCTGTCTTGGACAAAAATATAGTTCAGACACCTCTT
GTTTCCTTGAAAATACCCCCTCCTTCCCTAAATGATTAACACCGTTGACTTTTTTAAACA
TGTTTGACCGTTTGTCTTATTCAAAAACTTCTGTGAAATATGTAAAACTATATATATACA
TAAAAGTATATTTAACAATGAATCAAATAATAGAAAAAGAATTAATAATTACTTAAATTT
TTTGAATAAGACGAATGGTCAAACATGTTTAAAAAAGTCAACGGTGTCAAATATTTAGGG
ATGGAGGGAGTAGTATAACAACACTTGTCCCAAAATGTTTATCAGTATTATACTCCCTCC
ATATTCGTAAAGTAAGTCGTTTTGGACAGGGACACAGTCTCCAAAACACAATTTTGACTT
CTTATTTCTATAAAAAATATCTATTTAAAAATGATATATGTATACTTTTATGAAAGTATT
TTTGAAGACAAATCTATTCATATAATTTTTACATTTTCAAACTCAACAACTTAAGAGTTA
TTTATGATTTATATTTTCAAGGTTAGACTTAACATTGACCTAAATGACTTTCGTCAATGA
CTTTCTTTACGAGTACAGAGGGAGTATTTCATTTTGATACCCTCAACAAATGGTTCGCTT
TTTCTTTAATGGAATTACAATTGAATTCACATAACCTTCACATACCAAGCACATAAACAT
AAAAACATGCAGTAATGCACAACTACGCCAACTGACCAACAGCCACCAGAGCATGTAATC
GCAAAATCTAGCTTCTTGTCAAAAATGGCTTGGGTACCATGTCTTTTCTTGTTTTTTTTT
TAAACACCGTCTTTGTACACATATAAAGATAGAAGATGATTGGTGAGCTCACAAAATAGC
ATGTTGTCTTTTCCCCGACACATTTGGGTGCTTAGGAAATGAAAACATACCGGCTACATA
TTATAACTATAATAATTAAGTGCTATAACATTTACAGGAGAGTGGCTGGTCTTATAAGTA
TGATATTATGCGAGACTATGTGCCAAGTAGACTAAAGCTACAATCAACGACGACATCCCT
TCTTAATACACAATAGGATGAATATAATGGTGAAAAAACTACTACAATAAATACTACATT
ACTCGCACACAACTAGGTTCTCGAGATTGCTCTCCTCTCTGGATTGATGTGTTCGTTTGG
CCATTCCTAACCCAAGACACTAAATATAATTTCCAAAAACTTCACATCACCAAGAAACTA
GTACTAAGACACAACTTTTCCAATGCAAACATCATTATTCTATACTTAAATTTAATGCTA
CTTATTTCACATGATGTCTTGGATGTTGTGTAGAAATTCTCTTTCCTCATTTATTCATTT
GCTATATCATTTTTTATTCTAGATGGCAATTTATTTAATACTATGGATACCATCTTAGTC
ATTGGGTTGGGAATGGCCTAAGATCACTCACCATGTCATTAAGCAAGCTCTCTAGGGCTC
CGCGTCCCCTGTCTCAGCAAATTTCACTAAATTTAAAAGACTTTTTTGAGTAAAATTCAA
CTCAAACATATCTGAGTGGCAAGTGCGTGGGTCCGCCATGATCTACACCAACAAGCTCCC
CGGTTTGGATCGTGTGTGCATGACGGTGCAGCCGCCGACGCGGCGCGCCGACGCGATCTG
AAACCCATCCCCCTCTCTCTCTCTCTGTGTGTCCGAAGGAGATATTTTTCGCATCGAATG
GAGCAGCGACAAGTCATGTGAAACAGTGACTGTCCAAACCAGCACGCGTGGATTCTTCAG
ATCTCGATGTCCTCCTCCTCAGATGGGCCATGATGGGCCGGCCCCCGCAACCAACGGCCC
GGATCACCTCTTCCCCCCACCCCCATCACAAAACCCCAAACCCATCACCAACTTCCCAAT
CTCACCCACCCCACCAATCCCCACCAGATCCAACGGCCCAGATCTCCCCCTCACCCAGAT
CCAACGCCTCCCCTTCGTCTTCTCCCTCCATAAAACCCCACCTCACCCCCACCCTCCCAC
>Os01g0117300|OsRLCK17	Os01g0117300; upstream from -3000 to -1; size: 3000; feature type:gene; location: Oryza_sativa.IRGSP-1.0.46:1:976238:979237:D
TTGCCATTGACTGTAAATAGAATAAAATTAAATTTACAATTGGAGAGCCCTATTATTGTT
GGCAGCCAGGAAGTGCCATTTCACGGCGAAAGAGAAGTTGAGGGCTATATATATTGTTCA
CCAGCGGAATTTCCACAAGTGTCCATGTCCGCCGTGTTATCTACTTCCTTCGTTCTATAA
TATAAGAGATTTTAAGTTGATGATATGTCTAGATTTATTGTACTAAAATGTGTTATATCT
ATCTAAAATCTTTTATATTATGGGACGGAGGGAGTCCCGTGGATTGGCATGGGCAGGGCG
ATGAACACGGCAGGCTGTTGCAATCAGAGGTAATTAATTACTTGCTCTATATATAAGAAA
TAAAGTTCTTATTGACTAGCTAGTCAGATTCTTCTTCGCTATTGCTGTCCTAGCTAGCTA
GCTAGCTACAGTAGTATATATGTTCCATATTTTCTTTTTAACTCGCAACGCAGCTTCGTC
ATCGCTCGCCCTGCCCCTGCATATGTAACAGAAAGTTAGTAAATTAAGATGAGAGGATTT
GTTGGCGCAGCCGTCCTCCTTGTATGCAACCTGGCCACAGCGTCAGCGTGGAAGGATAAA
GATTTCTTCAGCGCATGCCCAGCAAAGCAGTGTGGCAAGGTTGAGATCAGGTACCCTTTC
CGATTTGAACCCAGCAATACATCGTCCTCCTGCGGCTTACCATGCATGAAGCTAACATGC
TCTGACCGCCAAGAAACTATCCTAGATATCAAAAATTACCTTGGAAGGCCATACAAGGTG
ACCGCCATAGATTACAAGCGTGCTACCCTCACCATCGTCCCGCTCGCGGACGATTCTTCC
TTGCCTCCCACTCCCGGATGCCCGCTTCCCAACCTCATCTCCGAAGGAGCACTTGATCAC
CGTTGTGAACCATACGCAATGTGGTATGCAGCACTAGTGAAGCTGTTCGTCAGAGTTCGC
AGCACCAGCTACTATCCCTGATGCCGCCGATTATATTGCTGGCCCCATCTCTTGCCTTAG
CAACAAAACCCACTTCTTCTATACGTTGTCTGCTTATGCACCCATGTCTTTTCTTCCGCT
GGATTGCGAGGCCGTCTCCGGTAACCTCATTGCATTACCCAGAGGCAACACCTATAGCCC
TCTTGTTGATTCCTCCACGTTGAAGGACGTAGCAGAAAGAATCTTCAGTTTCAATGAGAC
GCCCATCAGCTGGATAAGTGTCATGAGTTCGCCTGACCAAATAGACCTTGCCACTGATTG
CCGAGACTGTGAAACACAGGGCCGACGCTGCGCATTCAGCTCACAAAGGAATCAAACATT
CTGCATGCCTCACCATCACGGTACCGTTTCTAACTGAGCCCCCTCATATCATCGTTTACA
GGAACACGAGCATCACTCTGCATGCCTTATTATCTGATTTTTTTTATAAACAAAAAAAAA
GAAGGCAGATAAATATATATCATCGTTTACAGGAGCACGAGCATCACTCTACTATCCGAT
CATCTTAAGTTACACTTGTGTTGGCTACAAATGTAGTAAGAAAATGTTTTAGCAACTAAA
TCAGAATCTAACAAAAACAACTGGATAAACAGGCAACTATCGACAAGTAGCATCAAGTCA
CCATAATCATAAATCTTTTTAGTGCCCAACACGCCAAAGCATTTATAACTATGATAATGC
AGTGTTAAATCTACAAGATTACCTAGATTACAATGTCCTGAATTTCTTTGAACCATTACT
CACCAGCAAAGTATTGCATCCAACAATTTCCTGTTCTATTGCTAAGAAACATGCAGAAGA
AGAAAAAGTGACATAACAAGAAGACATACTATCCCACTAATATAACCTAATTAGTTCAGC
ATCCTTACAAGTTACAACATATTCCAAGAAGTTCAAGTTGCTAGGATTGCTATCAAGATT
GAGCTTGCAAAGTGCAGGCGCTCTTGTTTCGATTCTCCCTTTTGTTATGTAATATCTTGT
GTAATCACTGCTAATCTTTCAATTTGACTTGACTACACTCACCAAAACAAGCTAGTCGAT
AGCGATCTTTTGTGGTTACCTTCTGAGAAACCAACAAGAAATAACATTGAAAATGTTAAT
ACCAGTTGGCACACGAGGACGTAACATTGGCTCATGAGTCATGTCACATGTTACACTTCA
GGCTGCTTAAGTCCATCAACATTGAATTCCCTTTTAGGAGGGCGGTATTGTCAGATTTAA
GGTTGCATCATCGTTGGCATCCTGGCTTGTACTGGAGCTGTGGTGATAGAGCCTGCTGCC
TGACGAGCTATACTAAAACAGCGATGCCGTGTCCTCCTGAAAAAAAAATGATTTGAATGG
ATAATATGCCTATTGCTTAATGAGAGTAAACAGACACAATAATTTTAGAACTGGAAGCAG
AAAATGAATTAATGTATGATATGCAGCCTGTAGAAACTAAATAGAAGAGTGACTTCCAAT
ACAAAGAGTGAAGGCAGGAAACAAGAGATACATATGATCTGCTTGCATAAAGTCACAGAT
GTAGCACGATTGCCTGTAAAGTCCAACCTACGTGCCTAGAGGTAGCTTAAAATGGGAACA
CACTTGAGGGAATACTATAAGGTAATTTATTTATTTATTCACATAACTACAGCAAAGTTG
TTCCTCATAATCTTCAACTTTCACGTATCCCCCTTTGGGGTCTGGGCCCACAATTGCAGC
TACTCATATAACAGTGTTGATTTTACATTTTTTTTCTTTCTCAAGAAGTTATTTTCCCTT
TTATGAATTAAACCATAAATCAAGTCTCAATTCTCTTCTTGGTATTTGCAGGTTCACGTA
TCAGAATCATTGCAGGTAATAATTCAATCCAAACTTCCTTTATTCAAAAGAAGAAATAAA
AGAAAACAAAAGGAATCTCTATTACATACAAATGAATAATTTCTAATTTCTATCCTAATC
AATGTGCTGATAGTCTGTTCCTTCTTCGTTTTGTATGGTAAATTGGTCTCCCTAGCTTAG
>Os04g0618200|Os04g0618200	Os04g0618200; upstream from -3000 to -1; size: 3000; feature type:gene; location: Oryza_sativa.IRGSP-1.0.46:4:31400388:31403387:D
TTTCGCCTCTTTCCTTTACTATGTGATTGTTGAACCATCCATCATGCCAGTACACCTATC
TTCCTGCCTTCCTGGGTTTCACTGACATCTGAGACCCTCACAGTCTTGTTGAACTGTAAG
TGGTGAAAATTTTTCAATCACAATGATGGACCCAGTTTTTTTTTTGTTACAGTTTTCAGA
GGGTGTACTATAAGGAAAAGAATCTGGTGCGGTAAAGAAGTAACTTCATGAAGAAGTGAA
GTTCAGGAGTCAGGATTAAAGGATAATAGTGGTTGCATGAGCAAGAAATTGCCTGTCTTC
TGTTTTTTGCACGAAGCAACTTATCGGGCATGGCATGCATATCTATATGTTCAATTCGCA
TCTCTGGATTGCCCAACAAACCAACAGTTGTCTATTGGTTGATCAGGAACTAGTCTGAGA
TGACTTGGTCAGTTGATTGCACCAAGTAAAAGCGACTAATGTGTACGGCGTACTAAAAAT
AATCATGAGTTTGTGTTGGACACTTTGACATTGTAAACTATGATTAGTCAACTATCCGCA
CCAGAAATCTTGAATAAAAATTGCATATCTTGCAGTACAGTGCTGGTACAGAAGTACAGA
ACTATTGCCTATTACAGCTAACTTTAGTCTTACAATTTCTCCTGTCTCATTAACTTTTGA
TCTGGTGAAACATAAACTGAAAAATAAATCCTTTGGTAAGGCGATTTCTGTTTATGCCTC
CAGTGTTTTAGAGCTAGTAGTTGCAATGTCATACTAATGGTTTGACAAAAGTGCAGGCAG
CAACAGGGGATCTGAGAACGACGTGTCATGGGCGAACCCATCGTCGCCATCGCCATGAAC
GAAGCTGGAGATGATGGAGCCTCCATGGAAAAGAAGCTTATTTACATCTAATTGTTCTAT
CTAAGCTGAGATTTACCTTGACAGATGTCCAGACTCCACAGATCCCTGGGCTTATGCAGA
CTGCAGAGAAGCTGGGACATGTGTCCATGCTGATGAACTGGTGCTCAGTTTGCAAATGCC
AACAAGAACAGCCGGTTAGCCACTGCACATGACAACAGGGTCATCACAATGTGCATCAAT
CTAGACCAGCACATGCTGCAGGAATCAGACAGGTGACTGAACGGTGCTCTGGTGCTGGAA
AGTTCAGGTTTTGGCTGCTTTCGCCTTCATTTTTAACCCATCTCATTTCAGCCTGGTCGC
CACTGAAAACGTGGCTATCATCGGCTTGGCTGGGTTTCCTCCTACCTAACTTCGGTATCA
AATGCATCAATCATTTTCTTGATCTGAACATTGAACATTTCATCATTTCAATGAGCCCAT
CATAAGACGTGTACTGTTTCTGAGGTGGGCCATCTGCCATTCTGCCCCATGACCATTAGT
ACCACTACTAGTACTGAAACTGTTGAGCCTGACCAAATTTTCTCCTTGATTGCAGTTCCT
CCAAACGCACAAAGATCCATCAAAAACTAAATGAAAAACGAGTGATTTGCAGCAAGTTAG
GCAGGATGCGATCTATACTCTTGCAAGTGCATGCATAGCTGAAGCCCAATCAGAGAGCAA
GAACAGAAGATTCCCAGAAATAAATAAATAGAGAAGAAAAAAAGAGGAGGAAACAGATGT
AATGGATGGAAAAGAAATTCAAGTGCTGACGTTTAAGTAGGAATTGTTAGGTACAATCTC
AAAATCTCTTGGCATGAAAGTGTTGACCATCTCTCTCTCTGCGCACGCGCCAATCTGAAA
CAATCAATCAACCGACCCAGCAGTGCTCGTTTATACTTGTAGGCTTCTGTCATCATCCTT
CTTTTTTTTTTCTTCGTGTTTATTTATGGTTGGTTTTCACCGACAAAATACTGACACTTG
ATCCACCGATGTATCCAGATTTGATTCGTAATTGGTTTGAATCATTATACTATCGTATTT
AGGAACTGATTCGAATCGTATTCCTGGTGTTGTTTAGTATTTTTACTGATGAAGTACTTA
CTGGTAGATTATTATTACTGTATTTTTAATTCAGAGAGACCTGTGTTTATTGGAGGCAGC
ACCACACATAATTGCACTGACGAATCGGTCGGCAAGGTAAAACAAGTGAGGAAGGCGCCT
TGCAATCGCAGGAGCAGCGTGGCAGAATTGTGGAGCTTTGACTTGCACAAATTTGATGGC
TTTATCAGTTTATTTATCGTTGCCATGGCAAGCTAAAAATATATTCTTGCGTAGATATTG
CTCGCAAGCAAACTGTAGATCCTTTGGAAATACATAAAGTTGTTTCTACGATTGAATCCC
TACGTAAACCCGGGACGCTAGGTGTATTCTTTATTCATTTAAATGTCAAGAATGGAAAGA
ACATTATTATCAAAATTTGACCTTTATTACTTGCTCACAAAATATATTTTTAAACCTATA
AAACCAACTGTTTGTCTTCTTAAAAAACTATACGAGTATCATTTATTGCGATATCACTAA
ATGTAATTTATGCATAACTTATATTTTTCTATATTTGTATTAAATTTTTAAGTAGAGTAA
ATTTACTCTATTTTGATCAAGATATTTTGATCAAACTATCACAAAACAGATTTAAGATGA
AATATGACAAAACTACGGATTATGTAGCAAATTTATCACAAAACCTATAAATTTAGTGTT
GATTTAATCACAAAACTACAATGTTTATAACACCAACATAACATTAGTACTAGAAATTTA
AGCTCCTTCAAAATATGTAGTTTCTAGATAACTTCAACAATAAATTTATATTATAGTTTT
ACGATACTTAGTTTTAAATATATTTTTCTTACAAATTTAACGTTAAATCTATGATACAAA
ATCTATAGTAATTGCTGATTAAAATCTAGTCCCAAAGCAGGGAGTACAAATTTGACTTTT
CAAAAATTCCCCTACATGGCTGTACTGTACGTAGGGTCCGAGTAACTGACAGCGACGTTA
ATTTCGAAAATAAAGAAAGCCCGAGAAGTAAAAATGGACCAAACTGTTGCGCCACCGTCT
>Os12g0534100|Os12g0534100	Os12g0534100; upstream from -3000 to -1; size: 3000; feature type:gene; location: Oryza_sativa.IRGSP-1.0.46:12:21239734:21242733:R
TACAATTGTGCAGGTTCAAATGCTTTACATAAGCTACAAGGTTAATTAGCCTTGGATTGA
GATTGATGGAAGTTAAGCGTCATGGAAAAAAAGCTCAATTGCTCACATTTCCTCTTTATT
TTAGTGCAAACTGCAAAGATTCCGAAATTGTCATAGTTAAAGTAACACGGGCACTGTAAC
TGGATTGGATCCCCCGTTGGACTTATTTTAAGACAAAATTTATGAATTCTAATGCAGCCT
AGTTGGGAAGACACTGTAAAAGCTCTGAGAAACCACTTAAGGACAGCAAATGGCAGCACA
TGCTTTAGATCTTGCTGAAATTTAAAAAATATTCTTTATCAACACTTGGCTTCTCCACAT
CAATGTTGATGCATCAGTTGAATAGAAAAGTCGGTCCTTTCTTGTTACAAGTGTAGACTA
ATATTTTCATGTGCATCTTGGTGGACCTGGAGTGTCCTGCTTCATGGGATTCCACATGTA
TACCTAGGTTTCAACACGTGAAACCAGAGGTGATTGAAAAGTTTGGCATCCTTGTGTATT
GTCCATGTTAAGTTATTTCTAACCGTAGACCAGATAAGTTCTGTTCACCAGAGATTTACA
AGTGCTGGTTGCTTCCTAGGGGGCTAATGTCAAAAGTCAGTGATAATTCATGTTTTGTGC
TGTAGATATATTGGCTTTGAGAGCTTAATTATGTTAATTTTTTTATTGTTTTCCAGCTTC
TTGTCAGTGAGGTTAGCGAGCATTTAGATTCACAAATGAGCCTAGTTGCCAATCTACTCT
CCTTTTTTATTGCTCATCCAGTAGGAGCACTTTTTTTTTGTGAGGACAGTGGGAGCATCC
AGTAGAAAAAAAACTTGAAGTAATCTGTTTAACAAAGGGTCTGAATGTATATTTGTCGCA
TTGCAATCTTGTGTTCAAGCACTCAAAAGTTTTGAGCGAACTAGCATTTGTTTGAGCAAA
GTAAAAATTGTTAGTTTGATGTCATATGTTCATACTTTCCAGTTTCCACTGTAGTACCCT
CATCATCTTCTGTGCATATGAATATTCCAGTTACACCAGCAATTTGTTGATGTGCATTTC
AGGTGACTAATGTAATTTCGAGACGGAGCTCAGTTTCCTTCAACAGCCAGAGAATAAGTT
TTATGTCCATTCGTTCAAGGCCAAGTCAGCTTCGTTTTAAGATTTGCTGCTCGGTATGCT
AAGGTTTTCTCCTATTAGCAATTGTTCTACCAATGTATTGAGTTTATTTGCACATTTTTC
TGTTATGCACATGTGTTCTTCAAGAACCTTCATAGGTGTCTGGAGCAATTGTTTACCTAT
TCCAAACTAGTTTAGATTTTGGAATATCTAGTGAATCAGCAGTAAATAGATAATTAAATA
GGAGTTCATCTTGAGTTCTTGGCATGGTTCTTTTATTGTTCTATTGATGCATAGGCGCCT
AGTTCATTTGCACTTGATCAAGTGCTTTCTTGATGCCTAGATTCATCAAGGCTAACCCCA
CTCTATAAATACGAACCAGACACTTTGACGTAGCTAAAGTTTTCATGGACAATGTGTGTT
ATCTAGTTAGTCAGATAAAGAGCGCAAATCTTCTACCATTTTTCCTGGAAACTAGTAATA
ATTTGCTAGGTTAGACAACACTAAAACAGTGAGAACCAATTTGGAATACTGTTGATATTC
ACCATTATGTTGAGCAGGCTAAGAAAGAGACAGTCGACAAGGTTTGCAACATAGTTAAGA
CACAGCTGGCACTCCCTGAGGGAACTGCTGTCACTGGTGAATCAAAATTCTCTGAACTCG
GTGCTGATTCACTGGATACGGTAATCCCTGTCAGCCAAACAAAAGCAGCATTTCCGATAA
TACGGCGCAATTACAGTGATGCCAAATCTCCTTTGTAGGTTGAGATTGTGATGGGCCTCG
AGGAGGAATTCAACATCACTGTCGACGAAACAAGTGCGCAGGACATCGCAACTGTTCAAG
ATGCAGCAAACCTGATCGAGAAGCTCGTGCTGGAGAAGGCTGCATAAAAACCATGCACCT
CAATTCATCAGCCCTTTCGGAAACGCCAAAGGGCTGCTGCTATGTTTTGATCTCGCAATT
GCGTTTCGGGAGAGAATACGTTCTTCTAAAATTTATGGCCAACTTTGCATTCTATCTGTA
TTGTATGTTCAGTCATTCCTGCTACCCCATTTATTCTTTCCTTGATCATTGAAGGTAGGG
TTTTGTACTCCAAAGGCTACATGAGGGAAATTAATTGAGACCACTTGTTCTGTGCCACTT
CCATTTCATGTACTGTATACTGCTGAAGAAAAATTAATACTAATAACTTGTCAAGAGTCA
CTGGTTCATCCCTCTTGGGTCTCTGAGGAGGCTTACAGGCTACAGCGTTTTCATGGTCTG
AAACTATGAAAATCTGAATGAGATGATGTAATGGTAGATTTGTGGACAGGAAATGCAGCT
CCTGAACTCATGGGTTTGTGTTTGATGTGGATGACAATCTTGTGGTAAGCAACCACCTAT
CCACCACACATCTGATTGAATGAAAATTAGAAAAATATTATGTTGGAGGAAACAAAATTG
GCTTTTTTGAGGGCTAGATAGCTGAAATTGATGGATTTGGATAATCTAGATAGTTATTTG
AGGGTATACGCGAATAAATTAACTACTACAAAGTTAAAAATTTGCTTTAGAGAGGTATTC
CGTGAAAAATTTATATGGTAGTATCTTTTGCACGAAACGCGACGTGTAGTAGCTTAGAAA
ACGTATAGTAGCTTAGGAAACGTGCAAACGAAAACAGAAAAGTGCATGGCCTAAATGCGG
GAATCCACATAATTTCCATTTGAATCATACAAATTCAAGCAAATAAAACCAGAATGAATA
GAAAAGTTTGGAAAACTACAGCCAAAACCTAAGCCAGAACATCTGAAAATGAAAATTGAA
AAAAAAGGAGAAAATATCAGAGGCAGAATATCTGAACAACACAAACCTGCGAAAAGAAAA
>Os03g0238300|Os03g0238300	Os03g0238300; upstream from -3000 to -1; size: 3000; feature type:gene; location: Oryza_sativa.IRGSP-1.0.46:3:7308500:7311499:R
TTGGAATATGAGAACGATAATTATTTTAATAAAAAATAATGTTAAAAAACAACGAGTAAA
TTAAAACAGAGTATAGAGTATAGTGTTTTAGATGTGTTGCAGCTTCAAGTCTGAGAGGGA
AGGCAATCATACCCTATGAAAAATGAATGGGATTTAGTGTTACATGTTCGCGTAAAATCA
TAAAGAACACTGTGATCTATATGTATAATCAAATGTGATATGGAATTAATAACACAAGCA
AGATAAAGCATTAGATATTTAAAAGGTCAAACTGAATATTGACAAACGTATGTGAGATAA
ACAGACAACATATGTTGTGATTTTTTAACCAGTTATAAGAGGTGTGATACCGAACACAAG
TTGCTCAAGTTGAGACCAAAAACTCTATAGGTCTCAACCTCCCTATCCTGAGTCTATATA
CTAGGCACAATACTTAAAACACGTGTTAGAAAAATAGTTATATGTATGTGCTTAGTAGAA
AAATAATAGTTAGTTGTAGATACGAGAATACGAGATGGCCAGATGGATAAACATGTACAG
CTAATTAAATTGGTCTCCACGCTCCATTCTCAGTTTGTTTCTATAGGACATCTTTTCATT
ATAAAAAGTCTTTAAGACTAAACTTTAATTGTTGGTTCTCCATTACCTACAAAACTAATA
TATGGAAAACACTTAATTAATAGAAATATAAATCTGTTGATATATTTTTACATTAAATTA
GTAATTTGATTAATCATTGGCCAAATGTATAAGATTAGATTTTTCCAATGGGTGGTGCAA
CGATTCTATAAACTATGCTTTATGAAGGTCGAAGGCTTTTTTTTTTTTGCTAAAAGGCGC
AATAATTTTCAGGTGTAAATCTTTAAATGCCCTAACTGAGAAATACTTCTATTGGATATA
TAATAAGTCTTTTCATCCATCACGATGAATATAATTTAACAACAAAATAAGATAGAGATC
CTTAAGTAGAAATTGAGAGGCGTGCATCATATTTTTTTAATGATAAATCCCCTCCAGTTT
TGAATAGATAACATCGTTGACTTTTTAACATGCGTTTATTGATCATTTTATTTAGAAATT
TTACGCAATTATGCGAAAATGTAAGTCATACTTAGAATATCTTTACCAAGAAATCAAGTC
ATGGGAAAATAAATAATAATTCTGTAACTTTTTAAATACGACGAATGATTAAATATGTAT
TTAAAAAGTCAATGACGTAGATAGTAATAAATTATGGTACTCCGGACTAAAATATCTCAA
AAAGTTAATCTTATGTCCTTATCGCTGCTAAAGAAATCGGATGTTCTGATTATTATTATT
AGAAAAACTGAAAAGGATTTGGTAAACCTGCACAATAGCATGAGCCAGTACATCTATCTC
ATTGTAACTGTAGTTGAACAGACCTGGCAGATACAAAGATTCCCAACATATCCCTCCCTA
TCCAAATAATCGTGCTTATCTCTTATGTGATTCCGCTTTTTGACCGCTAGACAACATTCA
AAACAAAAGCTCTACTCTCTTATAGCGATGCCCACCCATTTCTCACAAATATCATGCAAA
AAGCTATAAAAATTGTGAAACCTTTTAACATCATTAATAGAATATGCAAAGACCATTCTC
TAAAAGAAGGGTAATACACCATTCAGCGAAAATGGGTCTATATTAGATTTGATATATACG
TACAGAATAAAATCTGACTACAAATAATAAATAGATAATGCTGATGATTTTGATACATAA
TATTTGACTATTCATCATACTAGTTTCGTTTATTTTGTTATGACTTATTTTATTATTATA
CTTTAAACATTACTTATATCTTTGTATATTTTACACTGAATGTTTGAAAGATCAAACATT
ATGTAAAAAAAAAGTCAACAACATCATCTACTAAAAACAGAAGAAATATGCTAGTAGATA
TATTGAAAATCTTATACATATATTTACTTCTAATCCCTCTATTTCCGAATATAAGTACTA
CGTATGTACCAAAATATATTACTCCCCCCGGTTCCATAATTCTTGATATTTTAGATAATG
ACTCAATCTCCAAAATATATCTTTGATCCTGTTTTTCTATTATAATATATACAATCAATA
AATACATGTTTACTTTTACTATAGTATTTTAAAAGATAAATCTATATATGTCATTCTAGT
TCTTTAGACATTTAAATAATTTTAAAGATATTGATATTCAAAGTTACAAAAAAATTGACC
TCAAACTTATCCAGAACGTCAAAAATTATGAAATGAAACCAGAGAGAGTAACTTTTTTTG
GGGGATGGAGGTAGTATTTCTAAGATTTAAATTTTGTAGACAATATAAGCATTTATAGGA
CACTTCAATGTACATGAATCTAAGCAAGCCAAATTTTCAAATTTGACCAATAAGATAACT
GAAAAAAAATGCCTTTTACTCTCTTTGTACTCGAGATTTATTTTTTACTTAAACAACCTA
AAAATGCTTATTTCTATGAACGGAGGGAGTAATAATTTGAGAAGTGAAAGCATGTAGTTC
TATTTTGCATAGCTCTAGCTCTAACTCTATCTCTTCTGGAGCTGAAGTCCAGCCAAATAA
TTTTTAGTCCACTCACCTAAAGCACTATCATAAAATAAACTAGAAATGTGTAACTGGGTT
TAGGTTGTGAAAACTTCACTACAGATCCAACTACTAAACCTAAATTTAGAAGTTCGACCT
TAACTAATTACCAAACAGATCGTACCCCACCATAAGAATCCCTCTACAGTCAAAAGTGCT
TTTATCCTCCGCTGTCACCGTGTCACCGCCAGTCCGCCAGTCGAGAGTCGACCACCCTCT
CCCCCTTTTTCCGCTCACCGCACGCGCCATGCGAATGCATGCATCGATCAGCGTCGATCC
GTCAATCCATCCACCGCTGGTTAACAGTGCGCATGAACATGCGCGGGACGGGAGACTCCT
TTTGTTTGTCACTTTCCGCCCTCCTCGCCTATTTAAGCCGTCTCCCTCTTCCCCGCCTGA
>Os12g0420200|CSP41b	Os12g0420200; upstream from -3000 to -1; size: 3000; feature type:gene; location: Oryza_sativa.IRGSP-1.0.46:12:13100675:13103674:D
CTACGACCTTCCACAGGTGCTCCATGATCAATACAAGGGATGGCTACACCCCAGAATTGT
GTAAGTGTTCGTGATCAAAGCCATCTGTTTGGCTGTAAAACTTAAAATTAAATACCCTTT
AAATTGTTTGACAAACTACAGAAGCACCTCTGAAGATTTTGTGCTAAATTATGAAACCCA
TAGCTCTCTAACTGCGAAATCCTGACAGTGAAAGTTCTGCAGGTGTTTAACCAAAATAGG
TTTCACTGTAGCATATCCGACATACACAAATATCAAACCCAGACAATCTGTATCCTCCCT
TTCTTACGTTCCTTACTCCCTTTTTCTTGAATTAATGTGTGATTCATGTCTGCGACTTCA
TTTTGCAGGAGAGATTTTGTGAGATTTGCAGACTTCTGCTTCAAGACATATGGTCATAAG
GTGAAGAACTGGTTTACCATTAACGAACCTAGGATGATGGCAAATCATGGCTACGGTGAC
GGCTTCTTCCCCCCTGGCAGATGCACCGGCTGCCAACCCGGTGGGAATTCCGCCACCGAG
CCTTACATCGCAGCCCATAACCTTCTCCTTTCACATGCCGCTGCTGTCAGGACATATCGT
GACAAGTACCAGGCTAGTGAATGATATCCATGCCCCTACTATCCAATTCAACATTTCTTA
AAATCTCCAATGTATCAGCTCATGTTCATGATACCTTGCGATTTTCAGGCTATTCAGAAG
GGGAAGATTGGCATCCTTCTCGATTTTGTATGGTATGAGCCACTCACCGACAAAGAAGAG
GATCACGCAGCTGCACATAGAGCCAGGGAGTTTACCCTTGGCTGGTGATACATCTTACAC
TGTTCATCAATCATTGCTCTTACACGGTGTCCGCATGAAGGTTGAACTGAACTTCCACTT
GAAACTTTTGCTAGGTACCTGCACCCGATTACATATGGTCATTACCCAGAAACTATGCAG
AATGCTGTTAAGGAAAGGCTGCCCAATTTCACACGTGAGCAGTCTGAGATGATAAAAGGA
TCAGCGGATTATATTGCGATCAACCATTACACAACTTATTATGTCAGTCACCACGTCAAC
AAGACATCCATCAGCTATCTCAATGATTGGGATGTGAAAATTTCATGTATGACACTTTCA
AATCACACAGTATTAGACCAGAAATATTTGTACCTTTTCAATTCTTTGCCTTCCTAGCTA
ACACATTTTGGTCCTCTATTCAGATGAGCGTAACGGTGTGCCAATTGGGAAACAGGTAAG
CAACAATTTACAAGAAAGGTTGAAAAGAATGGTAGATCATGAACTAAATTCTGGTTTTTA
AACATCTATGCAGGCGTACTCGAACTGGCTTTATGTTGTTCCTTGGGGGATCTACAAAGC
TGTCATGCATGTCAAGGAGAAGTACAAGGACCCCATTATAATCATCGGAGAAAATGGTAA
ATAAAGATAATACTGGAGACCCTTTCAATTTTCGGACAGTGAACAGTACAACTATAAAAG
TGCTCTGCAGAATGAATCTAGGAGCAAAATCTAACAAGAACCTTTTGCAGGCATTGACCA
GCCAGGCAATGAGACCCTACCTGGTGCACTGTATGACTTCTTCAGGATACAATATTTTGA
TCAGTACCTCCATGAGCTTAAGAGGGCGATCAAGGATGGTGCAAGGGTCACTGGGTATTT
TGCTTGGTCCCTGCTTGACAACTTCGAGTGGCGGCTCGGGTTCACTTCAAAATTCGGAAT
CGTCTATGTAGACCGGAGCACTTTCACACGGTACCCTAAAGACTCAACACGTTGGTTCAG
GAAGATGATAAAAAGTGAGGTTTGAGTTGGATTATTATCACTGTTGGCAGCTGCTGGAGT
GCTTTTTTGTTATGCTAGTTTTGGTTGTATGAATAATAAGATGTCTTGTACTAGTTGAGA
ACTTCTTCAGATTTTGTACTTCTAGTATTCTACTTTTTGTACTTCAGATTTTGCAAGCAA
GGATGATTTTAGTTTAATAGATTCAGGACATCTATATATACTGGTGATAAGAGAGGCAGA
TTTCAATTTTTGGCTTGAATTGCCCATATTTGTGTTTTCCAATGTTTTTTAACTTCAAAT
TTTAAACTTTGGAAAGAACTACAGTTTTTTTTAACACACAGGAGCTCTGTGTCCCACTTG
AATAGAAGAAAAAAAATCCATTGCCCCTTAACTGGTCAAGCTTTTACAAACATTAAAATG
ATCTAATAATGGTTAAAGAAAACAACATCCTGGGAGGCTATCTAAAGATCTAGCCAATGC
ACTTTGCTCCACCCAGCCTCGATTGAGTACATGCGGTCTTTGATATCATCCACCAACATA
GATATGTTCTTAAAAGAACTATTAAAGATTCTAGGATTTTTTTTTAACCAAATGGAGTGT
ACAGTGATGAGGAAAACCAAGTTGCAACCTTTTTAAATGTTCAGAATGAATTTGATGCCA
TACGGAAACCCATCGATCTCTTAGGTGAAAAAGAACTACAATACAGGTTGATACTAGAGT
ATCAGTTACAAGATGATTAGATAACTTTTATACCCATTGCAATAAGATTACATTCTTAAG
TATAACAAACTTCTAGTTCTTTATCTATTTTACCAATTAAAAAAAAGTATATATTGATGA
AAATGCCTGTGGACACCATAGCCTCACTTTGTGTACTTTTTTTTTACGGGAAACAATAGG
AGAGGCTACTACTGTATTATATTAATAAATATAATATTTACAGGGTTTATGTACAAAAGC
AATAAAAAAAAGAGTTAGATGTCCCCATCATTTGATCAGAATGCTGCCAAGTGGACAGAA
GAAAGAATGAGAGGAGAGGATCCATCACAGGATAGGGCTGGCTGCCCCATCCACACAAGC
CAAAACAGTCCCAGCACCTCTTTTTTTTTTCTCTCTTGCTTTGTTCCATTAGCACACAAG
ACTGAACCACAAGTTTCAGACAAGGGATATACTACCATCCTGAACAAACAAAGCCCCTCC
>Os01g0551000|Os01g0551000	Os01g0551000; upstream from -3000 to -1; size: 3000; feature type:gene; location: Oryza_sativa.IRGSP-1.0.46:1:20659993:20662992:D
TACACCACTTTCATTATCGAAAAGTAAACCATACTTCTTTTTTTTTTCGGGGGCAAACAT
ATATCCGCACGCATTACACATACGGCTACACATATCCACGCGAATGCGTCCTATTATTAC
ATTTTCCATCAGCCAAAATTTACATTAGGTGCATGCAAACAGTAACCTGCTGGTATTAGT
CGTACCTAAACGAGACAAATTTCGTTGAAATTGACGAGCCGGCCGGTCGCATGATATCGA
TCACGCAAGTCCCACAAAACTTACTTTAACCCTTGGCAGTTGGTACCGAGTCACTGACTG
ACTGAAATACTGGCAGTGGCAAACTGACGTTTTGGCAACGGCAACGAATATATCCGAGAG
ACAAAGGGTCAGCCTTGGCTAATCAAAACGGTGGGAAAACGAATGGGATAATATGGAGAG
ATCTCGACAGGACGCGAAAAGCAGGGCCCCCGTACGTCATCCTGGGACGAAAAATTCTCC
CATGGCAGGCCTGAGTTTAGTTTTAAAAACATCACATCAAAAAAAATTTCATATGCATGA
AACATTAAATATAGATTAAAAACTAATTGCATGGTTAGGGGAGAAATCGTGAGACGATCC
TTTTAAGCCTAATTAGTCTATGATTAACCATAAGTGTTACAGTAACCCACATGTGCTAAA
GATGGATTTATTAGTCTTTAAAGATTTGTCTCGCGGTTTCCAGACAAGTTATGAATTAGT
TTTTTCATTCGTGTTTAAAAACTTCTTCCAACATCGGTCAAACATTCGATGTTACATCTA
AAAATTTTCTTTTCGCGAACTAAACAGCCCCGTTAACAAGTCAGCATGGGCTTAGCGTAT
GAAAGAGCATCGCGTTTGGTGGTCGCCCATCACGTTGTACGCTCAACAGCTCAAGAAGAG
TGGCGGATCTGTGGGGGGTGGTTGATTCACAACAAGCTTGTCCATTTCATTCTAGACTCC
AATACTGATTCGTCTCTCCGAACGGAACAACGCTATCTGTCACTGTATAGGAGGATCACC
AGCTTGTCGTTATGAGATTTTTACAGTATAATAATACAGTTTTAGTACTATTGTATAGTA
ATATTCTTTTTATGGAATTTAATTTGTAATAATGGTAAAAAAATATAATTGTTGAATACT
TGAATCAAAATCTGACATAGATAAATGGATTCATAGGTACGGTGAATCATCTCAGACGGT
ATTGATAGGAACGACCAGAATTAATTAGTACTCATATTGTCCTTTCATGCTAAAATATAA
GATATTAAAGTAAACTAGAATACATCTTATCTTACTATTACAAATTTAAATAGTCTTAGT
ACTAGAATTTATAATATTAGGATGGGTTTCATTCAATACTAATAACTTATGTTTTGGGCC
GAAAGAAGTAGTAAGGATCAAAATACTACACGGTCGTCTGCATACAGTTATGGATAGCCA
AATGGTACATCCCGGTCATTTCCTATCATTATCGGAAGAGAATTGACATATCGATCCGTA
TCTTTTTTTAAATGCTCTTGCGGATCTTTGAATTTTATACGTGAATTCAGAAAAAAGTTA
AAAGAAATAACATAACGTAAATAGGAACCTGTAATAATTAAACAGAGTAGAATTGCTGGA
TCTATATCATTGCGGGCAAATCAAGTGGCTTATATGTTTGGGAGTCAACAACAAGGGTCC
AGCTAGACTGGTAGTCTAGAGCGCATATCCGTAGTGTGTGTGACGCGACTATGTAAACCC
AACAAACCATGGACGTCGATGACGACGAGGTGGAACGACTGATGCTTATGCTCACGCTCA
GAAATAGTCGGAAACAATATCATCTCTTCGAAAATAATTCTTTGACTATTTAATGGTGAT
TGTAATATGGTGTTAAAATAAATTAGAAAATTAAAATAAAATTATGCATCAGTATAATTA
AAAACGTTCAGCGAAGTGAACATAACTTAATTAGTTTGGTGTCTTGCGGTGAAACAAGTC
TATCTAGTTTCAAATTCTAAGCTTAACATGGATGCTCGTATTTACAACTATTTATTTTTT
AGTGGTAAGCGACGTATCTATCAATAATATTTATGCTCTTATCGTTGTTACGACCCTCCA
GGGTTGTAATCTTGTAATTTTTTTCCTACTCTATCAATAGAACTTCGCACCGTCTCGTAC
GAGTCGTTAAAAAAAATAATATTTATGCTCTTAATAGTAGGCGACGTACCTTAGTGAGGT
GCTCGTAGTGACTTCGTCAATATCAAAATATATCAGTCCAGTCTTTTAAAATCATGTGTT
GTCCTGCGTTTTTGACTGTGCTTCTTAAAAAAAAAAAAAGAAGAAGAACAAGACCAAGAA
GCAACGTTCGAAAATGGTATCACTTATACGTTAGACGCTGCTCCGTCGTCGGTAGAGAGT
TTGCATGACCGACCTGTAGCGAGAGCAAAGCTAGAGCAGTTACGCGCCGTGCCTACCCGT
GTATCACCGCGATGAGGTACAGTACGTACCTCGCTACCGACCGACCGACCGACCGCCGCG
CGCGTACTGGCTACACACACATACGCGCGGCGACAGCACGCACGGGGCACCGCCACCGCG
ACGCGACGCGCGCGGGGGGAAAGCTACCGTACGCGTACGCGCCCGTCCCTTCCCTCGCCG
GTCCGCATGCCGCTGTCGCGTTGAAACCTTCAAACGCCGCCCTCTCCAACTCCAACAGTG
GAGCGCGCACGCACGCACGCTGGCTCTGCTCTGTGCCGTGCGCATCATTCCATCGGTTTC
TCCACCCAGCCCGGCCCAACCCCAAGTCCCCAACCCCCGCTCGTGGTTGGAAATTTTGGA
CTCCCACGACGTCGCGGTCACGCACGACTCCCATTTATCACGGTCACGCGAGCCCCCCTT
CACACGCGCTACACGCTCCTCCTCCCACTCCCCGCTCCCCCGCACCATTCGTCTCGTGCA
AGTGCAACCAGCCACTTGCGTGATGATATATTGACTGCTCCATCTCTCGTCTCGCGCTTC
>Os02g0710900|Os02g0710900	Os02g0710900; upstream from -3000 to -1; size: 3000; feature type:gene; location: Oryza_sativa.IRGSP-1.0.46:2:29448939:29451938:D
ACTCTAGAAGTGCTTATATTTTGGGGCTTAGGGAGTAAGAAGTATGCCTCTGGATTTCCA
TGTTCGTGTATCTTATTTTGTGGTAAGATGGGCCAGAGCGTTCCTACTGACTTTTTTCTT
CTTTCTGTTCTTACAAACTAGCATATCACTGCAGAAAATGACCCATCATTACAATTTGCT
ATTCTTGCTGTTATTACAATAGCTAGCATATCATTGCAGAAAATGATGGTAATAACGGGT
TAATGATAATTTTATTTAATAAAAATCCCAATTCAATGGGTAATATGCTAGTGATTATAT
AAAATGCTATGGTGAAAGCCTTCAAGGAGTGTGCTGTAGTTCTCAAGGCTGCCTAATTGT
CCAAAACAAAAGATAATGTATCTGGTACTTACACTTGAGTATTTGATATCCAAACCTCGT
TGCATAATTCATGTCTTTCTTATTTTGGTTTCAAATTTAACATAGTTAACATTTGTTTGT
TAATACAAATTACTGCCATTCATTACAGCTATATACCCCTTCCACGAAATCGAGTGATGA
TGATACAATCTCAGACGAGAATTCCGCTTCTGAAATATTTATGGCTCCCCATGTTCTTGC
TATGTCCGCTACTCCAATCCCAAGAACGTTGGCTCTTGCTCTGTATGGGGACATGTCCCT
TACACAGGTATTTTACAGGCTTATGGCATATAAGGCTTCGTTCGTTTCTTCTGTTTGGTA
GTTGATTTTCTGCACACGCCAAACGAGAAAGCTCATTAGTACATGATTAATTAAGTTTTA
ACTATTATAAACTTGAAAAATGGTTTTCTTTGATTTTTTAAACAACTCCTATATAGAAAA
CTTTTATAAAAACACAGCATTTAATAGTTTAAAAAACATGCTAACAGAAAACGAGGAAGT
TGAAGTTTTGAGTTGAAGAAAAGAACATAGCCTAAATTGAGTATTCCAAATACTTACTCA
TTGGAAGTAAAATGTCATATCGCGTACTATGTGGGGCACAGGGTGAAAACTACATACATC
GAGGGACTAATTCTAGGCTAGCACAATTATATCTTTAACAACTAGTAGTCCACCCTGTTG
TTTTCCAGGATCCGCTACTTTATGACTTCACATATTGGATAGGATATAGTGCAAAAATGT
TCTTGCATTTTTCATTTTTCATGTTCCAGGACCTGTTACTTTAACAACTAGTAGGGTCTT
TCATTTTTCACAGCTATTTCAAATCTTTACAATTGTGATCCACGTTTCTTATAGATCACG
GACTTGCCTCCAGGAAGACAACCTATAGAAACTCTTGCTCTTGAAGGAAATGATGCTGGT
TTTGAATCTGTCTTCCAGGTGATGACATGACTTCATTCAATATTTTTTCTTTTTGTTTCA
GATCTTTGTTGTTTTCCTTTTCTGTCCCAATCTGCACTTGGATATGGTTGGGATCAATTT
GCTTATCATTTTTAAATACTTATGGCTTGAAGATGATGAGTGATGAACTGGTTGATGGAG
GCAAGGTCTACCTCGTATATCCTATCATAGAAGAATCAGAGCAGCTACCACAACTTCATG
CAGCAAAAGCCGAGTTTGATTCCATAAAGCAAAAATTTGAAGGTTATCCCTGTGGGCTGT
TGCACGGTCGCATGAGGAGCGATGAGAAGGATGGAGCCCTCAGCAGTTTTAGATCCGGGG
AAACACGTATTCTCCTCTCAACACAAGTGATTGAGATTGGAGTCGATGTTCCTGATGCTT
CCATGATGGTTGTCATGAATGCTGAGAGATTTGGAATGTCTCAGCTGCACCAGTTAAGGG
GTCGGGTAGGGCGTGGCGAAAGGAAATCCAGATGTGTGTTCCTATGCTCCACTCCTAGCG
CGCTGCCAAGGTTGAAGGTGCTTGAGAAGTCATCCGATGGATTCTACTTGGCTAACGCCG
ACCTGCTACTGCGTGGCCCTGGTGATCTACTCGGCAAGAAACAGTCAGGGCATCTTCCAG
AGTTTCCAATAGCTAGACTGGAGATTGATGGCAGTATTCTACAAGAAGCTCATCTTGCTG
CACTTGTAAGTTCATTTGCTAAACCCCAATTCGTGTTGCTATTAATGATCAGACAACTCT
TCTATCACTGTAGTATATAACTTATTTGTTCATGTTTTTAAAAGTAGCTTTTTTGTGGCA
GAACGTTTTGGGAACAAGCAACGACCTTGCACAATTTCCAGGACTAAAAGTTGAGCTCAG
CATGAGACAACCGCTGTGCATTCTTGGAGATTGACCTGTGATCTTTACTGAGCAGACAGT
GCAGTGAGAGTGTGACACTGAACAGCGTTGTAGTGCTCATTGGGCAAAGCTTTTGCATTC
TGGCTTGTGCGGTGCAGGTGAACAATCCTTTTTCAGATGCTGGCAAGATTGCAAGTTACT
ACTAGTAGTATTTTATCAAACACTTTTTTTAGCAATACCTGACCAGTGATAGATGAAAAA
AAAATCAGTAACATAATTTCATTATCATCCCAAAAATGCTTTCGCCAATTTGAATGATTT
CCTTATTTATCATGGCACAGTTTAAACTGCACAAACACACTAGCACTACTCCTACGTTTT
TACTGTACAAGCTTCCCGCCATGACGGTACTGGCATGTTTGATGTGACGTGACGCTCGAT
AAACTCGGTAGTCGCCGCACGAGACTTCCACGTGCGGTCTAGCACACGCTCCTCTCGCTC
TTCCAGCGCACCACGCTAGCCAAGGCGTGCCATGTGGATCTTTTTCCACGTGTCGTATTT
TCATTGGACTGGTGACTCAATTCGTGACGTTCCTGCCACGGTCTTCTTCTCACCTTTTTC
ACATGAGCCCTCAATTTTTTCTACATATTCACCAAGAATCCAAAGCACCTTCAGCAGCAA
CGCACAACTCGAAATCAGAAAAAACCTTTCAGGGTCATAATCGAAAAAACTCCGAACGCA
AGAAAAACAATCACAAAAATTGCAAATATAGCACACGCCCTTCTCCTCCTCCTCCTCCCC
>Os02g0815700|OsCttP2	Os02g0815700; upstream from -3000 to -1; size: 3000; feature type:gene; location: Oryza_sativa.IRGSP-1.0.46:2:34934314:34937313:D
ACCGGCCAAACGATGGAGCTCTATAGTGTCCAGATTCAAATGTTAGGACCGAGGAAGAAC
AGCACAACAACACTAGCCAAAGGTTGACGTCTAGACGATTCACATTACATGATTATGTAC
GCCTAGTAGAGCCATGGACGTTGTTCCCTTTTATATCTCAAGTTCAAATCCTAGGATTTA
TCTAAAACAGTAGAGCCGACAATAAGATAATCAAGATTCAGTAGGCAAAATCGAGAATGC
AAAATTGTGCTCCATAAACTTAGAATCATTTCACCTTTATGGGAAGACAACATCACAGCA
TTACAGTGTGGCGCAGGATCGAGTAGTTTACATCTGTGTACAGATACAGATATCACAGCA
CTCGTAACGGCAGTGCTAAGATCAAAAATACTATTCAACTCTGGTGTCAAAACTTCTGAA
GAAACATGAAGCTGCTCTTGATATCTCGTTTCAACGATATTAGCTTTGTTGCTTATCCTC
AACTTGAACTTTGCTGCCTGCTCACATAATGGTAAGCATAAATCACGTCAAAATCTAACA
AATGGCAGCAAAAAAAAAAGGTGAATAGCACATTAACATGCAATAGTTGCTATGGAGTAT
CAATCAAATTAACTGACGAGTGCGATTTTGACCAAACCATACACATTGACCATGATGGCA
GGAGTTTACAAACACAGTAGATAGCCACCAGTGGATAACTCTTGCACTACCGATTGTCAC
AAGAAAGATGCTCACTATGTCCAAATCCACATAGTTCAGGTGTATTATTCAGAGCTTAAC
TAATAGTCCTTTCTTATCTCTCTAGTCTATAGTAAATTACCAAGTGCAATAAATTAACAA
ATTCAATAGATAACTTTCTTGCATTAAGGTATGCTCTATCATAAAAAAAAAATCACTCCA
ATCTTGGTCATCAAAGAATATATCCTGAAGTTCTATAATAGTTCTGAAAAAAAAAAGAAT
TGATTCTGCCTTTATGCTAAGGACATTTCACATTGAAAAAAAAAATCACCATGTTGCAAT
TAAGCAGAGAATTATAACACCCACTAACATAACAAGGATTTCCTTGTTGATTTAAAATGA
TTGACAAAACATATAGATATGCCGGTAATATTGAAAAATTCAGAATGTAAGAGTTACACA
AGCATTTCGCCCCAGTATACAGGGGAAAAAGGACAGACAAAAAGGCCACATGTAAACTAC
TATGAATTTGAGTAATTACCAATCCGAACTCGCAGCTTTCTCTCTCCAGTAGAGGGCTTC
TTCTTCATGTAGCAGCTGTTCCAATCACCTCCATCCTGAGAGTAGTAATCCATTGGGTAC
TCCCCCCCAAAGTCCTTGTCAGCACAACCACCATTGCTGCAACCACAATCTGTGGAAGTT
CCTGATCCTGAACAACAACCGGTGGCATCTCCACTGCCACATTCCCTACTCCCCTTCTCC
CACCATCCAGGAACATAGCCCAGTGCAACATCAAACTCGAATGTCGTCAGCATTGGCTTC
TTGAATCCTTCACCCCAGTCAATCGACAAACGTGGGCATGCAATCTGCACCCACGCATCC
ACCGAATCCCCAAACAGCTCCATCCTTGCCGGGGACAGCTCCGACATGAGCACTACTGTG
TGTTCCAGCCCTTTCTCCTCCAAATGCTCCACCACCCTGTCGAGAACTTTTACGCTTCCC
TGCCGCCCAAGGGTGCCTAGTATAACTCCCCAACTCTTGGCCTTCCTTGCTGCCAGCACC
GCCTCCTTCCTCGCTTGCTTCATCCCGACATGGTCATACTCCTCCAGCACAAGCACACCC
AGGAATGGATCAAAGCGGTAGGCCTTGACCCCGGGATTGGCAATCATGAATGCCTCGAGG
TGGAATCTCCCGTCTGCGACGAACACCACCGCTCCGACCCCCTCGGACCTTTTCAGGGCA
GGTGCTGTGCACCCAAGAACCTCGCCGGCGGACAGCGGCTTTGCCTGTGGCACGACGATG
CCCTGGTAACCATCGTGACTGAGGATCTCACGCGCTGCGTGAACTGCCGAAATGAACTGC
ACGGTGCCGGCGATGGCGAGGCGGGGCGCATCGGCGGGGTCCGGGAAGGCGGCGCGGACA
GCGTCGGCGAGGCGTTGGGCGTCGACACGGATCTCGACGAAGACGTAGAGCACGGGGAGG
AGGGAGGAGGTGACGGGGACGAGGCAGGAATGGCCGTAGTGGACGAGCACGTCGGCGGCG
AGCGCCTTGGCGGGGCGGTCGGCGAGGCAGCACGCGCCGTAGGTGGGATCGGCGAGGATG
AGGACGTCGTTGGAGGGGTCCGGCTCGAGGAAGGGCGCGAGGAGGTGGGAAAGCGGGAGG
GAGAAGAGGAGCAAACCCTCCGGAAGCTGCAGCGCGGTGCGGCGGGCGCCGGAGGAGCGG
ATGCGGTGCGCCGTCTTGGGGAGCTCGAAGTTGTACGCCGCCGGGAGGAGGCCGGTGGCG
GCAGCGGCGAGGGTTGGGTCGGAGAGGATGGAGGGCGGGATGGGCGTGTGGACGAAGCGC
TTCGGGGGCGGCTTCCTCTTTGGTCCCTGCGCGGCGCCCGTGGCAAGTACCAGCGAGTCC
GAGGTGGAGGTCTCGCCGGCGTCCATGGCGGCGGCGGCGGCGGGTGGGAGAGAGCGGCGG
CGGCGCGAGGGTTTGCTTCTCCAGAAGGAGAGAAGAGAGGGTATCAAAGGTTCACGAAAT
TAATTGGGCCGGACACGTGGGCAGAAAGCCCAGGAAGGCAAAAAGCCCACGCGGTCCGCG
ATCGCCGTCCGCTTCGCGCTGGGGCCCAATCCAACGGCCCATCGCTTTCGATCCAGGGAA
AGTTGCGTGGCTAACCACACATCCACTCAGCCGAAAAAAGTGCAGGCCACGTGGAAGGGA
GGCCAACTCCGCGGCCATTATCCATTCATCTCTCAGCCCCAAAATTTCTCAAAATTTTCC
AAAAAAGAATTTTAATTTGATTTTACAATTTCTAGTCGACTTGTGAGCCGGGAGAAAAAC
>Os03g0114800|Os03g0114800	Os03g0114800; upstream from -3000 to -1; size: 3000; feature type:gene; location: Oryza_sativa.IRGSP-1.0.46:3:839577:842576:D
CATGGGATGGGGAATTGCTTAACAAAACTAGTGAAGTCAGTGTAGAGATGACCCCAGCTT
CTGAAGGTAAATGGTCTGTTGATTTATGCTGCATAAATATTCCAAAATGAATATTATCGA
TACTTAGTTCTGACATTAAGAAAGAAATATATGTTGATGTTTAGTACTGGTATGTCTTTA
CAATGCTTATATATGTCATGAGACCAGAACTAAAGTAGTGGGTCAAACTAATTCTTACAA
ATATTACACCTTGGTTATCTTTCTACATATCCGTGTATGAAAACCTGAAAAGGTAAACAT
AACTACAGTCCTATACCAAATGAGAAAACTTATAATATATAGTGTATACCACTCTAGTCC
CTAGCTACAAGTGCTGTCAGTATGCACAAATAAAGGGCAACCCCTATTTGAAGGAGGGAA
AATTACTGCTAGGCTCCTAAGCCCTTGTTTAGTTCCAAACTTTTTCTTCAAACTTCCAAC
TTTTCCATCACATCAAAACTTTCCTACACACACAAATTTCTAACTTGTCCGTCGCATCGT
TCCAATTTCAACCAAACTTCCAATTTTGGCGTGAACTAAACACACCCTAACTTTAGTTTG
GACGTTCTCTACGGTTCTCATATATAAATTGTTGATACTATTATCTACCTTATTTTGTAT
CTGTTGCTATCAACTGAAACTACATCCTCGTTTTGGTGATTGGCATTTGGACCCTTGCTT
AGAATTGTCACTCACTAATCACTATACCTTCAAAAAAAAAACCAGGGGCACCCTTTCTCT
TTTCAGATTTACTAAAGATTACTCTGTTTTACAGGTCATTCAACCTCACAGCCTACTCAC
CATCTTCCCATATTCTTCCTCCCTGAAATAACTAACCAACAAACCAAAGCTCACTGATTC
CAATCCTCACAATGCTTCTATCCAATCTACCTAGTCCTTACCTGAACTATCTCATCCCCA
ATAGCCATATACTTATCCCAGATAACAACATTTGCTGAACAAAAGCTGAATAAAATTGTT
ACATACTATGTCTGCTGCTCCACATCACAACCTACTTTCCATCTTTCTCATTTCTCTCTT
ACCCTTAAACTAAAGGAGCATCCAGTGCTGAAAATACCTAATTCATTCCTTCACCTTTCT
GAACAATGATATAATAAGATCAGACGGTTGATGCTGCAGGCACCATAATCTGCTTACGTG
CAGCAGCGCGTGCAAAACTAGTTCAGCCATCACATTCTCAAGGCTCTTGAGGGAAGCATG
GCCCCTTAAACTACCTAAGCCAGCTCTAGATCCTGCGTGTGTACATACATGTGCAAGATC
CACTGGAACTGCATTTAGTCTGTATACTTAAACAATGATCAAAACAATCTAAACCTAGAA
ACCAAAAACCTTGTAACAATTCACCACACATGACACAACCAGAAAAAAATTATTGCCAAT
TCATAATCACATTATTTATGCCAATTTAGCTTGTCTACCCATACGAAGGTTCTGTCCCAG
ACTAACTCTGCAAACCAAATATCTGAATCATCCACCGTAAACTGAACACACATACAATAC
TCAGAACTCAACATATTATGTCGCAAAAGTTAATTCGTGCAACACATCAACGATGCCATG
ATTAAATCTACATTTGCCCCACCACTGACGCGACTAAATCTGCATTCACCCCGGGAAAAA
AAACAGTTAACCCTAAACAATATTCTACAACCGAATCGGAAGTTTCGGAACCTTACCGAG
GATTGGAGGAGGCGAGCGATCCGCTTGCAGTTGCATCACTTTCGTCTCACCCCTCGGCGC
ACTACCAAATGAGGTACCACCTGCGGGCACCGCTGCTCCTCCAACCGTCGCCCCTTGAAG
CCGCCGCATGTACATCCGCCCGCATTGCAAAGCGCGATTAGGGCATCGCCTCAAGGATCC
ACAAGGGCGATTCGCCGCAAGCTAGCGATGGAAATCGGATGCACCTACCTAGCAAACGCC
CGCGGATGATGAGGACGCTCCGCTCCGCTCCGCCGTCCATCGCCTCCTCTCTCCCTCTCT
CCGCGATTCGATCTCACCGGCGCCGTAGCGCGCGGGGCGGTGGAGAGCGTGGGATTTCTC
CGCGGGTAATCCCATTGGATAAACATGGCGCGTTTGGGTGGTTCGGTCGCCGCACCACGC
AACGCGACGCAGTGCGCGTGAGCGTGCCTAACCGTGTGCGACTCGGCTCGACAAAAAACC
AAACCAAACCGATCAGATCGCATTAGAAAATCTCTCCACCGCTTGCAATTGCAAGCTAGC
TGCAGTGGTTTAGGGCCAAACATGCTGCAAGTGTGAGTCGTTGACCAAAGAGGACATCAC
ATTCGGAGTCAGAGATGGGAGACCGCCAGTGCAATGCTAGTCATAACCACGATATCAAAT
GCCAAGGAGTTAAAGAAATGATAGTTTGTGAACTTGTGAGTTGTGATGGACCGGGACGAT
GAGCATGGGTGAGCTAGGCATTGTCTCTGCGCAAGCACTGGTGTACTGCCGCTGCCAGGG
TAGATCCACCGTCCATTGCAGTGGTCCATTGCCTCACCCTCACGCCGACACTTGTTTCAC
AGCGCGCAAGTAATTAACTTGATCCATTCGAGAGAGATGAGGAGAGAAAACGAACAAGGT
TTGGTTGATCTGGCACTGGGGCACCGCCAATCCGATGTTCGTTCCACCGACTGTACTACA
GTACTAGTATCCGGCAGTCTGGCTACGCGGTATACTACTATACGTGTCATTGTCTACTCA
ACCAAGAAAAATTCGCTGACGATCGAGAATTGTGTCAGTAACGCCGCCAAGCAGAAGAAC
ACCCAAAATCCATCTATCCACCACCACTGGGACTGGATTCATCATCATCAATTGGAAGAA
ATCTCAACCACCGTTGGGCCCCAGACGCACAGACACACACAAACACATCCGATCCCGCGG
CGGCAGCAGCAAGCGCAATTCCCATCAACCGCAAGTGCGTGCCGGCCGAAGATTTGGCGC
>Os03g0129300|GADPH	Os03g0129300; upstream from -3000 to -1; size: 3000; feature type:gene; location: Oryza_sativa.IRGSP-1.0.46:3:1659306:1662305:D
ATGCAGCTGTTGATTGTGTGGGATTGGCTTTCCGTGGAGCATCATCAGCACTATTTGGAG
CCAAATGGACGTCTTCTTCATCATCTTCTGAAAGAACAGAAACATCCATCAATGTAAGGG
AAAAATCATGTGCTGGAATCTGAAGAACGTACCATCGTCGTCTGCAATAAATGACTTCGA
TTCATGCCATTGATCTTGTGGCAAGAGCTCAACAGCAACTATGTCTCCATCAAAAGCCCT
ATTCATGTTTGAACGGCCATGAATAACAATCTCATCACCAATGCTCTCACTTCCAACGTA
AGCTTCAAATGGATTGTAACGATTAACTCGGAGCTTCCCTTGATGATAAATTCCACACCG
CAGGCCAGCTGTAATTTCTGACATAGGTTTGTGCTGCAATGATAGCAAGAAATTACATAT
TCGTATTTGATACTAGATGGCCAACGCCAATAAAACAAGCACAAGTCAACAGTTTAAATT
TACTGTACCTCACTGTAAATTACTTTCTTTTTGGACGGTCTAAGATCTTCTACATCTTCC
ATTGTGACATCTCCACTAGTTGAAACAACCACTAAATCGAGCAAACCAGGCTGTGCAAGA
GATCGTACATATGATTCCACTGGAACCAGAAATATTGTGTTGTGATTACCAGAAAAAATA
ATGTGTCCAATATTTGAAAAGATCCAGCTAACATTTTTGTAACATCCATAATTTCACCTG
TCTCAGCATTAATGCCTTCTTCAATAGCTTTCCGTTTGTTATCTCTATCATTTGTGATCA
GCAAAACTTTCACATTCTCACCAAGATGACTTTGGTACCAACGAGTAGCCACACGAATAG
CTGAATATGAATGACCAATCAAGAGAAAAGAATACACAAAAGTACTTCGAGTAGTGCAAA
ATATGAGATAAAGCAAGCTAACAGAATTATTTGGTACAGTACCTCTATCGTTGCGATCAT
TCGGGCTCTCTCCAACCATCTCTTTGACATATGTATCCCTGTTTTTTTTGGAAGAGAATG
GTGTAATTTTAAACCAAGAAGACCACATAAGGAACTGGAAGTGCACTCATTTTCTTCGTG
TTTAAAGAAATTCGCAAACATAAGGACGGACATGTACTTGCAAGAGATAATTTATCACGA
GAAATTTGCAAATTCTGTTGGTCTATACAAGCTTGCTGACAAGAATATTTTAAAAAAAAT
TGCAGAGTGTAGATGTGCAACAGTGCATGCATAGAGAGACTTTTGCAAATATAATCAGGC
AGATAGTGCTAAAATTGAGGTCCGACTGTCATGCACACCAAAGATATGCTGTTTGGAGAA
GAAACATTTGAAGAGGGATTTAGGAAATCCCAAAATCAAATTAGCCCAACATAAATCTGA
GTCTGTTAAAAAGGAAATGTTGTGGAACATCAGATGCAGGGTAGAGCTTTTAGATAAATC
TTCTCCCTAGTACTAGCAACTAAAATATACTTCTTTAACAACCTAGGTGGTTTCTCTACC
CCATTCTGTTAACCATAAATTTAAACATGTTTTGGTTCAGATAAGAACTGAGCAACTGTA
TACTGGATTCACATAACAAATCATAATAGCCATCGAGCAAATCCTAAGGTATCGAATGCA
CACCTGTGGTGCTCATTGGTGAACACGAAGAACCTCCTTGCCTTGTTAGAACACAGGGCC
TTGATCCTGTTGAACACTGCGAGGTTTTTATTCTTCACCTCATCCAACACAACCGATAGT
AGGACAACATCGTCAATCGCTGGATTCTCCAGCAAATCGATCTGCAGCAAGCTCTCAGAA
CATCAGCCTCCGGAATCCCTAGCTCTACTCCCTACAGGCAACAGGAGGGGAAAGGCCAAC
CTGGTGGAGCACGACGTTGGTGTCGACGACGAGGATGGCGGCCGCGTCGGCGGAGAGCGG
GTGCTCGACCGCGCCACAGGTGGAGCAGGAGGCGGCGCCGCAGGAGATGTCGTCGCGGAG
GTAGTGCTCCCTGACCACCTGCGGGAATGGGGGAACTCCGGGTTAGCTAGGGTTTGGGGG
CACCTTCGCCGCGCGCAGGGTGATGCTGCTGCCGAGTAGTTACCTTCTGGACGCGGCCTG
CCCTCGTCTTCTTCACGAAGGTCTTGCTCTGCAACATGTCGGCGAGGTCGGGCGTCGCAG
GCTAGCGGCGGCGGCGGCGGCGGCGGCGGAGAGGGACACGGCGTCGCGGCGGCCCTGAGC
GTGAGTGAGACGGCGCAGACCGGCGGCGGCGGTGGAGAGAGAGAAGAGAGGTTTTGATAG
GTTCAGTGCCGTGGGCCGTGTTAAGTGGTGGGCTAGCCAGTGTTTGGGCTTTGAGCCCAT
TCGATGTGGCTTTGGTAGTTCGGTTTGACCGCTGACTCAAACCTTCTCCCTTCTTAAATT
TTTTGAAAATTTTGGAATTATAAATGGCACTGCTCAATTTTGGCAGGGACAAATTTATCT
CATGTTCAGTTTTGGTGGCTTCCATTTTTCTGTTGAAATGCCCATATAAGGTACACCCCA
TTTTGCCTGTCCAGTGATCTTCTTTTATCAAAGAAAAGATATATGCATACAAGCTACACC
GATGGCCATAAAACCATGAACCACACAGAGCACACAAAAAGAATAACAGTATGTCAGTAT
CCTAATCCAAACAGAAATGGCGAAAAAAAAAATGAGCCCCACGCAGCCAGGCTCTCACGT
CTCACCAGTTTAAACTACAGGCTGACACGGTGACAGCAAGCGCGCAGGCACACGGCGACG
AGAAACAAAGCAGCGGAGACAACGACGGGAGCGCGCGCGGGCGCGCACTGCAGAGAGATA
TTTGTGTTTCACCTACGAGGCCACCAGAGTCACACACACGGATATCGCCTTCCGCGCAAC
GGGTGGCTGCGCGCGCGTGCAATCGCCTTATCCCCGGTCTCCACGCCACAAAGCCCCAGC
GGTGATCGCCGCGCCCTCCGCGCCAAGTACATATACGCGCGCATCCGGCCGCCTCGATCC
>Os05g0501700|Os05g0501700	Os05g0501700; upstream from -3000 to -1; size: 3000; feature type:gene; location: Oryza_sativa.IRGSP-1.0.46:5:24693226:24696225:D
TGCACAACTTGGGTTACGTTCTAGATCATTTGGGAACTTAAGTTCACTGGATGGAGCACC
CTACACTGAAGAAGCTAGAGTTTCACCAAGTCACTGCAAAGATGCCTCAGAAGACTTTGT
TCAATCCAATGCACAATCCCAGTGTCATTGTAGAGATGAACATATCAACAATAGTTCAAC
TGATGAAATTTCACAGTGTTGTGTGGAATCAGGAAATGACTGCCATCATTCAGATTTTAC
ATCAACTGCAGCAGTGACACCGGTTAGAAACAGTAACTCGTTTGATGATCCTCCTAGTCT
ATCACATGATGCAGGCAATACTGAAGAGATATTTCAACAAATTGATAAAAGAGAAGTTGC
CACATCAGTGAAGAATTGTGAACCTGAACCTTGTTACCAGAATTGTTGCACGTCGTCGCG
AAAAGAATTCAATGTTAGGAGAATTGAGAACTGGATCAGCCAAATTCCTGATTCAAATGA
CATAGCTCCATATGAACAGGGGGAATGTTCAAGTTCTGCGCATTTAATGAATTCCAAACA
AGTCGATACTATCAGAAAGCTCAATGCTAAATCTCCTCTTGGCATGGAAACTGCTTACAA
CTACATCGCAATGCTGAAACCATCATCTTCCATAGCACAATTGTCTAATCTTGGCTTGGT
TGCAATACCAATTCTCAGTGCATTCAGTGATTTGCGGCTGCTGAACTTGGCAGGGAACTC
AATAAGTATGTTTCTCTCTAGTAGTGTGCTTTGATTTTTATGTCAAGTTCCTCCTACCCA
TTGGTTTTTCTATTTGATCCCTCATTGAATTTTTAACCTTTCTAAACCAGAATTACTTGT
TCTTCTTTCAGTAAGGATAACTTCAGGAGCACTTCCGAAAGGACTCCGCATGTTAAATCT
GTCAAGAAATAACATATCAACCATTGAAGGCCTAAAAGAGTTGACACTACTTCGTGTCCT
GGACTTGAGTTACAACAGAATAACTAAAATTGGCCATGGTAATCTTCTCATACATGTTTT
CAGTTTCAAGCCTTTTTACATGTACTATTATTTTCGTTTTTACAAGAGCATATGTACTAG
TCTTATGGCACAATGTTTACTTCTGCTGATTATACTAGGCTGTAACAATCTAGAGCAACA
GCCTCATTTGATATATTCTCCCCTCTGTCTTAAAAATAAACCAACCTCGTATTAGGATAC
GACATATCCTAATACAACGAATGACATAGAGTATGTCCAGATTTATAGTATTAGGATATA
TCACATCTTAATATTAAGTTGGTTTATTTTAGGACTGTGGGAGTATACTAACTAGGTTAT
TGGTTTCTGTTTCATTTCTCATATACTCTGCAGGCTTGGCCTCCTGTCCTTTCCTGAAGG
AGCTGTACATCGGCGGCAACAAGATCAGCGAGGTGGAAGGCCTGCACCGCCTCAAGCTGA
AGGTGCTCGACCTGCACGGCAACAGCCTCTCATCCTCGAAATGCCTCGACCAGCTCGCCA
ACTGCGGCACCCTGCAGTCGATCACCCTGGAGGGCAACCCGGCGCAGAGGAACGTCGGCG
ACGAGCAGCTCAAGAGGCACGTGCTGCGCCTCCTGCCGCACCTCGTGTACTACAACAAGC
AGGCAGTGCGGTCACGCCGGTGCTCCAAGCCCCAGGGCGGCGGCGGCCGCCATGGCCGGG
CCGTCGACCTTGGTGGCGGTGGTGGCGGTGGCGGTGGCCGGAGCAAGAGGCTGGAGCTGA
GGCTTCCCCGGAGGTCGGCGTGCGCCTCCGTTGCGCTGAAATCGTCAGGGTGTCACCACC
ATGTCAGGGCAGGAGCAGCAGCTGCAGCTCATGGCTCGGTGAGGACGTCGAGGCAGAGCC
GGAATAATGCGCCTCCTATGGCTCCCACCATTCGTGGAGCTGATCGTTCTTCAGAGGGAG
AGAGGAGGCTGCCTGGTACAGAGATCTCCGGTCAGATTTTTCGGATTCGAAGCGCGGATG
ACCTATGAATTTTTCTCAATTTTGCTGCATCACCACAAAATTTTCGTTTCATTTGTGAGT
TCGAGAACTTTTTATCTTGTTTTGATTCTTTTTTTTTCATTCATGAAATTGTTAGCATGA
ATGAAAATAGTAGCCATAGTTGTGGCATGAACTATTTGCTGCATTTTTTTTTTTTTGGCA
GTGATACGAAAGAATTGCTAGATGGTAGTAGTATAATGGAATTTGCAGCATGATGATACG
TTCTATTCAGAAACACATAATGTAATCTATTTTGATATAACCAAAAGCTGTTGCTTGCTG
TGCAAAATGGAGTTTTGTCTGAAGCGTGAAAACTTCACAGAAAACAGTTCAATTGCACAC
ATGGGTACTTGAGTCTTTTTTTTTAACGAATCGGCATAGACTGTGTCCATTTCATTGAAT
ATAGTGGAAGAAAAAACCGTACAAAGCTAAAACTTTGGAAATTTACATAGGGAAAGGAGA
AAAAAAAAAGGGATTATCTTAGTTAGCCTTTTTGCGCCGGCTAGGGTATAGGTCTTGGCC
TCCTCCTTTATCTTTACGCAGAGCGATAGTGTTGAGAGTTCAGTGTGTTGGAAAATTCTT
TGATTTCTCTCTTTTCAGACCTCCCATGTCACTAGCAACAAGAAGGTGCGAATTTCTTTT
CTCGGTGTCCGGTGTCCCTTGGTGTGTTGCTATTGCAGTCCACCAATATTGGAGCGACGT
AGGTTGAGTCCAATGTAACTTGAGTCTTGTTTGGAACGTGAAAAACCGAAAACAGTTTTA
ACTCTGCTGAAAATTGAAATAAACCCCGGATTCCCAAATGTAAAATGGGGGGAGCAGGGG
AATGGCTGGGACCAACGACGGATTACGCAAATCAAGCCAAGAAAGCGTAAAGTGACAAAA
AGCGCAGAGCAATACGTGTCCCAGGCTCCCAGCGCCACCACCACCACCACTAGTCTACTA
CTACCACTGTAGTCAAGGAGAAGAGAGAAAACGCACTCCCGTGTCCCAGCCTTCCACTGC
>Os03g0844900|Os03g0844900	Os03g0844900; upstream from -3000 to -1; size: 3000; feature type:gene; location: Oryza_sativa.IRGSP-1.0.46:3:35523898:35526897:R
TCTTAGAAAATGAAACCGTATTCTTCTGTGCCAATGCCTAATGGTTAGAGAAAATTCTTT
TCAAGTATACCTGATAGTCTGATACATTAACCATATTCCTTTGTTTAGAGAGGAACATTA
GCCACATTCTATCCTCTTCATTTGCCATTCATAACAGGCGAGATGCTTTAATGCATACAT
TTTTTGCCGTTGCAACGCACGGGCACCCAACTAGTTAATTATAAAAAATGTAATTAAAAG
AAGGGGAAGAACACATTTTTTTTTAAAAAAAAAGCGAAGATGAAAGAAATAAACGAAATA
AGAGGATACGAGGCGACGGACGTCGATTGCCTAACGCCGACGCGAGGGTGACGTCAGGGG
AAGGATGACGCAGAGTAGACGTAAGCACGTCGTTGGCACGTTCCAGCTCCATCCATTCCA
ACCTCGCCCGCGCCGCGCCGCGATTCCGGAAGCAGCCGCTCCCGCGAAGGAAGAAACCAA
TAAAACAAAGCGTTTTTCATCCACACGTGACGCGAGGCAGAGGCACTACACACACTGCTC
TCTCTGTTTTTTTTTGGTCAACCCCAACCCAAGCAAAGCAGCCGCATATCTCTCCATTAA
TCACCTACCAAAAAAAAACAAATTATTTTGTTTTTAAAGATCATTTCCAACAAGAACACC
ATACCAATCCTTGGTCAAATTCTGCTAGTATTTATCCTCCTAGAGAGGGACATGGGGAGA
GGAGGAGTGGATCCACGATGATGACGAGGAGCATGATGAAGTTTTTCTCTCCCTCCTCCT
CCGCTATTTATACCACCCTCTCCTCTCGTCTCGCCAGGATCAACGCCACTCGCCACACAC
CGCCACCACCACCAAAGAGCAGCAGAGCAGCAAGATCACTAACCTGTACTACTGCCTCTA
ACCCCAAATCCAAATCCAAATCCAAGGCCAAGCATCTCCTGCTGCTTCTCCTGATTGTCT
CGCTCATCTTGCTTGCAGCTTTCTTGCTGATTCGAGCAACCATGTCTTCTTCGTCTTCGT
CGTCGGATGCTGTCGCCGCGGCGGCGGCGGCGACTTTTGAGAAGCCGAGGACGGTGGTGA
AGAAGCTCCTGGCGGAGTCCCAGCCCGAGGGCGACGGCGCCACCGTGCGAAGGAGCATCG
GCAGGTGAAGGATCATCATCGATTCAATCCTATCTCTGAATCTCTGATCGATTTGTTTTG
CCGAATCGTGTTGGGTTCTAATGGATGGGGGGCGTTGACCTCTGTTTTTTCTGCAGGTAC
GAGCTCAGGAACCTGGATCCTTTCCTCATGCTCGATGAATTCTCTGGTAATTACACAATT
CCAATTCACCGGTAGAGTAAAATCGCGGCCCTTTTTGTGCCCGAATGATCTTAATTTTCC
CCTTCTGTTTTACCAGTTTCCAAGCCTGCTGGATTTCCCGACCATCCGCATAGAGGATTC
GAGACAGTCACCTACATGCTCGAAGTACGGATGACTAAACTTCTTGTAGTTCCATTTCAT
CTTTTCTTTATGCCCGTAAGGTGTTTGCTGAAATGCTACTCATGGTTTCTTCCATTCAGG
GGGCGTTCACCCACCAAGACTTTGCAGGCCACAAGGGCACCATCGGCACGGGAGATGTCC
AGGTCTTACTCTACCCTCCAACTAGGGACATATCTTTCATCACTTTCAGAAATTGACGTT
TCACCAGAAAAAAAAAAGGGTGACTTTGTTTTCTAATTTCAGATGCTGACAATGCAATCT
TGATCATGTTTTTGTTCATCAGTGGATGACGGCTGGCCGCGGCATCGTGCACTCGGAGAT
GCCGGCAGCGGACGGTGTGCAGAAGGGCCTCCAGCTCTGGATCAACCTCTCTTCCAAGGA
CAAAATGTATACACACCATGATTGATTTGATTTGCACTCCAATTTTGCAAGATTGCATGT
TTGCAAATGCTCATTGGATGAACTTCTTCAATGCAGGATTGAGCCGAGGTACCAGGAGCT
TATGAGCAAGGACATCAGCTGCGCCGAGAAGGACGGCGTGGAGGTGAAGATCATCGCCGG
CGAGGCCTTCGGGGTGCGTTCGCCGGTGTACACGCGGACGCCGACGATGTACATGGACTT
CACGATGCAGCCGGGGTCGCAGCTGCACCAGCCCATCCCGGAGGCCTGGAACGCCTTCGT
CTACATCATCGACGGCGAGGGCGTGTTCGGGAGGGAGAAGGCGTCGCCGGCGACCGCCCA
CCACTGCCTCGTTCTCGGCCCCGGCGACGGCCTGAGCGTCTGGAATAAGTCCGGCGAGCC
GCTCCGGTTCGCGCTCGTCGGCGGGCAGCCGCTCAACGAGCCCGTGGTGCAGCATGGCCC
CTTCGTGATGAACACCCGCGCCGAGATCCAGCAGGCCATGGAGGATTACTACTATGGCAG
GAATGGCTTCGAGAAGGCCCGCCATTGGAGCTCCACAGCATGATTTCATCATCCTCCCTT
CATACCATGACACACCATCACCATACATAATGCTGCTGAGCTGAACATGATGCTGTTTTT
AGGCATATTAGTATATCATTTGATTCAGTAATAATAAATAGGTTTATTGTCATAAATTTT
TCCTTGATTGGCTGTGTAATAAAACGATATCTGTGCAATGAAAATGGTAGTAATATGATT
GGATTTTAAATGGAGCTGCACAACAGATTATGCACATGTCATTGACTCATTCTGAAAGCA
AATTTCAGAAATATCTAAATATCAAAGACATTAGACAACTTGACAAATTTTCTTCTCCAT
TTCGAAACATTCTAGAATATCAGCATGTGGATAAGGAATTTTTATTCACCCCAAATTCCC
CCCCAAAAAAAGTTAAGAAGATCAGTAAGCCACATGTCAACAAGGCACTGGGTGGCGTGC
ACCACGCGATGCTGCCGGAGAATGGACGGCCACGATGCATCTCCCACCCAAACCAAATCA
AATCCGTCCATCCATTCGCCTCTAGCAAAATAATCCGCCTCGTGCCGCCCGCGTTTCCCT
>Os10g0462900|Os10g0462900	Os10g0462900; upstream from -3000 to -1; size: 3000; feature type:gene; location: Oryza_sativa.IRGSP-1.0.46:10:17045051:17048050:D
AGATGGAACTAGGCAGGTACTTTACCAGAGAGTTCAAAAGGCTAGGAGAATCAATCGTTC
ACGTGGTATACCACTTTGGGTTCCTCCTGTGGAAGATGAGGAAGAGGTAAGTTGACAATA
TTTACTGCATTAGTCCTATTTGGTGGTGTTATCATGTGAGAAATGTTACCTGCTATTTTT
TGCTGAAGTTTTAAAGTACAACACTATTGATAGGTTGATGAAGAGTTAGATGAATTGATT
TCACGAATCAAGCTAGAAGATGGGAATACAGAGTTTTGGAAGCGGCGTTTCCTGGGAGAA
ACTCGGAATTATCTTTGTGAAGAAGTTAATGATGAAGAAGATGCAGATTTAGATGACGAT
GAGTTGGATGATGATGACGACGAAGATGACGACGACGATGATACCACAAAAGGAGAAGAA
GATGAGATCGATGAGGAGGATGCTGTTGAACAAACGGAAAATCAAGCCGGAGATGAAACT
AAAGACAAACCATCGAAAGGACCCAAGCAGCATCTTCAAATGATAGGAGTCCAGTTATTA
AAGGATCTAGAAAAGACATCTGTTTCATCAAAGAAGTCAAAAAGGGTACCTGAGGTATGA
AAGTGATGTGTCAACATTGTATGCAATGGCTCTTGATTGACCTTTCTATTGCAAATTAAT
TCTCCCATTGATCTGATGCTTGCAATCATCTCAATTGAATGGTTCATGTCGTGTTAACAA
CTTAAATTCAACATAAAGGAACATAATGTAAGGAATATACCTGTACATAATATATATAAT
ATTTTAAGTTTTGGAACATATCCTCTAGGACTTGCAGGCTGTATAGTGTAACCAATAAAT
CACGAAAAGTCTCTGCTTTCTTCTAATTTTGTTACATCAGCTACATATGATACTAAGAGC
TAATCTCTCAGTATCATTACAAATTTTGAGTCATTTCCTGCCTTTGTAGATTGATGATGA
TGAAGATTGGTTTCCTGAAGACCCAATTGAAGCTTTTAAGGTTATGCGTGAGACAAGGTT
GTTCGATGTGTCAGATATGTATACTACTGCAGATGCTTGGGGATGGACATGGGAAAGAGA
GATAAAGAATAAGATGCCACGCAAGTGGTCACAAGAATGGGAGGTTGAGTTGGCTATCAA
GATAATGCATAAGGTATTCAGCTTTATAGCTAAAGTTTTAGAGCTGGTCTCTTTGTCTGG
CATTGCTCCATGGACTTTGTGGTTCTGTTTGGTTAACTGTCTTCTCTTATGGAGCTGTGG
ATTTTGTGGACTATGGGATGCTGAGATTAGTTCCATTACTATATTCAGTTTACATCACAT
TTGTTATTGTTTTAGGTTAGCCTGTTATGACATGATAGGGTTTTGAGCTTGCACCAAAAT
TGTTGATGTTTGAATTATGGATTGTGTCATATGGCTGTTATGTTAACTTTCAGGTGATAG
ATCTTGGTGGTACCCCAACGATTGGAGATTGTGCCATTATATTGCGGGCTGCAATGAGAG
TGCCGCTCCCGTCTGCATTTATGACAATATTGCAAACAACGCATAGCCTTGGCTACAAAT
TTGGAAGGTAAAACTTTGGGCTCTCCATATATATGTAAAGATTTCCGTTTGTAAATCAGT
CCGACTGTCTAGTGATGTTTTTGTTGCTATATAAGTTTTGAGTTTGAAGCCCATATAATG
ATGTGTTTTTTGAATTTATAACAAAACATAACAAAACTACAATTTTTAACTCCTAAGACA
TATTTTTGATCTGTAGCTCATGCTGCACTGGATTAACCACTGCTCTTGATCCACACATGT
GTAGGCTGCCGCATTGTTGCAATATTTAGCTTACATTTTTGTCTATTCAAATAGAATTAA
AAAGTTTGGGCTATTCTTTATGATTTGATTCATATTTTGCTTATACACACTGTCAACATG
TTCTTACCTTTGCTTAAAGCCCACATCAACAGAGTTATCTGTAGTTTCTGAATCAAAATT
TACACGCTTGACAGTCTGTACTAACAAACCTTCCCTTCTTTTGTTTTTTTTTTCTTATGC
ACCTGGACTTAGCCCTCTGTACGACGAGGCGATCTTGCTGTGCCTTGATCTGGAGGAGAT
CGACGCGGCCATTGCGGTGGTAGCAGAAATGGAGACAAATGGAATCAAGGTACCCGACGA
GACCTTGGACAAGGTGCTCGCAGCTAAACAATCTGGTGGAAACTCTGCGCTCCAACCGCC
ACCTGCAGAGGAGTAATCTGATTGGAACAAGAAGCCCCTTTGTAGCCATGATCTAGCACA
CCACATAGAATCATCAGCTCCATGCCATGGATCATTTGTCTTGAGCTCGCCAGATCAACC
TTTGGCAGTGATGTGAGATCACTGCTCTGATGATAATCTGTCAAGGTGGAGAAAGATGAT
CTTATGCTTTGCCCTTGTTGGCCTTCCACTCCACACTCGATGTATTTACAGACAACCAAT
TTTGATACTCCTAGATGAAATGGAATTGAAACTGCTTGGAAGTTGGAACACGACATGTGC
TAGCGTTTGCAGGATTTTATAGGAACCAAATTCAATTCCTATAGATGATAAAAATTGGTG
TCCGTTCTAGATTATGCCTTCCTGCTCTTTGACCTGTTTAAGAGAGTTTCTAGCAGTTAT
AGTTTTTTTTAAAAAAAAATCTATAACTATCCCAAATGCTTATAAAGATATATGAATTTT
GAGAATTTATAGTTATAAAAATCTAGAAAAAATAAAGTAGAAATCAAAAGCTAACAAACC
CATTTTCTTTTTCTTTTTTAAAAAAATTCTCACTAGTTGGCTCACGAGCTACTTGAATTT
CAGCTCCTAAACAGGGCCTTTGTGTCACGTAAAATTGTTGGGCTTAACAGTCTTACCCAT
ATATTGGGCCGGATCTCACGCTGGCAAATTTGGACCGAAGCCCAGCACCACCGCACCGCG
CAGCTTCCGCCGCCGCCGATCGAGCGGGCGACTTAAAACCCTAAACCCTAGTGGATGGAT
>Os02g0101500|OsHPR1	Os02g0101500; upstream from -3000 to -1; size: 3000; feature type:gene; location: Oryza_sativa.IRGSP-1.0.46:2:82953:85952:R
AAATCTTTCTCTCTTCTGTAATTCTTGTATTTTTTTATACGGTCGAAACAAACGGTCGTT
CCTATGTTTCGTAATCCTACGATTTAAAGAGGTCCTAAAAAGAAAGTTATCTAAAAAAAA
GGTTAAAAAGCAAGTCATGTTGGTGTGTGTGAGAGAGAGAGAGAAGCCAACCAAATGTAA
GCCCACCATCCAGATAGAGGGAAGACCAACCAAAGAGAATAATAATAAATAAATAAATAG
TCTCGGTCCACCGTCGTCGTCGTCTAGGGTTTCCTCCTCCTTCCCAGCGGAGATCAAGAA
TCAGAAGCAACAGCTATGGCGGCGGCGGCGGAGGGTGAAAAGAAGATGATAACGCTGAAG
AGCTCGGATGGAGAGGAATTCGAGGTGGAGGCGGTGGGCATGGAGTCTCAGACCATCCGG
CACATGATCGAGGATAAATGCGCCGACAATGGGATCCCCCTCCCCAACGTGAATTCCAAG
ATCCTCTCCAAGGTTATCGAGTACTGCAACAAGCACGTTCACGCCTCCGCCGACGACTCA
ACCTCCTCCGCTGACCTCAAGAACTGGACGCCGACTTCGTCAAGGTCGACCAGGCCACCC
TCTTCGACCTCATCTTGGTAACCCATTCCCTCTCCACTCCCCGCTCTCCTCTCCTCTCCT
CTCCGATTATTTTTTTTATTTACATACAGCGCAGAGTTCGTCCAGATCTATCTAGGTTGC
ACTCTTCTCCCTACCCTAGGTCTTGGCTTTACCAATATACTCCAGTAGTAGTATATTTCT
ATATTGGTACTACTCCACTACGTCTTAAATAAGTAACTACTCCCTCCGTCCCAAAATAAG
TGCAGCCATGGTTTTCCGCGCCGAACTTTGACTGTTCGTCTTATTTGATTTTTTTTTAAA
AAAAATTAAAAACATAAGTCACGAGTAAAGTACTATTCATGTTTTATCATCTCATAGCAA
TAAAAATGCTAATTATAAAAAAAATTTAAATAAAACGGACGACCAAAGTTGGGCGTGGAA
ACTCATGACTGTGCTTATTTTGGGACGGAGGTAGTAGATGATTTATTATGCCTATGTGAA
TCTGGTTGCGTGTTGTTAGCACAGCTTATCTGATGATTATTGCGTGTCCTTGTTTTATCT
CCCAAATCAAACCCATTGTGTACAACTCTAGGGGCTGCCATGCTTTTTATTTCCATTTAT
TTCAACTAGTGCTCTTCTTTTCTTGTGCTTGGGGACAATGTTGATGGGTGGTGGGTTTAT
TACTCTTCTACCAGTAACGCTGTCAGTTTGTGTCAATTGATACTGTCTTCACTTTTAACA
TCCATAAATGCATTGGCTTGCTAAGCCTTAGGTTGTGTTTAGTTCCTTCCAAAGTTGGAA
GTTTAGGTTAAAATTGGTACGATGTGACTGAAAAGTTGTGTGTATGACAGGTTGATGTGA
TGAAAAAAGTTGGAAGTTCGGATCTACTGTCTTTGTGGCTCAAATCTATTGTATGCTTCC
TTGTCTCCCCCCCTCCCAAAATGGACCCTTCTAGGTTTTCCTAATGCATTATATGTTTTT
GTTACTGTTGCAACATACTTGGCAGTACAATTGATGCTCGGACTTATATTTATTGTGCTA
GCCTTTAAATTTATAATCATGGTACCCTTTTTAAACATGTGGATATATTGATGTTCAATT
CATTTAGGCAATGTGGTTAAGTGATCCTTCTGTCATTAATTGTCTACTTGTCTGTTGTGA
CAGCTTAGTGCTTTTTTAGAAACCAACAATTAACTGTGACTAGTGGGCTAACGTTACCTA
ATAATTGGTTCCATACTTGTTACTTTCCTCTTACCTCCTAATTACCTGTATTTTCTCTAG
GGATAGTGCACATGTATCCATGTTTAATTGGAGGATTTGCTGCTCTTTAAAAGGACAATA
GATGTTTGATAGTATTTAACTACCAAGTCCCTTGACATGTTAGTGGCTTCCTGTATTAGT
CTGTCTCAATGGATTTTCCACATATATACATAATAAATAGTGGAAAAATATGTTGCCCTT
GAAGAAGCAAAGAGCTGTTTGGTATGTAATTGTGAAGCATGTGTTGATAAAATGTTTAGT
TTTATTGTTGTTAACCTGAGATATATAGATCTGACTTGTGAAGTACTTGCCTAACACACG
GATGAATTGGTCCACCTGATTTGCTCTTTGGAAACATAATGTATGCCTGCTTACCTGCCT
TTGTTATTCTGTTCCAGTTTTAACTCAAGTGTGCCTAGATGTGTTGATTATTTTCTGTAT
GTAGAAAGGAAGAAAGAAATTGATTGTCCACCTCTTGCAGGCTGCAAACTATCTCAACAT
CAAGGGATGGGATTGCTGGATCTGAGTTGCGCAGACCGTTGCAGACATGATCAAGGGCAA
GACTCCGGAGGAAATCCGCAAGACCTTCAACATCAAGAAGGACTTGGCCCCTGAGGAGGA
AGAGGAGATCCGCAGGGAGAACCAGTGGGCGTTTGAGTAGAGATGCAGCAGCTGCTACAT
GTGGCCGGTCGGTTGCAATGGTTGTAATTATTTTGGAGTGAGAATGAATGGTGGGGTGGG
GGGGGGGGGTGTGGTTAGTGAAGGAAGGATGAAATGAAATGGGGGTTAGGTTAACTAGCT
GGTTTATGAAGTATGGGTATGGAAGGGAAAACAAAAACTGAAGATTGTTACTATAAGGAT
GTTATGTGCGGCTGCCTAGACTGCAGTTGATATCGTCTGGTGGATGGATGATTTATTACT
GGGATTATAAAGTCATCTGATTGTCGTCCATTGTCTCAGTGTCTGTCTGTCTATCTATCT
AATCTGTGCCGCAGTAGTGTTGGAGGAAGTGCCAGGTGGTGAGGCAGCAGCGAGTCCAGG
CCAAGCCTTGGCCTGGAGGAAAGAAAGAAAGAAAGATGATAAGGCGGCTGGGTGTGTCTG
GTCTCTCCTGGTGTTGGTTGCCACACGTATATTTGGGCCCCTTATCCATCCATGATTTTG
>Os02g0783625|Os02g0783625	Os02g0783625; upstream from -3000 to -1; size: 3000; feature type:gene; location: Oryza_sativa.IRGSP-1.0.46:2:33257356:33260355:R
ATTTAGAATTAAAATCAATATTATATGGCGTCTATAGTTTGGGAATTAATTATTGCTATT
TTTGGAACAATCTGCTACTCATTGATGGCATGTCAAATTCAGAGCTTGAAGTAAGAAATC
ATTTTCTTTTCTATGCACACTTATTCAGGATAAAAAACAAAATTACATGGTGTTTCTAGC
TTGGGAAATTAATTGTTCCTGTTCCTAAAATTATCAATCTCCTGCTACCACTCATTAAAA
AAAACAAATTTTGTTACTGCCAAGAAAGCTAAATAGTCTGAGAACTGAAACGTTATGTCT
TTTCTTATGGAACCTTCTTAGCAGTAATACTGTATGGTAGCTCTTGATGATCCTATATAT
TTGGATTTACGAATTTAAAAGTTGATATAAAGAACAAAAGGAGCAAATGACAGAGGTTGG
AATTACGTGCTGGGCTCCTGTTCCATTCCCATGGTCCCACCCATCTCTATCTCTGCTGCA
AAAGGCAGAGGGAGTATGACTAGTGCAAAAGCAGTCAGATATTTTTTCGAACGGTCAGGC
CGTTGCCGACGTTTTATATTAAGAAGAAGATATCCTATTGTAAGGAGAAAACGGGACCAA
ACCTTACAATGCTCAATTAATTAGGGAAAACTGGGTGAAAACCACAACTACAACACCACA
CCAACAGCTAACCTAACCTAAGCTACCACGACGGAGCCCAACACAAGGCATCGGTCAAGC
TTGCCATAGAGACGACACGACAACACACATGTTATCGTTGCCGAGCTTGTCACCCAAGTG
ACACAGCAGCTTCGACTTCATTGTGATACTACCCCAACGCCAAAATGAACAAACAAAAGC
GACGCCCACGAAGGACATCAGCCCAAAATACCAAGGGACCACTCCTCCTCACAGCTAGCA
TCAACAATCCTATAAAGACATTGCAAAGTGCCATCATTGCCAAGCTTCGTCGCACCCCAA
CAACAAAGCAGCTCCGACTCTACCTAACAATAACCAAATAAGAGTGATGAACACCCGCCG
TGGAGCAAAGAGCGAAACCAAGTCTGTGAAGGCCTCGTCAAACACCCTAGGCTTGTAGAG
CTTCGGAGACGTTGCAGGAATCCACCAATGACTACCATTGCACGTAAAGGGTTCTTGGTG
CTAGGAGGGGTCAACGCCAAAACAACACCTCCAAGGAGGGGAACGGCGCCTAAAGACGTC
GTCGTCGTCATGCCGGCCCATGGCCTGGCAAGGCTTTCGCCAGCGATTCCCGAACAAAGC
CCCACACAACCATCCCGCACAACGACCATCGCCGGACCACCACGCTATCTCTTCAACGCC
CAAGCACAGCCCACCCGCCCCCGTAGCTCAAGCTGCCAAGTGAGAAGACCTCGGTGACCG
CGTGCACCGGTCTCCTCGCGCAGCATCGCCGCCCACAGCTTCACGCCGCTGGCCATGGCC
GCGCTCCGGCCAAAGCCTCGCCGACCGCCACCTCGCAGACCACCGGCCGCCGCCTTGCCT
TGGCCCGCGGCCTCGTCCTCCTCCTTCCCGCCCATCCCGCACGCGTCGCGAACTCACAGC
CTACCGGCGACGACGGCCGACGGGAGCACGGGCAGAGCAAGCCGGCGCCGTCGGGCTCTC
AGCAAATCAGCGCGGCGACAACACCCGTGCTGCCGCCGGTTCCAGGCTGCCTCGCCGTCC
TCTCTCGCACCGCTAGCCGCCTGCTCCGCCTCTACCGCCACGTCGCCCACCGCGCCGGCC
GGATCCGCGGGTGGGGGGGCCAGATCCGGCCACAGAGGTGCCGGATCCGCTGCCCCAAGC
CGACCCGCCGTCTCCGCCTCCGGCCGTGTCATCGTCGGCCTTGCCCCGTCCTCCTCGCGC
AAGGGCGGTTCCGCCAAGCTGTTTGGCCTCGCCGCCGCCTTCCCGGCTCACCGCCGGCTT
TGCCGCCGGCGAGCTCTGGCGGCGGCGAGGTGGAGGAAGGGAAGAGGGTGTGGCGGCGCG
GGCAGCTAGGGTTTCGCCCCCCGAGCCGCCCGCGTGAGAGGCGACGCGGGGGATGACTAC
AAACAAATCTCTGAACCTTTCCATGTCATTACACTAAAAGCAGTCAGATATAAACCCTCA
GATATTCTTCATGCAATTATTGGAGAGGTTCACTAGTTCATCTCCGTTCCCCTTTCTGAG
TACACCACGCTCTGCCTGCTTTCTACTCCGACTGATCATCAACCTGGATGGACATCCATG
AGTTTGTGCCTTTTCCTTTCATGCTTCTTCTGAACTCTGTTCTTTTCTTCAATTTTGTGT
ATGACCTTTTTTCGCTCTCAAGGAAGTATGACTGTTTTGGAACTTGAGTTTTGCAGCTGT
GATGCAGTGAACAAGTTACATAAAACTCAGAATCTTGCAGCCCTATATGATGAACTTTAA
CAATCCTACAATCAATTTCAAAAATCTTTCTTCAATGTGTAAATATTCCAGCGGGTCTCT
CTCTCTCTGTTTTTTTTTTTTGGGGGGGGGGGGCATTAATCAATACAGGACAAATTACAA
TTGTTCTGGATTAGACCATGCCAAAAAGTTAGATTCAAAACCACGCTAGAAGCCAGATAA
TCCTTAACTTCTATCTCTCGTGGCTAATTCATGACTAATCCCAATTTGGTCATGGCGAGT
TCAAAAGCCATTTACCAACTTGTTGTAGTTTGATTCTTCTTTATTTAGAAAAAAAATGGA
AGTCACCCACACATTACATCATTACATTATGCTATATCAAATAATGATGTAAATTTAATA
CTAGGCTAAATCTGAAACTCTATAAACCCAGATCACACAAGACAAACTGATTTTGTATTA
TAGCATTCCTGAACTTCTTTTGTTGTTTGGGTACATATCCAGTAACTCATGCCACTTTTT
TTTTTTGTATTTACCATGATATTATTGTTTTATTATTTTCTTGGTAAACATGTTACTGGT
CTTATCCTCCTTGGATTGCATTAAGCCAAACATTTTAGTACAACTTTTTTTCTGAGTTAT
>Os11g0520500|Os11g0520500	Os11g0520500; upstream from -3000 to -1; size: 3000; feature type:gene; location: Oryza_sativa.IRGSP-1.0.46:11:18777521:18780520:D
CGTCTAATTTGTGTGCATGGCTGCAGTTTACAGCCGTGGATACTAAGCAACAGCCGCGGC
CGAACAAGCACTACATTTATTTTTAAAAGAAAAAGGCTGTATATATCTTTCTCTCTTACA
AAAACTGCATATATCTGTCTCTCTCTCACTCTCTCTAATGGAAAATATCAAAATATTGCA
TCTCTTTGGAAAGCCTTTCTGGCCCAACTTCTAAGCTGGGCCCTTGTGGCCGTGTTGCTC
TTCCCCCCTTACAGGCTACAGCCCAATAATTGTCCATAGCACATAACTATAGAGCCCAAA
GAACAACAAAATCTGAACATTAAGCAGGAAGGTTAGTACAGGACTACAGGCTTGACTCTT
GTTCCATTTTTTTAAAAGAAATTTTCTCTGATTTATATTAATGACAATGTACGCTTAAAG
CAAAAGAGGATGGTGAAACCGATGAAGAAAAGAAAACATTTCATTTTAGCTTGGTCATCA
AGTTGTATCAAGAAAGCTATGATGGTTCAGTACCAAGGATCAAAATCTATTACTATGACA
CATATTCCTGATTTCAAAAACCATATATATCATTTTAGTTTGGCCATCAATTTGTATCGA
CATAGTTATCTTGATTATTGCCCTTCATGAAATTCGCTACATCCAGATTTCAAACAATAA
TAACACTTTCCCCTTCTCCCTGCCAGGAAAGGTTGCCAGTAGGACTTCATATTGTCATTA
GTTAGTTGAAAAAAATATCATTAATTGTTCCGTAACTTTATCTTTTTCCTACAATTTGTA
GTTACAAAGTCCTCACAAGAAAAAAAAGAAGCTCCAAGTGAATTTTCTTTGAAAGCTTCA
TCTGAGAAATAAGAAAATAGAGAAAAATTCAGAATTAGAGGTCTGTTCACTTTGATGACA
TTTTCAACCTTACCAAATTTTAGTAAAGTTGCCAAAAAAATGGCTACATTTAGTTTGTTG
CCAAATTTTGATAACTATATAAGAAATCCTGCTAAAATTTTGGCAAGTTACCAAAATTTT
GGCAACTATGCTAAAATAATGCTAAAATTTGGTAAGGTTTTTTTTTTACTTCTTTTTTCC
CTCTAAAAAAATATTCAAAAAAATTGCTCTGCGAAGGGAAATCATTTGCGTGTCATCGAA
GCCAAGTCTACCCCTTGACGTGTCAAACTTGATACTAAAAGGGTGGGGCCTACAGAAAAT
AGAAATGTGGGCCCCGCTTGTATTGCATAACCGAACTCCGAGTCAGCCCTGCTGGCCCAA
TGACATGTGGGCCAGCCCGTCCATGACCGTCGTCAGTAGCACGAGCGTTTCCACGTTACG
TTTAGACCCTGTTTCGCACTAAACCGCCTAACCTTTTTCCTATTTTGCTCTTTTGGGTAC
GACTAGTACTGACTAGTATAATGCATCACATGTAGGCCCCTAAAAACTTTATGAATTTCA
TGAAAAACAAAAGGTTGGGGAGGGTTGTGTAAATTGACTGGTTTCTCATAAACAAAAGTT
TTGAACTTGTACAAGTTGATGATGTGGCCCAATACGAGGGCAATATCTTCATTTCGTACC
TCCTGAGGGTCTAATTTTCATGTTTTGCAAATTGAAACGGTCATCCTGAATTCCTGATCA
TCACCCCCAACAAAGATACCCAATTTTCAACAACTAAAAAAAACTATACATAGTGGCAAC
CAAAAACGATCCGAGCCTTTTGCTTCTCTGTTGACGCCGTATTTAGTTCCAAATTTTTTT
TTCAAACTTTCAATTTTTTCATCACATCAAAACTTTTCTACATACATAAACTTCCAACTT
TTCCATCACATTATTCCAATTTCAACCAAACTTTTAATTTTGATGTGAACTAAACACAAC
CTGAGTTTGATTATGCTCCCATACCAATGCTCCAAATTAAAACCATATGGCTCGGTATTT
GAAATCAAATTAGTATTAGAGTAAAATACTATTAGAATTTAGGTAAAATAGTGATCTAAA
ACGTATGTCGGTTAGACTGTCTCTTAGGGCACCCACAATGGTTATTTATAAGCTCTCTAC
AAGATATCCATGTCAGCATATTTTCCTACTTGGAAGAGATTAAATGAAGAGAGAGAGAGC
AAAGCTATCTACTAACCTGGAGATAGTCTATAGAGAAAAACGAGGCAATGGATTAGAGAG
CTATAGATACCCATGTAGACATACCATTGAAGTGGTTTACTATTAATCTAGTCTACTGCT
GAGATGTACATGTTTTATAAATAGCATCTTACTTTACCATTGCGAGTGCTCTTAGACTGT
GTTTTTCCCTCAAGGTTACAACCTCATATCTTTTGTTTTCTGCGCGCAAGCTTTCTAAAC
GGCTAAATTATGTGTTTTTTGAAAATGTTTCTACATAAAAGTTGTTGTAAAAACCATATT
AATTAATTTTTAAAATTTTTAAGCTAATACTTAATTAATCATGCGTTAATTCATTGTTCT
GTTTTGCGGAGGTGTTCCGACCCTTTCACAAGAAATCAACCTAAACTCAGCACGAAAGCT
CGGATTTGGTGTTTGTGATTGAGTTCGTTTATTTCGAGAAATGTCAATCCACATTCTAGA
AGTACTCACGTAAAGGTTGGTGTCTATGAGTGTATATATTTATAGTGTTGTAGAAAGATA
ATTTTAAGCAAAGGCTGAGTTTACTTCTAAATTTTTTCTTCAAACTTTCAGTTTTTCCAT
CACATCAAAACTTTTCTACACATATAAATTTTCAACTTTTCTGTTATATCGTTTTAATTT
CAATTAAACTTTCAATTTTAGTGTGAACTAAACATACCCAAAATGTAATATCCACAAAAG
AAGAGAGAGAAAAAAAAATCCAACTTAGAGACCCGCAGCCTTCCTCTCTTCCATCCTTTT
CTTCCCGCAGCCTTCCTCGAAACGCCCAAATTCCCACCCTCCCCCAACGAGACAAAGTCA
AACCCAAGGTCAAAGCGGCGCACGCGGCCGTGTCCTCCACCCTCGCCGTCGCCGACGCCA
