# Supplementary material for: A Comparative Transcriptomic Meta-Analysis Revealed Conserved Key Genes and Regulatory Networks Involved in Drought Tolerance in Cereal Crops
Source: Int J Mol Sci. 2021 Dec 2;22(23):13062. doi: 10.3390/ijms222313062 (PMC8657901; doi:10.3390/ijms222313062)
Supplement: Supplementary file 1 [file ijms-22-13062-s001.zip › Supplementary_Tables_S1-S8.xlsx]

## Sheet: Table S1
Species	Cultivar	Condition	SRR accession	Sample title	Sample ID	N° raw reads	N° reads after trim/filt	% trim/filt	Reads aligned to reference genome	% Aligned Reads
Brachypodium dystachyon	Sensitive (KOZ1)	Control	SRR8618253	KOZ1_t2-control_rep1	Bd.sen.C1	11401160	11299549	0.991088	10945190	0.96864
			SRR8618254	KOZ1_t2-control_rep2	Bd.sen.C2	11230112	11133806	0.991424	10790152	0.969134
			SRR8618255	KOZ1_t2-control_rep3	Bd.sen.C3	11270360	11185151	0.99244	10869807	0.971807
		Stressed	SRR8618256	KOZ1_t2-treated_rep1	Bd.sen.S1	11388827	11299044	0.992117	10945280	0.968691
			SRR8618257	KOZ1_t2-treated_rep2	Bd.sen.S2	11602820	11505169	0.991584	11116806	0.966244
			SRR8618258	KOZ1_t2-treated_rep3	Bd.sen.S3	11587766	11501631	0.992567	11092472	0.964426
	Tolerant (ABR8)	Control	SRR8618238	ABR8_t2-control_rep1	Bd.tol.C1	11131307	11017433	0.98977	10467201	0.950058
			SRR8618239	ABR8_t2-control_rep2	Bd.tol.C2	11104161	11010997	0.99161	10489219	0.952613
			SRR8618240	ABR8_t2-control_rep3	Bd.tol.C3	11184998	11085452	0.9911	10555171	0.952164
		Stressed	SRR8618241	ABR8_t2-treated_rep1	Bd.tol.S1	10842491	10741983	0.99073	10247118	0.953932
			SRR8618242	ABR8_t2-treated_rep2	Bd.tol.S2	11024545	10937140	0.992072	10383371	0.949368
			SRR8618243	ABR8_t2-treated_rep3	Bd.tol.S3	11092129	10993711	0.991127	10437361	0.949394
Hordeum vulgare	Sensitive (Scarlett)	Control	ERR1248116	Scarlett leaf control 1/3 7_8	Hv.sen.C1	35369838	33781216	0.955085	31050366	0.919161
			ERR1248117	Scarlett leaf control 2/3 8_12	Hv.sen.C2	43624199	42361367	0.971052	39098929	0.922986
			ERR1248118	Scarlett leaf control 3/3 5_27	Hv.sen.C3	58092096	55664419	0.95821	52142781	0.936734
		Stressed	ERR1248119	Scarlett leaf drought 1/3 8_11	Hv.sen.S1	36493627	35299998	0.967292	32694522	0.92619
			ERR1248120	Scarlett leaf drought 2/3 8_14	Hv.sen.S2	37183819	35934861	0.966411	33389438	0.929166
			ERR1248121	Scarlett leaf drought 3/3 5_22	Hv.sen.S3	48862365	46713490	0.956022	43811456	0.937876
	Tolerant (SBCC073)	Control	ERR1248280	SBCC073 LF control 1/3 4_7	Hv.tol.C1	46638833	44245499	0.948684	40880933	0.923957
			ERR1248281	SBCC073 LF control 2/3 7_9	Hv.tol.C2	36767372	35346882	0.961365	32979770	0.933032
			ERR1248282	SBCC073 LF control 3/3 8_13	Hv.tol.C3	31599750	30510867	0.965541	28288044	0.927147
		Stressed	ERR1248283	SBCC073 LF drought 1/3 7_10	Hv.tol.S1	39701819	38186902	0.961843	35417207	0.92747
			ERR1248284	SBCC073 LF drought 2/3 4_27	Hv.tol.S2	58550894	56355706	0.962508	47486818	0.842627
			ERR1248285	SBCC073 LF drought 3/3 5_25	Hv.tol.S3	50417762	48406049	0.960099	44604492	0.921465
Oryza sativa	Sensitive (HanFengB)	Control	SRR3090734	HanfongB(F) Well water T1	Os.sen.C1	18699290	16477225	0.881168	15181396	0.921356
		Stressed	SRR3090733	HanfongB(F) Drought stress T1	Os.sen.S1	14484895	12804837	0.884013	11910946	0.930191
	Tolerant (HuHuan2B)	Control	SRR3090736	Huhan2B(F) Well water T1	Os.tol.C1	17919109	15759986	0.879507	14562302	0.924005
		Stressed	SRR3090735	Huhan2B(F) Drought stress T1	Os.tol.S1	17375380	15347222	0.883274	14158992	0.922577
Zea mays	Sensitive (MO17)	Control	SRR5989969	T08	Zm.sen.C2	23820647	23740478	0.996634	20174311	0.849785
			SRR5989970	T09	Zm.sen.C3	23590311	23502952	0.996297	19426130	0.82654
		Stressed	SRR5989973	T10	Zm.sen.S1	22127912	21983451	0.993472	18034399	0.820363
			SRR5989974	T11	Zm.sen.S2	34297774	34066875	0.993268	27790988	0.815777
	Tolerant (YE8112)	Control	SRR5989967	T01	Zm.tol.C1	32931940	32833345	0.997006	29470213	0.89757
			SRR5989968	T02	Zm.tol.C2	32090844	31997887	0.997103	29013522	0.906732
			SRR5989965	T03	Zm.tol.C3	29613753	29536356	0.997386	26626756	0.901491
		Stressed	SRR5989966	T04	Zm.tol.S1	28848150	28773768	0.997422	26185050	0.910032
			SRR5989971	T05	Zm.tol.S2	29590785	29494267	0.996738	26518072	0.899092
			SRR5989972	T06	Zm.tol.S3	26602527	26527356	0.997174	24059455	0.906968

## Sheet: Table S2
	Bd.sen	Bd.tol	Hv.sen	Hv.tol	Os.sen	Os.tol	Zm.sen	Zm.tol
TOT DEGs	6696	295	735	1914	3284	2494	5044	931
orthologous genes in rice genome n°	5295	247	540	1357	3284	2494	4257	771
orthologous genes in rice genome %	0.790771	0.837288	0.734694	0.708986	1	1	0.843973	0.828142
univocal orthologous genes	5122	231	512	1272	3284	2494	3802	675
univocal orthologous genes %	0.967328	0.935223	0.948148	0.937362	1	1	0.893117	0.875486

## Sheet: Table S3
				BRACHYPODIUM				BARLEY				RICE				MAIZE
DEG in Todaka - Log FC in Sds	Oryza RAP ID	Oryza gene description	69 genes	geneID Brachy	logFC.sen	logFC.tol	Class	geneID Hordeum	logFC.sen	logFC.tol	Class	geneID Oryza	logFC.sen	logFC.tol	Class	geneID Maize	logFC.sen	logFC.tol	Class
-31.7399	Os09g0438100	Conserved hypothetical protein	X	BRADI_4g31140v3	-2.26	0	sen-	HORVU5Hr1G062450	-2.45	0	sen-	Os09g0438100	1.99	0	sen+	Zm00001d005807	-5.96	0	sen-
-26.0099	Os08g0485900	Haloacid dehalogenase-like hydrolase domain containing protein	X	BRADI_3g38777v3	-3.39	0	sen-	HORVU2Hr1G085300	0	-1.08	tol-	Os08g0485900	0	-0.97	tol-	Zm00001d001860	-1.51	0	sen-
-23.2524	Os10g0516100	H subunit of glycine decarboxylase complex (GDC)%2C Photorespiratio	X	BRADI_3g30500v3	-3.2	0.55	sen-/tol+	HORVU6Hr1G076880	0	-1.53	tol-	Os10g0516100	0	-0.72	tol-	Zm00001d023699	-2.15	0	sen-
-19.0154	Os07g0412100	Similar to Granule-bound starch synthase Ib%2C chloroplast precursor (EC 2.4.1.21) (Fragment)	-	BRADI_2g41590v3	1.75	0	sen+	HORVU2Hr1G090980	0	0.87	tol+	Os07g0412100	1.09	1.83		Zm00001d019479	-2.43	0	sen-
-18.925	Os01g0111100	Cyclophilin-like domain containing protein	X	BRADI_2g00950v3	-1.85	0.54	sen-/tol+	HORVU3Hr1G000900	0	-1.36	tol-	Os01g0111100	-0.64	-2.01	ΔLFC<-1	Zm00001d008440	-3.07	0	sen-
-10.6951	Os09g0294000	Similar to Bifunctional aspartokinase/homoserine dehydrogenase 2%2C chloroplast precursor (AK-HD 2) (AK-HSDH 2) [Includes: Aspartokinase (EC 2.7.2.4)%3B Homoserine dehydrogenase (EC 1.1.1.3)]	X	BRADI_4g27450v3	-2.76	0.63	sen-/tol+	HORVU5Hr1G053950	0	2.07	tol+	Os09g0294000	0.67	0	sen+	Zm00001d019988	0	-1.9	tol-
-10.5661	Os12g0115700	Chalcone isomerase domain containing protein	X	BRADI_4g44390v3	2.81	0	sen+	HORVU5Hr1G046480	-2.65	0	sen-	Os12g0115700	1.51	0	sen+	Zm00001d044683	0	-1.96	tol-
-10.1496	Os03g0129300	Similar to Glyceraldehyde-3-phosphate dehydrogenase (EC 1.2.1.13) (Fragment)	X	BRADI_1g76470v3	-2.61	0.51	sen-/tol+	HORVU4Hr1G082700	0	-0.85	tol-	Os03g0129300	0.66	0	sen+	Zm00001d027488	-1.94	0	sen-
-10.1239	Os05g0535900	IQ calmodulin-binding region domain containing protein	X	BRADI_2g18640v3	0.91	0	sen+	HORVU1Hr1G080360	0	0.5	tol+	Os05g0535900	1.13	0	sen+	Zm00001d011138	-1.79	0	sen-
-9.71534	Os02g0673500	Basic helix-loop-helix dimerisation region bHLH domain containing protein	-	BRADI_3g51490v3	-0.74	0	sen-	HORVU6Hr1G065210	-1.4	0	sen-	Os02g0673500	-1.12	-0.89		Zm00001d017573	-1.4	0	sen-
-9.47809	Os04g0644600	Epoxide hydrolase family protein	-	BRADI_5g23790v3	-2.2	0	sen-	HORVU2Hr1G114720	-1	0	sen-	Os04g0644600	0.53	0.49		Zm00001d026437	-1.72	0	sen-
-9.12087	Os02g0613900	Similar to Adenine phosphoribosyltransferase 2 (EC 2.4.2.7) (APRT)	-	BRADI_3g48670v3	-3.65	0	sen-	HORVU6Hr1G056910	0	-2.13	tol-	Os02g0613900	-1.5	-1.62		Zm00001d017204	2.95	0	sen+
-9.06485	Os01g0639900	beta-carbonic anhydrase (EC:4.2.1.1)%2C Carbon assimilation%2C CO<sub>2</sub>-mediated stomatal pore respons	X	BRADI_2g44856v3	-4.05	0	sen-	HORVU3Hr1G057090	0	-0.91	tol-	Os01g0639900	0.4	-0.39	sen+_tol-	Zm00001d011454	-1.09	0	sen-
-8.15066	Os10g0502400	Similar to Glutamyl-tRNA reductase 2 (EC 1.2.1.70) (GluTR) (Fragment)	X	BRADI_3g11060v3	-1.94	1.79	sen-/tol+	HORVU7Hr1G026300	0	-1.38	tol-	Os10g0502400	0	-0.62	tol-	Zm00001d013915	0	-1.22	tol-
-7.92548	Os03g0850400	Similar to Aspartokinase	X	BRADI_1g01800v3	-1.89	0	sen-	HORVU5Hr1G121250	0	0.89	tol+	Os03g0850400	0.72	-0.88	sen+_tol-	Zm00001d034851	0	-0.97	tol-
-7.81326	Os03g0336000	Pentatricopeptide repeat domain containing protein	X	BRADI_1g63190v3	-1.71	0	sen-	HORVU4Hr1G050230	0	-0.65	tol-	Os03g0336000	0.76	0	sen+	Zm00001d029061	-1.04	0	sen-
-7.58311	Os07g0148900	Photosystem I protein-like protein	X	BRADI_1g58350v3	-2.38	0	sen-	HORVU2Hr1G060480	0	-0.72	tol-	Os07g0148900	0	-0.46	tol-	Zm00001d018797	-2.11	0	sen-
-7.26249	Os04g0234600	Similar to Sedoheptulose-1%2C7-bisphosphatase	X	BRADI_2g55150v3	-2.58	0.52	sen-/tol+	HORVU3Hr1G085270	0	-0.89	tol-	Os04g0234600	0.44	0	sen+	Zm00001d042840	-1.82	0	sen-
-6.99735	Os07g0509800	Similar to adenosine 5'-phosphosulfate reductase 2	-	BRADI_1g26530v3	-2.88	0	sen-	HORVU0Hr1G003890	0	-1.08	tol-	Os07g0509800	0.59	0	sen+	Zm00001d006467	-1.42	-2.21
-6.84184	Os12g0420200	Chloroplast stem-loop-binding protein of 41 kDa b%2C Chlorophyll biosynthesis and photosynthesi	X	BRADI_4g08030v3	-1.88	0.47	sen-/tol+	HORVU2Hr1G036220	0	-0.69	tol-	Os12g0420200	0.59	0	sen+	Zm00001d035212	-1.93	0	sen-
-6.3296	Os03g0114800	Protein of unknown function DUF791 family protein	X	BRADI_1g77580v3	0.65	0	sen+	HORVU4Hr1G088860	0	0.8	tol+	Os03g0114800	0	-0.84	tol-	Zm00001d027344	0	-1.55	tol-
-5.92035	Os07g0671000	Similar to FPF1	-	BRADI_1g62652v3	-3.27	0	sen-	HORVU4Hr1G085800	0	-2.81	tol-	Os07g0671000	-2.53	-2.63		Zm00001d022477	0	-1.78	tol-
-5.73593	Os06g0699600	CCT domain containing protein	-	BRADI_1g34060v3	0.9	0	sen+	HORVU7Hr1G097630	0.88	0	sen+	Os06g0699600	0.84	0.99		Zm00001d014664	0.9	0	sen+
-5.65905	Os10g0100300	NAD(P)-binding domain containing protein	-	BRADI_4g33940v3	-3	0.55	sen-/tol+	HORVU5Hr1G074000	0	-0.71	tol-	Os10g0100300	-0.7	-1.27		Zm00001d007921	-1.52	0	sen-
-5.3655	Os12g0626400	Similar to Phytoene synthase 1%2C chloroplast precursor (EC 2.5.1.-) (Fruit ripening specific protein pTOM5)	-	BRADI_4g01100v3	-1.25	0	sen-	HORVU5Hr1G005740	0	-1.23	tol-	Os12g0626400	0.99	0.75		Zm00001d012394	-2.69	0	sen-
-5.35628	Os01g0551000	Conserved hypothetical protein	X	BRADI_2g40900v3	-1.63	0	sen-	HORVU3Hr1G112600	0	0.94	tol+	Os01g0551000	0.48	0	sen+	Zm00001d044518	0	0.78	tol+
-5.28103	Os08g0434300	Similar to Malate dehydrogenase precursor (EC 1.1.1.37)	X	BRADI_3g37140v3	1.29	0	sen+	HORVU1Hr1G081550	0	-0.65	tol-	Os08g0434300	-0.44	0	sen-	Zm00001d032187	0	-1.18	tol-
-5.23057	Os09g0548400	Dimethylaniline monooxygenase%2C N-oxide-forming domain containing protein	-	BRADI_4g37110v3	-0.81	0	sen-	HORVU5Hr1G086670	-1.77	0	sen-	Os09g0548400	-1.03	-0.72		Zm00001d021444	-2.01	-0.66	ΔLFC>1
-5.19825	Os09g0426800	Homologue of WAX2/GL1%2C Synthesis of leaf cuticular wa	X	BRADI_4g30750v3	-0.99	0	sen-	HORVU5Hr1G063820	0	-0.65	tol-	Os09g0426800	0.66	0	sen+	Zm00001d020557	-2.23	0	sen-
-5.11938	Os11g0455500	Similar to Adenosylhomocysteinase	X	BRADI_4g19457v3	0.86	0	sen+	HORVU2Hr1G109370	1.41	0	sen+	Os11g0455500	-0.55	0	sen-	Zm00001d049239	0	-0.73	tol-
-5.00319	Os04g0414700	Photosystem I PsaO domain containing protein	X	BRADI_5g09530v3	-2.64	0	sen-	HORVU2Hr1G073370	0	-1.08	tol-	Os04g0414700	0	-1	tol-	Zm00001d003767	-2.45	0	sen-
-4.71155	Os07g0544800	Similar to Oxygen-evolving enhancer protein 3-2%2C chloroplast precurso	-	BRADI_1g25430v3	-3.28	0	sen-	HORVU0Hr1G003270	0	-0.92	tol-	Os07g0544800	-0.38	-1.17		Zm00001d006540	-2.32	0	sen-
-4.46676	Os08g0104600	Ferredoxin I%2C chloroplast precursor (Anti-disease protein 1)	X	BRADI_3g13160v3	-2.55	0	sen-	HORVU7Hr1G077740	0	-0.84	tol-	Os08g0104600	0.77	0	sen+	Zm00001d035001	-2.6	0	sen-
-4.26319	Os04g0459500	Similar to H0219H12.1 protein	X	BRADI_5g12330v3	-3.39	0	sen-	HORVU0Hr1G004830	0	-0.68	tol-	Os04g0459500	0.49	0	sen+	Zm00001d003429	-1.88	0	sen-
-4.24814	Os08g0435900	Similar to LHC I type IV chlorophyll binding protein (Fragment)	-	BRADI_3g36760v3	-2.53	0	sen-	HORVU5Hr1G066280	0	-1.05	tol-	Os08g0435900	-0.42	-0.87		Zm00001d032197	-1.36	0	sen-
-3.99765	Os02g0744000	Similar to NDF6 (NDH DEPENDENT FLOW 6)	X	BRADI_3g59490v3	-1.6	0	sen-	HORVU6Hr1G076040	0	-0.77	tol-	Os02g0744000	0	-0.87	tol-	Zm00001d018030	-1.43	0	sen-
-3.75539	Os05g0453300	Conserved hypothetical protein	X	BRADI_2g23580v3	-1.33	0	sen-	HORVU1Hr1G073010	0	-0.7	tol-	Os05g0453300	0	0.58	tol+	Zm00001d010066	-1.49	0	sen-
-3.34667	Os04g0444800	Ferric reductase-like transmembrane component family protein	-	BRADI_5g11147v3	-2.69	0	sen-	HORVU2Hr1G077650	-1.01	-1.03		Os04g0444800	1.12	1.2		Zm00001d003559	-2.83	0.84	sen-/tol+
3.14145	Os06g0528600	Aminopropyl transferase	X	BRADI_1g38687v3	-0.78	0	sen-	HORVU7Hr1G079430	0	1.06	tol+	Os06g0528600	0.4	0	sen+	Zm00001d046112	-0.83	0	sen-
3.62805	Os06g0486800	Similar to Formate dehydrogenase%2C mitochondrial precursor (EC 1.2.1.2) (NAD- dependent formate dehydrogenase) (FDH)	X	BRADI_1g42270v3	1.65	0	sen+	HORVU7Hr1G047700	0	0.9	tol+	Os06g0486800	0	-0.47	tol-	Zm00001d045965	0	-0.75	tol-
3.81598	Os06g0129400	Splicing variant of SPX-MFS protein	X	BRADI_1g49790v3	-2.13	-0.64	ΔLFC>1	HORVU7Hr1G011890	-0.8	0	sen-	Os06g0129400	0	0.61	tol+	Zm00001d036020	1.58	0	sen+
4.06447	Os04g0513400	Similar to Beta-glucosidase	-	BRADI_5g15540v3	-1.11	0	sen-	HORVU2Hr1G089050	0	2.24	tol+	Os04g0513400	1.17	1.33		Zm00001d025846	0	0.68	tol+
4.65224	Os03g0273800	HAD-superfamily hydrolase%2C subfamily IA%2C variant 3 domain containing protein	-	BRADI_1g66710v3	1.23	0	sen+	HORVU4Hr1G059860	0	-0.85	tol-	Os03g0273800	1.26	0.91		Zm00001d028601	-1.08	0	sen-
4.82314	Os04g0388700	Similar to OSIGBa0096P03.3 protein	-	BRADI_5g08190v3	-2.43	0	sen-	HORVU2Hr1G069980	0	0.56	tol+	Os04g0388700	-0.64	-0.57		Zm00001d025237	-1.76	0	sen-
4.85046	Os01g0803200	Cysteine proteinase inhibitor-	X	BRADI_2g52670v3	-0.65	0	sen-	HORVU3Hr1G078680	0	-1.88	tol-	Os01g0803200	0	-0.43	tol-	Zm00001d012561	1.35	0	sen+
4.94503	Os06g0670300	Homeodomain-like containing protein	-	BRADI_1g32370v3	-1.28	0	sen-	HORVU7Hr1G107670	3.05	0	sen+	Os06g0670300	-1.35	-1.42		Zm00001d046981	3.33	0	sen+
4.95089	Os01g0583100	Similar to Protein phosphatase 2C	-	BRADI_2g41950v3	2.46	0	sen+	HORVU3Hr1G050340	0	0.62	tol+	Os01g0583100	1.19	1.31		Zm00001d044301	1.14	0	sen+
4.96772	Os04g0508800	Similar to Retroelement pol polyprotein-like	X	BRADI_5g15261v3	-1.84	0	sen-	HORVU2Hr1G088110	0	-1.19	tol-	Os04g0508800	-0.98	0	sen-	Zm00001d025825	1.51	0	sen+
5.23619	Os02g0815700	Similar to D1 protease (Fragment)	X	BRADI_4g37555v3	-1.18	0	sen-	HORVU5Hr1G088200	-0.86	0	sen-	Os02g0815700	1.97	0	sen+	Zm00001d018470	-2.09	0.65	sen-/tol+
5.24093	Os03g0638200	Similar to Major facilitator superfamily protein%2C expressed	-	BRADI_1g14040v3	0.91	0	sen+	HORVU5Hr1G093390	0	0.75	tol+	Os03g0638200	1.2	0.75		Zm00001d033272	1.37	0	sen+
5.65391	Os08g0141400	Similar to mRNA%2C clone: RTFL01-03-I20	X	BRADI_3g14800v3	2.39	0	sen+	HORVU7Hr1G073050	1.61	0	sen+	Os08g0141400	-0.86	0	sen-	Zm00001d049597	1.78	0	sen+
5.8389	Os05g0455500	Similar to Delta-1-pyrroline-5-carboxylate synthetase	-	BRADI_2g23507v3	3	0	sen+	HORVU1Hr1G072780	1.23	0	sen+	Os05g0455500	1.11	0.63		Zm00001d010056	0.97	-0.63	sen+/tol-
5.91199	Os06g0716000	Protein of unknown function DUF668 family protein	X	BRADI_1g30110v3	-0.63	0	sen-	HORVU7Hr1G116880	0	-0.85	tol-	Os06g0716000	-1.05	0	sen-	Zm00001d014789	1.01	0	sen+
6.28165	Os02g0465900	ChaC-like protein family protein	X	BRADI_3g43137v3	0.9	0	sen+	HORVU6Hr1G012320	0	-1.25	tol-	Os02g0465900	-0.5	0	sen-	Zm00001d013845	-1.34	0	sen-
6.61212	Os04g0655300	Protein kinase%2C core domain containing protein	-	BRADI_5g24760v3	-1.14	0	sen-	HORVU2Hr1G111760	0	-1.88	tol-	Os04g0655300	-0.54	-0.46		Zm00001d026489	1.24	0	sen+
9.25145	Os02g0668000	Membrane protein%2C At2g17000%2C predicted domain containing protein	-	BRADI_3g51250v3	2.23	0	sen+	HORVU4Hr1G083980	-1.27	-0.92		Os02g0668000	1.73	0	sen+	Zm00001d017539	-2.37	0	sen-
11.8346	Os09g0532000	Senescence-inducible chloroplast protein%2C Activation of the chlorophll-degrading pathway during leaf senescenc	X	BRADI_4g36060v3	4.54	0	sen+	HORVU5Hr1G081500	3.18	0	sen+	Os09g0532000	0	0.88	tol+	Zm00001d006211	3.28	0	sen+
12.0494	Os04g0541700	Similar to Homeobox-leucine zipper protein HOX22	-	BRADI_5g17170v3	3.34	0	sen+	HORVU2Hr1G092710	0	0.73	tol+	Os04g0541700	2.18	1.8		Zm00001d002799	4.8	0	sen+
13.2415	Os06g0651200	Conserved hypothetical protein	-	BRADI_1g31100v3	3.47	0	sen+	HORVU7Hr1G113290	2.23	0	sen+	Os06g0651200	2.3	1.44		Zm00001d046824	1.85	0	sen+
13.3128	Os12g0428000	Similar to senescence-associated protein DIN1	X	BRADI_2g56037v3	1.05	0	sen+	HORVU6Hr1G000070	0	2.82	tol+	Os12g0428000	1.67	0	sen+	Zm00001d054093	0	1.03	tol+
15.2756	Os03g0268600	Similar to Protein phosphatase type 2C	-	BRADI_1g66920v3	5.22	0	sen+	HORVU4Hr1G060370	1.96	1.04		Os03g0268600	1.55	1.69		Zm00001d028574	4.08	0	sen+
15.3624	Os02g0669100	Dehydrin family protein	-	BRADI_3g51200v3	3.61	0	sen+	HORVU6Hr1G064620	0	-0.94	tol-	Os02g0669100	1.88	1.08		Zm00001d017547	3.31	0	sen+
25.6325	Os01g0794400	Thioredoxin domain 2 containing protein	-	BRADI_2g52317v3	6.25	0	sen+	HORVU3Hr1G077930	3.44	2.42	ΔLFC<-1	Os01g0794400	1.52	1.44		Zm00001d012591	4.21	0	sen+
45.2771	Os06g0246500	Similar to Pyruvate dehydrogenase E1 alpha subunit (EC 1.2.4.1)	-	BRADI_1g44480v3	5.79	0	sen+	HORVU7Hr1G040460	0	1.77	tol+	Os06g0246500	2.6	1.86		Zm00001d044748	2.07	0	sen+
80.737	Os05g0373900	Similar to Eukaryotic peptide chain release factor subunit 1 (eRF1) (Eukaryotic release factor 1) (TB3-1) (Cl1 protein)	-	BRADI_2g27180v3	4.21	0	sen+	HORVU1Hr1G057880	3.25	1.82	ΔLFC<-1	Os05g0373900	2.67	2.6		Zm00001d037868	4.05	0	sen+
	Os01g0117300	Similar to Receptor kinase LRK10	X	BRADI_2g39710v3	-1.17	0.56	sen-/tol+	HORVU1Hr1G002600	0	-1.34	tol-	Os01g0117300	-1.27	0	sen-	Zm00001d008465	0.91	0	sen+
	Os01g0175100	Kv1.4 voltage-gated K+ channel family protein	-	BRADI_2g04670v3	-1.91	0	sen-	HORVU3Hr1G023750	1.51	1.4		Os01g0175100	-1.15	-0.78		Zm00001d039648	1.03	0	sen+
	Os01g0188400	NADP-dependent malic enzyme%2C chloroplast precursor (EC 1.1.1.40) (NADP-ME)	-	BRADI_2g05620v3	-1.02	0	sen-	HORVU3Hr1G019790	0	-1.02	tol-	Os01g0188400	0.46	0.5		Zm00001d037961	0.98	0	sen+
	Os01g0227800	Similar to cDNA%2C clone: J075083L18%2C full insert sequence	X	BRADI_2g07597v3	-2.94	0	sen-	HORVU3Hr1G031020	0	-1.16	tol-	Os01g0227800	0.84	0	sen+	Zm00001d008985	2.39	0	sen+
	Os01g0600900	Chlorophyll a-b binding protein 2%2C chloroplast precursor (LHCII type I CAB-2) (LHCP)	-	BRADI_1g12130v3	-4.08	1.91	sen-/tol+	HORVU1Hr1G078380	-2.72	0	sen-	Os01g0600900	-0.73	-1.33		Zm00001d011285	-5.3	0	sen-
	Os01g0642000	Carboxylesterase%2C type B family protein	-	BRADI_2g44942v3	1.33	0	sen+	HORVU3Hr1G057530	-1.28	0	sen-	Os01g0642000	2.44	1.7		Zm00001d044088	1.25	0	sen+
	Os01g0733500	Similar to Dehydration-induced protein RD22-like protein 1	X	BRADI_2g49000v3	2.59	0	sen+	HORVU3Hr1G069650	2.94	0	sen+	Os01g0733500	1.21	0	sen+	Zm00001d043538	-1.7	0	sen-
	Os01g0846300	Similar to Protein phosphatase 2C	-	BRADI_2g54810v3	5.21	0	sen+	HORVU3Hr1G085930	1.7	1.1		Os01g0846300	1.13	1.09		Zm00001d012401	3	0.92	ΔLFC<-1
	Os01g0869900	Serine/threonine protein kinase%2C Hyperosmotic stress respons	-	BRADI_2g56267v3	2.4	0	sen+	HORVU3Hr1G082690	0	0.83	tol+	Os01g0869900	0.62	0.71		Zm00001d042695	0	-0.55	tol-
	Os01g0919400	Sucrose phosphate synthase%2C Sucrose synthesis in pollen germinatio	-	BRADI_2g58860v3	-2.14	0	sen-	HORVU3Hr1G093830	0	2.62	tol+	Os01g0919400	0.4	0.69		Zm00001d012036	-3.71	0	sen-
	Os02g0101500	Peroxisomal hydroxypyruvate reductase%2C NADH-dependent HPR%2C Photorespiratory metabolis	X	BRADI_3g00330v3	-1.12	0	sen-	HORVU6Hr1G000650	0	-1.08	tol-	Os02g0101500	0.41	0	sen+	Zm00001d014919	-0.91	0	sen-
	Os02g0201300	Conserved hypothetical protein	-	BRADI_3g07440v3	1.5	0	sen+	HORVU6Hr1G038250	2.21	0	sen+	Os02g0201300	0.85	1.02		Zm00001d015767	1.74	0	sen+
	Os02g0275200	Xyloglucan fucosyltransferase family protein	-	BRADI_3g10230v3	-3.36	0	sen-	HORVU1Hr1G091060	0	-0.89	tol-	Os02g0275200	-1.5	-1.06		Zm00001d053327	-1.47	0	sen-
	Os02g0556800	Similar to proline-rich family protein	-	BRADI_3g45840v3	-0.86	0	sen-	HORVU1Hr1G070290	0	-0.64	tol-	Os02g0556800	0.5	0	sen+	Zm00001d050748	-1.21	-0.79
	Os02g0588500	Hypothetical conserved gene	-	BRADI_3g47340v3	1.82	0	sen+	HORVU6Hr1G052420	-1.06	-1.22		Os02g0588500	1.08	0	sen+	Zm00001d017036	0	-2.02	tol-
	Os02g0626400	Phenylalanine ammonia-lyase (EC 4.3.1.5)	X	BRADI_3g49260v3	1.28	0	sen+	HORVU0Hr1G016330	0	-0.87	tol-	Os02g0626400	-0.88	1.61	sen-_tol+	Zm00001d017275	0	-0.9	tol-
	Os02g0710900	Heat shock protein Hsp70 family protein	X	BRADI_3g53100v3	1.04	0	sen+	HORVU6Hr1G001950	1.45	0	sen+	Os02g0710900	-1.3	0	sen-	Zm00001d017809	1.11	0	sen+
	Os02g0783625	Similar to Lysine ketoglutarate reductase/saccharopine dehydrogenase	X	BRADI_3g60160v3	2.81	0	sen+	HORVU6Hr1G083050	0	1.47	tol+	Os02g0783625	-0.93	0	sen-	Zm00001d052079	1.6	0	sen+
	Os03g0192700	Similar to Myo-inositol-1-phosphate synthase	X	BRADI_1g71667v3	-2.09	0	sen-	HORVU4Hr1G071730	-1.09	0	sen-	Os03g0192700	0	0.83	tol+	Zm00001d045455	0	1.04	tol+
	Os03g0238300	Endonuclease/exonuclease/phosphatase domain containing protein	X	BRADI_1g68680v3	-1.41	0	sen-	HORVU4Hr1G064440	0	-0.69	tol-	Os03g0238300	0	-0.56	tol-	Zm00001d047972	0	-1.96	tol-
	Os03g0297600	Streptomyces cyclase/dehydrase family protein	-	BRADI_1g65130v3	-8.09	-1.01	ΔLFC>1	HORVU4Hr1G055220	-3.62	-3.39		Os03g0297600	-2.05	-2.3		Zm00001d028793	-1.39	0	sen-
	Os03g0387900	Conserved hypothetical protein	-	BRADI_1g60846v3	-0.86	0	sen-	HORVU4Hr1G040290	-1.34	0	sen-	Os03g0387900	0.42	0.55		Zm00001d029378	0	0.61	tol+
	Os03g0583800	Mpv17/PMP22 family protein	-	BRADI_1g15450v3	-2.11	0	sen-	HORVU1Hr1G022840	-1.69	-1.61		Os03g0583800	0.61	0.65		Zm00001d013795	0	0.69	tol+
	Os03g0592500	Similar to Photosystem II type II chlorophyll a/b binding protein (Fragment)	X	BRADI_1g15290v3	-2.8	0	sen-	HORVU5Hr1G082420	-1.46	0	sen-	Os03g0592500	0	-0.73	tol-	Zm00001d006592	-1.82	0	sen-
	Os03g0700700	Similar to Lipoxygenase (Fragment)	X	BRADI_1g11670v3	1.35	0	sen+	HORVU4Hr1G005920	1.05	0	sen+	Os03g0700700	-0.76	0	sen-	Zm00001d013493	0.92	0	sen+
	Os03g0709300	Similar to Chemocyanin precursor (Basic blue protein) (Plantacyanin)	-	BRADI_1g11240v3	5.26	0	sen+	HORVU4Hr1G007220	2.47	1.58		Os03g0709300	2.6	0	sen+	Zm00001d033710	2.57	0	sen+
	Os03g0744700	Conserved hypothetical protein	X	BRADI_1g08907v3	-0.69	0	sen-	HORVU5Hr1G094400	-1.28	0	sen-	Os03g0744700	0	0.46	tol+	Zm00001d033985	-2.82	1.58	sen-/tol+
	Os03g0844900	Nucleic acid-binding%2C OB-fold-like domain containing protein	X	BRADI_1g01880v3	-1.5	0	sen-	HORVU5Hr1G120650	-0.79	0	sen-	Os03g0844900	0.46	0	sen+	Zm00001d034828	-1.9	0.63	sen-/tol+
	Os03g0849800	Nucleotide-diphospho-sugar transferase domain containing protein	X	BRADI_1g01750v3	1.94	0	sen+	HORVU5Hr1G121570	0	-0.7	tol-	Os03g0849800	0	1.07	tol+	Zm00001d012850	1.73	-1	sen+/tol-
	Os04g0136700	Cystathionine beta-synthase%2C core domain containing protein	-	BRADI_5g01180v3	-1.95	0	sen-	HORVU2Hr1G002600	0	1.43	tol+	Os04g0136700	1.66	1.23		Zm00001d004452	0	-1.6	tol-
	Os04g0379600	Defence response%2C Rin4 domain containing protein	-	BRADI_5g07380v3	-0.75	0	sen-	HORVU2Hr1G068630	0	-1.2	tol-	Os04g0379600	-1.67	-0.91		Zm00001d004022	0.84	0	sen+
	Os04g0390100	Heavy metal transport/detoxification protein domain containing protein	X	BRADI_5g08240v3	-1.77	0	sen-	HORVU2Hr1G070140	0	-1.36	tol-	Os04g0390100	1.38	0	sen+	Zm00001d003945	0	0.82	tol+
	Os04g0496000	Glucose/ribitol dehydrogenase family protein	X	BRADI_5g14530v3	-0.85	0	sen-	HORVU2Hr1G085650	0	-0.67	tol-	Os04g0496000	-1	0	sen-	Zm00001d025761	1.89	0	sen+
	Os04g0518400	Similar to Phenylalanine ammonia-lyase (Fragment)	-	BRADI_5g15830v3	1.93	0	sen+	HORVU2Hr1G089440	0	-2.17	tol-	Os04g0518400	0.74	0.96		Zm00001d003015	0	-1.8	tol-
	Os04g0578400	Similar to Beta-ring hydroxylase (Fragment)	-	BRADI_5g19130v3	-1.44	0	sen-	HORVU2Hr1G094160	0	-1.15	tol-	Os04g0578400	1	0.68		Zm00001d002589	-2.82	-1.15	ΔLFC>1
	Os04g0618200	Similar to cDNA clone:J013046D23%2C full insert sequence	X	BRADI_5g21930v3	1.59	0	sen+	HORVU2Hr1G104110	0	-0.71	tol-	Os04g0618200	-0.98	0	sen-	Zm00001d026311	1.27	0	sen+
	Os05g0148700	Armadillo-type fold domain containing protein	-	BRADI_3g10770v3	-1.79	0	sen-	HORVU6Hr1G050440	-1.06	0	sen-	Os05g0148700	0.43	0.58		Zm00001d048693	-0.97	0.77	sen-/tol+
	Os05g0171900	Glyoxalase/bleomycin resistance protein/dioxygenase domain containing protein	-	BRADI_2g34250v3	-1.16	0.8	sen-/tol+	HORVU1Hr1G025530	0	3.18	tol+	Os05g0171900	-0.93	-1.36		Zm00001d009797	1.49	0	sen+
	Os05g0177500	UDP-glucuronosyl/UDP-glucosyltransferase family protein	-	BRADI_2g34090v3	-1.5	0	sen-	HORVU1Hr1G025830	0	-1.72	tol-	Os05g0177500	1.41	1.51		Zm00001d007378	0	0.57	tol+
	Os05g0186300	Similar to NADP-malic enzyme	X	BRADI_2g33450v3	0.9	0	sen+	HORVU1Hr1G028030	0	-0.94	tol-	Os05g0186300	0.93	0	sen+	Zm00001d037693	1.29	0	sen+
	Os05g0375400	Beta-glucanase precursor	-	BRADI_2g27140v3	-3.8	0	sen-	HORVU1Hr1G057680	0	-2	tol-	Os05g0375400	0	-0.86	tol-	Zm00001d038049	0.94	1.26
	Os05g0429500	Similar to dienelactone hydrolase family protein	X	BRADI_2g24420v3	-1.81	0	sen-	HORVU1Hr1G075120	0	-0.78	tol-	Os05g0429500	0	-0.57	tol-	Zm00001d010204	-1.62	0	sen-
	Os05g0439400	Similar to Arm repeat containing protein	X	BRADI_2g24050v3	-1.11	0	sen-	HORVU1Hr1G074180	0	-1.41	tol-	Os05g0439400	0	-0.58	tol-	Zm00001d038280	0.81	0	sen+
	Os05g0454500	Conserved hypothetical protein	-	BRADI_2g23540v3	-3.16	0	sen-	HORVU1Hr1G072890	-1.52	-1.92		Os05g0454500	-0.78	-0.68		Zm00001d038352	0	-0.76	tol-
	Os05g0468900	Zinc finger%2C RING/FYVE/PHD-type domain containing protein	X	BRADI_2g22650v3	-2.95	0	sen-	HORVU1Hr1G070640	0	-1.66	tol-	Os05g0468900	-1.23	0	sen-	Zm00001d038420	2.29	0	sen+
	Os05g0501700	Rossmann-like alpha/beta/alpha sandwich fold domain containing protein	X	BRADI_2g20680v3	2.15	0	sen+	HORVU1Hr1G066100	1.78	0	sen+	Os05g0501700	1.3	0	sen+	Zm00001d038616	0.99	-1.01	sen+/tol-
	Os05g0550300	Similar to Lipid transfer protein (Fragment)	-	BRADI_2g17540v3	1.54	0	sen+	HORVU1Hr1G083160	2.28	1.98		Os05g0550300	5.53	3.62	ΔLFC<-1	Zm00001d038911	-3.32	0	sen-
	Os05g0561600	Protein of unknown function DUF1421 domain containing protein	-	BRADI_2g16680v3	-1.15	0	sen-	HORVU1Hr1G086930	-1.09	-1.36		Os05g0561600	0.72	0.77		Zm00001d038998	0	-0.68	tol-
	Os06g0111400	Guanine nucleotide binding protein (G-protein)%2C alpha subunit family protein	-	BRADI_1g50230v3	-0.73	0	sen-	HORVU7Hr1G006180	0	-0.45	tol-	Os06g0111400	-0.75	-0.45		Zm00001d035926	0.93	0	sen+
	Os06g0326400	Phosphofructokinase domain containing protein	-	BRADI_1g42630v3	-1.28	0	sen-	HORVU7Hr1G047000	-1.07	-0.86		Os06g0326400	0.88	0.7		Zm00001d045919	-4.02	1.57	sen-/tol+
	Os07g0178800	Similar to Low molecular mass early light-inducible protein HV90%2C chloroplast precursor (ELIP)	-	BRADI_1g55580v3	3.67	0	sen+	HORVU5Hr1G063590	-2.82	0	sen-	Os07g0178800	1.26	1.12		Zm00001d007827	0	-1.95	tol-
	Os07g0524900	Protein of unknown function DUF6%2C transmembrane domain containing protein	X	BRADI_1g25937v3	-1.6	0	sen-	HORVU2Hr1G046050	0	-1.36	tol-	Os07g0524900	1.62	0	sen+	Zm00001d021655	0	-2.32	tol-
	Os07g0557100	Delayed-early response protein/equilibrative nucleoside transporter family protein	-	BRADI_1g24960v3	-0.83	0	sen-	HORVU2Hr1G041590	-1.57	-0.81		Os07g0557100	-0.8	-0.91		Zm00001d021752	1.69	0	sen+
	Os07g0656700	Uncharacterised conserved protein UCP022348 domain containing protein	-	BRADI_1g19250v3	-1.36	0	sen-	HORVU2Hr1G023480	-0.83	0	sen-	Os07g0656700	0.53	0.82		Zm00001d007072	-1.15	0.7	sen-/tol+
	Os08g0141300	PapD-like domain containing protein	X	BRADI_3g14790v3	-0.93	0	sen-	HORVU7Hr1G073060	0	-1.03	tol-	Os08g0141300	-0.62	0	sen-	Zm00001d024661	0.74	0	sen+
	Os08g0157600	MYB transcription factor%2C Circadian cloc	-	BRADI_3g16515v3	-1.14	0	sen-	HORVU7Hr1G070870	-1.67	-1.24		Os08g0157600	1.89	2.43		Zm00001d024546	0	1.57	tol+
	Os08g0364900	Similar to Pirin-like protein	X	BRADI_3g21730v3	-0.76	0	sen-	HORVU1Hr1G086450	0	-1.25	tol-	Os08g0364900	-0.52	0	sen-	Zm00001d032363	1.23	0	sen+
	Os08g0404000	UDP-glucuronosyl/UDP-glucosyltransferase domain containing protein	-	BRADI_5g06377v3	-0.65	0	sen-	HORVU2Hr1G066790	1.15	0	sen+	Os08g0404000	3.26	3.24		Zm00001d004248	1.12	-0.86	sen+/tol-
	Os08g0434100	Similar to S-like ribonuclease (RNase PD2) (Fragment)	-	BRADI_3g37130v3	3.91	0	sen+	HORVU6Hr1G081950	1.66	0	sen+	Os08g0434100	2.28	2.23		Zm00001d032186	2.71	0	sen+
	Os08g0508800	Lipoxygenase%2C chloroplast precursor (EC 1.13.11.12)	X	BRADI_3g39980v3	-2.82	0	sen-	HORVU7Hr1G050660	0	-3.55	tol-	Os08g0508800	0	-2.31	tol-	Zm00001d031449	1.73	0	sen+
	Os09g0272000	Heavy metal transport/detoxification protein domain containing protein	-	BRADI_3g09910v3	1.12	0	sen+	HORVU5Hr1G052760	0	-0.99	tol-	Os09g0272000	1.79	1.89		Zm00001d019936	1.67	0	sen+
	Os09g0297000	Similar to Ferrochelatase	X	BRADI_4g27490v3	1.35	0	sen+	HORVU5Hr1G054060	0	-0.67	tol-	Os09g0297000	-0.49	0	sen-	Zm00001d005539	1.19	0	sen+
	Os09g0369400	Similar to predicted protein	-	BRADI_4g29030v3	-2.07	0	sen-	HORVU5Hr1G058300	-1.22	-1.24		Os09g0369400	-0.54	-1.21		Zm00001d005658	-2.65	0	sen-
	Os09g0379600	Similar to Homeobox-leucine zipper protein HOX25	-	BRADI_4g29380v3	1.99	0	sen+	HORVU5Hr1G059410	1.95	2.04		Os09g0379600	0.52	0	sen+	Zm00001d005692	0	-1.46	tol-
	Os09g0438000	Similar to RbohAOsp (Fragment)	X	BRADI_4g31130v3	0.92	0	sen+	HORVU5Hr1G062490	0	-1.28	tol-	Os09g0438000	0	1.46	tol+	Zm00001d020609	0	-0.68	tol-
	Os09g0460300	Alpha/beta hydrolase fold-3 domain containing protein	-	BRADI_4g32300v3	-4.08	0	sen-	HORVU5Hr1G068960	-1.19	-1.69		Os09g0460300	1.52	1.54		Zm00001d020732	-3.12	0	sen-
	Os09g0554300	Auxin efflux carrier domain containing protein	-	BRADI_4g37450v3	2.2	0	sen+	HORVU5Hr1G087880	0	-3.35	tol-	Os09g0554300	2.13	2.44		Zm00001d007109	1.56	0	sen+
	Os10g0320100	Similar to Flavonoid 3'-monooxygenase (EC 1.14.13.21) (Flavonoid 3'-hydroxylase) (Cytochrome P450 75B2)	-	BRADI_3g04750v3	1.98	0	sen+	HORVU1Hr1G094880	0	-8.12	tol-	Os10g0320100	0.99	0.7		Zm00001d017077	0	-1.98	tol-
	Os10g0462900	Similar to mitochondrial chaperonin-60	X	BRADI_3g28070v3	1.26	0	sen+	HORVU1Hr1G038680	1.31	0	sen+	Os10g0462900	0.77	0	sen+	Zm00001d032789	-1.21	0	sen-
	Os10g0530500	Similar to Glutathione-S-transferase Cla47	X	BRADI_3g31850v3	-2.05	0	sen-	HORVU1Hr1G049260	0	-2.82	tol-	Os10g0530500	0.46	0	sen+	Zm00001d049657	-1.51	0	sen-
	Os10g0578800	Similar to LrgB-like family protein%2C expressed	-	BRADI_3g34517v3	-1.97	0	sen-	HORVU1Hr1G051160	0	-1.35	tol-	Os10g0578800	2.03	1.49		Zm00001d030127	-2.26	0	sen-
	Os11g0145200	UDP-glucuronosyl/UDP-glucosyltransferase family protein	X	BRADI_4g42997v3	-2.14	0	sen-	HORVU5Hr1G042740	0	-0.95	tol-	Os11g0145200	-1.72	-0.71	ΔLFC>1	Zm00001d048688	-2.65	-0.51	ΔLFC>1
	Os11g0520500	Conserved hypothetical protein	X	BRADI_4g17917v3	-1.13	0	sen-	HORVU4Hr1G023390	0	-1.55	tol-	Os11g0520500	0	-1.24	tol-	Zm00001d049273	1.45	0	sen+
	Os11g0704600	Similar to Beta-1%2C3 glucanase precursor (EC 3.2.1.39)	-	BRADI_4g09230v3	2.08	0	sen+	HORVU4Hr1G027740	0.99	0	sen+	Os11g0704600	-0.72	-0.63		Zm00001d004768	1.22	0	sen+
	Os12g0169400	Cystathionine beta-synthase%2C core domain containing protein	-	BRADI_4g41527v3	-2.01	0	sen-	HORVU5Hr1G036160	0	-0.53	tol-	Os12g0169400	0.64	0.68		Zm00001d030612	-0.91	0	sen-
	Os12g0534100	Conserved hypothetical protein	X	BRADI_4g05890v3	-1.3	0	sen-	HORVU5Hr1G025950	0	-0.75	tol-	Os12g0534100	0	-0.72	tol-	Zm00001d023888	-1.15	0	sen-
	Os12g0601800	Similar to BZIP transcription factor family protein%2C expressed	-	BRADI_4g02570v3	-1.48	0	sen-	HORVU5Hr1G014170	-3.48	-1.95	ΔLFC>1	Os12g0601800	-1.91	-1.04		Zm00001d030995	-2.33	0	sen-

## Sheet: Table S4
	B. dystachion				H. vulgare				O. sativa				Z. mays				Oryza gene position
Rice ortholog	gene ID	logFC_sen	logFC_tol	Class	gene ID	logFC_sen	logFC_tol	Class	gene ID	logFC_sen	logFC_tol	Class	gene ID	logFC_sen	logFC_tol	Class	chr	start	stop	Oryza gene description
Os01g0101200									Os01g0101200		-0.96	tol-	Zm00001d040220	-2.5		sen-	1	62060	65537	23-diketo-5-methylthio-1-phosphopentane phosphatase domain containing protein
Os01g0101700	BRADI_2g03694v3	-1.05		sen-					Os01g0101700	0.72	0.71						1	82426	84095	Similar to chaperone protein dnaJ 20
Os01g0102000													Zm00001d040205	-1.86		sen-	1	89763	91465	Phosphoesterase family protein
Os01g0102300	BRADI_1g26880v3	-2.21		sen-					Os01g0102300	0.5		sen+	Zm00001d008394	-1.31		sen-	1	134300	135439	Thylakoid lumen protein Photosynthesis and chloroplast developmen
Os01g0102400									Os01g0102400	1.59	1.26						1	139826	141555	Histone-fold domain containing protein
Os01g0102500	BRADI_2g03670v3	0.64		sen+									Zm00001d040204	-1.58		sen-	1	141959	144554	Conserved hypothetical protein
Os01g0102600	BRADI_2g03680v3	-1.41		sen-									Zm00001d030688	-0.93		sen-	1	145603	147847	Shikimate kinase domain containing protein
Os01g0102700																	1	148085	150568	Translocon-associated beta family protein
Os01g0102850									Os01g0102850		-0.75	tol-					1	164577	168921	Similar to nitrilase 2
Os01g0102900	BRADI_2g03610v3	1.83		sen+					Os01g0102900	-1.38	-1.56						1	169390	170316	Light-regulated protein Regulation of light-dependent attachment of LEAF-TYPE FERREDOXIN-NADP+ OXIDOREDUCTASE (LFNR) to the thylakoid membran
Os01g0103000									Os01g0103000		-1.03	tol-					1	170798	173144	Snf7 family protein
Os01g0103100	BRADI_2g03560v3	2.91		sen+									Zm00001d040201	-1.55		sen-	1	178607	180575	TGF-beta receptor type I/II extracellular region family protein
Os01g0103900	BRADI_2g03487v3	-1.01		sen-													1	201944	206202	Polynucleotidyl transferase Ribonuclease H fold domain containing protein
Os01g0104200					HORVU3Hr1G014140	3.23		sen+					Zm00001d008399	1.96		sen+	1	216212	217345	No apical meristem (NAM) protein domain containing protein
Os01g0104400													Zm00001d040190	1.8		sen+	1	226897	229301	Ricin B-related lectin domain containing protein
Os01g0104600	BRADI_2g13320v3	-0.69		sen-													1	248828	256872	Homolog of Arabidopsis DE-ETIOLATED1 (DET1) Modulation of the ABA signaling pathway and ABA biosynthesis Regulation of chlorophyll conten
Os01g0104800	BRADI_2g13337v3	1.25		sen+	HORVU7Hr1G092560	0.81		sen+									1	261530	268145	Sas10/Utp3 family protein
Os01g0104900	BRADI_2g03437v3	-1.71		sen-													1	270179	275084	Transferase family protein
Os01g0105700									Os01g0105700	1.74		sen+					1	303233	306736	Basic helix-loop-helix dimerisation region bHLH domain containing protein
Os01g0105800									Os01g0105800	0.97		sen+	Zm00001d008405	1.01		sen+	1	306871	308842	Similar to Iron sulfur assembly protein 1
Os01g0106400					HORVU1Hr1G075160		-1.83	tol-	Os01g0106400	-0.7		sen-	Zm00001d040173		-1.19	tol-	1	327128	328450	Similar to Isoflavone reductase homolog IRL (EC 1.3.1.-)
Os01g0106500	BRADI_2g00590v3	1.1		sen+													1	331382	332345	Conserved hypothetical protein
Os01g0106600	BRADI_2g00600v3	1.55		sen+													1	332667	333689	Similar to Chitin-binding lectin 1 precursor (PL-I)
Os01g0106900									Os01g0106900		0.44	tol+	Zm00001d008427	-0.87		sen-	1	374728	380713	Similar to 1-deoxy-D-xylulose 5-phosphate reductoisomerase (Fragment)
Os01g0107700																	1	412625	415823	Similar to LIMONENE cyclase like protein
Os01g0107900	BRADI_2g00697v3	-0.9	0.65	sen-/tol+													1	416264	420497	Protein of unknown function DUF3506 domain containing protein
Os01g0108200	BRADI_3g03185v3	-0.74		sen-													1	441203	448951	Similar to Prolyl endopeptidase (EC 3.4.21.26) (Post-proline cleaving enzyme) (PE)
Os01g0108400	BRADI_2g00730v3	3.66		sen+	HORVU3Hr1G000170	5.02		sen+	Os01g0108400	1.26		sen+					1	455707	457425	Helix-loop-helix DNA-binding domain containing protein
Os01g0109300													Zm00001d040144	-1.24		sen-	1	498668	506233	Similar to predicted protein
Os01g0110100																	1	537710	543354	Phosphate (Pi) transporter Pi homeostasi
Os01g0110400	BRADI_2g00890v3	0.96		sen+									Zm00001d008432	1.65		sen+	1	549157	552574	Similar to Acetyl-CoA C-acetyltransferase
Os01g0110500									Os01g0110500		-1.36	tol-					1	554025	558015	Protein kinase core domain containing protein
Os01g0111100	BRADI_2g00950v3	-1.85	0.54	sen-/tol+	HORVU3Hr1G000900		-1.36	tol-	Os01g0111100	-0.64	-2.01	ΔLFC<-1	Zm00001d008440	-3.07		sen-	1	586445	587696	Cyclophilin-like domain containing protein
Os01g0111700					HORVU3Hr1G001060		-3.55	tol-	Os01g0111700	-2.61	-1.3	ΔLFC>1	Zm00001d008449		0.69	tol+	1	620572	621516	Conserved hypothetical protein
Os01g0111900									Os01g0111900		-1.19	tol-					1	625986	627009	Glutelin family protein
Os01g0112100	BRADI_2g01090v3	1.15		sen+													1	635325	639015	Conserved hypothetical protein
Os01g0112500													Zm00001d008455	1.27	0.74		1	648288	651869	Similar to Plakoglobin/armadillo/beta-catenin-like protein (Fragment)
Os01g0113300													Zm00001d040094	1.73		sen+	1	723693	726099	Similar to ARK protein (Fragment)
Os01g0114300									Os01g0114300	-1.04	-0.6						1	770332	773829	Similar to Receptor-like protein kinase (Fragment)
Os01g0114550									Os01g0114550	-1.84		sen-					1	782765	784932	Non-protein coding transcript
Os01g0115100									Os01g0115100	-0.78		sen-					1	804097	806932	Hypothetical conserved gene
Os01g0115600									Os01g0115600	-0.89	0.63	sen-/tol+					1	843530	847399	Similar to LRK14
Os01g0115700	BRADI_2g01180v3	-1.43		sen-													1	852249	854568	Similar to Receptor-like kinase
Os01g0115725									Os01g0115725	-1.51		sen-					1	852275	854570	Hypothetical protein
Os01g0115900									Os01g0115900	-0.61		sen-					1	865938	869298	Similar to Receptor-like protein kinase
Os01g0116900									Os01g0116900	-0.48		sen-					1	924451	956639	Protein kinase catalytic domain domain containing protein
Os01g0117100									Os01g0117100	-0.69		sen-					1	961799	965151	Similar to Receptor kinase LRK10
Os01g0117200									Os01g0117200	-1.21		sen-					1	969340	973327	Similar to ARK protein (Fragment)
Os01g0117266					HORVU0Hr1G039890		-1.49	tol-	Os01g0117266	-1.65		sen-					1	976766	977218	Conserved hypothetical protein
Os01g0117300	BRADI_2g39710v3	-1.17	0.56	sen-/tol+	HORVU1Hr1G002600		-1.34	tol-	Os01g0117300	-1.27		sen-	Zm00001d008465	0.91		sen+	1	979238	980546	Similar to Receptor kinase LRK10
Os01g0117450									Os01g0117450	-1.2		sen-					1	984536	986741	Hypothetical protein
Os01g0117500									Os01g0117500	-1.14		sen-					1	987676	990745	Similar to Receptor kinase LRK10
Os01g0117900	BRADI_2g01340v3	-2.93		sen-	HORVU3Hr1G002710		-0.87	tol-	Os01g0117900	0.69	0.53						1	1010259	1012400	Similar to nodulin-like protein
Os01g0118000									Os01g0118000		0.52	tol+	Zm00001d008491	1.79		sen+	1	1016065	1019435	Similar to Fructose-bisphosphate aldolase (EC 4.1.2.13) (Fragment)
Os01g0118400	BRADI_2g01380v3	-2.8		sen-					Os01g0118400	-2.56	-1.61		Zm00001d040075	2.34		sen+	1	1057177	1059852	Similar to HGA6
Os01g0120300	BRADI_2g01504v3	-1.24	0.72	sen-/tol+									Zm00001d008497	-2.75		sen-	1	1145920	1153828	Similar to EMB2369 (EMBRYO DEFECTIVE 2369)%3B ATP binding / aminoacyl-tRNA ligase/ leucine-tRNA ligase/ nucleotide binding
Os01g0120600													Zm00001d039519	0.88		sen+	1	1165737	1168396	Similar to Oxidoreductase NAD-binding domain containing protein expressed
Os01g0120800	BRADI_2g01550v3	0.68		sen+													1	1171902	1179370	Similar to Eukaryotic translation initiation factor 3 subunit 10 (eIF-3 theta) (Eukaryotic translation initiation factor 3 large subunit) (eIF3a)
Os01g0121100	BRADI_2g01570v3	-0.53		sen-													1	1183466	1186699	Similar to SLL2
Os01g0121300	BRADI_2g01590v3	1.97		sen+													1	1198687	1203502	Conserved hypothetical protein
Os01g0121600													Zm00001d040048	2.36		sen+	1	1223134	1223887	Conserved hypothetical protein
Os01g0121700													Zm00001d008512	-1.63		sen-	1	1224012	1230500	ABC transporter-like domain containing protein
Os01g0121800													Zm00001d040047	1.45		sen+	1	1232493	1236760	Glycosyl transferase family 14 protein
Os01g0122000									Os01g0122000	1.22		sen+					1	1249881	1251421	Conserved hypothetical protein
Os01g0122701					HORVU3Hr1G012260		1.24	tol+									1	1264968	1265273	Conserved hypothetical protein
Os01g0123900									Os01g0123900	-0.53	-0.68						1	1338241	1339098	Similar to Bowman-Birk type proteinase inhibitor (EBI)
Os01g0124000									Os01g0124000		-1.37	tol-	Zm00001d003304	2.88		sen+	1	1341368	1342277	Similar to Bowman Birk trypsin inhibitor
Os01g0125800									Os01g0125800	1.18		sen+					1	1413839	1418982	Actin-interacting WD40-repeat protein Actin turnove
Os01g0126200													Zm00001d040034	-1.29		sen-	1	1437163	1445599	Multicopper oxidas
Os01g0126600	BRADI_2g43797v3	2.94		sen+													1	1446849	1450473	Paralog of FACTOR OF DNA METHYLATION LIKE
Os01g0127300													Zm00001d008549		-0.48	tol-	1	1504037	1508057	SufBD family protein
Os01g0127400	BRADI_2g01890v3	-1.35	0.51	sen-/tol+									Zm00001d039987	-1.62		sen-	1	1508213	1510771	Protein of unknown function DUF3326 domain containing protein
Os01g0127500	BRADI_2g01900v3	-1.28		sen-													1	1513138	1514432	NAD(P)-binding domain containing protein
Os01g0127700									Os01g0127700	-1.27	-0.74						1	1518247	1521601	Conserved hypothetical protein
Os01g0127900	BRADI_2g01950v3	4.06		sen+													1	1534135	1539601	Mannose-6-phosphate isomerase domain containing protein
Os01g0128000	BRADI_2g01960v3	7.88		sen+													1	1549241	1551011	Myb transcription factor domain containing protein
Os01g0128200	BRADI_2g01980v3	3.09		sen+													1	1566147	1569467	Similar to Nuclease I
Os01g0128300	BRADI_2g01990v3	2.11		sen+					Os01g0128300	1.13		sen+					1	1569644	1570940	Similar to predicted protein
Os01g0128400	BRADI_2g02000v3	0.92		sen+									Zm00001d040010	1.12		sen+	1	1571479	1576596	Protein of unknown function DUF2359 TMEM214 domain containing protein
Os01g0129500	BRADI_2g02030v3	1.3		sen+													1	1641272	1644151	Protein of unknown function DUF1666 family protein
Os01g0130000																	1	1673503	1677066	Cation efflux protein family protein
Os01g0130200									Os01g0130200	0.56	1.09						1	1685427	1685810	Hypothetical conserved gene
Os01g0130400	BRADI_2g02070v3	2.02		sen+					Os01g0130400		-1.51	tol-					1	1698203	1703090	Similar to Alpha-xylosidase precursor (Fragment)
Os01g0130900	BRADI_2g02080v3	1.63		sen+									Zm00001d039993	-1.07		sen-	1	1712137	1712947	Conserved hypothetical protein
Os01g0131300									Os01g0131300	0.51	0.5						1	1738868	1739820	Conserved hypothetical protein
Os01g0131600													Zm00001d008546	-1.54		sen-	1	1746416	1748544	Hypothetical conserved gene
Os01g0132000									Os01g0132000	-1.55		sen-	Zm00001d008548	2.69	-2.87	sen+/tol-	1	1760310	1761065	Similar to Wound-induced protease inhibitor (WIP1)
Os01g0132100	BRADI_2g02160v3	-1.54		sen-													1	1765373	1768669	Leucine-rich repeat domain containing protein
Os01g0132500													Zm00001d008552	1.74		sen+	1	1781075	1782386	Protein of unknown function DUF1639 domain containing protein
Os01g0132766	BRADI_2g02190v3	-1.53		sen-									Zm00001d039977		-3.06	tol-	1	1801983	1803280	Zinc finger C2H2-like domain containing protein
Os01g0132800	BRADI_2g02200v3	-1.21		sen-													1	1813011	1817601	Peptidyl-tRNA hydrolase family protein
Os01g0133100	BRADI_2g02210v3	0.91		sen+													1	1834110	1836549	Conserved hypothetical protein
Os01g0133400	BRADI_2g02230v3	-1.62		sen-													1	1844263	1849102	Similar to Hexose transporter (Fragment)
Os01g0133500									Os01g0133500	1	0.75						1	1849887	1856251	Beta-lactamase-like domain containing protein
Os01g0134500													Zm00001d039965	-0.9		sen-	1	1888525	1892262	Similar to Delta-7-sterol-C5(6)-desaturase (EC 1.3.3.-) (Delta-7-C-5 sterol desaturase) (Delta7-sterol-C5-desaturase)
Os01g0134700					HORVU3Hr1G007290		-2.34	tol-	Os01g0134700	-2.76	-1.36	ΔLFC>1	Zm00001d008570	-4.24		sen-	1	1902741	1904902	Calmodulin binding protein-like family protein
Os01g0134800	BRADI_2g02330v3	5.77		sen+									Zm00001d039958	1.86		sen+	1	1906717	1908131	Similar to (14)-beta-xylan endohydrolase isoenzyme X-II (EC 3.2.1.8) (Fragment)
Os01g0135700	BRADI_2g02340v3	1.09		sen+													1	1931016	1931904	EF-HAND 2 domain containing protein
Os01g0135800																	1	1934117	1934924	Similar to Cytosolic class I small heat shock protein 3B (Fragment)
Os01g0135900					HORVU3Hr1G006930		-1.86	tol-	Os01g0135900	0.42		sen+	Zm00001d039941	-2.21		sen-	1	1941012	1941851	Similar to Cytosolic class I small heat shock protein 3C (Fragment)
Os01g0136000																	1	1944276	1944948	Similar to Cytosolic class I small heat-shock protein HSP17.5
Os01g0136200									Os01g0136200	1.71		sen+					1	1951930	1952681	16.9 kDa class I heat shock protein 1
Os01g0136400									Os01g0136400	-0.51		sen-					1	1957847	1967451	Protein kinase core domain containing protein
Os01g0136800																	1	1977423	1982484	Protein kinase core domain containing protein
Os01g0136900	BRADI_2g02477v3	-1.34		sen-													1	1984267	1986150	Similar to Stress-induced receptor-like kinase 2
Os01g0137200	BRADI_2g02432v3	-1.52		sen-													1	1993553	1994320	Hypothetical conserved gene
Os01g0137250																	1	1995550	1996857	Similar to Stress-induced receptor-like kinase 2
Os01g0137400	BRADI_2g02510v3	-0.61		sen-	HORVU3Hr1G007680		-0.74	tol-					Zm00001d039921		0.55	tol+	1	1988716	2003083	Protein kinase catalytic domain domain containing protein
Os01g0137700					HORVU3Hr1G007590		-1.88	tol-									1	2023879	2026177	Conserved hypothetical protein
Os01g0138500									Os01g0138500	1.37	1.36		Zm00001d039919	5.07		sen+	1	2059309	2062226	Protein of unknown function DUF789 family protein
Os01g0138800													Zm00001d008587	2.17		sen+	1	2071843	2073609	Peptidase C26 domain containing protein
Os01g0138900					HORVU3Hr1G007980		0.9	tol+					Zm00001d008588		-2.57	tol-	1	2074795	2077903	Mandelate racemase/muconate lactonizing enzyme family protein
Os01g0139200	BRADI_2g02600v3	0.59		sen+					Os01g0139200	-0.63		sen-					1	2084490	2087203	Octicosapeptide/Phox/Bem1p domain containing protein
Os01g0140400	BRADI_2g02700v3	-0.86		sen-									Zm00001d039911	-3.17		sen-	1	2131013	2137293	Similar to leucine-rich repeat protein-related
Os01g0141000	BRADI_2g02720v3	-3.27	-1.2	ΔLFC>1													1	2202278	2203787	AP2/ERF and B3 domain-containing protein Salt stress respons
Os01g0141600	BRADI_2g02740v3	-1.07		sen-													1	2245732	2250435	Protein of unknown function DUF647 family protein
Os01g0141700									Os01g0141700	0.56		sen+					1	2250838	2255073	Similar to predicted protein
Os01g0142100	BRADI_2g02770v3	-1.06	0.5	sen-/tol+					Os01g0142100	0.46		sen+	Zm00001d039900	-0.82		sen-	1	2266281	2271051	Peptidase M50 family protein
Os01g0142200																	1	2271163	2273724	Kinase binding protein CGI-121 domain containing protein
Os01g0142300	BRADI_2g02800v3	-1.76		sen-					Os01g0142300	0.64	0.85		Zm00001d008600	1.03	-1.77	sen+/tol-	1	2275067	2278872	Glycosyl transferase group 1 domain containing protein
Os01g0142500	BRADI_2g02810v3	1.05		sen+									Zm00001d008602	-0.73		sen-	1	2281913	2284775	Homeodomain-like containing protein
Os01g0142800									Os01g0142800	-1.18		sen-					1	2294904	2298329	Putative peptide transporter Long-distance translocation of dimethylarsinate to rice grai
Os01g0143300	BRADI_2g02870v3	1.5		sen+													1	2357871	2360437	Similar to Glycine-rich protein (Fragment)
Os01g0143800													Zm00001d008610	-3.42		sen-	1	2374541	2376761	Mitochondrial glycoprotein family protein
Os01g0144100	BRADI_2g02930v3	-2.53	0.61	sen-/tol+					Os01g0144100		-0.8	tol-	Zm00001d008612	-2.76		sen-	1	2383611	2385593	Similar to Thylakoid lumenal 15 kDa protein chloroplast precursor (p15)
Os01g0144200													Zm00001d039879	0.96		sen+	1	2386373	2388597	Vacuolar import and degradation protein Vid24 domain containing protein
Os01g0144900									Os01g0144900	1.11		sen+					1	2416643	2418825	Hypothetical protein
Os01g0145200									Os01g0145200	-1.24		sen-					1	2434793	2438772	Protein of unknown function DUF3681 domain containing protein
Os01g0147300																	1	2568051	2570029	Similar to membrane protein
Os01g0147700													Zm00001d008618		-0.81	tol-	1	2579565	2583575	Region of unknown function XH domain containing protein
Os01g0147800	BRADI_2g03160v3	-2.68		sen-													1	2584986	2587547	Domain of unknown function DUF547 domain containing protein
Os01g0147900	BRADI_2g03170v3	-1.13		sen-													1	2589835	2593568	Triosephosphate isomerase Glycolytic enzyme Key component in XA3/XA26-mediated resistance to Xo
Os01g0148050																	1	2605614	2612731	Hypothetical conserved gene
Os01g0149700	BRADI_1g47990v3	1.41		sen+	HORVU3Hr1G011710		1.08	tol+									1	2688460	2692024	Hypothetical conserved gene
Os01g0149800									Os01g0149800	0.87		sen+					1	2693231	2695079	Metallothionein-like protein type 2
Os01g0149900													Zm00001d039858	1.49	0.55		1	2699128	2703491	Conserved hypothetical protein
Os01g0150000					HORVU3Hr1G013790		-0.55	tol-									1	2707624	2711422	Similar to Synaptic glycoprotein SC2
Os01g0151100									Os01g0151100	-0.47		sen-					1	2765779	2768602	HSP20-like chaperone domain containing protein
Os01g0151200	BRADI_2g03350v3	-0.87		sen-									Zm00001d008625	-1.33		sen-	1	2770142	2774609	Similar to Inner membrane protein ALBINO3 chloroplast precursor. Splice isoform 2
Os01g0151500																	1	2783189	2790377	Similar to GGT4 (GAMMA-GLUTAMYL TRANSPEPTIDASE 4)%3B gamma-glutamyltransferase/ glutathione gamma-glutamylcysteinyltransferase
Os01g0151600													Zm00001d039851	1.01		sen+	1	2791418	2795857	Conserved hypothetical protein
Os01g0151700					HORVU3Hr1G013970	-1.38		sen-	Os01g0151700	1.03	0.88		Zm00001d039848	-1.48	1.18	sen-/tol+	1	2800516	2803701	Similar to Short-chain dehydrogenase Tic32
Os01g0151900																	1	2805586	2808152	Pentatricopeptide repeat domain containing protein
Os01g0152000																	1	2810313	2815017	Protein kinase core domain containing protein
Os01g0152500									Os01g0152500	1.01		sen+					1	2826116	2828930	Hypothetical conserved gene
Os01g0152687																	1	2835281	2836233	Serine-threonine/tyrosine-protein kinase domain containing protein
Os01g0152800									Os01g0152800	1.45	1.3						1	2839934	2843512	Protein kinase core domain containing protein
Os01g0152900									Os01g0152900	0.67		sen+					1	2844503	2845212	Similar to Histone H2B.1
Os01g0153250													Zm00001d039808	-1.3		sen-	1	2864276	2867341	Hypothetical conserved gene
Os01g0153800	BRADI_2g27300v3	2.28		sen+									Zm00001d008634	-2		sen-	1	2896841	2897944	Similar to gibberellin receptor GID1L2
Os01g0154950									Os01g0154950	1.38		sen+					1	2954510	2956849	Hypothetical gene
Os01g0155200									Os01g0155200	-0.89		sen-					1	2962422	2964972	Similar to H0525E10.8 protein
Os01g0155500									Os01g0155500		0.47	tol+					1	2982542	2986094	Protein kinase catalytic domain domain containing protein
Os01g0158100													Zm00001d008641	-1.27		sen-	1	3052241	3053151	Pentatricopeptide repeat containing protein
Os01g0158200									Os01g0158200		0.58	tol+	Zm00001d008642	-1.07		sen-	1	3054481	3057198	Similar to Serine carboxypeptidase II-1 precursor (EC 3.4.16.6) (CP-MII.1) (Fragment)
Os01g0158400													Zm00001d008646	1.65		sen+	1	3058564	3059717	Galactose-binding like domain containing protein
Os01g0158900									Os01g0158900	-1.2	-0.86						1	3085452	3090887	Zinc finger NF-X1-type domain containing protein
Os01g0159200													Zm00001d039770		-6.27	tol-	1	3097415	3098160	Similar to Fasciclin-like protein FLA18
Os01g0159300									Os01g0159300	-0.57		sen-	Zm00001d039769	1.71		sen+	1	3100294	3105226	Zinc finger RING/FYVE/PHD-type domain containing protein
Os01g0159400									Os01g0159400		-0.57	tol-	Zm00001d039768	0.79		sen+	1	3108117	3113940	Similar to Acyl-coenzyme A oxidase 4 peroxisomal (EC 1.3.3.6) (AOX 4) (Short- chain acyl-CoA oxidase) (SAOX) (AtCX4) (G6p) (AtG6)
Os01g0159800									Os01g0159800	2.16		sen+					1	3129056	3130722	Similar to DNA binding protein
Os01g0160100	BRADI_2g03840v3	2.59		sen+									Zm00001d008651	1.65		sen+	1	3136320	3140217	Similar to Pyruvate decarboxylase isozyme 2 (EC 4.1.1.1) (PDC) (Fragment)
Os01g0160700					HORVU7Hr1G006590		-3.63	tol-									1	3182139	3185207	Leucine-rich repeat N-terminal domain containing protein
Os01g0160800	BRADI_1g63700v3	1.36		sen+													1	3189117	3190330	Similar to Protein synthesis inhibitor II (EC 3.2.2.22) (Ribosome-inactivating protein II) (rRNA N-glycosidase)
Os01g0161000									Os01g0161000		-0.63	tol-					1	3201220	3204252	Hypothetical conserved gene
Os01g0162300									Os01g0162300	-1.19		sen-					1	3256822	3257901	Leucine-rich repeat plant specific containing protein
Os01g0162800									Os01g0162800	-1.46		sen-					1	3272839	3276375	Hypothetical conserved gene
Os01g0163000									Os01g0163000		1.33	tol+					1	3283266	3286357	Leucine-rich repeat N-terminal domain containing protein
Os01g0164500	BRADI_2g03960v3	1.29		sen+													1	3328572	3331963	Similar to ATP-dependent RNA helicase-like protein
Os01g0164600	BRADI_2g03970v3	-0.61		sen-									Zm00001d039745	-2.08		sen-	1	3332952	3336035	Protein phosphatase 2C-related domain containing protein
Os01g0164800					HORVU3Hr1G015880		0.75	tol+					Zm00001d024953	-0.86		sen-	1	3343531	3346705	Breast cancer type 2 susceptibility protein domain containing protein
Os01g0166100	BRADI_2g04070v3	1.02		sen+					Os01g0166100		0.62	tol+					1	3397441	3400487	Similar to Ca(2+)-dependent nuclease
Os01g0166300	BRADI_2g04076v3	-1.33		sen-													1	3402088	3403488	Similar to nuclease
Os01g0166500	BRADI_2g04090v3	-1.17		sen-													1	3414866	3415943	Conserved hypothetical protein
Os01g0166700													Zm00001d039719	-1		sen-	1	3422373	3425500	Saposin family protein
Os01g0166800									Os01g0166800	1.07		sen+					1	3425794	3429573	Similar to ETG1 (E2F TARGET GENE 1)
Os01g0167100									Os01g0167100		0.84	tol+					1	3431609	3433317	Hypothetical protein
Os01g0167500	BRADI_2g04130v3	0.66		sen+													1	3446940	3450180	Protein of unknown function DUF250 domain containing protein
Os01g0167800	BRADI_2g04170v3	-1.62		sen-													1	3467858	3472105	Conserved hypothetical protein
Os01g0167900													Zm00001d039712	1.77		sen+	1	3473846	3477048	KIP1-like domain containing protein
Os01g0168100	BRADI_2g04180v3	1.52		sen+													1	3479396	3484579	KIP1-like domain containing protein
Os01g0168600													Zm00001d039702	0.99		sen+	1	3511944	3515900	Similar to predicted protein
Os01g0169500																	1	3559761	3574278	Armadillo-type fold domain containing protein
Os01g0169800													Zm00001d008700	-2.32		sen-	1	3577473	3581859	Tryptophan aminotransferase Indole-3-acetic acid (IAA) biosynthesi
Os01g0170000	BRADI_2g04310v3	-2.11		sen-									Zm00001d039685	-1.45		sen-	1	3598451	3599668	Raffinose synthase family protein
Os01g0170051									Os01g0170051	0.73		sen+					1	3598662	3601908	Hypothetical protein
Os01g0170300	BRADI_2g04330v3	3.67		sen+													1	3621211	3625338	Serine/threonine protein kinase-related domain containing protein
Os01g0170900													Zm00001d008722	-2.49		sen-	1	3665042	3666044	Conserved hypothetical protein
Os01g0171000													Zm00001d039678	-1.86		sen-	1	3667476	3673008	BRASSINOSTEROID INSENSITIVE 1-associated receptor kinase 1 precursor (EC 2.7.1.37) (BRI1-associated receptor kinase 1) (Somatic embryogenesis receptor-like kinase 3)
Os01g0171800									Os01g0171800	0.77	0.66						1	3696155	3699718	Conserved hypothetical protein
Os01g0172100					HORVU3Hr1G024590		-1.84	tol-					Zm00001d039674		-1.11	tol-	1	3711212	3713653	Similar to Triose phosphate/phosphate translocator non-green plastid chloroplast precursor (CTPT)
Os01g0172200	BRADI_2g04460v3	0.47		sen+													1	3713740	3718631	DNA/RNA helicase DEAD/DEAH box type N-terminal domain containing protein
Os01g0172300	BRADI_2g04471v3	-1.09		sen-													1	3720138	3723145	Conserved hypothetical protein
Os01g0172400	BRADI_2g04480v3	1.27		sen+									Zm00001d039670	1.1		sen+	1	3724667	3728791	Similar to Phospholipase D alpha 1
Os01g0172600	BRADI_2g04490v3	1.81		sen+													1	3732525	3734022	Similar to electron carrier/ heme binding / peroxidase
Os01g0172800	BRADI_2g04510v3	0.99		sen+					Os01g0172800	0.66		sen+					1	3735961	3736782	Embryo-specific 3 family protein
Os01g0173000	BRADI_2g04530v3	-0.82		sen-									Zm00001d039667	-2.29		sen-	1	3737904	3742067	Putative thiol-disulphide oxidoreductase DCC domain containing protein
Os01g0173100																	1	3742778	3744461	Alba DNA/RNA-binding protein family protein
Os01g0173900					HORVU3Hr1G085890	2.14		sen+									1	3804672	3810720	Similar to MRP-like ABC transporter
Os01g0174000									Os01g0174000	0.5		sen+					1	3811287	3812735	Similar to BZIP transcription factor (Fragment)
Os01g0174100	BRADI_2g04597v3	-2.18		sen-													1	3818050	3818753	Conserved hypothetical protein
Os01g0174500	BRADI_2g04620v3	1.02		sen+													1	3827045	3830326	Metridin-like ShK toxin domain containing protein
Os01g0174700									Os01g0174700	1.01		sen+					1	3835129	3837642	Similar to Akt (Fragment)
Os01g0175100	BRADI_2g04670v3	-1.91		sen-	HORVU3Hr1G023750	1.51	1.4		Os01g0175100	-1.15	-0.78		Zm00001d039648	1.03		sen+	1	3855147	3856033	Kv1.4 voltage-gated K+ channel family protein
Os01g0175600	BRADI_2g04690v3	-3.39		sen-													1	3878164	3884017	Boron (B) transporte
Os01g0175700									Os01g0175700	0.69	1.9	ΔLFC>1					1	3894296	3898729	Boron (B) transporte
Os01g0175850	BRADI_1g45090v3	-1.48		sen-	HORVU3Hr1G023400		-2.13	tol-									1	3914804	3916283	UDP-glucuronosyl/UDP-glucosyltransferase domain containing protein
Os01g0176100	BRADI_2g04720v3	3.54		sen+	HORVU3Hr1G023230	2.3	-2.32	sen+/tol-					Zm00001d039642	3.09		sen+	1	3921356	3923134	UDP-glucuronosyl/UDP-glucosyltransferase family protein
Os01g0176700	BRADI_2g04810v3	-1.05		sen-													1	3953043	3955442	Myb-like DNA-binding domain SHAQKYF class domain containing protein
Os01g0178000	BRADI_2g04860v3	-0.64		sen-					Os01g0178000	-0.55		sen-					1	4051885	4057571	Pyridoxal phosphate-dependent transferase major region subdomain 1 domain containing protein
Os01g0178200	BRADI_2g04890v3	1.07		sen+													1	4064068	4066014	Similar to integral membrane family protein
Os01g0178400																	1	4068636	4070331	Similar to Protein phosphatase 2A B'kappa subunit
Os01g0178500	BRADI_2g04910v3	-1.72		sen-					Os01g0178500	0.96	0.95		Zm00001d008749	-1.41		sen-	1	4073916	4076438	A member of rice Aux/IAA family Cross-talk of auxin and brassinosteroid signaling pathways Plant morphogenesi
Os01g0179000													Zm00001d039615		-3.11	tol-	1	4110402	4112126	Transferase family protein
Os01g0179200									Os01g0179200		-0.57	tol-					1	4118041	4122224	Syntaxin N-terminal domain containing protein
Os01g0179600	BRADI_2g05050v3	-3.28		sen-	HORVU3Hr1G021810		-2.29	tol-					Zm00001d008764	-2.11		sen-	1	4153077	4154674	UDP-glucuronosyl/UDP-glucosyltransferase family protein
Os01g0179800	BRADI_2g05070v3	-1.68		sen-	HORVU3Hr1G021750	-1.14		sen-	Os01g0179800	0.48		sen+					1	4167514	4173240	TMS membrane protein/tumour differentially expressed protein family protein
Os01g0180050													Zm00001d038722	-3.41		sen-	1	4180207	4181178	Hypothetical protein
Os01g0180300	BRADI_2g05130v3	-1.4		sen-					Os01g0180300		-0.69	tol-	Zm00001d039598	-1.2		sen-	1	4208556	4213302	Lipoprotein type 6 family protein
Os01g0180400	BRADI_2g05140v3	1.04		sen+													1	4215038	4217099	Protein of unknown function DUF581 domain containing protein
Os01g0180700													Zm00001d039595	1.07		sen+	1	4245421	4249851	Hypothetical conserved gene
Os01g0180800									Os01g0180800	0.75		sen+					1	4253845	4259581	Heat shock protein Hsp70 family protein
Os01g0182100									Os01g0182100	-0.64		sen-					1	4306924	4309933	Protein of unknown function DUF1618 domain containing protein
Os01g0182200													Zm00001d048959	0.67		sen+	1	4313678	4315834	Similar to cDNA clone:001-208-D07 full insert sequence
Os01g0182400	BRADI_2g05218v3	-1.12		sen-	HORVU3Hr1G021310		0.56	tol+									1	4322736	4326342	Conserved hypothetical protein
Os01g0182600									Os01g0182600	-0.58	-0.42						1	4329362	4338486	Orthologue of the Arabidopsis GIGANTEA Regulation of circadian rhythm and flowering time Photoperiodic control of flowering Osmotic stress respons
Os01g0183000	BRADI_2g05250v3	1.91		sen+													1	4395060	4397438	Similar to GmCK3p (EC 2.7.1.32) (Fragment)
Os01g0183100	BRADI_1g04226v3	0.62		sen+									Zm00001d036359	-1.18		sen-	1	4397653	4401942	Cytochrome cd1-nitrite reductase-like C-terminal haem d1 domain containing protein
Os01g0183300																	1	4402668	4407292	Endonuclease/exonuclease/phosphatase domain containing protein
Os01g0184000													Zm00001d039568	-1.12		sen-	1	4444670	4448384	NUC156 family protein
Os01g0184100																	1	4449070	4449876	Class II small heat shock protein Positive regulation in both Xoo resistance and heat/salt toleranc
Os01g0185200									Os01g0185200	-0.6		sen-	Zm00001d008846	-1.01		sen-	1	4514356	4520604	Similar to glutaminyl-tRNA synthetase
Os01g0185300					HORVU3Hr1G020230		-1.59	tol-									1	4528237	4532862	Transferase family protein
Os01g0185900													Zm00001d008794	3.77		sen+	1	4566304	4568589	Similar to WRKY 1 (Fragment)
Os01g0186000													Zm00001d008793	1.73	1.5		1	4572565	4573271	Similar to WRKY transcription factor 10
Os01g0186200	BRADI_2g05520v3	0.54		sen+													1	4581254	4584592	Similar to Phototropin
Os01g0186600									Os01g0186600	-2.61		sen-					1	4614891	4615825	Conserved hypothetical protein
Os01g0187400																	1	4673407	4684765	Similar to glycine-rich protein
Os01g0187900	BRADI_2g05590v3	1.02		sen+													1	4714730	4718746	Similar to Transcription factor MYBS2
Os01g0188100					HORVU3Hr1G019820		-0.9	tol-	Os01g0188100	1.31	1.44						1	4726734	4731142	Isopenicillin N synthase family protein
Os01g0188400	BRADI_2g05620v3	-1.02		sen-	HORVU3Hr1G019790		-1.02	tol-	Os01g0188400	0.46	0.5		Zm00001d037961	0.98		sen+	1	4739271	4744472	NADP-dependent malic enzyme chloroplast precursor (EC 1.1.1.40) (NADP-ME)
Os01g0190300					HORVU3Hr1G019750		-1.44	tol-					Zm00001d039513	-1.92		sen-	1	4816831	4818958	Similar to Auxin-responsive protein IAA26 (Indoleacetic acid-induced protein 26) (Phytochrome-associated protein 1)
Os01g0190400																	1	4820155	4823129	Similar to Hexokinase
Os01g0190500													Zm00001d008819		2.34	tol+	1	4826590	4828733	IQ calmodulin-binding region domain containing protein
Os01g0191100	BRADI_5g09212v3	0.92		sen+									Zm00001d001899	-1.45		sen-	1	4852435	4854387	Similar to Acidic ribosomal protein P2a-4 (Fragment)
Os01g0191200									Os01g0191200	0.47		sen+					1	4872158	4873806	Similar to Acid phosphatase
Os01g0191300																	1	4879215	4885840	Similar to NAC-type transcription factor
Os01g0191700									Os01g0191700	0.49		sen+	Zm00001d039499	-1.06		sen-	1	4905609	4909339	Similar to Pyrophosphate-fructose-6-phosphate 1-phosphotransferase-like protein (Pyrophosphate-dependent phosphofructo-1-kinase-like protein)
Os01g0191800																	1	4909990	4913696	Similar to Aurora kinase
Os01g0192000	BRADI_2g05750v3	1.15		sen+					Os01g0192000	0.73	1.21						1	4949133	4951123	CCCH-type zinc finger protein Negative regulator for leaf senescenc
Os01g0192300	BRADI_2g05760v3	1.39		sen+					Os01g0192300	0.74	1.26		Zm00001d008808		1.12	tol+	1	4971466	4973555	Similar to I-box binding factor (Fragment)
Os01g0192600													Zm00001d039488	-2.62		sen-	1	4982182	4985143	Ndr family protein
Os01g0192900	BRADI_2g05790v3	2.52		sen+													1	5002454	5004321	1-aminocyclopropane-1-carboxylate synthase family protein
Os01g0193400																	1	5016279	5020150	TNFR/CD27/30/40/95 cysteine-rich region domain containing protein
Os01g0193600													Zm00001d039477	-1.45		sen-	1	5021104	5025704	Methyltransferase small domain containing protein
Os01g0194000	BRADI_2g05832v3	1.06		sen+									Zm00001d039472	1.48		sen+	1	5037239	5039252	Conserved hypothetical protein
Os01g0194300	BRADI_2g05870v3	1.34		sen+	HORVU3Hr1G019230		-1.99	tol-	Os01g0194300	-1.21	-0.58						1	5060605	5065209	Ankyrin-repeat protein Herbivore-induced defense response Blast disease resistanc
Os01g0194600	BRADI_2g05880v3	2.06		sen+									Zm00001d008843	2.41		sen+	1	5085833	5086504	Thioredoxin fold domain containing protein
Os01g0195200	BRADI_2g05910v3	1.53		sen+									Zm00001d039465	-2.79		sen-	1	5109949	5112457	Similar to Serine/threonine-protein kinase PBS1 (EC 2.7.1.37) (AvrPphB susceptible protein 1)
Os01g0195400													Zm00001d008850	1.76		sen+	1	5131629	5132915	Harpin-induced 1 domain containing protein
Os01g0196600	BRADI_2g05970v3	-0.76		sen-									Zm00001d039454	0.97		sen+	1	5218573	5220335	Similar to 260 kDa major acidic fibroblast growth factor-stimulated phosphoprotein (Fragment)
Os01g0197100	BRADI_2g05980v3	-2		sen-													1	5236623	5244520	Cytochrome P450 Brassinosteroids biosynthesis Regulation of plant architectur
Os01g0197350									Os01g0197350		-0.72	tol-					1	5256634	5257053	Hypothetical genes
Os01g0197400	BRADI_2g06010v3	-0.65		sen-													1	5258298	5260964	Conserved hypothetical protein
Os01g0197900									Os01g0197900	1.41		sen+					1	5288136	5292958	RNA-dependent RNA polymerase eukaryotic-type domain containing protein
Os01g0198100									Os01g0198100		0.95	tol+					1	5320625	5324478	RNA-dependent RNA polymerase eukaryotic-type domain containing protein
Os01g0199400									Os01g0199400	1.14	0.83		Zm00001d039416	1.62		sen+	1	5389837	5394412	Alpha/beta hydrolase family protein
Os01g0199700	BRADI_2g06150v3	-3.75		sen-													1	5398321	5402018	Protein of unknown function DUF1677 plant domain containing protein
Os01g0199900													Zm00001d037818	-1.29		sen-	1	5406050	5412737	Similar to Phosphoribosylaminoimidazole carboxylase catalytic subunit (EC 4.1.1.21) (AIR carboxylase) (AIRC)
Os01g0200200					HORVU3Hr1G027060		-6.99	tol-									1	5424059	5424581	Protein of unknown function DUF1677 plant domain containing protein
Os01g0200300																	1	5426582	5429390	Similar to Homeobox-leucine zipper protein HOX29
Os01g0200350									Os01g0200350	3.41		sen+					1	5426719	5431404	Hypothetical protein
Os01g0200600	BRADI_2g06180v3	3.76		sen+													1	5454772	5455667	Similar to Avr9/Cf-9 rapidly elicited protein 111A
Os01g0200700					HORVU3Hr1G026920	-0.97		sen-									1	5478545	5479749	Similar to Metallothionein-like protein type 3 (MT-3) (MWMT3)
Os01g0201200					HORVU3Hr1G026870	-1.09	-0.92		Os01g0201200		0.69	tol+	Zm00001d039427	1.31		sen+	1	5510522	5514454	Similar to Protein kinase
Os01g0201600																	1	5549651	5551003	Virulence factor pectin lyase fold family protein
Os01g0201900	BRADI_2g06340v3	-0.89		sen-													1	5591697	5596237	Conserved hypothetical protein
Os01g0202500	BRADI_2g06370v3	1.37		sen+					Os01g0202500	-1.28	-1.07		Zm00001d039437	-0.72		sen-	1	5639835	5641475	Similar to B-box zinc finger family protein
Os01g0203800	BRADI_2g06420v3	0.79		sen+													1	5699652	5707756	Protein of unknown function DUF641 plant domain containing protein
Os01g0204000																	1	5718902	5724184	DNA polymerase subunit Cdc27 domain containing protein
Os01g0205100													Zm00001d039448	-1.71		sen-	1	5760486	5764602	WD40 repeat-like domain containing protein
Os01g0205200	BRADI_2g06450v3	-2.05		sen-									Zm00001d031535	-1.63		sen-	1	5764652	5766659	Pentatricopeptide repeat domain containing protein
Os01g0205300	BRADI_2g06460v3	-3.23		sen-													1	5768175	5769203	Similar to rho termination factor N-terminal domain containing protein
Os01g0205700													Zm00001d039407	0.81		sen+	1	5774293	5776922	Similar to Shaggy-like kinase (Fragment)
Os01g0206700									Os01g0206700	2.03		sen+					1	5809589	5811510	Similar to Serine/threonine protein kinase (CBL-interacting protein kinase 20)
Os01g0207200																	1	5828556	5830828	Similar to Peptide-N4-(N-acetyl-beta-glucosaminyl)asparagine amidase A (EC 3.5.1.52) (PNGase A) (Glycopeptide N-glycosidase) (N-glycanase) [Contains: Peptide-N4-(N-acetyl-beta-glucosaminyl)asparagine amidase A light chain (PNGase A small chain) (PNGase A subunit B)%3B Peptide-N4- (N-acetyl-beta-glucosaminyl)asparagine amidase A heavy chain (PNGase A large chain) (PNGase A subunit A)]
Os01g0207400													Zm00001d008905	-3.07		sen-	1	5837660	5838639	Similar to peptide-N4-asparagine amidase A
Os01g0207700	BRADI_2g39677v3	1.4		sen+													1	5848166	5848945	Drug/metabolite transporter domain containing protein
Os01g0207900									Os01g0207900		1.69	tol+					1	5856444	5857920	Similar to nodulin-like protein
Os01g0208700									Os01g0208700	0.45		sen+					1	5899561	5909560	Similar to Phosphoenolpyruvate carboxylase (Fragment)
Os01g0209000																	1	5911506	5916779	Alg9-like mannosyltransferase family protein
Os01g0209400																	1	5934586	5939516	Nucleotide-binding alpha-beta plait domain containing protein
Os01g0209700	BRADI_2g06670v3	3.95		sen+	HORVU3Hr1G029010		-2.87	tol-					Zm00001d008909	1.51		sen+	1	5968819	5972489	Similar to GA 2-oxidase 5
Os01g0209800	BRADI_2g06700v3	-1.66		sen-													1	5983626	5985875	Similar to Cationic amino acid transporter (Fragment)
Os01g0210500									Os01g0210500	0.59		sen+					1	6007921	6009027	Similar to SOUL-like protein
Os01g0210600									Os01g0210600		-0.54	tol-					1	6010862	6011818	Protein of unknown function DUF538 family protein
Os01g0211600					HORVU3Hr1G028620	2.85	-2.98	sen+/tol-									1	6076731	6078239	Cytochrome P450 family protein
Os01g0212100	BRADI_2g06800v3	0.7		sen+													1	6112811	6132696	DEAD-like helicase N-terminal domain containing protein
Os01g0212700	BRADI_2g06840v3	1.88		sen+													1	6172143	6173186	Similar to RING-H2 finger protein ATL2K
Os01g0213400					HORVU3Hr1G028280		-1.2	tol-	Os01g0213400		-1.04	tol-	Zm00001d039374	1.48		sen+	1	6199245	6200202	Zinc finger RING/FYVE/PHD-type domain containing protein
Os01g0213800	BRADI_2g06890v3	1.63		sen+									Zm00001d039371	-1.5		sen-	1	6221640	6224242	Plant-specific transcription factor miR319 target gen
Os01g0214500	BRADI_2g06930v3	2.58		sen+									Zm00001d008923	1.71		sen+	1	6257846	6258501	Conserved hypothetical protein
Os01g0214800	BRADI_2g06950v3	2.12		sen+	HORVU3Hr1G028020		-5.12	tol-									1	6278520	6283559	Lipase GDSL domain containing protein
Os01g0215500													Zm00001d008925	0.85		sen+	1	6304802	6306605	Similar to esterase
Os01g0215700													Zm00001d008929	-1.42		sen-	1	6319130	6322451	Esterase SGNH hydrolase-type domain containing protein
Os01g0217000																	1	6387691	6391467	Protein of unknown function DUF231 plant domain containing protein
Os01g0217400													Zm00001d008933	-2.14		sen-	1	6402871	6405410	Conserved hypothetical protein
Os01g0217800	BRADI_2g07040v3	-0.96		sen-													1	6432336	6435651	ThiJ/PfpI domain containing protein
Os01g0218032									Os01g0218032	-0.56		sen-					1	6444246	6456068	Putative DNA demethylase Endosperm developmen
Os01g0218200					HORVU3Hr1G027650	-1.17		sen-									1	6471789	6476664	Thioredoxin domain 2 containing protein
Os01g0218700	BRADI_2g07076v3	-0.99		sen-									Zm00001d008940	-1.33		sen-	1	6500709	6507086	ABC transporter integral membrane type 1 domain containing protein
Os01g0218800													Zm00001d008941	-1		sen-	1	6507356	6514640	Similar to Trithorax 5 (Fragment)
Os01g0218900									Os01g0218900	0.59		sen+					1	6518152	6521026	Zinc finger PHD-type domain containing protein
Os01g0220300													Zm00001d039348	-1.21		sen-	1	6583687	6587107	Translation elongation factor EF1B/ribosomal protein S6 domain containing protein
Os01g0221100	BRADI_2g07227v3	-2.63		sen-													1	6626040	6630462	GH3 auxin-responsive promoter family protein
Os01g0221300									Os01g0221300	0.66		sen+					1	6642665	6645159	Conserved hypothetical protein
Os01g0221400									Os01g0221400	-1.01	-1.03						1	6649853	6650092	Conserved hypothetical protein
Os01g0221600									Os01g0221600	0.94	1.88						1	6659237	6662320	Aluminum-activated malate transporter Malate-permeable anion channel Facilitation of malate efflux from cell
Os01g0221700	BRADI_2g07266v3	-1.54	0.68	sen-/tol+					Os01g0221700		-0.55	tol-	Zm00001d008963	-2.76		sen-	1	6663533	6666725	Similar to GDT1-like protein 1 chloroplastic
Os01g0222500	BRADI_2g07290v3	-1.21		sen-									Zm00001d039330	1.06		sen+	1	6699636	6703371	Similar to Vacuolar ATP synthase subunit E (EC 3.6.3.14) (V-ATPase E subunit) (Vacuolar proton pump E subunit)
Os01g0222600	BRADI_2g07293v3	-1.27		sen-					Os01g0222600	-1.31	-1.15						1	6704187	6704746	Conserved hypothetical protein
Os01g0222700																	1	6705859	6710552	Protein of unknown function DUF659 domain containing protein
Os01g0222800					HORVU6Hr1G013750		-1.6	tol-									1	6713909	6714986	Similar to OSIGBa0145C12.7 protein
Os01g0223200					HORVU7Hr1G011810		3.38	tol+									1	6724946	6728538	Lipase GDSL domain containing protein
Os01g0223600	BRADI_2g07330v3	-0.83		sen-	HORVU3Hr1G030090		1.42	tol+					Zm00001d008965	1.68		sen+	1	6766511	6769519	Similar to Pto kinase interactor 1-like protein
Os01g0223700									Os01g0223700	-0.71		sen-					1	6774202	6776856	Bulb-type lectin domain domain containing protein
Os01g0223800	BRADI_2g07337v3	-1.64		sen-													1	6781919	6786415	Hypothetical conserved gene
Os01g0223900	BRADI_2g07347v3	-3.77		sen-									Zm00001d008966	2.81		sen+	1	6787094	6789730	Serine/threonine protein kinase-related domain containing protein
Os01g0224100																	1	6813719	6815534	Similar to DNA binding protein-like protein
Os01g0224200																	1	6830317	6832770	Hypothetical conserved gene
Os01g0224500	BRADI_2g07400v3	0.63		sen+													1	6841600	6843524	Conserved hypothetical protein
Os01g0225000	BRADI_2g07420v3	3.97		sen+									Zm00001d008974	1.25		sen+	1	6879860	6881980	Mitochondrial carrier protein domain containing protein
Os01g0225300	BRADI_2g07450v3	-0.48		sen-													1	6906353	6909594	Conserved hypothetical protein
Os01g0225400	BRADI_2g07470v3	1.51		sen+													1	6909800	6910700	Pyruvate/Phosphoenolpyruvate kinase catalytic core domain containing protein
Os01g0225600	BRADI_2g07480v3	7		sen+													1	6922127	6922762	Similar to Dehydrin
Os01g0226200	BRADI_2g07497v3	2.01		sen+													1	6957350	6958652	Conserved hypothetical protein
Os01g0226300																	1	6968951	6970078	Reticulon family protein
Os01g0226400	BRADI_2g07520v3	6.34		sen+	HORVU3Hr1G030770		1.49	tol+									1	6970912	6976706	ATPase AAA-type core domain containing protein
Os01g0226600																	1	6987901	6994006	Similar to C4-dicarboxylate transporter/malic acid transport protein
Os01g0227100													Zm00001d039312	1.65		sen+	1	7024297	7030591	Chlorophyll b reductase Leaf senescenc
Os01g0227200									Os01g0227200	0.93	0.62						1	7038103	7042925	Similar to Somatic embryogenesis receptor kinase-like protein
Os01g0227400	BRADI_2g07577v3	2.01		sen+					Os01g0227400	0.86	0.67		Zm00001d039310	1.15		sen+	1	7049941	7050874	Similar to Cytochrome P450 71A1 (EC 1.14.-.-) (CYPLXXIA1) (ARP-2)
Os01g0227800	BRADI_2g07597v3	-2.94		sen-	HORVU3Hr1G031020		-1.16	tol-	Os01g0227800	0.84		sen+	Zm00001d008985	2.39		sen+	1	7071481	7073788	Similar to cDNA clone: J075083L18 full insert sequence
Os01g0228300													Zm00001d008992	1.05		sen+	1	7085873	7089172	Mpv17/PMP22 family protein
Os01g0228400	BRADI_2g07630v3	-1.79		sen-					Os01g0228400	2.53		sen+	Zm00001d020775	-0.85		sen-	1	7092034	7095315	Pentatricopeptide repeat domain containing protein
Os01g0228600	BRADI_2g07650v3	-1.04		sen-									Zm00001d030544	2.66		sen+	1	7100070	7103266	Cytosolic hydroxypyruvate reductase NADPH-dependent HPR Photorespiratory metabolis
Os01g0228800	BRADI_2g07660v3	-1.11		sen-					Os01g0228800	-0.54		sen-	Zm00001d008993	-1		sen-	1	7104701	7109095	Conserved hypothetical protein
Os01g0229100	BRADI_2g07690v3	0.73		sen+													1	7125406	7128899	Similar to Eukaryotic translation initiation factor 3 subunit 6-interacting protein
Os01g0229200																	1	7129236	7137327	VHS domain containing protein
Os01g0229300	BRADI_2g07710v3	-1.14		sen-													1	7157780	7164385	EMBRYONIC FLOWER1 (EMF1)-like protein Transcriptional regulator Palea development Regulation of floral organ identit
Os01g0229500													Zm00001d008999	-1.58		sen-	1	7173618	7175779	Thioesterase superfamily domain containing protein
Os01g0229600									Os01g0229600	0.6		sen+					1	7176001	7177050	Conserved hypothetical protein
Os01g0229900	BRADI_2g07970v3	2.53		sen+									Zm00001d039280		0.92	tol+	1	7197022	7209085	Similar to Ubiquitin-conjugating enzyme family protein expressed
Os01g0231500	BRADI_2g07790v3	0.91		sen+													1	7265286	7273208	Similar to Casein kinase I (Fragment)
Os01g0232000	BRADI_2g07810v3	-2.49		sen-													1	7297781	7298619	Major intrinsic protein family protein
Os01g0232100	BRADI_2g07830v3	-2.63		sen-													1	7302563	7303771	Similar to Tonoplast membrane integral protein ZmTIP4-3
Os01g0232400																	1	7333827	7339244	Similar to VHS1 protein (Fragment)
Os01g0232500	BRADI_2g07870v3	0.77		sen+													1	7340717	7345302	Ubiquitin-conjugating enzyme/RWD-like domain containing protein
Os01g0232800	BRADI_2g07890v3	0.67		sen+													1	7352223	7357332	Similar to KOB1
Os01g0233000									Os01g0233000	-0.64		sen-					1	7363663	7366111	DREPP plasma membrane polypeptide family protein
Os01g0233900									Os01g0233900	1.1	1.6						1	7404911	7409638	Similar to cDNA clone:J013003E06 full insert sequence
Os01g0234100	BRADI_2g07986v3	-1.98		sen-													1	7417303	7422388	Transcriptional factor B3 family protein
Os01g0234200					HORVU2Hr1G056770		0.77	tol+									1	7424284	7427642	Similar to DNA topoisomerase 2
Os01g0234800																	1	7438862	7443214	Similar to 25.3 kDa vesicle transport protein
Os01g0234900									Os01g0234900	-0.79		sen-					1	7450936	7453683	Similar to Ubiquitin ligase SINAT5 (EC 6.3.2.-) (Seven in absentia homolog 5). Splice isoform 2
Os01g0235100	BRADI_2g08030v3	-1.48		sen-					Os01g0235100	1.16	0.87						1	7457835	7459834	Similar to predicted protein
Os01g0235350									Os01g0235350		0.74	tol+					1	7473271	7476621	Conserved hypothetical protein
Os01g0235400																	1	7477678	7482814	Similar to predicted protein
Os01g0235900	BRADI_2g08100v3	-0.84		sen-									Zm00001d039270	-0.99		sen-	1	7517314	7518489	Thioredoxin fold domain containing protein
Os01g0236300													Zm00001d039267	1.61		sen+	1	7547017	7551856	Similar to Auxin response factor 18
Os01g0236700	BRADI_2g08177v3	-0.67		sen-									Zm00001d009017	-1.68		sen-	1	7571236	7576792	Octicosapeptide/Phox/Bem1p domain containing protein
Os01g0237100									Os01g0237100		-0.53	tol-					1	7590433	7592743	Phosphoglycerate mutase domain containing protein
Os01g0237500					HORVU3Hr1G032370	3.64		sen+					Zm00001d009022	-3.56		sen-	1	7619082	7620013	NmrA-like family protein
Os01g0238500					HORVU3Hr1G032400		1.6	tol+	Os01g0238500	0.83		sen+	Zm00001d039264	-1.74		sen-	1	7665423	7668089	Similar to Branched-chain-amino-acid aminotransferase-like protein 3 chloroplast precursor
Os01g0238700																	1	7673033	7676401	Oligopeptide transporter OPT superfamily protein
Os01g0239000	BRADI_2g08287v3	-0.87		sen-					Os01g0239000	0.48		sen+	Zm00001d039260		0.68	tol+	1	7686901	7693984	Hypothetical conserved gene
Os01g0239100													Zm00001d009027	0.81		sen+	1	7712339	7721253	Heat shock protein DnaJ family protein
Os01g0239200	BRADI_2g08340v3	-2.72		sen-					Os01g0239200		-0.43	tol-	Zm00001d009028	-2.64		sen-	1	7718270	7722217	Similar to Phophate translocator (Fragment)
Os01g0239300									Os01g0239300		-1.49	tol-					1	7724314	7725532	Conserved hypothetical protein
Os01g0239700													Zm00001d009029	-1.91		sen-	1	7739074	7742878	Similar to Leucine-rich receptor-like protein kinase
Os01g0241000	BRADI_2g08370v3	2.46		sen+					Os01g0241000	2.25		sen+					1	7804166	7805788	Conserved hypothetical protein
Os01g0242300	BRADI_2g08470v3	-0.63		sen-													1	7852689	7855760	Optic atrophy 3 family protein
Os01g0242500													Zm00001d039620	-1.21		sen-	1	7857828	7860061	D-tyrosyl-tRNA(Tyr) deacylase family protein
Os01g0242600	BRADI_2g08500v3	1.5		sen+					Os01g0242600	0.63	0.7						1	7862065	7867775	C2 calcium-dependent membrane targeting domain containing protein
Os01g0242900																	1	7876239	7878776	Similar to 60S ribosomal protein L18A
Os01g0243000																	1	7880003	7882578	Similar to triacylglycerol lipase
Os01g0243200									Os01g0243200		0.65	tol+					1	7894961	7900550	Similar to integral membrane transporter family protein
Os01g0244400	BRADI_2g08420v3	1.2		sen+													1	7971864	7974941	Protein of unknown function DUF1618 domain containing protein
Os01g0246400									Os01g0246400	1.38	1.8						1	8061858	8062892	Similar to Low molecular mass early light-inducible protein HV90 chloroplast precursor (ELIP)
Os01g0246500	BRADI_2g08600v3	0.94		sen+													1	8064860	8069013	Similar to Minus dominance protein
Os01g0246700	BRADI_2g08620v3	1.56		sen+					Os01g0246700	-1.26	-0.89		Zm00001d039245	2		sen+	1	8084184	8086980	Similar to WRKY transcription factor 1
Os01g0247500									Os01g0247500	1.04	1.99						1	8125672	8128014	Protein kinase core domain containing protein
Os01g0247600									Os01g0247600		-0.66	tol-					1	8130258	8130932	Conserved hypothetical protein
Os01g0247900													Zm00001d039240	-2.45		sen-	1	8146442	8148059	AWPM-19-like family protein
Os01g0248300	BRADI_2g08701v3	-2.47		sen-	HORVU1Hr1G093890		-1	tol-									1	8159901	8161287	Similar to Pathogen-related protein
Os01g0248500									Os01g0248500	-1.1		sen-					1	8175587	8177889	Similar to Pathogen-related protein
Os01g0248600																	1	8179040	8183108	GINS complex Psf2 component family protein
Os01g0248701																	1	8191032	8192289	Terpenoid synthase domain containing protein
Os01g0249700					HORVU3Hr1G034110		-2.98	tol-									1	8229331	8229903	Heavy metal-associated domain HMA domain containing protein
Os01g0249900													Zm00001d040254	-1.58		sen-	1	8234625	8235833	Protein of unknown function DUF573 family protein
Os01g0250900	BRADI_2g08826v3	-1.82		sen-													1	8275474	8283959	HAD superfamily (subfamily IG) hydrolase 5'-Nucleotidase protein
Os01g0251100	BRADI_2g08840v3	1.4		sen+									Zm00001d008360	-1.14		sen-	1	8291337	8296089	Similar to 50S ribosomal protein L3-2 chloroplast precursor
Os01g0252100	BRADI_2g08890v3	-0.87		sen-	HORVU3Hr1G034440		-0.47	tol-					Zm00001d040263		0.96	tol+	1	8329791	8333933	Similar to Glycogen synthase kinase-3 homolog MsK-3 (EC 2.7.1.-)
Os01g0252600					HORVU3Hr1G034640		-0.86	tol-					Zm00001d040264	-2.69		sen-	1	8344471	8346041	Similar to predicted protein
Os01g0253200	BRADI_2g08950v3	-6.6		sen-													1	8380048	8380745	Similar to pectinesterase inhibitor domain containing protein
Os01g0253400													Zm00001d040275	-4.16		sen-	1	8387589	8388859	Protein of unknown function DUF1218 family protein
Os01g0253900													Zm00001d008340	1.9		sen+	1	8404247	8408353	Similar to triacylglycerol lipase
Os01g0254100	BRADI_2g09080v3	-0.74		sen-													1	8420995	8430280	Similar to CTV.2
Os01g0254200	BRADI_2g09085v3	-0.67		sen-	HORVU3Hr1G035180		-0.94	tol-	Os01g0254200	-0.58		sen-					1	8444463	8447053	Conserved hypothetical protein
Os01g0255000													Zm00001d040290	-0.93		sen-	1	8486578	8489618	Similar to Soluble epoxide hydrolase
Os01g0256400													Zm00001d040291	1.09		sen+	1	8540755	8544460	Similar to Dynein light chain 1 protein DLC-1 (Fragment)
Os01g0256500	BRADI_2g09145v3	2.23		sen+					Os01g0256500	1.07	0.68		Zm00001d008329		-3.32	tol-	1	8546065	8546869	Similar to ZnI
Os01g0257300	BRADI_2g09310v3	2.04		sen+									Zm00001d040298	3.19		sen+	1	8586157	8586941	Similar to FPF1
Os01g0257400																	1	8593792	8599448	Zinc finger CCCH-type domain containing protein
Os01g0259300									Os01g0259300	-0.7		sen-					1	8689258	8689797	Non-protein coding transcript
Os01g0259400	BRADI_2g09370v3	-0.9		sen-													1	8691829	8699628	Armadillo-type fold domain containing protein
Os01g0259900																	1	8718704	8720961	Conserved hypothetical protein
Os01g0259933									Os01g0259933	1.08		sen+					1	8722666	8723283	Non-protein coding transcript
Os01g0260000																	1	8733343	8734486	Protein prenyltransferase domain containing protein
Os01g0260100													Zm00001d040312	-2.27		sen-	1	8734767	8741720	Similar to Kinesin heavy chain (Fragment)
Os01g0260500					HORVU6Hr1G020670		-0.81	tol-									1	8747124	8753486	Hypothetical conserved gene
Os01g0261100																	1	8786623	8792221	Zinc finger RING-type domain containing protein
Os01g0261200					HORVU3Hr1G036380		-0.58	tol-	Os01g0261200	-0.61		sen-					1	8792649	8797358	No apical meristem (NAM) protein domain containing protein
Os01g0262500									Os01g0262500		-0.6	tol-					1	8883493	8885388	TRAM/LAG1/CLN8 homology domain domain containing protein
Os01g0263400																	1	8921590	8924862	Pentatricopeptide repeat domain containing protein
Os01g0264000	BRADI_2g09720v3	-1.29		sen-													1	8949337	8951088	Dof transcription factor Promotion of nutrient ion uptake and accumulatio
Os01g0264500													Zm00001d008297	-1.09		sen-	1	8988911	8992577	Similar to T11I18.15 protein
Os01g0264600	BRADI_2g09750v3	-1.63		sen-									Zm00001d008296		-1.42	tol-	1	8995314	8996892	Conserved hypothetical protein
Os01g0264700																	1	9004534	9008221	Cellular retinaldehyde binding/alpha-tocopherol transport family protein
Os01g0265000	BRADI_2g09777v3	1.74		sen+													1	9018144	9019762	Geranylgeranyl reductase alpha-tocopherol synthesi
Os01g0265100																	1	9019849	9024048	Similar to ADP-ribosylation factor
Os01g0265200					HORVU3Hr1G037170	1.13	1.48										1	9024970	9028874	Mitochondrial carrier protein Early leaf developmen
Os01g0266000	BRADI_2g09860v3	0.78		sen+									Zm00001d008289	-0.94		sen-	1	9074613	9083794	RNA-binding protein Lupus La domain containing protein
Os01g0266400	BRADI_2g09876v3	-0.96		sen-													1	9113868	9114423	Conserved hypothetical protein
Os01g0266800	BRADI_2g09940v3	0.88		sen+					Os01g0266800	1.54	1.6		Zm00001d008285	1.84		sen+	1	9133740	9140430	Cystinosin/ERS1p repeat containing protein
Os01g0267300	BRADI_4g23070v3	-1.45		sen-													1	9171328	9172907	Hypothetical conserved gene
Os01g0268100																	1	9204377	9211643	Similar to Major facilitator superfamily antiporter
Os01g0268300													Zm00001d040416	-3.57		sen-	1	9225213	9237025	Similar to DNA gyrase B subunit
Os01g0268800																	1	9259148	9264227	Ubiquitin-associated/translation elongation factor EF1B N-terminal eukaryote domain containing protein
Os01g0268900													Zm00001d040409	-1.31		sen-	1	9264978	9268375	Conserved hypothetical protein
Os01g0269000													Zm00001d008271	1.33		sen+	1	9268690	9272912	Similar to Hydroxymethylglutaryl-CoA lyase
Os01g0269500									Os01g0269500		0.81	tol+					1	9293193	9299711	Conserved hypothetical protein
Os01g0270100	BRADI_2g10146v3	1.04		sen+													1	9325669	9329331	Similar to Cysteine protease inhibitor
Os01g0270300													Zm00001d008266	-2.23		sen-	1	9339815	9342240	Similar to Cationic peroxidase isozyme 40K precursor
Os01g0271000													Zm00001d008264	-0.95		sen-	1	9370627	9373600	Conserved hypothetical protein
Os01g0271200	BRADI_3g13397v3	1.04		sen+	HORVU1Hr1G078370	0.82		sen+									1	9373756	9378200	Similar to Glutamyl-tRNA synthetase
Os01g0271700									Os01g0271700	0.61		sen+					1	9394143	9396611	Conserved hypothetical protein
Os01g0272600					HORVU3Hr1G038500		0.91	tol+					Zm00001d008258	1.97		sen+	1	9424556	9429189	Similar to Root determined nodulation 1
Os01g0272800																	1	9431735	9434046	Conserved hypothetical protein
Os01g0272850									Os01g0272850	-0.94	-1.99	ΔLFC<-1					1	9431788	9435864	Hypothetical protein
Os01g0273800									Os01g0273800	-1.94		sen-					1	9488825	9493964	FAD-dependent pyridine nucleotide-disulphide oxidoreductase domain containing protein
Os01g0275600													Zm00001d040429		0.52	tol+	1	9631334	9638881	Similar to Argonaute 4 protein
Os01g0275900	BRADI_2g10377v3	-1.02		sen-													1	9644443	9647828	Hypothetical conserved gene
Os01g0276100	BRADI_3g43300v3	-0.54		sen-					Os01g0276100	-0.45		sen-	Zm00001d008244	0.9		sen+	1	9665409	9670111	Similar to 3-isopropylmalate dehydrogenase chloroplast precursor (EC 1.1.1.85) (Beta-IPM dehydrogenase) (IMDH) (3-IPM-DH)
Os01g0276200	BRADI_2g10420v3	2.54		sen+													1	9671077	9676036	Similar to Mitochondrial import receptor subunit TOM40
Os01g0276300	BRADI_2g10450v3	3.89		sen+													1	9679828	9680883	Similar to Group 3 late embryogenesis abundant protein (Fragment)
Os01g0276500													Zm00001d008238	-1.1		sen-	1	9684848	9689506	Similar to Histidine biosynthesis bifunctional protein hisIE chloroplast precursor [Includes: Phosphoribosyl-AMP cyclohydrolase (EC 3.5.4.19) (PRA-CH)%3B Phosphoribosyl-ATP pyrophosphatase (EC 3.6.1.31) (PRA-PH)]
Os01g0276700	BRADI_2g10530v3	0.97		sen+													1	9694027	9699817	Similar to Pyruvate kinase cytosolic isozyme (EC 2.7.1.40) (PK)
Os01g0276800	BRADI_2g10540v3	0.8		sen+													1	9702737	9709686	Glucosidase II beta subunit Potential switch between programmed cell death and autophag
Os01g0277500									Os01g0277500		-1	tol-					1	9733832	9738224	Dof (DNA binding with one finger) transcription factor C2-C2 zinc finger transcription factor Regulation of flowering tim
Os01g0277600									Os01g0277600		0.46	tol+					1	9738449	9744876	Similar to aminophospholipid ATPase
Os01g0278000									Os01g0278000		-1.33	tol-					1	9770018	9771047	VQ domain containing protein
Os01g0278050									Os01g0278050	0.59		sen+					1	9787093	9787848	Hypothetical conserved gene
Os01g0278900	BRADI_2g10740v3	-2.59	0.74	sen-/tol+					Os01g0278900		-0.62	tol-	Zm00001d008228	-2.93		sen-	1	9859354	9860677	Similar to 50S ribosomal protein L40
Os01g0278950													Zm00001d040466	-1.94		sen-	1	9863216	9866617	Similar to predicted protein
Os01g0279000									Os01g0279000	1.31		sen+					1	9866730	9870864	Zinc finger DHHC-type domain containing protein
Os01g0279100	BRADI_2g10770v3	-2.22		sen-					Os01g0279100	0.63		sen+	Zm00001d008230	-2.03		sen-	1	9874379	9876678	Subunit of magnesium-protoporphyrin IX monomethyl ester cyclase (EC:1.14.13.81) Core component of FLU-YGL8-LCAA-POR complex Chlorophyll biosynthesis Chloroplast developmen
Os01g0279200	BRADI_2g10780v3	0.61		sen+													1	9878384	9885517	Similar to COP9 signalosome complex subunit 2
Os01g0279300									Os01g0279300	-0.47		sen-					1	9887657	9889123	Similar to Calmodulin 1 (Fragment)
Os01g0279400	BRADI_2g10800v3	-1.59		sen-					Os01g0279400	-1.22	-1.09		Zm00001d040468	0.85		sen+	1	9889550	9902737	Major facilitator superfamily antiporter
Os01g0279700	BRADI_4g41100v3	0.73		sen+													1	9913390	9917318	Major facilitator superfamily protein
Os01g0280500	BRADI_2g10857v3	1.92		sen+													1	9967185	9969073	Similar to Eukaryotic translation initiation factor 6 (eIF-6) (B4 integrin interactor) (CAB) (p27(BBP)) (B(2)GCN homolog)
Os01g0281000	BRADI_2g10870v3	-0.81		sen-					Os01g0281000	0.82	0.84		Zm00001d040477	-1	0.79	sen-/tol+	1	10003952	10007742	Cyclin-like F-box domain containing protein
Os01g0281100									Os01g0281100	1.49	1.48		Zm00001d008222		1.19	tol+	1	10008075	10011595	Conserved hypothetical protein
Os01g0281301																	1	10019633	10020376	Protein of unknown function DUF1645 domain containing protein
Os01g0281400	BRADI_2g10910v3	0.7		sen+													1	10021423	10027120	Coatomer beta subunit domain containing protein
Os01g0283000	BRADI_2g10980v3	1.02		sen+													1	10113431	10119022	Conserved hypothetical protein
Os01g0283300									Os01g0283300		-0.63	tol-					1	10134096	10135327	Conserved hypothetical protein
Os01g0283500									Os01g0283500	0.86		sen+					1	10137726	10140166	Similar to predicted protein
Os01g0284500													Zm00001d040519	1.75		sen+	1	10167946	10168997	Similar to Nectarin 1 precursor (EC 1.15.1.1) (Superoxide dismutase [Mn])
Os01g0284700									Os01g0284700	0.92		sen+	Zm00001d008209	-2.04	-1.4		1	10193658	10196611	Similar to Peptidyl-prolyl cis-trans isomerase
Os01g0284900	BRADI_2g11070v3	2.15		sen+					Os01g0284900	2	1.33		Zm00001d008208		1.49	tol+	1	10200477	10203472	Conserved hypothetical protein
Os01g0285300	BRADI_2g11080v3	1.42		sen+									Zm00001d040527	-2.32		sen-	1	10217782	10219691	Myb transcription factor domain containing protein
Os01g0286000																	1	10264587	10267953	Snf7 family protein
Os01g0286100													Zm00001d008205	-1.32		sen-	1	10271157	10274304	Phytochrome-interacting factor-like protein Basic helix-loop-helix factor Repression of seedling growth in the dar
Os01g0286600													Zm00001d008203	-2.36		sen-	1	10291889	10295449	Similar to Plastidal protoporphyrinogen oxidase
Os01g0286900																	1	10312342	10314826	Similar to Auxin-responsive protein IAA31 (Indoleacetic acid-induced protein 31)
Os01g0289600									Os01g0289600	-1.06		sen-	Zm00001d040554		0.7	tol+	1	10471169	10478800	Similar to WRKY transcription factor 28
Os01g0290000									Os01g0290000	-0.44	-0.4						1	10492039	10495682	Similar to Cyprosin precursor (EC 3.4.23.-) (Fragment)
Os01g0290100									Os01g0290100	0.51		sen+					1	10496869	10500943	Pyridoxal phosphate-dependent transferase major region subdomain 1 domain containing protein
Os01g0290700					HORVU3Hr1G065320	2.7		sen+					Zm00001d011644	-2.72		sen-	1	10515442	10516270	Similar to CjMDR1
Os01g0292200	BRADI_2g11220v3	-0.82		sen-					Os01g0292200	0.85	0.58						1	10622951	10627532	Serine/threonine protein kinase domain containing protein
Os01g0292900									Os01g0292900	-0.63		sen-	Zm00001d040571	-1.59		sen-	1	10650597	10656755	Similar to Squamosa-promoter binding-like protein 2
Os01g0293000									Os01g0293000		0.76	tol+					1	10657543	10660137	S-adenosyl-l-methionine synthetase Histone H3K4me3 and DNA methylation Regulation of gene expression related to flowerin
Os01g0295700	BRADI_2g11350v3	1.14		sen+													1	10805527	10808077	Similar to Protein phosphatase-2C
Os01g0295900	BRADI_2g11360v3	-0.67		sen-									Zm00001d040582	-1.96		sen-	1	10814139	10818530	Similar to cDNA clone:J023064I01 full insert sequence
Os01g0296200													Zm00001d009057		-2.21	tol-	1	10830393	10831757	Similar to polygalacturonase
Os01g0299300	BRADI_2g11450v3	-1.98		sen-													1	10969328	10973346	Hypothetical conserved gene
Os01g0300200	BRADI_2g11480v3	1.15		sen+													1	10999316	11005978	Similar to ATP-citrate lyase subunit B
Os01g0301500	BRADI_2g11510v3	1.63		sen+	HORVU2Hr1G120330	0.86		sen+									1	11078206	11083482	Pentatricopeptide repeat domain containing protein
Os01g0303000									Os01g0303000	-0.4	-0.61						1	11202609	11203331	Similar to CP12 (Fragment)
Os01g0303300	BRADI_2g11567v3	12.95	-3.21	sen+/tol-													1	11221847	11223469	Similar to Stress-inducible membrane pore protein
Os01g0303600					HORVU1Hr1G052850		-1.43	tol-					Zm00001d040614	-0.82		sen-	1	11231975	11234809	Zinc finger RING/FYVE/PHD-type domain containing protein
Os01g0303800													Zm00001d009118	2.8		sen+	1	11245253	11246737	UspA domain containing protein
Os01g0304000	BRADI_2g28170v3	0.78		sen+									Zm00001d009117	-1.12		sen-	1	11249654	11251227	Similar to Ribosomal protein L29
Os01g0305200									Os01g0305200	-1.96	-0.84	ΔLFC>1					1	11316720	11320061	Lg106-like family protein
Os01g0305900	BRADI_2g11676v3	-0.55		sen-					Os01g0305900	0.88		sen+	Zm00001d040621	1.38	-1.03	sen+/tol-	1	11350507	11356863	Similar to R2R3 Myb transcription factor MYB-IF35
Os01g0306800									Os01g0306800		-0.6	tol-					1	11412154	11421047	Conserved hypothetical protein
Os01g0307500													Zm00001d040627		1.26	tol+	1	11458956	11463442	Na<sup>+</sup> transporter A member of HKT (high-affinity K<sup>+</sup> transporter)-type transporters Regulation of K<sup>+</sup>/Na<sup>+</sup> homeostasis Salt toleranc
Os01g0308300													Zm00001d032510	-1.6		sen-	1	11526651	11529893	NB-ARC domain containing protein
Os01g0309800									Os01g0309800	-0.94	-0.76		Zm00001d040637		1.33	tol+	1	11611069	11612597	Similar to Hydrogenase expression/formation protein hypB
Os01g0309900																	1	11618335	11622522	Lipase class 3 family protein
Os01g0310100									Os01g0310100		0.79	tol+					1	11625271	11637356	Similar to PLDP1 (PHOSPHOLIPASE D P1)%3B phospholipase D
Os01g0311100									Os01g0311100	-1.68	-1.6						1	11686442	11687191	Similar to RING-H2 finger protein ATL2L
Os01g0311500	BRADI_2g11830v3	0.74		sen+													1	11693812	11699838	Similar to PHS1 (PROPYZAMIDE-HYPERSENSITIVE 1)%3B phosphoprotein phosphatase/ protein tyrosine/serine/threonine phosphatase
Os01g0311800													Zm00001d040649	3.8		sen+	1	11715268	11717784	Similar to Pectin methylesterase 8 (Fragment)
Os01g0312500													Zm00001d040650	-2.85		sen-	1	11741908	11750685	Similar to Pectinesterase
Os01g0314000	BRADI_2g56435v3	1.77		sen+													1	11800240	11803815	Protein of unknown function DUF3615 domain containing protein
Os01g0314100	BRADI_2g11900v3	2.78		sen+									Zm00001d040670	1.41		sen+	1	11804161	11809029	Catalytic domain of components of various dehydrogenase complexes containing protein
Os01g0314600	BRADI_2g11920v3	-2.46		sen-	HORVU0Hr1G010080		1.96	tol+					Zm00001d009071	-2.71		sen-	1	11848194	11852000	Similar to Cytochrome c oxidoreductase
Os01g0314800	BRADI_2g11940v3	-1.51		sen-					Os01g0314800	1.07		sen+	Zm00001d040659	-1.95		sen-	1	11863682	11864412	Late embryogenesis abundant protein 3 family protein
Os01g0315600													Zm00001d040666	2.06		sen+	1	11897584	11902407	Similar to Monoglyceride lipase
Os01g0315800													Zm00001d040667	0.79		sen+	1	11906864	11910915	UDP-glucuronic acid decarboxylase (EC 4.1.1.35)
Os01g0316100																	1	11944340	11945793	FAD dependent oxidoreductase family protein
Os01g0316500									Os01g0316500	0.57		sen+					1	11953342	11955432	Conserved hypothetical protein
Os01g0316600									Os01g0316600	0.78	0.66						1	11958911	11964676	Similar to pre-mRNA-splicing factor SF2
Os01g0317800	BRADI_2g12020v3	-2.15		sen-									Zm00001d040681	-2.17		sen-	1	12067684	12068949	Alpha/beta hydrolase family protein
Os01g0319000	BRADI_2g12047v3	-2.43		sen-									Zm00001d009152	-0.98		sen-	1	12117107	12123026	Similar to Pectin acetylesterase (Fragment)
Os01g0321300	BRADI_2g12067v3	-0.89		sen-									Zm00001d040686	-1.41		sen-	1	12235589	12248125	Similar to Protein translocase subunit secA
Os01g0321700													Zm00001d009150	0.71		sen+	1	12258138	12263046	Similar to predicted protein
Os01g0322700									Os01g0322700	-0.59	-2.44	ΔLFC<-1					1	12301586	12302556	Non-protein coding transcript
Os01g0323300	BRADI_2g12140v3	-0.73		sen-									Zm00001d040696	-1.56		sen-	1	12344403	12350966	RNA-binding CRM domain domain containing protein
Os01g0324400									Os01g0324400		-1.11	tol-					1	12403525	12408003	Hypothetical conserved gene
Os01g0326100					HORVU7Hr1G083550	2.92		sen+									1	12509590	12511125	Similar to Peroxidase component PR-2 and/or 4 (Fragment)
Os01g0326300													Zm00001d040702	-1.76		sen-	1	12517993	12519238	Haem peroxidase plant/fungal/bacterial family protein
Os01g0327000																	1	12551333	12557268	Similar to Class III peroxidase 14
Os01g0327100	BRADI_2g12204v3	3.7	1.37	ΔLFC<-1													1	12564283	12570030	Haem peroxidase family protein
Os01g0327400									Os01g0327400	-1.82		sen-					1	12578189	12582256	Similar to Peroxidase (Fragment)
Os01g0328500													Zm00001d009161	-1.21		sen-	1	12646586	12650012	Bucentaur or craniofacial development family protein
Os01g0328700	BRADI_2g12310v3	-2.42		sen-					Os01g0328700		-0.47	tol-					1	12655016	12658349	FAD-dependent pyridine nucleotide-disulphide oxidoreductase domain containing protein
Os01g0329000													Zm00001d034732		-1.19	tol-	1	12677044	12683455	Phospholipid/glycerol acyltransferase domain containing protein
Os01g0329400	BRADI_2g12390v3	0.89		sen+					Os01g0329400		0.55	tol+					1	12704756	12709781	Mitochondrial substrate carrier family protein
Os01g0329800	BRADI_2g12380v3	1.11		sen+													1	12725141	12731526	YT521-B-like protein family protein
Os01g0331100	BRADI_2g12330v3	-6.11		sen-									Zm00001d040733	-1.73		sen-	1	12804579	12810204	Similar to Alpha-L-fucosidase 2
Os01g0332100	BRADI_2g12427v3	-1.04		sen-					Os01g0332100	-0.95	-0.94		Zm00001d009177	-1.94		sen-	1	12870240	12874218	Similar to Neutral invertase-like protein (Fragment)
Os01g0332500													Zm00001d040741	-2.9		sen-	1	12896359	12915380	Similar to Serine carboxypeptidase II-like protein
Os01g0332800									Os01g0332800		-0.49	tol-					1	12915334	12919209	Similar to Serine carboxypeptidase II-like protein
Os01g0333001									Os01g0333001		-0.96	tol-					1	12924255	12925541	Non-protein coding transcript
Os01g0335700					HORVU7Hr1G110630		-0.83	tol-									1	13142060	13144941	NB-ARC domain containing protein
Os01g0337100													Zm00001d024207		-3.83	tol-	1	13211987	13218563	Similar to Sesquiterpene synthase
Os01g0337500													Zm00001d009222	2.54		sen+	1	13237248	13246058	Similar to H+-pyrophosphatase (Fragment)
Os01g0339900	BRADI_2g12560v3	0.91		sen+					Os01g0339900	-0.63		sen-	Zm00001d040766	0.71		sen+	1	13353629	13357499	Thioredoxin domain 2 containing protein
Os01g0341750									Os01g0341750	-1.1		sen-					1	13487892	13506871	Hypothetical protein
Os01g0342750					HORVU3Hr1G071470		-2.86	tol-									1	13524554	13528480	Hypothetical conserved gene
Os01g0342800									Os01g0342800	1.19		sen+					1	13531040	13531777	Similar to UPF0631 protein
Os01g0343300	BRADI_2g12590v3	-1.18		sen-									Zm00001d009193	-0.97		sen-	1	13570702	13573119	Zinc finger NHR/GATA-type domain containing protein
Os01g0346250									Os01g0346250		-1.1	tol-					1	13770746	13772078	Conserved hypothetical protein
Os01g0346700	BRADI_2g12610v3	-0.93		sen-													1	13778764	13779786	Conserved hypothetical protein
Os01g0347100	BRADI_2g12637v3	2.69		sen+					Os01g0347100	1.07	0.93		Zm00001d040784		0.6	tol+	1	13799955	13804764	Protein of unknown function DUF1399 family protein
Os01g0347200																	1	13807525	13809820	Conserved hypothetical protein
Os01g0348600													Zm00001d009182	1.02		sen+	1	13887272	13893184	Similar to MFP2 (Fatty acid multifunctional protein) (AtMFP2)
Os01g0348900	BRADI_3g19730v3	-1.34		sen-													1	13903285	13904626	Jacalin-related mannose-binding lectin Salinity toleranc
Os01g0349400	BRADI_2g12650v3	-1.32		sen-													1	13922501	13927453	Similar to Serine/threonine protein phosphatase PP1 (EC 3.1.3.16) (Fragment)
Os01g0349800																	1	13941318	13944605	Similar to Cytochrome P450
Os01g0350000									Os01g0350000	-0.66		sen-					1	13957514	13959224	Transferase family protein
Os01g0351300	BRADI_2g12680v3	0.69		sen+													1	14059603	14064199	Exocyst complex subunit Sec15-like family protein
Os01g0352100									Os01g0352100	0.99	0.92						1	14101994	14108083	2OG-Fe(II) oxygenase domain containing protein
Os01g0354450	BRADI_1g77710v3	1.68		sen+													1	14229224	14230079	Similar to ATP binding protein
Os01g0356400																	1	14340326	14357449	Similar to multidrug resistance protein ABC transporter family
Os01g0356500					HORVU2Hr1G017960	-0.8		sen-	Os01g0356500	0.7		sen+					1	14391999	14398598	Thiamin pyrophosphokinase eukaryotic domain containing protein
Os01g0357100	BRADI_3g57990v3	-1.5		sen-									Zm00001d018161		-2.77	tol-	1	14446913	14453454	Ferredoxin-nitrite reductase Nitrate reduction (assimilation) Determination of regeneration abilit
Os01g0358300	BRADI_2g12780v3	-1.44		sen-									Zm00001d040804	-0.76		sen-	1	14506676	14513133	Tetratricopeptide-like helical domain containing protein
Os01g0358700	BRADI_4g22740v3	-1.06		sen-													1	14529887	14531604	Similar to Powdery mildew resistance protein PM3b
Os01g0360200					HORVU4Hr1G086500		1.34	tol+					Zm00001d009248	-7.6		sen-	1	14621368	14627934	Similar to Respiratory burst oxidase homolog
Os01g0361500									Os01g0361500	0.42	0.59						1	14732018	14738430	Phospholipid/glycerol acyltransferase domain containing protein
Os01g0362100	BRADI_2g12850v3	0.88		sen+					Os01g0362100	0.71	1.01		Zm00001d040818	-1.66		sen-	1	14754835	14764507	Esterase/lipase/thioesterase domain containing protein
Os01g0363300																	1	14793093	14797054	Uncharacterised protein family UPF0497 trans-membrane plant subgroup domain containing protein
Os01g0363900																	1	14809676	14821941	Similar to HASTY
Os01g0364100					HORVU6Hr1G011650		1.26	tol+									1	14825133	14828267	Similar to OSIGBa0145M07.8 protein
Os01g0364400									Os01g0364400	-0.58		sen-					1	14856256	14878542	Protein kinase catalytic domain domain containing protein
Os01g0364800									Os01g0364800	-1.37	-0.73						1	14892931	14898978	Protein kinase catalytic domain domain containing protein
Os01g0367100	BRADI_2g12920v3	-0.81		sen-													1	14993204	14998103	Chloroplast-localized UDP-glucose epimerase (UGE) Galactolipid biosynthesis for chloroplast membranes Photosynthetic capability and carbon assimilate homeostasi
Os01g0367400	BRADI_2g12930v3	-0.74		sen-													1	15019814	15023931	Conserved hypothetical protein
Os01g0367700									Os01g0367700	0.56		sen+					1	15059450	15067522	Similar to Cyclin-dependent protein kinase-like protein
Os01g0367900									Os01g0367900	-1.1		sen-					1	15075863	15083305	Similar to Possible global transcription activator SNF2L1 (SWI/SNF related matrix associated actin dependent regulator of chromatin subfamily A member 1)
Os01g0368700																	1	15118693	15119756	Protein of unknown function DUF679 domain containing protein
Os01g0368900	BRADI_2g12960v3	-3.28		sen-									Zm00001d040836	-5.09		sen-	1	15124631	15125396	Similar to Glutaredoxin-C1
Os01g0369200									Os01g0369200	0.85		sen+					1	15146089	15152275	Component of cullin-RING E3 ubiquitin ligase (CRL) complex Salt/drought stress response Cold stress respons
Os01g0369300																	1	15152302	15157185	Potassium uptake protein kup domain containing protein
Os01g0369700	BRADI_2g13010v3	-1.73		sen-					Os01g0369700	-0.98		sen-	Zm00001d043344	4.44		sen+	1	15170441	15171859	Similar to Glutathione S-transferase GST 8 (EC 2.5.1.18)
Os01g0369900									Os01g0369900	-1.09		sen-					1	15185168	15188301	Similar to 12-oxo-phytodienoic acid reductase6
Os01g0370600					HORVU1Hr1G017050		-0.71	tol-									1	15234445	15234693	Similar to Glutathione transferase
Os01g0371200									Os01g0371200	1.28	1.89						1	15281170	15283073	Similar to Glutathione-S-transferase 19E50
Os01g0371400					HORVU7Hr1G116650	2.58	-2.32	sen+/tol-									1	15289214	15291315	Similar to Glutathione s-transferase gstf2
Os01g0372400					HORVU5Hr1G104670		-1.36	tol-									1	15344380	15345409	Glutathione S-transferase C-terminal-like domain containing protein
Os01g0372700													Zm00001d009271	-1.11		sen-	1	15356785	15360682	Similar to Asparaginyl-tRNA synthetase cytoplasmic 1 (EC 6.1.1.22) (Asparagine-- tRNA ligase 1) (AsnRS 1)
Os01g0375000	BRADI_1g31710v3	1.05		sen+													1	15462065	15465895	GTP1/OBG domain containing protein
Os01g0375100	BRADI_1g76707v3	-0.97		sen-													1	15474284	15478322	Similar to DnAJ-like protein slr0093
Os01g0375200													Zm00001d040850	1.71		sen+	1	15479968	15493392	Similar to shikimate biosynthesis protein aroDE
Os01g0376700									Os01g0376700	0.49		sen+					1	15568888	15573347	Similar to Sucrose-phosphatase (EC 3.1.3.24)
Os01g0377700	BRADI_2g13180v3	-0.62		sen-													1	15644974	15649392	Similar to NPL4 family protein
Os01g0378100	BRADI_2g13190v3	5		sen+													1	15672663	15675607	Plant peroxidase domain containing protein
Os01g0382000									Os01g0382000	-2.94	-1.28	ΔLFC>1	Zm00001d009296		-4.27	tol-	1	15934495	15935317	Similar to Pathogenesis-related protein PRB1-2 precursor
Os01g0382700																	1	15975326	15980519	Similar to stress regulated protein
Os01g0382900									Os01g0382900		-1.39	tol-					1	15992759	15996844	Conserved hypothetical protein
Os01g0383700									Os01g0383700	-0.93		sen-					1	16046692	16056268	Similar to LEC14B protein
Os01g0384300	BRADI_2g13236v3	-1.04		sen-													1	16086670	16088900	Similar to RKF3 (RECEPTOR-LIKE KINASE IN IN FLOWERS 3)%3B kinase
Os01g0384800					HORVU5Hr1G072770		-4.08	tol-	Os01g0384800		-0.77	tol-					1	16130515	16131331	Conserved hypothetical protein
Os01g0385400	BRADI_2g31957v3	2.35		sen+									Zm00001d037816	2.18		sen+	1	16151562	16154044	C4-dicarboxylate transporter/malic acid transport protein family protein
Os01g0386600	BRADI_1g03500v3	-2.17		sen-													1	16227573	16227890	TGF-beta receptor type I/II extracellular region family protein
Os01g0388000																	1	16325492	16327497	Similar to Cytochrome P450 monooxygenase CYP72A5 (Fragment)
Os01g0389700	BRADI_1g57240v3	-2.49		sen-	HORVU7Hr1G110570		-3.99	tol-	Os01g0389700	-3.27	-2.87						1	16435858	16436778	Protein of unknown function DUF679 family protein
Os01g0390600									Os01g0390600	-0.81		sen-					1	16495359	16503329	Pentatricopeptide repeat domain containing protein
Os01g0390900	BRADI_2g13400v3	-0.54		sen-					Os01g0390900		0.5	tol+					1	16511620	16518660	Similar to Dual-specificity protein phosphatase-like protein
Os01g0392100																	1	16659734	16664415	Conserved hypothetical protein
Os01g0495900													Zm00001d019573	-0.7		sen-	1	17012671	17016236	Similar to CRS2-associated factor 1
Os01g0498200									Os01g0498200		0.47	tol+					1	17155310	17157677	Conserved hypothetical protein
Os01g0498300	BRADI_2g13600v3	2.31		sen+									Zm00001d009328	1.41		sen+	1	17159733	17161535	Glycosyltransferase AER61 uncharacterized domain containing protein
Os01g0500900	BRADI_3g28520v3	-1.55		sen-									Zm00001d003430	-0.91		sen-	1	17301967	17303705	Rossmann-like alpha/beta/alpha sandwich fold domain containing protein
Os01g0501700													Zm00001d028272	-1.09		sen-	1	17341236	17346405	Similar to TATC (CpTatC)
Os01g0501800	BRADI_1g56580v3	-2.21		sen-					Os01g0501800		-0.68	tol-	Zm00001d014564	-1.63		sen-	1	17349338	17350785	Similar to Photosystem II oxygen-evolving complex protein 1 (Fragment)
Os01g0503400									Os01g0503400		-0.75	tol-					1	17454023	17464973	Similar to (Rice Genome Annotation Project) metal transporter Nramp6
Os01g0504100	BRADI_2g13650v3	-1.83		sen-					Os01g0504100	0.8		sen+					1	17490478	17491818	Protein of unknown function DUF250 domain containing protein
Os01g0504500	BRADI_2g12080v3	1.81		sen+					Os01g0504500		1.03	tol+					1	17504553	17512361	Similar to Transparent testa 12 protein
Os01g0505500													Zm00001d044944	-2.04		sen-	1	17565806	17567476	Pentatricopeptide repeat domain containing protein
Os01g0507300									Os01g0507300		-0.59	tol-					1	17697147	17706364	Protein of unknown function DUF92 transmembrane family protein
Os01g0507700									Os01g0507700	0.74		sen+	Zm00001d034978	0.74	0.64		1	17741064	17742255	Heavy metal transport/detoxification protein domain containing protein
Os01g0507900													Zm00001d009339	-1.32		sen-	1	17746363	17752009	Similar to NClpP3 (ATP-dependent Clp protease proteolytic subunit ClpP3)
Os01g0508000									Os01g0508000	1.31	1.48						1	17756115	17764819	Similar to Beta-glucosidase
Os01g0508500									Os01g0508500	0.89	1.53						1	17798266	17799004	Conserved hypothetical protein
Os01g0510100									Os01g0510100	-0.48		sen-					1	17904834	17910037	MAP kinase kinase 1
Os01g0510200																	1	17911538	17912144	Conserved hypothetical protein
Os01g0510600	BRADI_4g27210v3	-2.77	0.69	sen-/tol+									Zm00001d019956	-2.34		sen-	1	17947850	17951625	Tetratricopeptide-like helical domain containing protein
Os01g0511000																	1	17975866	17977327	Similar to LOB domain protein 40
Os01g0511100	BRADI_5g24660v3	1.61		sen+	HORVU2Hr1G111600	1.26		sen+					Zm00001d043912	1.2		sen+	1	17990846	17993750	UspA domain containing protein
Os01g0511600									Os01g0511600		-0.54	tol-					1	18013678	18017027	Similar to lrgB-like family protein
Os01g0512200																	1	18051553	18054687	Armadillo-type fold domain containing protein
Os01g0513100									Os01g0513100	-0.78		sen-					1	18087603	18092828	Similar to Protein phosphatase 2C ABI2
Os01g0513400	BRADI_2g13700v3	0.67		sen+													1	18124934	18128862	Protein of unknown function DUF789 family protein
Os01g0513700					HORVU4Hr1G027600		0.65	tol+									1	18135292	18138311	Similar to trafficking protein particle complex subunit 1
Os01g0514300	BRADI_2g13730v3	0.88		sen+													1	18163750	18173557	Armadillo-type fold domain containing protein
Os01g0515300									Os01g0515300	-1.64	-0.63	ΔLFC>1					1	18229321	18233091	Similar to Leucine Rich Repeat family protein
Os01g0518500																	1	18394242	18401686	Glycoside hydrolase family 27 protein
Os01g0521400									Os01g0521400		0.5	tol+					1	18593290	18597834	Similar to lipase family protein
Os01g0521600	BRADI_2g36788v3	3.1		sen+													1	18613736	18616526	Similar to NB-ARC domain containing protein expressed
Os01g0522400																	1	18639233	18641762	Armadillo-like helical domain containing protein
Os01g0523401	BRADI_1g05752v3	-1.71		sen-													1	18687833	18688211	Similar to ribosomal protein S18
Os01g0523800													Zm00001d051813	-1.78		sen-	1	18704760	18706173	Hypothetical conserved gene
Os01g0524500	BRADI_2g13860v3	-2.9		sen-													1	18755303	18756817	Conserved hypothetical protein
Os01g0524700									Os01g0524700	0.83	0.7						1	18763270	18774476	Armadillo-like helical domain containing protein
Os01g0526200	BRADI_2g03790v3	1.15		sen+													1	18853609	18857307	TRAUB family protein
Os01g0529800	BRADI_2g40410v3	-2.33		sen-													1	19059236	19061167	Similar to Very-long-chain fatty acid condensing enzyme CUT1
Os01g0530300																	1	19079255	19081450	SANT associated domain containing protein
Os01g0530366													Zm00001d005423	1.3		sen+	1	19085856	19088186	RNA polymerase Rbp10 domain containing protein
Os01g0531400	BRADI_2g50250v3	-1.55		sen-									Zm00001d043414	-2.57		sen-	1	19129984	19131278	Hypothetical conserved gene
Os01g0531500									Os01g0531500	0.55		sen+					1	19135843	19139893	Dienelactone hydrolase domain containing protein
Os01g0532100													Zm00001d044586	-2.18		sen-	1	19173908	19176093	Tetratricopeptide TPR2 domain containing protein
Os01g0532300	BRADI_1g23390v3	-3.51		sen-					Os01g0532300	-2.4	-0.93	ΔLFC>1					1	19200090	19201308	Conserved hypothetical protein
Os01g0533500					HORVU3Hr1G058470		0.61	tol+									1	19303393	19306036	Similar to Callose synthase 1 catalytic subunit
Os01g0534800																	1	19389831	19392838	Similar to PRLI-interacting factor K (Fragment)
Os01g0534900	BRADI_2g40490v3	1.92		sen+					Os01g0534900	0.75		sen+					1	19394542	19405480	Similar to Hv711N16.16 (Fragment)
Os01g0535900									Os01g0535900	-0.85	-0.74						1	19466307	19469005	Similar to methyltransferase
Os01g0536000									Os01g0536000		0.54	tol+					1	19469262	19477590	Similar to CBL-interacting serine/threonine-protein kinase 24 (EC 2.7.1.37) (SNF1-related kinase 3.11) (SALT OVERLY SENSITIVE 2 protein)
Os01g0537250									Os01g0537250	-1.7	-0.95						1	19549155	19550345	Protein of unknown function DUF3778 domain containing protein
Os01g0541800	BRADI_2g40537v3	-1.19		sen-													1	19959667	19961939	MtN3 and saliva related transmembrane protein family protein
Os01g0542000									Os01g0542000	-0.54	-0.67						1	19972083	19973030	Similar to DNA-damage-repair/toleration protein DRT102
Os01g0542700	BRADI_2g40582v3	1.89		sen+													1	20034162	20035006	bZIP transcription factor bZIP-1 domain containing protein
Os01g0543600													Zm00001d034986	1.38		sen+	1	20124194	20126848	Cytochrome P450 domain containing protein
Os01g0546400	BRADI_2g40632v3	-2.75		sen-					Os01g0546400	0.74	1.09		Zm00001d044535		1.54	tol+	1	20299783	20302467	Protein of unknown function DUF6 transmembrane domain containing protein
Os01g0546500	BRADI_2g40660v3	0.82		sen+													1	20312947	20314161	Pentatricopeptide repeat domain containing protein
Os01g0546800																	1	20317878	20319355	Pectate lyase-like protein Leaf senescenc
Os01g0547133													Zm00001d044534	-2.44		sen-	1	20338468	20342022	Similar to carboxyl-terminal proteinase
Os01g0547600	BRADI_2g40740v3	-2.37		sen-					Os01g0547600	1.54	1.46		Zm00001d044504		3.03	tol+	1	20385993	20388511	High-affinity nitrate transporter Nitrate transport Auxin signalin
Os01g0548750													Zm00001d044508	3.62		sen+	1	20468335	20469249	Gnk2-homologous domain domain containing protein
Os01g0549700	BRADI_2g40800v3	0.7		sen+													1	20540847	20547073	Similar to RNA helicase (Fragment)
Os01g0550200																	1	20595249	20598788	Cyclin-like F-box domain containing protein
Os01g0550300	BRADI_2g40870v3	1.54		sen+	HORVU5Hr1G111870		-0.76	tol-									1	20599445	20602258	Similar to Gda-1 protein
Os01g0551000	BRADI_2g40900v3	-1.63		sen-	HORVU3Hr1G112600		0.94	tol+	Os01g0551000	0.48		sen+	Zm00001d044518		0.78	tol+	1	20662993	20665013	Conserved hypothetical protein
Os01g0551400													Zm00001d001880	-1.28		sen-	1	20700553	20702884	Hypothetical conserved gene
Os01g0552300	BRADI_2g40950v3	-0.59		sen-									Zm00001d044525	-1.1		sen-	1	20738654	20742427	Similar to Protein phosphatase-2C
Os01g0555100																	1	20935789	20937436	Similar to TATA-binding protein associated factor 2N (RNA-binding protein 56) (TAFII68) (TAF(II)68)
Os01g0555200									Os01g0555200	1.3	0.99		Zm00001d009404	-1.68	-0.88		1	20938340	20941280	Asp/Glu racemase family protein
Os01g0555600	BRADI_2g41020v3	-1.74		sen-					Os01g0555600		-1.25	tol-					1	20950664	20951670	Dynein light chain type 1 family protein
Os01g0555800	BRADI_2g41027v3	-1.74		sen-					Os01g0555800		-1.22	tol-					1	20953961	20954922	Formylmethionine deformylase family protein
Os01g0556650									Os01g0556650	0.75	0.87						1	21039083	21040738	Hypothetical protein
Os01g0556700	BRADI_2g41060v3	-2.52		sen-					Os01g0556700	0.77	0.87		Zm00001d044529	-2.34	-1.53		1	21040111	21041071	Hypothetical conserved gene
Os01g0557100									Os01g0557100	-0.8		sen-					1	21056832	21058033	Alpha/beta hydrolase family protein
Os01g0557500									Os01g0557500	0.59	0.66		Zm00001d044533	-0.88		sen-	1	21071497	21076720	Cation/proton exchanger 1a
Os01g0558100									Os01g0558100	-0.89		sen-					1	21114757	21115731	Similar to Glutathione S-transferase TSI-1 (EC 2.5.1.18) (Glutathione S- transferase 1)
Os01g0558300	BRADI_2g41140v3	0.74		sen+													1	21124944	21128357	RWD domain containing protein
Os01g0558700	BRADI_2g41200v3	2.11		sen+									Zm00001d011164	3.22		sen+	1	21150419	21151079	Conserved hypothetical protein
Os01g0559000	BRADI_2g41230v3	1.08		sen+									Zm00001d044497	1.8		sen+	1	21167873	21172622	Protein of unknown function DUF1000 family protein
Os01g0559100	BRADI_1g71300v3	0.96		sen+													1	21175807	21179905	Similar to Seryl-tRNA synthetase (EC 6.1.1.11) (Serine--tRNA ligase) (SerRS) (Fragment)
Os01g0559500	BRADI_2g41260v3	-0.59		sen-													1	21195400	21201154	Pentatricopeptide repeat (PPR) protein Splicing of chloroplast mRNA Chloroplast development Abiotic stress respons
Os01g0559600					HORVU3Hr1G048520	-1.49	-1.6		Os01g0559600	-0.79	-0.41						1	21230393	21234906	Similar to C13 endopeptidase NP1 precursor
Os01g0559900									Os01g0559900	0.59	0.69						1	21261805	21262418	Non-protein coding transcript
Os01g0560000													Zm00001d044225	0.91		sen+	1	21265812	21270762	Similar to Auxin amidohydrolase
Os01g0563000									Os01g0563000	-1.33	-1.24						1	21415022	21441440	Hypothetical conserved gene
Os01g0564300									Os01g0564300		0.79	tol+					1	21525509	21549819	Peptidyl-prolyl cis-trans isomerase FKBP-type domain containing protein
Os01g0565800													Zm00001d044230	2.19		sen+	1	21628898	21630661	Protein of unknown function DUF538 family protein
Os01g0565900									Os01g0565900	-0.87	-0.63						1	21631182	21633086	Similar to Protein transport protein Sec61 beta subunit
Os01g0566000	BRADI_2g41380v3		-3.25	tol-													1	21633972	21635454	Armadillo-like helical domain containing protein
Os01g0566800													Zm00001d044242	-1.33		sen-	1	21687799	21689199	Hypothetical conserved gene
Os01g0567400													Zm00001d044244	1.53		sen+	1	21716142	21716605	Protein of unknown function DUF3511 domain containing protein
Os01g0568800	BRADI_2g12580v3	-8.3		sen-	HORVU6Hr1G088980		-2.8	tol-									1	21789247	21797054	Protein kinase catalytic domain domain containing protein
Os01g0570700	BRADI_2g41480v3	-1.06		sen-	HORVU3Hr1G049610	0.69		sen+					Zm00001d011192	-1.25		sen-	1	21896614	21897709	Carbamoyl-phosphate synthetase large subunit ATP-binding domain containing protein
Os01g0570800					HORVU3Hr1G049640		-1.48	tol-	Os01g0570800	-1.02	-1.04						1	21900067	21903103	IQ calmodulin-binding region domain containing protein
Os01g0571000	BRADI_2g41500v3	1.29		sen+													1	21918054	21921554	Mitochondrial carrier protein domain containing protein
Os01g0572300	BRADI_2g41550v3	1.81		sen+									Zm00001d044261	-1.02		sen-	1	21992992	21996997	Zinc finger C2H2-type domain containing protein
Os01g0574400																	1	22074387	22079852	Similar to Cell division protein ftsH (EC 3.4.24.-)
Os01g0574600	BRADI_2g41630v3	-1.15		sen-													1	22088204	22091018	Similar to Gamma hydroxybutyrate dehydrogenase (EC 1.1.1.61)
Os01g0574800													Zm00001d011217	-1.02		sen-	1	22098634	22099659	Harpin-induced 1 domain containing protein
Os01g0575000																	1	22120320	22128715	Root hair defective 3 GTP-binding family protein
Os01g0575200									Os01g0575200	-2.38	-1.35	ΔLFC>1					1	22138044	22142395	Helix-loop-helix DNA-binding domain containing protein
Os01g0578000													Zm00001d044278	-1.78		sen-	1	22353427	22358405	DNA repair protein DNA double-strand break repair synaptonemal complex assembl
Os01g0579600	BRADI_2g41730v3	0.6		sen+					Os01g0579600		-1.48	tol-	Zm00001d044285		1.7	tol+	1	22427835	22430779	Similar to Calcineurin B-like protein 9
Os01g0580100	BRADI_3g01150v3	0.68		sen+													1	22450498	22456233	Alg9-like mannosyltransferase family protein
Os01g0580150					HORVU6Hr1G005360		-1.16	tol-									1	22455140	22456347	Similar to Protein kinase
Os01g0580200																	1	22466601	22472572	Similar to Beta-galactosidase precursor (EC 3.2.1.23) (Lactase)
Os01g0580800	BRADI_2g41880v3	-1.96		sen-									Zm00001d044291	0.67		sen+	1	22494356	22500439	Similar to submergence induced protein SI397
Os01g0581300	BRADI_2g41890v3	-2.28		sen-													1	22535013	22538645	Similar to Lycopene epsilon-cyclase (Fragment)
Os01g0581400													Zm00001d011210	-1.33		sen-	1	22538998	22542226	Serine/threonine protein kinase-related domain containing protein
Os01g0582600									Os01g0582600		-0.62	tol-					1	22604528	22606674	Phospholipase A2 active site domain containing protein
Os01g0583100	BRADI_2g41950v3	2.46		sen+	HORVU3Hr1G050340		0.62	tol+	Os01g0583100	1.19	1.31		Zm00001d044301	1.14		sen+	1	22618198	22624094	Similar to Protein phosphatase 2C
Os01g0583200	BRADI_2g41957v3	1.17		sen+	HORVU3Hr1G050320	1.1		sen+					Zm00001d011199	-1.9		sen-	1	22625256	22628038	Zinc finger C2H2 LYAR-type domain containing protein
Os01g0584200	BRADI_2g41973v3	0.94		sen+													1	22683901	22688068	Similar to Myosin XI-K headless derivative (Fragment)
Os01g0584300									Os01g0584300		-0.69	tol-					1	22691686	22692492	Conserved hypothetical protein
Os01g0584900					HORVU3Hr1G050590		-3.47	tol-	Os01g0584900	-1.75	-0.75						1	22731943	22733237	WRKY transcription factor 28-like (WRKY5) (WRKY transcription factor 77)
Os01g0585100	BRADI_2g42030v3	1.05		sen+					Os01g0585100	2.15	1.48		Zm00001d011193	2.2		sen+	1	22742545	22747123	Similar to Integral membrane protein
Os01g0585300	BRADI_2g42040v3	-2.68	0.42	sen-/tol+	HORVU3Hr1G050800		-0.97	tol-					Zm00001d044310	-2.33		sen-	1	22754546	22755398	Protein of unknown function DUF1118 family protein
Os01g0585600													Zm00001d011231	0.84		sen+	1	22767949	22772615	Protein of unknown function DUF632 domain containing protein
Os01g0585700																	1	22779111	22782682	SIT4 phosphatase-associated protein family protein
Os01g0587300																	1	22868546	22871788	Similar to C2 domain-containing protein
Os01g0587400	BRADI_2g57410v3	-1.95		sen-													1	22879904	22895941	Serine/threonine protein kinase-related domain containing protein
Os01g0588200	BRADI_2g42137v3	1.05		sen+													1	22908290	22910674	Voltage-dependent anion channel
Os01g0588800					HORVU3Hr1G050760		0.72	tol+									1	22948164	22952187	Protein of unknown function DUF185 family protein
Os01g0588900	BRADI_2g42190v3	1.57		sen+													1	22955070	22959148	Cytokinin-activating enzyme Bioactive cytokinin synthesi
Os01g0589000	BRADI_2g42220v3	-0.9		sen-					Os01g0589000	0.83		sen+	Zm00001d044328	-1.2		sen-	1	22980027	22983152	Nucleic acid-binding OB-fold domain containing protein
Os01g0590700									Os01g0590700	0.51		sen+					1	23073608	23079776	Peptidase M41 domain containing protein
Os01g0591000					HORVU3Hr1G092680	1.36		sen+	Os01g0591000	0.69		sen+					1	23097292	23106301	Aldehyde/histidinol dehydrogenase domain containing protein
Os01g0591300					HORVU0Hr1G031700		-1.39	tol-	Os01g0591300	-0.81		sen-					1	23113647	23120516	Similar to Cytosolic aldehyde dehydrogenase RF2D
Os01g0592900																	1	23174817	23187023	Similar to regulator of telomere elongation helicase 1
Os01g0594800									Os01g0594800	2.11		sen+					1	23301874	23306377	Similar to D-amino acid oxidase
Os01g0594900																	1	23311205	23312581	Conserved hypothetical protein
Os01g0595400	BRADI_2g42560v3	-0.69		sen-									Zm00001d011275	1.07		sen+	1	23333024	23337221	Protein of unknown function DUF538 family protein
Os01g0595600	BRADI_2g42570v3	0.88		sen+					Os01g0595600	-1.15	-0.71						1	23343306	23345362	Alpha/beta hydrolase fold-1 domain containing protein
Os01g0598200													Zm00001d044389	1.84		sen+	1	23498445	23502375	Similar to Calcineurin B-like protein 8
Os01g0598400	BRADI_2g42637v3	1.13		sen+													1	23510098	23512343	Cyclin-like F-box domain containing protein
Os01g0598600	BRADI_2g42650v3	1.41		sen+													1	23515008	23516765	Peptidase A1 domain containing protein
Os01g0600200																	1	23569843	23576519	Ser/Thr specific protein phosphatase 2A B regulatory subunit beta isoform
Os01g0600300													Zm00001d044394	-1.2		sen-	1	23577237	23580592	Conserved hypothetical protein
Os01g0600500													Zm00001d044395		0.65	tol+	1	23584039	23585690	Similar to Phosphoethanolamine/phosphocholine phosphatase
Os01g0600900	BRADI_1g12130v3	-4.08	1.91	sen-/tol+	HORVU1Hr1G078380	-2.72		sen-	Os01g0600900	-0.73	-1.33		Zm00001d011285	-5.3		sen-	1	23607363	23608541	Chlorophyll a-b binding protein 2 chloroplast precursor (LHCII type I CAB-2) (LHCP)
Os01g0601000	BRADI_2g42730v3	5.33		sen+													1	23611048	23615257	Mg2+ transporter protein CorA-like/Zinc transport protein ZntB domain containing protein
Os01g0601200													Zm00001d039180	-2.59		sen-	1	23624289	23626972	Similar to Protein kinase family protein
Os01g0601625					HORVU6Hr1G092010		-1.02	tol-	Os01g0601625	-1.67		sen-					1	23631980	23635375	Leucine rich repeat N-terminal domain containing protein
Os01g0602400													Zm00001d002937	-1.7		sen-	1	23673178	23675960	Similar to Cytochrome P450 monooxygenase CYP72A5 (Fragment)
Os01g0602800	BRADI_2g42830v3	-1.31		sen-									Zm00001d044405	-2.7		sen-	1	23727763	23733053	Serine/threonine protein kinase-related domain containing protein
Os01g0603300	BRADI_2g42870v3	-2.38		sen-	HORVU3Hr1G052710		-1.89	tol-					Zm00001d011297	-2.4	1.47	sen-/tol+	1	23760347	23762387	Similar to MCB2 protein
Os01g0604150					HORVU6Hr1G002630		-1.29	tol-									1	23787960	23789747	Leucine-rich repeat domain containing protein
Os01g0604500													Zm00001d044411	1.82		sen+	1	23810484	23811557	EF-Hand type domain containing protein
Os01g0605100	BRADI_2g42940v3	1.36		sen+	HORVU3Hr1G052880		-2.52	tol-									1	23838868	23840725	Similar to BCS1 protein-like protein
Os01g0605700									Os01g0605700	1.4	1.3						1	23864681	23867205	MtN3 and saliva related transmembrane protein family protein
Os01g0606900	BRADI_2g43040v3	3.54		sen+					Os01g0606900		-1.45	tol-					1	23911517	23913239	Heat shock protein DnaJ N-terminal domain containing protein
Os01g0607200					HORVU3Hr1G017330		-2.33	tol-	Os01g0607200	-0.97		sen-	Zm00001d044431	1.87		sen+	1	23923718	23933449	Amino acid permease subfamily protein
Os01g0607300									Os01g0607300		-1.51	tol-					1	23934148	23937209	Small ubiquitin-related modifier SUMO domain containing protein
Os01g0607600									Os01g0607600	1.12		sen+					1	23947829	23962251	WD40 repeat domain containing protein
Os01g0607800	BRADI_2g43100v3	-1.73		sen-									Zm00001d011311	-3.81		sen-	1	23970594	23972310	Pentatricopeptide repeat domain containing protein
Os01g0607900													Zm00001d044434	-1.81		sen-	1	23976021	23981901	Serine/threonine protein kinase-related domain containing protein
Os01g0609300					HORVU3Hr1G053350		-1.1	tol-	Os01g0609300	-1.05		sen-					1	24075070	24081389	Similar to Pleiotropic drug resistance protein 3
Os01g0609900	BRADI_2g43150v3	-0.87		sen-	HORVU3Hr1G053380	0.84		sen+	Os01g0609900	-2.44	-1.03	ΔLFC>1					1	24107086	24115287	Similar to Pleiotropic drug resistance protein 4
Os01g0610300													Zm00001d052353	-0.76		sen-	1	24136871	24144292	Bromo adjacent region domain containing protein
Os01g0610500	BRADI_2g43200v3	0.65		sen+													1	24151040	24154089	Yip1 domain containing protein
Os01g0610800													Zm00001d044452	-3.39	-1.82	ΔLFC>1	1	24168245	24170219	Thrombospondin type 1 repeat domain containing protein
Os01g0611000													Zm00001d044455	-5.33		sen-	1	24181111	24183979	Protein of unknown function DUF642 domain containing protein
Os01g0611300									Os01g0611300		-1.23	tol-					1	24195504	24196616	Similar to Metal tolerance protein 7
Os01g0612000	BRADI_2g43310v3	0.6		sen+													1	24245869	24249361	Similar to DNA methyl transferase4
Os01g0612500									Os01g0612500	1.98	1.82						1	24277095	24280999	Phospholipase/carboxylesterase domain containing protein
Os01g0612600																	1	24282911	24285306	Protein of unknown function DUF1644 family protein
Os01g0612800	BRADI_2g43367v3	-0.71		sen-									Zm00001d044464	-0.93		sen-	1	24300144	24301062	Conserved hypothetical protein
Os01g0612900	BRADI_2g43380v3	-1.91		sen-													1	24312652	24317113	Lipase GDSL domain containing protein
Os01g0613300													Zm00001d044467	1.51		sen+	1	24341214	24343585	Conserved hypothetical protein CHP02058 domain containing protein
Os01g0613500	BRADI_2g43410v3	-5.68		sen-	HORVU3Hr1G053900		-1.3	tol-									1	24343518	24345172	Peptidase C1A papain family protein
Os01g0613800									Os01g0613800	-2.7	-1.56	ΔLFC>1					1	24351308	24353345	Peptidase C1A papain family protein
Os01g0613900	BRADI_2g43437v3	-0.91		sen-													1	24354168	24360484	Hypothetical conserved gene
Os01g0614500	BRADI_2g43460v3	0.63		sen+													1	24369103	24372156	Nucleotide-binding alpha-beta plait domain containing protein
Os01g0614900													Zm00001d011347	1.59		sen+	1	24380637	24386666	NAD(P)-binding domain containing protein
Os01g0615100					HORVU2Hr1G028670	7.61		sen+									1	24392841	24393423	Chymotrypsin protease inhibitor Salt and osmotic stress toleranc
Os01g0615200					HORVU3Hr1G096360		-2.25	tol-									1	24395081	24396820	Transferase family protein
Os01g0615300													Zm00001d011349	1.09		sen+	1	24397564	24400652	Transferase family protein
Os01g0615500													Zm00001d044476		-4.01	tol-	1	24408462	24410310	ABC transporter-like domain containing protein
Os01g0616900	BRADI_2g43640v3	-0.76		sen-					Os01g0616900		-0.79	tol-					1	24498873	24504951	Ctps protein
Os01g0617700									Os01g0617700	0.57		sen+					1	24559329	24568659	Similar to CENP-C (Fragment)
Os01g0617900	BRADI_2g43680v3	-0.86		sen-									Zm00001d011362	-1.23		sen-	1	24572983	24575556	Similar to oxygen-evolving complex-related
Os01g0618100	BRADI_2g43690v3	1.2		sen+													1	24579647	24582075	Similar to IN2-2 protein
Os01g0618300					HORVU7Hr1G116510		-4.51	tol-									1	24592460	24596220	Armadillo-type fold domain containing protein
Os01g0618400	BRADI_2g43710v3		0.68	tol+									Zm00001d044208	-2.52	-0.78	ΔLFC>1	1	24598181	24601809	Similar to RNA helicase (Fragment)
Os01g0618700													Zm00001d011365	3.46		sen+	1	24614231	24615465	Lipase class 3 family protein
Os01g0618800	BRADI_2g43740v3	-1.62		sen-									Zm00001d011366	-0.67		sen-	1	24616103	24618581	Similar to ATP-dependent zinc metalloprotease FTSH 9 chloroplastic/mitochondrial
Os01g0618900	BRADI_2g43750v3	-0.97		sen-									Zm00001d011369	-2.13		sen-	1	24630323	24632327	Similar to Polygalacturonase
Os01g0619100													Zm00001d044194		0.99	tol+	1	24643224	24644218	R3 MYB transcription facto
Os01g0619900									Os01g0619900	-0.73	-0.56						1	24696532	24697792	Similar to DNA binding
Os01g0621200	BRADI_2g43820v3	-0.63		sen-									Zm00001d044192	-1.56		sen-	1	24753864	24758578	Similar to proline transporter
Os01g0621300									Os01g0621300		0.6	tol+					1	24763107	24768254	Hypothetical conserved gene
Os01g0621600													Zm00001d011378	2.34		sen+	1	24784609	24788153	Serine/threonine protein kinase-related domain containing protein
Os01g0621900	BRADI_2g43880v3	-0.58		sen-					Os01g0621900	0.73		sen+	Zm00001d044189		-0.82	tol-	1	24808516	24813386	Similar to OSIGBa0097P08.1 protein
Os01g0622300	BRADI_2g43900v3	-1.19		sen-									Zm00001d011386	-1.77		sen-	1	24823998	24828139	Similar to Plastid uroporphyrinogen decarboxylase (Fragment)
Os01g0622600									Os01g0622600	-0.48		sen-					1	24839124	24843459	Calcium-dependent protein kinase Positive regulation of salt and drought tolerance Negative regulation of seedling growth and seed development Regulation of pathogenesis-related genes involved in disease resistanc
Os01g0623200													Zm00001d011393	3.3		sen+	1	24861697	24864291	Similar to C4-dicarboxylate transporter/malic acid transport protein
Os01g0623500					HORVU3Hr1G055830		-1.22	tol-									1	24894706	24899506	ATPase AAA-type core domain containing protein
Os01g0624000	BRADI_2g44010v3	0.77		sen+	HORVU3Hr1G055870	0.85	1.17										1	24913551	24924014	Neutral/alkaline nonlysosomal ceramidase family protein
Os01g0624700	BRADI_2g44035v3	-2.25		sen-													1	24945282	24947217	Similar to WRKY transcription factor 12
Os01g0625900													Zm00001d044167	-2.04		sen-	1	24981269	24982666	Ovate Family Protein Hormonal homeostasis Vasculature developmen
Os01g0626100																	1	24994743	24997782	Armadillo-like helical domain containing protein
Os01g0626300	BRADI_2g44081v3	0.62		sen+													1	25004123	25004701	Similar to Mitochondrial import receptor subunit TOM7-1 (Translocase of outer membrane 7 kDa subunit 1)
Os01g0626400													Zm00001d011413	1.47		sen+	1	25009514	25012233	WRKY transcription factor Control of flowering time and plant heigh
Os01g0627600	BRADI_2g44150v3	2.53		sen+	HORVU6Hr1G088960		-2.31	tol-									1	25055850	25058085	Similar to Cytochrome P450 monooxygenase
Os01g0627800	BRADI_2g44170v3	-1.23		sen-					Os01g0627800	0.89		sen+	Zm00001d044156	1.62		sen+	1	25060764	25063562	Similar to Cytochrome P450 monooxygenase CYP72A5 (Fragment)
Os01g0628700	BRADI_2g44300v3	-0.96		sen-					Os01g0628700	-0.62	-0.47						1	25114083	25118356	Cytochrome P450
Os01g0629400									Os01g0629400		0.58	tol+					1	25132887	25138118	NLI interacting factor domain containing protein
Os01g0629600																	1	25144502	25145949	Peptidase S10 serine carboxypeptidase family protein
Os01g0629750									Os01g0629750	0.54		sen+					1	25146732	25147447	Conserved hypothetical protein
Os01g0630300																	1	25190735	25191743	Helix-loop-helix DNA-binding domain containing protein
Os01g0631200													Zm00001d011428		-1.32	tol-	1	25234709	25238165	Similar to siroheme uroporphyrinogen methyltransferase1
Os01g0631400	BRADI_2g44377v3	-3.69		sen-	HORVU3Hr1G056830		-1.01	tol-					Zm00001d044136		3.64	tol+	1	25257001	25263141	Six-hairpin glycosidase domain containing protein
Os01g0631700													Zm00001d011433	-1.86		sen-	1	25282067	25286614	Similar to Ser Thr specific protein kinase-like protein
Os01g0631800					HORVU3Hr1G056640		-3.83	tol-									1	25288392	25289157	Conserved hypothetical protein
Os01g0633000	BRADI_2g44440v3	-1.61		sen-									Zm00001d044130	-1.69		sen-	1	25350681	25351536	Similar to 50S ribosomal protein L31
Os01g0633200									Os01g0633200		0.48	tol+					1	25363099	25367117	Similar to X1 (Fragment)
Os01g0633400	BRADI_2g44467v3	2.29		sen+					Os01g0633400		0.86	tol+	Zm00001d044124	5.43		sen+	1	25368481	25371006	Cystathionine beta-synthase core domain containing protein
Os01g0633500													Zm00001d011438	2.57		sen+	1	25382714	25384678	Dihydroflavonol-4-reductase (DFR) Proanthocyanidin synthesi
Os01g0634300	BRADI_2g44490v3	-0.7		sen-													1	25420384	25425723	Conserved hypothetical protein
Os01g0635200	BRADI_2g44520v3	-3.68		sen-					Os01g0635200	-1.25	-1.43						1	25462003	25463635	Homeodomain-like containing protein
Os01g0635400	BRADI_2g44530v3	-1.87		sen-													1	25466388	25474144	Similar to mRNA-associated protein mrnp 41 (Rae1 protein homolog)
Os01g0635550	BRADI_2g44540v3	-2.58		sen-					Os01g0635550		-0.79	tol-					1	25476388	25477555	ZF-HD homeobox protein Cys/His-rich dimerisation region domain containing protein
Os01g0636400	BRADI_2g44550v3	1.78		sen+													1	25501902	25504409	Alpha/beta hydrolase family protein
Os01g0637600	BRADI_2g44760v3		0.98	tol+													1	25585914	25589162	Similar to Peptide deformylase chloroplast precursor (EC 3.5.1.88) (PDF) (Polypeptide deformylase)
Os01g0638000	BRADI_2g44820v3	-1.86		sen-	HORVU5Hr1G104580		-1.6	tol-					Zm00001d044106	0.9		sen+	1	25598451	25600345	UDP-glucuronosyl/UDP-glucosyltransferase family protein
Os01g0638600									Os01g0638600	0.67		sen+					1	25615791	25617367	UDP-glucose-dependent glycosyltransferas
Os01g0638800													Zm00001d044105	2		sen+	1	25627240	25627872	Hypothetical conserved gene
Os01g0639600	BRADI_2g44840v3	-1.91		sen-					Os01g0639600	-0.83		sen-					1	25681571	25682862	Protein of unknown function DUF1645 family protein
Os01g0639900	BRADI_2g44856v3	-4.05		sen-	HORVU3Hr1G057090		-0.91	tol-	Os01g0639900	0.4	-0.39	sen+/tol-	Zm00001d011454	-1.09		sen-	1	25696671	25705077	beta-carbonic anhydrase (EC:4.2.1.1) Carbon assimilation CO<sub>2</sub>-mediated stomatal pore respons
Os01g0640700													Zm00001d044093	1.44		sen+	1	25748348	25750451	Similar to vegetative cell wall protein gp1
Os01g0640800	BRADI_2g44900v3	-0.89		sen-													1	25752298	25755783	Similar to radical SAM domain-containing protein
Os01g0641100	BRADI_2g44920v3	-0.78		sen-													1	25762489	25766525	Similar to HD domain containing protein
Os01g0641700																	1	25777616	25781934	Uncharacterised protein family UPF0121 domain containing protein
Os01g0641800	BRADI_2g44936v3	0.98		sen+													1	25788671	25790988	Similar to Carbonic anhydrase
Os01g0642000	BRADI_2g44942v3	1.33		sen+	HORVU3Hr1G057530	-1.28		sen-	Os01g0642000	2.44	1.7		Zm00001d044088	1.25		sen+	1	25792699	25797614	Carboxylesterase type B family protein
Os01g0642900	BRADI_2g44970v3	1.47		sen+													1	25841673	25843494	Nucleic acid-binding OB-fold domain containing protein
Os01g0644000	BRADI_2g45030v3	11.67		sen+					Os01g0644000	1.02		sen+	Zm00001d011467	-1.63		sen-	1	25926370	25928206	Twin-arginine translocation pathway signal domain containing protein
Os01g0644200	BRADI_2g45050v3	7.08		sen+									Zm00001d044078	4.5		sen+	1	25931149	25931730	Similar to Little protein 1
Os01g0644600													Zm00001d044076	1.66		sen+	1	25949366	25950192	Glutelin family protein
Os01g0644900	BRADI_2g45080v3	3.49		sen+									Zm00001d044075	5.25		sen+	1	25957753	25958568	Conserved hypothetical protein
Os01g0645200									Os01g0645200		0.47	tol+					1	25973499	25980398	Hypothetical conserved gene
Os01g0645400					HORVU3Hr1G057950		-2.32	tol-									1	25994669	25996837	Flavin monooxygenase-like enzyme Auxin biosynthesi
Os01g0645900									Os01g0645900	-1.07		sen-					1	26033145	26034815	Similar to sulfate transporter
Os01g0646300																	1	26044168	26045843	Similar to RGA2 protein
Os01g0647000	BRADI_2g45130v3	1.01		sen+					Os01g0647000	0.67		sen+					1	26075030	26076876	Cyclin-like F-box domain containing protein
Os01g0647200									Os01g0647200		0.45	tol+					1	26086062	26088337	Hypothetical conserved gene
Os01g0647700																	1	26106836	26111089	Epoxide hydrolase family protein
Os01g0648000	BRADI_2g45170v3	-0.65		sen-									Zm00001d011473		2.58	tol+	1	26119741	26126165	Potassium channel Potassium uptake Salt stress toleranc
Os01g0650100									Os01g0650100	0.96		sen+					1	26235768	26238284	Similar to Esterase
Os01g0651300	BRADI_2g45280v3	-1.07		sen-	HORVU3Hr1G058610		-1.56	tol-									1	26306238	26307237	Similar to GDSL-motif lipase/hydrolase-like protein
Os01g0651932																	1	26364766	26367362	Hypothetical conserved gene
Os01g0652100	BRADI_2g45320v3	-1.99		sen-									Zm00001d044037	-2.69		sen-	1	26368398	26374101	Protein of unknown function DUF231 plant domain containing protein
Os01g0652600	BRADI_2g45330v3	0.61		sen+													1	26392164	26396100	Similar to Ketol-acid reductoisomerase chloroplast precursor (EC 1.1.1.86) (Acetohydroxy-acid reductoisomerase) (Alpha-keto-beta-hydroxylacil reductoisomerase)
Os01g0652800	BRADI_2g45350v3	1.11		sen+									Zm00001d044033	-1.71		sen-	1	26401569	26403477	Protein of unknown function DUF231 plant domain containing protein
Os01g0653800													Zm00001d044026	0.87		sen+	1	26453784	26465951	Similar to predicted protein
Os01g0654100									Os01g0654100	-2.1	-1.44						1	26514543	26521761	Similar to CTP synthase (EC 6.3.4.2) (UTP--ammonia ligase) (CTP synthetase)
Os01g0654200													Zm00001d044023	-0.81		sen-	1	26522784	26527301	Peptidase M50 domain containing protein
Os01g0654400	BRADI_2g45410v3	9.25		sen+													1	26532021	26532497	Similar to Salt tolerant correlative protein
Os01g0654500									Os01g0654500	-0.6	-0.63		Zm00001d011487	0.95		sen+	1	26533072	26537108	Similar to NADP-isocitrate dehydrogenase
Os01g0656200	BRADI_2g45470v3	5.5		sen+	HORVU3Hr1G059170	2.13	2.17		Os01g0656200	0.85		sen+					1	26652966	26658299	Protein phosphatase 2C family protein
Os01g0656400									Os01g0656400	-1.09	-0.9						1	26687377	26688416	Similar to WRKY transcription factor 15
Os01g0656600	BRADI_2g45490v3	-0.83		sen-													1	26699254	26701573	Conserved hypothetical protein
Os01g0657100	BRADI_2g45520v3	-2.95		sen-													1	26724948	26726953	Pi transporter Arbuscular mycorrhiza (AM)-specific signaling pathwa
Os01g0658400	BRADI_2g45550v3	-1.27		sen-	HORVU3Hr1G059290	-1.14	-1.17						Zm00001d043998		0.81	tol+	1	26781113	26784353	Ubiquitin-conjugating enzyme E
Os01g0660200	BRADI_2g45610v3	-1.54		sen-					Os01g0660200	-2.74	-0.78	ΔLFC>1	Zm00001d043988	2.86		sen+	1	26885484	26886719	Acidic class III chitinase OsChib3a precursor (Chitinase) (EC 3.2.1.14)
Os01g0660300	BRADI_2g45620v3	-0.91		sen-	HORVU3Hr1G059470		-1.15	tol-	Os01g0660300	-1.15		sen-					1	26888425	26895926	Similar to Pyruvate kinase
Os01g0660900	BRADI_2g45670v3	-1.05		sen-													1	26971446	26973519	Similar to phosphoglycerate mutase family protein
Os01g0661000													Zm00001d043984	-1.03		sen-	1	26975616	26978062	Uncharacterised protein family UPF0497 trans-membrane plant domain containing protein
Os01g0661400					HORVU3Hr1G059710	1.09	1.05										1	27004281	27008038	S1 RNA binding domain containing protein
Os01g0661500	BRADI_2g45700v3	-0.72		sen-													1	27008803	27012114	Mov34/MPN/PAD-1 family protein
Os01g0661650													Zm00001d043973	2.18		sen+	1	27017521	27018815	Hypothetical conserved gene
Os01g0662300									Os01g0662300		-0.87	tol-					1	27041773	27042644	Similar to Isoform 2 of 50S ribosomal protein L12 chloroplastic
Os01g0662700	BRADI_2g45757v3	-2.12	0.65	sen-/tol+					Os01g0662700		-0.78	tol-	Zm00001d043970	-1.37		sen-	1	27050876	27054574	Similar to Naphthoate synthase (EC 4.1.3.36)
Os01g0663051									Os01g0663051		-1.53	tol-					1	27062505	27064276	Similar to SANT/MYB protein
Os01g0664000	BRADI_2g45830v3	-1.35		sen-	HORVU3Hr1G060150	-0.69		sen-					Zm00001d011518	-1.77		sen-	1	27115631	27120123	Similar to carboxyl-terminal-processing protease
Os01g0664100	BRADI_2g45840v3	0.84		sen+													1	27123488	27129361	Mg2+ transporter protein CorA-like/Zinc transport protein ZntB domain containing protein
Os01g0664200																	1	27130541	27134194	Similar to Ser Thr specific protein kinase-like protein
Os01g0664500									Os01g0664500	0.69	0.5						1	27145068	27149003	Lg106-like family protein
Os01g0665200					HORVU3Hr1G060390	-1.24		sen-	Os01g0665200	0.97	0.71						1	27171290	27178237	Similar to Blast and wounding induced mitogen-activated protein kinase
Os01g0665300	BRADI_2g45880v3	0.63		sen+													1	27178705	27183840	Similar to CTD-phosphatase-like protein
Os01g0665500									Os01g0665500	-1		sen-					1	27196814	27197158	Similar to WRKY transcription factor 16
Os01g0665750									Os01g0665750	-1.23		sen-					1	27198727	27199216	Similar to WRKY transcription factor 16
Os01g0666000					HORVU3Hr1G060600		-5.39	tol-									1	27226175	27230292	Similar to Lipid phosphate phosphatase 2 (EC 3.1.3.-) (AtLPP2) (Phosphatidic acid phosphatase 2) (AtPAP2) (Prenyl diphosphate phosphatase)
Os01g0666400	BRADI_2g45940v3	-1.08		sen-									Zm00001d011531	-1.04		sen-	1	27240118	27241139	Similar to predicted protein
Os01g0666600									Os01g0666600	0.43	0.81		Zm00001d043944		0.92	tol+	1	27246279	27247948	Conserved hypothetical protein
Os01g0666800																	1	27257387	27266432	Similar to predicted protein
Os01g0667200					HORVU3Hr1G060850		1.28	tol+									1	27274750	27278556	Mitochondrial sulfur dioxygenase Abiotic stress respons
Os01g0667600									Os01g0667600	-1.38		sen-					1	27301548	27302922	Similar to GTP-binding protein
Os01g0667900					HORVU3Hr1G061080		-1.42	tol-									1	27326050	27327025	CC-type glutaredoxin Homeostatic regulation of nitrogen use Hormone signalin
Os01g0668100													Zm00001d043929	-3.44		sen-	1	27340911	27341950	Similar to Arabinogalactan-like protein
Os01g0668600									Os01g0668600	-0.95		sen-					1	27375122	27377698	Curculin-like (mannose-binding) lectin domain containing protein
Os01g0669100					HORVU1Hr1G080600		-1.58	tol-									1	27417284	27420084	S-domain receptor-like kinase OsPR1b-interacting factor Resistance protein Grain yield Disease resistanc
Os01g0670800									Os01g0670800	0.85		sen+					1	27501506	27507181	Similar to Auxin response factor 2
Os01g0672400					HORVU3Hr1G061690		-0.65	tol-									1	27601487	27604913	Drought induced 19 family protein
Os01g0672500	BRADI_2g46250v3	0.68		sen+					Os01g0672500	-0.55		sen-					1	27606058	27608639	Glycosyl transferase family 48 protein
Os01g0672600									Os01g0672600	-0.83		sen-					1	27623546	27623897	Non-protein coding transcript
Os01g0672800													Zm00001d043906	-0.96		sen-	1	27631023	27633082	Protein of unknown function DUF1421 domain containing protein
Os01g0673700									Os01g0673700	-0.88	-0.93						1	27676501	27681662	Similar to Dof3 (Fragment)
Os01g0673800	BRADI_2g46306v3	-0.9		sen-									Zm00001d011569	-0.99		sen-	1	27677194	27681560	Similar to ATP synthase protein I -related
Os01g0674000																	1	27690597	27691968	Homeodomain-like containing protein
Os01g0674400	BRADI_2g46345v3	-1.18		sen-													1	27714540	27715226	Hypothetical conserved gene
Os01g0674700	BRADI_2g46360v3	-0.8		sen-									Zm00001d011579	-1.15		sen-	1	27725579	27731480	Similar to EMB2279 (EMBRYO DEFECTIVE 2279)
Os01g0674800									Os01g0674800	-0.88		sen-	Zm00001d011580	1.32		sen+	1	27737142	27739719	Serine/threonine-specific protein kinase NPK15-like
Os01g0675700	BRADI_2g46420v3	-0.72		sen-													1	27777432	27780995	Similar to Auxin-responsive protein IAA14 (Indoleacetic acid-induced protein 14) (SOLITARY-ROOT protein)
Os01g0675800																	1	27780948	27782265	No apical meristem (NAM) protein domain containing protein
Os01g0676200	BRADI_2g46450v3	-1.95		sen-					Os01g0676200	0.48	-0.57	sen+/tol-					1	27801413	27802410	Conserved hypothetical protein
Os01g0677100																	1	27843400	27844850	Conserved hypothetical protein
Os01g0677900									Os01g0677900	-2.1	-0.78	ΔLFC>1					1	27868771	27871845	Protein of unknown function DUF2921 domain containing protein
Os01g0678000	BRADI_2g46502v3	-1.37		sen-	HORVU3Hr1G062430		-3.82	tol-	Os01g0678000	-2.34	-0.94	ΔLFC>1					1	27875639	27878341	Protein of unknown function DUF2921 domain containing protein
Os01g0678100									Os01g0678100	-0.75		sen-					1	27883020	27886068	Protein of unknown function DUF2921 domain containing protein
Os01g0678500																	1	27906660	27920949	Voltage-gated Ca2+ channel protein Elicitor-induced defense reponses Hypersensitive cell death Activation of MAPK cascad
Os01g0678600	BRADI_2g46520v3	-1.46		sen-									Zm00001d011596	-1.78		sen-	1	27922318	27924335	Ribosomal protein S20 family protein
Os01g0678800	BRADI_2g46540v3	-2.53		sen-													1	27930111	27930950	Heavy metal transport/detoxification protein domain containing protein
Os01g0679550																	1	27960362	27961312	Similar to Aspartic proteinase nepenthesin-2
Os01g0679700	BRADI_2g46580v3	0.79		sen+	HORVU3Hr1G062590	0.93		sen+					Zm00001d004009	-1.37		sen-	1	27965722	27968107	Similar to 60S ribosomal protein L37a
Os01g0679900													Zm00001d011602	1.19		sen+	1	27983688	27990347	Similar to Ythdf2-prov protein
Os01g0680400									Os01g0680400	0.52		sen+					1	28009051	28011750	Histone-fold domain containing protein
Os01g0680600	BRADI_1g52374v3	-1.22		sen-									Zm00001d011585	-2.23		sen-	1	28012679	28013739	Conserved hypothetical protein
Os01g0681000	BRADI_2g46640v3	6.48		sen+					Os01g0681000	-1.66	-1.84						1	28033034	28051826	Uncharacterised protein family UPF0089 domain containing protein
Os01g0681200	BRADI_4g44540v3	3.06		sen+					Os01g0681200	-1.07	-0.65						1	28061734	28067159	Similar to Acyl-CoA synthetase (EC 6.2.1.3)
Os01g0681700									Os01g0681700	-1.74	-0.97						1	28085781	28086459	Hypothetical conserved gene
Os01g0681800	BRADI_2g46665v3	-2.97		sen-					Os01g0681800	-2.42	-1.64						1	28088399	28089095	Conserved hypothetical protein
Os01g0682001	BRADI_2g46670v3	-1.22		sen-									Zm00001d043845		-1.54	tol-	1	28098847	28102930	Similar to NADH dependent Glutamate Synthase
Os01g0682200	BRADI_1g16151v3	-1.11		sen-													1	28118327	28119161	Similar to predicted protein
Os01g0682500	BRADI_2g46690v3	-2.05	0.43	sen-/tol+									Zm00001d035737	-2.05		sen-	1	28126575	28130263	Similar to Protein Kinase C630.09c
Os01g0683400																	1	28161732	28166115	Similar to Origin recognition complex 4
Os01g0683700	BRADI_2g46740v3	1.47		sen+													1	28176745	28177756	Protein of unknown function DUF599 family protein
Os01g0684900					HORVU3Hr1G063430		-0.68	tol-									1	28235071	28238631	Multi antimicrobial extrusion protein MatE family protein
Os01g0685100									Os01g0685100	0.78	0.94						1	28240209	28242532	Conserved hypothetical protein
Os01g0685400	BRADI_2g46770v3	0.97		sen+													1	28250506	28251508	Homeodomain-like domain containing protein
Os01g0685900													Zm00001d043831	-1.49		sen-	1	28282813	28287091	Similar to 65kD microtubule associated protein
Os01g0686000													Zm00001d043830	1.91		sen+	1	28289381	28290175	Similar to cDNA clone: J100026I16 full insert sequence
Os01g0686200									Os01g0686200		1.04	tol+					1	28303270	28304839	UDP-glucuronosyl/UDP-glucosyltransferase family protein
Os01g0686300	BRADI_2g46820v3	-1.47		sen-													1	28307652	28309500	UDP-glucuronosyl/UDP-glucosyltransferase family protein
Os01g0686700	BRADI_2g46835v3	2.92		sen+					Os01g0686700	1.75	1.88						1	28325379	28327645	Similar to protein binding protein
Os01g0687300	BRADI_2g46850v3	-1.68		sen-					Os01g0687300		0.5	tol+					1	28345842	28350882	Conserved hypothetical protein
Os01g0687500													Zm00001d043815	-1.86		sen-	1	28364038	28368033	Methionine tRNA Formyltransferase-like domain containing protein
Os01g0688200					HORVU3Hr1G063840		-0.98	tol-					Zm00001d011619	0.91		sen+	1	28384023	28387157	Similar to hydrolase alpha/beta fold family protein
Os01g0688300																	1	28403683	28404693	Similar to Isopentenyl transferase IPT8
Os01g0689000																	1	28431993	28433405	Protein of unknown function DUF1639 family protein
Os01g0689451																	1	28447888	28458988	Similar to predicted protein
Os01g0689600	BRADI_2g46970v3	0.65		sen+													1	28467690	28471172	Hypothetical conserved gene
Os01g0689800																	1	28479278	28482802	Alpha/beta hydrolase fold-1 domain containing protein
Os01g0689900	BRADI_2g47000v3	1.66		sen+					Os01g0689900	-0.54		sen-	Zm00001d043800	1.33		sen+	1	28482950	28496176	Hypothetical conserved gene
Os01g0690200	BRADI_2g47021v3	1.74		sen+	HORVU3Hr1G064180		-1.68	tol-									1	28502293	28503364	Hypothetical conserved gene
Os01g0690600									Os01g0690600	-2.16		sen-					1	28513039	28517678	Conserved hypothetical protein
Os01g0690800									Os01g0690800	-1.08		sen-					1	28524105	28534387	Protein kinase core domain containing protein
Os01g0691000	BRADI_2g47196v3	1.73		sen+													1	28534821	28536497	Similar to Acidic endochitinase SE2 precursor (EC 3.2.1.14)
Os01g0691500	BRADI_2g47080v3	-0.57		sen-					Os01g0691500	0.51		sen+					1	28541558	28545424	Cytidylyltransferase domain containing protein
Os01g0691700	BRADI_2g47100v3	-0.66		sen-													1	28555960	28560504	Similar to Serine/threonine protein phosphatase 2A
Os01g0692000					HORVU3Hr1G064320	1.81		sen+					Zm00001d043795	2.03		sen+	1	28566638	28567684	Similar to Glutathione S-transferase GSTU6
Os01g0692100																	1	28568839	28569792	Glutathione S-transferase C-terminal-like domain containing protein
Os01g0692300													Zm00001d043786	-2.13		sen-	1	28573135	28575675	Protein of unknown function DUF827 plant domain containing protein
Os01g0692600	BRADI_2g47140v3	0.72		sen+													1	28578167	28582863	Uncharacterised conserved protein UCP031088 alpha/beta hydrolase At1g15070 domain containing protein
Os01g0692700	BRADI_2g17591v3	-0.9		sen-													1	28583152	28586500	Similar to Protein binding protein
Os01g0693300									Os01g0693300	-1.22		sen-					1	28605063	28608212	Similar to Lipid phosphate phosphatase 2 (EC 3.1.3.-) (AtLPP2) (Phosphatidic acid phosphatase 2) (AtPAP2) (Prenyl diphosphate phosphatase)
Os01g0693400									Os01g0693400	-1.22	-0.67		Zm00001d043782		0.61	tol+	1	28619585	28621117	Pathogenesis-related transcriptional factor and ERF DNA-binding domain containing protein
Os01g0693800	BRADI_2g47240v3	-0.85		sen-													1	28654048	28655948	Similar to Threonine synthase chloroplast precursor (EC 4.2.3.1) (TS)
Os01g0693900	BRADI_2g47250v3	-0.58		sen-													1	28657603	28660499	Peptidyl-tRNA hydrolase family protein
Os01g0694000									Os01g0694000	-2.45	-1.45						1	28666309	28668105	Protein kinase core domain containing protein
Os01g0694100																	1	28669652	28673566	Leucine-rich repeat domain containing protein
Os01g0695100									Os01g0695100	-0.74	-0.6						1	28739988	28744712	Similar to Phosphoethanolamine N-methyltransferase
Os01g0695200	BRADI_2g47300v3	1.01		sen+									Zm00001d043768	1.06		sen+	1	28746556	28751345	Protein of unknown function DUF266 plant family protein
Os01g0695300	BRADI_2g47310v3	-0.93		sen-					Os01g0695300		0.53	tol+					1	28752172	28755024	Similar to Farnesyl pyrophosphate synthetase (FPP synthetase) (FPS) (Farnesyl diphosphate synthetase) [Includes: Dimethylallyltranstransferase (EC 2.5.1.1)%3B Geranyltranstransferase (EC 2.5.1.10)]
Os01g0695600													Zm00001d043767	-1.33		sen-	1	28756464	28759291	Pyridoxal phosphate-dependent enzyme beta subunit domain containing protein
Os01g0695700					HORVU3Hr1G065240		0.88	tol+	Os01g0695700	-0.45		sen-					1	28768976	28780102	Similar to MDR-like ABC transporter
Os01g0695800									Os01g0695800	-2.27	-0.78	ΔLFC>1					1	28786544	28787701	Similar to MDR-like ABC transporter
Os01g0696000													Zm00001d043764	-0.82		sen-	1	28798880	28803859	Similar to Calcium-activated outward-rectifying potassium channel 1 (AtKCO1)
Os01g0696100	BRADI_2g47387v3	-1.76		sen-													1	28801026	28802680	Similar to outward rectifying potassium channel
Os01g0697100	BRADI_2g47430v3	-0.72		sen-	HORVU2Hr1G028580		-2.64	tol-					Zm00001d011649		-1.17	tol-	1	28847995	28849719	UDP-glucuronosyl/UDP-glucosyltransferase family protein
Os01g0698000									Os01g0698000	0.56		sen+	Zm00001d011650		-0.56	tol-	1	28881515	28882954	Conserved hypothetical protein
Os01g0698100	BRADI_2g47450v3	0.54		sen+													1	28885452	28890777	SWAP/Surp domain containing protein
Os01g0698300																	1	28892894	28897236	Zinc finger BED-type predicted domain containing protein
Os01g0699100																	1	28921498	28922922	Serine/threonine protein kinase domain containing protein
Os01g0699400													Zm00001d011655	1.78		sen+	1	28933836	28935191	Serine/threonine protein kinase domain containing protein
Os01g0699500													Zm00001d011656	4.93		sen+	1	28939657	28941009	Serine/threonine protein kinase domain containing protein
Os01g0699900													Zm00001d011657	-1.82		sen-	1	28955683	28957013	Similar to Plasma membrane associated protein-like
Os01g0700000									Os01g0700000	0.66	1.1						1	28970632	28974459	Conserved hypothetical protein
Os01g0700100	BRADI_2g47540v3	-1.66		sen-					Os01g0700100	1.07	1.98						1	28975565	28977344	MtN3 and saliva related transmembrane protein family protein
Os01g0701700													Zm00001d043734	2.25		sen+	1	29050777	29053445	SAM dependent carboxyl methyltransferase family protein
Os01g0701900	BRADI_2g47560v3	0.57		sen+					Os01g0701900	0.64		sen+					1	29067275	29072196	Similar to Phosphatidylinositol transfer-like protein III
Os01g0702000									Os01g0702000		-1.04	tol-					1	29072787	29076338	Protein of unknown function DUF151 domain containing protein
Os01g0702500																	1	29123535	29124590	Similar to Dehydrin Rab25
Os01g0703400	BRADI_2g47610v3	-1.4		sen-					Os01g0703400		0.85	tol+	Zm00001d011673	-3.17		sen-	1	29158306	29162547	Similar to Farnesyl pyrophosphate synthetase (FPP synthetase) (FPS) (Farnesyl diphosphate synthetase) [Includes: Dimethylallyltranstransferase (EC 2.5.1.1)%3B Geranyltranstransferase (EC 2.5.1.10)]
Os01g0703600													Zm00001d043726	1.07		sen+	1	29166421	29170361	Clathrin-associated adaptor protein complex 1 medium subunit mu1 (AP1M1) Regulation of vesicular trafficking Disease resistanc
Os01g0704100									Os01g0704100	0.94	2.48	ΔLFC>1	Zm00001d011679		1.37	tol+	1	29188850	29190936	Nitrate transporter Nitrate transpor
Os01g0704200													Zm00001d043724	-1.28		sen-	1	29191992	29194734	Similar to predicted protein
Os01g0704300									Os01g0704300	-0.72	-0.83						1	29202204	29203802	Conserved hypothetical protein
Os01g0704400									Os01g0704400	-0.6		sen-					1	29206326	29209606	Conserved hypothetical protein
Os01g0704700	BRADI_2g47670v3	-0.6		sen-									Zm00001d043721	-1.01		sen-	1	29216948	29221583	Similar to Chloride channel protein CLC-f (AtCLC-f). Splice isoform 2
Os01g0705200																	1	29233040	29234256	Late embryogenesis abundant protein repeat containing protein
Os01g0705300	BRADI_2g47720v3	-1.13		sen-									Zm00001d043707	-2.25		sen-	1	29240068	29246825	Similar to PDE225/PTAC7
Os01g0705700	BRADI_2g47730v3	1.61		sen+													1	29271158	29273175	Similar to Transcription factor ICE1 (Inducer of CBF expression 1) (Basic helix- loop-helix protein 116) (bHLH116) (AtbHLH116)
Os01g0706000	BRADI_2g47740v3	0.61		sen+					Os01g0706000	0.64		sen+					1	29280126	29282898	Similar to RNA polymerase II transcriptional coactivator KELP
Os01g0706400					HORVU3Hr1G066420		-0.47	tol-	Os01g0706400	-0.53		sen-					1	29306448	29312511	Protein of unknown function DUF292 eukaryotic domain containing protein
Os01g0706500	BRADI_2g47760v3	0.86		sen+	HORVU3Hr1G066430	0.9		sen+									1	29314194	29316850	Ribosomal protein L28e domain containing protein
Os01g0706600	BRADI_2g47770v3	3.44		sen+													1	29317540	29318156	Conserved hypothetical protein
Os01g0706700									Os01g0706700		1.46	tol+	Zm00001d009641	-1.41		sen-	1	29318195	29322559	Protein of unknown function DUF590 family protein
Os01g0706900	BRADI_2g47790v3	-2.42		sen-									Zm00001d043701		-1.05	tol-	1	29327583	29334792	Similar to Auxin amidohydrolase
Os01g0708400									Os01g0708400	-0.78		sen-					1	29436121	29436450	Non-protein coding transcript
Os01g0708500	BRADI_2g47860v3		-0.6	tol-													1	29437301	29439863	Similar to lysine decarboxylase-like protein
Os01g0708900									Os01g0708900	-0.65	-1.03						1	29458644	29462865	Mitochondrial substrate carrier family protein
Os01g0709500	BRADI_2g47920v3	-0.89		sen-	HORVU3Hr1G066880	0.91	0.94										1	29483251	29492536	Conserved hypothetical protein
Os01g0710000	BRADI_2g47940v3	0.54		sen+													1	29501122	29506948	Similar to WD-repeat protein RBAP1
Os01g0710200	BRADI_2g47960v3	2.02		sen+													1	29513380	29514941	Polyamine oxidase Polyamine catabolis
Os01g0710700	BRADI_2g47970v3	-0.82		sen-	HORVU3Hr1G066960		-0.8	tol-	Os01g0710700		-0.91	tol-					1	29529874	29532765	Lipase class 3 family protein
Os01g0711200									Os01g0711200	1.13	0.61						1	29551666	29553996	Tyrosine protein kinase domain containing protein
Os01g0711400									Os01g0711400		0.47	tol+					1	29563666	29566585	Similar to Victorin binding protein
Os01g0711500									Os01g0711500		0.92	tol+					1	29568500	29572068	Calcineurin B-like protein Calcium sensor Flooding response during seed germinatio
Os01g0712600	BRADI_2g48030v3	0.86	0.89										Zm00001d011709	-1.35		sen-	1	29599004	29601061	Similar to methyltransferase
Os01g0713200	BRADI_2g60441v3	-2.07		sen-	HORVU3Hr1G105300		-3.7	tol-	Os01g0713200	-2.63	-1.96						1	29620958	29622314	Similar to Beta-glucanase
Os01g0713900																	1	29670703	29675358	Similar to Myosin
Os01g0714600									Os01g0714600	-2.3	-1.82						1	29708354	29709366	Similar to cDNA clone:J023088C01 full insert sequence
Os01g0714900	BRADI_2g48120v3	-1		sen-													1	29730171	29735065	Similar to RAB7A
Os01g0715400	BRADI_2g48150v3	-0.98		sen-					Os01g0715400	0.59		sen+					1	29760770	29770021	Hypothetical conserved gene
Os01g0716200													Zm00001d043655	-1.43		sen-	1	29801081	29806870	IQ calmodulin-binding region domain containing protein
Os01g0716400									Os01g0716400	0.83	0.57		Zm00001d011720	0.84		sen+	1	29816823	29819737	Violaxanthin de-epoxidase family protein
Os01g0716500					HORVU3Hr1G067760		-1.65	tol-									1	29820731	29821898	Methyltransferase type 12 domain containing protein
Os01g0716800	BRADI_2g48250v3	-0.78		sen-													1	29830265	29836090	Endonuclease/exonuclease/phosphatase domain containing protein
Os01g0717000									Os01g0717000	-0.8	-0.44		Zm00001d043652	2.49		sen+	1	29842914	29846824	Similar to GmCK1p (EC 2.7.1.32)
Os01g0717400	BRADI_2g48267v3	-2.22	0.76	sen-/tol+					Os01g0717400	-0.53	-0.62		Zm00001d043650		0.68	tol+	1	29874486	29877459	EGF-like alliinase domain containing protein
Os01g0718300													Zm00001d011721	-2.12		sen-	1	29927587	29931452	Receptor serine/threonine kinase Organ development through controlling cell division and elongatio
Os01g0718700													Zm00001d018924	-2.37		sen-	1	29944091	29948109	Similar to predicted protein
Os01g0719000					HORVU3Hr1G068120		-1.75	tol-									1	29960694	29963065	Protein of unknown function DUF581 family protein
Os01g0719100									Os01g0719100	0.55		sen+					1	29965312	29970765	Similar to RING finger and CHY zinc finger domain-containing protein 1
Os01g0719300													Zm00001d043614		-0.53	tol-	1	29987911	29994075	Similar to Sulfate transporter 3.1 (AST12) (AtST1)
Os01g0719400					HORVU3Hr1G068170		1.47	tol+									1	29995196	29999996	CASC3/Barentsz eIF4AIII binding domain containing protein
Os01g0719600					HORVU3Hr1G068200	-1.41	-0.98										1	30003535	30005888	Heavy metal transport/detoxification protein domain containing protein
Os01g0719700									Os01g0719700	0.77	0.73						1	30011021	30011903	Similar to HCF101 (HIGH-CHLOROPHYLL-FLUORESCENCE 101)%3B ATP binding
Os01g0719800									Os01g0719800	0.62	0.72						1	30010144	30015371	Hypothetical protein
Os01g0720400									Os01g0720400	1.32	0.67		Zm00001d011734		-2.86	tol-	1	30025366	30026465	HAD-superfamily subfamily IB hydrolase hypothetical 1 protein
Os01g0720500									Os01g0720500	-0.53	-2.29	ΔLFC<-1					1	30030998	30032054	Similar to Type I chlorophyll a/b-binding protein b (Fragment)
Os01g0720700									Os01g0720700	1.23		sen+					1	30043446	30043783	Similar to satase isoform I
Os01g0721000									Os01g0721000	0.92		sen+					1	30059264	30060869	NB-ARC domain containing protein
Os01g0721400									Os01g0721400	1		sen+					1	30079674	30081481	NB-ARC domain containing protein
Os01g0721900	BRADI_2g48500v3	0.88		sen+									Zm00001d043625	-0.74		sen-	1	30095422	30098794	Similar to Nuclear RNA binding protein B (Fragment)
Os01g0722700					HORVU3Hr1G068620		-0.99	tol-									1	30131389	30135248	Similar to Hexokinase
Os01g0723100	BRADI_2g48557v3	-1.57		sen-									Zm00001d011740	-0.82		sen-	1	30155680	30157642	Senescence-associated family protein
Os01g0723200													Zm00001d011741	-0.78		sen-	1	30157961	30159769	Similar to 40S ribosomal protein S19-like
Os01g0723400	BRADI_2g48570v3	0.94		sen+	HORVU3Hr1G068600		0.83	tol+	Os01g0723400	-0.6	-0.66						1	30166017	30171659	NADP-malic enzyme Splicing varian
Os01g0723600					HORVU3Hr1G068700	1.99		sen+					Zm00001d043600	0.85		sen+	1	30180581	30184467	Ribose-phosphate pyrophosphokinase 3 (EC 2.7.6.1) (Phosphoribosyl pyrophosphate synthetase 3)
Os01g0723800	BRADI_2g48610v3	-1.21		sen-													1	30189384	30195340	Similar to P-glycoprotein homologue
Os01g0724400													Zm00001d019960		1.47	tol+	1	30214131	30214879	Similar to Pleiotropic drug resistance protein 15
Os01g0725600																	1	30251471	30254956	Regulator of chromosome condensation RCC1 domain containing protein
Os01g0725800	BRADI_2g48657v3	-1.26		sen-					Os01g0725800	0.7	0.66		Zm00001d011746	-2.16		sen-	1	30257752	30263365	WD40/YVTN repeat-like domain containing protein
Os01g0726400																	1	30278399	30280577	MADS box transcription factor Regulation of floral organ identit
Os01g0726801									Os01g0726801		-1.87	tol-					1	30298621	30299053	Non-protein coding transcript
Os01g0727100	BRADI_2g48710v3	-2.89		sen-									Zm00001d043587	-1.15		sen-	1	30311446	30315773	Glycosyl transferase family 8 protein
Os01g0727500	BRADI_2g48730v3	2.91		sen+													1	30322749	30325083	Protein of unknown function DUF584 family protein
Os01g0727600	BRADI_2g48735v3	3.88		sen+													1	30340015	30340752	Conserved hypothetical protein
Os01g0727700													Zm00001d011752	4.35		sen+	1	30341265	30341594	Hypothetical conserved gene
Os01g0727800	BRADI_2g48740v3	-0.83		sen-													1	30344172	30345745	Peptidase S8 subtilisin-related domain containing protein
Os01g0727820									Os01g0727820	-1.91	-2.03						1	30344327	30346491	Hypothetical protein
Os01g0728100	BRADI_2g48760v3	4.67		sen+													1	30361864	30364101	Lipase GDSL domain containing protein
Os01g0728150													Zm00001d011753	2.26		sen+	1	30364320	30365422	Similar to HVA22F (HVA22-LIKE PROTEIN F)
Os01g0728200	BRADI_2g48780v3	-0.95		sen-													1	30366118	30367630	Conserved hypothetical protein
Os01g0728700	BRADI_2g48790v3	9.04		sen+													1	30386907	30387873	Protein of unknown function DUF1264 family protein
Os01g0729100													Zm00001d011756	1.18		sen+	1	30398989	30405483	Protein of unknown function DUF92 transmembrane family protein
Os01g0729900									Os01g0729900	-1.08		sen-					1	30427122	30431744	Conserved hypothetical protein
Os01g0730200	BRADI_2g48880v3	1.15		sen+													1	30453353	30455330	F-box domain cyclin-like domain containing protein
Os01g0730500													Zm00001d011760	-1.25		sen-	1	30472593	30475205	Similar to Ferredoxin (Bacterial type ferredoxin family)
Os01g0730700																	1	30480114	30481849	WRKY transcription factor 14 (WRKY14)
Os01g0730800	BRADI_2g48920v3	-1.13		sen-									Zm00001d011761	-1.61		sen-	1	30488192	30490382	Mpv17/PMP22 family protein
Os01g0731600	BRADI_2g48940v3	-1.64		sen-													1	30520488	30521565	Similar to pathogen-related protein
Os01g0732200	BRADI_2g48960v3	-1.1		sen-					Os01g0732200	-0.46	-0.62						1	30537136	30541871	GTP-binding protein HSR1-related domain containing protein
Os01g0732700													Zm00001d011764	-1.58		sen-	1	30561150	30564436	Flavin monooxygenase-like enzyme Auxin biosynthesi
Os01g0733200	BRADI_2g48990v3	0.81		sen+	HORVU3Hr1G069590	1.23		sen+									1	30582485	30583694	Similar to Heat shock transcription factor 29 (Fragment)
Os01g0733500	BRADI_2g49000v3	2.59		sen+	HORVU3Hr1G069650	2.94		sen+	Os01g0733500	1.21		sen+	Zm00001d043538	-1.7		sen-	1	30589859	30592513	Similar to Dehydration-induced protein RD22-like protein 1
Os01g0734200	BRADI_2g49040v3	0.74		sen+									Zm00001d043543	-1.11		sen-	1	30622077	30623763	Similar to respiratory burst oxidase protein B
Os01g0734466									Os01g0734466		1.18	tol+					1	30630841	30634318	Similar to NAD(P)H oxidase (Fragment)
Os01g0734600	BRADI_2g49057v3	-1.91		sen-													1	30647512	30649342	UDP-glucuronosyl/UDP-glucosyltransferase family protein
Os01g0734800					HORVU1Hr1G092650		-4.26	tol-	Os01g0734800	-0.95		sen-	Zm00001d043544	1.71		sen+	1	30655306	30657083	UDP-glucuronosyl/UDP-glucosyltransferase family protein
Os01g0735300	BRADI_2g49120v3	-0.93		sen-	HORVU5Hr1G110440		-3.82	tol-									1	30666642	30668299	UDP-glucuronosyl/UDP-glucosyltransferase family protein
Os01g0735900	BRADI_2g49110v3	-2.62		sen-									Zm00001d012782	2.44		sen+	1	30689850	30691452	UDP-glucuronosyl/UDP-glucosyltransferase family protein
Os01g0736400									Os01g0736400	-1.23		sen-					1	30712401	30717687	Similar to 8-amino-7-oxononanoate synthase
Os01g0736600	BRADI_2g49152v3	-0.97		sen-													1	30730320	30731337	Zinc finger RING/FYVE/PHD-type domain containing protein
Os01g0736900	BRADI_2g49160v3	2.25		sen+													1	30738700	30740720	Reticulon family protein
Os01g0738000													Zm00001d043558	-1.37		sen-	1	30786190	30787966	Conserved hypothetical protein
Os01g0739200									Os01g0739200	0.55		sen+	Zm00001d043527		-0.99	tol-	1	30868528	30871602	Protein-tyrosine phosphatase dual specificity domain containing protein
Os01g0739400	BRADI_2g49310v3	-1.77		sen-					Os01g0739400		-0.56	tol-					1	30879000	30885267	Similar to predicted protein
Os01g0739500	BRADI_2g49320v3	-1.58		sen-					Os01g0739500	-1.08	-1.24						1	30885172	30886338	Conserved hypothetical protein
Os01g0739700	BRADI_2g49330v3	-3.61		sen-									Zm00001d043524	-2.68		sen-	1	30897747	30901040	Glycoside hydrolase family 17 protein
Os01g0740300									Os01g0740300	-1.64	-0.78						1	30909430	30916476	Hypothetical protein
Os01g0740400													Zm00001d043520	-3.33		sen-	1	30919728	30921193	Protein of unknown function DUF1005 family protein
Os01g0740500	BRADI_2g49380v3	-1.33		sen-													1	30923013	30927457	Similar to glutamate carboxypeptidase 2
Os01g0740600									Os01g0740600		0.7	tol+					1	30933396	30933963	Transferrin receptor-like dimerisation domain containing protein
Os01g0740650	BRADI_2g49387v3	2.48		sen+													1	30933009	30936727	Similar to glutamate carboxypeptidase 2
Os01g0741200													Zm00001d043516	-2.03		sen-	1	30949379	30952405	Similar to LysM type receptor kinase (Fragment)
Os01g0741900	BRADI_2g49420v3	-0.89		sen-	HORVU3Hr1G070620		-1	tol-					Zm00001d043515	0.84		sen+	1	30975765	30979337	Auxin-responsive protein Drought tolerance Control of tiller outgrowt
Os01g0742000					HORVU3Hr1G070610	1.31		sen+					Zm00001d012771	-1.83		sen-	1	30984522	30985146	tRNA/rRNA methyltransferase SpoU domain containing protein
Os01g0742400					HORVU3Hr1G070700		-3.1	tol-	Os01g0742400	-2.76	-1.55	ΔLFC>1					1	31006026	31009770	Hypothetical conserved gene
Os01g0742500	BRADI_2g49460v3		0.62	tol+	HORVU3Hr1G070690	0.87	0.6										1	31009626	31013954	Similar to Hexokinase
Os01g0743100	BRADI_2g49490v3	-2.52		sen-													1	31047493	31049443	IQ motif EF-hand binding site domain containing protein
Os01g0743300													Zm00001d012765	-1.5		sen-	1	31065153	31069986	Protease-associated PA domain containing protein
Os01g0743400									Os01g0743400		-0.51	tol-	Zm00001d043508	-1.42		sen-	1	31070183	31076275	Similar to Tryptophanyl-tRNA synthetase (Fragment)
Os01g0743500	BRADI_2g49540v3	10.35		sen+	HORVU3Hr1G070850	2.74	2.78						Zm00001d012764	10.36		sen+	1	31076571	31081251	Cytosolic NADP malic enzyme
Os01g0743800	BRADI_2g49560v3	0.71		sen+									Zm00001d043505	-6.11	1.21	sen-/tol+	1	31093047	31094953	Similar to histidine-containing phosphotransfer protein 4
Os01g0744000																	1	31099412	31106801	Similar to Kinesin heavy chain (Fragment)
Os01g0746200					HORVU3Hr1G071090	0.64		sen+									1	31203445	31211272	Nucleoporin Common symbiosis signaling (SYM) pathwa
Os01g0746400					HORVU3Hr1G071170		-1.32	tol-	Os01g0746400	0.93		sen+					1	31225458	31228566	Carotenoid cleavage dioxygenase 8 Control of lateral bud outgrowth Regulation of tillering Strigolactones biosynthesi
Os01g0747300									Os01g0747300		-0.72	tol-					1	31272337	31274375	Similar to Plant-specific domain TIGR01615 family protein
Os01g0747400									Os01g0747400	-0.86		sen-	Zm00001d032310	2.04		sen+	1	31275242	31279385	Protein kinase core domain containing protein
Os01g0747500									Os01g0747500		-1.08	tol-					1	31283686	31286692	Similar to Dihydroorotase (EC 3.5.2.3)
Os01g0747700													Zm00001d043449	-1.52		sen-	1	31288175	31292795	RNA-binding S4 domain containing protein
Os01g0747800																	1	31299014	31300157	VQ domain containing protein
Os01g0748600	BRADI_2g49790v3	-0.71		sen-													1	31333328	31337096	Similar to Protein kinase family protein
Os01g0748800									Os01g0748800	-1.66		sen-					1	31343694	31345522	Similar to ZCN12
Os01g0748900									Os01g0748900	-0.67		sen-					1	31349612	31353150	Membrane attack complex component/perforin/complement C9 family protein
Os01g0749100													Zm00001d043465	-2.35		sen-	1	31362655	31365485	Protein of unknown function DUF616 family protein
Os01g0749200	BRADI_2g49850v3	-1.9		sen-					Os01g0749200		-0.41	tol-					1	31367052	31369399	Chloroplast ribosome L13 protein Chloroplast development under low temperature condition
Os01g0749400	BRADI_2g49870v3	-2.56		sen-					Os01g0749400	-0.92	-0.51						1	31373447	31377544	HAD-superfamily hydrolase subfamily IIB protein
Os01g0749900	BRADI_2g49890v3	0.72		sen+					Os01g0749900	-0.54		sen-					1	31394913	31400069	Protein of unknown function DUF250 domain containing protein
Os01g0750100																	1	31409132	31410736	Similar to WRKY transcription factor-like (WRKY transcription factor 13) (WRKY13)
Os01g0750300													Zm00001d043477		-5.45	tol-	1	31422946	31428670	Similar to Cellulose synthase (Fragment)
Os01g0750500	BRADI_2g49930v3		1.26	tol+													1	31453335	31457548	Protein of unknown function DUF814 domain containing protein
Os01g0750600													Zm00001d043480	1.48		sen+	1	31473999	31477461	Protein kinase-like domain containing protein
Os01g0751600									Os01g0751600	1.22		sen+					1	31524164	31527114	Class III lipase Regulation of tillering plant height and spikelet fertilit
Os01g0752200									Os01g0752200	-0.53		sen-					1	31552902	31556837	Enoyl-CoA hydratase/isomerase Regulation of grain number and the yiel
Os01g0752300	BRADI_2g50020v3	0.87		sen+													1	31559233	31560836	Similar to 60S ribosomal protein L18a-1
Os01g0752500													Zm00001d043491	1.58		sen+	1	31567786	31568709	APETELA2/ethylene response factor (AP2/ERF) type transcription factor Negative regulation of disease resistance Negative regulation of salt toleranc
Os01g0752700					HORVU3Hr1G072230	0.68		sen+									1	31575708	31583476	Similar to GTP-binding protein
Os01g0753000																	1	31592127	31596970	Similar to VOZ transcription factor
Os01g0753100													Zm00001d043432	-0.7		sen-	1	31599199	31604576	Alcohol dehydrogenase superfamily zinc-containing protein
Os01g0753200	BRADI_2g50100v3	-0.59		sen-													1	31608109	31609696	Similar to DNA binding protein
Os01g0753500	BRADI_2g50120v3	-1.58		sen-									Zm00001d012731	-1.34		sen-	1	31617190	31623205	Transcriptional factor B3 family protein
Os01g0753800																	1	31629372	31630731	Conserved hypothetical protein
Os01g0754000	BRADI_2g50130v3	0.88		sen+									Zm00001d012729	-1.19		sen-	1	31635593	31637775	Conserved hypothetical protein
Os01g0754100									Os01g0754100		-0.67	tol-					1	31638589	31640361	Nucleic acid-binding OB-fold domain containing protein
Os01g0754200													Zm00001d043428	-1.44		sen-	1	31641231	31648357	Glycosyl transferase family 48 protein
Os01g0755100					HORVU3Hr1G072640		0.53	tol+									1	31678312	31689878	Conserved hypothetical protein
Os01g0755500					HORVU3Hr1G072670		-1.66	tol-					Zm00001d012725	-1.68		sen-	1	31699518	31701126	Plant-specific transcription factor miR319 target gen
Os01g0755700									Os01g0755700		-1.45	tol-	Zm00001d012720	-1.89		sen-	1	31710636	31711784	Zinc finger RING/FYVE/PHD-type domain containing protein
Os01g0756200													Zm00001d012719	-3.07		sen-	1	31728015	31730360	Similar to VirE2-interacting protein VIP1
Os01g0756400	BRADI_2g50237v3	0.74		sen+													1	31738060	31739670	Conserved hypothetical protein
Os01g0756700																	1	31761223	31763887	Shaker potassium channel Salinity stress tolerance Ion homeostasi
Os01g0757500	BRADI_2g50300v3	1.2		sen+					Os01g0757500	1.34		sen+					1	31811367	31814552	CS domain domain containing protein
Os01g0757700													Zm00001d012708	-1.78		sen-	1	31826639	31830179	Similar to EMB1417
Os01g0757800									Os01g0757800	-0.53		sen-					1	31830303	31836694	DNA polymerase eta domain containing protein
Os01g0758300													Zm00001d012702	1.58		sen+	1	31859333	31865031	Similar to Phosphoenolpyruvate carboxylase housekeeping isozyme (EC 4.1.1.31) (PEPCase)
Os01g0758400	BRADI_2g50390v3	-0.78		sen-													1	31870933	31877607	Similar to Phosphatidate cytidylyltransferase
Os01g0759400																	1	31943529	31948580	OsPK7
Os01g0759900					HORVU3Hr1G073180		-2.64	tol-									1	31976840	31980051	Similar to Permease 1
Os01g0760300																	1	31986501	31989198	Similar to Pollen-specific kinase partner protein
Os01g0760400	BRADI_2g50590v3	0.63		sen+													1	31992093	31996447	Toll-Interleukin receptor domain containing protein
Os01g0760600													Zm00001d043382	2.22		sen+	1	31998877	32003690	Aspartate aminotransferase cytoplasmic (EC 2.6.1.1) (Transaminase A)
Os01g0760900	BRADI_2g50520v3	-1.4		sen-	HORVU3Hr1G073240		-2.16	tol-	Os01g0760900	1.47		sen+					1	32010478	32013222	Conserved hypothetical protein
Os01g0761000	BRADI_2g50526v3	-2.06		sen-									Zm00001d012689	-0.79		sen-	1	32014488	32016245	Conserved hypothetical protein
Os01g0761100					HORVU3Hr1G073470		-0.65	tol-									1	32016706	32022401	Tesmin/TSO1-like CXC domain containing protein
Os01g0761300	BRADI_2g50557v3	0.55		sen+													1	32028817	32035337	Similar to Long-chain-fatty-acid-CoA ligase-like protein
Os01g0761400																	1	32032727	32035011	TGF-beta receptor type I/II extracellular region family protein
Os01g0761500	BRADI_2g50580v3	-3.08		sen-													1	32038024	32040378	TGF-beta receptor type I/II extracellular region family protein
Os01g0762000													Zm00001d012687	1.75		sen+	1	32057400	32062829	ARF/SAR superfamily domain containing protein
Os01g0762300	BRADI_2g50620v3	-1.84		sen-					Os01g0762300	0.61		sen+	Zm00001d012686	-1.5	0.82	sen-/tol+	1	32070785	32072008	Similar to predicted protein
Os01g0762900													Zm00001d012684	-1.77		sen-	1	32088269	32089040	Similar to UPA24
Os01g0763000	BRADI_2g50670v3	1.04		sen+													1	32091719	32094141	Protein of unknown function DUF2039 domain containing protein
Os01g0763200	BRADI_2g50687v3	-0.87		sen-					Os01g0763200	-0.94		sen-					1	32106876	32109742	TCP family transcription factor Strigolactone and cytokinin controlled mesocotyl elongation in darknes
Os01g0763600									Os01g0763600	0.5		sen+					1	32130603	32136991	PLC-like phosphodiesterase TIM beta/alpha-barrel domain domain containing protein
Os01g0763700									Os01g0763700		-0.51	tol-					1	32137366	32139052	Similar to CRR7 (CHLORORESPIRATORY REDUCTION 7)
Os01g0763750									Os01g0763750	-0.83		sen-					1	32140069	32143430	Exo70 exocyst complex subunit family protein
Os01g0763900	BRADI_2g50750v3	1.29		sen+									Zm00001d043361	-3.41		sen-	1	32145847	32147094	X8 domain containing protein
Os01g0764400																	1	32171834	32174870	Similar to Chorismate mutase chloroplast precursor (EC 5.4.99.5) (CM-1)
Os01g0764700	BRADI_2g50830v3	-0.87		sen-													1	32189932	32193266	Resolvase holliday junction-type YqgF-like domain containing protein
Os01g0764800									Os01g0764800	1.72		sen+	Zm00001d043350	5.72		sen+	1	32221378	32225121	Indole-3-acetic acid (IAA)-amido synthetase Disease resistance Abiotic stress toleranc
Os01g0764900													Zm00001d043348	-1.04		sen-	1	32226157	32229661	Similar to Formamidase
Os01g0764950					HORVU3Hr1G074250	-0.97	-1.27										1	32230712	32232641	Pentatricopeptide repeat domain containing protein
Os01g0765500	BRADI_2g50910v3	5.87		sen+													1	32252128	32255022	Conserved hypothetical protein
Os01g0766200													Zm00001d012664	0.97		sen+	1	32276583	32278225	Similar to RING finger protein 5
Os01g0766300	BRADI_2g50950v3	1.23		sen+									Zm00001d043338	2.45		sen+	1	32289147	32289742	Conserved hypothetical protein
Os01g0766900	BRADI_2g50967v3	-1.22		sen-	HORVU3Hr1G074570		-1.11	tol-	Os01g0766900	0.9		sen+					1	32318616	32319527	Hypothetical protein
Os01g0767600	BRADI_2g51010v3	-1.07		sen-					Os01g0767600	0.8		sen+	Zm00001d012662	1.13		sen+	1	32346889	32350070	Conserved hypothetical protein
Os01g0767900	BRADI_2g51030v3	-0.76		sen-	HORVU3Hr1G074640		-0.43	tol-									1	32367736	32371643	Similar to Ankyrin repeat BTB/POZ domain-containing protein
Os01g0768100					HORVU2Hr1G118500		-1.13	tol-									1	32379784	32380582	Conserved hypothetical protein
Os01g0768200																	1	32381348	32385675	TRAM LAG1 and CLN8 homology domain containing protein
Os01g0769000	BRADI_2g51080v3	0.63		sen+													1	32433121	32439546	Topoisomerase II-associated protein PAT1 domain containing protein
Os01g0769200													Zm00001d043327	-1.42		sen-	1	32450917	32456504	Peptidase S8 subtilisin-related domain containing protein
Os01g0769700																	1	32461878	32465053	Receptor-like kinase Control of reproductive growth and development Repression of cell deat
Os01g0769900													Zm00001d043325	-1.91		sen-	1	32470279	32476597	Similar to PTAC12 (PLASTID TRANSCRIPTIONALLY ACTIVE12)
Os01g0770000									Os01g0770000	0.49		sen+					1	32475144	32479146	Uncharacterised protein family UPF0089 domain containing protein
Os01g0770100	BRADI_2g51150v3	1.45		sen+													1	32484736	32489971	O-acyltransferase WSD1 N-terminal domain containing protein
Os01g0770400																	1	32508406	32511902	Cyclin-like F-box domain containing protein
Os01g0770700									Os01g0770700	-0.63	-1.4						1	32523314	32523953	Similar to Copper transporter 1
Os01g0770800	BRADI_2g51210v3	-1.72		sen-													1	32526290	32526923	Ctr copper transporter family protein
Os01g0771000	BRADI_2g51221v3	-1.41		sen-	HORVU3Hr1G075150		-3.5	tol-									1	32534857	32535912	Protein of unknown function DUF567 family protein
Os01g0771100	BRADI_2g51230v3	1.43		sen+													1	32538907	32541617	Mitochondrial glycoprotein family protein
Os01g0771200	BRADI_2g51240v3	0.82		sen+					Os01g0771200	1.01		sen+					1	32543304	32545191	Similar to Mal d 1-associated protein
Os01g0771400																	1	32553344	32569462	Similar to CM0545.290.nc protein
Os01g0772150																	1	32594937	32597265	Similar to histone-lysine N-methyltransferase SUVR3
Os01g0772400	BRADI_2g51350v3	1.22		sen+									Zm00001d012647	1		sen+	1	32608386	32611306	Streptomyces cyclase/dehydrase family protein
Os01g0772800	BRADI_2g51400v3	-2.27		sen-													1	32652482	32656533	Similar to Signal recognition particle 54 kDa protein 2 (SRP54)
Os01g0773100									Os01g0773100	-0.64		sen-					1	32669542	32676082	Similar to F20D22.3 protein
Os01g0773200									Os01g0773200	0.54		sen+					1	32676081	32681407	Hypothetical conserved gene
Os01g0773700	BRADI_2g51480v3	-2.51		sen-					Os01g0773700		-0.68	tol-	Zm00001d043299	-1.49		sen-	1	32708550	32709283	Similar to Photosystem II reaction center W protein (PSII 6.1 kDa protein) (Fragment)
Os01g0775100	BRADI_2g51500v3	-1.68		sen-					Os01g0775100	0.62	0.88						1	32759157	32764753	Plus-3 domain containing protein
Os01g0775400					HORVU3Hr1G075920		-1.91	tol-									1	32788488	32792747	Similar to Cytokinin dehydrogenase 5 precursor (EC 1.5.99.12) (Cytokinin oxidase 5) (CKO5) (AtCKX5) (AtCKX6)
Os01g0776400	BRADI_2g51580v3	1.05		sen+													1	32838525	32842473	Similar to predicted protein
Os01g0776700	BRADI_2g51610v3	-0.98		sen-									Zm00001d043289	1.32		sen+	1	32855435	32858097	Similar to predicted protein
Os01g0777000																	1	32869293	32874316	Vacuolar protein sorting-associated protein 51 domain containing protein
Os01g0777200	BRADI_2g51630v3	-0.56		sen-													1	32886869	32892451	Peptidase aspartic catalytic domain containing protein
Os01g0777800	BRADI_2g51670v3	-1.28		sen-													1	32929073	32932792	Hypothetical conserved gene
Os01g0777900									Os01g0777900		1.43	tol+					1	32934209	32934997	Non-protein coding transcript
Os01g0778700													Zm00001d043275	0.88		sen+	1	32956995	32963290	Similar to Transmembrane protein 49
Os01g0778800									Os01g0778800	-1.83	-0.8	ΔLFC>1					1	32965371	32976817	Peptidase M16 core domain containing protein
Os01g0779100									Os01g0779100		-1.63	tol-					1	32985048	32994371	Peptidase M16 zinc-binding site domain containing protein
Os01g0779201	BRADI_2g51716v3	-2.48		sen-													1	32994691	32994921	Hypothetical conserved gene
Os01g0780500	BRADI_2g51770v3	0.69		sen+													1	33059198	33064709	SCAMP family protein
Os01g0780900									Os01g0780900	0.92	0.7						1	33082114	33083394	Hypothetical conserved gene
Os01g0781000																	1	33089210	33090179	Vacuolar protein sorting-associated VPS28 family protein
Os01g0781700																	1	33120499	33124371	Similar to Blast resistance protein Pi37
Os01g0782200					HORVU3Hr1G076890		-0.65	tol-	Os01g0782200	-0.48		sen-					1	33137907	33152527	Diacylglycerol kinase catalytic region domain containing protein
Os01g0782300									Os01g0782300	1.31		sen+					1	33147601	33148342	Conserved hypothetical protein
Os01g0783100	BRADI_2g51860v3	-2.28		sen-					Os01g0783100		-0.83	tol-	Zm00001d012612	-3.29		sen-	1	33182589	33186141	Pentatricopeptide repeat domain containing protein
Os01g0783200	BRADI_2g51870v3	1.38		sen+					Os01g0783200	0.56	0.47						1	33185460	33192979	Similar to Diacylglycerol kinase
Os01g0783500									Os01g0783500	0.54		sen+					1	33198608	33201733	Rossmann-like alpha/beta/alpha sandwich fold domain containing protein
Os01g0783600													Zm00001d043259	-1.52		sen-	1	33205190	33207633	Similar to Frataxin
Os01g0783800									Os01g0783800	-0.75		sen-					1	33210231	33216314	Serine/threonine protein kinase-related domain containing protein
Os01g0784200	BRADI_2g51940v3	1.06		sen+													1	33227652	33231831	Serine/threonine protein kinase-related domain containing protein
Os01g0784600													Zm00001d031420	-1.45		sen-	1	33244777	33248099	Similar to nodulation protein-related
Os01g0784700	BRADI_2g51967v3	-3.07		sen-													1	33248878	33256713	Serine/threonine protein kinase-related domain containing protein
Os01g0784800	BRADI_2g51980v3	-1.07		sen-	HORVU3Hr1G077250		-0.71	tol-					Zm00001d012607	1.76		sen+	1	33264366	33268325	Flavodoxin/nitric oxide synthase domain containing protein
Os01g0785700																	1	33318039	33322908	Pentatricopeptide repeat domain containing protein
Os01g0786800	BRADI_2g52060v3	-1.14		sen-	HORVU3Hr1G077530		-0.69	tol-					Zm00001d043240	-1.31		sen-	1	33364391	33367253	Protein of unknown function DUF81 domain containing protein
Os01g0786900	BRADI_2g52070v3	-1.22		sen-													1	33368985	33374621	WD40 repeat-like domain containing protein
Os01g0787400													Zm00001d012604	1.52		sen+	1	33392410	33395692	Conserved hypothetical protein
Os01g0787600					HORVU4Hr1G076750		-1.15	tol-					Zm00001d012603	2.78		sen+	1	33409655	33415562	Similar to Salicylic acid-binding protein 2
Os01g0788200													Zm00001d043234	-1.92		sen-	1	33448396	33449269	Nuclear transport factor 2 domain containing protein
Os01g0788500					HORVU3Hr1G077670		-1.11	tol-									1	33460402	33463754	Disease resistance protein domain containing protein
Os01g0788800	BRADI_2g52160v3	-1.59		sen-													1	33474895	33478458	Similar to Isoform 2 of Homeobox-leucine zipper protein TF1
Os01g0788950													Zm00001d043229	-1.25		sen-	1	33482291	33484203	Similar to partner of Nob1
Os01g0791033	BRADI_1g39206v3	-1.29		sen-													1	33533878	33534687	Similar to ribulose-15-bisphosphate carboxylase/oxygenase large subunit
Os01g0793300	BRADI_2g52260v3	1.17		sen+					Os01g0793300	1.57		sen+					1	33601018	33605323	Di-copper centre-containing domain containing protein
Os01g0793500	BRADI_2g52270v3	0.69		sen+													1	33609424	33614332	Similar to mRNA clone: RTFL01-05-M08
Os01g0793800													Zm00001d043221	3.08	-1.01	sen+/tol-	1	33618550	33619174	Conserved hypothetical protein
Os01g0793900	BRADI_2g52300v3	1.57		sen+	HORVU3Hr1G077890		-1.33	tol-	Os01g0793900	-1.14		sen-					1	33625287	33626043	Conserved hypothetical protein
Os01g0794100													Zm00001d043220	2.59	-0.98	sen+/tol-	1	33629559	33630287	Conserved hypothetical protein
Os01g0794400	BRADI_2g52317v3	6.25		sen+	HORVU3Hr1G077930	3.44	2.42	ΔLFC<-1	Os01g0794400	1.52	1.44		Zm00001d012591	4.21		sen+	1	33642080	33650929	Thioredoxin domain 2 containing protein
Os01g0794500	BRADI_2g52330v3	0.78		sen+													1	33651161	33655179	Translation initiation factor SUI1 domain containing protein
Os01g0794800					HORVU3Hr1G000120		-1.41	tol-									1	33659782	33663245	Similar to Subtilase
Os01g0795000									Os01g0795000	-1.23		sen-					1	33668016	33672415	Subtilase
Os01g0795200					HORVU3Hr1G077950	3.16	-3.33	sen+/tol-									1	33684778	33688225	Similar to Subtilase
Os01g0795832									Os01g0795832	-1.19	-1.81						1	33708780	33709258	Conserved hypothetical protein
Os01g0796400	BRADI_2g52350v3	0.73		sen+													1	33730378	33733010	NAD(P)-binding domain containing protein
Os01g0796500	BRADI_2g52356v3	-0.79		sen-													1	33733124	33735548	Similar to predicted protein
Os01g0796700																	1	33740652	33745858	Zinc finger RING/FYVE/PHD-type domain containing protein
Os01g0797600	BRADI_2g52370v3	-0.88		sen-					Os01g0797600	1.18	0.73		Zm00001d012585	-2.73		sen-	1	33766984	33768044	AP2/ERF family protein ERF-associated EAR-motif-containing repressor Abiotic stress response Stress signalin
Os01g0798500	BRADI_2g52400v3	-0.9		sen-									Zm00001d043201	-2.7		sen-	1	33803155	33805386	Similar to predicted protein
Os01g0798800	BRADI_2g52417v3	-0.76		sen-													1	33812915	33815127	Protein of unknown function DUF594 family protein
Os01g0799500	BRADI_2g52460v3	2.04		sen+									Zm00001d012578	2.19	0.82	ΔLFC<-1	1	33837388	33840967	Methyladenine glycosylase domain containing protein
Os01g0800300									Os01g0800300	0.69		sen+	Zm00001d043193	-0.76		sen-	1	33890098	33891727	Immunoglobulin/major histocompatibility complex conserved site domain containing protein
Os01g0800500					HORVU3Hr1G078360	2.44	4	ΔLFC>1	Os01g0800500	1.15	1.62						1	33897380	33904345	Purple acid phosphatase N-terminal domain containing protein
Os01g0800900													Zm00001d043190	-2.69		sen-	1	33917599	33918536	Conserved hypothetical protein
Os01g0801000																	1	33919497	33924589	Similar to Apurinic endonuclease-redox protein (DNA-(apurinic or apyrimidinic site) lyase) (EC 4.2.99.18)
Os01g0801100																	1	33926609	33929782	Similar to Apurinic endonuclease-redox protein (DNA-(apurinic or apyrimidinic site) lyase) (EC 4.2.99.18)
Os01g0801600													Zm00001d012567	2.34		sen+	1	33952187	33956006	Similar to Glycerol-3-phosphate dehydrogenase
Os01g0801700	BRADI_2g52580v3	1.11		sen+													1	33956754	33960102	Homolog of Arabidopsis GCD1 (GAMETE CELLS DEFECTIVE1) Early embryogenesis and endosperm developmen
Os01g0801901	BRADI_2g52590v3	-2.09		sen-													1	33961844	33963347	Similar to Transcription factor (Fragment)
Os01g0802850	BRADI_2g52660v3	0.75		sen+									Zm00001d012562	1.25		sen+	1	34017713	34019239	Protein of unknown function DUF250 domain containing protein
Os01g0803200	BRADI_2g52670v3	-0.65		sen-	HORVU3Hr1G078680		-1.88	tol-	Os01g0803200		-0.43	tol-	Zm00001d012561	1.35		sen+	1	34033159	34034924	Cysteine proteinase inhibitor-
Os01g0803300									Os01g0803300	2.34	1.05	ΔLFC<-1	Zm00001d043171	11.09		sen+	1	34043179	34044975	Protein of unknown function DUF6 transmembrane domain containing protein
Os01g0803900																	1	34089461	34091158	Cytochrome P450 family protein
Os01g0805000	BRADI_2g41560v3	-2.02	0.84	sen-/tol+									Zm00001d043170	-2.29		sen-	1	34133841	34135636	50S ribosomal protein L34
Os01g0805200																	1	34138399	34139709	Protein of unknown function DUF3007 domain containing protein
Os01g0805300	BRADI_2g52730v3	-1.98	0.51	sen-/tol+					Os01g0805300	0.51	-0.59	sen+/tol-	Zm00001d043167	-1.65	-0.9		1	34139768	34141211	Mog1/PsbP alpha/beta/alpha sandwich domain containing protein
Os01g0805400	BRADI_2g52740v3	2.31		sen+	HORVU3Hr1G078840		-1.55	tol-	Os01g0805400	-1.35		sen-					1	34141778	34145201	UDP-glucuronosyl/UDP-glucosyltransferase family protein
Os01g0805500													Zm00001d043165	-2.72		sen-	1	34146163	34149144	Similar to indole-3-acetate beta-glucosyltransferase
Os01g0805800	BRADI_2g52777v3	-1.03		sen-									Zm00001d012557	-0.93		sen-	1	34163740	34166383	DNA-directed RNA polymerase RPB5 subunit domain containing protein
Os01g0805900													Zm00001d043158	-2.15		sen-	1	34167936	34171573	Tubulin beta-2 chain (Beta-2 tubulin)
Os01g0806000													Zm00001d043157	1.15		sen+	1	34176203	34179518	Similar to UBA-like
Os01g0806200																	1	34183076	34186865	Cyclin-like F-box domain containing protein
Os01g0807900													Zm00001d043152	1.34		sen+	1	34295651	34305961	Similar to Dihydropyrimidinase (Dihydropyrimidine amidohydrolase) (EC 3.5.2.2)
Os01g0808100	BRADI_2g52860v3	-0.85		sen-									Zm00001d043153	1.36		sen+	1	34306542	34313315	Similar to BZIP transcription factor
Os01g0808400	BRADI_2g52870v3	-4.69		sen-													1	34325310	34327888	Similar to Calcium-dependent protein kinase (Fragment)
Os01g0809300	BRADI_2g52890v3	0.7		sen+					Os01g0809300	-0.46		sen-					1	34379096	34383084	Leucine-rich repeat N-terminal domain containing protein
Os01g0810000	BRADI_2g52910v3	1.32		sen+													1	34409226	34412529	Utp11 family protein
Os01g0810100													Zm00001d043146	-1.15		sen-	1	34412916	34416988	Ribonuclease III domain containing protein
Os01g0810300									Os01g0810300	-0.8	-1.17						1	34421011	34423534	Similar to Calmodulin-like protein
Os01g0812000																	1	34508452	34512776	Transcriptional activator of gibberellin-dependent alpha-amylase expression Regulation of nutrient mobilization in germinatio
Os01g0812200	BRADI_2g53040v3	3.02		sen+													1	34531774	34533771	Cyclin-like F-box domain containing protein
Os01g0812850																	1	34553385	34553900	Conserved hypothetical protein
Os01g0812900	BRADI_2g53050v3	1.79		sen+													1	34558533	34559935	Similar to alphavirus core protein family
Os01g0813100	BRADI_2g53060v3	0.82		sen+					Os01g0813100		-0.68	tol-	Zm00001d043117		0.58	tol+	1	34565292	34568290	bZIP transcription factor Modulation of the floral transition Floral represso
Os01g0813700	BRADI_3g45636v3	2.04		sen+	HORVU3Hr1G079750		1.17	tol+									1	34588835	34602432	Similar to Non-cyanogenic beta-glucosidase
Os01g0814000	BRADI_2g53107v3	0.96		sen+													1	34620233	34623904	Nuclear fragile X mental retardation-interacting protein 1 conserved domain domain containing protein
Os01g0814100	BRADI_2g53120v3	1.42		sen+									Zm00001d012535	-3.24		sen-	1	34626255	34628601	Similar to Bindin (Fragment)
Os01g0814400	BRADI_2g53150v3	-0.61		sen-					Os01g0814400	-0.56		sen-	Zm00001d012532	0.85		sen+	1	34639786	34642794	Conserved hypothetical protein
Os01g0814800	BRADI_2g53170v3	-1.72	0.87	sen-/tol+									Zm00001d043101	-3.29		sen-	1	34647146	34650771	Similar to Cysteine synthase chloroplast precursor (EC 2.5.1.47
Os01g0815100									Os01g0815100	0.75		sen+					1	34664064	34665591	Hypothetical conserved gene
Os01g0815400	BRADI_2g53200v3	-1.51		sen-									Zm00001d043096	-1.33		sen-	1	34674484	34676184	Conserved hypothetical protein
Os01g0815700													Zm00001d012529	-0.97		sen-	1	34678036	34682189	Zinc finger RanBP2-type domain containing protein
Os01g0815800	BRADI_2g53220v3	0.77		sen+													1	34682524	34685373	Similar to 60S ribosomal protein L24-A (L30A) (RP29) (YL21)
Os01g0816100	BRADI_2g53260v3	-3.19		sen-									Zm00001d012527	1.37	-0.51	sen+/tol-	1	34692912	34694391	Similar to NAC domain protein
Os01g0816400																	1	34705486	34722561	Similar to microtubule organization protein
Os01g0816600													Zm00001d043091	1.33		sen+	1	34738566	34744023	Similar to predicted protein
Os01g0817000													Zm00001d043089	1.53		sen+	1	34769362	34772195	Protein of unknown function DUF607 family protein
Os01g0817650	BRADI_2g53330v3	0.95		sen+									Zm00001d043087	2.27		sen+	1	34801187	34802060	Protein of unknown function DUF567 family protein
Os01g0817700																	1	34804310	34808023	Similar to 23-bisphosphoglycerate-independent phosphoglycerate mutase (EC 5.4.2.1) (Phosphoglyceromutase) (BPG-independent PGAM) (PGAM-I)
Os01g0818000													Zm00001d043083	0.81		sen+	1	34834574	34839504	Auxin efflux carrier domain containing protein
Os01g0818400													Zm00001d043076	1.3		sen+	1	34862487	34865889	Homeodomain-like containing protein
Os01g0818600									Os01g0818600	-1.8	-1.17						1	34868412	34872484	Similar to Leucine-rich repeat transmembrane protein kinase
Os01g0818700									Os01g0818700	-1.46	-0.91		Zm00001d043075	1.06		sen+	1	34873061	34880637	Leucine-rich repeat N-terminal domain containing protein
Os01g0819000	BRADI_2g53411v3	0.86		sen+													1	34888313	34892652	Similar to transposon protein CACTA En/Spm sub-class
Os01g0819200	BRADI_4g36490v3	0.79		sen+	HORVU5Hr1G084010	-0.87		sen-									1	34903696	34906955	Similar to calcium lipid binding protein-like
Os01g0819400	BRADI_2g53430v3	-0.94		sen-													1	34917652	34919637	Similar to Ubiquitin carrier protein
Os01g0819800					HORVU3Hr1G080810		1.32	tol+									1	34946618	34949027	Pentatricopeptide repeat domain containing protein
Os01g0819900																	1	34949168	34959353	Armadillo-like helical domain containing protein
Os01g0820000	BRADI_2g53470v3	2.12		sen+	HORVU3Hr1G080830		-1.14	tol-					Zm00001d012510	1.71		sen+	1	34961974	34963697	Similar to Cinnamate-4-hydroxylase
Os01g0821600									Os01g0821600	1.79	1.8						1	35062738	35064472	WRKY transcription factor 48-like protein (WRKY transcription factor 21)
Os01g0821700									Os01g0821700	0.48		sen+					1	35064445	35068207	Similar to Chitin-binding lectin 1 precursor (PL-I)
Os01g0822200					HORVU3Hr1G081100		-1.17	tol-					Zm00001d036640	1.6		sen+	1	35096177	35100619	Protein kinase core domain containing protein
Os01g0822800									Os01g0822800		-0.53	tol-					1	35121625	35122986	Similar to RING-H2 finger protein ATL3C
Os01g0822900																	1	35130013	35130913	Similar to Lipid transfer protein
Os01g0823300	BRADI_2g53590v3	0.96		sen+					Os01g0823300		-0.62	tol-					1	35153705	35155694	Similar to Ribosomal protein S26
Os01g0823600	BRADI_2g53620v3	-1.27		sen-					Os01g0823600	0.49	0.54		Zm00001d043045	-1.77		sen-	1	35175501	35176458	Conserved hypothetical protein
Os01g0823700																	1	35176451	35180214	Protein of unknown function DUF641 plant domain containing protein
Os01g0823900													Zm00001d043043	0.99		sen+	1	35185594	35188003	U-box E3ubiquitin ligase Positive regulation of cold stress respons
Os01g0824600					HORVU3Hr1G081420	-0.66		sen-	Os01g0824600	0.81	0.88						1	35228913	35234373	Serine/threonine protein kinase domain containing protein
Os01g0824800									Os01g0824800	-0.7		sen-					1	35243923	35246577	Conserved hypothetical protein
Os01g0824900	BRADI_2g53680v3	2.9		sen+													1	35247876	35248925	Protein of unknown function DUF688 domain containing protein
Os01g0825000	BRADI_2g53690v3	1.35		sen+													1	35257561	35259062	Similar to LOB domain protein 12
Os01g0825500																	1	35303468	35305739	Nodulin-like domain containing protein
Os01g0825700	BRADI_2g53720v3	-0.61		sen-													1	35314473	35318814	Similar to VHS2 protein (Fragment)
Os01g0825800	BRADI_2g53730v3	-1.18		sen-					Os01g0825800	-1.25		sen-	Zm00001d012485		-1.54	tol-	1	35320840	35327164	Amino acid transporter transmembrane domain containing protein
Os01g0826000	BRADI_2g53750v3	1.16		sen+													1	35332717	35333445	Heavy metal transport/detoxification protein domain containing protein
Os01g0826400					HORVU3Hr1G088200		-1.91	tol-	Os01g0826400	-3.36	-1.67	ΔLFC>1					1	35347982	35350546	WRKY transcription factor 24 (WRKY24)
Os01g0826800	BRADI_2g53770v3	2.47		sen+									Zm00001d012480	-1.69		sen-	1	35378733	35379626	Conserved hypothetical protein
Os01g0826900													Zm00001d043023		0.5	tol+	1	35386776	35391613	Domain of unknown function DUF399 domain containing protein
Os01g0827200	BRADI_2g53790v3	0.72		sen+													1	35396166	35400138	Phox-like domain containing protein
Os01g0827300	BRADI_2g53800v3	1.98		sen+													1	35402795	35405298	Putative laccase precursor Abiotic stress respons
Os01g0827500									Os01g0827500	0.5		sen+					1	35409292	35411679	Exo70 exocyst complex subunit family protein
Os01g0828100									Os01g0828100		0.59	tol+					1	35431411	35432857	Similar to Cinnamoyl-CoA reductase
Os01g0829000													Zm00001d043009	-2.01		sen-	1	35477420	35479511	Thioredoxin-like fold domain containing protein
Os01g0830000									Os01g0830000	0.52	0.66						1	35505513	35508520	Similar to Plastid sufB (Fragment)
Os01g0830100	BRADI_2g53970v3	-0.7	1.32	sen-/tol+													1	35508869	35513088	Pyridine nucleotide-disulphide oxidoreductase NAD-binding region domain containing protein
Os01g0830500																	1	35525560	35527592	2OG-Fe(II) oxygenase domain containing protein
Os01g0830700					HORVU3Hr1G087740		-1.53	tol-	Os01g0830700	-2.03		sen-					1	35538475	35544326	Protein of unknown function DUF231 plant domain containing protein
Os01g0831200																	1	35582280	35585575	Ubiquitin domain containing protein
Os01g0831800	BRADI_3g51707v3	1.93		sen+													1	35594900	35595772	Conserved hypothetical protein
Os01g0832200	BRADI_2g54067v3	0.77		sen+													1	35609621	35613094	Similar to selT-like protein
Os01g0832300	BRADI_2g54080v3	0.71		sen+													1	35619733	35625793	Similar to Calcium-dependent protein kinase
Os01g0832600													Zm00001d042980	10.1		sen+	1	35636303	35640933	Similar to Leucoanthocyanidin dioxygenase-like protein
Os01g0832900													Zm00001d010258	-2.21		sen-	1	35653186	35658307	Similar to ATP binding protein
Os01g0833000									Os01g0833000		-0.91	tol-	Zm00001d042978	-2.16		sen-	1	35658744	35660945	Pentatricopeptide repeat domain containing protein
Os01g0833150									Os01g0833150	0.75		sen+					1	35682337	35682777	Similar to predicted protein
Os01g0833200	BRADI_2g54127v3	-1.41		sen-					Os01g0833200	0.66		sen+					1	35682818	35685747	Similar to expressed protein
Os01g0833400	BRADI_2g54138v3	1.29		sen+									Zm00001d012450	2.03		sen+	1	35686409	35687796	Conserved hypothetical protein
Os01g0833500																	1	35688062	35691424	Similar to Serine carboxypeptidase II-1 precursor (EC 3.4.16.6) (CP-MII.1) (Fragment)
Os01g0833600									Os01g0833600	1.67	1.79						1	35692800	35693807	Conserved hypothetical protein
Os01g0834100	BRADI_2g54177v3	-1.14		sen-													1	35721021	35722721	Aldehyde dehydrogenase conserved site domain containing protein
Os01g0834200	BRADI_2g54190v3	0.68		sen+													1	35732665	35743682	Similar to T-cell immune regulator 1 transcript variant 3 (Fragment)
Os01g0834500	BRADI_2g54210v3	0.66		sen+					Os01g0834500		-0.58	tol-	Zm00001d042966	-1.21		sen-	1	35760071	35761608	Similar to 40S ribosomal protein S23 (S12)
Os01g0834700	BRADI_2g54220v3	0.79		sen+					Os01g0834700	0.42		sen+					1	35767582	35772351	Zinc finger CCCH-type domain containing protein
Os01g0834900									Os01g0834900	1.87		sen+					1	35781678	35782089	Hypothetical conserved gene
Os01g0835700	BRADI_2g54260v3	-3.32		sen-													1	35827222	35828772	CCT domain containing protein
Os01g0835800													Zm00001d042955	-1.78		sen-	1	35832991	35836375	Hypothetical conserved gene
Os01g0836600	BRADI_2g54300v3	-4.67		sen-									Zm00001d012438	-1.76		sen-	1	35861267	35863888	ATP-binding cassette (ABC) transporter Half-size ABC transporter of the G family Pollen wall formatio
Os01g0836800									Os01g0836800	-1.34	-0.66						1	35871455	35873198	Transmembrane receptor eukaryota domain containing protein
Os01g0837000					HORVU3Hr1G087050		-0.85	tol-	Os01g0837000	-3.05	-2.22						1	35885095	35888562	Ankyrin repeat containing protein
Os01g0837300									Os01g0837300	-0.73		sen-					1	35897015	35900580	Similar to UDP-glucuronic acid decarboxylase 1
Os01g0837500	BRADI_2g54390v3	1.08		sen+													1	35902972	35908325	Similar to Ruvbl1 protein
Os01g0837600	BRADI_2g54400v3	2.44		sen+	HORVU3Hr1G087010	2.56		sen+	Os01g0837600	-0.65	-0.82						1	35912084	35913241	Similar to plant-specific domain TIGR01589 family protein
Os01g0837800	BRADI_2g54410v3	-2.35		sen-					Os01g0837800	0.45	0.62						1	35917435	35921969	Metal tolerance protein Manganese transporter Mn-cation diffusion facilitator (CDF ) Mn and other heavy metal tolerance and homeostasi
Os01g0838200	BRADI_2g54430v3	-2.66		sen-													1	35952915	35953433	Conserved hypothetical protein
Os01g0838350									Os01g0838350	2.51	1.63						1	35958635	35959019	Conserved hypothetical protein
Os01g0839100													Zm00001d012427	4.72		sen+	1	36001242	36002101	Zinc finger C2H2 domain containing protein
Os01g0839200													Zm00001d012426	2.45	-2.39	sen+/tol-	1	36002559	36005000	DUF966 family protein Abiotic stress respons
Os01g0839500									Os01g0839500	0.59		sen+					1	36014027	36014684	Histone-fold domain containing protein
Os01g0839700																	1	36017205	36023468	Similar to Ubiquitin carrier protein
Os01g0840100									Os01g0840100	1.94	0.73	ΔLFC<-1					1	36039716	36043151	Heat shock protein Hsp70 family protein
Os01g0840200									Os01g0840200	0.59	0.6						1	36044182	36046520	HSP20-like chaperone domain containing protein
Os01g0841000					HORVU3Hr1G086380		-1.01	tol-					Zm00001d042918	4.13		sen+	1	36094898	36096559	ENTH/VHS domain containing protein
Os01g0841200	BRADI_2g54630v3	1.34		sen+													1	36105408	36108015	Protein of unknown function DUF246 plant family protein
Os01g0841600																	1	36129470	36132564	Triose phosphate isomerase (EC 5.3.1.1) Abiotic stress response Response to methylglyoxal (cytotoxin
Os01g0841700					HORVU3Hr1G086220		-2.86	tol-	Os01g0841700	-3.61	-1.86	ΔLFC>1					1	36135911	36137281	Similar to Isoform ERG1b of Elicitor-responsive protein 1
Os01g0841800													Zm00001d042908	-1.42		sen-	1	36141663	36146280	Ribonuclease II and R domain containing protein
Os01g0842200					HORVU3Hr1G086210		-1.01	tol-									1	36158308	36161507	Similar to Scarecrow-like 9 (Fragment)
Os01g0842500	BRADI_2g54690v3	3.28		sen+													1	36177292	36180127	Similar to Laccase (EC 1.10.3.2)
Os01g0842600									Os01g0842600	0.64		sen+					1	36182463	36187878	Similar to AAA-metalloprotease FtsH
Os01g0843800	BRADI_2g54740v3	6.6		sen+													1	36236705	36239144	Similar to L-ascorbate oxidase
Os01g0844000									Os01g0844000		-0.61	tol-					1	36248519	36248977	Conserved hypothetical protein
Os01g0844200													Zm00001d012414	-3.95		sen-	1	36251954	36252630	DVL family protein
Os01g0844300	BRADI_2g54760v3	4.52		sen+													1	36253547	36256956	Similar to Peptidylprolyl isomerase
Os01g0844400	BRADI_2g54770v3	1.86		sen+													1	36257567	36261744	Similar to palmitoyltransferase PFA4
Os01g0844500	BRADI_2g54777v3	5.69		sen+									Zm00001d012415	-6.35		sen-	1	36268205	36269639	Peptidase aspartic catalytic domain containing protein
Os01g0844800					HORVU3Hr1G086020		0.97	tol+									1	36278953	36286380	Similar to Pumilio RBD (Fragment)
Os01g0845100	BRADI_2g54800v3	1.96		sen+													1	36296586	36298621	Protein of unknown function DUF668 family protein
Os01g0846000									Os01g0846000	0.5		sen+					1	36325343	36336541	Nucleic acid-binding OB-fold domain containing protein
Os01g0846300	BRADI_2g54810v3	5.21		sen+	HORVU3Hr1G085930	1.7	1.1		Os01g0846300	1.13	1.09		Zm00001d012401	3	0.92	ΔLFC<-1	1	36343948	36346009	Similar to Protein phosphatase 2C
Os01g0846400									Os01g0846400	1.52	2.16						1	36346113	36349545	Conserved hypothetical protein
Os01g0846450									Os01g0846450	0.87	1.5						1	36353072	36358534	Hypothetical conserved gene
Os01g0846600	BRADI_2g54840v3	1.03		sen+													1	36368246	36373939	Protein of unknown function DUF248 methyltransferase putative family protein
Os01g0846700									Os01g0846700	1.46	1.29						1	36379625	36385146	Hypothetical protein
Os01g0847100									Os01g0847100		-1	tol-					1	36392080	36392685	Conserved hypothetical protein
Os01g0847200													Zm00001d042874		-0.74	tol-	1	36395486	36398031	Similar to Mannose-1-phosphate guanyltransferase (EC 2.7.7.13) (ATP-mannose-1- phosphate guanylyltransferase) (GDP-mannose pyrophosphorylase) (NDP- hexose pyrophosphorylase)
Os01g0847300																	1	36398984	36401707	Uncharacterised protein family UPF0497 trans-membrane plant domain containing protein
Os01g0847600	BRADI_2g54890v3	0.68		sen+													1	36403442	36407379	Aldo-keto reductase Detoxification of abiotic stress-related reactive aldehydes Oxidative and heat stress tolerance Herbicide resistanc
Os01g0847700									Os01g0847700	-0.72		sen-					1	36410714	36414587	Aldo-keto reductase Detoxification of reactive aldehydes Abiotic stress toleranc
Os01g0847800					HORVU3Hr1G085780		-0.74	tol-	Os01g0847800	-1.23	-0.57						1	36418161	36420029	Similar to Aldose reductase (EC 1.1.1.21) (AR) (Aldehyde reductase) (20-alpha- hydroxysteroid dehydrogenase) (EC 1.1.1.149) (20-alpha-HSD)
Os01g0848200	BRADI_2g54920v3	5.16		sen+	HORVU3Hr1G085760	3.01		sen+	Os01g0848200		-0.82	tol-					1	36430978	36440843	Similar to Delta 1-pyrroline-5-carboxylate synthetase (P5CS) [Includes: Glutamate 5-kinase (EC 2.7.2.11) (Gamma-glutamyl kinase) (GK)%3B Gamma-glutamyl phosphate reductase (GPR) (EC 1.2.1.41) (Glutamate-5-semialdehyde dehydrogenase) (Glutamyl-gamma-semialdehyde dehydrogenase)]
Os01g0848400	BRADI_2g54940v3	1.54		sen+													1	36445456	36449951	BEL1-type homeobox family Seed shatterin
Os01g0848900													Zm00001d042863	0.95		sen+	1	36480510	36483990	Conserved hypothetical protein
Os01g0849000	BRADI_2g54970v3	3.3		sen+					Os01g0849000	2.47		sen+					1	36484020	36484818	Hypothetical protein
Os01g0849600																	1	36496934	36498132	Similar to ENOD18 protein (Fragment)
Os01g0849950	BRADI_5g26567v3	1.1		sen+									Zm00001d026665	1.22		sen+	1	36527939	36529713	Hypothetical protein
Os01g0850000													Zm00001d042853		0.84	tol+	1	36528042	36529841	Uncharacterised conserved protein UCP022260 domain containing protein
Os01g0850100	BRADI_2g55020v3	0.87		sen+					Os01g0850100	-0.56	-0.67						1	36540164	36545196	Similar to Phosphatidic acid phosphatase-like protein
Os01g0850550	BRADI_2g55050v3	-0.78		sen-	HORVU3Hr1G085520		-1.16	tol-									1	36617104	36621116	Similar to Laccase-6
Os01g0851000													Zm00001d042847	-1.46		sen-	1	36640971	36647111	Carbohydrate/purine kinase domain containing protein
Os01g0851100	BRADI_2g55090v3	-1.29		sen-									Zm00001d012362		0.55	tol+	1	36643577	36648018	GDP-fucose protein O-fucosyltransferase domain containing protein
Os01g0851700	BRADI_2g55120v3	-1		sen-													1	36670321	36676478	Similar to Cytosolic starch phosphorylase (Fragment)
Os01g0852200									Os01g0852200	0.54		sen+	Zm00001d042841	-1.17		sen-	1	36687545	36695629	Similar to sialin
Os01g0853400													Zm00001d012338		0.67	tol+	1	36747521	36750925	Component of the SCF E3 ubiquitin ligase complex Jasmonate-regulated defense responses Promoting leaf senescenc
Os01g0853700	BRADI_2g55217v3	-0.76		sen-	HORVU3Hr1G085180		-1.76	tol-					Zm00001d012337	-1.74		sen-	1	36763677	36765294	Similar to MCB1 protein
Os01g0853800									Os01g0853800		-0.47	tol-					1	36771018	36772336	C2 calcium-dependent membrane targeting domain containing protein
Os01g0854000													Zm00001d042826	-1.67		sen-	1	36794890	36796983	Similar to AER
Os01g0855000	BRADI_2g55290v3	1.7		sen+									Zm00001d042813	-2.32		sen-	1	36863177	36871094	Similar to Glycerol-3-phosphate acyltransferase 6 (EC 2.3.1.15) (AtGPAT6)
Os01g0855200	BRADI_2g55297v3	-1.26		sen-	HORVU3Hr1G084970		-1.84	tol-					Zm00001d012325	-4.03	-1.76	ΔLFC>1	1	36894607	36897206	Tetratricopeptide-like helical domain containing protein
Os01g0855600													Zm00001d012321	1.21		sen+	1	36942716	36944585	Similar to Hs1pro-1 protein
Os01g0856500									Os01g0856500		-1.12	tol-					1	36998338	37004643	Auxin transporter Primary root and root hair elongation Cd stress respons
Os01g0856900									Os01g0856900		0.58	tol+					1	37021544	37023529	Glycoside hydrolase carbohydrate-binding domain containing protein
Os01g0857200					HORVU3Hr1G084590		0.98	tol+					Zm00001d012312	-2.5		sen-	1	37034026	37035656	Di-trans-poly-cis-decaprenylcistransferase family protein
Os01g0857400													Zm00001d042801	1.44		sen+	1	37043496	37049889	Amino acid transporter transmembrane domain containing protein
Os01g0857600	BRADI_2g55450v3		0.95	tol+													1	37065754	37068895	Similar to H0811D08.6 protein
Os01g0858350	BRADI_2g55490v3	1.6		sen+					Os01g0858350	1.59	0.89						1	37097377	37099130	Similar to cytochrome P450
Os01g0858900									Os01g0858900	-0.72	-0.67		Zm00001d012302	1.46		sen+	1	37133703	37135319	Glycosyl transferase family 29 protein
Os01g0859200													Zm00001d042780	5.73		sen+	1	37154448	37157448	Alpha/beta hydrolase fold-1 domain containing protein
Os01g0859300													Zm00001d012296	5.47		sen+	1	37174575	37176344	bZIP transcription factor Stress response and ABA signal transduction Regulation of plant fertilit
Os01g0859500													Zm00001d012294		-2.08	tol-	1	37181505	37188288	Similar to Basic leucine zipper protein (Liguleless2)
Os01g0860300													Zm00001d042772	-1.51		sen-	1	37231558	37234572	Similar to Ribosomal protein L1
Os01g0860500	BRADI_2g55630v3	-1.96		sen-									Zm00001d042768		-2.67	tol-	1	37239583	37240775	Similar to Hevamine A precursor [Includes: Chitinase (EC 3.2.1.14)%3B Lysozyme (EC 3.2.1.17)]
Os01g0860601																	1	37241157	37242066	Similar to Ferredoxin root R-B1
Os01g0860800									Os01g0860800	-1.01	-1.34		Zm00001d012292	4.51		sen+	1	37269811	37274701	Glycoside hydrolase family 17 protein
Os01g0860900	BRADI_2g55697v3	-2.79		sen-													1	37275755	37277138	Conserved hypothetical protein
Os01g0861000																	1	37279687	37280386	Conserved hypothetical protein
Os01g0861700													Zm00001d042764	1.21		sen+	1	37303624	37307696	Hypothetical conserved gene
Os01g0861900	BRADI_2g55730v3	-1.06		sen-													1	37308289	37310312	Similar to transposon protein Mutator sub-class
Os01g0862200	BRADI_2g55750v3	-2.65		sen-									Zm00001d012287	-1.5		sen-	1	37315305	37316250	Conserved hypothetical protein
Os01g0862800	BRADI_2g55780v3	-3.34		sen-	HORVU3Hr1G083820		-3.17	tol-									1	37334397	37336207	NAC (NAM ATAF1/2 CUC2) transcription factor Early and transient regulator of abiotic stress response
Os01g0863300									Os01g0863300	1.14		sen+	Zm00001d012285	2.74		sen+	1	37358205	37359556	Similar to MCB2 protein
Os01g0863400					HORVU3Hr1G083750		-0.61	tol-	Os01g0863400	0.62		sen+					1	37360416	37363396	Hypothetical protein
Os01g0863800	BRADI_2g55870v3	-1.39		sen-													1	37381402	37382273	Protein of unknown function DUF623 plant domain containing protein
Os01g0864200					HORVU3Hr1G083650		-1.21	tol-	Os01g0864200	-1.24	-0.77						1	37403082	37403883	Conserved hypothetical protein
Os01g0864300													Zm00001d042750	2.55		sen+	1	37406262	37407241	Harpin-induced 1 domain containing protein
Os01g0864500									Os01g0864500	-3.46		sen-					1	37412047	37413011	Harpin-induced 1 domain containing protein
Os01g0865100									Os01g0865100	-1.42	-0.95						1	37440434	37444669	Similar to Uricase (Fragment)
Os01g0865400	BRADI_2g55960v3	1.06		sen+									Zm00001d042739		-1.95	tol-	1	37451411	37452954	UDP-glucuronosyl/UDP-glucosyltransferase family protein
Os01g0866300													Zm00001d012275	0.74		sen+	1	37514821	37518597	VAMP-like protein YKT61 (AtYKT61) (Geranylgeranylated protein 1) (AtGP1)
Os01g0866400	BRADI_2g56030v3	-2.28		sen-					Os01g0866400	0.67	0.53		Zm00001d042727	-2.3		sen-	1	37519585	37522414	Similar to Fructose-16-bisphosphatase (EC 3.1.3.11) (Fragment)
Os01g0866800																	1	37535953	37539344	Similar to F24P17.15 protein (Tubby-like protein TULP9)
Os01g0867300	BRADI_2g56096v3	2.12		sen+					Os01g0867300	0.95		sen+	Zm00001d042721	0.9		sen+	1	37556707	37560104	bZIP transcription factor Abiotic stress response ABA signaling Suppressor of floral transition upon drought stres
Os01g0867600	BRADI_2g56102v3	1.9		sen+					Os01g0867600	0.54		sen+					1	37566054	37575892	Similar to UDP-glucose:sterol glucosyltransferase (EC 2.4.1.173)
Os01g0867700									Os01g0867700	-0.67		sen-					1	37576887	37579107	Yip1 domain containing protein
Os01g0868000									Os01g0868000	-1.66	-1.35						1	37590034	37592446	AP2/ERF transcription factor Abiotic stress response Salt stress respons
Os01g0868300	BRADI_2g56160v3	1.31		sen+	HORVU3Hr1G082930	1.07	1.88										1	37625916	37636099	Similar to DNA polymerase alpha catalytic subunit (EC 2.7.7.7)
Os01g0869000									Os01g0869000	0.45	0.43						1	37655441	37661234	Protein of unknown function DUF639 family protein
Os01g0869200	BRADI_2g56210v3	-1.28		sen-					Os01g0869200	0.58	0.55						1	37664233	37667335	Magnesium transporter Mg-mediated aluminum toleranc
Os01g0869500																	1	37686059	37689440	Plant nuclear matrix 1 family protein
Os01g0869800	BRADI_2g56260v3		0.78	tol+					Os01g0869800	0.47		sen+	Zm00001d042697	-1.6		sen-	1	37697024	37699582	22-kDa Photosystem II protein Photoprotectio
Os01g0869900	BRADI_2g56267v3	2.4		sen+	HORVU3Hr1G082690		0.83	tol+	Os01g0869900	0.62	0.71		Zm00001d042695		-0.55	tol-	1	37710241	37714835	Serine/threonine protein kinase Hyperosmotic stress respons
Os01g0870100					HORVU3Hr1G082670		0.59	tol+									1	37714857	37720652	Ion channel DMI1.Cation channel protein
Os01g0870201	BRADI_1g22170v3	0.87		sen+	HORVU5Hr1G121120		1.1	tol+									1	37722462	37726352	Similar to GPI transamidase subunit PIG-U family protein
Os01g0870300									Os01g0870300	0.61	0.59						1	37727421	37737822	Hypothetical conserved gene
Os01g0871100					HORVU3Hr1G082590		-3.11	tol-									1	37763432	37770402	Alpha/beta hydrolase fold-1 domain containing protein
Os01g0871200																	1	37773994	37778565	Zinc finger C2H2-type domain containing protein
Os01g0871300					HORVU1Hr1G074590		0.47	tol+									1	37779512	37782837	Pyridoxal phosphate-dependent transferase major region domain containing protein
Os01g0871500									Os01g0871500	-0.47		sen-					1	37790484	37792882	TGF-beta receptor type I/II extracellular region family protein
Os01g0871600	BRADI_2g56360v3		-1.01	tol-													1	37795606	37797741	Similar to Peptide transporter PTR2-B
Os01g0872500									Os01g0872500	-1.29		sen-					1	37834199	37836889	Oligopeptide transporter domain containing protein
Os01g0872800	BRADI_2g56460v3	-1.03		sen-													1	37853413	37857509	Similar to 3-phosphoinositide-dependent protein kinase-1 (Fragment)
Os01g0873100	BRADI_2g56470v3	-2.61		sen-	HORVU3Hr1G082280		-0.75	tol-					Zm00001d042673	-2.77		sen-	1	37866113	37866722	Similar to Amidophosphoribosyltransferase chloroplast precursor (EC 2.4.2.14) (Glutamine phosphoribosylpyrophosphate amidotransferase) (ATASE) (GPAT)
Os01g0873700	BRADI_2g56480v3	-0.82		sen-	HORVU3Hr1G082230		-0.6	tol-									1	37887626	37890353	Protein of unknown function DUF803 family protein
Os01g0873900	BRADI_2g56500v3	0.52		sen+					Os01g0873900	-0.46		sen-	Zm00001d012257	-2.03		sen-	1	37899282	37903267	Similar to F23M19.3
Os01g0874100													Zm00001d042667	-0.94		sen-	1	37914774	37918962	Hypothetical conserved gene
Os01g0874300					HORVU3Hr1G082210		-1.21	tol-	Os01g0874300	0.99		sen+	Zm00001d012255	2.38		sen+	1	37932258	37933372	Similar to MybHv5 (Fragment)
Os01g0874700																	1	37948867	37951945	GOLD domain containing protein
Os01g0874800	BRADI_2g56537v3	-1.34		sen-									Zm00001d042663	-4.82		sen-	1	37955091	37959001	Similar to DNA polymerase I
Os01g0874900													Zm00001d012247		-0.62	tol-	1	37962564	37966769	Similar to Hydroxymethyltransferase
Os01g0875000													Zm00001d042660	-1.88		sen-	1	37968972	37970334	Conserved hypothetical protein
Os01g0875500	BRADI_2g56607v3	1.09		sen+													1	37994513	38001584	Similar to Beta-galactosidase (EC 3.2.1.23)
Os01g0875700									Os01g0875700	1.16		sen+	Zm00001d042653	-1.56		sen-	1	38009641	38011902	Heat shock protein DnaJ family protein
Os01g0876100	BRADI_2g56640v3	-2.89		sen-													1	38013613	38021799	Similar to Chloride channel
Os01g0876300	BRADI_2g56650v3	-2		sen-													1	38022813	38024140	F-box associated type 1 domain containing protein
Os01g0876400	BRADI_2g56660v3	1.36		sen+													1	38026660	38030181	Sad1/UNC-like C-terminal domain containing protein
Os01g0877500																	1	38081675	38084956	Zinc finger RING/FYVE/PHD-type domain containing protein
Os01g0878000									Os01g0878000	-0.9	-1.13						1	38101549	38102991	Conserved hypothetical protein
Os01g0878300	BRADI_2g56750v3	-5.15		sen-	HORVU3Hr1G081600	-1.94		sen-					Zm00001d042637		-1.3	tol-	1	38112112	38117971	Protein kinase core domain containing protein
Os01g0878400	BRADI_2g56760v3	-1.04		sen-													1	38118010	38120760	Amino acid transporter transmembrane domain containing protein
Os01g0878700					HORVU3Hr1G081570		-0.79	tol-					Zm00001d012229	2.54		sen+	1	38133475	38137770	Amino acid transporter transmembrane domain containing protein
Os01g0878800					HORVU6Hr1G002390		-5.84	tol-					Zm00001d012228	0.82	-0.64	sen+/tol-	1	38139223	38142619	Similar to 45-DOPA dioxygenase extradiol
Os01g0879200									Os01g0879200	-2.57		sen-					1	38148684	38149534	Plant disease resistance response protein domain containing protein
Os01g0879500													Zm00001d012226	-2.22		sen-	1	38157319	38159782	RuBisCO-cytochrome methylase RMS1 domain containing protein
Os01g0880200					HORVU3Hr1G091400		-0.86	tol-					Zm00001d012224	-2.43		sen-	1	38197022	38202612	Glycosyl transferase family 8 protein
Os01g0880300													Zm00001d042624	1.5		sen+	1	38206952	38211683	Similar to Pectin methylesterase-like protein
Os01g0881000	BRADI_2g56865v3		-1.8	tol-													1	38228812	38237228	SNF2-related domain containing protein
Os01g0881100													Zm00001d012220		1.81	tol+	1	38238479	38240305	Epsin-like N-terminal domain containing protein
Os01g0881300	BRADI_2g56890v3	-1.56		sen-					Os01g0881300		-0.65	tol-					1	38254053	38257595	Non-protein coding transcript
Os01g0881500									Os01g0881500	-0.61		sen-	Zm00001d038225	1.15		sen+	1	38261856	38265489	Similar to Scarecrow-like 1 (Fragment)
Os01g0881800									Os01g0881800	0.7		sen+					1	38273297	38274800	Conserved hypothetical protein
Os01g0881900	BRADI_2g56920v3	1.42		sen+					Os01g0881900		-0.58	tol-					1	38275062	38279030	Leucine-rich repeat cysteine-containing containing protein
Os01g0882200	BRADI_1g43900v3	-4.14		sen-													1	38291672	38292452	Similar to octopine synthase binding factor3
Os01g0882500	BRADI_2g56960v3	-2.18		sen-					Os01g0882500		-0.56	tol-	Zm00001d042620	-2.64		sen-	1	38306570	38307754	Similar to NADH dehydrogenase I subunit N
Os01g0882800					HORVU3Hr1G091020	2.73		sen+									1	38310588	38313631	Similar to Amino acid carrier (Fragment)
Os01g0883000	BRADI_2g56990v3	-1.86		sen-													1	38319060	38325583	Similar to protein kinase
Os01g0883800									Os01g0883800	1.27		sen+	Zm00001d012212	1.93		sen+	1	38382385	38385469	Similar to GA C20oxidase2
Os01g0883900	BRADI_2g57087v3	0.81		sen+									Zm00001d012211		-1.32	tol-	1	38386425	38391652	Protein of unknown function DUF248 methyltransferase putative family protein
Os01g0884300									Os01g0884300		-0.45	tol-	Zm00001d042609	1.35		sen+	1	38398996	38401481	No apical meristem (NAM) protein domain containing protein
Os01g0884700									Os01g0884700	0.54		sen+					1	38432707	38433693	Conserved hypothetical protein
Os01g0884800																	1	38432750	38437074	Pentatricopeptide repeat domain containing protein
Os01g0884900	BRADI_2g57150v3	-0.64		sen-													1	38437193	38438811	Similar to DNA glycosylase
Os01g0885000																	1	38443627	38446419	Similar to Cytochrome c
Os01g0885200					HORVU3Hr1G090820	-1	-0.74						Zm00001d012204	-0.84		sen-	1	38448148	38450486	Uncharacterised conserved protein UCP031277 domain containing protein
Os01g0885300	BRADI_2g57180v3	1.17		sen+													1	38454841	38460529	Conserved hypothetical protein
Os01g0885600					HORVU3Hr1G090760	-0.78	-0.83		Os01g0885600	0.67		sen+	Zm00001d042596	-1.05		sen-	1	38475647	38480677	Alpha/beta hydrolase fold-1 domain containing protein
Os01g0886000	BRADI_2g57210v3	0.72		sen+	HORVU3Hr1G090730	0.83		sen+									1	38491273	38494120	Protein of unknown function DUF179 family protein
Os01g0886300	BRADI_2g57220v3	0.78		sen+													1	38509123	38513469	K Homology domain containing protein
Os01g0886350									Os01g0886350		-0.97	tol-					1	38515103	38516802	Conserved hypothetical protein
Os01g0886500													Zm00001d042589	-1.16		sen-	1	38517646	38520243	Similar to Ribosomal protein L37
Os01g0886600									Os01g0886600		-0.61	tol-					1	38520634	38526006	Similar to CLP protease regulatory subunit CLPX precursor
Os01g0886700	BRADI_4g42860v3	0.92		sen+													1	38527705	38528419	Conserved hypothetical protein
Os01g0886900	BRADI_2g57250v3	1.14		sen+					Os01g0886900	0.5	0.57						1	38534739	38539826	Similar to EMB1879 (EMBRYO DEFECTIVE 1879)
Os01g0887100	BRADI_2g57260v3	-1		sen-					Os01g0887100		0.58	tol+					1	38544060	38545821	Similar to 4-(Cytidine 5'-diphospho)-2-C-methyl-D-erythritol synthase
Os01g0888300	BRADI_2g57297v3	-0.95		sen-													1	38611671	38613870	Similar to NAC-domain containing protein 18 (ANAC018) (NO APICAL MERISTEM protein) (AtNAM)
Os01g0888500	BRADI_1g32100v3	-1.03		sen-	HORVU1Hr1G080070	1.21	1.33		Os01g0888500	-0.69	-0.78						1	38618768	38621877	Similar to Phosphoribosylformylglycinamidine synthase
Os01g0888700	BRADI_2g57330v3	0.65		sen+													1	38631901	38635571	RIO-like kinase domain containing protein
Os01g0888900													Zm00001d042572	1.75		sen+	1	38645146	38645757	Conserved hypothetical protein
Os01g0889000	BRADI_2g57350v3	0.7		sen+													1	38650527	38654601	Tetratricopeptide-like helical domain containing protein
Os01g0889800	BRADI_2g57386v3	-1.64	0.71	sen-/tol+									Zm00001d012178	-2.66		sen-	1	38684636	38688097	Rhodanese-like domain containing protein
Os01g0890300									Os01g0890300		0.97	tol+					1	38712011	38716756	Conserved hypothetical protein
Os01g0891100													Zm00001d042556	5.41		sen+	1	38750313	38750768	Similar to Polygalacturonase
Os01g0891300	BRADI_2g57440v3	1.08		sen+													1	38752615	38754941	Similar to Allyl alcohol dehydrogenase
Os01g0892300									Os01g0892300	-1.25		sen-					1	38795480	38797375	Leucine-rich repeat plant specific containing protein
Os01g0892500									Os01g0892500	-2.03	-1.52		Zm00001d042553	-1.53		sen-	1	38807395	38810531	Similar to carboxylic ester hydrolase
Os01g0892600									Os01g0892600	0.92	1.09						1	38812119	38815213	Pectinacetylesterase family protein
Os01g0892800					HORVU3Hr1G090030		-1.16	tol-									1	38818767	38822164	Similar to Ankyrin-kinase
Os01g0893400	BRADI_2g57476v3	-3.24		sen-					Os01g0893400	-0.55	-0.57						1	38843729	38846523	Zinc finger TAZ-type domain containing protein
Os01g0894000																	1	38864030	38867821	Metallophosphoesterase domain containing protein
Os01g0894300																	1	38884960	38887720	Similar to Fructokinase 1
Os01g0894500																	1	38891151	38893622	Sep15/SelM redox domain containing protein
Os01g0894600	BRADI_2g57520v3	-0.94		sen-													1	38893658	38897428	Zinc finger RING/FYVE/PHD-type domain containing protein
Os01g0894700	BRADI_2g57530v3	-1.74		sen-					Os01g0894700		-0.45	tol-	Zm00001d042533	-2.73		sen-	1	38900613	38902714	Trigger factor ribosome-binding bacterial domain containing protein
Os01g0895100	BRADI_1g18320v3	-1.41		sen-									Zm00001d042530	-1.12		sen-	1	38910993	38915492	Similar to Membrane-associated 30 kDa protein chloroplast precursor (M30)
Os01g0895500																	1	38928823	38930008	Peptidase S54 rhomboid domain containing protein
Os01g0895600	BRADI_2g57537v3	-0.85		sen-	HORVU3Hr1G089830		-1.22	tol-	Os01g0895600	-0.81	-0.69						1	38930465	38934752	Similar to Calreticulin-3
Os01g0896200													Zm00001d012167		-2.86	tol-	1	38948587	38950479	Similar to SF16 protein
Os01g0896500	BRADI_2g57590v3	-2.06	0.86	sen-/tol+					Os01g0896500	0.8		sen+	Zm00001d042526	-1.85		sen-	1	38961459	38966130	Rhodanese-like domain containing protein
Os01g0896700													Zm00001d012161	-1.48		sen-	1	38968295	38971038	Similar to 60S ribosomal protein L5
Os01g0897000					HORVU4Hr1G023490	1.32	0.99										1	38981299	38984176	Similar to Cyclin-dependent kinase B1-1
Os01g0897300					HORVU3Hr1G089550		-1.4	tol-									1	38994476	38997470	Similar to Ribonuclease 2
Os01g0897600									Os01g0897600	0.71	0.9						1	39004988	39009954	Glycoside hydrolase family 1 protein
Os01g0897700													Zm00001d042506	-1.99		sen-	1	39013826	39014879	Similar to FH protein NFH1
Os01g0898300																	1	39052287	39058529	Mitochondrial protein Root development and iron homeostasi
Os01g0898800	BRADI_2g57680v3	-2.62		sen-					Os01g0898800	0.72	0.97						1	39079600	39082185	Protein of unknown function DUF1685 domain containing protein
Os01g0898900	BRADI_2g57687v3	-1.08		sen-	HORVU3Hr1G089360	-0.89		sen-									1	39085081	39091029	Nucleotide-sugar transporter family protein
Os01g0899000																	1	39091734	39095307	Similar to Pti1 kinase-like protein
Os01g0899200									Os01g0899200		0.88	tol+	Zm00001d042499	-2.32		sen-	1	39102277	39103501	Similar to dehydration-responsive family protein
Os01g0899500	BRADI_2g57730v3	-2.31	0.94	sen-/tol+					Os01g0899500		0.75	tol+					1	39130113	39134770	Hypothetical conserved gene
Os01g0900700																	1	39195620	39196972	Similar to predicted protein
Os01g0900800													Zm00001d042482		0.64	tol+	1	39211307	39216467	Helix-loop-helix DNA-binding domain containing protein
Os01g0901000													Zm00001d042480	-1.09		sen-	1	39222268	39226573	Similar to Arm repeat-containing protein
Os01g0901500	BRADI_2g57860v3	-1.6		sen-					Os01g0901500	0.71		sen+					1	39252983	39256753	Similar to 4-coumarate--CoA ligase-like 5
Os01g0901600									Os01g0901600	2.5	2.27						1	39257838	39261362	Similar to 4-coumarate--CoA ligase-like 6
Os01g0901900					HORVU3Hr1G088970	1.58		sen+					Zm00001d012141	-3.04		sen-	1	39270573	39274992	S1 RNA binding domain containing protein
Os01g0902200	BRADI_2g57910v3	-1.31		sen-									Zm00001d042475	-1.41		sen-	1	39289364	39296595	Peptidase M3A and M3B thimet/oligopeptidase F domain containing protein
Os01g0902700	BRADI_2g57927v3	-3.42		sen-													1	39307443	39310557	Similar to Peptide transporter PTR2
Os01g0904200	BRADI_2g57952v3	-1.3		sen-													1	39357530	39362871	Protein kinase core domain containing protein
Os01g0904400																	1	39365920	39374228	Similar to Chromosome assembly protein homolog
Os01g0904500																	1	39374936	39379545	Conserved hypothetical protein
Os01g0904700													Zm00001d012128	-2.26		sen-	1	39387278	39391014	B-type response regulator Cytokinin signalin
Os01g0905200									Os01g0905200	-2.09	-1.04	ΔLFC>1					1	39408313	39410361	Exo70 exocyst complex subunit family protein
Os01g0905700	BRADI_2g58040v3	-1.21		sen-													1	39429069	39432424	Zinc finger RING/FYVE/PHD-type domain containing protein
Os01g0905800													Zm00001d042453	1	-0.75	sen+/tol-	1	39433408	39435696	Aldolase C-1
Os01g0906200	BRADI_2g58070v3	0.58		sen+									Zm00001d042451	0.98		sen+	1	39449696	39454725	Similar to heat-intolerant 1
Os01g0907300	BRADI_2g58140v3	0.7		sen+													1	39486898	39492098	Hypothetical conserved gene
Os01g0908100									Os01g0908100	-0.69		sen-					1	39538151	39541096	RabGAP/TBC domain containing protein
Os01g0908200													Zm00001d042443		-2.09	tol-	1	39544235	39548599	Member of the Bric-a-Brac/Tramtrack/Broad (BTB) family BT1/BT2 ortholog Negative regulation of nitrate uptake and nitrogen use efficienc
Os01g0908400																	1	39549164	39550832	Conserved hypothetical protein
Os01g0908500																	1	39551438	39555254	Mg2+ transporter protein CorA-like domain containing protein
Os01g0908600													Zm00001d042438	1.57		sen+	1	39562727	39565686	Amino acid transporter transmembrane domain containing protein
Os01g0908700									Os01g0908700	-1.02	-0.88		Zm00001d012101	0.87		sen+	1	39565772	39569993	Similar to Hnrpa2b1-prov protein
Os01g0908800	BRADI_2g58210v3	1.06		sen+													1	39577048	39580184	Pentatricopeptide repeat domain containing protein
Os01g0909200					HORVU3Hr1G092430		0.84	tol+									1	39595682	39606227	DEAD-like helicase N-terminal domain containing protein
Os01g0910900					HORVU3Hr1G092520		1.04	tol+	Os01g0910900	0.51	0.88						1	39682842	39683433	Conserved hypothetical protein
Os01g0911000	BRADI_2g59260v3	0.85		sen+									Zm00001d012087	-1.97		sen-	1	39684584	39687171	Sas10/Utp3/C1D domain containing protein
Os01g0911200	BRADI_2g58370v3	0.98		sen+					Os01g0911200	-0.63		sen-					1	39696056	39703152	Ribophorin II family protein
Os01g0911300	BRADI_2g58380v3	-1.62		sen-					Os01g0911300	0.57	0.45						1	39703410	39706057	Similar to Transporter associated with antigen processing-like protein
Os01g0911900	BRADI_2g58410v3	1.01		sen+													1	39737140	39741758	Similar to Uncharacterized ACR COG1565 family protein
Os01g0912700	BRADI_2g58430v3	-0.89		sen-					Os01g0912700	0.41		sen+	Zm00001d012083	-1.33		sen-	1	39777762	39779892	Similar to T23K8.14 protein
Os01g0912900					HORVU3Hr1G092840	-1.1		sen-									1	39794226	39799341	Pentatricopeptide repeat domain containing protein
Os01g0913000	BRADI_2g58440v3	-1.64		sen-									Zm00001d010871	-1.14		sen-	1	39794547	39795809	Similar to Thioredoxin F-type 2 chloroplast precursor (TRX-F2)
Os01g0913100	BRADI_2g58460v3	0.77		sen+													1	39801475	39802517	Protein of unknown function DUF538 family protein
Os01g0913600																	1	39822035	39823763	Similar to Rho GDP-dissociation inhibitor 1 (Rho GDI-1) (AtRhoGDI1)
Os01g0913800					HORVU3Hr1G092990		0.99	tol+									1	39824933	39826647	Hypothetical conserved gene
Os01g0914700													Zm00001d042378	2.05		sen+	1	39852601	39856048	Peptidase A22B signal peptide peptidase domain containing protein
Os01g0914800																	1	39857842	39861282	Protein of unknown function DUF231 plant domain containing protein
Os01g0915000	BRADI_2g58590v3	1.74		sen+													1	39866435	39867460	Protein of unknown function DUF506 plant family protein
Os01g0915800									Os01g0915800	-0.72		sen-	Zm00001d042372	0.92		sen+	1	39914190	39916470	Similar to FK506-binding protein 2-2 precursor (EC 5.2.1.8) (Peptidyl-prolyl cis- trans isomerase) (PPIase) (Rotamase) (15 kDa FKBP) (FKBP-15-2)
Os01g0915900									Os01g0915900	-1.45	0.84	sen-/tol+					1	39918940	39920664	Conserved hypothetical protein
Os01g0916100									Os01g0916100		1.12	tol+	Zm00001d042371	-1.52		sen-	1	39926253	39927260	Similar to loricrin
Os01g0916400	BRADI_2g58677v3	2.16		sen+									Zm00001d042367	1.44		sen+	1	39948114	39951519	Similar to Selenium binding protein
Os01g0916600									Os01g0916600	-0.7	-1.09						1	39954580	39956409	RNA recognition motif glycine rich protein domain containing protein
Os01g0917400	BRADI_2g58770v3	-1.76		sen-									Zm00001d042363	-1.01		sen-	1	40006067	40010924	CCCH-type zinc finger protein Resistance against bacterial blight diseas
Os01g0917500					HORVU3Hr1G093530		2	tol+									1	40018401	40023853	Leucine-rich repeat receptor-like kinase Specification of anther cell identity Control of early sporogenic development Initiation of anther wall formatio
Os01g0918400									Os01g0918400	1.87	0.72	ΔLFC<-1					1	40067581	40069618	Conserved hypothetical protein
Os01g0919400	BRADI_2g58860v3	-2.14		sen-	HORVU3Hr1G093830		2.62	tol+	Os01g0919400	0.4	0.69		Zm00001d012036	-3.71		sen-	1	40101744	40106898	Sucrose phosphate synthase Sucrose synthesis in pollen germinatio
Os01g0919600	BRADI_2g58887v3	-0.82		sen-													1	40127415	40132359	Protein of unknown function DUF707 family protein
Os01g0919700	BRADI_2g58912v3	-1.62		sen-									Zm00001d042346	-2.14		sen-	1	40133109	40138135	Alpha/beta hydrolase fold-1 domain containing protein
Os01g0919800	BRADI_2g58917v3	-1.02		sen-									Zm00001d042345	-4.1	-0.93	ΔLFC>1	1	40136226	40142760	Similar to Efflux carrier of polar auxin transport
Os01g0919900					HORVU3Hr1G094050		-0.58	tol-	Os01g0919900	0.66	0.66		Zm00001d012033	-2.07		sen-	1	40146818	40150808	Similar to Acyl-[acyl-carrier-protein] desaturase chloroplast precursor (EC 1.14.19.2) (Stearoyl-ACP desaturase) (Delta(9) stearoyl-acyl carrier protein desaturase)
Os01g0920000													Zm00001d042343		-1.01	tol-	1	40153226	40157441	Cystathionine beta-synthase core domain containing protein
Os01g0920100	BRADI_2g58950v3	2.79		sen+					Os01g0920100		0.8	tol+	Zm00001d012031	-1		sen-	1	40167809	40170157	Conserved hypothetical protein
Os01g0920300													Zm00001d012029	-0.93		sen-	1	40177696	40181549	Methyltransferase small domain containing protein
Os01g0920500													Zm00001d042337	2.73		sen+	1	40194213	40194941	Nucleotide-diphospho-sugar transferase domain containing protein
Os01g0921000					HORVU3Hr1G094340		-2.14	tol-									1	40211197	40213481	Nucleotide-diphospho-sugar transferase domain containing protein
Os01g0921200	BRADI_2g59037v3	0.89		sen+									Zm00001d042335	0.98		sen+	1	40220895	40229111	Mannosyl-oligosaccharide glucosidase N-glycan formation Auxin-mediated root developmen
Os01g0921300													Zm00001d042333	-1.29		sen-	1	40230297	40233212	Exostosin-like family protein
Os01g0921600	BRADI_2g59080v3	0.96		sen+					Os01g0921600	0.46		sen+					1	40240810	40244636	Similar to Mitochondrial import receptor subunit TOM20 (Translocase of outer membrane 20 kDa subunit)
Os01g0921800	BRADI_2g59090v3	-2.23		sen-					Os01g0921800	1.27		sen+					1	40256826	40258624	Tetratricopeptide-like helical domain containing protein
Os01g0922100													Zm00001d042325	-2.63		sen-	1	40285434	40287011	Conserved hypothetical protein
Os01g0922700									Os01g0922700	-1.85	-2.37						1	40336798	40337314	Conserved hypothetical protein
Os01g0922800	BRADI_4g30081v3	-1.3		sen-													1	40344374	40364362	MADS-box transcription factor Short-day flowering promote
Os01g0923000					HORVU3Hr1G095070		1.44	tol+					Zm00001d012010	1.07		sen+	1	40371950	40372684	Conserved hypothetical protein
Os01g0923300					HORVU3Hr1G096740		-1.24	tol-									1	40385339	40389177	Cystathionine beta-synthase core domain containing protein
Os01g0923600																	1	40397315	40403249	Hypothetical conserved gene
Os01g0923700	BRADI_2g59127v3	0.96		sen+	HORVU3Hr1G094870		0.76	tol+					Zm00001d012005		0.68	tol+	1	40403818	40409611	Similar to Histidine kinase
Os01g0924000	BRADI_2g59210v3	-1.58	0.53	sen-/tol+									Zm00001d011993	-1.74		sen-	1	40453863	40455608	Similar to Chloroplast 50S ribosomal protein L27 (Fragment)
Os01g0924200					HORVU3Hr1G095340	-2.09	-1.39						Zm00001d042307	-3.55		sen-	1	40460001	40461062	Conserved hypothetical protein
Os01g0924300	BRADI_2g59226v3	0.84		sen+													1	40463040	40467753	WD40 repeat-like domain containing protein
Os01g0924400	BRADI_2g59240v3	-1.55		sen-													1	40477240	40479093	Similar to Auxin-induced basic helix-loop-helix transcription factor
Os01g0924966	BRADI_2g59290v3	-5.15		sen-													1	40526591	40527179	Auxin responsive SAUR protein family protein
Os01g0925100									Os01g0925100		-1.52	tol-					1	40559547	40561419	Conserved hypothetical protein
Os01g0925200													Zm00001d011971	1.31		sen+	1	40563533	40566329	Similar to Enoyl CoA hydratase-like protein
Os01g0925400													Zm00001d011969	1.72		sen+	1	40572822	40573816	No apical meristem (NAM) protein domain containing protein
Os01g0925600																	1	40584383	40585467	Conserved hypothetical protein
Os01g0925700									Os01g0925700	-1.57		sen-					1	40585450	40587442	Similar to predicted protein
Os01g0926300	BRADI_2g59370v3	0.66		sen+									Zm00001d011965	2.03		sen+	1	40610656	40613449	Similar to Transaldolase (EC 2.2.1.2)
Os01g0926600																	1	40626435	40629466	Similar to Pectin-glucuronyltransferase
Os01g0926700					HORVU3Hr1G096210		-1.03	tol-	Os01g0926700	1.05		sen+	Zm00001d038905	1.36		sen+	1	40633318	40634763	Similar to secondary cell wall-related glycosyltransferase family 47
Os01g0926800																	1	40644654	40648302	Cellular retinaldehyde-binding/triple function N-terminal domain containing protein
Os01g0927600					HORVU3Hr1G097200		0.98	tol+					Zm00001d011953	-1.59		sen-	1	40695664	40700914	Auxin response factor (ARF) family protein Transcription factor Negative regulation of grain size and weigh
Os01g0927900																	1	40708658	40712960	Similar to Aspartate kinase precursor (EC 2.7.2.4)
Os01g0928000									Os01g0928000	-0.82		sen-	Zm00001d042263	1.5		sen+	1	40714216	40717112	Similar to Transcription factor ICE1 (Inducer of CBF expression 1) (Basic helix- loop-helix protein 116) (bHLH116) (AtbHLH116)
Os01g0928600					HORVU3Hr1G096620		-0.59	tol-									1	40759332	40763911	Serine palmitoyltransferase
Os01g0928800									Os01g0928800	-0.49		sen-					1	40774498	40778604	Similar to Serine palmitoyltransferase
Os01g0929100	BRADI_2g59550v3	-1.62		sen-					Os01g0929100		-0.67	tol-	Zm00001d042257	-1.47		sen-	1	40785129	40786742	Conserved hypothetical protein
Os01g0930000	BRADI_2g51247v3	-1.01		sen-					Os01g0930000		-0.49	tol-	Zm00001d012646	-1.37		sen-	1	40807159	40808380	Similar to CM0545.330.nc protein
Os01g0930200													Zm00001d011938	0.86		sen+	1	40812546	40814128	Conserved hypothetical protein
Os01g0930400					HORVU3Hr1G096860		-1.84	tol-	Os01g0930400	-2.49		sen-	Zm00001d042244	2.63		sen+	1	40825678	40830191	Potassium transporter High-affinity K acquisition Root-to-shoot K transport K-regulated salt toleranc
Os01g0930500	BRADI_2g59630v3	1.98		sen+													1	40833605	40834861	Conserved hypothetical protein
Os01g0930800	BRADI_2g59650v3	-1.6		sen-									Zm00001d043110	-0.84		sen-	1	40842288	40848191	Glycoside hydrolase family 1 protein
Os01g0930900	BRADI_2g59670v3	-2.46		sen-													1	40849226	40850197	Similar to Short chain alcohol dehydrogenase-like
Os01g0931100	BRADI_2g59690v3	1.89	-0.75	sen+/tol-					Os01g0931100	0.5		sen+	Zm00001d011929		0.62	tol+	1	40858427	40861827	Conserved hypothetical protein
Os01g0931300					HORVU3Hr1G097070		-0.75	tol-					Zm00001d011927	1.09		sen+	1	40864915	40868356	Tafazzin family protein
Os01g0931400	BRADI_2g59740v3	-1.16		sen-	HORVU3Hr1G097210		-1.81	tol-									1	40868709	40871916	Similar to thiamin pyrophosphokinase 1
Os01g0931600					HORVU3Hr1G097260		-2.46	tol-									1	40875375	40876354	Tubby C-terminal domain containing protein
Os01g0932600																	1	40915386	40920746	BTB domain containing protein
Os01g0933200	BRADI_2g59810v3	1.02		sen+					Os01g0933200		0.53	tol+					1	40930756	40932359	Heavy metal transport/detoxification protein domain containing protein
Os01g0933300									Os01g0933300	-1.13	-0.98						1	40933062	40935029	Non-protein coding transcript
Os01g0933500	BRADI_2g59830v3	-2.89		sen-									Zm00001d042217		1.29	tol+	1	40942545	40942986	Similar to FLP1
Os01g0933900	BRADI_2g59850v3	1.61		sen+					Os01g0933900	-1.27	-1.12						1	40962722	40964240	Similar to Glutathione transferase III(B) (EC 2.5.1.18)
Os01g0934000													Zm00001d042215	1		sen+	1	40966688	40971055	WD40 repeat-like domain containing protein
Os01g0934100																	1	40973410	40974780	C2 calcium-dependent membrane targeting domain containing protein
Os01g0934400	BRADI_2g59950v3	-1.8	0.88	sen-/tol+					Os01g0934400	0.9		sen+					1	40996336	40997308	Mog1/PsbP alpha/beta/alpha sandwich domain containing protein
Os01g0934800					HORVU3Hr1G098340		-4.25	tol-									1	41004305	41005945	Alpha/beta hydrolase fold-1 domain containing protein
Os01g0934900					HORVU3Hr1G098360		-2.34	tol-									1	41007465	41008440	Probable esterase PIR7A
Os01g0935400	BRADI_2g60070v3	-1.57		sen-									Zm00001d042192	-1.49		sen-	1	41057220	41058809	2OG-Fe(II) oxygenase domain containing protein
Os01g0935500	BRADI_2g60090v3	1.1		sen+					Os01g0935500	0.57		sen+	Zm00001d011913	-1.52		sen-	1	41061106	41067020	Similar to Potassium transporter
Os01g0936200													Zm00001d042183		0.55	tol+	1	41100496	41105054	Lipase class 3 family protein
Os01g0936600									Os01g0936600	-1.36		sen-					1	41110258	41110976	Hypothetical protein
Os01g0936700																	1	41112089	41114858	Conserved hypothetical protein
Os01g0936800													Zm00001d011904	-1.7		sen-	1	41117216	41122215	PapD-like domain containing protein
Os01g0937300	BRADI_2g60230v3	-1.67		sen-													1	41149956	41154666	NB-ARC domain containing protein
Os01g0938100	BRADI_1g02550v3	-2.23	0.48	sen-/tol+					Os01g0938100	0.75		sen+	Zm00001d042178	-2		sen-	1	41187052	41188691	Photosystem II protein Psb28 class 1 domain containing protein
Os01g0938400	BRADI_2g60306v3	3.27		sen+													1	41201559	41202284	Conserved hypothetical protein
Os01g0938600	BRADI_2g60310v3	1.17		sen+													1	41203849	41208693	Conserved hypothetical protein
Os01g0939300	BRADI_2g60357v3	1.17		sen+													1	41230854	41235586	BRCT domain containing protein
Os01g0939600	BRADI_2g60390v3	0.94		sen+													1	41245588	41249894	Similar to Glycerol-3-phosphate dehydrogenase-like protein (Fragment)
Os01g0939700													Zm00001d011891	-1.38		sen-	1	41251235	41272093	Similar to Esterase D (EC 3.1.1.1)
Os01g0940000					HORVU3Hr1G105360	1.17		sen+									1	41300203	41302983	Cytokinin oxidase/dehydrogenase Crown root formatio
Os01g0940100													Zm00001d042146	1.66		sen+	1	41305317	41311135	Similar to Hexokinase
Os01g0940600	BRADI_2g60445v3	-1.21		sen-									Zm00001d011887	-1.58		sen-	1	41343327	41344264	Conserved hypothetical protein
Os01g0940700	BRADI_2g43056v3		-2.11	tol-					Os01g0940700	-2.08	-1.25		Zm00001d042143	2.41	-1.97	sen+/tol-	1	41346647	41348373	Similar to Glucan endo-13-beta-glucosidase GII precursor (EC 3.2.1.39) ((1->3)- beta-glucan endohydrolase GII) ((1->3)-beta-glucanase isoenzyme GII) (Beta-13-endoglucanase GII)
Os01g0941500					HORVU3Hr1G105560		-2.51	tol-									1	41375254	41376297	Similar to Beta-13-glucanase
Os01g0942300	BRADI_2g60497v3	-2.55		sen-	HORVU3Hr1G105620		-3.14	tol-					Zm00001d042141	3.74		sen+	1	41398051	41398544	Similar to Beta glucanase precursor (EC 3.2.1.73) (Fragment)
Os01g0942900									Os01g0942900	-0.59		sen-					1	41439358	41447125	Similar to cDNA clone:J023028M23 full insert sequence
Os01g0943800									Os01g0943800	-0.55		sen-					1	41470283	41478321	Similar to cDNA clone: J100054L12 full insert sequence
Os01g0944100									Os01g0944100	1.03	0.9						1	41495711	41504742	Conserved hypothetical protein
Os01g0944700													Zm00001d042140	5.12		sen+	1	41533329	41535615	Similar to Beta-13-glucanase precursor
Os01g0944900									Os01g0944900	-2.96	-1.59	ΔLFC>1					1	41539758	41540817	Similar to Glucan endo-13-beta-D-glucosidase
Os01g0945300									Os01g0945300	-0.84		sen-					1	41554884	41559339	Amino acid/polyamine transporter I family protein
Os01g0945600					HORVU3Hr1G105870	-1.33	-3.03	ΔLFC<-1					Zm00001d042135	2.37		sen+	1	41564014	41566629	Similar to amino acid permease family protein
Os01g0948200									Os01g0948200	0.66		sen+					1	41712445	41714110	Similar to GRAS family transcription factor containing protein
Os01g0948400	BRADI_2g60730v3	3.27		sen+	HORVU3Hr1G106720	1.24	1.98										1	41718639	41721571	Similar to Pyrroline-5-carboxylate reductase (EC 1.5.1.2) (P5CR) (P5C reductase)
Os01g0948500	BRADI_2g60700v3	-0.81		sen-	HORVU3Hr1G106700		-0.58	tol-	Os01g0948500	-0.74	-0.75						1	41722524	41726196	Armadillo-like helical domain containing protein
Os01g0949060	BRADI_2g60720v3	0.85		sen+													1	41783510	41788531	Hypothetical conserved gene
Os01g0949300					HORVU3Hr1G106950		-1.14	tol-	Os01g0949300	-0.68	-1.38						1	41818382	41819282	EF-Hand type domain containing protein
Os01g0949400																	1	41822269	41825087	Phytochromobilin (PPhiB) synthase Phytochrome chromophore biosynthesis Photoperiodic respons
Os01g0949500					HORVU3Hr1G107090		-1.57	tol-	Os01g0949500	0.69		sen+					1	41826111	41827156	Similar to Calmodulin (CaM)
Os01g0949700									Os01g0949700		0.79	tol+					1	41839952	41841440	Glutathione S-transferase C-terminal domain containing protein
Os01g0949800																	1	41844012	41845305	Similar to Glutathione S-transferase GST 28 (EC 2.5.1.18) (Fragment)
Os01g0950866	BRADI_2g60800v3	-0.96		sen-	HORVU3Hr1G107290	-0.71		sen-					Zm00001d042092	-2.24		sen-	1	41867388	41869689	Similar to proline synthetase-like protein
Os01g0950900									Os01g0950900	1.18	0.81						1	41869950	41873872	Protein of unknown function DUF221 domain containing protein
Os01g0951400	BRADI_2g60926v3	1.64		sen+									Zm00001d042088	2.4		sen+	1	41892688	41896238	Similar to Uridine 5'-monophosphate synthase (UMP synthase)
Os01g0951500	BRADI_2g60920v3	-1.49		sen-													1	41896510	41898331	Cytochrome P450 family protein
Os01g0952300																	1	41925865	41932899	Similar to Ran GTPase binding / chromatin binding / zinc ion binding
Os01g0952500	BRADI_2g61000v3	-2.31		sen-									Zm00001d011849	1.25	-0.99	sen+/tol-	1	41948952	41952388	A-type response regulator Cytokinin signalin
Os01g0952600													Zm00001d042066	0.76		sen+	1	41954683	41962785	Similar to LacZ (Fragment)
Os01g0952800	BRADI_2g60970v3	-7.23	-3.59	ΔLFC>1					Os01g0952800	-1.31		sen-					1	41971444	41978093	Achaete-scute transcription factor related domain containing protein
Os01g0952900													Zm00001d042063	2.51		sen+	1	41972004	41973019	Conserved hypothetical protein
Os01g0953600	BRADI_2g61070v3	-1.06		sen-									Zm00001d042061	0.98		sen+	1	42003971	42009785	NADPH-dependent FMN reductase family protein
Os01g0954000													Zm00001d011845	1.69		sen+	1	42018073	42019444	NADPH-dependent FMN reductase family protein
Os01g0954500													Zm00001d011843	2.45		sen+	1	42037177	42039335	Protein of unknown function DUF702 family protein
Os01g0955000	BRADI_2g61140v3	2.39		sen+					Os01g0955000	1.39		sen+					1	42063261	42067784	Phosphoesterase family protein
Os01g0955100									Os01g0955100	-2.69	-2.45						1	42074192	42074866	Similar to Calmodulin-like protein (Fragment)
Os01g0955600																	1	42084169	42085061	Conserved hypothetical protein
Os01g0955700	BRADI_2g61190v3	2.45		sen+													1	42086484	42095424	CRT-like transporter Glutathione homeostasis Arsenic toleranc
Os01g0956075																	1	42122517	42123788	Armadillo-like helical domain containing protein
Os01g0957000	BRADI_2g61240v3	0.9		sen+									Zm00001d042052	1		sen+	1	42177836	42183724	ATP-NAD kinase PpnK-type all-beta domain containing protein
Os01g0957200									Os01g0957200	-1.44	-1.18		Zm00001d042050	-3.34		sen-	1	42190489	42193879	Protein of unknown function DUF3411 domain containing protein
Os01g0957600	BRADI_3g36680v3	-2.74		sen-									Zm00001d042047	6.17		sen+	1	42207009	42208510	Similar to cDNA clone: J053023H06 full insert sequence
Os01g0957900	BRADI_2g61300v3	1.19		sen+													1	42216976	42228068	Armadillo-type fold domain containing protein
Os01g0958100	BRADI_2g61320v3	-1.2	0.62	sen-/tol+									Zm00001d042044	-1.92		sen-	1	42234585	42237456	Similar to chloroplast SRP receptor cpFtsY precursor
Os01g0958500													Zm00001d042042	1.09		sen+	1	42247885	42255249	Similar to RNA binding protein-like
Os01g0958700													Zm00001d011831	0.95		sen+	1	42260316	42264854	Membrane attack complex component/perforin/complement C9 family protein
Os01g0958900													Zm00001d011829	-1.21		sen-	1	42268902	42274913	Similar to MLH1 protein (Fragment)
Os01g0959000													Zm00001d042040	-0.65		sen-	1	42275543	42280544	Nucleotide-binding alpha-beta plait domain containing protein
Os01g0959100					HORVU3Hr1G112050	4.66		sen+									1	42281274	42281973	Similar to Abscisic stress ripening protein 1
Os01g0959750									Os01g0959750	-1.63	-1.16						1	42301803	42302292	Conserved hypothetical protein
Os01g0959900	BRADI_2g61410v3	-1.3		sen-									Zm00001d011826	-1.67		sen-	1	42312149	42313573	Similar to predicted protein
Os01g0960300	BRADI_2g61436v3	-0.66		sen-													1	42329287	42335754	Similar to Glucose inhibited division protein A
Os01g0960400									Os01g0960400	-1.12	-0.76						1	42336297	42348672	Protein kinase core domain containing protein
Os01g0961000									Os01g0961000	0.85		sen+	Zm00001d042030	-2.55		sen-	1	42369770	42370365	Conserved hypothetical protein
Os01g0961200									Os01g0961200	0.55		sen+					1	42377194	42381519	Cystathionine beta-synthase core domain containing protein
Os01g0962100	BRADI_2g61490v3	2.13		sen+													1	42411799	42413498	Conserved hypothetical protein
Os01g0962200	BRADI_2g61534v3	0.66		sen+													1	42413471	42416572	Similar to Membrane protein
Os01g0962400													Zm00001d042025	1		sen+	1	42419408	42421376	Ubiquitin-like Ufm1 domain containing protein
Os01g0962500	BRADI_2g61550v3	1.08		sen+													1	42421672	42424864	Zinc finger HIT-type domain containing protein
Os01g0962600													Zm00001d011816	-0.98		sen-	1	42425152	42427345	Similar to 40S ribosomal protein S10-1
Os01g0962700									Os01g0962700	-2.04	-2.36		Zm00001d042022	2		sen+	1	42429502	42432547	Similar to Peroxidase 12 precursor (EC 1.11.1.7) (Atperox P12) (PRXR6) (ATP4a)
Os01g0963400	BRADI_2g61580v3	-0.96		sen-													1	42451284	42454309	Thioredoxin family protein
Os01g0963600													Zm00001d011813	-2.53		sen-	1	42460555	42461946	ABA/WDS induced protein family protein
Os01g0964133									Os01g0964133	0.74	0.74						1	42484125	42487406	Similar to Actin
Os01g0964900	BRADI_2g61677v3	-0.86		sen-													1	42547600	42548935	Similar to Mitochondrial carrier protein-like
Os01g0965000	BRADI_2g61683v3	-0.96		sen-													1	42549567	42556862	Similar to DNA-directed RNA polymerase
Os01g0965400					HORVU3Hr1G112590		0.78	tol+					Zm00001d011803	-0.97		sen-	1	42562823	42566993	Chloroplast-targeted UMP kinase Regulation of leaf colou
Os01g0965500									Os01g0965500	0.91		sen+					1	42568151	42573077	Similar to SET domain protein
Os01g0965900													Zm00001d011799	0.99		sen+	1	42587307	42590270	Conserved hypothetical protein
Os01g0966000													Zm00001d029652	0.89		sen+	1	42590881	42598002	Similar to Plasma membrane H+-ATPase (EC 3.6.1.3)
Os01g0966200									Os01g0966200		-0.66	tol-	Zm00001d011797	-0.77		sen-	1	42613788	42614622	Protein of unknown function YGGT family protein
Os01g0966300	BRADI_2g61800v3	-0.82		sen-													1	42614814	42618231	Similar to Mitochondrial processing peptidase
Os01g0966500	BRADI_2g61820v3	-0.65		sen-													1	42621833	42624710	Similar to Vacuolar protein sorting 55 containing protein
Os01g0966700	BRADI_2g61830v3	-1.14		sen-	HORVU5Hr1G124030		1.88	tol+									1	42626321	42630366	Similar to Beta-fructofuranosidase (EC 3.2.1.26) (Fragment)
Os01g0966900													Zm00001d029645	-1.87	0.69	sen-/tol+	1	42636466	42638217	Similar to Sorbitol transporter
Os01g0967900	BRADI_2g61860v3	-0.8		sen-									Zm00001d041989	-1.01		sen-	1	42689913	42695416	Similar to predicted protein
Os01g0968000	BRADI_2g61870v3	0.88		sen+													1	42695637	42699355	Similar to antiporter/ drug transporter/ transporter
Os01g0968400													Zm00001d049129	4.42		sen+	1	42710785	42712054	Root cap family protein
Os01g0969000													Zm00001d041979	-1.18		sen-	1	42736008	42737917	Similar to Chloroplast outer envelope 24 kD protein
Os01g0969100																	1	42738765	42742174	NAD(P)-binding domain containing protein
Os01g0970500																	1	42819033	42821123	Small subunit of the transcription factor IIA on chromosome 1 Mediation of host susceptibility to diseas
Os01g0970600	BRADI_2g61960v3	-0.82		sen-									Zm00001d011790	-1.44		sen-	1	42821254	42825043	Similar to ATP binding protein
Os01g0970700																	1	42826168	42828686	Peptidase M48 Ste24p family protein
Os01g0970900					HORVU3Hr1G114240	1.6	1.81						Zm00001d011788	-4.32		sen-	1	42837595	42842605	Pentatricopeptide repeat domain containing protein
Os01g0971000									Os01g0971000	-0.42	-0.62						1	42838976	42839507	Conserved hypothetical protein
Os01g0971100	BRADI_2g61990v3	1.43		sen+	HORVU0Hr1G031970	-2.63		sen-									1	42845781	42848071	Drought induced 19 family protein
Os01g0971200									Os01g0971200	-0.9		sen-					1	42848228	42852984	Protein of unknown function DUF707 family protein
Os01g0971600													Zm00001d041962	-1.13		sen-	1	42860834	42866614	Similar to Sn-glycerol-3-phosphate dehydrogenase (Fragment)
Os01g0971700	BRADI_2g62090v3	-0.52		sen-									Zm00001d041961	-1.05		sen-	1	42870524	42872637	Streptomyces cyclase/dehydrase family protein
Os01g0971800	BRADI_2g62067v3	-1.36		sen-													1	42874273	42875515	Transcription factor with a GARP DNA-binding domain Photoperiodic control of flowering time Clock associated-componen
Os01g0971900					HORVU3Hr1G115020	0.86	1.33										1	42876576	42882963	Similar to BPM
Os01g0972000									Os01g0972000		-1.81	tol-					1	42884953	42886230	Zinc finger RING/FYVE/PHD-type domain containing protein
Os01g0973000	BRADI_2g62150v3	-1.22		sen-													1	42954163	42956626	HAD-superfamily hydrolase subfamily IA variant 3 domain containing protein
Os01g0973100									Os01g0973100	-2.54	-0.55	ΔLFC>1					1	42960110	42964990	Hypothetical conserved gene
Os01g0973150									Os01g0973150	-3.18	-0.73	ΔLFC>1					1	42960464	42964671	Hypothetical protein
Os01g0973400	BRADI_2g62280v3	-1.15	0.73	sen-/tol+									Zm00001d011780	-1.41		sen-	1	42977233	42979816	Similar to radical SAM domain-containing protein
Os01g0973500					HORVU3Hr1G115860		-1.45	tol-									1	42981239	42984988	Similar to Protein kinase APK1A chloroplast precursor (EC 2.7.1.-)
Os01g0973600					HORVU3Hr1G115940	0.84		sen+									1	43016926	43019127	Protein of unknown function DUF506 plant family protein
Os01g0974200									Os01g0974200	-0.39	-1.13						1	43047164	43047861	RicMT (Metallothionein-like protein)
Os01g0974400	BRADI_2g62400v3	1.65		sen+					Os01g0974400	-0.66		sen-					1	43063740	43065432	Zinc finger RING/FYVE/PHD-type domain containing protein
Os01g0974500	BRADI_2g62410v3	0.8		sen+													1	43066717	43070166	Pectinacetylesterase family protein
Os01g0974701													Zm00001d041949	-1.11		sen-	1	43071516	43072507	Similar to RNA-binding glycine rich protein (RGP-2)
Os01g0974800	BRADI_2g37340v3	-1.41		sen-	HORVU3Hr1G116650		-1.36	tol-									1	43072763	43076466	Similar to AtPPa4 (Arabidopsis thaliana pyrophosphorylase 4)%3B inorganic diphosphatase
Os01g0975300									Os01g0975300	-0.81	-1.23						1	43096401	43097949	MYB-related transcription factor Drought and salinity toleranc
Os01g0975900	BRADI_2g62520v3	-2.09		sen-	HORVU3Hr1G116790	-1.36	-1.5		Os01g0975900	1.25	1.22						1	43115747	43117221	Similar to Tonoplast membrane integral protein ZmTIP1-2
Os01g0976300													Zm00001d040839	1.2		sen+	1	43141847	43142667	Heavy metal transport/detoxification protein domain containing protein
Os01g0978100	BRADI_2g03800v3	-0.59		sen-													1	43232027	43238506	Similar to Cysteine synthase mitochondrial precursor (EC 2.5.1.47
Os01g0978400									Os01g0978400		-0.78	tol-					1	43244218	43245392	NAD(P)-binding domain containing protein
Os01g0978500									Os01g0978500		-0.6	tol-					1	43248497	43249469	Conserved hypothetical protein
Os02g0100100	BRADI_3g00210v3	1.27		sen+													2	3634	8377	Thioredoxin domain domain containing protein
Os02g0101000	BRADI_3g00282v3	1.72		sen+	HORVU6Hr1G001480		-1.99	tol-					Zm00001d048577	-0.83		sen-	2	50308	55886	Amino acid transporter transmembrane domain containing protein
Os02g0101500	BRADI_3g00330v3	-1.12		sen-	HORVU6Hr1G000650		-1.08	tol-	Os02g0101500	0.41		sen+	Zm00001d014919	-0.91		sen-	2	78483	82952	Peroxisomal hydroxypyruvate reductase NADH-dependent HPR Photorespiratory metabolis
Os02g0101700					HORVU6Hr1G001760		0.62	tol+									2	86724	90020	Similar to KAK (KAKTUS)%3B ubiquitin-protein ligase
Os02g0102300	BRADI_3g00377v3	1.75		sen+					Os02g0102300		-0.98	tol-					2	124645	127131	Arsenate reductase Sulfurtransferase/rhodanese-like protein Regulation of arsenic accumulatio
Os02g0102400	BRADI_3g00387v3	0.91		sen+	HORVU7Hr1G115780	1.12	0.89										2	126773	130152	Ribosomal protein S5 family protein
Os02g0102600																	2	132984	135144	Ankyrin repeat containing protein
Os02g0102900									Os02g0102900	0.84		sen+					2	158662	163728	Similar to RuBisCO subunit binding-protein beta subunit chloroplast (60 kDa chaperonin beta subunit) (CPN-60 beta) (Fragment)
Os02g0103800	BRADI_3g00660v3	-1.61		sen-									Zm00001d011833	-1.27		sen-	2	183609	185325	Leaf-type ferredoxin-NADP+-oxidoreductase Regulation of electron partitioning in the chloroplas
Os02g0103900	BRADI_1g59410v3	0.62		sen+									Zm00001d007934	-1.26		sen-	2	187508	192121	U3 small nucleolar RNA-associated protein 6 domain containing protein
Os02g0104200					HORVU6Hr1G002230		-0.55	tol-									2	205432	207453	Conserved hypothetical protein
Os02g0104500	BRADI_3g00697v3	1.96		sen+									Zm00001d054080	-2.24		sen-	2	219736	221602	MYB-like domain containing protein
Os02g0104700													Zm00001d054079	-2		sen-	2	261338	265491	Nitric oxide synthase Chloroplast ribosome biogenesis and/or translation Regulation of biosynthesis of chloroplast proteins at lower temperatur
Os02g0105000									Os02g0105000		0.54	tol+					2	274455	277289	Nucleotide-binding alpha-beta plait domain containing protein
Os02g0105200	BRADI_3g00857v3	0.59		sen+													2	287571	293885	Similar to Dihydrolipoamide S-acetyltransferase (EC 2.3.1.12)
Os02g0105500													Zm00001d014946	0.97		sen+	2	300074	302819	IQ calmodulin-binding region domain containing protein
Os02g0106100	BRADI_3g00910v3	4.02		sen+	HORVU7Hr1G001040		1.85	tol+	Os02g0106100	4.88		sen+					2	343057	346875	Similar to Fructosyltransferase
Os02g0106600	BRADI_1g15627v3	-1.23		sen-									Zm00001d014949	-0.98		sen-	2	385998	386946	Zinc finger RING/FYVE/PHD-type domain containing protein
Os02g0106800	BRADI_3g00960v3	-1.01		sen-													2	397365	403411	TMPIT-like family protein
Os02g0107200	BRADI_2g61850v3	-0.63		sen-													2	422507	424238	Similar to diphosphomevalonate decarboxylase
Os02g0107900					HORVU6Hr1G038520		-0.5	tol-									2	451471	453156	Similar to ABC transporter family cholesterol/phospholipid flippase
Os02g0109900	BRADI_3g01087v3	-0.62		sen-													2	540110	547449	Hypothetical conserved gene
Os02g0110000	BRADI_3g01100v3	-2.08		sen-													2	545700	548055	Lipase GDSL domain containing protein
Os02g0110200	BRADI_3g01110v3	-2.33		sen-									Zm00001d054067		-0.76	tol-	2	554579	556320	Fatty acid 13-hydroperoxide lyase (CYP74B) Plant defens
Os02g0110400	BRADI_3g01116v3	1.36		sen+									Zm00001d014966		-0.75	tol-	2	561897	564428	Sugar transporter conserved site domain containing protein
Os02g0110600									Os02g0110600		-1.28	tol-					2	566089	572447	Similar to protein kinase
Os02g0111600									Os02g0111600	-1.37		sen-					2	627685	630534	Serine/threonine protein kinase-related domain containing protein
Os02g0114200	BRADI_3g01320v3	1.71		sen+													2	767270	772098	Serine carboxypeptidase III precursor (EC 3.4.16.5)
Os02g0114300									Os02g0114300	1.69	1.08						2	775715	776637	Hypothetical protein
Os02g0114400	BRADI_3g01350v3	-0.92		sen-					Os02g0114400	1.39	1.3		Zm00001d014984	1.98		sen+	2	777582	778268	Similar to glycerol-3-phosphate acyltransferase 8
Os02g0114700	BRADI_3g01370v3	0.85		sen+									Zm00001d014988	-1.49		sen-	2	785945	789191	Similar to Phosphorylation regulatory protein HP-10
Os02g0115600													Zm00001d028035	-2.83		sen-	2	818981	824539	S1 RNA binding domain containing protein
Os02g0115700	BRADI_3g01470v3		0.7	tol+					Os02g0115700	-1.28	-1.86		Zm00001d054044	-1.33		sen-	2	825041	827640	Catalase isozyme A (EC 1.11.1.6) (CAT-A)
Os02g0115900	BRADI_3g01477v3	0.75		sen+					Os02g0115900	-0.93	-0.8		Zm00001d014993	1.2	-0.79	sen+/tol-	2	838743	842672	Endosperm lumenal binding protein
Os02g0116100													Zm00001d010842	-1.04		sen-	2	857835	859421	Hypothetical conserved gene
Os02g0116500																	2	870853	875665	Similar to Protochlorophyllide reductase homologue
Os02g0116600	BRADI_3g01540v3	-0.78		sen-													2	875964	878615	Helix-loop-helix DNA-binding domain containing protein
Os02g0117100	BRADI_3g01550v3	-1.28		sen-									Zm00001d015004	-1.12		sen-	2	896074	900370	4-diphosphocytidyl-2C-methyl-D-erythritol synthase conserved site domain containing protein
Os02g0117500	BRADI_3g01620v3	-0.68		sen-													2	918797	923968	Similar to Glutamate receptor 3.3 precursor (Ligand-gated ion channel 3.3)
Os02g0117600	BRADI_3g01630v3	-2.21		sen-									Zm00001d054015	-0.75		sen-	2	924542	926386	Peptidyl-prolyl cis-trans isomerase FKBP-type domain containing protein
Os02g0117700	BRADI_3g01640v3	-1.78		sen-													2	926031	929928	UDPas
Os02g0117900													Zm00001d029832	-0.8		sen-	2	934683	937786	Protein of unknown function DUF231 plant domain containing protein
Os02g0118200									Os02g0118200	-1.06	-0.63						2	950731	954690	Similar to Protein kinase APK1B chloroplast precursor (EC 2.7.1.-)
Os02g0118875	BRADI_5g22162v3	-0.56		sen-					Os02g0118875		1.02	tol+					2	991320	991828	NB-ARC domain containing protein
Os02g0119200	BRADI_3g01740v3	-0.94		sen-									Zm00001d015025		-1.28	tol-	2	1014016	1016173	Similar to Adenosine monophosphate binding protein 1 AMPBP1
Os02g0119400					HORVU6Hr1G011180		-0.62	tol-									2	1022192	1024747	Similar to Syntaxin 52 (AtSYP52)
Os02g0119800	BRADI_3g01810v3	-1.63		sen-	HORVU6Hr1G013020		-0.77	tol-									2	1040541	1045783	Similar to Aminoalcoholphosphotransferase
Os02g0120000	BRADI_3g01770v3	-1.27		sen-					Os02g0120000		-0.53	tol-	Zm00001d002187	-0.89		sen-	2	1047669	1050120	Pentatricopeptide repeat domain containing protein
Os02g0120100													Zm00001d015032	1.24		sen+	2	1050786	1056830	Serine/threonine/tyrosine protein kinase STY kinase Regulation of ammonium uptak
Os02g0120600	BRADI_3g01920v3	-1.76		sen-													2	1078475	1079650	Similar to Ubiquitin-conjugating enzyme E2-17 kDa 9 (EC 6.3.2.19) (Ubiquitin- protein ligase 9) (Ubiquitin carrier protein 9) (UBCAT4B)
Os02g0120800	BRADI_3g01930v3	-0.64		sen-													2	1080513	1084282	Similar to Small GTP-binding protein (Fragment)
Os02g0121000													Zm00001d053901	-0.77		sen-	2	1090428	1095969	Similar to Glutamyl-tRNA synthetase (EC 6.1.1.17) (Glutamate--tRNA ligase) (GluRS)
Os02g0121100									Os02g0121100	-0.53	-0.77						2	1103076	1104294	Zinc finger CCHC-type domain containing protein
Os02g0121300									Os02g0121300		-0.39	tol-	Zm00001d016661	3.03		sen+	2	1116066	1116952	Cyclophilin Peptidyl-prolyl cis-trans isomerase Auxin signal transduction Lateral root initiation Stress toleranc
Os02g0121500	BRADI_3g02067v3	-1.37		sen-					Os02g0121500	-0.66		sen-	Zm00001d053911	-2.03		sen-	2	1126062	1132613	Conserved hypothetical protein
Os02g0121700					HORVU6Hr1G012270		-2.31	tol-									2	1145837	1151052	Terpenoid synthase domain containing protein
Os02g0122200	BRADI_3g02170v3	-1.86		sen-													2	1166453	1173452	Similar to predicted protein
Os02g0122300	BRADI_3g02180v3	0.54		sen+													2	1173896	1177017	Translation initiation factor eIF3 subunit domain containing protein
Os02g0122500	BRADI_3g02200v3	0.69	1.59										Zm00001d053925	-2.64		sen-	2	1185129	1186387	Conserved hypothetical protein
Os02g0122600									Os02g0122600	-0.88	-0.73						2	1187089	1187904	EF-Hand type domain containing protein
Os02g0122800									Os02g0122800	-0.86	-0.51						2	1193388	1197056	Similar to Arginine/serine-rich splicing factor
Os02g0122900	BRADI_3g02232v3	-0.96		sen-													2	1199296	1202290	Similar to Dimethyladenosine transferase
Os02g0123100	BRADI_3g02270v3	-1.31		sen-													2	1207635	1211101	Similar to cDNA clone:J033034K16 full insert sequence
Os02g0123400																	2	1223588	1226876	Hypothetical conserved gene
Os02g0124700																	2	1283277	1288182	Clathrin heavy chain/VPS 7-fold repeat domain containing protein
Os02g0125000													Zm00001d015085	-2.1		sen-	2	1302273	1304317	Similar to LPA2 (low psii accumulation2)
Os02g0125100	BRADI_3g02487v3	-0.74	0.75	sen-/tol+													2	1304905	1309799	Homoaconitase/3-isopropylmalate dehydratase small/large subunit domain containing protein
Os02g0125200													Zm00001d015090	-2.08		sen-	2	1313881	1318611	Similar to DNA-binding protein
Os02g0125300																	2	1326923	1330305	Bax inhibitor-1 (BI-1
Os02g0125566									Os02g0125566	1.15		sen+					2	1341984	1343904	Hypothetical protein
Os02g0125700	BRADI_3g02570v3	-1.34	0.64	sen-/tol+					Os02g0125700	0.81		sen+	Zm00001d015095	-1.73		sen-	2	1344678	1347023	Similar to lil3 protein
Os02g0126400					HORVU6Hr1G014700		-0.78	tol-	Os02g0126400	-1.86	-1.08						2	1387873	1394276	Calcium-dependent protein kinase Positive regulator of the salt and drought stress response
Os02g0127700	BRADI_3g02680v3	0.72		sen+													2	1437441	1441181	Similar to Ribose-phosphate pyrophosphokinase
Os02g0128000					HORVU6Hr1G015130	-1.16		sen-									2	1450233	1450766	Similar to Cytosolic class I small heat shock protein 6 (Fragment)
Os02g0128100																	2	1453367	1456346	Hypothetical conserved gene
Os02g0128200	BRADI_3g02730v3	-2.34		sen-					Os02g0128200		-0.72	tol-	Zm00001d015118	-0.87		sen-	2	1457228	1461428	Similar to Transcription factor HBP-1a (Histone-specific transcription factor HBP1)
Os02g0128600	BRADI_3g02760v3	0.95		sen+									Zm00001d015121	1.17		sen+	2	1476346	1480233	Similar to ADP-ribosylation factor-like protein
Os02g0128800					HORVU6Hr1G016120	-0.67		sen-									2	1481240	1485111	TRAF-type domain containing protein
Os02g0129300									Os02g0129300	-0.4	-0.47						2	1532451	1535776	Conserved hypothetical protein
Os02g0129700									Os02g0129700	-0.59		sen-					2	1551553	1553359	Hypothetical protein
Os02g0129800	BRADI_3g02810v3	-2.62		sen-					Os02g0129800	-1.15	-0.82		Zm00001d015126	-2.8	-1.44	ΔLFC>1	2	1558563	1559143	Conserved hypothetical protein
Os02g0129900	BRADI_3g02817v3	-1.55		sen-									Zm00001d053978	-2.52		sen-	2	1560757	1563229	Similar to hydrolase acting on ester bonds
Os02g0130000	BRADI_3g02830v3	1.12		sen+													2	1563426	1565446	Similar to SWIb domain-containing protein (Fragment)
Os02g0130100					HORVU6Hr1G015450		-0.97	tol-									2	1566154	1569479	SNO glutamine amidotransferase family protein
Os02g0130200	BRADI_3g02850v3	2.11		sen+													2	1570152	1574900	Pectin lyase fold/virulence factor domain containing protein
Os02g0130300													Zm00001d015130	0.82		sen+	2	1575453	1579224	Hypothetical conserved gene
Os02g0130900	BRADI_3g02932v3	1.15		sen+													2	1603372	1607211	Ubiquitin-conjugating enzyme E2C-binding protein domain containing protein
Os02g0132500	BRADI_3g02980v3	-1.82		sen-					Os02g0132500	-0.77		sen-	Zm00001d015153	-1.9		sen-	2	1695640	1697142	Similar to Common plant regulatory factor 7
Os02g0132600																	2	1708916	1717974	Conserved hypothetical protein
Os02g0133900	BRADI_3g03050v3	0.64		sen+													2	1788746	1792353	Protein of unknown function DUF829 eukaryotic family protein
Os02g0134000									Os02g0134000	-0.93		sen-	Zm00001d015182	2.09		sen+	2	1793875	1796979	Similar to bifunctional coenzyme A synthase
Os02g0134300									Os02g0134300	0.67	1.07						2	1816334	1819090	Protein of unknown function DUF701 zinc-binding putative family protein
Os02g0134400	BRADI_3g03080v3	-1.57		sen-	HORVU6Hr1G017860		-2.03	tol-					Zm00001d015183		-0.79	tol-	2	1821869	1826372	Fumarate reductase/succinate dehydrogenase flavoprotein C-terminal domain containing protein
Os02g0135200									Os02g0135200	-1.19		sen-	Zm00001d053997	1.25		sen+	2	1850981	1858243	Similar to Mitogen-activated protein kinase 13
Os02g0135500	BRADI_3g03120v3	0.96		sen+													2	1872692	1874820	Similar to glycosyltransferase
Os02g0135700	BRADI_3g03140v3	0.53		sen+													2	1882715	1888893	DNA polymerase V family protein
Os02g0135850	BRADI_3g03150v3	-0.98		sen-					Os02g0135850		-1.49	tol-					2	1907249	1907863	Hypothetical conserved gene
Os02g0135900	BRADI_3g03160v3	-1.4		sen-					Os02g0135900	0.44	0.45						2	1909010	1912796	Similar to 5'-AMP-activated protein kinase beta-1 subunit-related
Os02g0136000													Zm00001d015201	2.36	-2.47	sen+/tol-	2	1913422	1916137	Phox/Bem1p domain containing protein
Os02g0136150									Os02g0136150	1.24		sen+					2	1928657	1929365	Hypothetical gene
Os02g0137200	BRADI_3g03270v3	-1.73		sen-					Os02g0137200	0.47		sen+					2	1972939	1974762	Similar to 50S ribosomal protein L3-1 chloroplast precursor
Os02g0137400																	2	1979693	1983583	Similar to Spliceosomal-like protein
Os02g0137500	BRADI_3g03330v3	-0.65		sen-													2	1991843	1997302	Similar to histone acetyltransferase
Os02g0137600	BRADI_3g03340v3	-1.03		sen-									Zm00001d015210	-1.18		sen-	2	1998224	2000826	Bacterial methyltransferase family protein
Os02g0137700									Os02g0137700	0.68	0.6						2	2001887	2005864	NAD(P)-binding domain containing protein
Os02g0138100													Zm00001d015215	-1.76		sen-	2	2036165	2036874	Conserved hypothetical protein
Os02g0138500	BRADI_4g32980v3	2.92		sen+													2	2050853	2056023	GDP-fucose protein O-fucosyltransferase domain containing protein
Os02g0139000																	2	2075629	2079136	Transcription factor Regulation of Pi signaling and homeostasis Tolerance to low-Pi stres
Os02g0139100									Os02g0139100	0.86		sen+					2	2082561	2085271	Activator of Hsp90 ATPase N-terminal domain containing protein
Os02g0139400													Zm00001d015233	-1.62		sen-	2	2106368	2110510	Similar to Squamosa promoter-binding-like protein 3
Os02g0139700													Zm00001d015234		0.65	tol+	2	2128429	2137095	Similar to Cycloartenol synthase
Os02g0140500									Os02g0140500	1.11	1.42						2	2177575	2178755	Similar to cycloartenol synthase
Os02g0140800	BRADI_3g03450v3	2.17		sen+					Os02g0140800	2.36		sen+					2	2192036	2193602	Conserved hypothetical protein
Os02g0141000																	2	2205767	2207522	Butirosin biosynthesis BtrG-like domain containing protein
Os02g0141100					HORVU6Hr1G020330		0.96	tol+									2	2207998	2214514	Similar to Auxin response factor 5
Os02g0141300					HORVU6Hr1G020380		1.13	tol+					Zm00001d053886	1.73		sen+	2	2231145	2239224	Arabinokinase-Like Protein Pollen developmen
Os02g0143100	BRADI_1g55300v3	-0.59		sen-													2	2388400	2394345	Similar to Sucrose-phosphatase (EC 3.1.3.24)
Os02g0148000	BRADI_3g03770v3	-1.13		sen-									Zm00001d015268	-4.2		sen-	2	2638443	2642064	CCT domain containing protein
Os02g0148500	BRADI_3g03800v3	0.55		sen+													2	2664442	2668161	Similar to TIMING OF CAB 1 (Fragment)
Os02g0148600																	2	2668556	2671036	Similar to 4/1 protein
Os02g0149800					HORVU6Hr1G021750		-0.68	tol-									2	2744296	2747428	Stress-responsive NAC1-regulated protein phosphatase Drought and oxidative stress toleranc
Os02g0150700	BRADI_3g04020v3	0.61		sen+									Zm00001d015289	1.64		sen+	2	2791281	2795406	Zinc finger RING-type domain containing protein
Os02g0150800	BRADI_3g04040v3	-0.95		sen-													2	2798816	2803581	F-box protein with a LOV domain and consecutive Kelch repeats Circadian clock associated-componen
Os02g0150900	BRADI_3g04050v3	0.84		sen+	HORVU6Hr1G022340		-0.68	tol-	Os02g0150900		0.52	tol+					2	2804376	2807635	Protein of unknown function DUF1644 family protein
Os02g0151100					HORVU6Hr1G022280		1.82	tol+	Os02g0151100		0.76	tol+					2	2816624	2824133	Hypothetical conserved gene
Os02g0151400													Zm00001d035829	-1.47		sen-	2	2838179	2842311	Conserved hypothetical protein
Os02g0152200									Os02g0152200	-0.72		sen-					2	2865058	2869031	Protein of unknown function DUF1677 Oryza sativa family protein
Os02g0152500	BRADI_3g04140v3	-1.76		sen-					Os02g0152500	-0.56		sen-	Zm00001d015293	0.92		sen+	2	2876559	2882177	Chromatin remodeling factor Protein containing PHD domain FNIII domain and VID domain Positive regulator of flowering Regulation of leaf angl
Os02g0152600													Zm00001d053873	-2.16		sen-	2	2898897	2903751	Protein of unknown function DUF2343 domain containing protein
Os02g0152900	BRADI_3g04154v3	-1.26		sen-					Os02g0152900		-0.5	tol-	Zm00001d053868	-1.28		sen-	2	2922461	2925073	Nucleus-encoded chloroplast protein Chloroplast development Biogenesis of chloroplast ATP synthas
Os02g0153000	BRADI_3g04170v3	-0.98		sen-													2	2928922	2932167	Protein of unknown function DUF547 domain containing protein
Os02g0153400	BRADI_3g04187v3	-1.59		sen-									Zm00001d015298		-1.35	tol-	2	2945512	2948974	Leucine-rich repeat receptor-like kinas
Os02g0153500	BRADI_3g04290v3	-1.01		sen-													2	2952436	2955585	Leucine-rich repeat receptor-like kinas
Os02g0153900									Os02g0153900	-1.38	-1.05						2	2965242	2968614	Leucine-rich repeat receptor-like kinas
Os02g0154200									Os02g0154200	-1.52		sen-					2	2978855	2982356	Leucine-rich repeat receptor kinase Regulation of grain yiel
Os02g0156400	BRADI_3g04176v3	-2.8		sen-	HORVU6Hr1G024660	1.29	1.15										2	3092570	3095103	Leucine-rich repeat N-terminal domain containing protein
Os02g0156600									Os02g0156600	-1.68		sen-					2	3097247	3099450	Hypothetical conserved gene
Os02g0158300													Zm00001d015306		0.65	tol+	2	3179485	3182746	Sugar isomerase (SIS) domain containing protein
Os02g0158400	BRADI_3g04450v3	1.15		sen+													2	3182926	3187016	ssDNA-binding transcriptional regulator family protein
Os02g0158500																	2	3187973	3190043	Uncharacterized plant-specific domain 01627 containing protein
Os02g0158600																	2	3191322	3194133	Conserved hypothetical protein
Os02g0158800	BRADI_3g04480v3	0.71		sen+													2	3197174	3203105	Protein of unknown function DUF246 plant family protein
Os02g0158900	BRADI_3g04490v3	5.05		sen+													2	3204086	3206332	Similar to SNF4
Os02g0159200					HORVU6Hr1G025460		-1.26	tol-									2	3212392	3216619	Protein of unknown function DUF292 eukaryotic domain containing protein
Os02g0160200													Zm00001d015319		0.63	tol+	2	3254925	3256897	Cyclin-like F-box domain containing protein
Os02g0161000																	2	3283264	3286366	Similar to Serine/threonine protein kinase-like protein
Os02g0162000	BRADI_3g04754v3	1.73		sen+													2	3344787	3347407	Cytochrome c oxidase subunit VIIa domain containing protein
Os02g0162600									Os02g0162600	1.85	1.41						2	3362047	3362944	Conserved hypothetical protein
Os02g0164800													Zm00001d053822	0.96		sen+	2	3473348	3474123	Zinc finger C2H2-type domain containing protein
Os02g0165100	BRADI_3g04940v3	1.36		sen+	HORVU0Hr1G015530		-0.6	tol-	Os02g0165100	-1.2		sen-					2	3504423	3508658	Protein kinase core domain containing protein
Os02g0166200									Os02g0166200	-0.44		sen-					2	3557488	3560496	Non-protein coding transcript
Os02g0167000	BRADI_3g04970v3	0.82		sen+													2	3607122	3609843	Similar to holocarboxylase synthetase 1
Os02g0167100	BRADI_3g04981v3	-1.68		sen-	HORVU6Hr1G027360		-0.79	tol-									2	3610970	3613988	Similar to 3-mercaptopyruvate sulfurtransferase precursor (EC 2.8.1.1)
Os02g0167200					HORVU6Hr1G027560	1.4	1.41										2	3614133	3616333	Pentatricopeptide repeat domain containing protein
Os02g0167300													Zm00001d015348	-1.11		sen-	2	3619840	3622862	Tubulin beta-3 chain (Beta-3 tubulin)
Os02g0167500																	2	3623786	3631539	RNA recognition motif domain domain containing protein
Os02g0167600									Os02g0167600	-1.06	-1.57						2	3655252	3656179	Hypothetical gene
Os02g0168100	BRADI_3g05060v3	0.95		sen+					Os02g0168100	1.35	0.87		Zm00001d015356	1.84		sen+	2	3677525	3679266	Similar to 4-hydroxyphenylpyruvate dioxygenase
Os02g0168400																	2	3696212	3699700	Hypothetical conserved gene
Os02g0168600													Zm00001d015364	0.73		sen+	2	3705886	3709904	Ovarian tumour otubain domain containing protein
Os02g0168800	BRADI_3g05160v3	-0.86		sen-									Zm00001d015366	-1.63		sen-	2	3715361	3718262	Similar to Porphobilinogen deaminase (Fragment)
Os02g0168900																	2	3718362	3720114	Ribonuclease H2 subunit C domain containing protein
Os02g0169000	BRADI_3g05210v3	-0.56		sen-									Zm00001d015374	-1.85		sen-	2	3720874	3724570	Similar to T6H22.2 protein
Os02g0169400									Os02g0169400		-1	tol-					2	3748511	3755492	Similar to Argonaute 4 protein
Os02g0169900	BRADI_3g05226v3	-1.19		sen-									Zm00001d053801	-0.96		sen-	2	3792694	3796762	Inositol monophosphatase family protein
Os02g0170000	BRADI_3g05233v3	-1.73		sen-					Os02g0170000		-0.49	tol-	Zm00001d015377	-1.34		sen-	2	3797629	3800883	Conserved hypothetical protein
Os02g0170100																	2	3827878	3830121	Glycine cleavage H-protein family protein
Os02g0170900									Os02g0170900		1.1	tol+					2	3855966	3863872	Conserved hypothetical protein
Os02g0171100																	2	3868115	3872945	Similar to Glyceraldehyde-3-phosphate dehydrogenase (EC 1.2.1.12) (GAPDH)
Os02g0173100	BRADI_3g05400v3	-1.27		sen-					Os02g0173100	-0.46	-0.82		Zm00001d053782	-2.41		sen-	2	3995980	4002696	Similar to cytochrome P450
Os02g0173200					HORVU6Hr1G031640		-1.74	tol-	Os02g0173200	-2.11	-2.16						2	4008991	4010136	VQ domain containing protein
Os02g0173500																	2	4024691	4028669	Similar to Cholinephosphate cytidylyltransferase
Os02g0173700	BRADI_3g05437v3	-1.76		sen-													2	4035328	4038406	Similar to RNA binding
Os02g0173800	BRADI_3g05450v3	0.67		sen+					Os02g0173800	-0.9		sen-	Zm00001d053778	1.14		sen+	2	4038445	4042357	Protein of unknown function DUF284 transmembrane eukaryotic family protein
Os02g0173900	BRADI_3g05490v3	1.2		sen+	HORVU6Hr1G031480		0.61	tol+	Os02g0173900		0.44	tol+					2	4044609	4052188	Similar to SSADH
Os02g0174300									Os02g0174300	0.67		sen+					2	4083023	4085633	Hypothetical conserved gene
Os02g0174800	BRADI_3g05560v3	1.1		sen+									Zm00001d015420	-1.91		sen-	2	4095841	4097972	Protein of unknown function DUF581 family protein
Os02g0175000					HORVU6Hr1G031360	-0.77		sen-									2	4103387	4105657	Ion transporter Na+ transpor
Os02g0175100																	2	4109810	4112679	Similar to RISBZ4
Os02g0175600									Os02g0175600		-0.61	tol-	Zm00001d022124	-0.95		sen-	2	4134903	4135628	Similar to 60S ribosomal protein L27a (Fragment)
Os02g0175700													Zm00001d015430	1.49		sen+	2	4135897	4140382	Epsin-like N-terminal domain containing protein
Os02g0176000									Os02g0176000	1.22		sen+					2	4150302	4150970	Zinc finger B-box domain containing protein
Os02g0176100					HORVU6Hr1G030880		0.96	tol+	Os02g0176100	-0.6		sen-					2	4165207	4175212	Similar to predicted protein
Os02g0176900													Zm00001d053757	2.28		sen+	2	4220950	4223647	Similar to apospory-associated protein C
Os02g0177600	BRADI_3g05750v3	0.71		sen+	HORVU6Hr1G030390		-1.12	tol-	Os02g0177600		1.28	tol+					2	4280502	4285929	4-coumarate:coenzyme A ligase Lignin biosynthesis Defense against woundin
Os02g0177700									Os02g0177700		-0.78	tol-					2	4286999	4288829	Uncharacterised protein family UPF0497 trans-membrane plant subgroup domain containing protein
Os02g0177800	BRADI_3g05760v3	-1.49		sen-													2	4293248	4299059	Similar to calmodulin binding protein
Os02g0177900	BRADI_3g05767v3	-2.23		sen-													2	4304103	4309655	Carbohydrate kinase FGGY domain containing protein
Os02g0178000	BRADI_3g05790v3	-1.82		sen-													2	4306895	4309939	Similar to SNF1 related protein kinase-like protein
Os02g0178100	BRADI_3g05800v3	-1.65		sen-													2	4315391	4316956	Similar to CONSTANS-like protein CO6
Os02g0178400	BRADI_3g05820v3	1.36		sen+					Os02g0178400	-0.66	-0.46		Zm00001d053731	1.03		sen+	2	4332272	4334355	Protein transport protein SEC61 gamma subunit
Os02g0178500																	2	4334610	4338102	Similar to DEM2
Os02g0178600									Os02g0178600	1.64		sen+					2	4341415	4341927	Similar to E3 ubiquitin ligase EL5 (EC 6.3.2.-)
Os02g0178800	BRADI_3g05880v3	-1.6		sen-													2	4355073	4362388	Glossy1(GL1) homolog Cuticular wax biosynthesis Drought resistanc
Os02g0179000	BRADI_3g05890v3	-1.56		sen-													2	4376788	4381767	Similar to STE20/SPS1-related proline-alanine-rich protein kinase
Os02g0179100													Zm00001d015484	-1.83		sen-	2	4384188	4387935	Metal-dependent phosphohydrolase HD region domain containing protein
Os02g0179200					HORVU6Hr1G029750	4.07	1.56	ΔLFC<-1									2	4390150	4393564	Glutamine amidotransferase class-I domain containing protein
Os02g0179500	BRADI_3g05940v3	0.96		sen+									Zm00001d015490	-2.3		sen-	2	4423146	4424225	Hly-III related domain containing protein
Os02g0179600					HORVU6Hr1G029540	2.33		sen+					Zm00001d053740	3.39		sen+	2	4424449	4426620	Uncharacterized conserved protein UCP015417 vWA domain containing protein
Os02g0179800	BRADI_3g05970v3	-0.58		sen-									Zm00001d015575	2.11		sen+	2	4432918	4438267	Integrase N-terminal zinc-binding domain domain containing protein
Os02g0180000	BRADI_3g05990v3	-1.26		sen-					Os02g0180000	-0.84	-0.99		Zm00001d015504		-1.09	tol-	2	4450273	4454802	Similar to Protein phosphatase type-2C
[truncated: 9,782 more rows]

## Sheet: Table S5
B. dystachion						H. vulgare					O. sativa					Z. mays					O. sativa genome position				Rice Senescence Associated Genes (data from Lee et al. 2017 DOI:10.1038/s41598-017-07035-9)
	geneID	logFC_sen	logFC_tol	Class		geneID	logFC_sen	logFC_tol	Class		geneID	logFC_sen	logFC_tol	Class		geneID	logFC_sen	logFC_tol	Class	Rice ortholog	chr	start	stop	O. sativa gene description
Bd_1	BRADI_2g00950v3	-1.85	0.54	sen-/tol+	Hd_1	HORVU3Hr1G000900		-1.36	tol-	Os_1	Os01g0111100	-0.64	-2.01	ΔLFC<-1	Zm_1	Zm00001d008440	-3.07		sen-	Os01g0111100	1	586445	587696	Cyclophilin-like domain containing protein	SAG
Bd_2	BRADI_2g39710v3	-1.17	0.56	sen-/tol+	Hd_2	HORVU1Hr1G002600		-1.34	tol-	Os_2	Os01g0117300	-1.27		sen-	Zm_2	Zm00001d008465	0.91		sen+	Os01g0117300	1	979238	980546	Similar to Receptor kinase LRK10	SAG
Bd_3	BRADI_2g07597v3	-2.94		sen-	Hd_3	HORVU3Hr1G031020		-1.16	tol-	Os_3	Os01g0227800	0.84		sen+	Zm_3	Zm00001d008985	2.39		sen+	Os01g0227800	1	7071481	7073788	Similar to cDNA clone: J075083L18 full insert sequence	SAG
Bd_4	BRADI_2g40900v3	-1.63		sen-	Hd_4	HORVU3Hr1G112600		0.94	tol+	Os_4	Os01g0551000	0.48		sen+	Zm_4	Zm00001d044518		0.78	tol+	Os01g0551000	1	20662993	20665013	Conserved hypothetical protein	-
Bd_5	BRADI_2g44856v3	-4.05		sen-	Hd_5	HORVU3Hr1G057090		-0.91	tol-	Os_5	Os01g0639900	0.4	-0.39	sen+/tol-	Zm_5	Zm00001d011454	-1.09		sen-	Os01g0639900	1	25696671	25705077	beta-carbonic anhydrase (EC:4.2.1.1) Carbon assimilation CO<sub>2</sub>-mediated stomatal pore respons	SAG
Bd_6	BRADI_2g49000v3	2.59		sen+	Hd_6	HORVU3Hr1G069650	2.94		sen+	Os_6	Os01g0733500	1.21		sen+	Zm_6	Zm00001d043538	-1.7		sen-	Os01g0733500	1	30589859	30592513	Similar to Dehydration-induced protein RD22-like protein 1	-
Bd_7	BRADI_2g52670v3	-0.65		sen-	Hd_7	HORVU3Hr1G078680		-1.88	tol-	Os_7	Os01g0803200		-0.43	tol-	Zm_7	Zm00001d012561	1.35		sen+	Os01g0803200	1	34033159	34034924	Cysteine proteinase inhibitor-	-
Bd_8	BRADI_3g00330v3	-1.12		sen-	Hd_8	HORVU6Hr1G000650		-1.08	tol-	Os_8	Os02g0101500	0.41		sen+	Zm_8	Zm00001d014919	-0.91		sen-	Os02g0101500	2	78483	82952	Peroxisomal hydroxypyruvate reductase NADH-dependent HPR Photorespiratory metabolis	SAG
Bd_9	BRADI_3g43137v3	0.9		sen+	Hd_9	HORVU6Hr1G012320		-1.25	tol-	Os_9	Os02g0465900	-0.5		sen-	Zm_9	Zm00001d013845	-1.34		sen-	Os02g0465900	2	15676320	15679460	ChaC-like protein family protein	-
Bd_10	BRADI_3g49260v3	1.28		sen+	Hd_10	HORVU0Hr1G016330		-0.87	tol-	Os_10	Os02g0626400	-0.88	1.61	sen-/tol+	Zm_10	Zm00001d017275		-0.9	tol-	Os02g0626400	2	24985256	24989388	Phenylalanine ammonia-lyase (EC 4.3.1.5)	SAG
Bd_11	BRADI_3g53100v3	1.04		sen+	Hd_11	HORVU6Hr1G001950	1.45		sen+	Os_11	Os02g0710900	-1.3		sen-	Zm_11	Zm00001d017809	1.11		sen+	Os02g0710900	2	29451939	29457739	Heat shock protein Hsp70 family protein	-
Bd_12	BRADI_3g59490v3	-1.6		sen-	Hd_12	HORVU6Hr1G076040		-0.77	tol-	Os_12	Os02g0744000		-0.87	tol-	Zm_12	Zm00001d018030	-1.43		sen-	Os02g0744000	2	31202228	31203685	Similar to NDF6 (NDH DEPENDENT FLOW 6)	SAG
Bd_13	BRADI_3g60160v3	2.81		sen+	Hd_13	HORVU6Hr1G083050		1.47	tol+	Os_13	Os02g0783625	-0.93		sen-	Zm_13	Zm00001d052079	1.6		sen+	Os02g0783625	2	33253386	33257355	Similar to Lysine ketoglutarate reductase/saccharopine dehydrogenase	SAG
Bd_14	BRADI_4g37555v3	-1.18		sen-	Hd_14	HORVU5Hr1G088200	-0.86		sen-	Os_14	Os02g0815700	1.97		sen+	Zm_14	Zm00001d018470	-2.09	0.65	sen-/tol+	Os02g0815700	2	34937314	34941399	Similar to D1 protease (Fragment)	-
Bd_15	BRADI_1g77580v3	0.65		sen+	Hd_15	HORVU4Hr1G088860		0.8	tol+	Os_15	Os03g0114800		-0.84	tol-	Zm_15	Zm00001d027344		-1.55	tol-	Os03g0114800	3	842577	846408	Protein of unknown function DUF791 family protein	SAG
Bd_16	BRADI_1g76470v3	-2.61	0.51	sen-/tol+	Hd_16	HORVU4Hr1G082700		-0.85	tol-	Os_16	Os03g0129300	0.66		sen+	Zm_16	Zm00001d027488	-1.94		sen-	Os03g0129300	3	1662306	1665491	Similar to Glyceraldehyde-3-phosphate dehydrogenase (EC 1.2.1.13) (Fragment)	-
Bd_17	BRADI_1g71667v3	-2.09		sen-	Hd_17	HORVU4Hr1G071730	-1.09		sen-	Os_17	Os03g0192700		0.83	tol+	Zm_17	Zm00001d045455		1.04	tol+	Os03g0192700	3	4825697	4829533	Similar to Myo-inositol-1-phosphate synthase	SAG
Bd_18	BRADI_1g68680v3	-1.41		sen-	Hd_18	HORVU4Hr1G064440		-0.69	tol-	Os_18	Os03g0238300		-0.56	tol-	Zm_18	Zm00001d047972		-1.96	tol-	Os03g0238300	3	7305284	7308499	Endonuclease/exonuclease/phosphatase domain containing protein	-
Bd_19	BRADI_1g63190v3	-1.71		sen-	Hd_19	HORVU4Hr1G050230		-0.65	tol-	Os_19	Os03g0336000	0.76		sen+	Zm_19	Zm00001d029061	-1.04		sen-	Os03g0336000	3	12444923	12447213	Pentatricopeptide repeat domain containing protein	SAG
Bd_20	BRADI_1g15290v3	-2.8		sen-	Hd_20	HORVU5Hr1G082420	-1.46		sen-	Os_20	Os03g0592500		-0.73	tol-	Zm_20	Zm00001d006592	-1.82		sen-	Os03g0592500	3	22000043	22001240	Similar to Photosystem II type II chlorophyll a/b binding protein (Fragment)	SAG
Bd_21	BRADI_1g11670v3	1.35		sen+	Hd_21	HORVU4Hr1G005920	1.05		sen+	Os_21	Os03g0700700	-0.76		sen-	Zm_21	Zm00001d013493	0.92		sen+	Os03g0700700	3	28106903	28113300	Similar to Lipoxygenase (Fragment)	SAG
Bd_22	BRADI_1g08907v3	-0.69		sen-	Hd_22	HORVU5Hr1G094400	-1.28		sen-	Os_22	Os03g0744700		0.46	tol+	Zm_22	Zm00001d033985	-2.82	1.58	sen-/tol+	Os03g0744700	3	30593512	30596056	Conserved hypothetical protein	SAG
Bd_23	BRADI_1g01880v3	-1.5		sen-	Hd_23	HORVU5Hr1G120650	-0.79		sen-	Os_23	Os03g0844900	0.46		sen+	Zm_23	Zm00001d034828	-1.9	0.63	sen-/tol+	Os03g0844900	3	35520662	35523897	Nucleic acid-binding OB-fold-like domain containing protein	SAG
Bd_24	BRADI_1g01750v3	1.94		sen+	Hd_24	HORVU5Hr1G121570		-0.7	tol-	Os_24	Os03g0849800		1.07	tol+	Zm_24	Zm00001d012850	1.73	-1	sen+/tol-	Os03g0849800	3	35753369	35757214	Nucleotide-diphospho-sugar transferase domain containing protein	-
Bd_25	BRADI_1g01800v3	-1.89		sen-	Hd_25	HORVU5Hr1G121250		0.89	tol+	Os_25	Os03g0850400	0.72	-0.88	sen+/tol-	Zm_25	Zm00001d034851		-0.97	tol-	Os03g0850400	3	35790044	35795425	Similar to Aspartokinase	SAG
Bd_26	BRADI_2g55150v3	-2.58	0.52	sen-/tol+	Hd_26	HORVU3Hr1G085270		-0.89	tol-	Os_26	Os04g0234600	0.44		sen+	Zm_26	Zm00001d042840	-1.82		sen-	Os04g0234600	4	9075141	9077888	Similar to Sedoheptulose-17-bisphosphatase	-
Bd_27	BRADI_5g08240v3	-1.77		sen-	Hd_27	HORVU2Hr1G070140		-1.36	tol-	Os_27	Os04g0390100	1.38		sen+	Zm_27	Zm00001d003945		0.82	tol+	Os04g0390100	4	19189127	19192319	Heavy metal transport/detoxification protein domain containing protein	-
Bd_28	BRADI_5g09530v3	-2.64		sen-	Hd_28	HORVU2Hr1G073370		-1.08	tol-	Os_28	Os04g0414700		-1	tol-	Zm_28	Zm00001d003767	-2.45		sen-	Os04g0414700	4	20496054	20497009	Photosystem I PsaO domain containing protein	SAG
Bd_29	BRADI_5g12330v3	-3.39		sen-	Hd_29	HORVU0Hr1G004830		-0.68	tol-	Os_29	Os04g0459500	0.49		sen+	Zm_29	Zm00001d003429	-1.88		sen-	Os04g0459500	4	22937162	22939010	Similar to H0219H12.1 protein	-
Bd_30	BRADI_5g14530v3	-0.85		sen-	Hd_30	HORVU2Hr1G085650		-0.67	tol-	Os_30	Os04g0496000	-1		sen-	Zm_30	Zm00001d025761	1.89		sen+	Os04g0496000	4	24810332	24811141	Glucose/ribitol dehydrogenase family protein	-
Bd_31	BRADI_5g15261v3	-1.84		sen-	Hd_31	HORVU2Hr1G088110		-1.19	tol-	Os_31	Os04g0508800	-0.98		sen-	Zm_31	Zm00001d025825	1.51		sen+	Os04g0508800	4	25424202	25429268	Similar to Retroelement pol polyprotein-like	-
Bd_32	BRADI_5g21930v3	1.59		sen+	Hd_32	HORVU2Hr1G104110		-0.71	tol-	Os_32	Os04g0618200	-0.98		sen-	Zm_32	Zm00001d026311	1.27		sen+	Os04g0618200	4	31403388	31407274	Similar to cDNA clone:J013046D23 full insert sequence	-
Bd_33	BRADI_2g33450v3	0.9		sen+	Hd_33	HORVU1Hr1G028030		-0.94	tol-	Os_33	Os05g0186300	0.93		sen+	Zm_33	Zm00001d037693	1.29		sen+	Os05g0186300	5	5293558	5297417	Similar to NADP-malic enzyme	SAG
Bd_34	BRADI_2g24420v3	-1.81		sen-	Hd_34	HORVU1Hr1G075120		-0.78	tol-	Os_34	Os05g0429500		-0.57	tol-	Zm_34	Zm00001d010204	-1.62		sen-	Os05g0429500	5	21078436	21079882	Similar to dienelactone hydrolase family protein	SAG
Bd_35	BRADI_2g24050v3	-1.11		sen-	Hd_35	HORVU1Hr1G074180		-1.41	tol-	Os_35	Os05g0439400		-0.58	tol-	Zm_35	Zm00001d038280	0.81		sen+	Os05g0439400	5	21525171	21526731	Similar to Arm repeat containing protein	SAG
Bd_36	BRADI_2g23580v3	-1.33		sen-	Hd_36	HORVU1Hr1G073010		-0.7	tol-	Os_36	Os05g0453300		0.58	tol+	Zm_36	Zm00001d010066	-1.49		sen-	Os05g0453300	5	22238995	22241632	Conserved hypothetical protein	SAG
Bd_37	BRADI_2g22650v3	-2.95		sen-	Hd_37	HORVU1Hr1G070640		-1.66	tol-	Os_37	Os05g0468900	-1.23		sen-	Zm_37	Zm00001d038420	2.29		sen+	Os05g0468900	5	23020500	23021600	Zinc finger RING/FYVE/PHD-type domain containing protein	SAG
Bd_38	BRADI_2g20680v3	2.15		sen+	Hd_38	HORVU1Hr1G066100	1.78		sen+	Os_38	Os05g0501700	1.3		sen+	Zm_38	Zm00001d038616	0.99	-1.01	sen+/tol-	Os05g0501700	5	24696226	24699271	Rossmann-like alpha/beta/alpha sandwich fold domain containing protein	SAG
Bd_39	BRADI_2g18640v3	0.91		sen+	Hd_39	HORVU1Hr1G080360		0.5	tol+	Os_39	Os05g0535900	1.13		sen+	Zm_39	Zm00001d011138	-1.79		sen-	Os05g0535900	5	26616540	26620854	IQ calmodulin-binding region domain containing protein	SAG
Bd_40	BRADI_1g49790v3	-2.13	-0.64	ΔLFC>1	Hd_40	HORVU7Hr1G011890	-0.8		sen-	Os_40	Os06g0129400		0.61	tol+	Zm_40	Zm00001d036020	1.58		sen+	Os06g0129400	6	1554861	1561163	Splicing variant of SPX-MFS protein	-
Bd_41	BRADI_1g42270v3	1.65		sen+	Hd_41	HORVU7Hr1G047700		0.9	tol+	Os_41	Os06g0486800		-0.47	tol-	Zm_41	Zm00001d045965		-0.75	tol-	Os06g0486800	6	16649553	16653244	Similar to Formate dehydrogenase mitochondrial precursor (EC 1.2.1.2) (NAD- dependent formate dehydrogenase) (FDH)	-
Bd_42	BRADI_1g38687v3	-0.78		sen-	Hd_42	HORVU7Hr1G079430		1.06	tol+	Os_42	Os06g0528600	0.4		sen+	Zm_42	Zm00001d046112	-0.83		sen-	Os06g0528600	6	19614314	19619657	Aminopropyl transferase	SAG
Bd_43	BRADI_1g30110v3	-0.63		sen-	Hd_43	HORVU7Hr1G116880		-0.85	tol-	Os_43	Os06g0716000	-1.05		sen-	Zm_43	Zm00001d014789	1.01		sen+	Os06g0716000	6	30408686	30414524	Protein of unknown function DUF668 family protein	-
Bd_44	BRADI_1g58350v3	-2.38		sen-	Hd_44	HORVU2Hr1G060480		-0.72	tol-	Os_44	Os07g0148900		-0.46	tol-	Zm_44	Zm00001d018797	-2.11		sen-	Os07g0148900	7	2546465	2547298	Photosystem I protein-like protein	SAG
Bd_45	BRADI_1g25937v3	-1.6		sen-	Hd_45	HORVU2Hr1G046050		-1.36	tol-	Os_45	Os07g0524900	1.62		sen+	Zm_45	Zm00001d021655		-2.32	tol-	Os07g0524900	7	20365632	20367832	Protein of unknown function DUF6 transmembrane domain containing protein	-
Bd_46	BRADI_3g13160v3	-2.55		sen-	Hd_46	HORVU7Hr1G077740		-0.84	tol-	Os_46	Os08g0104600	0.77		sen+	Zm_46	Zm00001d035001	-2.6		sen-	Os08g0104600	8	241783	242628	Ferredoxin I chloroplast precursor (Anti-disease protein 1)	-
Bd_47	BRADI_3g14790v3	-0.93		sen-	Hd_47	HORVU7Hr1G073060		-1.03	tol-	Os_47	Os08g0141300	-0.62		sen-	Zm_47	Zm00001d024661	0.74		sen+	Os08g0141300	8	2305809	2308492	PapD-like domain containing protein	-
Bd_48	BRADI_3g14800v3	2.39		sen+	Hd_48	HORVU7Hr1G073050	1.61		sen+	Os_48	Os08g0141400	-0.86		sen-	Zm_48	Zm00001d049597	1.78		sen+	Os08g0141400	8	2310032	2315261	Similar to mRNA clone: RTFL01-03-I20	SAG
Bd_49	BRADI_3g21730v3	-0.76		sen-	Hd_49	HORVU1Hr1G086450		-1.25	tol-	Os_49	Os08g0364900	-0.52		sen-	Zm_49	Zm00001d032363	1.23		sen+	Os08g0364900	8	16892349	16896395	Similar to Pirin-like protein	SAG
Bd_50	BRADI_3g37140v3	1.29		sen+	Hd_50	HORVU1Hr1G081550		-0.65	tol-	Os_50	Os08g0434300	-0.44		sen-	Zm_50	Zm00001d032187		-1.18	tol-	Os08g0434300	8	21054660	21056008	Similar to Malate dehydrogenase precursor (EC 1.1.1.37)	SAG
Bd_51	BRADI_3g38777v3	-3.39		sen-	Hd_51	HORVU2Hr1G085300		-1.08	tol-	Os_51	Os08g0485900		-0.97	tol-	Zm_51	Zm00001d001860	-1.51		sen-	Os08g0485900	8	24023544	24027173	Haloacid dehalogenase-like hydrolase domain containing protein	SAG
Bd_52	BRADI_3g39980v3	-2.82		sen-	Hd_52	HORVU7Hr1G050660		-3.55	tol-	Os_52	Os08g0508800		-2.31	tol-	Zm_52	Zm00001d031449	1.73		sen+	Os08g0508800	8	25216460	25224078	Lipoxygenase chloroplast precursor (EC 1.13.11.12)	SAG
Bd_53	BRADI_4g27450v3	-2.76	0.63	sen-/tol+	Hd_53	HORVU5Hr1G053950		2.07	tol+	Os_53	Os09g0294000	0.67		sen+	Zm_53	Zm00001d019988		-1.9	tol-	Os09g0294000	9	6995055	7009477	Similar to Bifunctional aspartokinase/homoserine dehydrogenase 2 chloroplast precursor (AK-HD 2) (AK-HSDH 2) [Includes: Aspartokinase (EC 2.7.2.4)%3B Homoserine dehydrogenase (EC 1.1.1.3)]	SAG
Bd_54	BRADI_4g27490v3	1.35		sen+	Hd_54	HORVU5Hr1G054060		-0.67	tol-	Os_54	Os09g0297000	-0.49		sen-	Zm_54	Zm00001d005539	1.19		sen+	Os09g0297000	9	7198635	7204743	Similar to Ferrochelatase	-
Bd_55	BRADI_4g30750v3	-0.99		sen-	Hd_55	HORVU5Hr1G063820		-0.65	tol-	Os_55	Os09g0426800	0.66		sen+	Zm_55	Zm00001d020557	-2.23		sen-	Os09g0426800	9	15493031	15497466	Homologue of WAX2/GL1 Synthesis of leaf cuticular wa	SAG
Bd_56	BRADI_4g31130v3	0.92		sen+	Hd_56	HORVU5Hr1G062490		-1.28	tol-	Os_56	Os09g0438000		1.46	tol+	Zm_56	Zm00001d020609		-0.68	tol-	Os09g0438000	9	16186282	16197135	Similar to RbohAOsp (Fragment)	SAG
Bd_57	BRADI_4g31140v3	-2.26		sen-	Hd_57	HORVU5Hr1G062450	-2.45		sen-	Os_57	Os09g0438100	1.99		sen+	Zm_57	Zm00001d005807	-5.96		sen-	Os09g0438100	9	16200946	16201902	Conserved hypothetical protein	SAG
Bd_58	BRADI_4g36060v3	4.54		sen+	Hd_58	HORVU5Hr1G081500	3.18		sen+	Os_58	Os09g0532000		0.88	tol+	Zm_58	Zm00001d006211	3.28		sen+	Os09g0532000	9	20868846	20871077	Senescence-inducible chloroplast protein Activation of the chlorophll-degrading pathway during leaf senescenc	SAG
Bd_59	BRADI_3g28070v3	1.26		sen+	Hd_59	HORVU1Hr1G038680	1.31		sen+	Os_59	Os10g0462900	0.77		sen+	Zm_59	Zm00001d032789	-1.21		sen-	Os10g0462900	10	17048051	17053406	Similar to mitochondrial chaperonin-60	SAG
Bd_60	BRADI_3g11060v3	-1.94	1.79	sen-/tol+	Hd_60	HORVU7Hr1G026300		-1.38	tol-	Os_60	Os10g0502400		-0.62	tol-	Zm_60	Zm00001d013915		-1.22	tol-	Os10g0502400	10	19159179	19162398	Similar to Glutamyl-tRNA reductase 2 (EC 1.2.1.70) (GluTR) (Fragment)	SAG
Bd_61	BRADI_3g30500v3	-3.2	0.55	sen-/tol+	Hd_61	HORVU6Hr1G076880		-1.53	tol-	Os_61	Os10g0516100		-0.72	tol-	Zm_61	Zm00001d023699	-2.15		sen-	Os10g0516100	10	19894753	19896794	H subunit of glycine decarboxylase complex (GDC) Photorespiratio	-
Bd_62	BRADI_3g31850v3	-2.05		sen-	Hd_62	HORVU1Hr1G049260		-2.82	tol-	Os_62	Os10g0530500	0.46		sen+	Zm_62	Zm00001d049657	-1.51		sen-	Os10g0530500	10	20622453	20623389	Similar to Glutathione-S-transferase Cla47	SAG
Bd_63	BRADI_4g42997v3	-2.14		sen-	Hd_63	HORVU5Hr1G042740		-0.95	tol-	Os_63	Os11g0145200	-1.72	-0.71	ΔLFC>1	Zm_63	Zm00001d048688	-2.65	-0.51	ΔLFC>1	Os11g0145200	11	2067852	2069428	UDP-glucuronosyl/UDP-glucosyltransferase family protein	SAG
Bd_64	BRADI_4g19457v3	0.86		sen+	Hd_64	HORVU2Hr1G109370	1.41		sen+	Os_64	Os11g0455500	-0.55		sen-	Zm_64	Zm00001d049239		-0.73	tol-	Os11g0455500	11	15420139	15422972	Similar to Adenosylhomocysteinase	SAG
Bd_65	BRADI_4g17917v3	-1.13		sen-	Hd_65	HORVU4Hr1G023390		-1.55	tol-	Os_65	Os11g0520500		-1.24	tol-	Zm_65	Zm00001d049273	1.45		sen+	Os11g0520500	11	18780521	18788731	Conserved hypothetical protein	SAG
Bd_66	BRADI_4g44390v3	2.81		sen+	Hd_66	HORVU5Hr1G046480	-2.65		sen-	Os_66	Os12g0115700	1.51		sen+	Zm_66	Zm00001d044683		-1.96	tol-	Os12g0115700	12	766441	768578	Chalcone isomerase domain containing protein	SAG
Bd_67	BRADI_4g08030v3	-1.88	0.47	sen-/tol+	Hd_67	HORVU2Hr1G036220		-0.69	tol-	Os_67	Os12g0420200	0.59		sen+	Zm_67	Zm00001d035212	-1.93		sen-	Os12g0420200	12	13103675	13106278	Chloroplast stem-loop-binding protein of 41 kDa b Chlorophyll biosynthesis and photosynthesi	-
Bd_68	BRADI_2g56037v3	1.05		sen+	Hd_68	HORVU6Hr1G000070		2.82	tol+	Os_68	Os12g0428000	1.67		sen+	Zm_68	Zm00001d054093		1.03	tol+	Os12g0428000	12	13657101	13658736	Similar to senescence-associated protein DIN1	-
Bd_69	BRADI_4g05890v3	-1.3		sen-	Hd_69	HORVU5Hr1G025950		-0.75	tol-	Os_69	Os12g0534100		-0.72	tol-	Zm_69	Zm00001d023888	-1.15		sen-	Os12g0534100	12	21238294	21239733	Conserved hypothetical protein	SAG

## Sheet: Table S6
Gene ID	Gene_index	OsSusC1	OsSusC2	OsSusC3	OsSusT1	OsSusT2	OsSusT3	OsTolC1	OsTolC2	OsTolC3	OsSusT1	OsSusT2	OsSusT3
Os01g0111100	Os_1	86.0583	49.7412	82.1993	1.0676	1.01855	2.08685	53.4488	48.1671	60.9874	0.568336	0.656835	0.541729
Os02g0626400	Os_10	166.086	213.2	147.761	218.109	253.984	256.278	195.535	210.05	310.717	269.305	444.81	438.231
Os02g0710900	Os_11	1.03055	1.31408	1.15068	2.4058	2.24409	2.22468	1.29323	0.956236	1.42525	3.56832	2.51899	2.40852
Os02g0744000	Os_12	101.093	87.1547	101.567	4.44899	4.91986	12.8155	89.6844	69.8418	68.4296	2.26271	3.3408	4.83796
Os02g0783625	Os_13	0.900044	2.16424	0.881506	272.903	268.041	159.565	3.98721	4.51116	2.48511	431.952	382.386	255.376
Os02g0815700	Os_14	16.2958	12.1583	14.7981	12.248	13.004	14.242	14.0272	15.1469	10.5764	9.53048	11.3791	9.49477
Os03g0114800	Os_15	5.49618	4.23852	3.96534	5.20211	5.40549	3.44362	3.84363	3.85562	3.25238	9.132	7.62457	6.84995
Os03g0129300	Os_16	1299.02	1064.32	1268.4	101.979	144.373	228.336	1424.78	1159.39	1388.96	39.3106	51.9678	139.267
Os03g0192700	Os_17	52.0958	45.7953	43.8465	116.853	107.321	142.46	57.4821	47.7285	54.3945	83.1641	123.302	110.425
Os03g0238300	Os_18	9.61699	10.6616	7.93223	4.93013	5.99712	6.27514	8.20384	8.82484	8.12057	4.18591	6.82244	7.8933
Os03g0336000	Os_19	9.20798	6.65473	8.06198	0.737867	1.18283	1.86617	5.53399	5.43056	7.03574	0.169411	0.193281	0.769724
Os01g0117300	Os_2	0	0.0493519	0	0.0300327	0.0405916	0.0604843	17.0213	11.018	17.5154	0.691839	0.918187	0.829024
Os03g0592500	Os_20	10924.7	8031.4	11028.8	423.318	520.604	1069.15	10568.7	8809.21	11063.8	184.098	204.05	457.797
Os03g0700700	Os_21	5.2431	6.65133	5.357	57.0897	43.5185	24.2614	5.28387	4.63181	5.99797	56.4132	70.1735	42.4961
Os03g0744700	Os_22	179.874	161.999	174.355	39.1429	48.2281	64.2414	190.601	190.436	158.257	25.3156	21.6246	34.9649
Os03g0844900	Os_23	66.9525	55.2987	70.5147	6.42661	7.30681	13.3098	71.983	72.4858	63.1657	2.61866	2.95179	5.32368
Os03g0849800	Os_24	4.20418	6.82175	5.37488	15.2869	15.6285	14.8911	5.57593	6.71595	7.08477	18.0883	21.0144	23.3305
Os03g0850400	Os_25	29.6973	36.1419	32.9694	8.04226	8.41147	10.989	35.6561	34.5131	32.3637	8.798	6.5703	7.38483
Os04g0234600	Os_26	1062.14	749.773	956.553	120.138	127.506	228.755	985.303	869.49	911.657	51.8344	60.4761	122.906
Os04g0390100	Os_27	1.31275	1.82091	1.25839	23.11	20.9176	15.9439	1.69165	2.45701	2.11067	13.8166	29.7767	20.1583
Os04g0414700	Os_28	3073.2	2189.29	2771.58	128.507	129.446	275.37	2505.32	2146.65	2455.93	77.6108	69.1474	127.277
Os04g0459500	Os_29	2939.47	2086.77	3087.65	60.5599	108.167	177.975	3159.29	2661.93	3264.69	23.4239	35.2671	104.334
Os01g0227800	Os_3	16.2558	18.5856	15.2471	6.76222	6.92958	8.16439	6.85841	5.18455	6.29155	0.588573	0.877064	1.82198
Os04g0496000	Os_30	3.47816	7.01845	3.52038	3.44594	4.13268	3.90983	3.24161	3.03282	3.94566	1.03819	2.81148	3.85176
Os04g0508800	Os_31	4.38029	5.68627	4.19512	38.9948	38.6947	23.6881	4.38246	5.81784	4.47006	64.9806	57.6777	45.8187
Os04g0618200	Os_32	8.42662	11.7983	8.16909	48.1996	47.4994	31.6696	9.91054	11.3028	10.9885	74.6964	59.6126	47.3522
Os05g0186300	Os_33	10.0427	9.72669	7.94593	16.9668	13.655	8.19309	13.2821	10.4157	14.652	22.8736	26.5567	16.6983
Os05g0429500	Os_34	103.847	88.942	100.378	7.19258	9.54378	20.5045	57.2208	55.2793	88.226	2.648	3.38223	6.06284
Os05g0439400	Os_35	47.5414	62.8635	47.3701	15.438	20.4573	22.6719	48.5395	45.1304	83.5427	6.38167	15.4802	28.0683
Os05g0453300	Os_36	8.64797	7.46911	8.59835	1.10279	2.03434	2.19094	7.84895	10.1234	6.26829	0.392339	0.335715	0.87416
Os05g0468900	Os_37	4.30638	5.63284	4.47351	3.03505	4.10211	4.53039	3.61132	4.31851	8.01426	2.70263	3.38986	5.66744
Os05g0501700	Os_38	0.767008	1.4634	1.02125	4.55596	5.19831	5.09458	1.20682	1.11869	1.75634	4.4597	6.00185	5.03229
Os05g0535900	Os_39	0.88519	1.0743	1.29022	0.755043	0.896049	0.871572	1.30026	0.890911	1.17166	0.424226	0.325959	0.349488
Os01g0551000	Os_4	19.5503	30.4628	22.7033	9.41486	11.7259	14.9259	16.2958	15.3706	22.8614	12.2588	9.23364	18.6929
Os06g0129400	Os_40	28.6737	30.1853	30.2374	46.0552	41.4922	32.3699	20.5786	23.1955	16.959	81.5903	67.5296	52.8491
Os06g0486800	Os_41	27.2477	26.7366	25.0837	82.3419	83.8177	85.5002	22.7376	25.6923	22.1682	86.7632	102.306	99.5139
Os06g0528600	Os_42	59.0069	64.1786	61.1446	56.8948	53.3134	67.0697	51.2253	58.6624	46.921	30.092	35.1093	39.4078
Os06g0716000	Os_43	10.409	12.2488	10.6735	26.6682	25.443	22.2762	11.1734	13.293	10.913	25.763	23.9881	19.5311
Os07g0148900	Os_44	3688.11	2713.89	3285.58	216.739	250.509	455.108	3349.09	2688.81	3079.36	66.3158	80.2485	194.691
Os07g0524900	Os_45	1.99807	4.10915	1.64888	4.14384	3.40389	5.86341	1.15887	1.22413	1.32579	0.969864	0.689776	1.57158
Os08g0104600	Os_46	3181.27	1902.01	3176.54	197.587	272.707	390.536	3665.52	3072.56	3939.22	128.533	109.543	279.556
Os08g0141300	Os_47	38.7353	51.9654	39.3816	53.462	57.1136	51.0324	42.1498	42.1319	44.7827	55.0225	51.8275	53.0163
Os08g0141400	Os_48	1.19561	1.85282	1.25153	27.6693	28.3858	18.9079	2.05122	1.63641	2.47092	47.3464	35.8867	27.1557
Os08g0364900	Os_49	11.4949	17.4793	9.8964	18.7967	19.2345	15.827	19.8719	25.0442	29.1852	29.826	30.2145	38.4959
Os01g0639900	Os_5	1880.17	1298.81	2122.7	48.6189	69.9938	85.3041	2102.45	1853.16	1954.45	74.0316	72.7215	77.5907
Os08g0434300	Os_50	39.3239	36.3953	38.6248	42.8974	49.5108	40.7315	30.92	27.5506	29.3569	122.661	98.5685	73.4556
Os08g0485900	Os_51	9.37022	4.82288	9.40862	0.05415	0.146376	0.130866	7.44	5.47945	3.80885	0.0891005	0.034853	0.0560533
Os08g0508800	Os_52	7.85545	14.1176	8.48045	15.8665	12.4345	7.20141	12.3573	12.0027	18.1651	18.5257	21.5704	20.4123
Os09g0294000	Os_53	157.746	150.182	172.1	6.45426	10.2214	16.0701	147.997	156.262	145.759	8.98863	9.83679	14.3276
Os09g0297000	Os_54	5.4441	6.61985	4.85867	14.6788	15.0906	12.6103	5.63663	6.4859	6.10733	20.8599	16.9924	12.69
Os09g0426800	Os_55	11.6952	9.99025	9.67138	4.94513	6.30043	8.19226	10.0455	7.89588	10.76	7.18906	9.01245	14.2499
Os09g0438000	Os_56	5.90043	7.32998	5.42346	5.46475	5.42188	7.20503	5.84484	6.38758	8.44508	5.25566	5.34257	6.0242
Os09g0438100	Os_57	42.5788	48.3331	60.8793	1.84857	4.71936	4.96389	30.9644	26.9117	49.5856	0.20278	0.330503	4.39406
Os09g0532000	Os_58	7.54263	15.8031	6.64911	225.38	247.342	161.824	9.84806	12.6749	12.638	222.26	303.226	315.238
Os10g0462900	Os_59	8.64022	8.26872	8.53862	16.1153	20.5028	22.0387	14.1284	11.692	12.8496	14.772	15.932	14.0098
Os01g0733500	Os_6	13.4324	13.7963	11.326	39.076	32.341	56.1524	7.4031	5.46206	6.30666	11.3294	14.7722	28.3816
Os10g0502400	Os_60	12.355	8.06215	11.0233	1.50819	2.23491	2.01274	11.5122	13.0396	13.7125	2.24244	2.28063	1.66152
Os10g0516100	Os_61	384.81	234.119	381.377	4.60659	6.70307	9.98804	346.203	303.307	270.429	10.5151	3.24887	6.35802
Os10g0530500	Os_62	374.742	254.339	350.041	3.0628	7.76886	13.3506	281.825	244.584	253.591	1.24265	2.29539	3.18493
Os11g0145200	Os_63	20.4794	18.7619	20.5887	6.83052	7.71578	9.63945	16.5548	17.3866	15.0234	3.8968	6.01695	5.11802
Os11g0455500	Os_64	187.752	278.754	200.884	156.43	185.378	203.391	314.89	284.359	448.483	139.23	195.281	207.432
Os11g0520500	Os_65	2.57754	3.7765	2.35203	6.6072	5.71401	4.75372	3.47188	3.11728	4.00232	8.20109	6.81041	5.94735
Os12g0115700	Os_66	31.5613	11.6634	22.5218	2.02265	3.0817	2.37004	20.5621	14.7518	10.9514	1.11947	1.62732	2.25236
Os12g0420200	Os_67	1224.31	944.909	1255.56	71.377	92.2809	159.74	1470.02	1311.28	1289.07	65.6005	60.6457	125.167
Os12g0428000	Os_68	4.7882	7.77905	5.26854	126.181	72.8812	130.763	11.5098	14.1439	13.0802	69.7876	64.5729	110.236
Os12g0534100	Os_69	1.86103	1.97394	1.17013	2.12945	2.36153	2.19928	1.71921	1.87105	1.92994	2.9199	3.25077	4.38033
Os01g0803200	Os_7	140.866	225.165	122.518	384.271	398.374	289.186	180.713	211.052	222.329	707.094	560.036	505.851
Os02g0101500	Os_8	480.518	426.31	467.389	144.739	155.416	229.357	465.337	433.964	425.181	74.7694	102.631	143.231
Os02g0465900	Os_9	68.3211	70.1548	55.6874	22.241	17.3732	25.4335	40.3642	45.2358	40.1251	17.5876	15.6686	15.2665
Os05g0536250	Os_AP2_1	1.54416	1.00238	1.28296	0.609991	0.710734	0.804872	1.28445	1.22959	0.929346	0.72682	0.575383	0.870941
Os05g0121600	Os_AP2_2	164.52	154.311	161.027	80.8778	89.5356	90.036	131.726	139.54	146.12	43.0423	63.2768	72.7261
Os11g0129700	Os_AP2_3	0.0372641	0.151812	0.0585747	0.525877	0.432222	0.50092	0.0406833	0.0572991	0.0502371	0.701594	0.617488	0.31877
Os02g0628600	Os_ARF_1	3.98231	5.2013	4.23476	0.397563	0.516671	0.55431	5.36899	4.71584	5.94521	0.402564	0.442882	0.765037
Os05g0563400	Os_ARF_10	36.8909	35.4338	37.5131	19.5784	15.7173	24.1609	27.4251	25.6433	22.9754	21.7213	9.8314	15.4077
Os08g0520550	Os_ARF_11	13.2144	13.5377	14.5325	12.9577	12.1256	14.8382	12.0662	15.147	13.3935	9.25823	11.4573	10.8614
Os02g0164900	Os_ARF_12	11.2341	12.4544	12.2131	12.6226	11.9571	10.9262	9.41652	9.30108	9.1786	13.054	14.0269	10.4888
Os05g0515400	Os_ARF_13	2.11062	2.29995	2.00566	6.11991	6.63949	4.58739	2.217	2.34184	2.00472	6.3972	6.32951	5.61851
Os12g0613700	Os_ARF_14	3.23446	3.62729	2.82172	11.0765	10.4241	9.50328	3.68258	3.25052	3.17694	10.8093	11.4957	9.38381
Os06g0702600	Os_ARF_15	3.28899	3.8063	2.94725	8.0058	7.78994	6.92275	2.37501	2.61826	2.33921	10.727	9.33774	7.34482
Os06g0196700	Os_ARF_16	1.52144	2.17494	1.73959	31.0556	30.0725	22.0088	2.04786	1.91081	1.85443	31.5783	28.6264	23.4722
Os01g0927600	Os_ARF_17	60.0127	67.4559	66.214	99.334	91.6774	95.639	66.6765	71.7744	64.847	89.6945	86.5931	71.7511
Os06g0685700	Os_ARF_2	12.5441	12.7325	11.8307	18.1957	17.0963	18.1627	11.049	11.5432	10.8314	19.1762	19.1274	18.5175
Os04g0442000	Os_ARF_3	13.415	13.3254	13.5409	2.40891	2.57438	2.45391	13.5501	12.704	12.6976	2.09708	2.6029	1.84844
Os11g0523800	Os_ARF_4	55.8855	57.523	56.5721	48.3033	42.1831	64.9458	48.6055	51.1032	45.1695	24.6794	27.253	30.644
Os01g0236300	Os_ARF_5	5.09264	4.35863	4.11687	1.99135	1.72078	3.04073	2.77217	3.42182	1.75967	0.443153	0.45963	0.549129
Os01g0753500	Os_ARF_6	4.39748	3.68324	3.64108	1.05209	0.980373	1.59243	3.8782	3.26673	2.97961	0.731169	0.79914	0.913196
Os04g0671900	Os_ARF_7	6.2551	6.08641	6.39814	3.23434	3.04592	3.29892	5.99284	6.75094	5.99266	1.76825	1.62846	1.92601
Os02g0141100	Os_ARF_8	3.4057	3.07297	4.28599	2.93173	2.51119	3.01291	3.2232	3.41687	2.79319	1.67747	1.37834	1.73802
Os02g0557200	Os_ARF_9	18.3398	19.0511	18.2714	14.8145	14.7509	14.822	18.0126	18.3009	17.2464	9.58284	11.0114	10.5401
Os01g0904700	Os_ARR.B_1	5.20373	4.92681	5.01183	4.53408	3.89586	5.82629	4.19566	5.11051	4.51783	2.78689	2.48835	2.84946
Os06g0183100	Os_ARR.B_2	4.12575	4.51885	3.68565	7.05006	5.99098	6.25987	3.74617	4.39681	3.38682	5.61436	5.77867	4.69053
Os03g0224200	Os_ARR.B_3	13.2231	14.7345	13.6851	47.4071	39.4691	34.7772	13.7132	16.1718	12.5485	65.9812	42.4905	38.0202
Os02g0796500	Os_ARR.B_4	10.4069	13.1502	10.474	40.6036	41.5982	32.1325	9.75689	12.3542	10.081	42.4624	40.935	33.4453
Os03g0120900	Os_B3_1	3.16552	3.04862	2.25732	1.47975	1.37314	2.00159	1.81228	2.00338	2.30292	0.690479	0.888459	0.876384
Os11g0197600	Os_B3_2	1.1047	1.6815	1.31474	4.40906	3.72195	5.13684	2.16804	2.3963	2.23393	2.93413	3.25674	3.12837
Os07g0679700	Os_B3_3	11.5296	13.579	12.7689	6.49397	6.8167	8.59375	12.5876	14.0971	11.4237	3.8622	5.11334	5.31631
Os10g0323000	Os_B3_4	0.688799	0.738632	0.639476	0.410492	0.438302	0.661368	0.583585	0.608174	0.562237	0.206009	0.300538	0.329314
Os03g0620400	Os_B3_5	0.751299	0.556911	0.558681	0.545553	0.737358	0.665887	0.836009	0.849764	0.715816	0.299225	0.385721	0.598955
Os03g0164300	Os_B3_6	5.52622	7.60946	5.68575	5.07778	3.7984	4.11628	4.26596	5.85805	4.0637	2.52232	2.77494	3.47112
Os07g0563300	Os_B3_7	161.322	202.716	157.176	271.01	265.214	290.077	170.304	187.409	171.898	303.731	269.393	261.358
Os03g0619600	Os_B3_8	0.142825	0.149196	0.224505	0.426722	0.539934	0.493695	0.294536	0.201314	0.208594	0.732023	0.6282	0.642218
Os02g0598200	Os_B3_9	0.193179	0.256398	0.19291	0.130024	0.166951	0.0916517	0.0496246	0.0524192	0.0689379	0.0213947	0.0104611	0.0448649
Os06g0130600	Os_BBR.BPC	4.07699	3.7424	3.51208	2.64473	2.43269	3.34746	2.94402	3.86875	3.2621	1.58658	1.72885	2.01208
Os06g0552300	Os_BES1_1	1.9978	2.2058	1.79654	3.01691	2.82019	3.15839	1.90213	2.1432	2.23137	3.10532	2.73734	2.95786
Os01g0203000	Os_BES1_2	11.3631	13.2349	11.4313	17.3721	17.0118	17.1659	8.61507	10.3742	11.9041	15.5106	15.7782	16.7303
Os02g0129600	Os_BES1_3	1.39474	1.42528	1.39713	2.19066	1.90914	2.17599	1.19169	1.20885	1.05986	1.50871	1.32386	1.29971
Os01g0105700	Os_bHLH_1	0.117663	0.184366	0	0.347802	0.485246	0.361525	0.107049	0.158308	0.138797	0.350757	0.451329	0.193563
Os03g0741100	Os_bHLH_10	4.70313	6.29821	6.88558	44.5066	32.6672	19.2815	4.71674	5.36076	6.13773	86.9271	62.7548	53.0343
Os11g0601700	Os_bHLH_11	3.475	2.72021	2.29005	17.685	16.4598	19.3495	2.34934	2.9679	2.79323	23.7888	15.5268	16.5184
Os03g0782500	Os_bHLH_12	174.347	147.529	165.357	13.0405	16.5914	20.3652	97.51	107.531	115.74	4.97592	8.21261	10.847
Os01g0928000	Os_bHLH_14	10.4128	10.9491	10.8944	3.52825	4.2735	4.29075	9.84039	11.051	9.13742	4.95703	5.72097	5.6657
Os03g0639300	Os_bHLH_15	5.5899	5.15275	5.18199	3.04207	2.63564	3.07899	5.34369	5.99052	4.67322	1.8482	2.23412	2.34156
Os04g0631600	Os_bHLH_16	2.79486	3.60157	3.38578	5.51373	5.14204	4.16413	2.91978	2.88971	2.89897	4.89915	4.96839	5.65997
Os04g0300600	Os_bHLH_17	25.2921	30.778	21.1735	25.3631	26.1058	32.0887	23.7036	27.1359	31.3771	11.343	15.3829	22.1594
Os01g0566800	Os_bHLH_18	27.9568	16.4617	27.2458	1.2066	0.417187	0.791175	12.3695	9.89851	9.81915	0.600236	0.270913	0.338881
Os01g0108500	Os_bHLH_19	12.938	32.5982	11.226	16.6463	17.2965	52.4072	13.5601	10.146	18.9538	0.541313	1.05872	2.10001
Os01g0108400	Os_bHLH_2	30.7798	79.6716	25.6363	27.4664	28.8082	68.7188	30.9419	23.2801	42.7619	0.978395	1.47198	2.95918
Os10g0556200	Os_bHLH_20	42.0797	52.1858	48.6052	5.70698	7.31229	9.70035	32.8658	30.9731	34.1695	2.27437	3.02919	6.39329
Os10g0376900	Os_bHLH_21	3.91341	5.91551	3.54611	0.658507	0.534015	0.751512	3.85362	2.65476	3.84049	0.758474	0.423841	0.605914
Os03g0379300	Os_bHLH_22	65.1108	83.7922	77.006	14.01	14.9245	21.6176	73.5858	88.7618	48.1237	17.6304	12.8997	15.6595
Os08g0524800	Os_bHLH_23	8.50704	7.12063	8.33381	1.099	0.954892	1.07505	5.42277	5.94968	4.41174	0.930004	1.01052	1.54393
Os01g0915600	Os_bHLH_24	12.0633	12.8245	12.8881	5.34633	6.08109	8.80954	12.7992	12.4283	12.9335	2.05646	2.48028	4.48011
Os09g0487900	Os_bHLH_25	27.3151	32.3582	28.1559	9.94343	10.2305	13.2472	20.5472	24.998	25.7179	3.33201	5.16853	8.55336
Os02g0221100	Os_bHLH_26	0.153413	0.275347	0.197302	0.0159581	0.0107843	0.0321388	0.243621	0.193005	0.394841	0.0393872	0.0898737	0.0825953
Os03g0728900	Os_bHLH_27	1.5401	2.57406	1.30905	1.62081	1.35262	2.27839	0.996392	1.95151	1.36495	0.232687	0.560117	0.487946
Os09g0417400	Os_bHLH_28	1.23671	1.12635	1.09348	0.375882	0.522977	0.467563	0.717289	0.891391	0.99645	0.163718	0.266837	0.362392
Os04g0489600	Os_bHLH_29	5.24574	8.55012	5.51206	3.13981	2.88792	3.07137	5.01119	6.477	6.8606	1.28824	2.0734	2.96877
Os01g0159800	Os_bHLH_3	3.01759	5.47128	2.64269	30.1629	27.8673	19.0236	5.3653	7.45715	9.1533	32.4246	35.5976	33.4868
Os09g0410700	Os_bHLH_30	2.12856	1.74217	1.84218	1.1748	0.793919	0.952165	0.956888	0.808619	1.16472	0.282888	0.253586	0.494348
Os05g0501200	Os_bHLH_31	2.24998	2.74746	2.60984	0.76939	1.21987	1.13233	2.54114	2.23686	2.01347	0.535609	0.952326	1.1487
Os07g0143200	Os_bHLH_32	15.056	19.1275	14.0029	8.74652	8.6644	9.3822	12.5624	16.079	14.1442	3.45055	6.36427	7.46482
Os08g0179400	Os_bHLH_33	0.701377	1.14923	0.888285	0.515917	0.619824	0.531059	0.787612	0.808855	1.05362	0.339564	0.27672	0.454933
Os01g0108600	Os_bHLH_34	15.1596	19.3062	15.3547	5.83061	4.64951	7.16294	13.2683	10.6365	12.1078	6.09213	5.93413	5.3817
Os06g0724800	Os_bHLH_35	2.92226	2.98282	2.59858	1.38526	2.42107	1.29872	4.23868	4.09222	5.69837	1.33618	1.61412	4.20298
Os12g0610200	Os_bHLH_36	18.9553	18.8098	16.9307	9.50177	9.87587	8.63547	12.6889	14.9342	15.7614	5.88202	8.1811	9.63444
Os09g0475400	Os_bHLH_37	6.07146	6.72839	5.59441	3.97156	3.78909	4.44499	5.16206	5.67582	5.37831	3.50015	2.95789	3.00169
Os05g0139100	Os_bHLH_38	1.54794	2.11964	1.65033	1.61718	1.27502	1.51214	0.955201	1.16422	1.97342	0.728599	0.836422	0.863583
Os02g0116600	Os_bHLH_39	38.0892	34.2046	35.9485	23.7133	23.0008	24.3156	28.0382	30.3357	26.4326	24.8904	20.4003	20.4824
Os03g0797600	Os_bHLH_4	12.8102	14.011	11.7924	6.9573	7.82682	8.21156	9.45506	10.6742	12.022	7.43938	7.52422	7.85365
Os11g0158500	Os_bHLH_40	14.4129	15.7748	14.1729	20.1136	19.9848	18.7666	11.0383	14.0698	10.72	18.3993	17.8515	15.8035
Os02g0726700	Os_bHLH_41	6.14033	8.17532	6.12587	7.91943	5.51654	6.33883	5.38625	5.81237	6.56739	12.6968	5.91412	8.68826
Os05g0103000	Os_bHLH_42	1.0532	0.676204	0.823715	0.822998	1.13221	1.03592	0.785256	0.859101	0.779192	1.6202	1.30064	1.34381
Os02g0805250	Os_bHLH_43	0.542282	0.764732	0.730631	2.14958	1.85701	2.09762	0.845772	0.848731	1.2141	1.78673	1.8899	1.72046
Os03g0231950	Os_bHLH_44	2.53485	2.76956	1.90609	3.66476	3.57585	3.15749	1.94469	2.01469	1.80102	4.67578	3.4688	3.27965
Os03g0759700	Os_bHLH_45	0.0150559	0.0707731	0.0283992	0.155046	0.104779	0.13878	0.049312	0.0868149	0.167453	0.17008	0.249485	0.222911
Os01g0900800	Os_bHLH_46	25.2422	29.1651	22.0968	30.3368	34.4245	29.5842	17.3065	20.0502	20.2739	41.5444	35.5342	43.3606
Os02g0564700	Os_bHLH_47	0.0157386	0.0887792	0.0296871	0.225108	0.255571	0.253879	0.137462	0.127053	0.0954805	0.281505	0.260799	0.233021
Os10g0575000	Os_bHLH_48	0.943454	1.158	0.716782	1.33442	1.60092	1.17765	0.429176	1.14847	0.68895	2.07235	1.59231	1.31924
Os03g0725800	Os_bHLH_49	2.16834	3.10088	2.33305	5.8183	3.99099	5.63015	1.96719	2.00753	1.76011	4.45621	4.47025	5.66712
Os09g0474100	Os_bHLH_5	0.818847	1.26167	0.965348	1.44446	1.70607	1.78214	0.744985	0.708244	0.919933	1.0278	1.31919	1.66138
Os06g0193400	Os_bHLH_50	12.0264	11.4981	11.7406	27.1471	24.9038	23.3521	12.0967	12.3413	10.9675	39.0767	28.9115	24.6177
Os09g0501600	Os_bHLH_51	1.35725	0.919914	1.3396	2.85321	2.19665	1.74568	1.37841	1.41963	0.797863	3.2388	3.54502	3.45821
Os01g0705700	Os_bHLH_52	0.374561	0.672267	0.353259	0.70132	0.447614	0.745444	0.185877	0.196345	0.241004	0.737265	0.658287	0.705805
Os08g0432800	Os_bHLH_53	0.530706	0.607403	0.587572	1.06929	1.19544	0.584899	0.35268	0.31932	0.209974	1.39018	0.552288	1.00211
Os06g0570900	Os_bHLH_54	0.174748	0.310322	0.109873	0.366579	0.285265	0.156603	0.127188	0.0671755	0.294481	0.511793	0.69711	0.536617
Os09g0519100	Os_bHLH_55	1.28589	3.24897	0.757977	10.5294	9.94329	8.42671	1.31614	2.13173	4.06304	5.67429	10.728	15.5481
Os01g0218100	Os_bHLH_56	15.5261	25.7722	10.4389	59.2989	65.5153	47.6931	13.9049	15.1425	16.9862	50.8703	80.4826	73.9605
Os09g0455300	Os_bHLH_57	3.43575	4.9733	5.14341	5.14811	3.79532	4.90125	3.09606	2.38992	3.19819	22.7431	12.4006	16.9023
Os03g0811400	Os_bHLH_58	0.350189	0.438969	0.330273	0.445219	0.541574	0.403491	0.169921	0.134617	0.19671	1.46516	0.394021	1.42101
Os02g0705500	Os_bHLH_59	2.87762	2.31888	2.83326	9.67896	10.4655	5.42887	2.72737	2.29748	2.23813	22.2371	15.5744	14.3265
Os01g0952800	Os_bHLH_6	58.8641	137.089	96.3286	2.8179	1.08818	3.15757	81.9337	95.6018	37.3694	1.98715	2.86375	3.18013
Os08g0490000	Os_bHLH_60	1.92479	2.16018	1.97416	8.8922	9.53481	6.33447	1.31338	1.58156	1.78804	16.9645	11.5176	11.5416
Os04g0301500	Os_bHLH_61	1.13814	2.05976	2.17365	3.8092	3.49829	2.52439	0.683412	1.14847	1.43847	9.93742	8.64398	11.3462
Os07g0628500	Os_bHLH_62	0.470271	0.208057	0.339167	4.14653	3.55085	2.61363	0.362415	0.31902	0.475493	4.94788	2.92862	3.35846
Os05g0541400	Os_bHLH_63	0.103721	0	0	1.42416	1.56396	2.09139	0.283094	0	0	1.22051	2.43485	4.04388
Os01g0773800	Os_bHLH_64	0.0367263	0.172639	0.207826	3.46693	2.44231	0.719379	0.32077	0.0847084	0.222805	7.19128	7.77627	9.02635
Os04g0599300	Os_bHLH_65	0.020016	0	0	0.618379	0.944131	0.830255	0	0	0.0202383	0.414539	1.51097	0.355619
Os06g0496400	Os_bHLH_66	3.28826	1.54571	2.00669	0	0	0	0	0	0	0	0	0
Os04g0618600	Os_bHLH_67	0.665341	0.573388	0.610071	0.126884	0.171494	0.298127	0.343018	0.341021	0.48586	0.191382	0.289239	0.218906
Os01g0784900	Os_bHLH_68	2.13419	1.92166	1.64427	0.877059	0.88325	0.900492	1.3455	1.38661	1.2765	0.594237	1.07921	1.12744
Os01g0865600	Os_bHLH_69	6.70585	7.55029	6.2706	6.31359	6.10406	6.88412	5.48775	7.21963	5.42887	6.40955	5.61594	5.42371
Os03g0232000	Os_bHLH_70	0.430545	0.283341	0.365453	0.81286	0.832307	0.992155	0.65807	0.595825	0.435325	0.891675	0.911616	0.722442
Os02g0603600	Os_bHLH_8	1.31913	2.06158	1.37337	0.583175	0.51664	0.424393	1.67397	2.09422	2.37309	0.548331	0.457365	0.566473
Os08g0506700	Os_bHLH_9	97.7097	99.361	87.2655	50.6751	56.6941	53.264	92.0712	107.012	94.798	35.3725	44.7756	48.7927
Os09g0456200	Os_bZIP_10	29.4242	30.7989	30.6981	23.0915	20.9334	28.1782	26.7189	28.6892	27.2302	23.6007	18.4732	25.7851
Os02g0128200	Os_bZIP_11	18.7838	17.2106	19.734	5.09541	4.65913	6.35441	14.5583	17.1058	14.2485	1.98369	2.44	3.08736
Os02g0766700	Os_bZIP_13	8.81462	11.0712	9.93382	75.5648	75.4511	64.2373	9.45566	11.6314	10.8334	144.497	97.3886	123.777
Os04g0637000	Os_bZIP_14	3.25161	2.93796	3.02191	4.77521	4.4475	4.7766	3.17856	3.4123	2.95174	4.07389	4.15871	3.89666
Os07g0644100	Os_bZIP_15	6.92522	9.20476	6.62522	26.4135	27.2828	26.3913	7.93	8.42247	9.11483	27.0138	29.7513	26.458
Os06g0601500	Os_bZIP_16	1.3571	1.32977	1.55032	0.109354	0.192141	0.154164	1.29381	1.65323	0.966314	0.107962	0.0703847	0.169797
Os02g0132500	Os_bZIP_17	72.5096	79.2155	74.2499	11.718	17.7468	16.9621	73.3729	72.6014	87.6911	4.30386	7.23913	13.2219
Os09g0306400	Os_bZIP_18	38.3301	40.8175	32.7014	66.3963	66.0132	63.163	31.9389	34.8876	29.5794	39.7135	48.4154	44.6913
Os06g0211200	Os_bZIP_2	0.976003	1.21444	1.05586	5.70704	6.73684	6.40007	0.893189	1.22488	1.53831	5.72893	5.87988	6.85683
Os01g0867300	Os_bZIP_20	7.32042	11.2359	6.96132	79.1001	78.654	72.5567	8.05836	11.4972	10.8981	83.1717	70.8351	74.6309
Os11g0152700	Os_bZIP_21	0.641472	0.790235	0.511113	0.455581	0.521681	0.458758	0.784854	0.803543	0.782787	0.114527	0.305448	0.294747
Os06g0662200	Os_bZIP_22	5.69199	6.54044	5.45775	3.32884	3.25213	3.38849	5.69641	5.83486	6.26676	3.57222	3.55154	4.61943
Os05g0411300	Os_bZIP_23	15.8271	20.7579	15.7249	33.3982	32.4551	35.0458	18.6536	18.895	19.9045	35.6652	37.594	40.2263
Os01g0801901	Os_bZIP_24	18.4123	16.8806	19.5628	1.77744	1.62512	1.89512	15.2135	15.596	12.8885	1.41933	1.00944	0.721537
Os09g0540800	Os_bZIP_25	1.30123	1.22334	0.708015	0.171797	0.232197	0.288325	1.14743	1.09661	0.961457	0.282682	0.046073	0.0493988
Os01g0808100	Os_bZIP_26	3.55037	4.94002	3.42499	2.07185	1.89822	2.25577	3.33348	4.03593	3.12825	1.44194	1.70893	1.48185
Os09g0474000	Os_bZIP_27	1.97032	2.6242	2.16798	1.31513	0.95223	0.189185	1.79259	1.98822	2.57326	0.695559	1.43597	0.810329
Os06g0614100	Os_bZIP_28	1.75782	3.19032	1.42735	1.98984	1.89714	1.99289	0.708123	1.30087	1.46369	0.539795	0.692293	0.695874
Os06g0716800	Os_bZIP_29	25.4383	27.3793	27.5886	16.4497	18.1099	19.2842	24.3161	25.8989	24.3355	15.0933	15.953	18.6762
Os01g0813100	Os_bZIP_3	4.07871	5.00623	4.16731	0.939879	0.963692	2.08868	2.41202	2.48252	2.92117	0.799921	0.834404	0.894635
Os05g0489700	Os_bZIP_30	7.0782	7.98933	5.94704	6.17586	6.70033	7.55413	6.5879	5.92348	6.81901	3.16457	4.70929	5.68811
Os05g0443900	Os_bZIP_31	2.26178	3.1502	2.34759	3.27265	3.35907	3.64018	2.2864	2.70497	2.20219	1.65604	1.80675	1.92536
Os02g0833600	Os_bZIP_32	12.8182	17.8838	10.5988	27.0234	24.9379	25.8968	12.6524	15.7949	16.5114	19.0645	21.0681	24.0332
Os08g0176900	Os_bZIP_33	3.98645	5.17741	3.48842	10.0869	9.18412	9.89675	3.27539	5.59263	5.36044	5.76457	7.07494	8.07242
Os11g0160500	Os_bZIP_34	10.9804	13.3872	10.7585	17.2812	18.9016	17.0776	11.988	13.4237	12.907	21.9519	18.6631	20.0295
Os02g0194900	Os_bZIP_35	0.401789	0.839419	0.522094	0.592554	0.697321	0.504096	0.448404	0.339797	0.541668	0.495911	0.731547	1.03993
Os02g0175100	Os_bZIP_36	8.69112	8.28342	8.28717	9.35564	8.23862	9.62778	6.09047	7.12374	7.89192	12.712	10.69	14.5102
Os12g0162500	Os_bZIP_37	6.75395	7.1039	6.88013	11.9657	11.5416	11.2	6.00893	6.67006	7.20624	13.1025	11.9887	12.7804
Os12g0233800	Os_bZIP_38	8.67509	9.83209	8.65602	17.6359	16.1118	16.1851	8.1359	9.30584	7.51175	18.1838	16.7826	13.0076
Os08g0487100	Os_bZIP_39	0.840549	0.829746	0.832383	3.91926	2.33987	2.66335	0.642373	0.727015	0.934871	1.30561	1.85712	1.82525
Os08g0472000	Os_bZIP_4	5.16491	6.16305	4.92227	19.6719	19.7875	15.7308	5.32336	5.81058	6.46391	21.5737	17.3067	17.9855
Os01g0859500	Os_bZIP_40	0.354514	0.533269	0.372564	0.753342	0.689244	0.595205	0.34281	0.42052	0.327726	0.600719	0.951112	0.809815
Os02g0538900	Os_bZIP_41	0.260087	0.244518	0.208501	0.409199	0.623455	0.434528	0.198766	0.179965	0.328719	0.428472	0.550696	0.61612
Os02g0266800	Os_bZIP_42	7.2138	9.11465	5.76351	19.4133	18.653	17.4442	7.54966	7.65687	8.15338	18.2966	16.9831	21.2703
Os03g0336200	Os_bZIP_43	0.414095	0.529458	0.60925	2.28381	1.97245	1.60314	0.578677	0.802284	0.569423	1.5281	1.69258	1.81476
Os09g0516200	Os_bZIP_44	6.74502	8.73449	6.80489	12.4859	12.8511	12.0312	6.39033	7.83471	7.4265	20.1174	18.3894	20.1329
Os01g0542700	Os_bZIP_45	8.21326	8.56259	6.21227	19.7262	23.9577	23.3306	5.68199	6.2833	4.44001	16.9181	16.245	17.0966
Os09g0280500	Os_bZIP_46	0.6932	0.601999	0.537427	1.68719	1.48996	0.974699	0.474607	0.453911	0.386088	1.37702	1.66028	1.07271
Os03g0318600	Os_bZIP_47	14.3853	17.7109	13.7581	48.2995	49.6596	38.6696	14.895	17.4145	15.2955	56.239	52.1645	43.2628
Os05g0437700	Os_bZIP_48	2.0031	1.96507	1.49902	5.35632	5.28651	5.76997	1.45001	1.80786	1.2108	5.90299	4.77043	4.62049
Os06g0646700	Os_bZIP_49	3.06959	3.48363	2.84332	9.94738	10.1301	8.33676	3.00415	3.28711	3.53597	11.9817	11.2327	10.9831
Os05g0129300	Os_bZIP_5	112.074	127.511	116.926	203.345	189.296	165.839	113.786	108.37	117.769	249.662	228.586	222.774
Os07g0182000	Os_bZIP_50	0.153313	0.259444	0.216891	0.912213	1.14994	0.653601	0.267809	0.176806	0.186019	0.72163	0.860945	0.832296
Os08g0543900	Os_bZIP_51	4.56601	6.26017	5.05668	12.438	13.8286	10.3825	3.71984	4.20856	5.03641	16.1677	17.4187	16.2861
Os02g0182700	Os_bZIP_52	2.39159	1.69575	2.19258	5.15967	5.20703	3.03272	1.60455	2.12634	2.10744	8.67859	6.96173	7.27963
Os03g0796900	Os_bZIP_53	1.68635	2.17808	1.84313	6.3117	6.15433	5.15721	1.41093	1.74484	1.91224	9.56952	7.9363	7.42025
Os05g0569300	Os_bZIP_54	5.38103	5.75486	4.67223	28.0981	23.3364	24.095	5.93695	6.51753	4.98019	34.6418	27.6517	24.9407
Os12g0634500	Os_bZIP_55	0	0.48756	0.489109	1.4835	1.60406	1.04569	0.566189	0	0.262181	1.70871	2.50646	2.30347
Os07g0679500	Os_bZIP_56	0.199078	0.0779837	0.12517	0.408125	0.307877	0.363183	0.0724481	0.0573959	0.033548	0.562224	0.442899	0.245622
Os01g0658900	Os_bZIP_57	1.44515	1.15425	1.13379	16.0529	13.5778	16.047	1.15888	1.31263	0.918097	18.7812	13.245	13.0398
Os10g0531900	Os_bZIP_58	0.0538729	0.0506481	0.0508091	0.138697	0.124973	0.0931094	0.0588162	0	0.0544711	0.71001	0.595138	1.11667
Os03g0809200	Os_bZIP_59	0	0.0475712	0.143167	1.21586	1.64333	2.9734	0.055243	0.058354	0.153486	2.42933	1.86328	1.84794
Os02g0191600	Os_bZIP_60	0.315568	0.593356	0.520837	20.8074	15.251	10.3626	0.689047	1.00079	0.478608	19.8294	22.587	13.0042
Os11g0154900	Os_bZIP_61	0	0.0687496	0.0229894	0.641501	0.810494	0.758318	0.0532246	0.0843327	0.0985852	2.89129	1.92984	2.55034
Os03g0127500	Os_bZIP_62	0.173711	0.209973	0.21064	0.73827	1.09378	0.543267	0.0270928	0	0.100365	1.86889	1.78192	1.51864
Os01g0859300	Os_bZIP_63	0	0.0807017	0.0404791	19.7669	24.0947	15.1326	0.0937164	0.247485	0.13019	13.3738	21.0202	16.5219
Os01g0211800	Os_bZIP_64	0.785527	0.492337	0.635017	0.0428012	0.115698	0.129299	0.49006	0.345105	0.226929	0.0352134	0	0.110764
Os05g0495200	Os_bZIP_65	14.9443	15.1753	15.1846	13.368	12.0027	12.177	13.0705	15.1396	11.5205	12.747	11.3253	10.5129
Os03g0770000	Os_bZIP_66	0.231363	0.217514	0.218205	2.3826	3.75698	1.19961	0.126296	0	0	1.08901	1.06495	1.25601
Os08g0357300	Os_bZIP_7	3.3048	3.37078	2.91102	12.04	8.51019	6.60981	2.07632	2.91235	1.63923	13.8531	10.7057	7.47793
Os12g0194600	Os_bZIP_8	0.755003	0.861477	0.614688	0.734682	0.983001	0.617124	0.697467	0.788837	0.802534	1.2514	1.02178	0.993626
Os12g0601800	Os_bZIP_9	21.7975	30.0182	23.9324	2.13067	2.59743	2.48208	24.6745	35.0117	22.3164	0.807728	1.32768	1.09918
Os02g0572900	Os_C2H2_1	3.73122	4.98686	2.70108	9.18493	10.8078	9.82994	3.54512	3.18653	5.70996	7.32878	11.5859	12.2032
Os08g0554400	Os_C2H2_10	10.4718	11.0955	9.76995	4.56586	5.76146	6.46795	10.3128	11.3745	10.9756	1.93127	3.39328	5.49628
Os09g0555700	Os_C2H2_11	6.0977	6.55669	5.50293	2.94417	3.31122	4.3136	5.79601	6.00688	6.49457	1.16691	1.99411	3.89299
Os08g0562300	Os_C2H2_12	0.713798	1.70004	0.583443	0.517275	0.735934	0.328978	0.935152	1.09757	1.58779	0.134391	0.306654	1.03334
Os11g0702400	Os_C2H2_13	2.88027	3.67495	3.29856	1.23588	0.954511	1.42229	3.81838	3.55889	9.25679	2.51776	1.32577	3.35061
Os07g0640000	Os_C2H2_14	1.31042	1.61697	1.18439	1.28075	1.18217	1.25823	1.63929	1.3538	1.93224	0.822401	0.552913	0.808397
Os04g0162500	Os_C2H2_15	1.52813	1.53243	1.72947	0.641129	0.433268	0.469527	1.11223	1.11612	0.927059	0.431566	0.422034	0.653609
Os02g0116000	Os_C2H2_16	7.01611	7.62644	6.04169	5.48131	5.66115	6.9645	8.17795	7.86974	7.4253	4.14796	3.83793	4.21533
Os02g0551900	Os_C2H2_17	20.6564	22.103	18.9546	15.3232	16.7907	20.4201	19.3923	19.0804	17.5965	8.51095	10.7666	11.1892
Os03g0239300	Os_C2H2_18	9.41607	9.74821	8.61627	3.23866	4.89738	4.06848	6.79219	6.3344	8.10387	3.00747	3.35382	5.42154
Os12g0279100	Os_C2H2_19	1.41327	1.59311	1.73405	1.21283	1.21484	1.47028	1.23585	1.57445	1.24167	0.697503	0.934727	0.941255
Os07g0569700	Os_C2H2_2	20.226	27.7044	19.5811	31.7262	29.8299	29.7867	20.4733	24.5612	25.1908	39.4679	35.3901	28.4255
Os05g0597100	Os_C2H2_20	15.8781	19.4959	14.6973	18.3086	17.7241	23.8936	21.4611	18.4527	21.3645	15.0397	11.4317	12.8382
Os01g0907400	Os_C2H2_21	1.73666	1.97643	1.41759	2.24861	2.16747	2.60949	1.55229	2.45956	1.65326	1.03254	1.05649	1.56379
Os05g0121400	Os_C2H2_22	5.9183	6.96804	5.92948	6.22339	6.23015	7.6901	5.67632	5.99597	5.59254	4.53	4.2093	4.76792
Os08g0485700	Os_C2H2_23	7.09384	8.80932	7.3894	9.88122	9.4459	10.8422	7.34017	8.92876	7.88184	10.5278	11.3797	10.1763
Os07g0581366	Os_C2H2_24	7.90925	7.4358	7.05893	10.7355	11.1236	12.0183	5.01292	4.8361	6.0649	7.34568	8.89378	10.8456
Os02g0672100	Os_C2H2_25	3.81388	4.47007	3.42634	7.15043	7.61622	5.88698	3.43694	3.30499	4.46356	6.15872	8.66095	8.25752
Os06g0612300	Os_C2H2_26	0.142943	0.345566	0.385183	0.864533	0.836887	0.376459	0.178354	0.235497	0.22712	0.595927	0.620363	0.503897
Os07g0581400	Os_C2H2_27	1.19221	1.22274	1.22663	3.96849	3.93899	3.49664	1.06495	1.24992	0.767107	6.93803	2.79374	2.24655
Os03g0197800	Os_C2H2_28	0.996853	1.64007	1.047	4.61437	4.48481	4.41161	0.989384	0.809952	1.51188	3.90297	5.17245	6.37322
Os01g0909500	Os_C2H2_29	1.33981	1.30342	1.3735	7.43198	6.46838	6.51058	1.043	0.698664	0.824594	6.5696	2.92803	3.50737
Os09g0431900	Os_C2H2_3	3.43575	3.23008	2.76615	0.671195	0.323991	0.579322	1.4638	0.966398	1.86404	0.157773	0.231433	0.330851
Os05g0444200	Os_C2H2_30	1.89677	2.99907	1.43654	13.8606	12.5558	8.80815	2.13357	3.28115	3.08016	18.4511	14.6835	14.9208
Os01g0838600	Os_C2H2_31	2.54755	3.75441	1.68836	8.58738	8.57179	4.44263	1.20273	1.19105	2.15813	11.6022	11.7896	10.1941
Os01g0859100	Os_C2H2_32	0.218539	0.498968	0.20611	4.41176	3.79014	1.87054	0.409014	0.540059	1.32579	7.34745	5.77688	5.6392
Os03g0838800	Os_C2H2_33	0.311209	0.819224	0.528318	2.84876	3.60968	0.860587	0.407717	0.358898	0.503463	7.44134	6.07371	5.4063
Os12g0583700	Os_C2H2_34	1.31157	1.98362	1.45211	46.7187	45.9029	24.5735	1.3074	1.2495	1.38379	44.8246	38.7949	52.2333
Os05g0114400	Os_C2H2_35	0	0	0.146622	2.17911	2.94524	2.14952	0	0	0.15719	2.04891	3.22016	1.99484
Os03g0820300	Os_C2H2_36	5.57148	7.74309	5.10231	198.967	191.434	127.088	9.60891	10.4294	8.89906	401.88	305.959	404.237
Os03g0820400	Os_C2H2_37	2.0974	4.0376	2.63749	83.3684	71.9786	46.4917	2.83506	2.87953	4.24139	153.349	114.931	168.378
Os01g0839100	Os_C2H2_38	0.799011	1.27701	0.301428	65.4148	71.6697	30.2887	0.872326	1.01359	1.61577	93.4952	80.4704	96.8471
Os03g0437200	Os_C2H2_39	0.751667	1.35446	2.54029	36.4818	39.9598	9.9599	0.410319	0.577901	1.07669	60.5593	54.3202	47.5452
Os03g0764100	Os_C2H2_4	37.2531	46.2263	39.9661	66.4559	67.3008	49.9168	21.6427	24.467	25.3927	109.873	116.213	115.203
Os11g0707300	Os_C2H2_40	1.86219	3.41391	2.19536	1.38501	1.36796	1.1801	1.62645	2.04017	1.88287	1.49008	0.942874	2.29758
Os06g0166200	Os_C2H2_41	5.57713	6.11717	5.65445	4.60002	5.37274	5.99762	4.1861	4.79702	4.76971	3.87203	4.34272	4.9085
Os02g0823900	Os_C2H2_5	13.411	16.4781	15.0903	8.58426	11.551	8.26163	15.8013	19.4475	21.0112	5.12496	10.0235	12.1232
Os10g0158700	Os_C2H2_6	4.17939	4.76925	3.75141	0.329806	0.423471	0.398527	3.46149	2.49302	3.23492	0.0542676	0.159207	0.512098
Os04g0115500	Os_C2H2_7	1.6707	1.01633	2.00205	0.123696	0.212781	0.0905881	0.90127	0.952024	0.914183	0.0925157	0.0723779	0.271608
Os02g0518500	Os_C2H2_8	2.40694	2.36299	2.61157	1.34049	1.2353	1.64435	2.18595	2.57926	1.95986	0.380983	0.490222	0.48356
Os01g0871200	Os_C2H2_9	251.523	282.726	253.766	104.92	106.761	142.175	281.976	318.107	267.487	72.9674	80.6041	94.8057
Os05g0195200	Os_C3H_1	7.91796	13.1902	6.63791	50.2537	54.3876	62.9017	6.9257	7.58271	11.3768	36.223	50.8112	77.8794
Os11g0472000	Os_C3H_10	25.9274	21.1382	24.168	13.0225	13.6865	15.0344	24.3757	23.3937	23.6011	17.3219	16.7614	14.3579
Os02g0194200	Os_C3H_11	9.08689	9.7432	8.21597	8.1311	8.28955	8.60963	11.048	10.2628	10.9532	7.26403	7.08631	9.58068
Os04g0117600	Os_C3H_12	4.66382	4.60712	4.67756	5.12776	4.96348	6.63476	5.27476	5.08285	4.95488	3.77781	3.78515	3.99998
Os08g0135800	Os_C3H_13	18.0571	19.1526	17.8521	30.8987	30.5581	30.1884	19.1192	19.662	17.8721	29.0745	27.1787	23.4953
Os01g0258700	Os_C3H_14	11.5799	13.5329	11.8426	21.5002	23.2951	18.4959	13.9755	13.9177	13.9697	21.2578	20.9658	18.5847
Os02g0677700	Os_C3H_15	14.7702	16.419	15.1326	24.9791	23.9956	22.0351	14.8385	17.3942	16.807	26.5179	24.8471	23.7439
Os03g0698800	Os_C3H_16	13.598	15.234	15.5042	23.3725	23.8022	22.8469	11.5942	11.1625	12.1839	16.6744	18.669	19.127
Os08g0159800	Os_C3H_17	4.88873	5.60321	3.78408	7.12044	7.95209	7.00178	3.95514	3.88586	4.9824	5.68394	7.7997	8.84333
Os02g0301000	Os_C3H_18	3.79627	4.6351	3.71986	5.65541	7.31969	6.33392	3.12191	4.29272	4.48647	6.68335	6.35419	8.44309
Os06g0318700	Os_C3H_19	0.712277	1.11607	0.727749	1.18855	1.28514	1.36782	0.820835	0.867059	0.740191	2.01157	1.9125	1.75762
Os03g0112700	Os_C3H_20	36.0916	37.9051	37.6933	84.9505	77.376	65.2811	36.593	43.0596	33.3143	113.049	86.9801	64.4814
Os04g0671800	Os_C3H_21	26.3269	30.1762	28.31	94.2545	99.6235	78.9029	26.5524	31.7607	26.8947	124.245	98.5183	83.2375
Os01g0257400	Os_C3H_22	2.90311	2.74075	2.58907	10.2643	10.0032	9.09724	2.49315	2.64756	2.37038	10.5086	11.1711	9.97525
Os05g0525900	Os_C3H_23	1.3776	2.27945	0.987436	15.8891	22.4554	21.9046	1.44385	1.08032	2.17293	27.3895	23.3858	46.1228
Os01g0738400	Os_C3H_24	0.0703326	0	0	2.61549	5.05783	4.13293	0.153572	0.16222	0.0711136	5.56162	4.79131	9.58013
Os04g0438700	Os_C3H_25	0.970093	1.52004	1.18471	2.09906	1.82725	2.16385	0.923323	1.30521	1.33297	1.28789	1.64872	1.55904
Os07g0568300	Os_C3H_3	22.697	24.8136	23.227	36.0733	36.9583	34.2359	20.2812	20.8531	21.116	38.7656	41.4858	42.5283
Os01g0192000	Os_C3H_4	3.08214	4.16785	3.7829	3.50253	2.318	4.37829	4.79391	5.55078	2.64678	2.0668	1.08831	1.04185
Os01g0917400	Os_C3H_5	64.5757	49.6571	69.5172	11.9629	11.8711	14.554	62.0146	63.9157	59.241	9.45791	10.1256	10.7606
Os06g0618100	Os_C3H_6	3.85891	4.5349	3.26723	3.61267	4.10292	4.44627	3.37518	2.57912	2.79331	1.2797	1.41292	1.86117
Os06g0682800	Os_C3H_7	2.45455	3.23301	2.51472	3.32181	3.16976	3.84744	2.91102	3.86524	2.507	2.06435	1.6173	1.69715
Os01g0572100	Os_C3H_8	1.8148	1.60276	1.69862	1.51022	1.32889	2.04351	1.74116	2.07704	1.47352	1.22954	0.949253	1.07206
Os12g0405100	Os_C3H_9	15.1924	12.9119	15.5773	11.3588	10.8898	11.7215	14.623	15.8489	13.4614	9.44194	9.46403	8.84015
Os07g0490200	Os_CAMTA_1	13.6734	16.6046	13.8009	14.2905	12.9424	16.343	16.889	19.8201	16.131	11.3717	11.388	11.4801
Os03g0191000	Os_CAMTA_2	18.2679	22.2261	17.1215	39.5536	36.6634	32.926	19.1593	24.7772	19.0557	46.772	37.2012	30.5422
Os08g0536300	Os_CO.like_1	1.56432	1.3778	1.42877	1.13991	1.20963	0.77789	1.18651	0.797574	0.899068	2.18568	1.28851	1.56031
Os08g0249000	Os_CO.like_10	12.3233	14.5979	11.9479	19.3462	20.278	16.6413	10.1175	9.03867	11.0148	21.253	17.5617	25.7869
Os02g0724000	Os_CO.like_11	2.21707	2.51748	2.52548	17.1237	21.6078	12.9551	1.83896	2.39079	1.93601	21.481	21.7488	17.7768
Os09g0509700	Os_CO.like_12	0.0634487	0.0397671	0	0.121	0.245311	0.0974749	0	0	0.0427688	1.45342	0.700922	0.83502
Os09g0240200	Os_CO.like_13	8.30265	7.28528	7.9412	5.93519	6.72814	6.9912	6.48705	6.40747	6.6438	3.63166	6.38875	7.47903
Os03g0711100	Os_CO.like_2	37.9769	39.9444	38.6193	12.7489	13.5134	21.5052	31.6417	38.6878	28.6487	6.12797	5.49531	8.26478
Os04g0497700	Os_CO.like_3	184.482	167.428	184.574	59.3377	71.0949	91.9457	111.325	130.801	207.736	34.4218	50.2171	101.374
Os02g0610500	Os_CO.like_4	105.715	109.942	85.9388	50.8204	56.8962	64.083	88.0936	92.8927	116.065	19.1991	40.866	71.6567
Os06g0298200	Os_CO.like_5	0.875484	0.733828	0.885382	6.87349	9.75498	4.72771	0.898236	1.0583	0.639907	10.734	11.6427	7.30874
Os06g0654900	Os_CO.like_6	445.121	513.601	393.677	234.062	268.032	342.712	390.024	378.911	502.388	173.494	242.584	398.635
Os07g0667300	Os_CO.like_7	0.741611	0.370397	1.11472	0.212144	0.161285	0.37384	0.632546	0.507807	0.820144	0.0654505	0.021335	0.160125
Os02g0731700	Os_CO.like_8	0.655578	0.973161	0.91117	0.454028	0.640335	0.516827	0.753402	0.676455	0.837294	0.259852	0.317641	0.442741
Os02g0178100	Os_CO.like_9	139.229	173.055	128.786	68.4837	79.9731	82.6625	119.86	128.937	186.694	48.8663	67.9037	120.014
Os08g0369600	Os_CPP_1	1.86633	1.75461	1.56461	1.05697	1.70555	1.45532	1.19373	1.69577	1.33428	0.621137	0.850385	0.688479
Os02g0274600	Os_CPP_2	0.362134	0.535004	0.378132	0.451362	0.380032	0.655685	0.635404	0.850169	0.510002	0.523535	0.333377	0.306378
Os12g0605300	Os_CPP_3	4.84563	4.90858	4.30023	7.06875	7.45237	7.58158	4.35323	5.5263	4.48361	6.48048	6.1892	6.1771
Os05g0509400	Os_CPP_4	4.99795	6.31638	4.94553	9.60946	11.0028	9.69221	6.02307	5.57484	5.41243	9.82131	10.4844	8.5185
Os07g0176200	Os_CPP_5	0.113018	0.25235	0.0799428	0.541522	0.458809	0.748767	0.200506	0.276965	0.414239	0.771349	0.31213	0.5996
Os06g0332700	Os_CPP_6	1.41242	1.51985	1.25184	2.60917	2.72383	2.33326	1.56059	1.68773	1.46251	3.70052	2.97649	2.67065
Os01g0761100	Os_CPP_7	3.35371	3.69736	3.24263	6.05291	5.99815	5.39317	2.81852	3.2694	2.73228	7.80196	6.26363	5.7989
Os01g0202500	Os_DBB_1	1.9262	2.1652	1.61919	3.11436	2.9789	4.00453	2.01151	1.497	1.65121	2.68051	2.12017	3.71981
Os04g0540200	Os_DBB_3	7.84402	6.17538	6.10479	2.46275	3.6738	2.27786	5.88324	6.83968	5.93222	2.22127	3.93346	4.46918
Os05g0204600	Os_DBB_4	27.0523	24.6939	24.0821	4.0631	5.13528	7.27714	24.9179	24.2267	23.543	1.73519	1.94641	4.73568
Os02g0606200	Os_DBB_5	269.569	300.983	229.072	44.7009	59.0682	75.222	260.793	232.84	316.001	29.7713	58.6022	96.2856
Os09g0527900	Os_DBB_6	182.67	181.231	167.564	66.8291	71.0871	83.5798	152.119	163.699	137.227	28.6148	37.0133	46.4373
Os04g0493000	Os_DBB_7	756.024	823.221	693.36	208.267	281.18	415.019	687.829	595.072	812.892	131.254	157.925	298.664
Os06g0152200	Os_DBB_8	6.5691	7.56464	6.44136	11.9708	11.9196	11.8541	6.18526	7.23503	7.13405	17.6032	11.9349	13.8771
Os02g0646200	Os_DBB_9	0.887164	0.303294	0.380323	0.276851	0.654826	0.278782	0.308181	0	0.407734	0.569427	0.742468	1.19409
Os01g0277500	Os_Dof_1	1.25135	0.852924	0.870388	0.420602	0.350762	0.72091	0.853858	0.865865	0.53773	0.250325	0.230397	0.169831
Os01g0673700	Os_Dof_4	0.226299	0.212753	0.276202	0.761582	1.21462	0.598176	0.217997	0.168867	0.336488	1.16542	0.759785	1.15625
Os02g0726300	Os_Dof_2	50.1511	45.4211	52.8461	13.58	16.6489	22.3272	27.9211	31.4314	37.2213	13.6938	16.6304	24.2064
Os03g0169600	Os_Dof_3	21.0101	21.1651	20.1695	11.5618	12.0443	11.2817	20.368	23.5655	20.18	8.62807	10.4431	8.08259
Os07g0508700	Os_Dof_5	9.02985	12.6305	9.97031	20.1604	17.5412	14.7182	6.97301	9.3976	14.0292	10.7812	12.7733	24.5646
Os07g0508900	Os_Dof_10	14.1163	13.9842	12.8734	28.934	26.5221	25.54	11.3995	15.2704	11.0882	33.1123	21.2114	19.9213
Os03g0821200	Os_Dof_11	1.16207	1.12126	1.09598	2.0295	2.50657	1.6913	0.734508	0.987472	0.95853	2.10153	1.97066	2.11291
Os04g0678400	Os_Dof_12	0.967816	1.81977	0.958413	4.40193	3.44251	2.62055	1.16228	0.948704	1.71248	6.60536	4.09842	5.25401
Os10g0406300	Os_Dof_13	0.876992	0.945745	0.948751	6.4636	6.72159	5.43875	0.901141	1.36834	0.964971	5.82765	6.38756	4.96463
Os10g0496000	Os_Dof_14	0.602356	0.217807	0.3059	2.88948	2.07808	1.81518	0.505867	0.427483	0.421646	2.83523	2.21809	3.01849
Os01g0758200	Os_Dof_15	0.510417	0.899745	0.361042	27.3036	35.0283	20.0692	0.696565	0.882949	0.774128	27.4484	37.5908	37.0295
Os02g0707200	Os_Dof_16	1.77447	1.72578	1.38501	0.525105	0.851665	0.493516	0.935245	0.776217	1.29923	0.979233	1.12659	1.20792
Os08g0490100	Os_Dof_17	25.23	34.3244	36.3865	21.4802	20.2256	28.254	18.7996	19.7955	22.4798	20.1602	20.1162	32.5945
Os07g0685000	Os_Dof_18	31.8638	30.6402	33.0405	25.2145	23.5677	28.5529	20.5511	20.8297	18.5952	14.6719	19.4972	17.2467
Os04g0567800	Os_Dof_19	5.476	4.77455	4.87302	4.11825	4.09777	4.27417	5.20704	3.92149	5.84936	3.69996	4.67526	6.10246
Os01g0264000	Os_Dof_20	4.43196	6.01032	4.62379	9.89553	9.67459	10.3035	6.12321	7.0108	5.9088	6.83053	7.61843	5.92303
Os03g0276300	Os_Dof_6	1.79968	2.46102	2.16023	1.12322	1.51813	1.8851	1.25033	3.20752	2.97763	0.308033	0.60246	0.968922
Os06g0284500	Os_Dof_7	8.17721	10.0436	9.01825	2.30142	4.18141	6.00263	3.16783	3.34622	6.93446	0.993274	1.457	2.92908
Os09g0475800	Os_Dof_8	13.9325	14.7024	19.9337	8.62172	8.28165	4.91425	6.4155	6.66748	9.19984	11.2421	9.51055	14.2198
Os02g0673700	Os_Dof_9	2.81144	2.38402	2.00166	2.94886	3.58066	2.79475	2.67821	2.09793	3.09348	4.43701	3.67928	4.21693
Os01g0678700	Os_E2F.DP_1	0.683051	0.697206	0.681016	0.535932	0.437631	0.629614	1.02271	0.945264	0.789298	0.385807	0.395252	0.443046
Os12g0158800	Os_E2F.DP_2	0.838931	1.38328	0.998154	1.03377	0.888236	0.981496	1.25409	1.02703	1.0962	0.777604	0.772312	0.738885
Os02g0537500	Os_E2F.DP_3	1.45286	2.12472	1.19261	2.94	2.93342	2.728	1.49805	1.31868	1.21056	3.59653	2.83597	2.57595
Os03g0152100	Os_E2F.DP_4	1.04552	1.24348	0.914783	3.29349	2.99033	2.78669	1.25148	1.26385	1.43923	5.90543	3.78042	2.94673
Os04g0112200	Os_E2F.DP_5	1.49572	1.46133	1.13405	3.54034	3.40169	2.48369	1.24873	1.25141	1.24544	5.65976	3.61784	2.99609
Os08g0508700	Os_EIL_1	0.364592	0.282279	0.465219	0.0736196	0.0829189	0	0.491704	0.717258	0.303587	0.121137	0.33564	0.296362
Os09g0490200	Os_EIL_2	16.2428	17.2416	15.319	25.7956	23.5698	22.7766	14.2368	16.5265	14.3498	21.3635	22.9066	18.0335
Os03g0324300	Os_EIL_3	8.00961	10.0563	8.23202	13.4046	12.9428	14.9277	8.46427	9.43436	8.60038	17.7708	15.078	13.7169
Os07g0685700	Os_EIL_4	82.3441	104.994	81.1228	168.142	142.352	177.461	62.9982	60.5081	79.1732	117.106	146.712	181.567
Os02g0574800	Os_EIL_5	0.0929837	0.262253	0.175391	1.38313	1.94131	2.46414	0	0.107232	0.0940162	0.612732	0.513599	1.10135
Os01g0797600	Os_ERF_1	23.1209	25.9381	30.7849	113.937	122.695	85.6661	18.7373	20.39	19.776	154.737	170.756	153.74
Os02g0655200	Os_ERF_10	1.16624	1.40343	1.14391	13.5046	19.1183	19.5113	1.0186	1.02216	1.32069	11.901	14.0001	21.6873
Os09g0434500	Os_ERF_12	255.334	239.225	258.28	102.375	104.367	109.779	305.52	311.602	316.273	146.124	147.662	163.577
Os07g0617000	Os_ERF_13	10.626	15.2069	8.9453	36.6109	29.0931	19.3174	17.0578	18.2907	19.6178	36.7893	43.7663	36.0488
Os01g0868000	Os_ERF_14	4.65548	10.3293	9.74739	51.0321	67.462	34.2229	6.09919	4.83199	10.6382	80.1137	95.916	111.295
Os05g0497200	Os_ERF_15	1.95256	3.53015	3.32888	3.56608	5.1102	1.90364	1.22984	1.21249	1.36678	6.36265	7.46655	10.9705
Os09g0286600	Os_ERF_16	7.66306	12.1524	6.67131	20.62	19.8603	18.2411	9.10169	10.294	14.73	17.1627	23.4118	31.959
Os09g0287000	Os_ERF_17	1.8965	1.94883	1.0815	2.2205	2.28499	1.93107	1.10748	1.27158	1.82837	2.11748	2.15192	4.22271
Os04g0610400	Os_ERF_18	17.8201	23.6634	30.8667	57.8784	60.4264	45.0597	11.1281	11.9947	16.8261	73.1074	83.4294	91.5734
Os05g0572000	Os_ERF_19	9.54834	10.6891	12.0244	124.285	139.088	100.351	6.80904	8.21089	9.87759	141.532	154.919	202.438
Os02g0654700	Os_ERF_2	6.82388	12.8805	8.48129	10.1687	7.44455	4.876	4.1004	4.39231	7.91589	16.9809	16.4111	13.3143
Os04g0669200	Os_ERF_20	14.9817	22.1109	18.2344	48.5066	53.5875	38.0922	12.6099	16.2157	21.2411	49.9531	55.9385	72.0377
Os10g0560700	Os_ERF_21	1.77881	1.92009	1.11843	0.489997	0.458495	0.910918	1.51047	1.13966	1.79857	0	0.181951	1.04045
Os04g0550200	Os_ERF_22	4.38162	4.90397	6.55941	0.835597	0.806697	1.44244	5.46704	5.05305	6.96186	1.76776	1.9208	1.71621
Os05g0448700	Os_ERF_23	0	0	0	0	0	0	9.16009	9.30849	10.3089	2.59948	3.91087	4.40283
Os02g0499000	Os_ERF_24	24.4449	21.1788	23.4931	17.3542	18.7075	16.5043	26.9628	30.7932	20.8972	18.4716	15.2462	14.0907
Os03g0183200	Os_ERF_25	30.2555	41.7914	26.3947	22.8687	25.6899	31.9109	26.0442	35.2273	34.1801	16.5415	17.1403	27.9109
Os02g0752800	Os_ERF_26	46.0054	53.9796	51.6414	49.6475	59.1855	45.8882	41.6586	43.4844	42.4119	67.5105	56.9262	60.8128
Os03g0183300	Os_ERF_27	141.867	135.379	108.474	161.801	171.991	177.668	94.239	94.562	148.977	109.032	185.504	259.354
Os02g0656600	Os_ERF_28	0.686659	1.10667	0.78638	1.09436	0.796448	1.07374	1.0174	1.30095	1.38857	2.40094	1.39972	2.66263
Os06g0691100	Os_ERF_29	8.42267	11.2838	10.5253	19.6364	27.3542	19.8946	11.8009	10.6847	13.342	27.2888	21.4522	29.513
Os02g0782700	Os_ERF_3	32.5793	33.8323	33.072	112.404	109.654	84.5898	31.333	33.7571	29.6972	133.003	117.29	99.5889
Os03g0341000	Os_ERF_30	0.438023	0.360328	0.154917	0.6265	0.423382	0.189261	0.239108	0.315716	0.442887	0.979324	0.80648	0.972782
Os01g0752500	Os_ERF_31	4.23891	7.3411	3.99783	11.8704	13.6286	13.8812	2.84167	3.60203	7.0681	8.05087	12.7338	16.4423
Os05g0346200	Os_ERF_32	18.4028	21.807	17.3954	40.12	43.5247	33.8258	17.7584	19.4762	17.1807	65.9369	46.0494	44.561
Os06g0194000	Os_ERF_33	45.0035	43.1626	43.4812	123.373	114.985	111.341	40.639	43.3714	40.5276	146.869	131.021	125.907
Os08g0442400	Os_ERF_34	0.422043	0.308607	0.353814	0.536572	1.01531	0.77445	0.255983	0.270398	0.189658	0.647458	0.863397	1.18801
Os07g0227600	Os_ERF_35	31.0795	32.4911	27.8617	81.7745	100.386	71.2473	20.5002	28.1883	40.5083	89.5255	110.572	167.364
Os01g0313300	Os_ERF_36	0.347045	0.130508	0.130923	0.31768	0.48304	0.399869	0.0757778	0.32018	0.210539	0.784084	1.08625	1.02764
Os02g0677300	Os_ERF_37	0.648254	1.82835	8.61036	0.370876	0.668358	0.560193	0.235912	0.249197	0.218484	1.47478	0.74597	1.22639
Os04g0529100	Os_ERF_38	0.918158	0.828669	0.796665	0.798444	1.30635	0.804012	0.481154	0.550604	1.11402	5.0823	2.77241	3.19004
Os03g0183000	Os_ERF_39	3.31485	3.8497	3.27345	28.1794	29.8844	18.6027	10.0907	7.01599	8.63545	47.6158	47.6052	48.886
Os06g0166400	Os_ERF_4	10.256	19.3484	8.44748	71.7802	68.6254	79.5679	9.48014	14.5085	15.14	43.4465	57.5304	75.923
Os01g0165000	Os_ERF_40	2.83444	3.61648	2.84509	29.5715	26.849	19.6652	3.02821	4.50625	3.70522	25.4631	20.1293	17.3858
Os02g0676800	Os_ERF_41	0.203178	0.305626	0.114974	0.767194	0.722704	0.983237	0.31055	0.281176	0.698477	3.44283	2.76825	2.36644
Os09g0522000	Os_ERF_42	2.02103	3.50778	9.2372	1.33415	1.08192	2.6869	0.848643	0.717146	0.31438	5.85402	4.86602	3.52933
Os04g0398000	Os_ERF_43	3.08854	4.67704	2.03316	64.3711	64.4826	44.6384	5.88392	8.05594	9.3266	72.024	85.2794	71.3641
Os04g0549700	Os_ERF_44	0.181465	0.398074	0.114097	2.07638	4.63055	1.67269	0.264155	0.418546	0.550441	3.01797	9.41078	5.31372
Os02g0638650	Os_ERF_45	2.02799	3.94029	3.41089	12.3566	12.9634	7.20472	2.69378	2.6116	3.00741	53.3596	33.5739	46.3729
Os02g0764700	Os_ERF_46	0.075428	0.212739	0.213415	13.766	10.1486	13.4709	0.411745	0.608905	0.838921	18.1777	14.582	25.4621
Os08g0545500	Os_ERF_47	0.0143216	0.0403929	0.0405213	1.43388	1.49503	1.28711	0.0312714	0.0495486	0.0579224	0.970709	1.67441	2.06386
Os04g0429050	Os_ERF_48	0	0	0.176346	2.51388	1.80729	1.40036	0.102068	0	0.0945278	2.90431	2.4959	3.13746
Os02g0521100	Os_ERF_49	0.354201	0.554997	0.111352	6.41705	6.02556	3.80906	0.1289	0.272318	0.238756	11.1146	9.67351	7.80798
Os11g0168500	Os_ERF_50	0.0344091	0	0	0.905554	1.09089	0.198232	0.0751327	0.0396819	0.104373	4.92359	3.13599	2.51328
Os09g0457900	Os_ERF_51	0.249872	0.117458	0.824816	7.39797	8.79134	2.30324	0.1364	0.216122	0.252647	13.7607	10.2938	11.9618
Os06g0127100	Os_ERF_52	0.179882	0.0845572	0.678607	15.0768	16.1351	17.0991	0.687356	0.518617	0.363759	47.3299	30.1387	76.8796
Os08g0474000	Os_ERF_53	0.0635661	0.059761	0.299755	1.34558	2.06443	0.952139	0	0	0	6.70207	2.80888	5.70956
Os09g0522200	Os_ERF_54	7.17025	5.26644	11.2003	1.96564	1.7904	3.9587	0.896978	2.32566	2.7187	2.24998	3.02539	4.71823
Os10g0371100	Os_ERF_55	1.8199	1.14064	1.45634	0.536371	0.511728	0.50834	0.662295	0.635992	1.11522	0.674904	0.609229	1.30641
Os05g0316800	Os_ERF_56	3.58959	5.94593	3.06302	15.1905	13.6141	23.5684	5.03866	7.16225	6.7404	5.90014	7.76304	13.2162
Os05g0497300	Os_ERF_6	46.3967	56.2088	60.1229	63.1236	63.3433	60.9198	26.4252	31.1759	39.9196	82.2643	84.2093	103.94
Os08g0408500	Os_ERF_7	53.1906	75.4795	57.4274	202.874	173.178	166.5	34.3974	48.046	42.2928	236.885	206.518	225.123
Os08g0537900	Os_ERF_8	2.00436	3.15092	2.04531	10.8187	7.9527	11.7744	2.70843	2.36834	2.55818	4.6089	5.85318	8.69192
Os03g0182800	Os_ERF_9	1.16775	2.05847	0.619504	2.04602	1.97526	1.42959	1.51395	1.80962	2.9887	3.22919	2.95631	4.10621
Os03g0718200	Os_FAR1_1	6.68836	8.00971	7.5095	4.9198	3.38632	5.77979	4.08568	4.95853	3.30081	2.69841	2.49221	3.61521
Os12g0160900	Os_FAR1_10	3.87789	4.36271	4.4837	4.13087	3.98979	4.59901	3.98571	4.92122	4.11782	2.96323	3.12184	2.67454
Os03g0181600	Os_FAR1_11	3.93723	4.82429	3.78371	4.69726	4.83368	6.27802	4.46147	5.48741	4.37716	3.51321	3.14359	3.09423
Os02g0608100	Os_FAR1_12	20.9078	22.461	21.3366	21.4912	19.6275	23.7465	18.6464	22.3915	18.928	12.474	15.4713	13.8152
Os12g0225300	Os_FAR1_13	5.20837	5.11917	4.13068	4.92116	4.1342	5.81928	4.63086	4.9599	4.26881	2.95298	3.61424	3.1741
Os04g0476500	Os_FAR1_14	7.9104	9.89667	8.29749	9.36646	9.03913	12.1115	8.05158	9.51077	8.40047	5.04129	6.47936	6.87156
Os03g0843700	Os_FAR1_15	8.66689	9.3143	8.20478	6.75135	6.9668	8.40636	8.07222	8.31975	7.88847	5.7619	5.76987	5.91249
Os02g0202800	Os_FAR1_16	6.24506	6.63232	5.12639	7.91771	7.03491	8.4393	6.81809	9.46935	5.9636	12.3386	10.6111	9.1701
Os10g0490400	Os_FAR1_17	6.58705	3.94084	3.24741	1.11344	0.578807	1.72492	1.47098	0.345293	1.36231	0	0	0.295532
Os03g0164400	Os_FAR1_18	5.98264	6.29411	6.23351	5.39492	4.31772	4.85811	5.41189	6.34089	4.58001	5.57831	3.54057	3.71179
Os08g0246800	Os_FAR1_19	40.6491	53.0893	42.3728	38.3627	39.6604	49.0418	7.86773	7.66151	9.22198	4.34603	5.9086	7.72438
Os11g0151002	Os_FAR1_2	0.600485	0.396704	0.62756	0.0278551	0.0125495	0	0.372088	0.486623	0.541514	0.030556	0.0149405	0.0480571
Os02g0608300	Os_FAR1_20	8.03649	8.73767	8.08383	8.12058	7.3208	8.24382	7.0854	7.51774	6.57658	6.40883	6.98582	5.94927
Os05g0475600	Os_FAR1_21	2.42295	2.00457	1.73672	4.04773	3.9345	4.29929	0	0	0	0	0	0
Os06g0597800	Os_FAR1_3	5.5517	5.05331	4.90277	3.82589	3.688	4.68124	3.74687	4.21979	3.69971	1.82919	2.11403	2.26663
Os02g0542200	Os_FAR1_4	5.45863	6.21698	5.67325	5.36808	4.93493	6.57111	5.36651	6.16982	5.64281	2.68437	3.42511	3.05582
Os07g0615900	Os_FAR1_5	10.6759	10.292	10.6831	10.3937	9.89231	11.3835	8.96882	12.1658	8.54409	5.09319	5.86357	5.85818
Os03g0255400	Os_FAR1_6	18.9595	19.1139	18.1952	17.2303	13.7443	17.059	17.1524	19.5002	14.7949	10.3529	9.87912	9.8563
Os05g0317300	Os_FAR1_7	2.28119	2.10087	1.97582	2.33054	1.60195	2.68205	1.24525	2.12071	1.41215	1.07373	1.02859	0.987959
Os05g0370100	Os_FAR1_8	1.16392	0.920397	0.697622	0.746801	0.782255	1.09041	0.961947	1.0663	1.08886	0.73729	0.610852	0.687157
Os03g0777700	Os_FAR1_9	18.9738	19.2393	20.5053	31.1579	27.7335	31.8931	30.4264	37.4601	29.2551	24.3871	20.1677	19.9889
Os01g0239000	Os_G2.like_1	59.2999	68.9881	56.0693	43.3695	49.9404	54.7994	56.4156	59.9976	68.176	30.1001	50.9576	67.2303
Os12g0586300	Os_G2.like_10	8.51069	8.28424	7.5363	1.503	1.8833	1.79726	7.11062	6.43804	8.02414	1.26231	1.68789	1.62066
Os02g0241200	Os_G2.like_11	1.62592	0.977295	1.3072	0.594725	0.55649	0.644939	0.989403	1.07586	0.970212	0.200735	0.245377	0.210472
Os04g0665600	Os_G2.like_12	5.90971	7.14649	5.74848	1.07398	1.36196	1.30844	7.53995	7.67056	6.86578	1.52718	2.17617	3.22538
Os02g0325600	Os_G2.like_13	0.597088	0.717277	0.844697	0.417515	0.256502	0.535089	0.869167	0.918113	0.872038	0.124908	0.152687	0.687577
Os01g0844900	Os_G2.like_14	1.63052	1.12232	1.42795	0.66632	0.472807	0.738063	1.27153	1.27597	1.23647	0.767472	0.482478	0.287392
Os05g0491500	Os_G2.like_15	12.7198	13.0965	12.3874	8.31135	7.87367	9.3056	12.8911	13.8274	12.0729	6.30711	6.30522	6.49845
Os08g0346400	Os_G2.like_16	4.33219	4.39746	4.54324	3.36269	3.38169	4.42329	4.21814	4.62632	4.26393	2.21324	2.00544	2.43419
Os08g0434700	Os_G2.like_17	28.8518	30.8417	26.8411	11.4592	15.387	15.0216	20.4405	21.0264	24.9433	8.79718	11.6109	16.1579
Os06g0543200	Os_G2.like_18	3.43311	3.50071	3.18805	1.99435	2.06248	2.28211	2.94083	3.53281	2.72358	1.71537	1.79904	1.64218
Os09g0299000	Os_G2.like_19	7.54038	9.42744	7.05871	6.27544	6.5151	7.2035	6.92342	8.07564	7.32957	3.59665	4.5796	4.79958
Os03g0764600	Os_G2.like_2	79.0538	90.4225	85.0053	137.052	134.087	113.534	66.4967	70.282	82.8117	120.634	138.398	148.249
Os06g0703900	Os_G2.like_20	14.6774	16.2877	15.1278	13.8319	11.8762	14.6909	15.1953	20.3387	13.5807	9.05251	10.1428	9.60687
Os02g0696900	Os_G2.like_21	1.36605	1.19063	1.12731	0.708267	0.869253	1.0985	1.02533	1.21435	0.863259	0.723358	0.602584	0.632036
Os02g0700300	Os_G2.like_22	2.89231	2.93161	3.49502	1.71937	2.55101	2.31716	2.73832	2.65799	2.60457	2.0208	1.80976	1.985
Os03g0325500	Os_G2.like_23	23.5567	25.7356	19.9778	24.2909	23.8313	21.2418	16.5695	18.4689	17.4636	33.4391	27.0433	24.5381
Os09g0299200	Os_G2.like_24	14.1851	15.9166	14.9073	26.4123	22.7353	23.3914	15.9694	17.591	13.8583	33.6615	25.1676	24.5477
Os04g0566600	Os_G2.like_25	1.43193	1.54565	1.13375	1.78005	2.20084	1.81283	1.10011	1.24361	1.26909	2.99554	3.56407	2.51267
Os06g0664800	Os_G2.like_26	0.791951	1.092	0.722014	1.94827	2.32706	1.33832	0.634053	0.639315	0.72067	3.25547	2.06567	2.13662
Os02g0139000	Os_G2.like_27	3.40832	6.2797	2.19841	107.808	93.3791	72.2451	4.106	6.27994	4.09975	121.021	106.176	81.8225
Os02g0168200	Os_G2.like_28	0.142046	0.400631	0.133968	13.7747	16.2287	7.48777	0.27139	0.286673	0.430871	12.3022	16.7054	11.3567
Os01g0971800	Os_G2.like_29	0.0552815	0.311834	0.20855	26.3456	46.5514	16.9431	0.482832	0.255011	1.67686	43.9226	58.4236	53.1465
Os07g0685300	Os_G2.like_30	8.83845	7.52377	7.093	5.95761	5.86517	7.81371	9.1582	8.19133	8.70912	6.53526	8.60999	11.3887
Os05g0412000	Os_G2.like_31	14.4533	19.1996	13.8174	20.1785	23.9544	25.7472	15.9411	13.5393	19.2523	13.3275	19.4815	27.5583
Os07g0119300	Os_G2.like_4	92.2142	101.277	94.4023	56.1437	63.833	63.1913	71.3216	72.9528	78.2393	38.3355	47.4683	59.7644
Os06g0670300	Os_G2.like_5	3.03931	4.90724	3.36498	38.4938	43.5975	17.6619	3.82313	4.24162	4.98816	60.4574	47.7681	36.1513
Os12g0105600	Os_G2.like_6	9.02186	13.6804	6.37396	20.9792	22.1039	18.89	12.9211	16.4456	18.3749	24.231	25.214	26.9064
Os03g0654600	Os_G2.like_7	5.19704	5.72791	5.18302	37.4575	33.5868	28.1893	3.86655	4.50681	3.97879	22.9674	29.3431	25.5815
Os05g0488600	Os_G2.like_8	15.0148	15.0018	14.0498	1.24642	1.54805	1.15335	9.93195	12.4265	9.07917	2.82694	1.70748	1.7145
Os06g0348800	Os_G2.like_9	196.362	175.835	180.019	58.7266	63.7837	90.3004	196.427	197.643	215.205	19.5573	34.6284	48.2272
Os05g0155400	Os_GATA_1	22.0757	17.2015	19.6025	7.20676	7.695	5.37019	9.69553	12.6385	11.1445	8.50832	7.71159	7.05599
Os02g0806400	Os_GATA_10	0.345933	0.413924	0.563539	0.647718	1.04567	0.724705	0.480677	0.471479	0.286179	1.09539	1.33175	1.45893
Os04g0539500	Os_GATA_11	7.57115	7.08616	5.70608	4.67964	5.25333	5.41327	5.31376	6.27565	6.42492	4.96368	4.7607	5.37125
Os06g0571800	Os_GATA_2	15.0863	10.9127	15.5927	6.99552	8.30975	11.0328	11.6572	10.566	12.2588	4.40974	5.07334	8.12534
Os02g0220400	Os_GATA_3	18.8036	17.6012	23.8641	4.02249	4.45685	4.89833	17.2711	12.5867	14.8379	1.15444	2.5213	3.95408
Os01g0976800	Os_GATA_4	2.56337	3.18733	2.41759	2.74386	3.51672	4.00157	3.43052	3.1469	4.26399	0.778423	1.37021	2.12207
Os03g0684000	Os_GATA_5	8.75687	8.29128	8.4205	5.92813	5.34959	7.12745	6.63442	7.11585	5.29356	3.095	3.42828	4.26018
Os03g0734900	Os_GATA_6	6.44525	5.86532	6.57946	4.22746	3.67231	4.3674	5.49084	5.08567	5.15977	2.92959	2.71553	3.52297
Os01g0343300	Os_GATA_7	13.2997	7.34717	12.2485	5.3165	7.31752	3.70003	9.49385	10.2251	8.73503	7.59764	5.33692	5.18922
Os02g0148500	Os_GATA_8	8.1091	9.44713	7.16013	17.9021	18.2114	16.1966	9.63967	9.1387	9.05828	24.8141	20.933	19.4722
Os05g0520300	Os_GATA_9	0.354749	0.600325	0.334574	0.324732	0.960096	0.367871	0.19365	0.245466	0.466295	0.80149	0.718473	1.05046
Os09g0451700	Os_GeBP_1	4.8485	6.40515	5.83421	10.5217	11.0535	10.2579	6.25167	7.32676	7.05767	9.56139	9.88891	9.6126
Os02g0768700	Os_GeBP_2	1.34615	1.87918	1.40425	1.68034	2.03453	2.11507	1.04658	1.05848	1.46421	1.24804	2.57239	2.43597
Os03g0370250	Os_GeBP_3	1.58609	2.763	1.58388	3.44288	4.40082	4.83751	1.78255	2.15193	3.16023	2.41533	4.03685	6.07796
Os08g0467600	Os_GeBP_4	5.6865	6.20838	5.5015	9.76	11.9432	14.0763	5.40721	5.24631	5.82383	4.90419	8.2408	10.5014
Os10g0369600	Os_GRAS_1	12.2437	12.7861	11.1434	17.5427	17.279	15.4646	10.7951	11.5265	9.70887	23.0857	17.9752	17.4406
Os07g0567700	Os_GRAS_10	6.2152	6.78297	5.98471	1.81521	2.68865	3.75588	4.60275	5.21281	6.76762	0.409152	1.08031	2.40239
Os06g0610300	Os_GRAS_11	3.29305	4.1279	5.59038	1.6956	2.54638	3.54133	3.35553	3.67108	2.88567	0.930004	0.404206	0.975113
Os04g0555000	Os_GRAS_12	1.99136	2.60157	1.9025	0.784186	0.979898	1.01314	1.8635	1.55089	1.56894	0.365188	0.499971	0.816855
Os02g0663100	Os_GRAS_13	13.8053	13.4746	12.9071	7.11663	7.35765	6.79344	13.4759	12.7422	15.2672	3.33926	4.36872	6.93149
Os12g0122000	Os_GRAS_14	1.31203	1.60169	1.27435	0.918682	0.847971	0.947651	1.17586	1.12916	1.82159	0.460865	0.739125	1.04375
Os01g0842200	Os_GRAS_15	94.2222	117.544	104.651	62.0207	59.6426	74.96	82.1867	79.0554	64.903	50.6505	53.4598	57.1568
Os03g0690600	Os_GRAS_16	13.2326	13.6401	14.0132	15.8112	14.8279	17.9456	13.2063	15.2603	12.92	10.1037	10.6691	11.6635
Os07g0545800	Os_GRAS_17	9.55551	10.3571	10.5968	23.4306	20.6414	20.0502	9.53901	9.92454	9.1741	25.9683	25.2199	20.9401
Os04g0580300	Os_GRAS_18	12.4347	11.2843	10.1561	20.7421	24.8374	18.3092	9.19644	9.18057	12.8848	19.2579	29.797	38.5263
Os04g0432100	Os_GRAS_19	0.223827	0.336686	0.211098	0.460998	0.346153	0.154737	0.195492	0.10325	0.271575	0.421413	0.824212	0.795336
Os01g0948200	Os_GRAS_2	9.85766	11.5554	8.51905	28.9065	34.6682	21.7657	11.5727	11.8439	17.7657	49.583	53.7277	66.8067
Os06g0127800	Os_GRAS_20	0.0668433	0.0209474	0.0630418	0.599126	0.74085	0.590468	0.0243256	0	0.112643	0.587301	0.902517	1.27556
Os11g0139600	Os_GRAS_21	0.0282197	0.0265305	0	0.113014	0.261854	0.032515	0	0	0	0.318786	0.727405	0.445664
Os11g0124300	Os_GRAS_22	2.66854	3.83488	2.94822	1.723	2.09295	2.41585	2.41396	2.26413	3.50762	1.16634	2.15833	2.48345
Os03g0707600	Os_GRAS_23	50.0709	48.2367	48.4733	30.9043	31.7713	39.3664	37.0437	33.5592	45.7131	15.5825	27.4128	41.6599
Os03g0723000	Os_GRAS_24	0.992512	1.71068	0.904864	1.00317	0.613975	0.876746	0.830746	0.381534	0.735924	0.77861	0.670044	0.653101
Os04g0590400	Os_GRAS_25	5.00655	6.16599	5.00513	11.7581	12.3109	11.8256	3.27956	3.55085	3.87254	3.39341	3.43369	4.07688
Os03g0193000	Os_GRAS_3	5.34032	6.46213	5.10547	9.48211	8.75089	8.50868	4.28165	5.04	3.56459	9.15122	7.46079	6.84628
Os11g0705200	Os_GRAS_4	10.6407	16.4785	11.2644	23.712	26.6512	20.4458	11.9897	11.9851	18.4124	26.2544	36.8697	36.071
Os02g0662700	Os_GRAS_5	5.93632	5.24968	4.78063	4.03209	4.758	4.21637	4.49824	5.47054	6.71483	2.06692	3.04438	3.98653
Os07g0583600	Os_GRAS_6	42.0299	44.4905	49.5682	14.7678	15.0083	19.0511	39.8043	38.7078	38.9285	16.0878	14.8199	16.6332
Os12g0573200	Os_GRAS_8	27.4677	37.6825	28.9228	58.4137	60.98	51.4486	28.4412	31.6504	36.0444	61.8043	79.1622	61.3736
Os05g0500600	Os_GRAS_9	4.23341	1.46632	2.98398	0.0509894	0.103374	0	2.62716	1.64451	2.56825	0.37755	0.328188	0.351878
Os04g0600900	Os_GRF_1	0.549719	0.629164	0.631164	0.0546962	0.0739262	0.110155	0.339221	0.441014	0.338327	0.0449996	0	0.0471823
Os02g0776900	Os_GRF_2	0	0	0	0.189505	0.48665	0.648811	0.0361629	0	0.200948	0.374183	0.365919	0.490416
Os08g0426000	Os_HB.other_3	0	0.0301736	0.060539	0.0183619	0	0	3.01341	3.22012	3.99149	0.87619	1.77277	2.59767
Os06g0601000	Os_HB.other_4	14.0935	19.4191	16.6677	13.5878	12.4259	20.6634	15.468	17.3281	15.1547	10.4945	7.55118	11.7028
Os02g0147800	Os_HB.other_5	12.1813	13.4842	11.799	23.6016	20.8974	20.3192	11.7363	13.9819	10.7969	23.3657	20.201	16.9261
Os05g0562400	Os_HB.other_6	26.6807	28.8295	27.9276	41.2284	39.4879	38.914	27.193	29.6386	25.9119	33.9636	35.95	29.5368
Os05g0320300	Os_HB.other_7	4.27885	5.37245	4.77889	4.44504	4.96299	6.03292	6.26959	5.25917	4.81023	3.78953	3.21345	4.75133
Os03g0769800	Os_HB.other_8	9.19322	8.83559	8.42187	21.1556	20.2622	21.5224	4.2832	4.35559	4.44043	9.06775	13.692	13.2355
Os06g0229300	Os_HB.PHD	5.44594	5.39244	4.98515	7.68453	6.97725	7.31188	4.53001	5.20733	4.51155	8.00599	7.19019	6.10564
Os04g0541700	Os_HD-ZIP_5	79.9775	107.207	80.9929	492.005	504.7	476.666	63.4559	71.0496	66.4955	464.673	493.908	626.368
Os04g0548700	Os_HD-ZIP_4	3.10703	2.58237	2.37824	0.747099	1.04458	3.37242	1.13071	0.986664	1.41141	0.0847798	0.207268	0.400014
Os09g0379600	Os_HD-ZIP_1	8.1919	12.0083	5.03207	310.988	270.34	206.287	8.94356	13.6114	11.4979	110.348	90.8438	88.2517
Os10g0103700	Os_HD-ZIP_2	13.8974	11.9332	12.874	20.3013	19.2478	17.2937	10.5534	9.79428	12.7715	28.6948	18.9064	21.0637
Os10g0561800	Os_HD-ZIP_3	13.6969	22.0686	14.3967	4.03682	4.27928	6.69525	11.2278	8.61586	16.0405	2.38777	2.37749	4.3699
Os08g0292000	Os_HD.ZIP_10	2.93535	2.99754	2.78432	2.16193	2.20456	3.0517	2.74424	2.44159	2.5074	0.746403	0.908515	1.19889
Os03g0188900	Os_HD.ZIP_11	13.5896	15.8671	15.0079	13.3425	13.0845	16.5167	16.9902	15.5709	18.3058	5.86	7.34482	10.2981
Os06g0140700	Os_HD.ZIP_12	3.29392	2.79568	3.62436	0.811384	1.20278	0.632549	1.99787	2.05762	2.54413	1.42122	1.17925	0.948279
Os09g0470500	Os_HD.ZIP_13	16.1706	21.1927	14.3001	17.7877	16.4954	20.9551	12.7235	15.6257	18.6742	6.68128	10.5059	11.7419
Os02g0674800	Os_HD.ZIP_14	11.9432	13.0157	11.7605	8.99153	9.11458	11.0313	12.0385	10.8388	12.6673	5.65368	8.94842	9.31529
Os02g0565600	Os_HD.ZIP_15	2.46592	2.79893	2.83619	9.65187	7.74344	8.48912	2.56086	2.39295	2.58452	5.54864	7.58545	7.95491
Os03g0640800	Os_HD.ZIP_16	0.407938	0.319599	0.427487	0.816857	0.893752	0.757271	0.296913	0.392042	0.183319	0.597373	0.959723	1.09611
Os03g0231000	Os_HD.ZIP_17	5.48429	3.63953	4.10749	17.0725	13.2212	18.0279	3.52207	2.60428	4.40353	14.1218	16.4828	17.991
Os03g0231150	Os_HD.ZIP_18	8.34159	10.327	9.65874	38.2733	34.6779	37.3983	8.38565	7.52443	7.26512	36.6974	39.9926	39.2926
Os02g0649300	Os_HD.ZIP_19	1.21062	2.86815	1.27879	377.863	290.91	312.288	3.54217	6.47807	2.98672	419.348	375.359	520.275
Os03g0198600	Os_HD.ZIP_20	0	0.091829	0	8.52198	7.47734	3.60138	0	0.112643	0.0493802	6.02274	9.44153	5.49538
Os12g0612700	Os_HD.ZIP_21	1.06235	0.635575	0.865308	0.497281	0.410737	0.556388	0.632635	0.501196	0.7812	0.363665	0.222271	0.142989
Os08g0187500	Os_HD.ZIP_22	17.1078	17.2363	15.4015	11.4939	11.6159	13.3028	15.1219	13.0509	14.3932	6.45061	11.4709	13.4276
Os09g0528200	Os_HD.ZIP_23	19.7497	23.9019	17.0315	27.8108	31.2183	29.1049	16.4395	17.1765	19.3071	14.9455	25.2631	32.741
Os08g0416000	Os_HD.ZIP_24	41.3	48.5982	34.7903	67.3935	67.9272	60.6337	31.8705	37.6225	42.7499	27.873	50.408	63.8206
Os02g0149900	Os_HD.ZIP_6	2.27964	2.57182	2.27285	0.22358	0.251822	0.300186	1.13774	0.751134	1.71225	0.183944	0.479683	0
Os09g0447000	Os_HD.ZIP_7	3.56405	6.16531	3.89918	1.06031	0.551187	1.31409	3.11286	2.63053	4.4685	0.536821	0.918688	0.703574
Os08g0481400	Os_HD.ZIP_8	10.3953	12.1335	8.89019	6.95535	8.00423	12.6881	9.32941	8.63564	9.62002	1.16105	1.86531	3.65209
Os08g0136100	Os_HD.ZIP_9	3.20729	2.99137	3.26496	1.20145	1.15146	1.46646	2.2927	2.26036	2.70242	0.503214	0.609266	0.72862
Os07g0586700	Os_HRT.like	2.57502	2.48813	2.76588	2.26438	2.39677	1.92303	2.2126	2.3372	2.36254	1.61605	1.88765	2.07098
Os03g0161900	Os_HSF_1	89.865	61.6717	95.5982	14.9739	14.5061	20.7087	65.1429	76.174	59.3821	7.12098	6.43446	7.97408
Os02g0232000	Os_HSF_10	2.41758	3.32187	1.88545	7.71362	9.85036	9.69587	2.43637	2.09103	2.44442	5.38329	8.81678	11.2888
Os03g0224700	Os_HSF_11	5.50224	6.71627	5.46155	16.9472	16.907	14.3216	5.23899	5.72126	6.3112	28.1573	19.5139	18.6789
Os09g0456800	Os_HSF_12	0.304579	0.720207	0.3656	2.02241	1.67718	1.33995	0.473598	0.404472	0.746573	2.65004	2.8804	2.73302
Os04g0568700	Os_HSF_13	0.432509	0.660757	0.611868	4.05192	3.80428	4.73424	0.354146	0.872876	0.491976	3.05367	3.58347	3.30851
Os03g0745000	Os_HSF_14	0.1151	0.0270526	0.0542772	0.576194	0.422762	0.298394	0.188492	0.199107	0.261852	3.16934	1.21854	2.10176
Os02g0527300	Os_HSF_15	1.50535	1.89393	1.96258	8.56169	10.6474	6.22373	1.71599	1.94027	1.52207	46.5354	22.3564	29.1488
Os06g0553100	Os_HSF_16	0.26947	0.50668	0.762435	75.3882	75.9163	65.8231	0.784523	1.24305	1.81642	81.0067	63.1756	76.3358
Os01g0571300	Os_HSF_17	0.0702846	0.0220258	0.0220958	22.947	30.3807	23.323	0.102312	0.216146	0.307949	21.1727	29.6988	25.6915
Os01g0733200	Os_HSF_18	0.0567892	0	0	4.32117	7.20169	4.90748	0	0.0654915	0.0574198	13.6324	12.4425	20.5155
Os08g0546800	Os_HSF_2	0.859474	0.808026	0.607946	52.5401	60.5779	44.0681	1.50134	1.28853	2.21599	52.4697	69.0737	73.975
Os05g0530400	Os_HSF_4	3.40758	5.95712	4.96677	6.52529	5.8143	5.32153	3.68951	3.11782	4.98305	9.38491	9.07393	6.69906
Os09g0526600	Os_HSF_5	7.71158	9.84214	8.12627	31.0559	28.1829	27.4999	7.71366	8.64487	10.585	30.4171	30.0625	33.2531
Os10g0419300	Os_HSF_6	4.29897	5.00905	3.70942	29.8411	26.4346	26.4001	4.56861	4.48306	4.09238	36.0568	25.4717	27.5586
Os01g0625300	Os_HSF_7	3.49821	3.28881	2.67083	0.23826	0.289824	0.671779	1.86413	2.78557	1.72642	0.27443	0.0766767	0.452163
Os01g0749300	Os_HSF_8	6.61344	7.32162	6.26647	10.9797	9.34363	10.6467	6.57922	7.3774	5.93695	10.3278	9.04705	7.77839
Os03g0795900	Os_HSF_9	17.9322	17.8707	17.3793	30.6547	30.9618	31.5753	17.1333	16.9313	15.1711	33.681	29.0528	29.6201
Os03g0609500	Os_LBD_1	9.02341	9.50482	12.0079	1.25682	2.61197	2.23179	8.20088	6.26548	7.73835	0.644868	2.08759	4.29003
Os08g0130100	Os_LBD_10	3.25931	2.81097	2.8199	1.83388	1.37471	2.07944	2.64673	2.88897	1.9882	1.72431	1.19028	1.7016
Os07g0472200	Os_LBD_11	2.58716	2.44619	2.30059	2.39362	2.45781	3.11722	2.74385	2.65967	2.98958	1.23863	1.91898	2.2472
Os08g0159500	Os_LBD_2	79.2327	78.1997	85.8623	11.3414	13.7912	13.5328	84.7389	66.0402	81.9661	9.88659	11.5847	9.44606
Os03g0639600	Os_LBD_3	6.9259	8.07348	6.54588	10.8356	11.6207	10.4368	6.90319	6.74928	6.83926	13.995	13.0361	11.1904
Os01g0511000	Os_LBD_4	4.51206	5.8769	5.14201	3.01166	3.56168	3.52005	7.18386	8.18464	8.69662	3.0087	4.41337	4.26803
Os03g0445700	Os_LBD_5	0.685902	0.293111	0.352851	0.998875	0.675029	0.933994	0.136152	0.359549	0.630471	0.469597	1.72209	1.53867
Os03g0287400	Os_LBD_6	0.115293	0.054196	0	7.25573	8.60314	3.85243	0.251745	0.465363	1.57375	10.7992	15.4431	13.599
Os07g0589000	Os_LBD_7	33.9325	50.8946	29.7829	25.0241	30.3842	32.1668	37.3316	38.3782	62.2723	15.0177	26.7839	50.7232
Os01g0889400	Os_LBD_8	0.288532	0.479922	0.313987	0.609502	0.772303	1.02292	0.533088	0.460725	0.448824	0.438768	0.715129	1.16108
Os01g0612700	Os_LBD_9	0.909869	1.40088	1.38046	1.47112	1.41733	1.85362	1.06534	1.84007	1.18663	0.620677	0.704083	0.976173
Os06g0504450	Os_M.type_MADS_1	0.356204	0.441435	0.442838	0.833685	0.826313	1.10068	0.406565	0.541493	0.229192	0.518227	0.86451	0.719157
Os01g0922800	Os_M.type_MADS_2	3.35513	3.8039	2.94386	6.37612	6.47002	5.62049	3.65924	3.93666	3.40629	8.6437	6.53501	6.96602
Os08g0494100	Os_M.type_MADS_3	0.892816	0.149888	1.08262	0	0.0246564	0	0.382933	0.257407	0.193442	0	0.0293542	0
Os03g0186600	Os_MIKC_MADS_10	7.81348	8.8252	7.49279	12.4103	13.5371	12.5157	7.81458	8.56972	7.88919	9.46438	9.366	9.26547
Os08g0112700	Os_MIKC_MADS_11	1.87458	4.13054	2.98344	8.74736	8.94634	10.9008	5.3403	4.01966	4.35348	6.12127	4.71875	6.70728
Os02g0579600	Os_MIKC_MADS_12	0.0480457	0.25295	0.235629	0.786147	0.482973	0.5093	0.440615	0.609489	0.34977	0.832219	0.530764	0.540623
Os10g0536100	Os_MIKC_MADS_2	4.55732	7.31398	3.16933	3.77741	3.24939	5.03883	12.4208	11.7475	11.2572	5.10735	4.79477	5.86138
Os02g0731200	Os_MIKC_MADS_3	2.30027	2.4912	2.08437	2.3998	1.47353	2.39055	2.12971	1.93755	1.74436	1.39055	1.52592	1.04619
Os06g0712700	Os_MIKC_MADS_4	0.833385	0.88698	0.949119	1.16949	1.45907	1.25012	1.28753	1.19683	1.25601	3.93747	4.21239	4.53198
Os06g0217300	Os_MIKC_MADS_5	0.449075	0.572977	0.429586	0.179846	0.213312	0.221755	0.483277	0.488297	0.59028	0.247611	0.141742	0.183635
Os01g0883100	Os_MIKC_MADS_6	0.511793	0.658426	0.787541	0.20034	0.354091	0.372437	0.499937	0.403834	0.599183	0.329647	0.173582	0.186112
Os07g0605200	Os_MIKC_MADS_7	2.41638	2.64415	3.44957	3.20305	2.59342	3.10367	1.62899	1.93391	1.4953	5.58118	2.45545	2.3199
Os05g0203800	Os_MIKC_MADS_8	0.00612705	0.00576029	0	0.0140215	0.0331646	0.00705965	0.0468248	0.0847914	0.0371705	0.121126	0.0846076	0.169335
Os02g0104100	Os_MIKC_MADS_9	2.20776	2.59144	2.35326	3.33337	3.91942	3.91354	4.43559	4.61005	4.3853	4.34116	6.19354	7.56901
Os05g0553400	Os_MYB_10	11.0359	21.6373	10.5417	4.72186	5.21498	6.08613	11.894	13.6516	25.2734	3.15221	7.20719	8.47225
Os01g0863300	Os_MYB_11	2.69371	4.44375	3.73887	73.1882	65.7106	55.2812	3.49575	4.57181	3.44306	107.269	89.4131	117.489
Os11g0700500	Os_MYB_12	21.0152	29.4062	19.0365	3.94247	5.81985	7.26419	21.2361	27.11	25.3995	1.15019	2.96945	3.42499
Os02g0695200	Os_MYB_13	2.03479	2.67819	1.15144	0.372523	0.40909	1.12536	3.28782	5.25638	9.79316	0.459724	0.674355	0.883707
Os05g0140100	Os_MYB_14	2.44908	0.926284	2.33634	0.112737	0.08707	0.162175	1.50593	1.81798	0.768498	0.159001	0.233234	0.111142
Os12g0572000	Os_MYB_15	3.26998	1.75061	1.9275	0.519668	0.210712	0.732608	2.7271	0.942765	1.46946	0.171016	0.292669	0.268967
Os01g0853700	Os_MYB_16	9.64047	8.82384	10.0134	2.18675	2.62717	3.71893	10.2932	9.5505	9.74752	1.63916	2.2676	1.97018
Os09g0401000	Os_MYB_17	0.793882	1.36833	1.24789	0.908385	0.750294	0.711448	1.97421	1.67848	1.51621	0.747346	0.690238	0.56593
Os07g0629000	Os_MYB_18	8.77123	10.1612	8.50763	6.96834	5.65739	8.76518	7.66992	8.773	8.8266	3.20891	2.67881	4.55446
Os09g0532900	Os_MYB_19	3.59674	4.03114	2.94779	2.75864	2.25897	2.87741	5.09279	5.86863	8.78201	3.0754	2.97856	3.50362
Os12g0175400	Os_MYB_20	0.851134	2.4539	0.642183	1.07128	0.833654	1.04606	0.991181	0.916123	1.60643	0.320497	0.626837	0.784098
Os11g0558200	Os_MYB_21	6.43699	5.82474	7.05744	4.08166	3.94049	5.16083	6.1199	6.86663	6.21017	2.97934	3.87648	3.70626
Os01g0812000	Os_MYB_22	3.55837	2.93849	2.90248	5.38294	5.2304	5.18962	2.8699	3.5491	3.03065	5.13029	4.72187	4.17674
Os02g0187700	Os_MYB_23	1.69589	2.71634	2.01411	6.00114	4.03122	9.69773	1.98865	2.10064	2.47682	3.42947	2.60203	6.94364
Os01g0142500	Os_MYB_24	12.7925	15.1181	11.6123	28.6848	33.7774	27.5989	14.0712	12.1234	14.9245	25.5088	27.2874	30.5127
Os03g0771100	Os_MYB_25	0.786496	1.01183	0.741767	1.8946	1.95253	2.05089	0.406735	0.525115	0.460396	0.935233	0.87647	1.38918
Os01g0685400	Os_MYB_26	1.23317	1.03054	0.775358	2.03815	2.172	0.947246	1.12193	0.553053	1.59321	1.67683	3.40573	3.38108
Os09g0106700	Os_MYB_27	16.2472	25.0505	18.9599	56.094	63.3861	58.2074	18.3056	18.4371	25.2328	47.1489	66.8878	67.3541
Os04g0377932	Os_MYB_28	19.8167	20.8887	19.4178	57.9141	53.2671	53.178	23.0399	22.4576	21.4245	82.2921	61.4418	54.8693
Os11g0207600	Os_MYB_29	0.277263	0.325832	0.261494	0.436222	0.607455	0.372709	0.151352	0.133229	0.116809	0.435017	0.467949	0.319282
Os06g0258000	Os_MYB_3	2.13306	0.859446	1.96385	5.17198	4.39842	4.97398	0.609919	0.761405	0.924319	3.49013	3.13252	4.36122
Os01g0841500	Os_MYB_30	5.43062	5.89365	5.35093	14.6798	12.2033	10.9886	5.41163	7.00536	4.39765	24.8523	17.3692	13.9103
Os01g0298400	Os_MYB_31	0.187746	0.529522	0.118046	1.03832	0.774272	0.57686	0.273297	0.0721718	0.632768	1.47284	1.03702	1.54427
Os06g0637500	Os_MYB_32	3.31519	5.38347	4.45311	11.8686	9.4772	13.9481	2.85164	3.12808	4.57092	10.261	18.4041	17.8486
Os05g0429900	Os_MYB_33	0.612432	1.2667	1.03968	3.04832	3.50441	2.18752	0.869216	0.565024	1.67193	4.32399	4.84867	5.44047
Os02g0624300	Os_MYB_34	0.653862	1.00591	0.280307	0.816184	0.643497	0.342448	0.259585	0.616957	0.781326	2.68596	2.79081	2.64023
Os12g0238000	Os_MYB_35	0.235046	0.18698	0.144944	1.10165	0.957692	0.718722	0.157916	0.302341	0.191953	1.33612	1.28164	0.794156
Os04g0594100	Os_MYB_36	1.07949	0.559928	0.596814	2.15092	4.46145	3.60272	0.568949	0.472205	0.677466	1.75208	3.87225	3.85784
Os02g0732600	Os_MYB_37	0.326954	0.461075	0.256967	1.77703	2.4018	2.26032	0.23797	0.188528	0.0550975	0.769472	1.10363	1.5598
Os01g0128000	Os_MYB_38	0.310401	0.87546	0.0731869	7.0146	8.94075	7.01881	0.550683	0.536949	0.745387	4.49266	8.46539	5.7063
Os03g0315400	Os_MYB_39	1.19532	1.88308	1.73672	21.44	34.4987	16.8622	1.62244	1.9746	2.41719	15.784	30.0677	27.1043
Os05g0132700	Os_MYB_40	0.162543	0	0.0383247	1.06942	1.09977	0.468208	0.0887286	0.0937252	0.123261	1.75967	1.75821	1.28349
Os11g0684000	Os_MYB_41	3.03221	7.28751	3.2468	74.1518	68.4895	46.3381	5.57547	6.389	6.82331	106.624	94.9294	79.9537
Os06g0112700	Os_MYB_42	0	0	0.103941	1.26104	1.49134	1.39681	0	0.127096	0.0557161	0.622489	1.62331	2.12122
Os04g0517100	Os_MYB_43	3.40766	5.24559	5.05035	64.6359	77.3418	31.9285	5.02859	4.96629	6.32306	164.767	121.38	117.797
Os07g0688200	Os_MYB_44	0.18373	0.820476	0.173281	11.9831	10.2291	6.13916	0.351029	0.476739	0.510867	12.1072	15.6454	13.1478
Os12g0564100	Os_MYB_45	0.269823	0.704643	0.311028	33.3439	30.1142	20.9334	0.752819	1.41755	1.12159	35.8996	40.6266	32.9061
Os07g0558100	Os_MYB_46	1.26603	1.64172	0.699949	33.1936	42.9397	22.384	1.04856	1.56073	1.10353	50.2618	48.2676	61.878
Os02g0618400	Os_MYB_47	0.0331796	0	0.0312926	0.721337	0.71838	0.535218	0	0	0.033548	0.530989	1.03852	0.818741
Os10g0478300	Os_MYB_48	0.0510702	0.288079	0.16858	6.41336	7.95733	3.35408	0.139391	0.14724	0.258186	10.8172	11.4011	7.86371
Os05g0442400	Os_MYB_49	0.114716	0.377472	0.162288	2.52679	3.50386	1.65221	0.125242	0.0661475	0.173985	15.8208	6.6004	9.9642
Os01g0305900	Os_MYB_5	2.71314	2.5609	2.67098	1.84289	1.54631	2.19201	1.86458	1.67041	1.26781	1.99444	1.47274	1.89913
Os01g0702700	Os_MYB_50	0.87031	1.07855	0.596956	0.226326	0.458847	0.364647	0.561462	0.410594	0.639981	0.186203	0.218509	0.195235
Os01g0285300	Os_MYB_51	1.2232	0.541166	1.1197	0.411653	0.389467	0.497428	1.02121	0.705319	0.691142	1.1515	0.463673	0.603674
Os05g0449900	Os_MYB_52	9.20142	8.15631	9.20501	7.16318	6.9118	7.95148	5.38164	6.13947	5.3828	5.56846	5.02194	6.26023
Os07g0139500	Os_MYB_53	4.41882	4.74534	4.22766	6.62512	6.22086	7.13847	4.53582	5.28508	4.28364	5.84087	5.56089	4.61336
Os06g0605600	Os_MYB_54	1.92244	2.5025	2.23152	3.46878	3.39237	3.57816	2.04502	3.06974	2.19299	2.92344	2.90425	2.53004
Os01g0874300	Os_MYB_6	5.66975	6.66295	8.19532	34.3415	34.3587	30.2494	2.96043	4.26429	4.73572	32.0244	40.281	58.4568
Os03g0720800	Os_MYB_7	2.47198	2.91237	2.3314	5.15579	4.69403	4.50672	1.36648	2.20124	1.58192	2.59219	3.86002	3.89157
Os05g0459000	Os_MYB_8	0.731769	0.654407	0.681736	0.398234	0.393333	0.370164	0.565086	0.668948	0.703803	0.588063	0.345045	0.361144
Os12g0567300	Os_MYB_9	17.0421	21.8609	16.0729	44.8843	39.6876	37.3829	21.969	24.5813	20.3963	39.6167	45.9228	41.5873
Os05g0579600	Os_MYB_related_10	31.6156	29.7868	35.6279	0.116196	0.157048	0.234012	26.3863	24.6712	24.6424	0.254924	0.18697	0.200467
Os01g0192300	Os_MYB_related_11	45.9949	57.371	44.5682	300.394	271.58	271.138	40.3043	47.1106	40.5394	293.121	324.718	326.354
Os01g0663051	Os_MYB_related_12	12.5253	2.33324	11.7033	0	0.0299856	0	2.96354	1.43105	1.01943	0.21903	0	0
Os06g0728700	Os_MYB_related_13	43.5141	55.6179	44.8895	142.299	131.681	160.844	58.1635	71.5648	53.3594	66.8124	85.4711	80.8357
Os05g0567600	Os_MYB_related_14	4.68807	2.20372	5.89527	0.0496688	0	0.0500152	1.0426	1.0012	0.746131	0.163454	0	0
Os01g0603300	Os_MYB_related_15	35.062	35.2341	31.6527	2.26141	2.37725	3.41576	28.13	23.594	26.9771	1.27479	2.3585	3.61249
Os07g0443500	Os_MYB_related_16	2.64355	0.392417	2.27997	0	0	0	0.436715	0.220625	0.263774	0.0818615	0	0.0171664
Os10g0562100	Os_MYB_related_17	114.965	104.951	113.954	21.8259	20.5696	28.8628	98.6049	89.4484	94.806	10.3304	12.2708	18.6574
Os01g0524500	Os_MYB_related_18	51.3888	58.5466	60.1443	10.1201	13.4327	14.3193	30.4537	39.387	50.2167	5.25181	8.76847	13.4754
Os08g0510700	Os_MYB_related_19	11.2415	14.0914	10.6977	8.28554	8.58818	9.76304	11.0936	11.9519	13.0388	5.05292	7.27214	9.52975
Os09g0491644	Os_MYB_related_2	11.6148	14.1234	8.52724	39.2333	41.034	34.298	11.3137	13.8758	13.4315	36.5337	46.2912	53.0651
Os06g0303700	Os_MYB_related_20	1.94859	2.10335	1.93136	2.06964	2.03693	2.19321	3.23048	3.65168	2.49927	1.73246	2.08452	2.0391
Os03g0241100	Os_MYB_related_21	17.9494	18.1642	18.7141	15.9209	15.2403	18.2343	16.8272	18.4186	14.1852	10.9906	11.273	11.2841
Os07g0695900	Os_MYB_related_22	2.37878	3.04333	2.63669	2.70785	2.67379	3.19296	3.29317	3.62003	3.49621	2.51637	2.48337	2.44478
Os05g0126400	Os_MYB_related_23	36.144	39.744	35.5901	60.8019	55.781	59.6875	33.0548	42.3188	35.696	49.3915	57.326	49.0153
Os02g0551400	Os_MYB_related_24	5.8631	6.96352	5.70004	11.1343	10.2865	10.4644	5.68388	6.5911	5.99463	9.22995	10.2659	9.40206
Os08g0159000	Os_MYB_related_25	3.57639	3.36231	3.01296	4.62099	5.37559	4.74581	3.68519	3.63784	4.16461	5.22035	6.76974	7.29808
Os06g0181300	Os_MYB_related_26	0.778291	1.05904	1.06241	1.64048	1.47288	1.60472	0.849705	0.708596	0.807642	1.33037	1.24442	1.45555
Os03g0750800	Os_MYB_related_27	20.1764	22.4213	20.2391	35.4082	33.6752	34.0683	19.3468	22.9621	19.159	38.2894	34.399	32.4165
Os06g0105800	Os_MYB_related_28	9.94483	10.5166	9.91752	20.1544	21.139	17.2947	10.2031	12.6699	9.39164	23.0891	20.9504	18.1532
Os05g0126300	Os_MYB_related_29	66.7611	78.1239	70.8055	148.737	137.738	124.772	66.6239	83.8469	69.604	161.385	148.291	125.309
Os01g0975300	Os_MYB_related_3	42.0853	77.6595	37.328	30.0821	29.0705	21.8992	51.4765	70.6939	78.3475	12.4852	18.0257	20.7184
Os03g0425800	Os_MYB_related_30	33.165	33.1942	33.124	66.2712	62.9891	62.4719	33.401	38.505	27.9758	83.6826	63.1553	54.9695
Os08g0151000	Os_MYB_related_31	3.62792	4.38867	3.67284	9.00633	7.83726	8.14102	3.35146	4.31552	3.71951	9.2427	7.76569	6.9615
Os01g0589300	Os_MYB_related_32	21.9648	26.292	20.5458	36.6348	39.0271	37.5126	17.6248	17.9598	16.9599	46.4955	32.9551	34.8304
Os04g0676700	Os_MYB_related_33	8.34175	12.0858	9.01827	22.7528	21.0961	22.9596	9.9467	11.9142	10.5472	26.3752	21.9761	22.9519
Os06g0669700	Os_MYB_related_34	9.71806	10.5049	8.84997	32.9089	35.6106	31.5744	10.0513	9.84603	8.59275	48.9458	35.8397	33.3977
Os02g0685200	Os_MYB_related_35	1.78981	2.21516	1.64528	19.9481	22.2839	20.5962	2.47346	1.98569	2.38236	12.9886	22.6712	18.4041
Os01g0187900	Os_MYB_related_36	2.15536	3.97227	1.95212	21.7459	20.939	10.998	3.41764	3.92574	3.78782	40.7575	36.755	28.1969
Os04g0583900	Os_MYB_related_37	0.828478	1.42032	0.896267	93.612	118.479	75.4961	2.04842	2.16377	2.06956	116.184	127.481	101.713
Os01g0193900	Os_MYB_related_38	3.24839	3.77725	2.76804	5.68133	4.83641	4.80987	3.60868	4.92917	3.65901	5.90136	5.39066	4.57039
Os08g0144000	Os_MYB_related_4	33.3806	40.4768	36.7404	68.8384	71.4846	62.565	33.0359	39.4575	34.5703	56.0067	59.5733	52.3735
Os08g0157600	Os_MYB_related_5	2954.84	2776.45	3004.77	1175.79	1063.78	1619.04	2781.29	2931.94	2411.83	511.998	659.137	725.499
Os02g0706400	Os_MYB_related_7	8.61505	8.4443	9.66153	2.40143	2.29243	3.1284	6.82583	6.05929	4.28858	1.03621	1.01332	1.05749
Os07g0484700	Os_MYB_related_8	8.72926	9.65635	8.98338	5.96167	5.24998	7.47898	6.48924	8.54684	6.81452	4.49508	4.92238	5.86683
Os02g0680700	Os_MYB_related_9	26.2754	26.6168	30.4113	7.83721	8.69687	11.3949	24.9663	25.973	22.8979	4.91574	5.789	6.46664
Os07g0684800	Os_NAC_1	16.5635	26.0023	12.2319	162.66	134.664	138.993	14.6713	21.7146	17.4584	89.6203	111.268	107.308
Os12g0123700	Os_NAC_11	0.628894	0.93355	0.780431	48.4404	34.3224	48.9689	1.80684	1.94676	1.8407	27.9812	24.1027	26.4633
Os02g0285900	Os_NAC_13	3.99928	4.82804	5.57203	0.884019	1.40567	2.04219	7.34323	4.5073	6.43314	0.385041	0.585725	1.43544
Os03g0327100	Os_NAC_14	11.4807	12.1626	11.8179	360.016	414.051	186.951	8.61491	9.80306	10.9233	496.741	505.567	508.935
Os06g0726300	Os_NAC_15	18.5987	28.6886	24.5783	9.84415	11.1091	15.3343	20.6092	15.2196	29.0524	6.34289	7.023	10.9377
Os03g0133000	Os_NAC_16	6.00565	7.79377	8.96526	4.15262	4.30204	3.90563	8.32662	5.56625	8.86635	3.32973	3.56146	4.43678
Os01g0884300	Os_NAC_17	58.4049	78.8421	60.0885	737.994	870.99	526.733	70.1012	72.7419	70.2605	1175.5	1092.9	1141.2
Os04g0460600	Os_NAC_18	2.64546	2.32969	2.21077	12.7978	10.7201	7.17659	2.63228	2.78051	3.08114	11.3486	11.7145	15.8654
Os01g0946200	Os_NAC_19	7.55191	11.1067	8.39177	3.63612	5.31923	5.94451	6.28568	6.55342	11.4159	0.844661	0.963673	4.20674
Os01g0261200	Os_NAC_2	18.4241	22.6366	18.439	47.2071	39.7285	40.1564	21.2801	22.8889	21.9667	77.3043	49.3363	49.7172
Os04g0515900	Os_NAC_20	0.460199	0.478194	0.434026	0.34643	0.168562	0.362799	0.370208	0.474853	0.514289	0.136807	0	0.3347
Os05g0563000	Os_NAC_21	1.01106	0.844927	0.812295	0.342782	0.52121	0.25888	0.449711	0.561406	0.56794	0.176259	0.172366	0.22177
Os09g0509100	Os_NAC_22	2.18672	1.98614	1.85263	1.08142	1.14637	1.36654	1.4567	1.49599	1.42404	0.872262	0.375319	0.402411
Os03g0221300	Os_NAC_23	4.14861	4.64669	4.20797	3.55063	2.97449	4.94757	5.05424	4.86172	3.56152	2.22115	1.88385	2.5717
Os10g0359500	Os_NAC_24	5.78093	6.91833	5.71555	10.9766	9.57737	10.3774	4.36003	5.94214	4.4615	10.8184	7.48147	7.02916
Os01g0191300	Os_NAC_25	3.79959	3.74534	3.39889	6.65974	6.45484	6.27502	2.46379	2.70877	1.92089	4.27055	4.68501	4.68226
Os01g0672100	Os_NAC_26	1.16616	1.23513	1.35044	2.00154	1.60944	1.30965	0.709104	0.52773	0.746272	1.36183	1.48124	1.64644
Os01g0925400	Os_NAC_27	18.1628	20.8413	15.7621	27.6178	35.512	22.0414	16.135	15.1321	20.3895	24.4445	50.8609	52.76
Os10g0571600	Os_NAC_28	3.40116	4.82345	1.52231	4.51834	4.41301	2.72327	3.90205	2.65922	6.41156	12.8614	8.75639	10.8679
Os01g0862800	Os_NAC_29	0.910634	2.63972	1.89662	1.21564	1.26161	0.655776	0.414246	0.656361	0.805653	2.89323	1.08283	0.973737
Os09g0493700	Os_NAC_3	11.2662	12.9245	11.1315	16.5999	15.1763	14.6037	11.1041	11.7037	11.3913	18.4549	16.401	15.5992
Os11g0127600	Os_NAC_30	2.87233	2.94273	1.84071	2.31748	2.84751	2.20635	3.3369	2.71793	2.27125	9.87984	5.89868	7.23316
Os08g0157900	Os_NAC_31	28.6789	36.6375	30.0482	88.5358	77.6845	67.2429	31.953	33.6056	32.1335	126.768	99.3389	84.4352
Os06g0560300	Os_NAC_32	0.739216	1.05756	0.636551	1.45263	2.06275	1.74049	0.456155	0.259454	0.747424	1.21023	1.15392	2.47442
Os08g0562200	Os_NAC_33	25.7082	27.055	22.7569	83.4168	87.2952	62.5338	27.2536	28.9111	27.967	104.338	94.8955	79.0498
Os02g0579000	Os_NAC_34	3.90383	7.51845	4.78993	66.2659	74.7047	46.072	11.2551	11.5392	6.9363	38.1771	35.9731	53.1598
Os07g0566500	Os_NAC_35	0.16085	0.332687	0.212382	0.552147	0.373135	0.518931	0.280974	0.333896	0.292744	1.21137	0.977304	1.80992
Os01g0816100	Os_NAC_36	2.08931	5.19432	2.62731	6.48131	5.63656	4.44016	2.48377	2.46301	4.88223	15.0791	14.7888	13.794
Os12g0477400	Os_NAC_37	20.0908	22.3544	17.386	73.062	89.1634	63.2284	9.91711	10.5988	15.2354	51.7596	73.7357	86.9166
Os02g0810900	Os_NAC_38	1.26061	1.07334	0.96459	3.97347	2.94272	3.15161	0.623219	0.960043	0.601228	4.47816	4.02891	5.44662
Os01g0675800	Os_NAC_39	1.30339	2.49976	2.016	12.1995	12.9409	12.1945	1.70759	1.443	3.37374	17.6196	15.3106	16.8789
Os03g0777000	Os_NAC_4	2.84541	2.98256	2.15921	1.74017	1.59327	1.80883	1.35686	1.54642	1.45504	2.03205	1.68608	0.968461
Os11g0184900	Os_NAC_40	45.558	53.6472	52.7485	255.888	250.461	192.069	45.8876	44.7915	51.6255	447.571	313.141	363.181
Os04g0619000	Os_NAC_41	0.234892	0.186857	0.238574	0.951034	0.656671	0.291464	0.177539	0.187537	0.109615	1.63291	1.51367	0.873889
Os05g0194500	Os_NAC_42	0.900971	1.39583	0.957444	7.20917	8.64477	5.73152	0.872809	0.92196	1.14193	9.44919	12.7568	9.65701
Os12g0123800	Os_NAC_43	3.26278	4.32403	2.92892	32.9481	42.1306	15.2641	3.648	3.71743	3.89522	72.0142	57.6852	45.4362
Os06g0675600	Os_NAC_44	0.764738	1.03351	0.465805	10.8286	8.84548	5.19505	0.678363	1.23102	0.837666	16.228	15.5616	11.0551
Os07g0683200	Os_NAC_45	8.33392	17.9816	4.45699	196.637	147.897	84.3983	10.9811	15.6869	15.8521	209.15	262.704	259.006
Os11g0126900	Os_NAC_46	0.705285	1.29456	0.411775	45.6921	36.2021	41.8314	0.623333	1.3556	1.59602	28.7708	25.4764	25.0613
Os05g0421600	Os_NAC_47	2.34403	3.63206	2.86575	69.8095	73.8445	48.4647	2.70129	3.05365	4.43289	129.946	95.9064	130.508
Os02g0555300	Os_NAC_48	0.122269	0	0	12.1716	6.5709	6.62131	0.200231	0	0.123626	8.34485	9.22985	6.99968
Os01g0104200	Os_NAC_49	0.484761	0.170904	0.285745	4.19476	5.10728	3.00219	0.264621	0	0	5.24797	12.2165	6.69872
Os06g0101800	Os_NAC_5	3.37027	3.69325	3.1786	8.04434	5.99236	7.66758	3.49203	4.10953	3.29917	5.21376	5.75075	6.05992
Os08g0103900	Os_NAC_50	1.96822	2.43474	2.11681	0.829719	0.827723	0.557003	0.75397	0.637143	1.2918	1.26773	1.01722	1.5678
Os10g0413700	Os_NAC_51	0.555834	0.620542	0.556986	0.258376	0.349215	0.160109	0.455126	0.320504	0.45663	0.130813	0.191885	0.480052
Os02g0594800	Os_NAC_52	0.446926	0.560231	0.649826	0.277001	0.34559	0.171651	0.264298	0.408035	0.376574	0.157773	0.205718	0.349232
Os05g0418800	Os_NAC_53	6.19425	7.42816	5.32269	4.07934	4.7259	4.18709	4.59858	5.96875	6.73624	3.62827	4.28311	6.35855
Os01g0888300	Os_NAC_54	3.87302	4.6983	4.47757	3.1629	3.5745	2.7351	4.0238	3.96223	5.96879	2.17583	4.42808	3.94615
Os02g0822400	Os_NAC_55	2.50211	1.92464	2.22329	3.76211	3.58174	4.0266	2.46078	2.62321	2.59262	3.21196	3.92152	3.10242
Os03g0815100	Os_NAC_7	30.6849	43.5675	36.3685	493.899	480.601	357.842	28.5941	26.8607	32.7357	741.535	729.783	894.454
Os03g0327800	Os_NAC_8	6.08757	12.1213	5.11848	131.278	149.523	68.1234	6.14456	9.40472	10.1618	145.16	184.831	179.41
Os12g0610600	Os_NAC_9	3.74404	6.81913	2.89015	15.1709	14.3705	12.7424	3.93919	6.08478	6.10946	7.95646	12.3536	12.8185
Os01g0158900	Os_NF.X1_1	2.23492	3.45672	2.3968	9.97129	9.33773	9.53203	1.57419	1.78755	1.87704	5.02225	5.65798	4.51867
Os03g0696300	Os_NF.X1_2	18.7723	20.8375	16.9601	33.5247	25.8437	42.855	15.3871	19.3222	15.4625	28.4347	19.5697	22.5986
Os06g0252300	Os_NF.X1_2.1	21.5053	25.3832	22.8731	89.9863	99.6233	67.3273	18.3801	18.9173	20.276	100.965	110.765	91.1428
Os03g0174900	Os_NF.X1_3	2.84594	3.76132	2.43123	5.32116	4.97537	5.22757	3.10707	3.28204	2.89839	5.12526	3.94889	4.23394
Os03g0647600	Os_NF.X1_4	1.41435	1.69447	1.2985	0.608669	0.716202	1.03835	1.21617	1.22692	1.32881	0.424177	0.460898	0.691835
Os08g0196700	Os_NF.X1_5	4.44931	4.50186	3.55648	6.50648	7.14322	9.21857	3.6813	3.8886	3.2883	4.0758	4.66539	3.52514
Os02g0776400	Os_NF.YA_6	0.568168	0.738395	0.425532	0.449345	0.36181	0.500614	0.510837	0.674505	0.60827	0.267431	0.276909	0.34638
Os03g0411100	Os_NF.YA_7	6.63494	8.09555	6.39364	6.31283	6.41316	6.81388	5.08637	6.47065	5.61482	3.15016	3.74451	3.78701
Os12g0618600	Os_NF.YA_8	0.430265	0.284655	0.27053	0.0820538	0.123225	0.201974	0.243571	0.257288	0.128902	0.135015	0.0880217	0.110105
Os07g0608200	Os_NF.YA_9	4.13057	4.61956	4.04048	3.69848	3.97766	4.10466	3.85578	4.21458	3.33805	3.75835	3.51984	3.18283
Os03g0413000	Os_NF.YB	56.9076	50.2255	65.2938	3.10073	3.99132	7.21115	44.6598	47.0259	50.82	1.0933	1.36614	2.92951
Os08g0174500	Os_NF.YB_1	0.832449	0.545462	0.761316	0.115456	0.136542	0.174392	0.523267	0.494552	0.663152	0.0712411	0.0464451	0.0497977
Os07g0606600	Os_NF.YB_2	18.9482	17.1208	17.8706	2.82614	3.24964	5.18199	13.8449	12.754	16.9968	2.77626	2.64707	4.07529
Os01g0834400	Os_NF.YB_3	5.40922	5.5325	5.35387	6.97157	7.58407	8.01328	5.1268	5.55261	5.28898	6.71491	6.97701	7.24596
Os05g0573500	Os_NF.YB_4	0.50359	0.449773	0.403708	1.23888	1.18769	1.07345	0.412349	0.667874	0.483723	1.27999	0.74176	0.99413
Os05g0463800	Os_NF.YB_5	4.47879	6.12169	4.27281	13.0879	12.0415	11.3928	5.90531	6.0988	5.32972	16.492	13.8918	12.4121
Os08g0383700	Os_NF.YB_6	5.04079	6.17178	5.93342	9.21063	8.46042	8.46444	5.41799	4.50638	4.97823	7.65134	6.36719	5.51544
Os11g0544700	Os_NF.YC_2	9.46844	12.3921	9.13375	16.4422	15.6001	15.3233	10.3587	11.667	9.19619	14.7571	15.1002	13.4563
Os05g0494100	Os_NF.YC_3	7.65193	7.94977	6.66766	11.912	11.6838	10.6055	5.87205	7.86532	5.214	13.7021	11.179	10.1251
Os06g0667100	Os_NF.YC_4	1.51251	1.93682	1.50028	2.84962	3.19613	2.86949	1.42353	1.41347	1.55567	2.1726	3.40898	2.72842
Os09g0480700	Os_NF.YC_5	5.19903	6.24228	6.5575	7.88407	8.96069	12.4138	4.44512	5.92348	7.22013	5.18911	5.0745	9.58323
Os03g0251350	Os_NF.YC_6	93.8651	99.036	96.5425	6.599	9.79087	13.29	60.3758	69.1766	86.6647	1.66004	2.63465	5.10753
Os09g0549450	Os_Nin.like_1	7.79075	5.09413	7.84345	2.68358	2.99129	4.28639	5.26818	6.27988	4.36111	2.49967	1.6131	1.66302
Os01g0236700	Os_Nin.like_2	192.915	172.53	200.064	73.335	71.289	79.1489	155.646	174.624	131.454	62.6386	57.3691	55.7544
Os04g0495800	Os_Nin.like_3	15.0868	13.9156	14.5094	8.92926	9.89261	9.8414	12.6545	13.9532	12.6973	7.0487	7.38374	6.97456
Os01g0246500	Os_Nin.like_4	1.19101	1.33744	1.15448	2.87701	2.78847	2.3634	1.40866	1.1446	1.12061	3.30131	3.21317	2.67771
Os02g0136000	Os_Nin.like_5	0.303601	0.21407	0.238612	2.54752	2.99321	2.24462	0.165729	0.262593	0.665105	1.4052	2.77162	2.697
Os05g0549800	Os_RAV	3.55824	5.64853	3.02579	7.40871	7.57775	9.34226	1.71947	2.08539	2.47714	2.08668	3.38308	6.21821
Os01g0140700	Os_RAV_3	5.76226	8.126	4.07591	3.54393	4.34433	1.24487	1.02229	1.32905	1.16525	0.271224	0.198925	0.0710949
Os01g0141000	Os_RAV_4	31.172	56.1735	29.528	19.4221	22.3094	8.5466	48.4898	55.6287	92.2078	37.1415	54.2094	64.86
Os04g0408700	Os_S1Fa.like	13.679	15.8308	12.4484	20.6175	17.7527	21.153	13.3185	15.0832	13.2243	19.2404	15.0229	18.4366
Os04g0408900	Os_S1Fa.like_1	30.8367	43.4048	31.3076	45.5839	51.4715	44.5628	40.4828	37.0022	37.3869	59.9848	50.8684	45.2962
Os04g0656500	Os_SBP_2	1.81329	1.47744	1.6613	0.375443	0.280428	0.238776	1.33863	1.79242	1.58897	0.438941	0.317961	0.27273
Os02g0139400	Os_SBP_3	11.212	12.0846	12.9989	6.23426	5.28395	9.28761	11.3535	12.2224	8.67007	2.31081	2.76364	3.55248
Os02g0174100	Os_SBP_4	3.80006	3.65453	4.09359	1.89484	1.40182	2.55076	2.87367	4.30197	2.67901	1.27996	1.21959	1.78938
Os06g0663500	Os_SBP_5	2.77108	2.91491	2.83279	2.19513	2.08282	2.96958	2.79262	2.94989	2.56673	1.87895	2.01584	2.02747
Os05g0408200	Os_SBP_6	12.1958	13.291	11.8345	18.0161	18.3916	16.7382	11.5718	12.7075	12.2706	20.3439	17.852	16.8692
Os01g0922600	Os_SBP_7	1.26795	1.84576	1.54302	14.7189	10.6427	15.3164	1.65223	1.91036	2.04712	5.87188	6.15638	6.35855
Os09g0507100	Os_SBP_8	0.27365	0.257269	0.176586	0.131839	0.155917	0.0829742	0.204414	0.116268	0.131063	0.0406751	0.159107	0.099512
Os05g0386201	Os_SRS_1	0.181906	0.0855085	0.214451	0.728498	0.632972	0.31439	0.148948	0.157336	0.0919629	0.941835	2.05139	1.0324
Os01g0954500	Os_SRS_2	1.8778	3.23158	1.65094	28.6061	36.8914	24.8267	2.95354	3.3768	5.43852	27.4148	51.3625	48.5358
Os06g0108900	Os_TALE_1	13.2696	12.4753	12.6137	2.06262	1.93347	3.484	11.0971	11.5745	10.783	0.558354	0.867211	1.71039
Os10g0534900	Os_TALE_2	18.4749	24.6461	17.5068	7.92106	9.48628	11.8467	15.9288	14.0468	21.4857	2.10353	4.3427	7.62575
Os03g0732100	Os_TALE_3	9.78744	9.30288	9.04548	3.2531	3.49001	4.84247	8.1733	8.40695	8.56937	1.61121	2.52683	3.92932
Os03g0165300	Os_TALE_4	5.27039	6.62932	5.77624	4.73085	4.15969	5.92601	5.73414	7.71278	5.36566	2.0359	2.89439	3.12126
Os11g0158832	Os_TALE_5	21.1694	22.7964	19.4636	19.8304	19.0438	21.5889	21.2031	24.1065	28.0525	9.0161	14.45	18.3816
Os01g0848400	Os_TALE_6	0.438979	0.605297	0.331211	0.100459	0.181037	0.168599	0.383407	0.202499	0.443854	0.0550996	0.0269413	0.0866582
Os03g0124000	Os_TALE_7	5.54055	6.09215	4.82787	1.89501	2.56126	2.6507	3.90551	3.77819	5.60208	2.10899	3.02708	4.11346
Os01g0763200	Os_TCP_1	16.2979	13.7225	14.4216	5.92367	5.85647	9.05792	14.4179	14.1242	14.831	3.04595	3.28758	5.72499
Os08g0544800	Os_TCP_3	9.86501	10.9935	11.1086	6.03316	5.6554	7.83901	7.70626	6.12969	8.16882	3.20232	4.34509	7.00909
Os05g0513100	Os_TCP_4	8.93079	8.28079	8.24922	4.33688	3.79701	7.07226	6.76822	5.80443	7.38533	1.73346	2.23198	3.96829
Os12g0173300	Os_TCP_5	0.442006	0.79913	0.865804	0.272331	0.578406	0.470108	0.556804	0.548949	0.893828	0.192044	0.187803	0.268479
Os04g0194600	Os_TCP_6	0.893162	1.03242	0.911413	1.25654	1.22278	1.6702	1.31081	1.33397	1.45085	0.523781	0.606568	0.982755
Os12g0616400	Os_TCP_7	0.746698	0.877502	0.598598	0.299038	0.375304	0.752809	0.489128	0.495145	0.603992	0.246025	0.240591	0.350086
Os01g0924400	Os_TCP_8	59.8198	66.9711	61.3464	32.8031	39.4639	35.3593	56.5685	66.8921	63.1447	29.8314	35.9282	39.3631
Os02g0539600	Os_Trihelix_1	7.88031	9.51621	8.68151	11.4071	10.7687	12.0542	7.45379	8.50029	8.13953	30.6328	16.9168	17.3333
Os04g0541100	Os_Trihelix_10	0.518488	0.544799	0.575295	1.36103	0.825435	1.96793	0.46617	0.492421	0.246704	1.0049	1.01078	1.98687
Os04g0397500	Os_Trihelix_11	21.6003	15.8097	18.4577	24.4669	29.0334	21.0463	13.7695	17.387	13.0454	62.5034	43.3733	39.4928
Os05g0560600	Os_Trihelix_12	3.17011	3.63808	3.34035	6.76687	8.30067	5.84421	2.72106	2.54652	3.71374	11.7931	10.3049	14.0914
Os04g0602300	Os_Trihelix_13	4.47403	4.98944	4.8307	12.71	14.4587	7.99917	5.28879	5.23079	4.6797	32.6775	18.3213	15.106
Os04g0543500	Os_Trihelix_14	14.828	19.2105	16.7134	83.4881	99.8368	69.5898	15.5963	16.8916	16.2725	173.633	152.985	137.434
Os02g0648300	Os_Trihelix_15	0.566554	0.304366	0.458	4.7231	6.19589	3.45046	0.397633	0.326686	0.450093	3.00958	5.40191	5.1128
Os03g0113500	Os_Trihelix_16	1.01051	1.37053	0.93742	0.265371	0.37148	0.41992	0.65109	0.534921	1.05523	0.26511	0.366007	0.850259
Os02g0104500	Os_Trihelix_17	6.14643	3.14877	6.17871	1.24235	2.10603	2.50202	2.65202	3.39559	3.34923	1.55914	3.89646	3.45117
[truncated: 86 more rows]

## Sheet: Table S7
name	Gene ID	Degree	BetweennessCentrality	ClosenessCentrality	Gene description	Gene Symbol		Os_28 r correlation	Os_58 r correlation
[truncated: 787 more rows]

[truncated: 1 more sheets: Table S8]
